# Supplementary material for: CGGBP1-regulated heterogeneous C–T transition rates relate with G-quadruplex potential of terrestrial vertebrate genomes
Source: bioRxiv preprint, doi:10.64898/2025.12.10.693595, version 2 (2026-03-24)
Supplement: Table S2 [file 693595_file30.xlsx]

## Sheet: All species G4 density vs GC 
G4 density vs Genomic GC content all species
Clade	Rho	P	Lambda
All	0.558698	8.63643e-10	0.902703
Call:
lm(formula = pic_y ~ pic_x + 0)
Residuals:
Min 1Q Median 3Q Max
-71.148 -5.258 0.383 9.372 86.319
Coefficients:
Estimate Std. Error t value Pr(>|t|)
pic_x 118.90 16.02 7.423 3.71e-11 ***
---
Signif. codes: 0 ‘***’ 0.001 ‘**’ 0.01 ‘*’ 0.05 ‘.’ 0.1 ‘ ’ 1
Residual standard error: 17.55 on 101 degrees of freedom
Multiple R-squared: 0.353, Adjusted R-squared: 0.3466
F-statistic: 55.1 on 1 and 101 DF, p-value: 3.709e-11

## Sheet: All species G4 GC vs Background
G4 GC vs Genomic GC content all species
Clade	Rho	P	Lambda
All	0.32958	0.000674965	0.100951
Call:
lm(formula = pic_y ~ pic_x + 0)
Residuals:
Min 1Q Median 3Q Max
-2.06222 -0.09033 -0.00273 0.12838 1.63304
Coefficients:
Estimate Std. Error t value Pr(>|t|)
pic_x 1.3111 0.2855 4.592 1.27e-05 ***
---
Signif. codes: 0 ‘***’ 0.001 ‘**’ 0.01 ‘*’ 0.05 ‘.’ 0.1 ‘ ’ 1
Residual standard error: 0.3128 on 101 degrees of freedom
Multiple R-squared: 0.1727, Adjusted R-squared: 0.1645
F-statistic: 21.09 on 1 and 101 DF, p-value: 1.269e-05

## Sheet: All species G4 GC vs length
G4 GC content vs G4 length all species
Clade	Rho	P	Lambda
All	0.280335	0.00412926	0.100951
Call:
lm(formula = pic_y ~ pic_x + 0)
Residuals:
Min 1Q Median 3Q Max
-0.56231 -0.07238 0.01575 0.11093 0.60841
Coefficients:
Estimate Std. Error t value Pr(>|t|)
pic_x 1.9629 0.1296 15.15 <2e-16 ***
---
Signif. codes: 0 ‘***’ 0.001 ‘**’ 0.01 ‘*’ 0.05 ‘.’ 0.1 ‘ ’ 1
Residual standard error: 0.1901 on 101 degrees of freedom
Multiple R-squared: 0.6945, Adjusted R-squared: 0.6914
F-statistic: 229.6 on 1 and 101 DF, p-value: < 2.2e-16

## Sheet: Mammals G4 density vs GC 
G4 density vs Genomic GC content Mammals
Clade	Rho	P	Lambda
Mammals	0.439648	0.000698301	0.999927
Call:
lm(formula = pic_y ~ pic_x + 0)
Residuals:
Min 1Q Median 3Q Max
-32.847 -1.832 2.509 8.647 24.676
Coefficients:
Estimate Std. Error t value Pr(>|t|)
pic_x 47.89 13.53 3.54 0.000833 ***
---
Signif. codes: 0 ‘***’ 0.001 ‘**’ 0.01 ‘*’ 0.05 ‘.’ 0.1 ‘ ’ 1
Residual standard error: 10.66 on 54 degrees of freedom
Multiple R-squared: 0.1883, Adjusted R-squared: 0.1733
F-statistic: 12.53 on 1 and 54 DF, p-value: 0.0008333

## Sheet: Mammals G4 GC vs Background
G4 GC vs Genomic GC content Mammals
Clade	Rho	P	Lambda
Mammals	0.314113	0.0183933	0.999927
Call:
lm(formula = pic_y ~ pic_x + 0)
Residuals:
Min 1Q Median 3Q Max
-0.287096 -0.053773 -0.001938 0.056706 0.254597
Coefficients:
Estimate Std. Error t value Pr(>|t|)
pic_x 0.1420 0.1329 1.069 0.29
Residual standard error: 0.1047 on 54 degrees of freedom
Multiple R-squared: 0.02071, Adjusted R-squared: 0.002577
F-statistic: 1.142 on 1 and 54 DF, p-value: 0.29

## Sheet: Mammals G4 GC vs length
G4 GC content vs G4 length Mammals
Clade	Rho	P	Lambda
Mammals	0.642089	9.62318e-08	0.999927
Call:
lm(formula = pic_y ~ pic_x + 0)
Residuals:
Min 1Q Median 3Q Max
-0.251093 -0.050448 -0.000168 0.068916 0.264921
Coefficients:
Estimate Std. Error t value Pr(>|t|)
pic_x 0.4768 0.2484 1.92 0.0602 .
---
Signif. codes: 0 ‘***’ 0.001 ‘**’ 0.01 ‘*’ 0.05 ‘.’ 0.1 ‘ ’ 1
Residual standard error: 0.1024 on 54 degrees of freedom
Multiple R-squared: 0.06388, Adjusted R-squared: 0.04655
F-statistic: 3.685 on 1 and 54 DF, p-value: 0.06019

## Sheet: Aves G4 density vs GC 
G4 density vs Genomic GC content Aves
Clade	Rho	P	Lambda
Aves	0.66359	0.000219359	0.156862
Call:
lm(formula = pic_y ~ pic_x + 0)
Residuals:
Min 1Q Median 3Q Max
-41.500 -7.365 6.081 18.140 40.451
Coefficients:
Estimate Std. Error t value Pr(>|t|)
pic_x 283.12 38.88 7.281 1.6e-07 ***
---
Signif. codes: 0 ‘***’ 0.001 ‘**’ 0.01 ‘*’ 0.05 ‘.’ 0.1 ‘ ’ 1
Residual standard error: 21.58 on 24 degrees of freedom
Multiple R-squared: 0.6884, Adjusted R-squared: 0.6754
F-statistic: 53.02 on 1 and 24 DF, p-value: 1.602e-07

## Sheet: Aves G4 GC vs Background
G4 GC vs Genomic GC content Aves
Clade	Rho	P	Lambda
Aves	0.206154	0.312308	4.57023e-05
Call:
lm(formula = pic_y ~ pic_x + 0)
Residuals:
Min 1Q Median 3Q Max
-1.14434 -0.19191 0.08303 0.32791 0.70409
Coefficients:
Estimate Std. Error t value Pr(>|t|)
pic_x 4.7820 0.7499 6.377 1.36e-06 ***
---
Signif. codes: 0 ‘***’ 0.001 ‘**’ 0.01 ‘*’ 0.05 ‘.’ 0.1 ‘ ’ 1
Residual standard error: 0.4162 on 24 degrees of freedom
Multiple R-squared: 0.6289, Adjusted R-squared: 0.6134
F-statistic: 40.66 on 1 and 24 DF, p-value: 1.359e-06

## Sheet: Aves G4 GC vs length
G4 GC content vs G4 length Aves
Clade	Rho	P	Lambda
Aves	-0.0608755	0.767678	4.57023e-05
Call:
lm(formula = pic_y ~ pic_x + 0)
Residuals:
Min 1Q Median 3Q Max
-0.54203 -0.16166 0.06484 0.16587 0.61822
Coefficients:
Estimate Std. Error t value Pr(>|t|)
pic_x 2.201 0.210 10.48 1.94e-10 ***
---
Signif. codes: 0 ‘***’ 0.001 ‘**’ 0.01 ‘*’ 0.05 ‘.’ 0.1 ‘ ’ 1
Residual standard error: 0.2892 on 24 degrees of freedom
Multiple R-squared: 0.8208, Adjusted R-squared: 0.8133
F-statistic: 109.9 on 1 and 24 DF, p-value: 1.94e-10

## Sheet: Reptiles G4 density vs GC 
G4 density vs Genomic GC content Reptiles
Clade	Rho	P	Lambda
Reptiles	0.872549	4.91459e-06	1.09092
Call:
lm(formula = pic_y ~ pic_x + 0)
Residuals:
Min 1Q Median 3Q Max
-18.542 -4.888 -1.145 9.973 16.459
Coefficients:
Estimate Std. Error t value Pr(>|t|)
pic_x 103.23 21.76 4.743 0.000262 ***
---
Signif. codes: 0 ‘***’ 0.001 ‘**’ 0.01 ‘*’ 0.05 ‘.’ 0.1 ‘ ’ 1
Residual standard error: 9.581 on 15 degrees of freedom
Multiple R-squared: 0.6, Adjusted R-squared: 0.5733
F-statistic: 22.5 on 1 and 15 DF, p-value: 0.0002615

[truncated: 6 more sheets: Reptiles G4 GC vs Background, Reptiles G4 GC vs length, Non amniotes G4 density vs GC , Non amniote G4 GC vs Background, Non amniotes G4 GC vs length, Overall deviation stats]
