# Supplementary material for: CGGBP1-regulated heterogeneous C–T transition rates relate with G-quadruplex potential of terrestrial vertebrate genomes
Source: bioRxiv preprint, doi:10.64898/2025.12.10.693595, version 2 (2026-03-24)
Supplement: Table S3 [file 693595_file31.xlsx]

## Sheet: G4 density in TSS
clade	species	bin_id	raw_density	normalized_density
Amphibians	Leptobrachium_leishanense	1	0.0660522	0.151011
Amphibians	Leptobrachium_leishanense	2	0.0666216	0.152313
Amphibians	Leptobrachium_leishanense	3	0.0652692	0.149221
Amphibians	Leptobrachium_leishanense	4	0.0686501	0.15695
Amphibians	Leptobrachium_leishanense	5	0.0658031	0.150441
Amphibians	Leptobrachium_leishanense	6	0.0680095	0.155486
Amphibians	Leptobrachium_leishanense	7	0.0711057	0.162565
Amphibians	Leptobrachium_leishanense	8	0.0712125	0.162809
Amphibians	Leptobrachium_leishanense	9	0.0710701	0.162483
Amphibians	Leptobrachium_leishanense	10	0.070216	0.16053
Amphibians	Leptobrachium_leishanense	11	0.072031	0.16468
Amphibians	Leptobrachium_leishanense	12	0.0727428	0.166307
Amphibians	Leptobrachium_leishanense	13	0.0713549	0.163134
Amphibians	Leptobrachium_leishanense	14	0.0729919	0.166877
Amphibians	Leptobrachium_leishanense	15	0.070821	0.161914
Amphibians	Leptobrachium_leishanense	16	0.0701804	0.160449
Amphibians	Leptobrachium_leishanense	17	0.0713904	0.163215
Amphibians	Leptobrachium_leishanense	18	0.0715328	0.163541
Amphibians	Leptobrachium_leishanense	19	0.0733122	0.167609
Amphibians	Leptobrachium_leishanense	20	0.0753408	0.172247
Amphibians	Leptobrachium_leishanense	21	0.0735969	0.16826
Amphibians	Leptobrachium_leishanense	22	0.0748425	0.171108
Amphibians	Leptobrachium_leishanense	23	0.0718531	0.164273
Amphibians	Leptobrachium_leishanense	24	0.072814	0.16647
Amphibians	Leptobrachium_leishanense	25	0.0730987	0.167121
Amphibians	Leptobrachium_leishanense	26	0.0741308	0.16948
Amphibians	Leptobrachium_leishanense	27	0.0742019	0.169643
Amphibians	Leptobrachium_leishanense	28	0.0747358	0.170864
Amphibians	Leptobrachium_leishanense	29	0.0755543	0.172735
Amphibians	Leptobrachium_leishanense	30	0.0773337	0.176803
Amphibians	Leptobrachium_leishanense	31	0.0766219	0.175176
Amphibians	Leptobrachium_leishanense	32	0.0782946	0.179
Amphibians	Leptobrachium_leishanense	33	0.0779387	0.178186
Amphibians	Leptobrachium_leishanense	34	0.0758746	0.173467
Amphibians	Leptobrachium_leishanense	35	0.0771202	0.176315
Amphibians	Leptobrachium_leishanense	36	0.0770846	0.176234
Amphibians	Leptobrachium_leishanense	37	0.0779031	0.178105
Amphibians	Leptobrachium_leishanense	38	0.0781167	0.178593
Amphibians	Leptobrachium_leishanense	39	0.0765508	0.175013
Amphibians	Leptobrachium_leishanense	40	0.0725293	0.165819
Amphibians	Leptobrachium_leishanense	41	0.0745934	0.170538
Amphibians	Leptobrachium_leishanense	42	0.0799673	0.182824
Amphibians	Leptobrachium_leishanense	43	0.075839	0.173386
Amphibians	Leptobrachium_leishanense	44	0.0807858	0.184695
Amphibians	Leptobrachium_leishanense	45	0.0791843	0.181034
Amphibians	Leptobrachium_leishanense	46	0.0795758	0.181929
Amphibians	Leptobrachium_leishanense	47	0.0767999	0.175583
Amphibians	Leptobrachium_leishanense	48	0.0760881	0.173955
Amphibians	Leptobrachium_leishanense	49	0.0785793	0.179651
Amphibians	Leptobrachium_leishanense	50	0.0760525	0.173874
Amphibians	Leptobrachium_leishanense	51	0.0764084	0.174688
Amphibians	Leptobrachium_leishanense	52	0.075234	0.172003
Amphibians	Leptobrachium_leishanense	53	0.0765152	0.174932
Amphibians	Leptobrachium_leishanense	54	0.0760169	0.173793
Amphibians	Leptobrachium_leishanense	55	0.0748425	0.171108
Amphibians	Leptobrachium_leishanense	56	0.0738816	0.168911
Amphibians	Leptobrachium_leishanense	57	0.0736325	0.168341
Amphibians	Leptobrachium_leishanense	58	0.0732055	0.167365
Amphibians	Leptobrachium_leishanense	59	0.0720666	0.164761
Amphibians	Leptobrachium_leishanense	60	0.0720666	0.164761
Amphibians	Leptobrachium_leishanense	61	0.0735613	0.168179
Amphibians	Leptobrachium_leishanense	62	0.0735613	0.168179
Amphibians	Leptobrachium_leishanense	63	0.0736681	0.168423
Amphibians	Leptobrachium_leishanense	64	0.0715328	0.163541
Amphibians	Leptobrachium_leishanense	65	0.072209	0.165087
Amphibians	Leptobrachium_leishanense	66	0.0712481	0.16289
Amphibians	Leptobrachium_leishanense	67	0.0711413	0.162646
Amphibians	Leptobrachium_leishanense	68	0.069789	0.159554
Amphibians	Leptobrachium_leishanense	69	0.0686145	0.156869
Amphibians	Leptobrachium_leishanense	70	0.0697534	0.159473
Amphibians	Leptobrachium_leishanense	71	0.0706787	0.161588
Amphibians	Leptobrachium_leishanense	72	0.0715328	0.163541
Amphibians	Leptobrachium_leishanense	73	0.0708566	0.161995
Amphibians	Leptobrachium_leishanense	74	0.0713193	0.163053
Amphibians	Leptobrachium_leishanense	75	0.0693619	0.158578
Amphibians	Leptobrachium_leishanense	76	0.0700025	0.160042
Amphibians	Leptobrachium_leishanense	77	0.0654828	0.149709
Amphibians	Leptobrachium_leishanense	78	0.0650201	0.148651
Amphibians	Leptobrachium_leishanense	79	0.0654472	0.149628
Amphibians	Leptobrachium_leishanense	80	0.0658031	0.150441
Amphibians	Xenopus_tropicalis	1	0.0540541	0.132713
Amphibians	Xenopus_tropicalis	2	0.027027	0.0663566
Amphibians	Xenopus_tropicalis	3	0.027027	0.0663566
Amphibians	Xenopus_tropicalis	4	0.027027	0.0663566
Amphibians	Xenopus_tropicalis	5	0	0
Amphibians	Xenopus_tropicalis	6	0.027027	0.0663566
Amphibians	Xenopus_tropicalis	7	0.0810811	0.19907
Amphibians	Xenopus_tropicalis	8	0.108108	0.265426
Amphibians	Xenopus_tropicalis	9	0.135135	0.331783
Amphibians	Xenopus_tropicalis	10	0.0810811	0.19907
Amphibians	Xenopus_tropicalis	11	0.0540541	0.132713
Amphibians	Xenopus_tropicalis	12	0	0
Amphibians	Xenopus_tropicalis	13	0	0
Amphibians	Xenopus_tropicalis	14	0	0
Amphibians	Xenopus_tropicalis	15	0.027027	0.0663566
Amphibians	Xenopus_tropicalis	16	0.0540541	0.132713
Amphibians	Xenopus_tropicalis	17	0.0540541	0.132713
Amphibians	Xenopus_tropicalis	18	0.027027	0.0663566
Amphibians	Xenopus_tropicalis	19	0.027027	0.0663566
Amphibians	Xenopus_tropicalis	20	0	0
Amphibians	Xenopus_tropicalis	21	0.027027	0.0663566
Amphibians	Xenopus_tropicalis	22	0.108108	0.265426
Amphibians	Xenopus_tropicalis	23	0.162162	0.398139
Amphibians	Xenopus_tropicalis	24	0	0
Amphibians	Xenopus_tropicalis	25	0.027027	0.0663566
Amphibians	Xenopus_tropicalis	26	0.027027	0.0663566
Amphibians	Xenopus_tropicalis	27	0	0
Amphibians	Xenopus_tropicalis	28	0	0
Amphibians	Xenopus_tropicalis	29	0	0
Amphibians	Xenopus_tropicalis	30	0	0
Amphibians	Xenopus_tropicalis	31	0.0810811	0.19907
Amphibians	Xenopus_tropicalis	32	0.108108	0.265426
Amphibians	Xenopus_tropicalis	33	0.135135	0.331783
Amphibians	Xenopus_tropicalis	34	0.135135	0.331783
Amphibians	Xenopus_tropicalis	35	0.0810811	0.19907
Amphibians	Xenopus_tropicalis	36	0.0810811	0.19907
Amphibians	Xenopus_tropicalis	37	0.027027	0.0663566
Amphibians	Xenopus_tropicalis	38	0.027027	0.0663566
Amphibians	Xenopus_tropicalis	39	0.027027	0.0663566
Amphibians	Xenopus_tropicalis	40	0	0
Amphibians	Xenopus_tropicalis	41	0	0
Amphibians	Xenopus_tropicalis	42	0	0
Amphibians	Xenopus_tropicalis	43	0	0
Amphibians	Xenopus_tropicalis	44	0	0
Amphibians	Xenopus_tropicalis	45	0.027027	0.0663566
Amphibians	Xenopus_tropicalis	46	0.0540541	0.132713
Amphibians	Xenopus_tropicalis	47	0.027027	0.0663566
Amphibians	Xenopus_tropicalis	48	0.027027	0.0663566
Amphibians	Xenopus_tropicalis	49	0.0540541	0.132713
Amphibians	Xenopus_tropicalis	50	0.027027	0.0663566
Amphibians	Xenopus_tropicalis	51	0.0540541	0.132713
Amphibians	Xenopus_tropicalis	52	0.027027	0.0663566
Amphibians	Xenopus_tropicalis	53	0.027027	0.0663566
Amphibians	Xenopus_tropicalis	54	0	0
Amphibians	Xenopus_tropicalis	55	0	0
Amphibians	Xenopus_tropicalis	56	0.0540541	0.132713
Amphibians	Xenopus_tropicalis	57	0.027027	0.0663566
Amphibians	Xenopus_tropicalis	58	0.027027	0.0663566
Amphibians	Xenopus_tropicalis	59	0	0
Amphibians	Xenopus_tropicalis	60	0.0540541	0.132713
Amphibians	Xenopus_tropicalis	61	0	0
Amphibians	Xenopus_tropicalis	62	0	0
Amphibians	Xenopus_tropicalis	63	0	0
Amphibians	Xenopus_tropicalis	64	0.027027	0.0663566
Amphibians	Xenopus_tropicalis	65	0.0540541	0.132713
Amphibians	Xenopus_tropicalis	66	0.108108	0.265426
Amphibians	Xenopus_tropicalis	67	0.027027	0.0663566
Amphibians	Xenopus_tropicalis	68	0.0540541	0.132713
Amphibians	Xenopus_tropicalis	69	0.0540541	0.132713
Amphibians	Xenopus_tropicalis	70	0	0
Amphibians	Xenopus_tropicalis	71	0.027027	0.0663566
Amphibians	Xenopus_tropicalis	72	0.0540541	0.132713
Amphibians	Xenopus_tropicalis	73	0.027027	0.0663566
Amphibians	Xenopus_tropicalis	74	0	0
Amphibians	Xenopus_tropicalis	75	0	0
Amphibians	Xenopus_tropicalis	76	0.027027	0.0663566
Amphibians	Xenopus_tropicalis	77	0.027027	0.0663566
Amphibians	Xenopus_tropicalis	78	0.027027	0.0663566
Amphibians	Xenopus_tropicalis	79	0.0810811	0.19907
Amphibians	Xenopus_tropicalis	80	0.0540541	0.132713
Aves	Amazona_collaria	1	0.0928814	0.219319
Aves	Amazona_collaria	2	0.0952099	0.224817
Aves	Amazona_collaria	3	0.0938794	0.221675
Aves	Amazona_collaria	4	0.0885201	0.20902
Aves	Amazona_collaria	5	0.0924749	0.218359
Aves	Amazona_collaria	6	0.0964666	0.227784
Aves	Amazona_collaria	7	0.0949882	0.224293
Aves	Amazona_collaria	8	0.0961339	0.226999
Aves	Amazona_collaria	9	0.0985733	0.232759
Aves	Amazona_collaria	10	0.0939163	0.221762
Aves	Amazona_collaria	11	0.0953208	0.225079
Aves	Amazona_collaria	12	0.101161	0.238868
Aves	Amazona_collaria	13	0.104228	0.246112
Aves	Amazona_collaria	14	0.104746	0.247333
Aves	Amazona_collaria	15	0.105004	0.247944
Aves	Amazona_collaria	16	0.104007	0.245588
Aves	Amazona_collaria	17	0.109218	0.257894
Aves	Amazona_collaria	18	0.114097	0.269414
Aves	Amazona_collaria	19	0.112692	0.266097
Aves	Amazona_collaria	20	0.113431	0.267843
Aves	Amazona_collaria	21	0.118828	0.280585
Aves	Amazona_collaria	22	0.1233	0.291145
Aves	Amazona_collaria	23	0.125591	0.296556
Aves	Amazona_collaria	24	0.130581	0.308338
Aves	Amazona_collaria	25	0.136236	0.321691
Aves	Amazona_collaria	26	0.143443	0.338709
Aves	Amazona_collaria	27	0.153127	0.361575
Aves	Amazona_collaria	28	0.160815	0.379728
Aves	Amazona_collaria	29	0.171903	0.40591
Aves	Amazona_collaria	30	0.182621	0.431219
Aves	Amazona_collaria	31	0.194301	0.458797
Aves	Amazona_collaria	32	0.203578	0.480703
Aves	Amazona_collaria	33	0.215442	0.508718
Aves	Amazona_collaria	34	0.222317	0.524951
Aves	Amazona_collaria	35	0.232444	0.548864
Aves	Amazona_collaria	36	0.248965	0.587875
Aves	Amazona_collaria	37	0.254731	0.60149
Aves	Amazona_collaria	38	0.26338	0.621912
Aves	Amazona_collaria	39	0.269737	0.636923
Aves	Amazona_collaria	40	0.269774	0.63701
Aves	Amazona_collaria	41	0.262973	0.620952
Aves	Amazona_collaria	42	0.266928	0.63029
Aves	Amazona_collaria	43	0.263786	0.622872
Aves	Amazona_collaria	44	0.252587	0.596428
Aves	Amazona_collaria	45	0.244715	0.577839
Aves	Amazona_collaria	46	0.232333	0.548602
Aves	Amazona_collaria	47	0.219286	0.517794
Aves	Amazona_collaria	48	0.204576	0.483059
Aves	Amazona_collaria	49	0.195705	0.462114
Aves	Amazona_collaria	50	0.185356	0.437677
Aves	Amazona_collaria	51	0.173085	0.408702
Aves	Amazona_collaria	52	0.160186	0.378244
Aves	Amazona_collaria	53	0.150059	0.354331
Aves	Amazona_collaria	54	0.139784	0.330069
Aves	Amazona_collaria	55	0.130877	0.309036
Aves	Amazona_collaria	56	0.125813	0.297079
Aves	Amazona_collaria	57	0.118938	0.280847
Aves	Amazona_collaria	58	0.112877	0.266534
Aves	Amazona_collaria	59	0.111288	0.262781
Aves	Amazona_collaria	60	0.107481	0.253792
Aves	Amazona_collaria	61	0.100606	0.237559
Aves	Amazona_collaria	62	0.0993495	0.234591
Aves	Amazona_collaria	63	0.0977602	0.230839
Aves	Amazona_collaria	64	0.0939902	0.221937
Aves	Amazona_collaria	65	0.0921422	0.217573
Aves	Amazona_collaria	66	0.0863394	0.203871
Aves	Amazona_collaria	67	0.0865242	0.204308
Aves	Amazona_collaria	68	0.0825695	0.194969
Aves	Amazona_collaria	69	0.0799823	0.18886
Aves	Amazona_collaria	70	0.0799823	0.18886
Aves	Amazona_collaria	71	0.077469	0.182926
Aves	Amazona_collaria	72	0.0830869	0.196191
Aves	Amazona_collaria	73	0.0815346	0.192526
Aves	Amazona_collaria	74	0.0751035	0.17734
Aves	Amazona_collaria	75	0.0794648	0.187638
Aves	Amazona_collaria	76	0.0771733	0.182227
Aves	Amazona_collaria	77	0.073662	0.173936
Aves	Amazona_collaria	78	0.0760645	0.179609
Aves	Amazona_collaria	79	0.0719249	0.169834
Aves	Amazona_collaria	80	0.0708161	0.167216
Aves	Anas_platyrhynchos	1	0.062952	0.151985
Aves	Anas_platyrhynchos	2	0.0648449	0.156555
Aves	Anas_platyrhynchos	3	0.0650391	0.157023
Aves	Anas_platyrhynchos	4	0.0685337	0.16546
Aves	Anas_platyrhynchos	5	0.0691161	0.166867
Aves	Anas_platyrhynchos	6	0.0699898	0.168976
Aves	Anas_platyrhynchos	7	0.0713974	0.172374
Aves	Anas_platyrhynchos	8	0.0693588	0.167453
Aves	Anas_platyrhynchos	9	0.072174	0.174249
Aves	Anas_platyrhynchos	10	0.0713488	0.172257
Aves	Anas_platyrhynchos	11	0.0714459	0.172491
Aves	Anas_platyrhynchos	12	0.0745037	0.179874
Aves	Anas_platyrhynchos	13	0.0759598	0.183389
Aves	Anas_platyrhynchos	14	0.0762996	0.184209
Aves	Anas_platyrhynchos	15	0.077513	0.187139
Aves	Anas_platyrhynchos	16	0.0798913	0.192881
Aves	Anas_platyrhynchos	17	0.0829491	0.200263
Aves	Anas_platyrhynchos	18	0.0871232	0.210341
Aves	Anas_platyrhynchos	19	0.0929962	0.22452
Aves	Anas_platyrhynchos	20	0.0989176	0.238816
Aves	Anas_platyrhynchos	21	0.100228	0.24198
Aves	Anas_platyrhynchos	22	0.100034	0.241511
Aves	Anas_platyrhynchos	23	0.105082	0.253698
Aves	Anas_platyrhynchos	24	0.109887	0.265299
Aves	Anas_platyrhynchos	25	0.116536	0.281353
Aves	Anas_platyrhynchos	26	0.123914	0.299165
Aves	Anas_platyrhynchos	27	0.129787	0.313344
Aves	Anas_platyrhynchos	28	0.134155	0.32389
Aves	Anas_platyrhynchos	29	0.141436	0.341467
Aves	Anas_platyrhynchos	30	0.152065	0.36713
Aves	Anas_platyrhynchos	31	0.161724	0.390449
Aves	Anas_platyrhynchos	32	0.169247	0.408612
Aves	Anas_platyrhynchos	33	0.178421	0.43076
Aves	Anas_platyrhynchos	34	0.192108	0.463805
Aves	Anas_platyrhynchos	35	0.204242	0.4931
Aves	Anas_platyrhynchos	36	0.219046	0.528841
Aves	Anas_platyrhynchos	37	0.234286	0.565636
Aves	Anas_platyrhynchos	38	0.244576	0.590478
Aves	Anas_platyrhynchos	39	0.226715	0.547355
Aves	Anas_platyrhynchos	40	0.18871	0.455602
Aves	Anas_platyrhynchos	41	0.1907	0.460407
Aves	Anas_platyrhynchos	42	0.230161	0.555675
Aves	Anas_platyrhynchos	43	0.236179	0.570206
Aves	Anas_platyrhynchos	44	0.226084	0.545832
Aves	Anas_platyrhynchos	45	0.218803	0.528255
Aves	Anas_platyrhynchos	46	0.211134	0.50974
Aves	Anas_platyrhynchos	47	0.196331	0.474
Aves	Anas_platyrhynchos	48	0.179197	0.432634
Aves	Anas_platyrhynchos	49	0.170897	0.412596
Aves	Anas_platyrhynchos	50	0.16386	0.395605
Aves	Anas_platyrhynchos	51	0.151725	0.36631
Aves	Anas_platyrhynchos	52	0.139688	0.337249
Aves	Anas_platyrhynchos	53	0.134204	0.324007
Aves	Anas_platyrhynchos	54	0.12935	0.312289
Aves	Anas_platyrhynchos	55	0.120419	0.290728
Aves	Anas_platyrhynchos	56	0.117507	0.283697
Aves	Anas_platyrhynchos	57	0.113479	0.273971
Aves	Anas_platyrhynchos	58	0.105907	0.25569
Aves	Anas_platyrhynchos	59	0.099403	0.239988
Aves	Anas_platyrhynchos	60	0.096054	0.231902
Aves	Anas_platyrhynchos	61	0.096782	0.23366
Aves	Anas_platyrhynchos	62	0.0939184	0.226746
Aves	Anas_platyrhynchos	63	0.0896471	0.216434
Aves	Anas_platyrhynchos	64	0.0873659	0.210927
Aves	Anas_platyrhynchos	65	0.0788235	0.190303
Aves	Anas_platyrhynchos	66	0.0778042	0.187842
Aves	Anas_platyrhynchos	67	0.0790176	0.190772
Aves	Anas_platyrhynchos	68	0.0728535	0.17589
Aves	Anas_platyrhynchos	69	0.074261	0.179288
Aves	Anas_platyrhynchos	70	0.0766879	0.185147
Aves	Anas_platyrhynchos	71	0.0747464	0.18046
Aves	Anas_platyrhynchos	72	0.0719798	0.17378
Aves	Anas_platyrhynchos	73	0.0705237	0.170265
Aves	Anas_platyrhynchos	74	0.0658642	0.159015
Aves	Anas_platyrhynchos	75	0.0660098	0.159367
Aves	Anas_platyrhynchos	76	0.0647479	0.15632
Aves	Anas_platyrhynchos	77	0.0647964	0.156437
Aves	Anas_platyrhynchos	78	0.0644566	0.155617
Aves	Anas_platyrhynchos	79	0.0631947	0.15257
Aves	Anas_platyrhynchos	80	0.0645052	0.155734
Aves	Apteryx_haastii	1	0.0891784	0.215459
Aves	Apteryx_haastii	2	0.0879702	0.21254
Aves	Apteryx_haastii	3	0.085162	0.205755
Aves	Apteryx_haastii	4	0.085064	0.205518
Aves	Apteryx_haastii	5	0.0852599	0.205992
Aves	Apteryx_haastii	6	0.0888192	0.214591
Aves	Apteryx_haastii	7	0.0878396	0.212224
Aves	Apteryx_haastii	8	0.0880355	0.212698
Aves	Apteryx_haastii	9	0.08686	0.209857
Aves	Apteryx_haastii	10	0.0884274	0.213644
Aves	Apteryx_haastii	11	0.0866641	0.209384
Aves	Apteryx_haastii	12	0.0869579	0.210094
Aves	Apteryx_haastii	13	0.088558	0.21396
Aves	Apteryx_haastii	14	0.0915622	0.221218
Aves	Apteryx_haastii	15	0.097146	0.234709
Aves	Apteryx_haastii	16	0.0945337	0.228397
Aves	Apteryx_haastii	17	0.0924112	0.223269
Aves	Apteryx_haastii	18	0.097995	0.23676
Aves	Apteryx_haastii	19	0.0982563	0.237391
Aves	Apteryx_haastii	20	0.103644	0.250409
Aves	Apteryx_haastii	21	0.107106	0.258772
Aves	Apteryx_haastii	22	0.106746	0.257904
Aves	Apteryx_haastii	23	0.10753	0.259797
Aves	Apteryx_haastii	24	0.110697	0.26745
Aves	Apteryx_haastii	25	0.10913	0.263663
Aves	Apteryx_haastii	26	0.113179	0.273446
Aves	Apteryx_haastii	27	0.116739	0.282045
Aves	Apteryx_haastii	28	0.119155	0.287883
Aves	Apteryx_haastii	29	0.123694	0.29885
Aves	Apteryx_haastii	30	0.126274	0.305082
Aves	Apteryx_haastii	31	0.134372	0.324648
Aves	Apteryx_haastii	32	0.139205	0.336324
Aves	Apteryx_haastii	33	0.147727	0.356915
Aves	Apteryx_haastii	34	0.15834	0.382556
Aves	Apteryx_haastii	35	0.165981	0.401017
Aves	Apteryx_haastii	36	0.168822	0.407881
Aves	Apteryx_haastii	37	0.17212	0.415849
Aves	Apteryx_haastii	38	0.178683	0.431707
Aves	Apteryx_haastii	39	0.174471	0.421529
Aves	Apteryx_haastii	40	0.154127	0.372379
Aves	Apteryx_haastii	41	0.152201	0.367724
Aves	Apteryx_haastii	42	0.171042	0.413246
Aves	Apteryx_haastii	43	0.175255	0.423423
Aves	Apteryx_haastii	44	0.170879	0.412851
Aves	Apteryx_haastii	45	0.166667	0.402674
Aves	Apteryx_haastii	46	0.162781	0.393285
Aves	Apteryx_haastii	47	0.148184	0.35802
Aves	Apteryx_haastii	48	0.137147	0.331354
Aves	Apteryx_haastii	49	0.127057	0.306976
Aves	Apteryx_haastii	50	0.125784	0.303899
Aves	Apteryx_haastii	51	0.122159	0.295142
Aves	Apteryx_haastii	52	0.114387	0.276365
Aves	Apteryx_haastii	53	0.110534	0.267055
Aves	Apteryx_haastii	54	0.110469	0.266898
Aves	Apteryx_haastii	55	0.107987	0.260902
Aves	Apteryx_haastii	56	0.105081	0.25388
Aves	Apteryx_haastii	57	0.100411	0.242598
Aves	Apteryx_haastii	58	0.0966889	0.233604
Aves	Apteryx_haastii	59	0.0976358	0.235892
Aves	Apteryx_haastii	60	0.0964276	0.232973
Aves	Apteryx_haastii	61	0.091954	0.222165
Aves	Apteryx_haastii	62	0.0890478	0.215143
Aves	Apteryx_haastii	63	0.0869253	0.210015
Aves	Apteryx_haastii	64	0.0840844	0.203151
Aves	Apteryx_haastii	65	0.0823211	0.198891
Aves	Apteryx_haastii	66	0.0818966	0.197866
Aves	Apteryx_haastii	67	0.079023	0.190923
Aves	Apteryx_haastii	68	0.0780107	0.188477
Aves	Apteryx_haastii	69	0.0779127	0.188241
Aves	Apteryx_haastii	70	0.0783373	0.189266
Aves	Apteryx_haastii	71	0.07628	0.184296
Aves	Apteryx_haastii	72	0.0754963	0.182402
Aves	Apteryx_haastii	73	0.0748106	0.180746
Aves	Apteryx_haastii	74	0.0737004	0.178063
Aves	Apteryx_haastii	75	0.0745494	0.180114
Aves	Apteryx_haastii	76	0.073831	0.178379
Aves	Apteryx_haastii	77	0.0745494	0.180114
Aves	Apteryx_haastii	78	0.072884	0.176091
Aves	Apteryx_haastii	79	0.0703696	0.170016
Aves	Apteryx_haastii	80	0.0695859	0.168123
Aves	Aquila_chrysaetos	1	0.122236	0.290277
Aves	Aquila_chrysaetos	2	0.132865	0.315519
Aves	Aquila_chrysaetos	3	0.134575	0.319581
Aves	Aquila_chrysaetos	4	0.134453	0.319291
Aves	Aquila_chrysaetos	5	0.138057	0.327849
Aves	Aquila_chrysaetos	6	0.136591	0.324368
Aves	Aquila_chrysaetos	7	0.138119	0.327995
Aves	Aquila_chrysaetos	8	0.139768	0.331911
Aves	Aquila_chrysaetos	9	0.137019	0.325383
Aves	Aquila_chrysaetos	10	0.139951	0.332347
Aves	Aquila_chrysaetos	11	0.14606	0.346853
Aves	Aquila_chrysaetos	12	0.151008	0.358604
Aves	Aquila_chrysaetos	13	0.15168	0.360199
Aves	Aquila_chrysaetos	14	0.154856	0.367743
Aves	Aquila_chrysaetos	15	0.161087	0.382539
Aves	Aquila_chrysaetos	16	0.166035	0.39429
Aves	Aquila_chrysaetos	17	0.171717	0.407781
Aves	Aquila_chrysaetos	18	0.175076	0.41576
Aves	Aquila_chrysaetos	19	0.178925	0.424899
Aves	Aquila_chrysaetos	20	0.183079	0.434763
Aves	Aquila_chrysaetos	21	0.192547	0.457248
Aves	Aquila_chrysaetos	22	0.205498	0.488003
Aves	Aquila_chrysaetos	23	0.220281	0.523109
Aves	Aquila_chrysaetos	24	0.231399	0.549511
Aves	Aquila_chrysaetos	25	0.239096	0.567789
Aves	Aquila_chrysaetos	26	0.256323	0.608698
Aves	Aquila_chrysaetos	27	0.275993	0.655409
Aves	Aquila_chrysaetos	28	0.303299	0.720253
Aves	Aquila_chrysaetos	29	0.323763	0.768851
Aves	Aquila_chrysaetos	30	0.345999	0.821655
Aves	Aquila_chrysaetos	31	0.372694	0.885049
Aves	Aquila_chrysaetos	32	0.397434	0.9438
Aves	Aquila_chrysaetos	33	0.417349	0.991092
Aves	Aquila_chrysaetos	34	0.432437	1.02692
Aves	Aquila_chrysaetos	35	0.445938	1.05898
Aves	Aquila_chrysaetos	36	0.456995	1.08524
Aves	Aquila_chrysaetos	37	0.464997	1.10424
Aves	Aquila_chrysaetos	38	0.4573	1.08597
Aves	Aquila_chrysaetos	39	0.467379	1.1099
Aves	Aquila_chrysaetos	40	0.478925	1.13732
Aves	Aquila_chrysaetos	41	0.475748	1.12978
Aves	Aquila_chrysaetos	42	0.46347	1.10062
Aves	Aquila_chrysaetos	43	0.454429	1.07915
Aves	Aquila_chrysaetos	44	0.457178	1.08568
Aves	Aquila_chrysaetos	45	0.467074	1.10918
Aves	Aquila_chrysaetos	46	0.446854	1.06116
Aves	Aquila_chrysaetos	47	0.429078	1.01894
Aves	Aquila_chrysaetos	48	0.419609	0.996459
Aves	Aquila_chrysaetos	49	0.401283	0.95294
Aves	Aquila_chrysaetos	50	0.375199	0.890996
Aves	Aquila_chrysaetos	51	0.349603	0.830214
Aves	Aquila_chrysaetos	52	0.324313	0.770156
Aves	Aquila_chrysaetos	53	0.298351	0.708503
Aves	Aquila_chrysaetos	54	0.276298	0.656134
Aves	Aquila_chrysaetos	55	0.260782	0.619287
Aves	Aquila_chrysaetos	56	0.245388	0.582731
Aves	Aquila_chrysaetos	57	0.231093	0.548785
Aves	Aquila_chrysaetos	58	0.216921	0.51513
Aves	Aquila_chrysaetos	59	0.20562	0.488293
Aves	Aquila_chrysaetos	60	0.191936	0.455798
Aves	Aquila_chrysaetos	61	0.184178	0.437374
Aves	Aquila_chrysaetos	62	0.178131	0.423013
Aves	Aquila_chrysaetos	63	0.179108	0.425334
Aves	Aquila_chrysaetos	64	0.173244	0.411408
Aves	Aquila_chrysaetos	65	0.163714	0.388777
Aves	Aquila_chrysaetos	66	0.160843	0.381959
Aves	Aquila_chrysaetos	67	0.156811	0.372385
Aves	Aquila_chrysaetos	68	0.151252	0.359184
Aves	Aquila_chrysaetos	69	0.149664	0.355412
Aves	Aquila_chrysaetos	70	0.149175	0.354252
Aves	Aquila_chrysaetos	71	0.147709	0.35077
Aves	Aquila_chrysaetos	72	0.142395	0.338149
Aves	Aquila_chrysaetos	73	0.139646	0.331621
Aves	Aquila_chrysaetos	74	0.137691	0.326979
Aves	Aquila_chrysaetos	75	0.133476	0.31697
Aves	Aquila_chrysaetos	76	0.133598	0.31726
Aves	Aquila_chrysaetos	77	0.13708	0.325528
Aves	Aquila_chrysaetos	78	0.135858	0.322627
Aves	Aquila_chrysaetos	79	0.134209	0.31871
Aves	Aquila_chrysaetos	80	0.132315	0.314213
Aves	Athene_cunicularia	1	0.0664637	0.162424
Aves	Athene_cunicularia	2	0.0685903	0.16762
Aves	Athene_cunicularia	3	0.0691323	0.168945
Aves	Athene_cunicularia	4	0.0702581	0.171696
Aves	Athene_cunicularia	5	0.0666722	0.162933
Aves	Athene_cunicularia	6	0.0634199	0.154985
Aves	Athene_cunicularia	7	0.0640871	0.156615
Aves	Athene_cunicularia	8	0.0651295	0.159163
Aves	Athene_cunicularia	9	0.0634616	0.155087
Aves	Athene_cunicularia	10	0.0629196	0.153762
Aves	Athene_cunicularia	11	0.0686319	0.167722
Aves	Athene_cunicularia	12	0.0670892	0.163952
Aves	Athene_cunicularia	13	0.0657132	0.160589
Aves	Athene_cunicularia	14	0.0690489	0.168741
Aves	Athene_cunicularia	15	0.0728016	0.177912
Aves	Athene_cunicularia	16	0.0713422	0.174346
Aves	Athene_cunicularia	17	0.0693408	0.169455
Aves	Athene_cunicularia	18	0.0723846	0.176893
Aves	Athene_cunicularia	19	0.0723012	0.176689
Aves	Athene_cunicularia	20	0.0705083	0.172308
Aves	Athene_cunicularia	21	0.0725931	0.177402
Aves	Athene_cunicularia	22	0.0694242	0.169658
Aves	Athene_cunicularia	23	0.0706334	0.172613
Aves	Athene_cunicularia	24	0.0763457	0.186573
Aves	Athene_cunicularia	25	0.0793479	0.19391
Aves	Athene_cunicularia	26	0.0808072	0.197476
Aves	Athene_cunicularia	27	0.0815578	0.19931
Aves	Athene_cunicularia	28	0.0814744	0.199106
Aves	Athene_cunicularia	29	0.0871034	0.212863
Aves	Athene_cunicularia	30	0.0916899	0.224071
Aves	Athene_cunicularia	31	0.0946921	0.231408
Aves	Athene_cunicularia	32	0.0943585	0.230593
Aves	Athene_cunicularia	33	0.0962348	0.235178
Aves	Athene_cunicularia	34	0.101363	0.247711
Aves	Athene_cunicularia	35	0.104783	0.256067
Aves	Athene_cunicularia	36	0.112079	0.273899
Aves	Athene_cunicularia	37	0.121127	0.29601
Aves	Athene_cunicularia	38	0.120335	0.294074
Aves	Athene_cunicularia	39	0.117041	0.286025
Aves	Athene_cunicularia	40	0.127215	0.310887
Aves	Athene_cunicularia	41	0.129175	0.315677
Aves	Athene_cunicularia	42	0.11775	0.287757
Aves	Athene_cunicularia	43	0.114873	0.280726
Aves	Athene_cunicularia	44	0.121294	0.296418
Aves	Athene_cunicularia	45	0.117583	0.287349
Aves	Athene_cunicularia	46	0.1057	0.258309
Aves	Athene_cunicularia	47	0.0990285	0.242005
Aves	Athene_cunicularia	48	0.0992787	0.242616
Aves	Athene_cunicularia	49	0.0944836	0.230898
Aves	Athene_cunicularia	50	0.0861444	0.210519
Aves	Athene_cunicularia	51	0.0897302	0.219282
Aves	Athene_cunicularia	52	0.0853521	0.208583
Aves	Athene_cunicularia	53	0.0844765	0.206443
Aves	Athene_cunicularia	54	0.0803069	0.196253
Aves	Athene_cunicularia	55	0.0763457	0.186573
Aves	Athene_cunicularia	56	0.0765542	0.187083
Aves	Athene_cunicularia	57	0.07301	0.178421
Aves	Athene_cunicularia	58	0.0741358	0.181173
Aves	Athene_cunicularia	59	0.072885	0.178116
Aves	Athene_cunicularia	60	0.0725931	0.177402
Aves	Athene_cunicularia	61	0.0723012	0.176689
Aves	Athene_cunicularia	62	0.0740525	0.180969
Aves	Athene_cunicularia	63	0.0722178	0.176485
Aves	Athene_cunicularia	64	0.0711337	0.173836
Aves	Athene_cunicularia	65	0.0715507	0.174855
Aves	Athene_cunicularia	66	0.0698828	0.170779
Aves	Athene_cunicularia	67	0.0670058	0.163748
Aves	Athene_cunicularia	68	0.0683818	0.167111
Aves	Athene_cunicularia	69	0.0653796	0.159774
Aves	Athene_cunicularia	70	0.0655881	0.160284
Aves	Athene_cunicularia	71	0.0669641	0.163646
Aves	Athene_cunicularia	72	0.0682567	0.166805
Aves	Athene_cunicularia	73	0.0675062	0.164971
Aves	Athene_cunicularia	74	0.0646708	0.158042
Aves	Athene_cunicularia	75	0.0656298	0.160386
Aves	Athene_cunicularia	76	0.0645457	0.157736
Aves	Athene_cunicularia	77	0.0628779	0.15366
Aves	Athene_cunicularia	78	0.0651295	0.159163
Aves	Athene_cunicularia	79	0.0627528	0.153355
Aves	Athene_cunicularia	80	0.0625026	0.152743
Aves	Cairina_moschata	1	0.124142	0.299571
Aves	Cairina_moschata	2	0.121296	0.292704
Aves	Cairina_moschata	3	0.126324	0.304836
Aves	Cairina_moschata	4	0.128601	0.31033
Aves	Cairina_moschata	5	0.127715	0.308194
Aves	Cairina_moschata	6	0.129929	0.313535
Aves	Cairina_moschata	7	0.13151	0.31735
Aves	Cairina_moschata	8	0.133186	0.321394
Aves	Cairina_moschata	9	0.136949	0.330474
Aves	Cairina_moschata	10	0.141312	0.341004
Aves	Cairina_moschata	11	0.139953	0.337723
Aves	Cairina_moschata	12	0.145107	0.350161
Aves	Cairina_moschata	13	0.143526	0.346346
Aves	Cairina_moschata	14	0.148964	0.35947
Aves	Cairina_moschata	15	0.15181	0.366338
Aves	Cairina_moschata	16	0.155668	0.375647
Aves	Cairina_moschata	17	0.157755	0.380683
Aves	Cairina_moschata	18	0.163826	0.395333
Aves	Cairina_moschata	19	0.169486	0.408992
Aves	Cairina_moschata	20	0.176221	0.425245
Aves	Cairina_moschata	21	0.178688	0.431196
Aves	Cairina_moschata	22	0.186435	0.449891
Aves	Cairina_moschata	23	0.197281	0.476063
Aves	Cairina_moschata	24	0.202877	0.489569
Aves	Cairina_moschata	25	0.210055	0.50689
Aves	Cairina_moschata	26	0.214071	0.516581
Aves	Cairina_moschata	27	0.224917	0.542753
Aves	Cairina_moschata	28	0.237945	0.574191
Aves	Cairina_moschata	29	0.246577	0.595022
Aves	Cairina_moschata	30	0.256791	0.619668
Aves	Cairina_moschata	31	0.266561	0.643246
Aves	Cairina_moschata	32	0.281233	0.678652
Aves	Cairina_moschata	33	0.289455	0.698491
Aves	Cairina_moschata	34	0.303589	0.732599
Aves	Cairina_moschata	35	0.320917	0.774414
Aves	Cairina_moschata	36	0.330846	0.798373
Aves	Cairina_moschata	37	0.337708	0.814931
Aves	Cairina_moschata	38	0.347542	0.838662
Aves	Cairina_moschata	39	0.343684	0.829353
Aves	Cairina_moschata	40	0.300775	0.725808
Aves	Cairina_moschata	41	0.296727	0.716041
Aves	Cairina_moschata	42	0.342324	0.826072
Aves	Cairina_moschata	43	0.35219	0.849879
Aves	Cairina_moschata	44	0.342704	0.826987
Aves	Cairina_moschata	45	0.331984	0.80112
Aves	Cairina_moschata	46	0.324395	0.782807
Aves	Cairina_moschata	47	0.315542	0.761442
Aves	Cairina_moschata	48	0.294166	0.70986
Aves	Cairina_moschata	49	0.277818	0.670411
Aves	Cairina_moschata	50	0.26966	0.650724
Aves	Cairina_moschata	51	0.2597	0.626688
Aves	Cairina_moschata	52	0.250372	0.604178
Aves	Cairina_moschata	53	0.241296	0.582279
Aves	Cairina_moschata	54	0.228743	0.551986
Aves	Cairina_moschata	55	0.219921	0.530697
Aves	Cairina_moschata	56	0.212332	0.512384
Aves	Cairina_moschata	57	0.203605	0.491324
Aves	Cairina_moschata	58	0.2	0.482625
Aves	Cairina_moschata	59	0.193897	0.467899
Aves	Cairina_moschata	60	0.182198	0.439666
Aves	Cairina_moschata	61	0.1797	0.433638
Aves	Cairina_moschata	62	0.174356	0.420743
Aves	Cairina_moschata	63	0.166419	0.40159
Aves	Cairina_moschata	64	0.15785	0.380912
Aves	Cairina_moschata	65	0.152474	0.36794
Aves	Cairina_moschata	66	0.154846	0.373663
Aves	Cairina_moschata	67	0.151779	0.366261
Aves	Cairina_moschata	68	0.147731	0.356494
Aves	Cairina_moschata	69	0.144	0.34749
Aves	Cairina_moschata	70	0.140111	0.338105
Aves	Cairina_moschata	71	0.135494	0.326964
Aves	Cairina_moschata	72	0.133534	0.322234
Aves	Cairina_moschata	73	0.131099	0.316358
Aves	Cairina_moschata	74	0.12996	0.313611
Aves	Cairina_moschata	75	0.128601	0.31033
Aves	Cairina_moschata	76	0.123478	0.297969
Aves	Cairina_moschata	77	0.123763	0.298656
Aves	Cairina_moschata	78	0.12547	0.302776
Aves	Cairina_moschata	79	0.127083	0.306667
Aves	Cairina_moschata	80	0.122688	0.296061
Aves	Calidris_pugnax	1	0.123545	0.291036
Aves	Calidris_pugnax	2	0.122011	0.287424
Aves	Calidris_pugnax	3	0.123147	0.2901
Aves	Calidris_pugnax	4	0.125646	0.295986
Aves	Calidris_pugnax	5	0.122494	0.288561
Aves	Calidris_pugnax	6	0.12664	0.298327
Aves	Calidris_pugnax	7	0.126782	0.298661
Aves	Calidris_pugnax	8	0.124226	0.292641
Aves	Calidris_pugnax	9	0.132063	0.311103
Aves	Calidris_pugnax	10	0.131495	0.309765
Aves	Calidris_pugnax	11	0.131268	0.30923
Aves	Calidris_pugnax	12	0.131069	0.308762
Aves	Calidris_pugnax	13	0.133568	0.314648
Aves	Calidris_pugnax	14	0.13618	0.320802
Aves	Calidris_pugnax	15	0.139872	0.329497
Aves	Calidris_pugnax	16	0.141746	0.333912
Aves	Calidris_pugnax	17	0.14291	0.336655
Aves	Calidris_pugnax	18	0.147595	0.347691
Aves	Calidris_pugnax	19	0.152365	0.358929
Aves	Calidris_pugnax	20	0.150605	0.354782
Aves	Calidris_pugnax	21	0.157363	0.370701
Aves	Calidris_pugnax	22	0.166705	0.392708
Aves	Calidris_pugnax	23	0.170197	0.400935
Aves	Calidris_pugnax	24	0.174399	0.410835
Aves	Calidris_pugnax	25	0.176586	0.415985
Aves	Calidris_pugnax	26	0.186098	0.438393
Aves	Calidris_pugnax	27	0.193395	0.455584
Aves	Calidris_pugnax	28	0.201318	0.474246
Aves	Calidris_pugnax	29	0.20958	0.493711
Aves	Calidris_pugnax	30	0.214663	0.505684
Aves	Calidris_pugnax	31	0.227838	0.536721
Aves	Calidris_pugnax	32	0.23576	0.555383
Aves	Calidris_pugnax	33	0.238514	0.561871
Aves	Calidris_pugnax	34	0.25115	0.591637
Aves	Calidris_pugnax	35	0.25115	0.591637
Aves	Calidris_pugnax	36	0.258675	0.609363
Aves	Calidris_pugnax	37	0.272077	0.640935
Aves	Calidris_pugnax	38	0.27733	0.653309
Aves	Calidris_pugnax	39	0.287268	0.676721
Aves	Calidris_pugnax	40	0.286388	0.674647
Aves	Calidris_pugnax	41	0.292294	0.68856
Aves	Calidris_pugnax	42	0.279289	0.657925
Aves	Calidris_pugnax	43	0.269947	0.635918
Aves	Calidris_pugnax	44	0.258589	0.609162
Aves	Calidris_pugnax	45	0.255977	0.603008
Aves	Calidris_pugnax	46	0.252598	0.595049
Aves	Calidris_pugnax	47	0.245329	0.577925
Aves	Calidris_pugnax	48	0.234624	0.552708
Aves	Calidris_pugnax	49	0.223522	0.526554
Aves	Calidris_pugnax	50	0.216594	0.510233
Aves	Calidris_pugnax	51	0.208359	0.490835
Aves	Calidris_pugnax	52	0.199585	0.470166
Aves	Calidris_pugnax	53	0.192884	0.45438
Aves	Calidris_pugnax	54	0.185502	0.436989
Aves	Calidris_pugnax	55	0.181243	0.426955
Aves	Calidris_pugnax	56	0.173377	0.408427
Aves	Calidris_pugnax	57	0.166875	0.393109
Aves	Calidris_pugnax	58	0.158498	0.373377
Aves	Calidris_pugnax	59	0.152025	0.358126
Aves	Calidris_pugnax	60	0.151116	0.355986
Aves	Calidris_pugnax	61	0.147453	0.347357
Aves	Calidris_pugnax	62	0.140837	0.331772
Aves	Calidris_pugnax	63	0.142484	0.335651
Aves	Calidris_pugnax	64	0.139928	0.329631
Aves	Calidris_pugnax	65	0.135073	0.318193
Aves	Calidris_pugnax	66	0.129564	0.305217
Aves	Calidris_pugnax	67	0.127293	0.299865
Aves	Calidris_pugnax	68	0.124595	0.293511
Aves	Calidris_pugnax	69	0.123232	0.2903
Aves	Calidris_pugnax	70	0.122324	0.28816
Aves	Calidris_pugnax	71	0.120563	0.284013
Aves	Calidris_pugnax	72	0.117326	0.276387
Aves	Calidris_pugnax	73	0.11443	0.269564
Aves	Calidris_pugnax	74	0.113976	0.268494
Aves	Calidris_pugnax	75	0.111619	0.262942
Aves	Calidris_pugnax	76	0.119797	0.282207
Aves	Calidris_pugnax	77	0.114231	0.269096
Aves	Calidris_pugnax	78	0.114061	0.268695
Aves	Calidris_pugnax	79	0.11301	0.26622
Aves	Calidris_pugnax	80	0.112471	0.264949
Aves	Catharus_ustulatus	1	0.140444	0.330613
Aves	Catharus_ustulatus	2	0.141703	0.333575
Aves	Catharus_ustulatus	3	0.1422	0.334745
Aves	Catharus_ustulatus	4	0.138027	0.324922
Aves	Catharus_ustulatus	5	0.142067	0.334433
Aves	Catharus_ustulatus	6	0.14614	0.344022
Aves	Catharus_ustulatus	7	0.143988	0.338954
Aves	Catharus_ustulatus	8	0.141206	0.332406
Aves	Catharus_ustulatus	9	0.145014	0.341371
Aves	Catharus_ustulatus	10	0.147531	0.347296
Aves	Catharus_ustulatus	11	0.149982	0.353064
Aves	Catharus_ustulatus	12	0.153227	0.360704
Aves	Catharus_ustulatus	13	0.154088	0.362731
Aves	Catharus_ustulatus	14	0.152565	0.359145
Aves	Catharus_ustulatus	15	0.155115	0.365148
Aves	Catharus_ustulatus	16	0.162003	0.381363
Aves	Catharus_ustulatus	17	0.163162	0.384091
Aves	Catharus_ustulatus	18	0.169884	0.399916
Aves	Catharus_ustulatus	19	0.176309	0.41504
Aves	Catharus_ustulatus	20	0.176607	0.415741
Aves	Catharus_ustulatus	21	0.181276	0.426733
Aves	Catharus_ustulatus	22	0.181872	0.428136
Aves	Catharus_ustulatus	23	0.185548	0.43679
Aves	Catharus_ustulatus	24	0.193032	0.454408
Aves	Catharus_ustulatus	25	0.198099	0.466335
Aves	Catharus_ustulatus	26	0.20108	0.473351
Aves	Catharus_ustulatus	27	0.211312	0.49744
Aves	Catharus_ustulatus	28	0.223665	0.526517
Aves	Catharus_ustulatus	29	0.226446	0.533066
Aves	Catharus_ustulatus	30	0.234096	0.551074
Aves	Catharus_ustulatus	31	0.248833	0.585764
Aves	Catharus_ustulatus	32	0.25688	0.604708
Aves	Catharus_ustulatus	33	0.267709	0.630199
Aves	Catharus_ustulatus	34	0.275855	0.649377
Aves	Catharus_ustulatus	35	0.285922	0.673075
Aves	Catharus_ustulatus	36	0.30248	0.712054
Aves	Catharus_ustulatus	37	0.31821	0.749083
Aves	Catharus_ustulatus	38	0.323078	0.760542
Aves	Catharus_ustulatus	39	0.314733	0.740897
Aves	Catharus_ustulatus	40	0.289532	0.681573
Aves	Catharus_ustulatus	41	0.287909	0.677753
Aves	Catharus_ustulatus	42	0.318045	0.748693
Aves	Catharus_ustulatus	43	0.325496	0.766233
Aves	Catharus_ustulatus	44	0.308839	0.727021
Aves	Catharus_ustulatus	45	0.300328	0.706986
Aves	Catharus_ustulatus	46	0.293175	0.690148
Aves	Catharus_ustulatus	47	0.27761	0.653508
Aves	Catharus_ustulatus	48	0.264	0.621468
Aves	Catharus_ustulatus	49	0.252244	0.593794
Aves	Catharus_ustulatus	50	0.2386	0.561676
Aves	Catharus_ustulatus	51	0.226314	0.532754
Aves	Catharus_ustulatus	52	0.225652	0.531195
Aves	Catharus_ustulatus	53	0.218465	0.514278
Aves	Catharus_ustulatus	54	0.211644	0.498219
Aves	Catharus_ustulatus	55	0.202404	0.476469
Aves	Catharus_ustulatus	56	0.195351	0.459865
Aves	Catharus_ustulatus	57	0.185879	0.437569
Aves	Catharus_ustulatus	58	0.179389	0.42229
Aves	Catharus_ustulatus	59	0.176508	0.415508
Aves	Catharus_ustulatus	60	0.170679	0.401787
Aves	Catharus_ustulatus	61	0.165579	0.389782
Aves	Catharus_ustulatus	62	0.163659	0.38526
Aves	Catharus_ustulatus	63	0.165215	0.388924
Aves	Catharus_ustulatus	64	0.1624	0.382298
Aves	Catharus_ustulatus	65	0.157764	0.371384
Aves	Catharus_ustulatus	66	0.160943	0.378868
Aves	Catharus_ustulatus	67	0.154353	0.363355
Aves	Catharus_ustulatus	68	0.151936	0.357664
Aves	Catharus_ustulatus	69	0.154949	0.364758
Aves	Catharus_ustulatus	70	0.145445	0.342384
Aves	Catharus_ustulatus	71	0.145445	0.342384
Aves	Catharus_ustulatus	72	0.150743	0.354857
Aves	Catharus_ustulatus	73	0.145048	0.341449
Aves	Catharus_ustulatus	74	0.144849	0.340981
Aves	Catharus_ustulatus	75	0.143226	0.337161
Aves	Catharus_ustulatus	76	0.142299	0.334979
Aves	Catharus_ustulatus	77	0.141041	0.332016
Aves	Catharus_ustulatus	78	0.140047	0.329678
Aves	Catharus_ustulatus	79	0.141902	0.334043
Aves	Catharus_ustulatus	80	0.138656	0.326403
Aves	Corvus_moneduloides	1	0.141322	0.331975
Aves	Corvus_moneduloides	2	0.141552	0.332516
Aves	Corvus_moneduloides	3	0.14589	0.342707
Aves	Corvus_moneduloides	4	0.145069	0.340776
Aves	Corvus_moneduloides	5	0.143064	0.336067
Aves	Corvus_moneduloides	6	0.148848	0.349655
Aves	Corvus_moneduloides	7	0.148651	0.349192
Aves	Corvus_moneduloides	8	0.151116	0.354982
Aves	Corvus_moneduloides	9	0.15128	0.355368
Aves	Corvus_moneduloides	10	0.153876	0.361467
Aves	Corvus_moneduloides	11	0.15621	0.366948
Aves	Corvus_moneduloides	12	0.156506	0.367643
Aves	Corvus_moneduloides	13	0.160055	0.375981
Aves	Corvus_moneduloides	14	0.162159	0.380922
Aves	Corvus_moneduloides	15	0.166168	0.390341
Aves	Corvus_moneduloides	16	0.174089	0.408947
Aves	Corvus_moneduloides	17	0.174253	0.409333
Aves	Corvus_moneduloides	18	0.17731	0.416513
Aves	Corvus_moneduloides	19	0.181648	0.426704
Aves	Corvus_moneduloides	20	0.188911	0.443766
Aves	Corvus_moneduloides	21	0.193907	0.455501
Aves	Corvus_moneduloides	22	0.197916	0.46492
Aves	Corvus_moneduloides	23	0.201301	0.472872
Aves	Corvus_moneduloides	24	0.208861	0.490628
Aves	Corvus_moneduloides	25	0.216058	0.507536
Aves	Corvus_moneduloides	26	0.224767	0.527995
Aves	Corvus_moneduloides	27	0.2342	0.550152
Aves	Corvus_moneduloides	28	0.245867	0.57756
Aves	Corvus_moneduloides	29	0.252802	0.59385
Aves	Corvus_moneduloides	30	0.267854	0.629209
Aves	Corvus_moneduloides	31	0.280179	0.65816
Aves	Corvus_moneduloides	32	0.291024	0.683637
Aves	Corvus_moneduloides	33	0.30348	0.712897
Aves	Corvus_moneduloides	34	0.315049	0.740073
Aves	Corvus_moneduloides	35	0.330036	0.775278
Aves	Corvus_moneduloides	36	0.352056	0.827004
Aves	Corvus_moneduloides	37	0.359516	0.84453
Aves	Corvus_moneduloides	38	0.370329	0.869929
Aves	Corvus_moneduloides	39	0.377691	0.887223
Aves	Corvus_moneduloides	40	0.359418	0.844298
Aves	Corvus_moneduloides	41	0.361127	0.848312
Aves	Corvus_moneduloides	42	0.377724	0.8873
Aves	Corvus_moneduloides	43	0.372169	0.874253
Aves	Corvus_moneduloides	44	0.353929	0.831405
Aves	Corvus_moneduloides	45	0.337595	0.793035
Aves	Corvus_moneduloides	46	0.331712	0.779215
Aves	Corvus_moneduloides	47	0.320932	0.753893
Aves	Corvus_moneduloides	48	0.304204	0.714596
Aves	Corvus_moneduloides	49	0.29694	0.697534
Aves	Corvus_moneduloides	50	0.285043	0.669586
Aves	Corvus_moneduloides	51	0.272587	0.640326
Aves	Corvus_moneduloides	52	0.262924	0.617628
Aves	Corvus_moneduloides	53	0.251389	0.59053
Aves	Corvus_moneduloides	54	0.243402	0.571769
Aves	Corvus_moneduloides	55	0.226805	0.532782
Aves	Corvus_moneduloides	56	0.220824	0.518731
Aves	Corvus_moneduloides	57	0.215105	0.505297
Aves	Corvus_moneduloides	58	0.201992	0.474493
Aves	Corvus_moneduloides	59	0.197818	0.464688
Aves	Corvus_moneduloides	60	0.194498	0.456891
Aves	Corvus_moneduloides	61	0.187958	0.441527
Aves	Corvus_moneduloides	62	0.182075	0.427708
Aves	Corvus_moneduloides	63	0.17731	0.416513
Aves	Corvus_moneduloides	64	0.17491	0.410877
Aves	Corvus_moneduloides	65	0.173694	0.408021
Aves	Corvus_moneduloides	66	0.16883	0.396595
Aves	Corvus_moneduloides	67	0.159102	0.373742
Aves	Corvus_moneduloides	68	0.157689	0.370423
Aves	Corvus_moneduloides	69	0.160252	0.376444
Aves	Corvus_moneduloides	70	0.154797	0.363629
Aves	Corvus_moneduloides	71	0.15174	0.356449
Aves	Corvus_moneduloides	72	0.152365	0.357916
Aves	Corvus_moneduloides	73	0.1499	0.352125
Aves	Corvus_moneduloides	74	0.148125	0.347956
Aves	Corvus_moneduloides	75	0.146219	0.343479
Aves	Corvus_moneduloides	76	0.140237	0.329428
Aves	Corvus_moneduloides	77	0.143852	0.33792
Aves	Corvus_moneduloides	78	0.142439	0.3346
Aves	Corvus_moneduloides	79	0.140796	0.33074
Aves	Corvus_moneduloides	80	0.135998	0.319468
Aves	Coturnix_japonica	1	0.0804371	0.194857
Aves	Coturnix_japonica	2	0.0816512	0.197799
Aves	Coturnix_japonica	3	0.082916	0.200862
Aves	Coturnix_japonica	4	0.0865584	0.209686
Aves	Coturnix_japonica	5	0.0846866	0.205152
Aves	Coturnix_japonica	6	0.0862549	0.208951
Aves	Coturnix_japonica	7	0.0847878	0.205397
Aves	Coturnix_japonica	8	0.0865078	0.209564
Aves	Coturnix_japonica	9	0.0870137	0.210789
Aves	Coturnix_japonica	10	0.090302	0.218755
Aves	Coturnix_japonica	11	0.0950574	0.230275
Aves	Coturnix_japonica	12	0.0958668	0.232236
Aves	Coturnix_japonica	13	0.0938939	0.227456
Aves	Coturnix_japonica	14	0.0938433	0.227334
Aves	Coturnix_japonica	15	0.0964233	0.233584
Aves	Coturnix_japonica	16	0.100319	0.24302
Aves	Coturnix_japonica	17	0.102039	0.247187
Aves	Coturnix_japonica	18	0.106946	0.259074
Aves	Coturnix_japonica	19	0.11246	0.272433
Aves	Coturnix_japonica	20	0.111904	0.271084
Aves	Coturnix_japonica	21	0.114585	0.27758
Aves	Coturnix_japonica	22	0.117924	0.285668
Aves	Coturnix_japonica	23	0.119897	0.290448
Aves	Coturnix_japonica	24	0.126069	0.305399
Aves	Coturnix_japonica	25	0.129256	0.31312
Aves	Coturnix_japonica	26	0.130875	0.317041
Aves	Coturnix_japonica	27	0.136996	0.33187
Aves	Coturnix_japonica	28	0.142106	0.344248
Aves	Coturnix_japonica	29	0.148176	0.358954
Aves	Coturnix_japonica	30	0.15192	0.368023
Aves	Coturnix_japonica	31	0.163353	0.39572
Aves	Coturnix_japonica	32	0.172105	0.416921
Aves	Coturnix_japonica	33	0.182577	0.442289
Aves	Coturnix_japonica	34	0.195983	0.474766
Aves	Coturnix_japonica	35	0.204229	0.494741
Aves	Coturnix_japonica	36	0.217585	0.527095
Aves	Coturnix_japonica	37	0.230536	0.558468
Aves	Coturnix_japonica	38	0.239035	0.579057
Aves	Coturnix_japonica	39	0.237416	0.575135
Aves	Coturnix_japonica	40	0.20003	0.48457
Aves	Coturnix_japonica	41	0.189963	0.460182
Aves	Coturnix_japonica	42	0.234836	0.568885
Aves	Coturnix_japonica	43	0.244397	0.592048
Aves	Coturnix_japonica	44	0.235949	0.571581
Aves	Coturnix_japonica	45	0.221278	0.536041
Aves	Coturnix_japonica	46	0.206152	0.499398
Aves	Coturnix_japonica	47	0.191228	0.463246
Aves	Coturnix_japonica	48	0.179795	0.435549
Aves	Coturnix_japonica	49	0.174027	0.421578
Aves	Coturnix_japonica	50	0.161633	0.391553
Aves	Coturnix_japonica	51	0.152325	0.369003
Aves	Coturnix_japonica	52	0.147417	0.357116
Aves	Coturnix_japonica	53	0.147569	0.357483
Aves	Coturnix_japonica	54	0.140689	0.340816
Aves	Coturnix_japonica	55	0.133809	0.324149
Aves	Coturnix_japonica	56	0.130571	0.316306
Aves	Coturnix_japonica	57	0.126929	0.307482
Aves	Coturnix_japonica	58	0.121162	0.293511
Aves	Coturnix_japonica	59	0.116052	0.281134
Aves	Coturnix_japonica	60	0.11241	0.27231
Aves	Coturnix_japonica	61	0.108615	0.263119
Aves	Coturnix_japonica	62	0.10983	0.26606
Aves	Coturnix_japonica	63	0.108059	0.261771
Aves	Coturnix_japonica	64	0.102393	0.248045
Aves	Coturnix_japonica	65	0.100875	0.244368
Aves	Coturnix_japonica	66	0.098194	0.237873
Aves	Coturnix_japonica	67	0.101027	0.244736
Aves	Coturnix_japonica	68	0.0948045	0.229662
Aves	Coturnix_japonica	69	0.0898467	0.217652
Aves	Coturnix_japonica	70	0.0925785	0.22427
Aves	Coturnix_japonica	71	0.0891385	0.215936
Aves	Coturnix_japonica	72	0.0889361	0.215446
Aves	Coturnix_japonica	73	0.0880255	0.21324
Aves	Coturnix_japonica	74	0.0886832	0.214833
Aves	Coturnix_japonica	75	0.0888349	0.215201
Aves	Coturnix_japonica	76	0.0865078	0.209564
Aves	Coturnix_japonica	77	0.0864066	0.209318
Aves	Coturnix_japonica	78	0.0832701	0.20172
Aves	Coturnix_japonica	79	0.0814489	0.197308
Aves	Coturnix_japonica	80	0.0786159	0.190445
Aves	Ficedula_albicollis	1	0.250321	0.56608
Aves	Ficedula_albicollis	2	0.250199	0.565804
Aves	Ficedula_albicollis	3	0.249771	0.564837
Aves	Ficedula_albicollis	4	0.258689	0.585005
Aves	Ficedula_albicollis	5	0.263454	0.595779
Aves	Ficedula_albicollis	6	0.265592	0.600614
Aves	Ficedula_albicollis	7	0.266508	0.602686
Aves	Ficedula_albicollis	8	0.273227	0.617881
Aves	Ficedula_albicollis	9	0.277136	0.626722
Aves	Ficedula_albicollis	10	0.281107	0.635701
Aves	Ficedula_albicollis	11	0.284039	0.642331
Aves	Ficedula_albicollis	12	0.289903	0.655592
Aves	Ficedula_albicollis	13	0.292591	0.66167
Aves	Ficedula_albicollis	14	0.295706	0.668715
Aves	Ficedula_albicollis	15	0.299065	0.676313
Aves	Ficedula_albicollis	16	0.314214	0.71057
Aves	Ficedula_albicollis	17	0.321117	0.72618
Aves	Ficedula_albicollis	18	0.320872	0.725627
Aves	Ficedula_albicollis	19	0.326736	0.738888
Aves	Ficedula_albicollis	20	0.337121	0.762371
Aves	Ficedula_albicollis	21	0.342557	0.774665
Aves	Ficedula_albicollis	22	0.357034	0.807403
Aves	Ficedula_albicollis	23	0.366257	0.828262
Aves	Ficedula_albicollis	24	0.378596	0.856165
Aves	Ficedula_albicollis	25	0.384888	0.870393
Aves	Ficedula_albicollis	26	0.395761	0.894981
Aves	Ficedula_albicollis	27	0.410482	0.928272
Aves	Ficedula_albicollis	28	0.418178	0.945677
Aves	Ficedula_albicollis	29	0.427708	0.967226
Aves	Ficedula_albicollis	30	0.445605	1.0077
Aves	Ficedula_albicollis	31	0.455989	1.03118
Aves	Ficedula_albicollis	32	0.467106	1.05632
Aves	Ficedula_albicollis	33	0.485004	1.0968
Aves	Ficedula_albicollis	34	0.49661	1.12304
Aves	Ficedula_albicollis	35	0.508888	1.15081
Aves	Ficedula_albicollis	36	0.505956	1.14418
Aves	Ficedula_albicollis	37	0.505711	1.14363
Aves	Ficedula_albicollis	38	0.537047	1.21449
Aves	Ficedula_albicollis	39	0.613218	1.38674
Aves	Ficedula_albicollis	40	0.659337	1.49104
Aves	Ficedula_albicollis	41	0.657382	1.48662
Aves	Ficedula_albicollis	42	0.617922	1.39738
Aves	Ficedula_albicollis	43	0.531366	1.20164
Aves	Ficedula_albicollis	44	0.506261	1.14487
Aves	Ficedula_albicollis	45	0.502657	1.13672
Aves	Ficedula_albicollis	46	0.500886	1.13271
Aves	Ficedula_albicollis	47	0.491051	1.11047
Aves	Ficedula_albicollis	48	0.478835	1.08285
Aves	Ficedula_albicollis	49	0.468817	1.06019
Aves	Ficedula_albicollis	50	0.45037	1.01847
Aves	Ficedula_albicollis	51	0.444628	1.00549
Aves	Ficedula_albicollis	52	0.437847	0.990157
Aves	Ficedula_albicollis	53	0.426364	0.964187
Aves	Ficedula_albicollis	54	0.415613	0.939876
Aves	Ficedula_albicollis	55	0.407794	0.922194
Aves	Ficedula_albicollis	56	0.390874	0.883931
Aves	Ficedula_albicollis	57	0.386843	0.874814
Aves	Ficedula_albicollis	58	0.373587	0.844838
Aves	Ficedula_albicollis	59	0.363936	0.823013
Aves	Ficedula_albicollis	60	0.356851	0.806989
Aves	Ficedula_albicollis	61	0.346955	0.784611
Aves	Ficedula_albicollis	62	0.339625	0.768035
Aves	Ficedula_albicollis	63	0.330279	0.7469
Aves	Ficedula_albicollis	64	0.326858	0.739164
Aves	Ficedula_albicollis	65	0.31849	0.72024
Aves	Ficedula_albicollis	66	0.315008	0.712366
Aves	Ficedula_albicollis	67	0.31006	0.701177
Aves	Ficedula_albicollis	68	0.304991	0.689712
Aves	Ficedula_albicollis	69	0.298149	0.674241
Aves	Ficedula_albicollis	70	0.294362	0.665676
Aves	Ficedula_albicollis	71	0.285994	0.646752
Aves	Ficedula_albicollis	72	0.283428	0.64095
Aves	Ficedula_albicollis	73	0.276281	0.624788
Aves	Ficedula_albicollis	74	0.271578	0.614151
Aves	Ficedula_albicollis	75	0.270967	0.61277
Aves	Ficedula_albicollis	76	0.267119	0.604068
Aves	Ficedula_albicollis	77	0.261743	0.591912
Aves	Ficedula_albicollis	78	0.257712	0.582795
Aves	Ficedula_albicollis	79	0.255818	0.578512
Aves	Ficedula_albicollis	80	0.250015	0.56539
Aves	Gallus_gallus	1	0.0810811	0.192135
Aves	Gallus_gallus	2	0.027027	0.0640451
Aves	Gallus_gallus	3	0.027027	0.0640451
Aves	Gallus_gallus	4	0.027027	0.0640451
Aves	Gallus_gallus	5	0.0540541	0.12809
Aves	Gallus_gallus	6	0.0810811	0.192135
Aves	Gallus_gallus	7	0.135135	0.320225
Aves	Gallus_gallus	8	0.108108	0.25618
Aves	Gallus_gallus	9	0.108108	0.25618
Aves	Gallus_gallus	10	0.108108	0.25618
Aves	Gallus_gallus	11	0.0540541	0.12809
Aves	Gallus_gallus	12	0.108108	0.25618
Aves	Gallus_gallus	13	0.135135	0.320225
Aves	Gallus_gallus	14	0.108108	0.25618
Aves	Gallus_gallus	15	0.162162	0.384271
Aves	Gallus_gallus	16	0.216216	0.512361
Aves	Gallus_gallus	17	0.216216	0.512361
Aves	Gallus_gallus	18	0.162162	0.384271
Aves	Gallus_gallus	19	0.162162	0.384271
Aves	Gallus_gallus	20	0.0810811	0.192135
Aves	Gallus_gallus	21	0.027027	0.0640451
Aves	Gallus_gallus	22	0.0810811	0.192135
Aves	Gallus_gallus	23	0.27027	0.640451
Aves	Gallus_gallus	24	0.135135	0.320225
Aves	Gallus_gallus	25	0	0
Aves	Gallus_gallus	26	0.027027	0.0640451
Aves	Gallus_gallus	27	0.027027	0.0640451
Aves	Gallus_gallus	28	0	0
Aves	Gallus_gallus	29	0.0540541	0.12809
Aves	Gallus_gallus	30	0.162162	0.384271
Aves	Gallus_gallus	31	0.216216	0.512361
Aves	Gallus_gallus	32	0.216216	0.512361
Aves	Gallus_gallus	33	0.216216	0.512361
Aves	Gallus_gallus	34	0.108108	0.25618
Aves	Gallus_gallus	35	0.135135	0.320225
Aves	Gallus_gallus	36	0.0810811	0.192135
Aves	Gallus_gallus	37	0.0540541	0.12809
Aves	Gallus_gallus	38	0.0540541	0.12809
Aves	Gallus_gallus	39	0.027027	0.0640451
Aves	Gallus_gallus	40	0.135135	0.320225
Aves	Gallus_gallus	41	0.189189	0.448316
Aves	Gallus_gallus	42	0.189189	0.448316
Aves	Gallus_gallus	43	0.108108	0.25618
Aves	Gallus_gallus	44	0.162162	0.384271
Aves	Gallus_gallus	45	0.0810811	0.192135
Aves	Gallus_gallus	46	0.108108	0.25618
Aves	Gallus_gallus	47	0.135135	0.320225
Aves	Gallus_gallus	48	0.135135	0.320225
Aves	Gallus_gallus	49	0.108108	0.25618
Aves	Gallus_gallus	50	0.108108	0.25618
Aves	Gallus_gallus	51	0.108108	0.25618
Aves	Gallus_gallus	52	0.0540541	0.12809
Aves	Gallus_gallus	53	0.0810811	0.192135
Aves	Gallus_gallus	54	0.108108	0.25618
Aves	Gallus_gallus	55	0.162162	0.384271
Aves	Gallus_gallus	56	0.216216	0.512361
Aves	Gallus_gallus	57	0.162162	0.384271
Aves	Gallus_gallus	58	0.0540541	0.12809
Aves	Gallus_gallus	59	0.0540541	0.12809
Aves	Gallus_gallus	60	0	0
Aves	Gallus_gallus	61	0.0540541	0.12809
Aves	Gallus_gallus	62	0.135135	0.320225
Aves	Gallus_gallus	63	0.027027	0.0640451
Aves	Gallus_gallus	64	0.0810811	0.192135
Aves	Gallus_gallus	65	0.162162	0.384271
Aves	Gallus_gallus	66	0.189189	0.448316
Aves	Gallus_gallus	67	0.108108	0.25618
Aves	Gallus_gallus	68	0.108108	0.25618
Aves	Gallus_gallus	69	0.135135	0.320225
Aves	Gallus_gallus	70	0.108108	0.25618
Aves	Gallus_gallus	71	0.162162	0.384271
Aves	Gallus_gallus	72	0.135135	0.320225
Aves	Gallus_gallus	73	0.0810811	0.192135
Aves	Gallus_gallus	74	0.108108	0.25618
Aves	Gallus_gallus	75	0.0810811	0.192135
Aves	Gallus_gallus	76	0.027027	0.0640451
Aves	Gallus_gallus	77	0	0
Aves	Gallus_gallus	78	0	0
Aves	Gallus_gallus	79	0.0810811	0.192135
Aves	Gallus_gallus	80	0.0540541	0.12809
Aves	Geospiza_fortis	1	0.0873401	0.209952
Aves	Geospiza_fortis	2	0.0851852	0.204772
Aves	Geospiza_fortis	3	0.0827609	0.198945
Aves	Geospiza_fortis	4	0.0842424	0.202506
Aves	Geospiza_fortis	5	0.0842424	0.202506
Aves	Geospiza_fortis	6	0.0861953	0.2072
Aves	Geospiza_fortis	7	0.0839731	0.201858
Aves	Geospiza_fortis	8	0.083165	0.199916
Aves	Geospiza_fortis	9	0.0830976	0.199754
Aves	Geospiza_fortis	10	0.0818182	0.196678
Aves	Geospiza_fortis	11	0.0857912	0.206229
Aves	Geospiza_fortis	12	0.0851178	0.20461
Aves	Geospiza_fortis	13	0.0832997	0.20024
Aves	Geospiza_fortis	14	0.08633	0.207524
Aves	Geospiza_fortis	15	0.0859933	0.206715
Aves	Geospiza_fortis	16	0.0898316	0.215941
Aves	Geospiza_fortis	17	0.0923906	0.222093
Aves	Geospiza_fortis	18	0.0918519	0.220798
Aves	Geospiza_fortis	19	0.090101	0.216589
Aves	Geospiza_fortis	20	0.0890909	0.214161
Aves	Geospiza_fortis	21	0.0907071	0.218046
Aves	Geospiza_fortis	22	0.0884175	0.212542
Aves	Geospiza_fortis	23	0.0923232	0.221931
Aves	Geospiza_fortis	24	0.0977778	0.235043
Aves	Geospiza_fortis	25	0.0989899	0.237956
Aves	Geospiza_fortis	26	0.0938047	0.225492
Aves	Geospiza_fortis	27	0.0958923	0.23051
Aves	Geospiza_fortis	28	0.100202	0.24087
Aves	Geospiza_fortis	29	0.099596	0.239413
Aves	Geospiza_fortis	30	0.0990572	0.238118
Aves	Geospiza_fortis	31	0.100135	0.240708
Aves	Geospiza_fortis	32	0.101549	0.244108
Aves	Geospiza_fortis	33	0.105522	0.253658
Aves	Geospiza_fortis	34	0.105253	0.253011
Aves	Geospiza_fortis	35	0.107677	0.258838
Aves	Geospiza_fortis	36	0.118047	0.283767
Aves	Geospiza_fortis	37	0.120606	0.289918
Aves	Geospiza_fortis	38	0.125051	0.300602
Aves	Geospiza_fortis	39	0.137508	0.330549
Aves	Geospiza_fortis	40	0.152189	0.365838
Aves	Geospiza_fortis	41	0.151852	0.365028
Aves	Geospiza_fortis	42	0.135286	0.325207
Aves	Geospiza_fortis	43	0.127542	0.306592
Aves	Geospiza_fortis	44	0.121549	0.292185
Aves	Geospiza_fortis	45	0.118182	0.284091
Aves	Geospiza_fortis	46	0.116296	0.279558
Aves	Geospiza_fortis	47	0.108754	0.261428
Aves	Geospiza_fortis	48	0.102761	0.247021
Aves	Geospiza_fortis	49	0.0990572	0.238118
Aves	Geospiza_fortis	50	0.0961616	0.231158
Aves	Geospiza_fortis	51	0.0967677	0.232615
Aves	Geospiza_fortis	52	0.0967677	0.232615
Aves	Geospiza_fortis	53	0.096633	0.232291
Aves	Geospiza_fortis	54	0.0934007	0.224521
Aves	Geospiza_fortis	55	0.0921886	0.221607
Aves	Geospiza_fortis	56	0.0916498	0.220312
Aves	Geospiza_fortis	57	0.0944108	0.226949
Aves	Geospiza_fortis	58	0.096229	0.23132
Aves	Geospiza_fortis	59	0.090101	0.216589
Aves	Geospiza_fortis	60	0.0882828	0.212218
Aves	Geospiza_fortis	61	0.0913805	0.219665
Aves	Geospiza_fortis	62	0.090303	0.217075
Aves	Geospiza_fortis	63	0.0903704	0.217236
Aves	Geospiza_fortis	64	0.0882155	0.212056
Aves	Geospiza_fortis	65	0.0874074	0.210114
Aves	Geospiza_fortis	66	0.0884175	0.212542
Aves	Geospiza_fortis	67	0.086734	0.208495
Aves	Geospiza_fortis	68	0.0876094	0.2106
Aves	Geospiza_fortis	69	0.0845118	0.203153
Aves	Geospiza_fortis	70	0.0838384	0.201535
Aves	Geospiza_fortis	71	0.0828956	0.199268
Aves	Geospiza_fortis	72	0.0834343	0.200563
Aves	Geospiza_fortis	73	0.0783838	0.188423
Aves	Geospiza_fortis	74	0.0821549	0.197488
Aves	Geospiza_fortis	75	0.0793939	0.190851
Aves	Geospiza_fortis	76	0.0761616	0.183081
Aves	Geospiza_fortis	77	0.0779798	0.187451
Aves	Geospiza_fortis	78	0.0739394	0.177739
Aves	Geospiza_fortis	79	0.0775084	0.186318
Aves	Geospiza_fortis	80	0.077037	0.185185
Aves	Manacus_vitellinus	1	0.0994399	0.23648
Aves	Manacus_vitellinus	2	0.0997674	0.237259
Aves	Manacus_vitellinus	3	0.0986866	0.234689
Aves	Manacus_vitellinus	4	0.0986211	0.234533
Aves	Manacus_vitellinus	5	0.098097	0.233287
Aves	Manacus_vitellinus	6	0.0942976	0.224251
Aves	Manacus_vitellinus	7	0.0943304	0.224329
Aves	Manacus_vitellinus	8	0.0995054	0.236636
Aves	Manacus_vitellinus	9	0.0997019	0.237103
Aves	Manacus_vitellinus	10	0.0996692	0.237025
Aves	Manacus_vitellinus	11	0.0993744	0.236324
Aves	Manacus_vitellinus	12	0.101012	0.240219
Aves	Manacus_vitellinus	13	0.0981953	0.23352
Aves	Manacus_vitellinus	14	0.10396	0.247229
Aves	Manacus_vitellinus	15	0.103141	0.245282
Aves	Manacus_vitellinus	16	0.10527	0.250345
Aves	Manacus_vitellinus	17	0.105532	0.250968
Aves	Manacus_vitellinus	18	0.105925	0.251903
Aves	Manacus_vitellinus	19	0.105401	0.250657
Aves	Manacus_vitellinus	20	0.107628	0.255953
Aves	Manacus_vitellinus	21	0.111919	0.266157
Aves	Manacus_vitellinus	22	0.11264	0.267871
Aves	Manacus_vitellinus	23	0.112902	0.268494
Aves	Manacus_vitellinus	24	0.112967	0.26865
Aves	Manacus_vitellinus	25	0.115031	0.273557
Aves	Manacus_vitellinus	26	0.118503	0.281813
Aves	Manacus_vitellinus	27	0.126298	0.300352
Aves	Manacus_vitellinus	28	0.131735	0.313282
Aves	Manacus_vitellinus	29	0.136779	0.325277
Aves	Manacus_vitellinus	30	0.142871	0.339765
Aves	Manacus_vitellinus	31	0.149618	0.355811
Aves	Manacus_vitellinus	32	0.160263	0.381126
Aves	Manacus_vitellinus	33	0.169238	0.402468
Aves	Manacus_vitellinus	34	0.17497	0.416099
Aves	Manacus_vitellinus	35	0.186302	0.44305
Aves	Manacus_vitellinus	36	0.190757	0.453643
Aves	Manacus_vitellinus	37	0.202876	0.482463
Aves	Manacus_vitellinus	38	0.213553	0.507856
Aves	Manacus_vitellinus	39	0.223445	0.531379
Aves	Manacus_vitellinus	40	0.228162	0.542596
Aves	Manacus_vitellinus	41	0.225214	0.535586
Aves	Manacus_vitellinus	42	0.220235	0.523746
Aves	Manacus_vitellinus	43	0.206741	0.491654
Aves	Manacus_vitellinus	44	0.202909	0.482541
Aves	Manacus_vitellinus	45	0.194458	0.462445
Aves	Manacus_vitellinus	46	0.18175	0.432223
Aves	Manacus_vitellinus	47	0.165766	0.394212
Aves	Manacus_vitellinus	48	0.158724	0.377465
Aves	Manacus_vitellinus	49	0.148505	0.353162
Aves	Manacus_vitellinus	50	0.143854	0.342102
Aves	Manacus_vitellinus	51	0.138286	0.32886
Aves	Manacus_vitellinus	52	0.126167	0.30004
Aves	Manacus_vitellinus	53	0.120075	0.285552
Aves	Manacus_vitellinus	54	0.113688	0.270363
Aves	Manacus_vitellinus	55	0.109626	0.260705
Aves	Manacus_vitellinus	56	0.10753	0.25572
Aves	Manacus_vitellinus	57	0.1036	0.246372
Aves	Manacus_vitellinus	58	0.0995709	0.236792
Aves	Manacus_vitellinus	59	0.0997347	0.237181
Aves	Manacus_vitellinus	60	0.1017	0.241855
Aves	Manacus_vitellinus	61	0.0966231	0.229781
Aves	Manacus_vitellinus	62	0.0920704	0.218954
Aves	Manacus_vitellinus	63	0.0916773	0.21802
Aves	Manacus_vitellinus	64	0.0946251	0.22503
Aves	Manacus_vitellinus	65	0.0920376	0.218877
Aves	Manacus_vitellinus	66	0.0893518	0.212489
Aves	Manacus_vitellinus	67	0.0902362	0.214593
Aves	Manacus_vitellinus	68	0.0892208	0.212178
Aves	Manacus_vitellinus	69	0.088402	0.210231
Aves	Manacus_vitellinus	70	0.0883037	0.209997
Aves	Manacus_vitellinus	71	0.0898759	0.213736
Aves	Manacus_vitellinus	72	0.0856834	0.203766
Aves	Manacus_vitellinus	73	0.0837509	0.19917
Aves	Manacus_vitellinus	74	0.0851921	0.202597
Aves	Manacus_vitellinus	75	0.0855196	0.203376
Aves	Manacus_vitellinus	76	0.0842095	0.20026
Aves	Manacus_vitellinus	77	0.0837837	0.199248
Aves	Manacus_vitellinus	78	0.0791982	0.188343
Aves	Manacus_vitellinus	79	0.0800825	0.190446
Aves	Manacus_vitellinus	80	0.0815565	0.193951
Aves	Meleagris_gallopavo	1	0.0567463	0.137201
Aves	Meleagris_gallopavo	2	0.0568077	0.137349
Aves	Meleagris_gallopavo	3	0.0560707	0.135568
Aves	Meleagris_gallopavo	4	0.0557023	0.134677
Aves	Meleagris_gallopavo	5	0.0535528	0.12948
Aves	Meleagris_gallopavo	6	0.0564392	0.136458
Aves	Meleagris_gallopavo	7	0.060554	0.146407
Aves	Meleagris_gallopavo	8	0.0592028	0.14314
Aves	Meleagris_gallopavo	9	0.0570534	0.137943
Aves	Meleagris_gallopavo	10	0.0613523	0.148337
Aves	Meleagris_gallopavo	11	0.059817	0.144625
Aves	Meleagris_gallopavo	12	0.0580974	0.140468
Aves	Meleagris_gallopavo	13	0.0584659	0.141359
Aves	Meleagris_gallopavo	14	0.0616594	0.14908
Aves	Meleagris_gallopavo	15	0.0617822	0.149377
Aves	Meleagris_gallopavo	16	0.0627034	0.151604
Aves	Meleagris_gallopavo	17	0.0613523	0.148337
Aves	Meleagris_gallopavo	18	0.0638703	0.154425
Aves	Meleagris_gallopavo	19	0.0652828	0.15784
Aves	Meleagris_gallopavo	20	0.0673709	0.162889
Aves	Meleagris_gallopavo	21	0.0684763	0.165562
Aves	Meleagris_gallopavo	22	0.0692747	0.167492
Aves	Meleagris_gallopavo	23	0.0693361	0.167641
Aves	Meleagris_gallopavo	24	0.0712399	0.172244
Aves	Meleagris_gallopavo	25	0.0705644	0.17061
Aves	Meleagris_gallopavo	26	0.0732666	0.177144
Aves	Meleagris_gallopavo	27	0.0735737	0.177886
Aves	Meleagris_gallopavo	28	0.073328	0.177292
Aves	Meleagris_gallopavo	29	0.079408	0.191992
Aves	Meleagris_gallopavo	30	0.082233	0.198823
Aves	Meleagris_gallopavo	31	0.0846896	0.204762
Aves	Meleagris_gallopavo	32	0.0881901	0.213226
Aves	Meleagris_gallopavo	33	0.0923663	0.223323
Aves	Meleagris_gallopavo	34	0.0917521	0.221838
Aves	Meleagris_gallopavo	35	0.0981392	0.23728
Aves	Meleagris_gallopavo	36	0.103851	0.25109
Aves	Meleagris_gallopavo	37	0.108948	0.263414
Aves	Meleagris_gallopavo	38	0.117669	0.284499
Aves	Meleagris_gallopavo	39	0.112633	0.272323
Aves	Meleagris_gallopavo	40	0.0994289	0.240399
Aves	Meleagris_gallopavo	41	0.10035	0.242626
Aves	Meleagris_gallopavo	42	0.110668	0.267571
Aves	Meleagris_gallopavo	43	0.112326	0.271581
Aves	Meleagris_gallopavo	44	0.110483	0.267126
Aves	Meleagris_gallopavo	45	0.104772	0.253317
Aves	Meleagris_gallopavo	46	0.0988147	0.238914
Aves	Meleagris_gallopavo	47	0.0961739	0.232529
Aves	Meleagris_gallopavo	48	0.0930418	0.224956
Aves	Meleagris_gallopavo	49	0.0859792	0.20788
Aves	Meleagris_gallopavo	50	0.0842597	0.203723
Aves	Meleagris_gallopavo	51	0.0812504	0.196447
Aves	Meleagris_gallopavo	52	0.0773199	0.186944
Aves	Meleagris_gallopavo	53	0.0757846	0.183232
Aves	Meleagris_gallopavo	54	0.073328	0.177292
Aves	Meleagris_gallopavo	55	0.0749248	0.181153
Aves	Meleagris_gallopavo	56	0.071547	0.172986
Aves	Meleagris_gallopavo	57	0.07081	0.171204
Aves	Meleagris_gallopavo	58	0.0702573	0.169868
Aves	Meleagris_gallopavo	59	0.0701959	0.169719
Aves	Meleagris_gallopavo	60	0.0700731	0.169422
Aves	Meleagris_gallopavo	61	0.0691519	0.167195
Aves	Meleagris_gallopavo	62	0.0654056	0.158137
Aves	Meleagris_gallopavo	63	0.0641774	0.155168
Aves	Meleagris_gallopavo	64	0.062642	0.151456
Aves	Meleagris_gallopavo	65	0.0612295	0.14804
Aves	Meleagris_gallopavo	66	0.0592643	0.143289
Aves	Meleagris_gallopavo	67	0.0604925	0.146259
Aves	Meleagris_gallopavo	68	0.0594485	0.143734
Aves	Meleagris_gallopavo	69	0.0603697	0.145962
Aves	Meleagris_gallopavo	70	0.0589572	0.142546
Aves	Meleagris_gallopavo	71	0.058773	0.142101
Aves	Meleagris_gallopavo	72	0.0575447	0.139131
Aves	Meleagris_gallopavo	73	0.0559479	0.135271
Aves	Meleagris_gallopavo	74	0.0575447	0.139131
Aves	Meleagris_gallopavo	75	0.0576061	0.13928
Aves	Meleagris_gallopavo	76	0.0577903	0.139725
Aves	Meleagris_gallopavo	77	0.0600012	0.145071
Aves	Meleagris_gallopavo	78	0.0592643	0.143289
Aves	Meleagris_gallopavo	79	0.0554566	0.134083
Aves	Meleagris_gallopavo	80	0.0520789	0.125916
Aves	Nothoprocta_perdicaria	1	0.097292	0.231482
Aves	Nothoprocta_perdicaria	2	0.0971586	0.231165
Aves	Nothoprocta_perdicaria	3	0.0993375	0.236349
Aves	Nothoprocta_perdicaria	4	0.0970252	0.230848
Aves	Nothoprocta_perdicaria	5	0.0958691	0.228097
Aves	Nothoprocta_perdicaria	6	0.0955134	0.22725
Aves	Nothoprocta_perdicaria	7	0.0964472	0.229472
Aves	Nothoprocta_perdicaria	8	0.0959136	0.228203
Aves	Nothoprocta_perdicaria	9	0.0980479	0.233281
Aves	Nothoprocta_perdicaria	10	0.100138	0.238253
Aves	Nothoprocta_perdicaria	11	0.100271	0.238571
Aves	Nothoprocta_perdicaria	12	0.102539	0.243966
Aves	Nothoprocta_perdicaria	13	0.107164	0.254969
Aves	Nothoprocta_perdicaria	14	0.105163	0.250208
Aves	Nothoprocta_perdicaria	15	0.10325	0.245659
Aves	Nothoprocta_perdicaria	16	0.102228	0.243226
Aves	Nothoprocta_perdicaria	17	0.104718	0.24915
Aves	Nothoprocta_perdicaria	18	0.10992	0.261528
Aves	Nothoprocta_perdicaria	19	0.106674	0.253805
Aves	Nothoprocta_perdicaria	20	0.106808	0.254123
Aves	Nothoprocta_perdicaria	21	0.113433	0.269886
Aves	Nothoprocta_perdicaria	22	0.114856	0.273272
Aves	Nothoprocta_perdicaria	23	0.113656	0.270415
Aves	Nothoprocta_perdicaria	24	0.116412	0.276975
Aves	Nothoprocta_perdicaria	25	0.120281	0.286179
Aves	Nothoprocta_perdicaria	26	0.119836	0.285121
Aves	Nothoprocta_perdicaria	27	0.125839	0.299404
Aves	Nothoprocta_perdicaria	28	0.131442	0.312734
Aves	Nothoprocta_perdicaria	29	0.134466	0.319928
Aves	Nothoprocta_perdicaria	30	0.139046	0.330825
Aves	Nothoprocta_perdicaria	31	0.14367	0.341828
Aves	Nothoprocta_perdicaria	32	0.150385	0.357803
Aves	Nothoprocta_perdicaria	33	0.163369	0.388696
Aves	Nothoprocta_perdicaria	34	0.169905	0.404248
Aves	Nothoprocta_perdicaria	35	0.177731	0.422868
Aves	Nothoprocta_perdicaria	36	0.188892	0.449423
Aves	Nothoprocta_perdicaria	37	0.199653	0.475025
Aves	Nothoprocta_perdicaria	38	0.213438	0.507822
Aves	Nothoprocta_perdicaria	39	0.204989	0.487721
Aves	Nothoprocta_perdicaria	40	0.16746	0.398429
Aves	Nothoprocta_perdicaria	41	0.167549	0.39864
Aves	Nothoprocta_perdicaria	42	0.199609	0.47492
Aves	Nothoprocta_perdicaria	43	0.203522	0.48423
Aves	Nothoprocta_perdicaria	44	0.194762	0.463388
Aves	Nothoprocta_perdicaria	45	0.189204	0.450163
Aves	Nothoprocta_perdicaria	46	0.180844	0.430274
Aves	Nothoprocta_perdicaria	47	0.171551	0.408162
Aves	Nothoprocta_perdicaria	48	0.160834	0.382665
Aves	Nothoprocta_perdicaria	49	0.151541	0.360554
Aves	Nothoprocta_perdicaria	50	0.148072	0.352302
Aves	Nothoprocta_perdicaria	51	0.139713	0.332412
Aves	Nothoprocta_perdicaria	52	0.131442	0.312734
Aves	Nothoprocta_perdicaria	53	0.129352	0.307761
Aves	Nothoprocta_perdicaria	54	0.124728	0.296759
Aves	Nothoprocta_perdicaria	55	0.120014	0.285544
Aves	Nothoprocta_perdicaria	56	0.116279	0.276657
Aves	Nothoprocta_perdicaria	57	0.113033	0.268934
Aves	Nothoprocta_perdicaria	58	0.110587	0.263115
Aves	Nothoprocta_perdicaria	59	0.10832	0.25772
Aves	Nothoprocta_perdicaria	60	0.108853	0.258989
Aves	Nothoprocta_perdicaria	61	0.103784	0.246929
Aves	Nothoprocta_perdicaria	62	0.104229	0.247987
Aves	Nothoprocta_perdicaria	63	0.102005	0.242697
Aves	Nothoprocta_perdicaria	64	0.105429	0.250843
Aves	Nothoprocta_perdicaria	65	0.102761	0.244495
Aves	Nothoprocta_perdicaria	66	0.100316	0.238676
Aves	Nothoprocta_perdicaria	67	0.0997821	0.237407
Aves	Nothoprocta_perdicaria	68	0.0956912	0.227674
Aves	Nothoprocta_perdicaria	69	0.0948908	0.225769
Aves	Nothoprocta_perdicaria	70	0.0963582	0.229261
Aves	Nothoprocta_perdicaria	71	0.0942683	0.224288
Aves	Nothoprocta_perdicaria	72	0.0925786	0.220268
Aves	Nothoprocta_perdicaria	73	0.0908889	0.216248
Aves	Nothoprocta_perdicaria	74	0.088043	0.209477
Aves	Nothoprocta_perdicaria	75	0.0891547	0.212122
Aves	Nothoprocta_perdicaria	76	0.090133	0.214449
Aves	Nothoprocta_perdicaria	77	0.0883543	0.210217
Aves	Nothoprocta_perdicaria	78	0.0859087	0.204398
Aves	Nothoprocta_perdicaria	79	0.0859087	0.204398
Aves	Nothoprocta_perdicaria	80	0.0876873	0.20863
Aves	Numida_meleagris	1	0.0896877	0.214924
Aves	Numida_meleagris	2	0.0894882	0.214446
Aves	Numida_meleagris	3	0.0897126	0.214983
Aves	Numida_meleagris	4	0.0872448	0.20907
Aves	Numida_meleagris	5	0.0878181	0.210444
Aves	Numida_meleagris	6	0.0906847	0.217313
Aves	Numida_meleagris	7	0.0924296	0.221494
Aves	Numida_meleagris	8	0.0932024	0.223346
Aves	Numida_meleagris	9	0.0931027	0.223107
Aves	Numida_meleagris	10	0.0941247	0.225556
Aves	Numida_meleagris	11	0.0956702	0.22926
Aves	Numida_meleagris	12	0.0959194	0.229857
Aves	Numida_meleagris	13	0.0985368	0.236129
Aves	Numida_meleagris	14	0.096742	0.231828
Aves	Numida_meleagris	15	0.101304	0.24276
Aves	Numida_meleagris	16	0.102675	0.246045
Aves	Numida_meleagris	17	0.103273	0.247479
Aves	Numida_meleagris	18	0.105616	0.253094
Aves	Numida_meleagris	19	0.110701	0.26528
Aves	Numida_meleagris	20	0.112845	0.270417
Aves	Numida_meleagris	21	0.113668	0.272388
Aves	Numida_meleagris	22	0.115662	0.277167
Aves	Numida_meleagris	23	0.11783	0.282364
Aves	Numida_meleagris	24	0.124262	0.297775
Aves	Numida_meleagris	25	0.125907	0.301718
Aves	Numida_meleagris	26	0.130618	0.313007
Aves	Numida_meleagris	27	0.134631	0.322624
Aves	Numida_meleagris	28	0.138944	0.332959
Aves	Numida_meleagris	29	0.144303	0.345801
Aves	Numida_meleagris	30	0.152005	0.364259
Aves	Numida_meleagris	31	0.158362	0.379491
Aves	Numida_meleagris	32	0.164893	0.395142
Aves	Numida_meleagris	33	0.176085	0.421963
Aves	Numida_meleagris	34	0.188897	0.452666
Aves	Numida_meleagris	35	0.192661	0.461686
Aves	Numida_meleagris	36	0.199541	0.478172
Aves	Numida_meleagris	37	0.207792	0.497944
Aves	Numida_meleagris	38	0.212304	0.508756
Aves	Numida_meleagris	39	0.209737	0.502604
Aves	Numida_meleagris	40	0.180522	0.432595
Aves	Numida_meleagris	41	0.179575	0.430325
Aves	Numida_meleagris	42	0.206247	0.494241
Aves	Numida_meleagris	43	0.212628	0.509533
Aves	Numida_meleagris	44	0.205723	0.492986
Aves	Numida_meleagris	45	0.195952	0.469571
Aves	Numida_meleagris	46	0.186953	0.448007
Aves	Numida_meleagris	47	0.174963	0.419274
Aves	Numida_meleagris	48	0.167036	0.400279
Aves	Numida_meleagris	49	0.159832	0.383016
Aves	Numida_meleagris	50	0.151806	0.363781
Aves	Numida_meleagris	51	0.147095	0.352492
Aves	Numida_meleagris	52	0.142807	0.342217
Aves	Numida_meleagris	53	0.135429	0.324536
Aves	Numida_meleagris	54	0.130443	0.312589
Aves	Numida_meleagris	55	0.123564	0.296103
Aves	Numida_meleagris	56	0.120722	0.289293
Aves	Numida_meleagris	57	0.116734	0.279735
Aves	Numida_meleagris	58	0.108931	0.261039
Aves	Numida_meleagris	59	0.108931	0.261039
Aves	Numida_meleagris	60	0.104993	0.251601
Aves	Numida_meleagris	61	0.0979385	0.234696
Aves	Numida_meleagris	62	0.0979385	0.234696
Aves	Numida_meleagris	63	0.0942493	0.225855
Aves	Numida_meleagris	64	0.0958197	0.229618
Aves	Numida_meleagris	65	0.0909091	0.217851
Aves	Numida_meleagris	66	0.0865967	0.207517
Aves	Numida_meleagris	67	0.0855747	0.205068
Aves	Numida_meleagris	68	0.0841788	0.201722
Aves	Numida_meleagris	69	0.081038	0.194196
Aves	Numida_meleagris	70	0.0785203	0.188163
Aves	Numida_meleagris	71	0.0810629	0.194256
Aves	Numida_meleagris	72	0.0791435	0.189656
Aves	Numida_meleagris	73	0.0772241	0.185057
Aves	Numida_meleagris	74	0.0760027	0.18213
Aves	Numida_meleagris	75	0.0774983	0.185714
Aves	Numida_meleagris	76	0.0770995	0.184758
Aves	Numida_meleagris	77	0.0742329	0.177888
Aves	Numida_meleagris	78	0.0745071	0.178546
Aves	Numida_meleagris	79	0.0729865	0.174902
Aves	Numida_meleagris	80	0.0736595	0.176515
Aves	Parus_major	1	0.0915218	0.221227
Aves	Parus_major	2	0.0923713	0.223281
Aves	Parus_major	3	0.09475	0.229031
Aves	Parus_major	4	0.0942686	0.227867
Aves	Parus_major	5	0.0931925	0.225266
Aves	Parus_major	6	0.0924562	0.223486
Aves	Parus_major	7	0.0953446	0.230468
Aves	Parus_major	8	0.0968454	0.234096
Aves	Parus_major	9	0.101206	0.244637
Aves	Parus_major	10	0.0995639	0.240667
Aves	Parus_major	11	0.102764	0.248402
Aves	Parus_major	12	0.104038	0.251482
Aves	Parus_major	13	0.105794	0.255726
Aves	Parus_major	14	0.106926	0.258464
Aves	Parus_major	15	0.11007	0.266062
Aves	Parus_major	16	0.110183	0.266335
Aves	Parus_major	17	0.113864	0.275234
Aves	Parus_major	18	0.116894	0.282558
Aves	Parus_major	19	0.121623	0.293989
Aves	Parus_major	20	0.12437	0.300628
Aves	Parus_major	21	0.12791	0.309184
Aves	Parus_major	22	0.129779	0.313702
Aves	Parus_major	23	0.129495	0.313018
Aves	Parus_major	24	0.132667	0.320684
Aves	Parus_major	25	0.142776	0.34512
Aves	Parus_major	26	0.153905	0.372021
Aves	Parus_major	27	0.15903	0.38441
Aves	Parus_major	28	0.166308	0.402001
Aves	Parus_major	29	0.174322	0.421372
Aves	Parus_major	30	0.182732	0.441702
Aves	Parus_major	31	0.194739	0.470724
Aves	Parus_major	32	0.202469	0.489411
Aves	Parus_major	33	0.212267	0.513094
Aves	Parus_major	34	0.22249	0.537804
Aves	Parus_major	35	0.23696	0.572782
Aves	Parus_major	36	0.25211	0.609402
Aves	Parus_major	37	0.256754	0.620628
Aves	Parus_major	38	0.268052	0.647939
Aves	Parus_major	39	0.276576	0.668542
Aves	Parus_major	40	0.273461	0.661013
Aves	Parus_major	41	0.270601	0.654099
Aves	Parus_major	42	0.280087	0.67703
Aves	Parus_major	43	0.271988	0.657453
Aves	Parus_major	44	0.260973	0.630827
Aves	Parus_major	45	0.246474	0.595781
Aves	Parus_major	46	0.233222	0.563747
Aves	Parus_major	47	0.224274	0.542117
Aves	Parus_major	48	0.216175	0.52254
Aves	Parus_major	49	0.206915	0.500157
Aves	Parus_major	50	0.193578	0.467918
Aves	Parus_major	51	0.182024	0.439991
Aves	Parus_major	52	0.168687	0.407751
Aves	Parus_major	53	0.160022	0.386806
Aves	Parus_major	54	0.153848	0.371884
Aves	Parus_major	55	0.144957	0.350391
Aves	Parus_major	56	0.143597	0.347105
Aves	Parus_major	57	0.137821	0.333142
Aves	Parus_major	58	0.129807	0.313771
Aves	Parus_major	59	0.124681	0.301381
Aves	Parus_major	60	0.12049	0.291251
Aves	Parus_major	61	0.121227	0.29303
Aves	Parus_major	62	0.118905	0.287418
Aves	Parus_major	63	0.111316	0.269073
Aves	Parus_major	64	0.105199	0.254288
Aves	Parus_major	65	0.10435	0.252235
Aves	Parus_major	66	0.0996772	0.240941
Aves	Parus_major	67	0.0980065	0.236902
Aves	Parus_major	68	0.0937305	0.226566
Aves	Parus_major	69	0.0943535	0.228072
Aves	Parus_major	70	0.0915784	0.221364
Aves	Parus_major	71	0.0917483	0.221775
Aves	Parus_major	72	0.0881803	0.21315
Aves	Parus_major	73	0.0871609	0.210686
Aves	Parus_major	74	0.0903324	0.218353
Aves	Parus_major	75	0.0890865	0.215341
Aves	Parus_major	76	0.0882086	0.213219
Aves	Parus_major	77	0.0856318	0.20699
Aves	Parus_major	78	0.0828283	0.200214
Aves	Parus_major	79	0.0805629	0.194738
Aves	Parus_major	80	0.0815541	0.197133
Aves	Pavo_cristatus	1	0.0961276	0.227091
Aves	Pavo_cristatus	2	0.0936536	0.221246
Aves	Pavo_cristatus	3	0.0983865	0.232427
Aves	Pavo_cristatus	4	0.102044	0.241067
Aves	Pavo_cristatus	5	0.0965221	0.228023
Aves	Pavo_cristatus	6	0.0978128	0.231072
Aves	Pavo_cristatus	7	0.0958767	0.226498
Aves	Pavo_cristatus	8	0.0931875	0.220145
Aves	Pavo_cristatus	9	0.0940122	0.222094
Aves	Pavo_cristatus	10	0.0966655	0.228362
Aves	Pavo_cristatus	11	0.097526	0.230395
Aves	Pavo_cristatus	12	0.0990678	0.234037
Aves	Pavo_cristatus	13	0.0991036	0.234121
Aves	Pavo_cristatus	14	0.0996056	0.235307
Aves	Pavo_cristatus	15	0.0970957	0.229378
Aves	Pavo_cristatus	16	0.103801	0.245218
Aves	Pavo_cristatus	17	0.105486	0.249199
Aves	Pavo_cristatus	18	0.103263	0.243947
Aves	Pavo_cristatus	19	0.107637	0.254281
Aves	Pavo_cristatus	20	0.110936	0.262074
Aves	Pavo_cristatus	21	0.112621	0.266055
Aves	Pavo_cristatus	22	0.119147	0.281471
Aves	Pavo_cristatus	23	0.120473	0.284605
Aves	Pavo_cristatus	24	0.119577	0.282487
Aves	Pavo_cristatus	25	0.126318	0.298412
Aves	Pavo_cristatus	26	0.136178	0.321705
Aves	Pavo_cristatus	27	0.141413	0.334072
Aves	Pavo_cristatus	28	0.144317	0.340933
Aves	Pavo_cristatus	29	0.152707	0.360754
Aves	Pavo_cristatus	30	0.153998	0.363803
Aves	Pavo_cristatus	31	0.159771	0.37744
Aves	Pavo_cristatus	32	0.172643	0.407849
Aves	Pavo_cristatus	33	0.182037	0.430042
Aves	Pavo_cristatus	34	0.191287	0.451895
Aves	Pavo_cristatus	35	0.197526	0.466634
Aves	Pavo_cristatus	36	0.205486	0.485438
Aves	Pavo_cristatus	37	0.214952	0.5078
Aves	Pavo_cristatus	38	0.219935	0.519573
Aves	Pavo_cristatus	39	0.217569	0.513983
Aves	Pavo_cristatus	40	0.191466	0.452319
Aves	Pavo_cristatus	41	0.190893	0.450963
Aves	Pavo_cristatus	42	0.212693	0.502463
Aves	Pavo_cristatus	43	0.216565	0.511611
Aves	Pavo_cristatus	44	0.207243	0.489588
Aves	Pavo_cristatus	45	0.203263	0.480186
Aves	Pavo_cristatus	46	0.195124	0.460958
Aves	Pavo_cristatus	47	0.183686	0.433938
Aves	Pavo_cristatus	48	0.169416	0.400226
Aves	Pavo_cristatus	49	0.162316	0.383454
Aves	Pavo_cristatus	50	0.153532	0.362702
Aves	Pavo_cristatus	51	0.145895	0.34466
Aves	Pavo_cristatus	52	0.138329	0.326788
Aves	Pavo_cristatus	53	0.133309	0.314929
Aves	Pavo_cristatus	54	0.128648	0.303917
Aves	Pavo_cristatus	55	0.12517	0.295701
Aves	Pavo_cristatus	56	0.12284	0.290195
Aves	Pavo_cristatus	57	0.121657	0.2874
Aves	Pavo_cristatus	58	0.115131	0.271984
Aves	Pavo_cristatus	59	0.110362	0.260718
Aves	Pavo_cristatus	60	0.107565	0.254112
Aves	Pavo_cristatus	61	0.101362	0.239458
Aves	Pavo_cristatus	62	0.0998566	0.2359
Aves	Pavo_cristatus	63	0.10147	0.239712
Aves	Pavo_cristatus	64	0.0951237	0.224719
Aves	Pavo_cristatus	65	0.0962711	0.22743
Aves	Pavo_cristatus	66	0.0971674	0.229547
Aves	Pavo_cristatus	67	0.0914306	0.215995
Aves	Pavo_cristatus	68	0.0872356	0.206084
Aves	Pavo_cristatus	69	0.0849767	0.200748
Aves	Pavo_cristatus	70	0.0827895	0.195581
Aves	Pavo_cristatus	71	0.0800645	0.189144
Aves	Pavo_cristatus	72	0.083901	0.198207
Aves	Pavo_cristatus	73	0.0867336	0.204899
Aves	Pavo_cristatus	74	0.084654	0.199986
Aves	Pavo_cristatus	75	0.0828612	0.195751
Aves	Pavo_cristatus	76	0.081929	0.193548
Aves	Pavo_cristatus	77	0.0825385	0.194988
Aves	Pavo_cristatus	78	0.082933	0.19592
Aves	Pavo_cristatus	79	0.0807458	0.190753
Aves	Pavo_cristatus	80	0.0780925	0.184485
Aves	Phasianus_colchicus	1	0.126304	0.30649
Aves	Phasianus_colchicus	2	0.12769	0.309853
Aves	Phasianus_colchicus	3	0.124664	0.302509
Aves	Phasianus_colchicus	4	0.117056	0.284049
Aves	Phasianus_colchicus	5	0.112503	0.273
Aves	Phasianus_colchicus	6	0.114511	0.277872
Aves	Phasianus_colchicus	7	0.117933	0.286176
Aves	Phasianus_colchicus	8	0.119941	0.291049
Aves	Phasianus_colchicus	9	0.120818	0.293176
Aves	Phasianus_colchicus	10	0.120281	0.291872
Aves	Phasianus_colchicus	11	0.123137	0.298804
Aves	Phasianus_colchicus	12	0.124551	0.302235
Aves	Phasianus_colchicus	13	0.123561	0.299833
Aves	Phasianus_colchicus	14	0.120337	0.292009
Aves	Phasianus_colchicus	15	0.123533	0.299764
Aves	Phasianus_colchicus	16	0.131282	0.318568
Aves	Phasianus_colchicus	17	0.133771	0.324608
Aves	Phasianus_colchicus	18	0.134732	0.326941
Aves	Phasianus_colchicus	19	0.137391	0.333392
Aves	Phasianus_colchicus	20	0.136316	0.330784
Aves	Phasianus_colchicus	21	0.139823	0.339294
Aves	Phasianus_colchicus	22	0.141944	0.344441
Aves	Phasianus_colchicus	23	0.144405	0.350411
Aves	Phasianus_colchicus	24	0.146271	0.354941
Aves	Phasianus_colchicus	25	0.153398	0.372235
Aves	Phasianus_colchicus	26	0.152719	0.370588
Aves	Phasianus_colchicus	27	0.157301	0.381705
Aves	Phasianus_colchicus	28	0.16406	0.398107
Aves	Phasianus_colchicus	29	0.166294	0.403529
Aves	Phasianus_colchicus	30	0.169999	0.412519
Aves	Phasianus_colchicus	31	0.175288	0.425352
Aves	Phasianus_colchicus	32	0.183744	0.445872
Aves	Phasianus_colchicus	33	0.192087	0.466117
Aves	Phasianus_colchicus	34	0.201901	0.489931
Aves	Phasianus_colchicus	35	0.211346	0.512852
Aves	Phasianus_colchicus	36	0.224497	0.544764
Aves	Phasianus_colchicus	37	0.230295	0.558833
Aves	Phasianus_colchicus	38	0.235159	0.570637
Aves	Phasianus_colchicus	39	0.236149	0.573039
Aves	Phasianus_colchicus	40	0.209706	0.508872
Aves	Phasianus_colchicus	41	0.197856	0.480117
Aves	Phasianus_colchicus	42	0.218756	0.530833
Aves	Phasianus_colchicus	43	0.22577	0.547852
Aves	Phasianus_colchicus	44	0.218784	0.530901
Aves	Phasianus_colchicus	45	0.208405	0.505715
Aves	Phasianus_colchicus	46	0.193755	0.470166
Aves	Phasianus_colchicus	47	0.184762	0.448343
Aves	Phasianus_colchicus	48	0.175967	0.427
Aves	Phasianus_colchicus	49	0.167143	0.405588
Aves	Phasianus_colchicus	50	0.158347	0.384245
Aves	Phasianus_colchicus	51	0.148364	0.360019
Aves	Phasianus_colchicus	52	0.14415	0.349794
Aves	Phasianus_colchicus	53	0.1379	0.334627
Aves	Phasianus_colchicus	54	0.134195	0.325637
Aves	Phasianus_colchicus	55	0.129727	0.314794
Aves	Phasianus_colchicus	56	0.123222	0.299009
Aves	Phasianus_colchicus	57	0.116943	0.283774
Aves	Phasianus_colchicus	58	0.111881	0.27149
Aves	Phasianus_colchicus	59	0.112277	0.272451
Aves	Phasianus_colchicus	60	0.109703	0.266206
Aves	Phasianus_colchicus	61	0.104386	0.253304
Aves	Phasianus_colchicus	62	0.100201	0.243147
Aves	Phasianus_colchicus	63	0.0952516	0.231137
Aves	Phasianus_colchicus	64	0.0906417	0.219951
Aves	Phasianus_colchicus	65	0.0903589	0.219264
Aves	Phasianus_colchicus	66	0.0916881	0.22249
Aves	Phasianus_colchicus	67	0.0895387	0.217274
Aves	Phasianus_colchicus	68	0.0855228	0.207529
Aves	Phasianus_colchicus	69	0.0850986	0.2065
Aves	Phasianus_colchicus	70	0.0849572	0.206157
Aves	Phasianus_colchicus	71	0.0822987	0.199706
Aves	Phasianus_colchicus	72	0.0791312	0.192019
Aves	Phasianus_colchicus	73	0.0779151	0.189068
Aves	Phasianus_colchicus	74	0.0763879	0.185363
Aves	Phasianus_colchicus	75	0.0768687	0.186529
Aves	Phasianus_colchicus	76	0.0767273	0.186186
Aves	Phasianus_colchicus	77	0.0769253	0.186666
Aves	Phasianus_colchicus	78	0.0773212	0.187627
Aves	Phasianus_colchicus	79	0.0760202	0.18447
Aves	Phasianus_colchicus	80	0.0724002	0.175686
Aves	Serinus_canaria	1	0.102532	0.241478
Aves	Serinus_canaria	2	0.101381	0.238768
Aves	Serinus_canaria	3	0.0981013	0.231044
Aves	Serinus_canaria	4	0.0998849	0.235245
Aves	Serinus_canaria	5	0.0989643	0.233077
Aves	Serinus_canaria	6	0.096893	0.228198
Aves	Serinus_canaria	7	0.097756	0.230231
Aves	Serinus_canaria	8	0.0967779	0.227927
Aves	Serinus_canaria	9	0.0978711	0.230502
Aves	Serinus_canaria	10	0.100633	0.237006
Aves	Serinus_canaria	11	0.0976985	0.230095
Aves	Serinus_canaria	12	0.0959148	0.225895
Aves	Serinus_canaria	13	0.095397	0.224675
Aves	Serinus_canaria	14	0.0988493	0.232806
Aves	Serinus_canaria	15	0.101266	0.238497
Aves	Serinus_canaria	16	0.103222	0.243104
Aves	Serinus_canaria	17	0.104718	0.246628
Aves	Serinus_canaria	18	0.10748	0.253132
Aves	Serinus_canaria	19	0.106329	0.250422
Aves	Serinus_canaria	20	0.10702	0.252048
Aves	Serinus_canaria	21	0.107595	0.253403
Aves	Serinus_canaria	22	0.110529	0.260314
Aves	Serinus_canaria	23	0.111277	0.262076
Aves	Serinus_canaria	24	0.114212	0.268987
Aves	Serinus_canaria	25	0.114327	0.269258
Aves	Serinus_canaria	26	0.116801	0.275085
Aves	Serinus_canaria	27	0.119678	0.28186
Aves	Serinus_canaria	28	0.12336	0.290533
Aves	Serinus_canaria	29	0.126007	0.296766
Aves	Serinus_canaria	30	0.133429	0.314247
Aves	Serinus_canaria	31	0.136824	0.322242
Aves	Serinus_canaria	32	0.1416	0.333489
Aves	Serinus_canaria	33	0.150921	0.355442
Aves	Serinus_canaria	34	0.163867	0.385931
Aves	Serinus_canaria	35	0.170829	0.402328
Aves	Serinus_canaria	36	0.178999	0.421571
Aves	Serinus_canaria	37	0.179229	0.422113
Aves	Serinus_canaria	38	0.185731	0.437425
Aves	Serinus_canaria	39	0.195052	0.459378
Aves	Serinus_canaria	40	0.200806	0.472929
Aves	Serinus_canaria	41	0.202819	0.477672
Aves	Serinus_canaria	42	0.196318	0.462359
Aves	Serinus_canaria	43	0.183429	0.432005
Aves	Serinus_canaria	44	0.174511	0.411001
Aves	Serinus_canaria	45	0.167664	0.394875
Aves	Serinus_canaria	46	0.161738	0.380918
Aves	Serinus_canaria	47	0.155178	0.36547
Aves	Serinus_canaria	48	0.145972	0.343788
Aves	Serinus_canaria	49	0.141657	0.333625
Aves	Serinus_canaria	50	0.134235	0.316144
Aves	Serinus_canaria	51	0.129632	0.305303
Aves	Serinus_canaria	52	0.12641	0.297715
Aves	Serinus_canaria	53	0.120426	0.283622
Aves	Serinus_canaria	54	0.115305	0.271561
Aves	Serinus_canaria	55	0.113579	0.267496
Aves	Serinus_canaria	56	0.110702	0.260721
Aves	Serinus_canaria	57	0.103625	0.244053
Aves	Serinus_canaria	58	0.101496	0.239039
Aves	Serinus_canaria	59	0.100863	0.237548
Aves	Serinus_canaria	60	0.100518	0.236735
Aves	Serinus_canaria	61	0.101266	0.238497
Aves	Serinus_canaria	62	0.0948792	0.223455
Aves	Serinus_canaria	63	0.0905639	0.213292
Aves	Serinus_canaria	64	0.0887802	0.209091
Aves	Serinus_canaria	65	0.0913694	0.215189
Aves	Serinus_canaria	66	0.09229	0.217357
Aves	Serinus_canaria	67	0.0896433	0.211124
Aves	Serinus_canaria	68	0.0863061	0.203264
Aves	Serinus_canaria	69	0.0872842	0.205568
Aves	Serinus_canaria	70	0.0871116	0.205162
Aves	Serinus_canaria	71	0.0863636	0.2034
Aves	Serinus_canaria	72	0.0859609	0.202451
Aves	Serinus_canaria	73	0.0864212	0.203536
Aves	Serinus_canaria	74	0.0842348	0.198386
Aves	Serinus_canaria	75	0.0838895	0.197573
Aves	Serinus_canaria	76	0.08458	0.199199
Aves	Serinus_canaria	77	0.0851554	0.200554
Aves	Serinus_canaria	78	0.0817031	0.192424
Aves	Serinus_canaria	79	0.0784235	0.1847
Aves	Serinus_canaria	80	0.0785386	0.184971
Aves	Stachyris_ruficeps	1	0.116199	0.275745
Aves	Stachyris_ruficeps	2	0.118482	0.281162
Aves	Stachyris_ruficeps	3	0.120496	0.285942
Aves	Stachyris_ruficeps	4	0.120317	0.285517
Aves	Stachyris_ruficeps	5	0.121391	0.288066
Aves	Stachyris_ruficeps	6	0.120138	0.285092
Aves	Stachyris_ruficeps	7	0.122824	0.291465
Aves	Stachyris_ruficeps	8	0.120899	0.286898
Aves	Stachyris_ruficeps	9	0.122958	0.291784
Aves	Stachyris_ruficeps	10	0.124345	0.295077
Aves	Stachyris_ruficeps	11	0.128419	0.304743
Aves	Stachyris_ruficeps	12	0.129269	0.306761
Aves	Stachyris_ruficeps	13	0.133342	0.316427
Aves	Stachyris_ruficeps	14	0.1337	0.317277
Aves	Stachyris_ruficeps	15	0.134506	0.319189
Aves	Stachyris_ruficeps	16	0.14131	0.335334
Aves	Stachyris_ruficeps	17	0.143592	0.340751
Aves	Stachyris_ruficeps	18	0.146726	0.348186
Aves	Stachyris_ruficeps	19	0.151605	0.359764
Aves	Stachyris_ruficeps	20	0.160154	0.380052
Aves	Stachyris_ruficeps	21	0.173314	0.411281
Aves	Stachyris_ruficeps	22	0.170359	0.40427
Aves	Stachyris_ruficeps	23	0.172195	0.408625
Aves	Stachyris_ruficeps	24	0.187413	0.44474
Aves	Stachyris_ruficeps	25	0.196052	0.46524
Aves	Stachyris_ruficeps	26	0.208898	0.495725
Aves	Stachyris_ruficeps	27	0.219372	0.52058
Aves	Stachyris_ruficeps	28	0.231458	0.549259
Aves	Stachyris_ruficeps	29	0.242514	0.575495
Aves	Stachyris_ruficeps	30	0.260194	0.617452
Aves	Stachyris_ruficeps	31	0.275637	0.654098
Aves	Stachyris_ruficeps	32	0.282485	0.670349
Aves	Stachyris_ruficeps	33	0.291706	0.69223
Aves	Stachyris_ruficeps	34	0.305582	0.725158
Aves	Stachyris_ruficeps	35	0.325724	0.772957
Aves	Stachyris_ruficeps	36	0.334542	0.793882
Aves	Stachyris_ruficeps	37	0.346896	0.823198
Aves	Stachyris_ruficeps	38	0.362786	0.860906
Aves	Stachyris_ruficeps	39	0.389419	0.924107
Aves	Stachyris_ruficeps	40	0.396401	0.940677
Aves	Stachyris_ruficeps	41	0.395014	0.937384
Aves	Stachyris_ruficeps	42	0.387404	0.919327
Aves	Stachyris_ruficeps	43	0.358489	0.850709
Aves	Stachyris_ruficeps	44	0.338257	0.802698
Aves	Stachyris_ruficeps	45	0.32465	0.770408
Aves	Stachyris_ruficeps	46	0.311714	0.73971
Aves	Stachyris_ruficeps	47	0.293765	0.697116
Aves	Stachyris_ruficeps	48	0.279486	0.663232
Aves	Stachyris_ruficeps	49	0.275458	0.653673
Aves	Stachyris_ruficeps	50	0.262432	0.622763
Aves	Stachyris_ruficeps	51	0.245378	0.582293
Aves	Stachyris_ruficeps	52	0.232085	0.550746
Aves	Stachyris_ruficeps	53	0.212435	0.504116
Aves	Stachyris_ruficeps	54	0.19932	0.472994
Aves	Stachyris_ruficeps	55	0.191889	0.455362
Aves	Stachyris_ruficeps	56	0.17967	0.426364
Aves	Stachyris_ruficeps	57	0.17403	0.41298
Aves	Stachyris_ruficeps	58	0.167763	0.398109
Aves	Stachyris_ruficeps	59	0.162661	0.386
Aves	Stachyris_ruficeps	60	0.155991	0.370174
Aves	Stachyris_ruficeps	61	0.154917	0.367625
Aves	Stachyris_ruficeps	62	0.149993	0.35594
Aves	Stachyris_ruficeps	63	0.140594	0.333634
Aves	Stachyris_ruficeps	64	0.134282	0.318657
Aves	Stachyris_ruficeps	65	0.129672	0.307717
Aves	Stachyris_ruficeps	66	0.125688	0.298263
Aves	Stachyris_ruficeps	67	0.121257	0.287748
Aves	Stachyris_ruficeps	68	0.122331	0.290297
Aves	Stachyris_ruficeps	69	0.121481	0.288279
Aves	Stachyris_ruficeps	70	0.119869	0.284455
Aves	Stachyris_ruficeps	71	0.110738	0.262786
Aves	Stachyris_ruficeps	72	0.111633	0.264911
Aves	Stachyris_ruficeps	73	0.113737	0.269903
Aves	Stachyris_ruficeps	74	0.110067	0.261193
Aves	Stachyris_ruficeps	75	0.107515	0.255138
Aves	Stachyris_ruficeps	76	0.108187	0.256732
Aves	Stachyris_ruficeps	77	0.108366	0.257157
Aves	Stachyris_ruficeps	78	0.106933	0.253758
Aves	Stachyris_ruficeps	79	0.106665	0.25312
Aves	Stachyris_ruficeps	80	0.105993	0.251527
Aves	Strigops_habroptila	1	0.0916964	0.218481
Aves	Strigops_habroptila	2	0.0925185	0.22044
Aves	Strigops_habroptila	3	0.0943272	0.224749
Aves	Strigops_habroptila	4	0.0979995	0.233499
Aves	Strigops_habroptila	5	0.0966292	0.230234
Aves	Strigops_habroptila	6	0.094382	0.22488
Aves	Strigops_habroptila	7	0.0944916	0.225141
Aves	Strigops_habroptila	8	0.0954782	0.227492
Aves	Strigops_habroptila	9	0.0965196	0.229973
Aves	Strigops_habroptila	10	0.0995341	0.237155
Aves	Strigops_habroptila	11	0.0994245	0.236894
Aves	Strigops_habroptila	12	0.0986572	0.235066
Aves	Strigops_habroptila	13	0.101836	0.24264
Aves	Strigops_habroptila	14	0.104083	0.247995
Aves	Strigops_habroptila	15	0.107262	0.255569
Aves	Strigops_habroptila	16	0.111976	0.2668
Aves	Strigops_habroptila	17	0.109564	0.261054
Aves	Strigops_habroptila	18	0.113839	0.27124
Aves	Strigops_habroptila	19	0.118169	0.281557
Aves	Strigops_habroptila	20	0.123212	0.293571
Aves	Strigops_habroptila	21	0.126665	0.301799
Aves	Strigops_habroptila	22	0.131214	0.312638
Aves	Strigops_habroptila	23	0.133461	0.317992
Aves	Strigops_habroptila	24	0.142943	0.340584
Aves	Strigops_habroptila	25	0.156152	0.372057
Aves	Strigops_habroptila	26	0.167059	0.398045
Aves	Strigops_habroptila	27	0.1755	0.418156
Aves	Strigops_habroptila	28	0.192327	0.458248
Aves	Strigops_habroptila	29	0.206139	0.491157
Aves	Strigops_habroptila	30	0.224335	0.534514
Aves	Strigops_habroptila	31	0.247355	0.589362
Aves	Strigops_habroptila	32	0.264566	0.630368
Aves	Strigops_habroptila	33	0.286983	0.683781
Aves	Strigops_habroptila	34	0.304905	0.726484
Aves	Strigops_habroptila	35	0.327158	0.779505
Aves	Strigops_habroptila	36	0.346999	0.826779
Aves	Strigops_habroptila	37	0.36399	0.867263
Aves	Strigops_habroptila	38	0.381036	0.907877
Aves	Strigops_habroptila	39	0.382954	0.912448
Aves	Strigops_habroptila	40	0.369307	0.87993
Aves	Strigops_habroptila	41	0.372047	0.88646
Aves	Strigops_habroptila	42	0.391066	0.931775
Aves	Strigops_habroptila	43	0.386572	0.921067
Aves	Strigops_habroptila	44	0.373034	0.88881
Aves	Strigops_habroptila	45	0.351165	0.836704
Aves	Strigops_habroptila	46	0.33516	0.798571
Aves	Strigops_habroptila	47	0.314442	0.749207
Aves	Strigops_habroptila	48	0.287257	0.684434
Aves	Strigops_habroptila	49	0.266922	0.635984
Aves	Strigops_habroptila	50	0.243025	0.579046
Aves	Strigops_habroptila	51	0.224061	0.533861
Aves	Strigops_habroptila	52	0.211291	0.503433
Aves	Strigops_habroptila	53	0.192217	0.457987
Aves	Strigops_habroptila	54	0.178789	0.425992
Aves	Strigops_habroptila	55	0.164374	0.391646
Aves	Strigops_habroptila	56	0.155495	0.37049
Aves	Strigops_habroptila	57	0.151548	0.361087
Aves	Strigops_habroptila	58	0.143217	0.341237
Aves	Strigops_habroptila	59	0.13675	0.325827
Aves	Strigops_habroptila	60	0.127049	0.302713
Aves	Strigops_habroptila	61	0.120197	0.286389
Aves	Strigops_habroptila	62	0.118992	0.283516
Aves	Strigops_habroptila	63	0.114716	0.273329
Aves	Strigops_habroptila	64	0.109181	0.26014
Aves	Strigops_habroptila	65	0.106002	0.252565
Aves	Strigops_habroptila	66	0.104577	0.24917
Aves	Strigops_habroptila	67	0.104851	0.249823
Aves	Strigops_habroptila	68	0.104193	0.248256
Aves	Strigops_habroptila	69	0.098712	0.235197
Aves	Strigops_habroptila	70	0.0973417	0.231932
Aves	Strigops_habroptila	71	0.098986	0.235849
Aves	Strigops_habroptila	72	0.0972869	0.231801
Aves	Strigops_habroptila	73	0.0954782	0.227492
Aves	Strigops_habroptila	74	0.092957	0.221484
Aves	Strigops_habroptila	75	0.0929022	0.221354
Aves	Strigops_habroptila	76	0.0942176	0.224488
Aves	Strigops_habroptila	77	0.0893395	0.212865
Aves	Strigops_habroptila	78	0.0912579	0.217436
Aves	Strigops_habroptila	79	0.0891751	0.212473
[truncated: 6,241 more rows]

## Sheet: G4 desity in 5 UTR
clade	species	bin_num	count	normalized_density
Amphibians	Xenopus_tropicalis	1	0.0714327	0.175381
Amphibians	Xenopus_tropicalis	2	0.0436503	0.10717
Amphibians	Xenopus_tropicalis	3	0.042287	0.103823
Amphibians	Xenopus_tropicalis	4	0.042349	0.103975
Amphibians	Xenopus_tropicalis	5	0.0416136	0.10217
Amphibians	Xenopus_tropicalis	6	0.0430141	0.105608
Amphibians	Xenopus_tropicalis	7	0.0441667	0.108438
Amphibians	Xenopus_tropicalis	8	0.0434933	0.106785
Amphibians	Xenopus_tropicalis	9	0.0446377	0.109594
Amphibians	Xenopus_tropicalis	10	0.0403784	0.0991368
Amphibians	Xenopus_tropicalis	11	0.0404652	0.0993498
Amphibians	Xenopus_tropicalis	12	0.0401182	0.0984978
Amphibians	Xenopus_tropicalis	13	0.0411592	0.101054
Amphibians	Xenopus_tropicalis	14	0.0389449	0.0956172
Amphibians	Xenopus_tropicalis	15	0.0377964	0.0927975
Amphibians	Xenopus_tropicalis	16	0.0361522	0.0887606
Amphibians	Xenopus_tropicalis	17	0.0349831	0.0858902
Amphibians	Xenopus_tropicalis	18	0.0361274	0.0886997
Amphibians	Xenopus_tropicalis	19	0.036429	0.0894402
Amphibians	Xenopus_tropicalis	20	0.0357019	0.087655
Amphibians	Xenopus_tropicalis	21	0.0368049	0.0903632
Amphibians	Xenopus_tropicalis	22	0.0356482	0.0875232
Amphibians	Xenopus_tropicalis	23	0.0329629	0.0809303
Amphibians	Xenopus_tropicalis	24	0.0337891	0.0829589
Amphibians	Xenopus_tropicalis	25	0.0344336	0.0845412
Amphibians	Xenopus_tropicalis	26	0.0352185	0.0864683
Amphibians	Xenopus_tropicalis	27	0.0331819	0.0814679
Amphibians	Xenopus_tropicalis	28	0.0338181	0.0830299
Amphibians	Xenopus_tropicalis	29	0.0328514	0.0806564
Amphibians	Xenopus_tropicalis	30	0.0335578	0.0823909
Amphibians	Xenopus_tropicalis	31	0.033975	0.0834153
Amphibians	Xenopus_tropicalis	32	0.0365157	0.0896532
Amphibians	Xenopus_tropicalis	33	0.036429	0.0894402
Amphibians	Xenopus_tropicalis	34	0.0354705	0.087087
Amphibians	Xenopus_tropicalis	35	0.0348509	0.0855656
Amphibians	Xenopus_tropicalis	36	0.0353838	0.086874
Amphibians	Xenopus_tropicalis	37	0.0356523	0.0875333
Amphibians	Xenopus_tropicalis	38	0.0353053	0.0866813
Amphibians	Xenopus_tropicalis	39	0.035264	0.0865799
Amphibians	Xenopus_tropicalis	40	0.0339172	0.0832733
Amphibians	Xenopus_tropicalis	41	0.0347104	0.0852207
Amphibians	Xenopus_tropicalis	42	0.0351194	0.0862249
Amphibians	Xenopus_tropicalis	43	0.0348013	0.0854439
Amphibians	Xenopus_tropicalis	44	0.0352309	0.0864987
Amphibians	Xenopus_tropicalis	45	0.0348013	0.0854439
Amphibians	Xenopus_tropicalis	46	0.0340701	0.0836486
Amphibians	Xenopus_tropicalis	47	0.0349789	0.08588
Amphibians	Xenopus_tropicalis	48	0.0338387	0.0830806
Amphibians	Xenopus_tropicalis	49	0.0349748	0.0858699
Amphibians	Xenopus_tropicalis	50	0.0370197	0.0908906
Amphibians	Xenopus_tropicalis	51	0.0378295	0.0928786
Amphibians	Xenopus_tropicalis	52	0.0378543	0.0929395
Amphibians	Xenopus_tropicalis	53	0.036776	0.0902922
Amphibians	Xenopus_tropicalis	54	0.0366686	0.0900285
Amphibians	Xenopus_tropicalis	55	0.0369702	0.0907689
Amphibians	Xenopus_tropicalis	56	0.0369784	0.0907892
Amphibians	Xenopus_tropicalis	57	0.0353136	0.0867016
Amphibians	Xenopus_tropicalis	58	0.0368173	0.0903936
Amphibians	Xenopus_tropicalis	59	0.0364166	0.0894097
Amphibians	Xenopus_tropicalis	60	0.0354044	0.0869247
Amphibians	Xenopus_tropicalis	61	0.0346484	0.0850686
Amphibians	Xenopus_tropicalis	62	0.0349624	0.0858394
Amphibians	Xenopus_tropicalis	63	0.0346278	0.0850179
Amphibians	Xenopus_tropicalis	64	0.0334173	0.082046
Amphibians	Xenopus_tropicalis	65	0.0326241	0.0800986
Amphibians	Xenopus_tropicalis	66	0.0341651	0.0838819
Amphibians	Xenopus_tropicalis	67	0.033091	0.0812447
Amphibians	Xenopus_tropicalis	68	0.035421	0.0869653
Amphibians	Xenopus_tropicalis	69	0.0365364	0.0897039
Amphibians	Xenopus_tropicalis	70	0.0361398	0.0887302
Amphibians	Xenopus_tropicalis	71	0.035169	0.0863466
Amphibians	Xenopus_tropicalis	72	0.0349211	0.085738
Amphibians	Xenopus_tropicalis	73	0.0340494	0.0835979
Amphibians	Xenopus_tropicalis	74	0.0370197	0.0908906
Amphibians	Xenopus_tropicalis	75	0.0344088	0.0844803
Amphibians	Xenopus_tropicalis	76	0.0330703	0.081194
Amphibians	Xenopus_tropicalis	77	0.0332025	0.0815186
Amphibians	Xenopus_tropicalis	78	0.0326448	0.0801493
Amphibians	Xenopus_tropicalis	79	0.0327109	0.0803116
Amphibians	Xenopus_tropicalis	80	0.0317401	0.077928
Amphibians	Xenopus_tropicalis	81	0.0325828	0.0799971
Amphibians	Xenopus_tropicalis	82	0.0341816	0.0839224
Amphibians	Xenopus_tropicalis	83	0.0346608	0.085099
Amphibians	Xenopus_tropicalis	84	0.032306	0.0793176
Amphibians	Xenopus_tropicalis	85	0.0308147	0.075656
Amphibians	Xenopus_tropicalis	86	0.0326076	0.080058
Amphibians	Xenopus_tropicalis	87	0.0339213	0.0832834
Amphibians	Xenopus_tropicalis	88	0.0330166	0.0810621
Amphibians	Xenopus_tropicalis	89	0.0390688	0.0959215
Amphibians	Xenopus_tropicalis	90	0.0380112	0.0933249
Amphibians	Xenopus_tropicalis	91	0.0367595	0.0902516
Amphibians	Xenopus_tropicalis	92	0.0377262	0.0926251
Amphibians	Xenopus_tropicalis	93	0.0346278	0.0850179
Amphibians	Xenopus_tropicalis	94	0.035611	0.0874319
Amphibians	Xenopus_tropicalis	95	0.033752	0.0828676
Amphibians	Xenopus_tropicalis	96	0.0334091	0.0820257
Amphibians	Xenopus_tropicalis	97	0.0321119	0.0788408
Amphibians	Xenopus_tropicalis	98	0.030385	0.0746011
Amphibians	Xenopus_tropicalis	99	0.0296538	0.0728058
Amphibians	Xenopus_tropicalis	100	0.0442246	0.10858
Amphibians	Leptobrachium_leishanense	1	0.054511	0.124625
Amphibians	Leptobrachium_leishanense	2	0.0363612	0.0831303
Amphibians	Leptobrachium_leishanense	3	0.0346028	0.0791101
Amphibians	Leptobrachium_leishanense	4	0.0319344	0.0730096
Amphibians	Leptobrachium_leishanense	5	0.031381	0.0717445
Amphibians	Leptobrachium_leishanense	6	0.0341109	0.0779856
Amphibians	Leptobrachium_leishanense	7	0.0329919	0.0754273
Amphibians	Leptobrachium_leishanense	8	0.0329181	0.0752586
Amphibians	Leptobrachium_leishanense	9	0.0326968	0.0747526
Amphibians	Leptobrachium_leishanense	10	0.0329181	0.0752586
Amphibians	Leptobrachium_leishanense	11	0.0315409	0.07211
Amphibians	Leptobrachium_leishanense	12	0.0326107	0.0745558
Amphibians	Leptobrachium_leishanense	13	0.0284667	0.0650817
Amphibians	Leptobrachium_leishanense	14	0.027815	0.0635917
Amphibians	Leptobrachium_leishanense	15	0.0290201	0.0663468
Amphibians	Leptobrachium_leishanense	16	0.0265976	0.0608085
Amphibians	Leptobrachium_leishanense	17	0.0279626	0.0639291
Amphibians	Leptobrachium_leishanense	18	0.0275568	0.0630013
Amphibians	Leptobrachium_leishanense	19	0.0273354	0.0624953
Amphibians	Leptobrachium_leishanense	20	0.027483	0.0628326
Amphibians	Leptobrachium_leishanense	21	0.0267944	0.0612583
Amphibians	Leptobrachium_leishanense	22	0.0267083	0.0610615
Amphibians	Leptobrachium_leishanense	23	0.0283192	0.0647443
Amphibians	Leptobrachium_leishanense	24	0.0270526	0.0618487
Amphibians	Leptobrachium_leishanense	25	0.0273477	0.0625234
Amphibians	Leptobrachium_leishanense	26	0.0275937	0.0630857
Amphibians	Leptobrachium_leishanense	27	0.0267698	0.0612021
Amphibians	Leptobrachium_leishanense	28	0.0253065	0.0578566
Amphibians	Leptobrachium_leishanense	29	0.0261181	0.0597121
Amphibians	Leptobrachium_leishanense	30	0.0280609	0.064154
Amphibians	Leptobrachium_leishanense	31	0.0275076	0.0628889
Amphibians	Leptobrachium_leishanense	32	0.0276552	0.0632262
Amphibians	Leptobrachium_leishanense	33	0.0266591	0.0609491
Amphibians	Leptobrachium_leishanense	34	0.0245195	0.0560574
Amphibians	Leptobrachium_leishanense	35	0.0246302	0.0563104
Amphibians	Leptobrachium_leishanense	36	0.0234989	0.053724
Amphibians	Leptobrachium_leishanense	37	0.0235481	0.0538365
Amphibians	Leptobrachium_leishanense	38	0.0249745	0.0570976
Amphibians	Leptobrachium_leishanense	39	0.0253434	0.057941
Amphibians	Leptobrachium_leishanense	40	0.0289094	0.0660938
Amphibians	Leptobrachium_leishanense	41	0.0304957	0.0697203
Amphibians	Leptobrachium_leishanense	42	0.0307416	0.0702826
Amphibians	Leptobrachium_leishanense	43	0.0307047	0.0701983
Amphibians	Leptobrachium_leishanense	44	0.0308892	0.07062
Amphibians	Leptobrachium_leishanense	45	0.0278642	0.0637042
Amphibians	Leptobrachium_leishanense	46	0.0262533	0.0600213
Amphibians	Leptobrachium_leishanense	47	0.0251097	0.0574068
Amphibians	Leptobrachium_leishanense	48	0.0248761	0.0568727
Amphibians	Leptobrachium_leishanense	49	0.0248269	0.0567602
Amphibians	Leptobrachium_leishanense	50	0.0251097	0.0574068
Amphibians	Leptobrachium_leishanense	51	0.0254295	0.0581378
Amphibians	Leptobrachium_leishanense	52	0.0261919	0.0598808
Amphibians	Leptobrachium_leishanense	53	0.0265853	0.0607804
Amphibians	Leptobrachium_leishanense	54	0.0261673	0.0598246
Amphibians	Leptobrachium_leishanense	55	0.0283561	0.0648287
Amphibians	Leptobrachium_leishanense	56	0.0298685	0.0682866
Amphibians	Leptobrachium_leishanense	57	0.0297087	0.0679211
Amphibians	Leptobrachium_leishanense	58	0.028811	0.0658689
Amphibians	Leptobrachium_leishanense	59	0.0299669	0.0685115
Amphibians	Leptobrachium_leishanense	60	0.0317253	0.0725316
Amphibians	Leptobrachium_leishanense	61	0.0325	0.0743028
Amphibians	Leptobrachium_leishanense	62	0.0321311	0.0734594
Amphibians	Leptobrachium_leishanense	63	0.0306432	0.0700577
Amphibians	Leptobrachium_leishanense	64	0.0308277	0.0704794
Amphibians	Leptobrachium_leishanense	65	0.0279134	0.0638166
Amphibians	Leptobrachium_leishanense	66	0.0262287	0.0599651
Amphibians	Leptobrachium_leishanense	67	0.0260812	0.0596278
Amphibians	Leptobrachium_leishanense	68	0.0279749	0.0639572
Amphibians	Leptobrachium_leishanense	69	0.0304588	0.069636
Amphibians	Leptobrachium_leishanense	70	0.0287127	0.065644
Amphibians	Leptobrachium_leishanense	71	0.027606	0.0631138
Amphibians	Leptobrachium_leishanense	72	0.0287741	0.0657845
Amphibians	Leptobrachium_leishanense	73	0.0289709	0.0662343
Amphibians	Leptobrachium_leishanense	74	0.0307047	0.0701983
Amphibians	Leptobrachium_leishanense	75	0.0280732	0.0641821
Amphibians	Leptobrachium_leishanense	76	0.0304711	0.0696641
Amphibians	Leptobrachium_leishanense	77	0.0293029	0.0669934
Amphibians	Leptobrachium_leishanense	78	0.0278765	0.0637323
Amphibians	Leptobrachium_leishanense	79	0.0296103	0.0676962
Amphibians	Leptobrachium_leishanense	80	0.0298317	0.0682022
Amphibians	Leptobrachium_leishanense	81	0.0268559	0.0613989
Amphibians	Leptobrachium_leishanense	82	0.0267083	0.0610615
Amphibians	Leptobrachium_leishanense	83	0.0284175	0.0649692
Amphibians	Leptobrachium_leishanense	84	0.0282085	0.0644913
Amphibians	Leptobrachium_leishanense	85	0.0268436	0.0613708
Amphibians	Leptobrachium_leishanense	86	0.0249745	0.0570976
Amphibians	Leptobrachium_leishanense	87	0.0267452	0.0611459
Amphibians	Leptobrachium_leishanense	88	0.0277535	0.0634511
Amphibians	Leptobrachium_leishanense	89	0.0267821	0.0612302
Amphibians	Leptobrachium_leishanense	90	0.0270895	0.061933
Amphibians	Leptobrachium_leishanense	91	0.0257492	0.0588687
Amphibians	Leptobrachium_leishanense	92	0.0260566	0.0595715
Amphibians	Leptobrachium_leishanense	93	0.0243351	0.0556357
Amphibians	Leptobrachium_leishanense	94	0.0212732	0.0486356
Amphibians	Leptobrachium_leishanense	95	0.0212609	0.0486074
Amphibians	Leptobrachium_leishanense	96	0.0203386	0.046499
Amphibians	Leptobrachium_leishanense	97	0.0207444	0.0474267
Amphibians	Leptobrachium_leishanense	98	0.0201665	0.0461054
Amphibians	Leptobrachium_leishanense	99	0.0192934	0.0441094
Amphibians	Leptobrachium_leishanense	100	0.0321065	0.0734032
Aves	Aquila_chrysaetos	1	0.253082	0.601003
Aves	Aquila_chrysaetos	2	0.151855	0.360616
Aves	Aquila_chrysaetos	3	0.149258	0.354448
Aves	Aquila_chrysaetos	4	0.141348	0.335663
Aves	Aquila_chrysaetos	5	0.143527	0.340838
Aves	Aquila_chrysaetos	6	0.140392	0.333394
Aves	Aquila_chrysaetos	7	0.142959	0.339491
Aves	Aquila_chrysaetos	8	0.141974	0.337151
Aves	Aquila_chrysaetos	9	0.140124	0.332756
Aves	Aquila_chrysaetos	10	0.140392	0.333394
Aves	Aquila_chrysaetos	11	0.138362	0.328574
Aves	Aquila_chrysaetos	12	0.141676	0.336442
Aves	Aquila_chrysaetos	13	0.147109	0.349344
Aves	Aquila_chrysaetos	14	0.14496	0.34424
Aves	Aquila_chrysaetos	15	0.143795	0.341476
Aves	Aquila_chrysaetos	16	0.142213	0.337718
Aves	Aquila_chrysaetos	17	0.144751	0.343744
Aves	Aquila_chrysaetos	18	0.143825	0.341546
Aves	Aquila_chrysaetos	19	0.14278	0.339065
Aves	Aquila_chrysaetos	20	0.143825	0.341546
Aves	Aquila_chrysaetos	21	0.142482	0.338356
Aves	Aquila_chrysaetos	22	0.143616	0.34105
Aves	Aquila_chrysaetos	23	0.14075	0.334245
Aves	Aquila_chrysaetos	24	0.137944	0.327581
Aves	Aquila_chrysaetos	25	0.135049	0.320705
Aves	Aquila_chrysaetos	26	0.132243	0.314041
Aves	Aquila_chrysaetos	27	0.132273	0.314112
Aves	Aquila_chrysaetos	28	0.138691	0.329353
Aves	Aquila_chrysaetos	29	0.142273	0.33786
Aves	Aquila_chrysaetos	30	0.147049	0.349202
Aves	Aquila_chrysaetos	31	0.148512	0.352676
Aves	Aquila_chrysaetos	32	0.146333	0.347501
Aves	Aquila_chrysaetos	33	0.147885	0.351187
Aves	Aquila_chrysaetos	34	0.144034	0.342043
Aves	Aquila_chrysaetos	35	0.147378	0.349982
Aves	Aquila_chrysaetos	36	0.151169	0.358985
Aves	Aquila_chrysaetos	37	0.14684	0.348706
Aves	Aquila_chrysaetos	38	0.144512	0.343177
Aves	Aquila_chrysaetos	39	0.14287	0.339278
Aves	Aquila_chrysaetos	40	0.142243	0.337789
Aves	Aquila_chrysaetos	41	0.146154	0.347076
Aves	Aquila_chrysaetos	42	0.14487	0.344028
Aves	Aquila_chrysaetos	43	0.143557	0.340908
Aves	Aquila_chrysaetos	44	0.143168	0.339987
Aves	Aquila_chrysaetos	45	0.14293	0.33942
Aves	Aquila_chrysaetos	46	0.144601	0.34339
Aves	Aquila_chrysaetos	47	0.142661	0.338782
Aves	Aquila_chrysaetos	48	0.142213	0.337718
Aves	Aquila_chrysaetos	49	0.141765	0.336655
Aves	Aquila_chrysaetos	50	0.139825	0.332047
Aves	Aquila_chrysaetos	51	0.138691	0.329353
Aves	Aquila_chrysaetos	52	0.135288	0.321272
Aves	Aquila_chrysaetos	53	0.130482	0.309859
Aves	Aquila_chrysaetos	54	0.131437	0.312127
Aves	Aquila_chrysaetos	55	0.13275	0.315246
Aves	Aquila_chrysaetos	56	0.13475	0.319996
Aves	Aquila_chrysaetos	57	0.135944	0.322832
Aves	Aquila_chrysaetos	58	0.137109	0.325596
Aves	Aquila_chrysaetos	59	0.138153	0.328077
Aves	Aquila_chrysaetos	60	0.137168	0.325738
Aves	Aquila_chrysaetos	61	0.139646	0.331622
Aves	Aquila_chrysaetos	62	0.134303	0.318933
Aves	Aquila_chrysaetos	63	0.13481	0.320138
Aves	Aquila_chrysaetos	64	0.132183	0.313899
Aves	Aquila_chrysaetos	65	0.133497	0.317019
Aves	Aquila_chrysaetos	66	0.137079	0.325525
Aves	Aquila_chrysaetos	67	0.136571	0.32432
Aves	Aquila_chrysaetos	68	0.133317	0.316593
Aves	Aquila_chrysaetos	69	0.132661	0.315034
Aves	Aquila_chrysaetos	70	0.133467	0.316948
Aves	Aquila_chrysaetos	71	0.136004	0.322973
Aves	Aquila_chrysaetos	72	0.137377	0.326234
Aves	Aquila_chrysaetos	73	0.136631	0.324462
Aves	Aquila_chrysaetos	74	0.136661	0.324533
Aves	Aquila_chrysaetos	75	0.138004	0.327723
Aves	Aquila_chrysaetos	76	0.134661	0.319783
Aves	Aquila_chrysaetos	77	0.131198	0.31156
Aves	Aquila_chrysaetos	78	0.131825	0.313049
Aves	Aquila_chrysaetos	79	0.132631	0.314963
Aves	Aquila_chrysaetos	80	0.131258	0.311702
Aves	Aquila_chrysaetos	81	0.130332	0.309504
Aves	Aquila_chrysaetos	82	0.127944	0.303833
Aves	Aquila_chrysaetos	83	0.127795	0.303479
Aves	Aquila_chrysaetos	84	0.125198	0.297311
Aves	Aquila_chrysaetos	85	0.126422	0.300218
Aves	Aquila_chrysaetos	86	0.122063	0.289868
Aves	Aquila_chrysaetos	87	0.117824	0.279802
Aves	Aquila_chrysaetos	88	0.117466	0.278951
Aves	Aquila_chrysaetos	89	0.114183	0.271153
Aves	Aquila_chrysaetos	90	0.111018	0.263639
Aves	Aquila_chrysaetos	91	0.105406	0.250311
Aves	Aquila_chrysaetos	92	0.105048	0.249461
Aves	Aquila_chrysaetos	93	0.103854	0.246625
Aves	Aquila_chrysaetos	94	0.104331	0.247759
Aves	Aquila_chrysaetos	95	0.103137	0.244924
Aves	Aquila_chrysaetos	96	0.0996448	0.23663
Aves	Aquila_chrysaetos	97	0.0993462	0.235921
Aves	Aquila_chrysaetos	98	0.0977343	0.232093
Aves	Aquila_chrysaetos	99	0.0943909	0.224153
Aves	Aquila_chrysaetos	100	0.159318	0.378338
Aves	Meleagris_gallopavo	1	0.0462481	0.111818
Aves	Meleagris_gallopavo	2	0.0347982	0.0841349
Aves	Meleagris_gallopavo	3	0.0382661	0.0925195
Aves	Meleagris_gallopavo	4	0.0407474	0.0985188
Aves	Meleagris_gallopavo	5	0.0418535	0.101193
Aves	Meleagris_gallopavo	6	0.0412257	0.0996753
Aves	Meleagris_gallopavo	7	0.0447833	0.108277
Aves	Meleagris_gallopavo	8	0.0450822	0.109
Aves	Meleagris_gallopavo	9	0.0437967	0.105891
Aves	Meleagris_gallopavo	10	0.0435874	0.105386
Aves	Meleagris_gallopavo	11	0.0374888	0.0906402
Aves	Meleagris_gallopavo	12	0.0373991	0.0904234
Aves	Meleagris_gallopavo	13	0.0357549	0.0864479
Aves	Meleagris_gallopavo	14	0.0359641	0.0869539
Aves	Meleagris_gallopavo	15	0.0356652	0.0862311
Aves	Meleagris_gallopavo	16	0.0377578	0.0912907
Aves	Meleagris_gallopavo	17	0.0376084	0.0909293
Aves	Meleagris_gallopavo	18	0.0371001	0.0897006
Aves	Meleagris_gallopavo	19	0.0368311	0.08905
Aves	Meleagris_gallopavo	20	0.0348879	0.0843518
Aves	Meleagris_gallopavo	21	0.0350374	0.0847132
Aves	Meleagris_gallopavo	22	0.0330045	0.0797981
Aves	Meleagris_gallopavo	23	0.0330942	0.0800149
Aves	Meleagris_gallopavo	24	0.0292975	0.0708352
Aves	Meleagris_gallopavo	25	0.0286996	0.0693896
Aves	Meleagris_gallopavo	26	0.0310912	0.0751721
Aves	Meleagris_gallopavo	27	0.0322571	0.0779911
Aves	Meleagris_gallopavo	28	0.0336024	0.0812437
Aves	Meleagris_gallopavo	29	0.033722	0.0815328
Aves	Meleagris_gallopavo	30	0.0353662	0.0855083
Aves	Meleagris_gallopavo	31	0.0348281	0.0842072
Aves	Meleagris_gallopavo	32	0.0330942	0.0800149
Aves	Meleagris_gallopavo	33	0.0300747	0.0727146
Aves	Meleagris_gallopavo	34	0.028849	0.069751
Aves	Meleagris_gallopavo	35	0.0313004	0.0756781
Aves	Meleagris_gallopavo	36	0.0319581	0.0772682
Aves	Meleagris_gallopavo	37	0.0307922	0.0744493
Aves	Meleagris_gallopavo	38	0.0305531	0.073871
Aves	Meleagris_gallopavo	39	0.030852	0.0745939
Aves	Meleagris_gallopavo	40	0.0303737	0.0734374
Aves	Meleagris_gallopavo	41	0.031988	0.0773405
Aves	Meleagris_gallopavo	42	0.0303139	0.0732928
Aves	Meleagris_gallopavo	43	0.0286099	0.0691728
Aves	Meleagris_gallopavo	44	0.0284006	0.0686668
Aves	Meleagris_gallopavo	45	0.0237668	0.0574633
Aves	Meleagris_gallopavo	46	0.024574	0.0594149
Aves	Meleagris_gallopavo	47	0.0234081	0.0565959
Aves	Meleagris_gallopavo	48	0.0260389	0.0629566
Aves	Meleagris_gallopavo	49	0.0276532	0.0668598
Aves	Meleagris_gallopavo	50	0.0278924	0.067438
Aves	Meleagris_gallopavo	51	0.0297459	0.0719195
Aves	Meleagris_gallopavo	52	0.0300149	0.07257
Aves	Meleagris_gallopavo	53	0.0295067	0.0713412
Aves	Meleagris_gallopavo	54	0.0294469	0.0711967
Aves	Meleagris_gallopavo	55	0.028849	0.069751
Aves	Meleagris_gallopavo	56	0.0309118	0.0747384
Aves	Meleagris_gallopavo	57	0.0287593	0.0695342
Aves	Meleagris_gallopavo	58	0.0290284	0.0701847
Aves	Meleagris_gallopavo	59	0.0285202	0.0689559
Aves	Meleagris_gallopavo	60	0.0304634	0.0736542
Aves	Meleagris_gallopavo	61	0.031151	0.0753167
Aves	Meleagris_gallopavo	62	0.0313004	0.0756781
Aves	Meleagris_gallopavo	63	0.0324963	0.0785693
Aves	Meleagris_gallopavo	64	0.0307922	0.0744493
Aves	Meleagris_gallopavo	65	0.0316293	0.0764732
Aves	Meleagris_gallopavo	66	0.0316592	0.0765454
Aves	Meleagris_gallopavo	67	0.0298655	0.0722086
Aves	Meleagris_gallopavo	68	0.028849	0.069751
Aves	Meleagris_gallopavo	69	0.0272646	0.0659201
Aves	Meleagris_gallopavo	70	0.0305232	0.0737988
Aves	Meleagris_gallopavo	71	0.0295067	0.0713412
Aves	Meleagris_gallopavo	72	0.0290583	0.070257
Aves	Meleagris_gallopavo	73	0.0268759	0.0649805
Aves	Meleagris_gallopavo	74	0.0263378	0.0636794
Aves	Meleagris_gallopavo	75	0.0275934	0.0667152
Aves	Meleagris_gallopavo	76	0.0282511	0.0683054
Aves	Meleagris_gallopavo	77	0.0288191	0.0696788
Aves	Meleagris_gallopavo	78	0.0274439	0.0663538
Aves	Meleagris_gallopavo	79	0.0282511	0.0683054
Aves	Meleagris_gallopavo	80	0.0284006	0.0686668
Aves	Meleagris_gallopavo	81	0.026577	0.0642577
Aves	Meleagris_gallopavo	82	0.0255007	0.0616556
Aves	Meleagris_gallopavo	83	0.0241555	0.0584029
Aves	Meleagris_gallopavo	84	0.025142	0.0607882
Aves	Meleagris_gallopavo	85	0.0261883	0.063318
Aves	Meleagris_gallopavo	86	0.0246039	0.0594872
Aves	Meleagris_gallopavo	87	0.0253214	0.0612219
Aves	Meleagris_gallopavo	88	0.0246338	0.0595594
Aves	Meleagris_gallopavo	89	0.028281	0.0683777
Aves	Meleagris_gallopavo	90	0.0260688	0.0630289
Aves	Meleagris_gallopavo	91	0.0255007	0.0616556
Aves	Meleagris_gallopavo	92	0.0250224	0.0604991
Aves	Meleagris_gallopavo	93	0.0236472	0.0571742
Aves	Meleagris_gallopavo	94	0.0271151	0.0655587
Aves	Meleagris_gallopavo	95	0.0252018	0.0609328
Aves	Meleagris_gallopavo	96	0.0254709	0.0615833
Aves	Meleagris_gallopavo	97	0.0250224	0.0604991
Aves	Meleagris_gallopavo	98	0.0235277	0.056885
Aves	Meleagris_gallopavo	99	0.0234679	0.0567405
Aves	Meleagris_gallopavo	100	0.0425411	0.102856
Aves	Amazona_collaria	1	0.211847	0.50023
Aves	Amazona_collaria	2	0.117319	0.277023
Aves	Amazona_collaria	3	0.117922	0.278446
Aves	Amazona_collaria	4	0.114608	0.270622
Aves	Amazona_collaria	5	0.110392	0.260665
Aves	Amazona_collaria	6	0.109237	0.257938
Aves	Amazona_collaria	7	0.110291	0.260428
Aves	Amazona_collaria	8	0.108785	0.256872
Aves	Amazona_collaria	9	0.106928	0.252486
Aves	Amazona_collaria	10	0.105673	0.249522
Aves	Amazona_collaria	11	0.11009	0.259954
Aves	Amazona_collaria	12	0.107731	0.254382
Aves	Amazona_collaria	13	0.109287	0.258057
Aves	Amazona_collaria	14	0.104367	0.24644
Aves	Amazona_collaria	15	0.109237	0.257938
Aves	Amazona_collaria	16	0.110693	0.261376
Aves	Amazona_collaria	17	0.111245	0.26268
Aves	Amazona_collaria	18	0.106476	0.251419
Aves	Amazona_collaria	19	0.109538	0.25865
Aves	Amazona_collaria	20	0.107078	0.252841
Aves	Amazona_collaria	21	0.106225	0.250826
Aves	Amazona_collaria	22	0.103062	0.243358
Aves	Amazona_collaria	23	0.102159	0.241225
Aves	Amazona_collaria	24	0.101958	0.24075
Aves	Amazona_collaria	25	0.101657	0.240039
Aves	Amazona_collaria	26	0.101757	0.240276
Aves	Amazona_collaria	27	0.0999498	0.236009
Aves	Amazona_collaria	28	0.101104	0.238735
Aves	Amazona_collaria	29	0.104819	0.247507
Aves	Amazona_collaria	30	0.10497	0.247863
Aves	Amazona_collaria	31	0.101456	0.239565
Aves	Amazona_collaria	32	0.0970382	0.229134
Aves	Amazona_collaria	33	0.0979418	0.231267
Aves	Amazona_collaria	34	0.0976908	0.230675
Aves	Amazona_collaria	35	0.0983434	0.232216
Aves	Amazona_collaria	36	0.0998996	0.23589
Aves	Amazona_collaria	37	0.0956325	0.225815
Aves	Amazona_collaria	38	0.0986948	0.233046
Aves	Amazona_collaria	39	0.0958333	0.226289
Aves	Amazona_collaria	40	0.1	0.236128
Aves	Amazona_collaria	41	0.100452	0.237194
Aves	Amazona_collaria	42	0.0991968	0.234231
Aves	Amazona_collaria	43	0.0942771	0.222614
Aves	Amazona_collaria	44	0.0980924	0.231623
Aves	Amazona_collaria	45	0.0968373	0.22866
Aves	Amazona_collaria	46	0.0942771	0.222614
Aves	Amazona_collaria	47	0.0955321	0.225578
Aves	Amazona_collaria	48	0.0927711	0.219058
Aves	Amazona_collaria	49	0.0949297	0.224155
Aves	Amazona_collaria	50	0.0932229	0.220125
Aves	Amazona_collaria	51	0.0951807	0.224748
Aves	Amazona_collaria	52	0.090261	0.213131
Aves	Amazona_collaria	53	0.0934739	0.220718
Aves	Amazona_collaria	54	0.0915663	0.216213
Aves	Amazona_collaria	55	0.0909639	0.214791
Aves	Amazona_collaria	56	0.090261	0.213131
Aves	Amazona_collaria	57	0.0974398	0.230082
Aves	Amazona_collaria	58	0.114307	0.269911
Aves	Amazona_collaria	59	0.120833	0.285321
Aves	Amazona_collaria	60	0.127108	0.300138
Aves	Amazona_collaria	61	0.126606	0.298953
Aves	Amazona_collaria	62	0.123544	0.291722
Aves	Amazona_collaria	63	0.12239	0.288995
Aves	Amazona_collaria	64	0.125653	0.2967
Aves	Amazona_collaria	65	0.123695	0.292077
Aves	Amazona_collaria	66	0.128564	0.303576
Aves	Amazona_collaria	67	0.132329	0.312466
Aves	Amazona_collaria	68	0.13248	0.312822
Aves	Amazona_collaria	69	0.133434	0.315074
Aves	Amazona_collaria	70	0.135442	0.319815
Aves	Amazona_collaria	71	0.131124	0.309621
Aves	Amazona_collaria	72	0.13504	0.318867
Aves	Amazona_collaria	73	0.124398	0.293737
Aves	Amazona_collaria	74	0.123996	0.292789
Aves	Amazona_collaria	75	0.125351	0.295989
Aves	Amazona_collaria	76	0.130171	0.307369
Aves	Amazona_collaria	77	0.125402	0.296108
Aves	Amazona_collaria	78	0.124448	0.293855
Aves	Amazona_collaria	79	0.116466	0.275008
Aves	Amazona_collaria	80	0.119076	0.281172
Aves	Amazona_collaria	81	0.120231	0.283898
Aves	Amazona_collaria	82	0.118373	0.279512
Aves	Amazona_collaria	83	0.116215	0.274415
Aves	Amazona_collaria	84	0.110392	0.260665
Aves	Amazona_collaria	85	0.114056	0.269318
Aves	Amazona_collaria	86	0.115663	0.273111
Aves	Amazona_collaria	87	0.114357	0.270029
Aves	Amazona_collaria	88	0.103112	0.243477
Aves	Amazona_collaria	89	0.107229	0.253197
Aves	Amazona_collaria	90	0.107631	0.254145
Aves	Amazona_collaria	91	0.104116	0.245848
Aves	Amazona_collaria	92	0.100201	0.236602
Aves	Amazona_collaria	93	0.0957831	0.22617
Aves	Amazona_collaria	94	0.0929719	0.219532
Aves	Amazona_collaria	95	0.0896084	0.21159
Aves	Amazona_collaria	96	0.0866968	0.204715
Aves	Amazona_collaria	97	0.0876506	0.206967
Aves	Amazona_collaria	98	0.0817771	0.193098
Aves	Amazona_collaria	99	0.0811747	0.191676
Aves	Amazona_collaria	100	0.134187	0.316852
Aves	Apteryx_haastii	1	0.16014	0.386905
Aves	Apteryx_haastii	2	0.102748	0.248244
Aves	Apteryx_haastii	3	0.112718	0.272331
Aves	Apteryx_haastii	4	0.119095	0.287738
Aves	Apteryx_haastii	5	0.126639	0.305966
Aves	Apteryx_haastii	6	0.128795	0.311173
Aves	Apteryx_haastii	7	0.133016	0.321372
Aves	Apteryx_haastii	8	0.13131	0.317249
Aves	Apteryx_haastii	9	0.132297	0.319636
Aves	Apteryx_haastii	10	0.132297	0.319636
Aves	Apteryx_haastii	11	0.125292	0.302711
Aves	Apteryx_haastii	12	0.122597	0.296201
Aves	Apteryx_haastii	13	0.123675	0.298805
Aves	Apteryx_haastii	14	0.125741	0.303796
Aves	Apteryx_haastii	15	0.12601	0.304447
Aves	Apteryx_haastii	16	0.123945	0.299456
Aves	Apteryx_haastii	17	0.127268	0.307484
Aves	Apteryx_haastii	18	0.127088	0.30705
Aves	Apteryx_haastii	19	0.126549	0.305749
Aves	Apteryx_haastii	20	0.123226	0.29772
Aves	Apteryx_haastii	21	0.118017	0.285134
Aves	Apteryx_haastii	22	0.113347	0.27385
Aves	Apteryx_haastii	23	0.102748	0.248244
Aves	Apteryx_haastii	24	0.0994252	0.240215
Aves	Apteryx_haastii	25	0.0963715	0.232838
Aves	Apteryx_haastii	26	0.09224	0.222856
Aves	Apteryx_haastii	27	0.0896354	0.216563
Aves	Apteryx_haastii	28	0.093677	0.226328
Aves	Apteryx_haastii	29	0.0981678	0.237178
Aves	Apteryx_haastii	30	0.0952937	0.230234
Aves	Apteryx_haastii	31	0.0925992	0.223724
Aves	Apteryx_haastii	32	0.0923298	0.223073
Aves	Apteryx_haastii	33	0.0907131	0.219167
Aves	Apteryx_haastii	34	0.0873002	0.210921
Aves	Apteryx_haastii	35	0.0853242	0.206147
Aves	Apteryx_haastii	36	0.0925094	0.223507
Aves	Apteryx_haastii	37	0.09224	0.222856
Aves	Apteryx_haastii	38	0.0916113	0.221337
Aves	Apteryx_haastii	39	0.0955631	0.230885
Aves	Apteryx_haastii	40	0.0865816	0.209185
Aves	Apteryx_haastii	41	0.0909826	0.219818
Aves	Apteryx_haastii	42	0.0934974	0.225894
Aves	Apteryx_haastii	43	0.0925992	0.223724
Aves	Apteryx_haastii	44	0.0939465	0.226979
Aves	Apteryx_haastii	45	0.0905335	0.218733
Aves	Apteryx_haastii	46	0.080115	0.193561
Aves	Apteryx_haastii	47	0.0772409	0.186617
Aves	Apteryx_haastii	48	0.074277	0.179456
Aves	Apteryx_haastii	49	0.0784983	0.189655
Aves	Apteryx_haastii	50	0.0738279	0.178371
Aves	Apteryx_haastii	51	0.0755344	0.182494
Aves	Apteryx_haastii	52	0.0753548	0.18206
Aves	Apteryx_haastii	53	0.0792168	0.191391
Aves	Apteryx_haastii	54	0.0845159	0.204194
Aves	Apteryx_haastii	55	0.0823603	0.198986
Aves	Apteryx_haastii	56	0.0816418	0.19725
Aves	Apteryx_haastii	57	0.0761631	0.184013
Aves	Apteryx_haastii	58	0.0806539	0.194863
Aves	Apteryx_haastii	59	0.0793066	0.191608
Aves	Apteryx_haastii	60	0.0783187	0.189221
Aves	Apteryx_haastii	61	0.0778696	0.188136
Aves	Apteryx_haastii	62	0.0739177	0.178588
Aves	Apteryx_haastii	63	0.0743668	0.179673
Aves	Apteryx_haastii	64	0.0784085	0.189438
Aves	Apteryx_haastii	65	0.0774205	0.187051
Aves	Apteryx_haastii	66	0.0760733	0.183796
Aves	Apteryx_haastii	67	0.0772409	0.186617
Aves	Apteryx_haastii	68	0.0745464	0.180107
Aves	Apteryx_haastii	69	0.0729298	0.176201
Aves	Apteryx_haastii	70	0.0687983	0.16622
Aves	Apteryx_haastii	71	0.064577	0.156021
Aves	Apteryx_haastii	72	0.0639483	0.154502
Aves	Apteryx_haastii	73	0.0634992	0.153417
Aves	Apteryx_haastii	74	0.062601	0.151247
Aves	Apteryx_haastii	75	0.059727	0.144303
Aves	Apteryx_haastii	76	0.060176	0.145388
Aves	Apteryx_haastii	77	0.0590084	0.142567
Aves	Apteryx_haastii	78	0.0594575	0.143652
Aves	Apteryx_haastii	79	0.0614334	0.148426
Aves	Apteryx_haastii	80	0.062152	0.150162
Aves	Apteryx_haastii	81	0.0618825	0.149511
Aves	Apteryx_haastii	82	0.0606251	0.146473
Aves	Apteryx_haastii	83	0.0560445	0.135406
Aves	Apteryx_haastii	84	0.062601	0.151247
Aves	Apteryx_haastii	85	0.0610742	0.147558
Aves	Apteryx_haastii	86	0.0595473	0.143869
Aves	Apteryx_haastii	87	0.0596371	0.144086
Aves	Apteryx_haastii	88	0.0605353	0.146256
Aves	Apteryx_haastii	89	0.060176	0.145388
Aves	Apteryx_haastii	90	0.0565834	0.136708
Aves	Apteryx_haastii	91	0.0599964	0.144954
Aves	Apteryx_haastii	92	0.0578408	0.139746
Aves	Apteryx_haastii	93	0.0574816	0.138878
Aves	Apteryx_haastii	94	0.0561344	0.135623
Aves	Apteryx_haastii	95	0.0528112	0.127594
Aves	Apteryx_haastii	96	0.0482306	0.116527
Aves	Apteryx_haastii	97	0.0483205	0.116744
Aves	Apteryx_haastii	98	0.0472427	0.11414
Aves	Apteryx_haastii	99	0.0433806	0.104809
Aves	Apteryx_haastii	100	0.0722112	0.174465
Aves	Gallus_gallus	1	0.143614	0.340318
Aves	Gallus_gallus	2	0.0783712	0.185714
Aves	Gallus_gallus	3	0.0750314	0.1778
Aves	Gallus_gallus	4	0.0737589	0.174784
Aves	Gallus_gallus	5	0.0702849	0.166552
Aves	Gallus_gallus	6	0.0700111	0.165903
Aves	Gallus_gallus	7	0.0694097	0.164478
Aves	Gallus_gallus	8	0.0698607	0.165547
Aves	Gallus_gallus	9	0.068121	0.161424
Aves	Gallus_gallus	10	0.0667358	0.158142
Aves	Gallus_gallus	11	0.0674338	0.159796
Aves	Gallus_gallus	12	0.0667841	0.158256
Aves	Gallus_gallus	13	0.0657371	0.155775
Aves	Gallus_gallus	14	0.0670418	0.158867
Aves	Gallus_gallus	15	0.0639705	0.151589
Aves	Gallus_gallus	16	0.0643464	0.15248
Aves	Gallus_gallus	17	0.06309	0.149502
Aves	Gallus_gallus	18	0.0626873	0.148548
Aves	Gallus_gallus	19	0.0639974	0.151653
Aves	Gallus_gallus	20	0.0655223	0.155266
Aves	Gallus_gallus	21	0.067219	0.159287
Aves	Gallus_gallus	22	0.0663975	0.15734
Aves	Gallus_gallus	23	0.0654954	0.155202
Aves	Gallus_gallus	24	0.0680996	0.161373
Aves	Gallus_gallus	25	0.0670418	0.158867
Aves	Gallus_gallus	26	0.0652753	0.154681
Aves	Gallus_gallus	27	0.0662955	0.157098
Aves	Gallus_gallus	28	0.0651035	0.154274
Aves	Gallus_gallus	29	0.0627141	0.148612
Aves	Gallus_gallus	30	0.063498	0.150469
Aves	Gallus_gallus	31	0.0656995	0.155686
Aves	Gallus_gallus	32	0.0648296	0.153625
Aves	Gallus_gallus	33	0.0631437	0.14963
Aves	Gallus_gallus	34	0.0644591	0.152747
Aves	Gallus_gallus	35	0.0636806	0.150902
Aves	Gallus_gallus	36	0.0649585	0.15393
Aves	Gallus_gallus	37	0.0658498	0.156042
Aves	Gallus_gallus	38	0.0674499	0.159834
Aves	Gallus_gallus	39	0.0629718	0.149222
Aves	Gallus_gallus	40	0.0626711	0.14851
Aves	Gallus_gallus	41	0.0645934	0.153065
Aves	Gallus_gallus	42	0.0642981	0.152365
Aves	Gallus_gallus	43	0.0657317	0.155762
Aves	Gallus_gallus	44	0.0652001	0.154503
Aves	Gallus_gallus	45	0.0660216	0.156449
Aves	Gallus_gallus	46	0.0654203	0.155024
Aves	Gallus_gallus	47	0.0645773	0.153027
Aves	Gallus_gallus	48	0.0642175	0.152174
Aves	Gallus_gallus	49	0.0650122	0.154057
Aves	Gallus_gallus	50	0.0646202	0.153128
Aves	Gallus_gallus	51	0.0627248	0.148637
Aves	Gallus_gallus	52	0.0630416	0.149388
Aves	Gallus_gallus	53	0.0616939	0.146194
Aves	Gallus_gallus	54	0.0609154	0.144349
Aves	Gallus_gallus	55	0.0638148	0.15122
Aves	Gallus_gallus	56	0.0630577	0.149426
Aves	Gallus_gallus	57	0.0630685	0.149451
Aves	Gallus_gallus	58	0.0641585	0.152034
Aves	Gallus_gallus	59	0.0647706	0.153485
Aves	Gallus_gallus	60	0.0665854	0.157785
Aves	Gallus_gallus	61	0.064878	0.153739
Aves	Gallus_gallus	62	0.0626819	0.148535
Aves	Gallus_gallus	63	0.0628698	0.148981
Aves	Gallus_gallus	64	0.0635893	0.150686
Aves	Gallus_gallus	65	0.0651894	0.154477
Aves	Gallus_gallus	66	0.0655652	0.155368
Aves	Gallus_gallus	67	0.0656511	0.155571
Aves	Gallus_gallus	68	0.0627732	0.148752
Aves	Gallus_gallus	69	0.0617422	0.146309
Aves	Gallus_gallus	70	0.0618496	0.146563
Aves	Gallus_gallus	71	0.0624242	0.147925
Aves	Gallus_gallus	72	0.0608295	0.144146
Aves	Gallus_gallus	73	0.0647061	0.153332
Aves	Gallus_gallus	74	0.0656136	0.155482
Aves	Gallus_gallus	75	0.0651679	0.154426
Aves	Gallus_gallus	76	0.0638524	0.151309
Aves	Gallus_gallus	77	0.064937	0.153879
Aves	Gallus_gallus	78	0.0649692	0.153956
Aves	Gallus_gallus	79	0.0671653	0.159159
Aves	Gallus_gallus	80	0.0664136	0.157378
Aves	Gallus_gallus	81	0.0644216	0.152658
Aves	Gallus_gallus	82	0.0638309	0.151258
Aves	Gallus_gallus	83	0.0653988	0.154973
Aves	Gallus_gallus	84	0.0652484	0.154617
Aves	Gallus_gallus	85	0.0643034	0.152378
Aves	Gallus_gallus	86	0.0628537	0.148942
Aves	Gallus_gallus	87	0.0597985	0.141703
Aves	Gallus_gallus	88	0.0598146	0.141741
Aves	Gallus_gallus	89	0.0597878	0.141677
Aves	Gallus_gallus	90	0.0598469	0.141817
Aves	Gallus_gallus	91	0.061898	0.146678
Aves	Gallus_gallus	92	0.058875	0.139514
Aves	Gallus_gallus	93	0.058177	0.13786
Aves	Gallus_gallus	94	0.057334	0.135863
Aves	Gallus_gallus	95	0.0566467	0.134234
Aves	Gallus_gallus	96	0.0588965	0.139565
Aves	Gallus_gallus	97	0.0597985	0.141703
Aves	Gallus_gallus	98	0.058569	0.138789
Aves	Gallus_gallus	99	0.0591542	0.140176
Aves	Gallus_gallus	100	0.0986029	0.233656
Aves	Corvus_moneduloides	1	0.253154	0.594678
Aves	Corvus_moneduloides	2	0.149988	0.352333
Aves	Corvus_moneduloides	3	0.147637	0.346811
Aves	Corvus_moneduloides	4	0.144159	0.338641
Aves	Corvus_moneduloides	5	0.145119	0.340894
Aves	Corvus_moneduloides	6	0.143704	0.33757
Aves	Corvus_moneduloides	7	0.138978	0.32647
Aves	Corvus_moneduloides	8	0.134781	0.316609
Aves	Corvus_moneduloides	9	0.135284	0.317792
Aves	Corvus_moneduloides	10	0.131159	0.308101
Aves	Corvus_moneduloides	11	0.131494	0.30889
Aves	Corvus_moneduloides	12	0.133149	0.312778
Aves	Corvus_moneduloides	13	0.135404	0.318074
Aves	Corvus_moneduloides	14	0.134061	0.314919
Aves	Corvus_moneduloides	15	0.139386	0.327428
Aves	Corvus_moneduloides	16	0.140393	0.329794
Aves	Corvus_moneduloides	17	0.144615	0.339711
Aves	Corvus_moneduloides	18	0.143056	0.336049
Aves	Corvus_moneduloides	19	0.142672	0.335147
Aves	Corvus_moneduloides	20	0.144735	0.339993
Aves	Corvus_moneduloides	21	0.144831	0.340218
Aves	Corvus_moneduloides	22	0.148069	0.347825
Aves	Corvus_moneduloides	23	0.145023	0.340669
Aves	Corvus_moneduloides	24	0.147517	0.346529
Aves	Corvus_moneduloides	25	0.144255	0.338866
Aves	Corvus_moneduloides	26	0.136915	0.321624
Aves	Corvus_moneduloides	27	0.13905	0.326639
Aves	Corvus_moneduloides	28	0.137707	0.323483
Aves	Corvus_moneduloides	29	0.13953	0.327766
Aves	Corvus_moneduloides	30	0.136795	0.321342
Aves	Corvus_moneduloides	31	0.136771	0.321286
Aves	Corvus_moneduloides	32	0.139218	0.327033
Aves	Corvus_moneduloides	33	0.145119	0.340894
Aves	Corvus_moneduloides	34	0.145431	0.341627
Aves	Corvus_moneduloides	35	0.146174	0.343374
Aves	Corvus_moneduloides	36	0.143656	0.337457
Aves	Corvus_moneduloides	37	0.144519	0.339486
Aves	Corvus_moneduloides	38	0.144159	0.338641
Aves	Corvus_moneduloides	39	0.145215	0.34112
Aves	Corvus_moneduloides	40	0.146654	0.344501
Aves	Corvus_moneduloides	41	0.146798	0.344839
Aves	Corvus_moneduloides	42	0.147733	0.347036
Aves	Corvus_moneduloides	43	0.14591	0.342754
Aves	Corvus_moneduloides	44	0.147661	0.346867
Aves	Corvus_moneduloides	45	0.145455	0.341683
Aves	Corvus_moneduloides	46	0.151907	0.35684
Aves	Corvus_moneduloides	47	0.146798	0.344839
Aves	Corvus_moneduloides	48	0.147278	0.345966
Aves	Corvus_moneduloides	49	0.156632	0.367941
Aves	Corvus_moneduloides	50	0.15361	0.360841
Aves	Corvus_moneduloides	51	0.147661	0.346867
Aves	Corvus_moneduloides	52	0.141809	0.333119
Aves	Corvus_moneduloides	53	0.147853	0.347318
Aves	Corvus_moneduloides	54	0.142672	0.335147
Aves	Corvus_moneduloides	55	0.142576	0.334922
Aves	Corvus_moneduloides	56	0.141569	0.332555
Aves	Corvus_moneduloides	57	0.137803	0.323709
Aves	Corvus_moneduloides	58	0.145742	0.342359
Aves	Corvus_moneduloides	59	0.144519	0.339486
Aves	Corvus_moneduloides	60	0.14639	0.343881
Aves	Corvus_moneduloides	61	0.14994	0.35222
Aves	Corvus_moneduloides	62	0.15018	0.352783
Aves	Corvus_moneduloides	63	0.148909	0.349797
Aves	Corvus_moneduloides	64	0.151379	0.355601
Aves	Corvus_moneduloides	65	0.148165	0.34805
Aves	Corvus_moneduloides	66	0.157448	0.369856
Aves	Corvus_moneduloides	67	0.162725	0.382252
Aves	Corvus_moneduloides	68	0.162845	0.382534
Aves	Corvus_moneduloides	69	0.153826	0.361348
Aves	Corvus_moneduloides	70	0.150828	0.354305
Aves	Corvus_moneduloides	71	0.144351	0.339091
Aves	Corvus_moneduloides	72	0.142912	0.335711
Aves	Corvus_moneduloides	73	0.140657	0.330414
Aves	Corvus_moneduloides	74	0.141833	0.333175
Aves	Corvus_moneduloides	75	0.144591	0.339655
Aves	Corvus_moneduloides	76	0.137371	0.322695
Aves	Corvus_moneduloides	77	0.144063	0.338415
Aves	Corvus_moneduloides	78	0.142792	0.335429
Aves	Corvus_moneduloides	79	0.143464	0.337006
Aves	Corvus_moneduloides	80	0.138762	0.325963
Aves	Corvus_moneduloides	81	0.148213	0.348163
Aves	Corvus_moneduloides	82	0.148237	0.348219
Aves	Corvus_moneduloides	83	0.145143	0.340951
Aves	Corvus_moneduloides	84	0.145047	0.340725
Aves	Corvus_moneduloides	85	0.150348	0.353178
Aves	Corvus_moneduloides	86	0.148645	0.349177
Aves	Corvus_moneduloides	87	0.149652	0.351544
Aves	Corvus_moneduloides	88	0.141233	0.331766
Aves	Corvus_moneduloides	89	0.135236	0.31768
Aves	Corvus_moneduloides	90	0.133629	0.313905
Aves	Corvus_moneduloides	91	0.13845	0.32523
Aves	Corvus_moneduloides	92	0.138522	0.325399
Aves	Corvus_moneduloides	93	0.141377	0.332104
Aves	Corvus_moneduloides	94	0.137347	0.322638
Aves	Corvus_moneduloides	95	0.129384	0.303931
Aves	Corvus_moneduloides	96	0.124154	0.291648
Aves	Corvus_moneduloides	97	0.116551	0.273786
Aves	Corvus_moneduloides	98	0.10782	0.253276
Aves	Corvus_moneduloides	99	0.101007	0.237274
Aves	Corvus_moneduloides	100	0.173951	0.408622
Aves	Calidris_pugnax	1	0.195986	0.461688
Aves	Calidris_pugnax	2	0.118571	0.279318
Aves	Calidris_pugnax	3	0.117752	0.27739
Aves	Calidris_pugnax	4	0.121991	0.287376
Aves	Calidris_pugnax	5	0.122319	0.288148
Aves	Calidris_pugnax	6	0.11697	0.275547
Aves	Calidris_pugnax	7	0.119044	0.280433
Aves	Calidris_pugnax	8	0.121027	0.285105
Aves	Calidris_pugnax	9	0.124156	0.292476
Aves	Calidris_pugnax	10	0.12321	0.290248
Aves	Calidris_pugnax	11	0.12372	0.291448
Aves	Calidris_pugnax	12	0.124611	0.293548
Aves	Calidris_pugnax	13	0.12623	0.297362
Aves	Calidris_pugnax	14	0.126649	0.298348
Aves	Calidris_pugnax	15	0.127122	0.299463
Aves	Calidris_pugnax	16	0.129705	0.305549
Aves	Calidris_pugnax	17	0.133053	0.313435
Aves	Calidris_pugnax	18	0.132089	0.311163
Aves	Calidris_pugnax	19	0.129687	0.305506
Aves	Calidris_pugnax	20	0.126321	0.297577
Aves	Calidris_pugnax	21	0.128759	0.30332
Aves	Calidris_pugnax	22	0.13309	0.313521
Aves	Calidris_pugnax	23	0.12754	0.300448
Aves	Calidris_pugnax	24	0.128214	0.302034
Aves	Calidris_pugnax	25	0.127286	0.299848
Aves	Calidris_pugnax	26	0.127013	0.299205
Aves	Calidris_pugnax	27	0.123501	0.290933
Aves	Calidris_pugnax	28	0.119972	0.282619
Aves	Calidris_pugnax	29	0.119553	0.281633
Aves	Calidris_pugnax	30	0.120736	0.284419
Aves	Calidris_pugnax	31	0.123228	0.290291
Aves	Calidris_pugnax	32	0.123683	0.291362
Aves	Calidris_pugnax	33	0.124102	0.292348
Aves	Calidris_pugnax	34	0.120154	0.283047
Aves	Calidris_pugnax	35	0.121391	0.285962
Aves	Calidris_pugnax	36	0.116624	0.274732
Aves	Calidris_pugnax	37	0.115532	0.272161
Aves	Calidris_pugnax	38	0.116442	0.274304
Aves	Calidris_pugnax	39	0.11717	0.276018
Aves	Calidris_pugnax	40	0.120608	0.284119
Aves	Calidris_pugnax	41	0.122428	0.288405
Aves	Calidris_pugnax	42	0.123683	0.291362
Aves	Calidris_pugnax	43	0.122464	0.28849
Aves	Calidris_pugnax	44	0.118971	0.280261
Aves	Calidris_pugnax	45	0.118898	0.28009
Aves	Calidris_pugnax	46	0.11666	0.274818
Aves	Calidris_pugnax	47	0.110747	0.260889
Aves	Calidris_pugnax	48	0.112039	0.263932
Aves	Calidris_pugnax	49	0.111675	0.263075
Aves	Calidris_pugnax	50	0.113367	0.26706
Aves	Calidris_pugnax	51	0.111912	0.263632
Aves	Calidris_pugnax	52	0.114968	0.270832
Aves	Calidris_pugnax	53	0.117843	0.277604
Aves	Calidris_pugnax	54	0.119408	0.28129
Aves	Calidris_pugnax	55	0.118061	0.278118
Aves	Calidris_pugnax	56	0.121482	0.286176
Aves	Calidris_pugnax	57	0.120445	0.283733
Aves	Calidris_pugnax	58	0.120445	0.283733
Aves	Calidris_pugnax	59	0.121336	0.285833
Aves	Calidris_pugnax	60	0.119408	0.28129
Aves	Calidris_pugnax	61	0.118389	0.27889
Aves	Calidris_pugnax	62	0.116024	0.273318
Aves	Calidris_pugnax	63	0.119371	0.281204
Aves	Calidris_pugnax	64	0.124738	0.293848
Aves	Calidris_pugnax	65	0.126904	0.298948
Aves	Calidris_pugnax	66	0.124484	0.293248
Aves	Calidris_pugnax	67	0.122355	0.288233
Aves	Calidris_pugnax	68	0.118898	0.28009
Aves	Calidris_pugnax	69	0.114786	0.270404
Aves	Calidris_pugnax	70	0.112439	0.264875
Aves	Calidris_pugnax	71	0.111784	0.263332
Aves	Calidris_pugnax	72	0.113731	0.267918
Aves	Calidris_pugnax	73	0.114313	0.269289
Aves	Calidris_pugnax	74	0.116988	0.27559
Aves	Calidris_pugnax	75	0.114259	0.269161
Aves	Calidris_pugnax	76	0.11415	0.268903
Aves	Calidris_pugnax	77	0.114859	0.270575
Aves	Calidris_pugnax	78	0.118989	0.280304
Aves	Calidris_pugnax	79	0.11797	0.277904
Aves	Calidris_pugnax	80	0.116697	0.274904
Aves	Calidris_pugnax	81	0.118389	0.27889
Aves	Calidris_pugnax	82	0.11999	0.282662
Aves	Calidris_pugnax	83	0.117861	0.277647
Aves	Calidris_pugnax	84	0.11757	0.276961
Aves	Calidris_pugnax	85	0.117643	0.277133
Aves	Calidris_pugnax	86	0.119499	0.281504
Aves	Calidris_pugnax	87	0.117152	0.275975
Aves	Calidris_pugnax	88	0.115914	0.273061
Aves	Calidris_pugnax	89	0.11737	0.27649
Aves	Calidris_pugnax	90	0.113167	0.266589
Aves	Calidris_pugnax	91	0.108309	0.255145
Aves	Calidris_pugnax	92	0.102887	0.242373
Aves	Calidris_pugnax	93	0.0998672	0.235258
Aves	Calidris_pugnax	94	0.0967378	0.227886
Aves	Calidris_pugnax	95	0.0968834	0.228229
Aves	Calidris_pugnax	96	0.0981751	0.231272
Aves	Calidris_pugnax	97	0.0940815	0.221629
Aves	Calidris_pugnax	98	0.0909703	0.2143
Aves	Calidris_pugnax	99	0.0847661	0.199685
Aves	Calidris_pugnax	100	0.134927	0.31785
Aves	Geospiza_fortis	1	0.0809476	0.194585
Aves	Geospiza_fortis	2	0.0547251	0.131551
Aves	Geospiza_fortis	3	0.0536272	0.128912
Aves	Geospiza_fortis	4	0.0574698	0.138149
Aves	Geospiza_fortis	5	0.0559919	0.134596
Aves	Geospiza_fortis	6	0.0507136	0.121908
Aves	Geospiza_fortis	7	0.0500802	0.120385
Aves	Geospiza_fortis	8	0.0472933	0.113686
Aves	Geospiza_fortis	9	0.0480111	0.115411
Aves	Geospiza_fortis	10	0.0494891	0.118964
Aves	Geospiza_fortis	11	0.0470399	0.113077
Aves	Geospiza_fortis	12	0.0505447	0.121502
Aves	Geospiza_fortis	13	0.0490246	0.117848
Aves	Geospiza_fortis	14	0.048349	0.116223
Aves	Geospiza_fortis	15	0.0477578	0.114802
Aves	Geospiza_fortis	16	0.0464066	0.111554
Aves	Geospiza_fortis	17	0.0466177	0.112062
Aves	Geospiza_fortis	18	0.0471666	0.113381
Aves	Geospiza_fortis	19	0.0476311	0.114498
Aves	Geospiza_fortis	20	0.0467444	0.112366
Aves	Geospiza_fortis	21	0.0471244	0.11328
Aves	Geospiza_fortis	22	0.0458154	0.110133
Aves	Geospiza_fortis	23	0.0458154	0.110133
Aves	Geospiza_fortis	24	0.0447175	0.107494
Aves	Geospiza_fortis	25	0.042564	0.102317
Aves	Geospiza_fortis	26	0.0435774	0.104753
Aves	Geospiza_fortis	27	0.0423528	0.10181
Aves	Geospiza_fortis	28	0.0452242	0.108712
Aves	Geospiza_fortis	29	0.046491	0.111757
Aves	Geospiza_fortis	30	0.0467444	0.112366
Aves	Geospiza_fortis	31	0.0480534	0.115513
Aves	Geospiza_fortis	32	0.0487712	0.117239
Aves	Geospiza_fortis	33	0.0481378	0.115716
Aves	Geospiza_fortis	34	0.0453931	0.109118
Aves	Geospiza_fortis	35	0.0427751	0.102825
Aves	Geospiza_fortis	36	0.0437885	0.105261
Aves	Geospiza_fortis	37	0.0431129	0.103637
Aves	Geospiza_fortis	38	0.0407905	0.098054
Aves	Geospiza_fortis	39	0.039017	0.0937908
Aves	Geospiza_fortis	40	0.0401571	0.0965314
Aves	Geospiza_fortis	41	0.0397348	0.0955164
Aves	Geospiza_fortis	42	0.0404527	0.097242
Aves	Geospiza_fortis	43	0.040326	0.0969375
Aves	Geospiza_fortis	44	0.0392281	0.0942983
Aves	Geospiza_fortis	45	0.0391859	0.0941968
Aves	Geospiza_fortis	46	0.0339921	0.0817117
Aves	Geospiza_fortis	47	0.0316274	0.0760274
Aves	Geospiza_fortis	48	0.0303606	0.0729822
Aves	Geospiza_fortis	49	0.0328097	0.0788695
Aves	Geospiza_fortis	50	0.0322608	0.07755
Aves	Geospiza_fortis	51	0.0309096	0.0743018
Aves	Geospiza_fortis	52	0.0356811	0.0857719
Aves	Geospiza_fortis	53	0.0353855	0.0850614
Aves	Geospiza_fortis	54	0.0350477	0.0842493
Aves	Geospiza_fortis	55	0.0347521	0.0835388
Aves	Geospiza_fortis	56	0.0374124	0.0899336
Aves	Geospiza_fortis	57	0.0361034	0.0867869
Aves	Geospiza_fortis	58	0.0357656	0.0859749
Aves	Geospiza_fortis	59	0.0349633	0.0840463
Aves	Geospiza_fortis	60	0.0358922	0.0862794
Aves	Geospiza_fortis	61	0.0353433	0.0849599
Aves	Geospiza_fortis	62	0.0365256	0.087802
Aves	Geospiza_fortis	63	0.0350055	0.0841478
Aves	Geospiza_fortis	64	0.0342032	0.0822192
Aves	Geospiza_fortis	65	0.0333164	0.0800876
Aves	Geospiza_fortis	66	0.0332742	0.0799861
Aves	Geospiza_fortis	67	0.0331898	0.0797831
Aves	Geospiza_fortis	68	0.0353011	0.0848583
Aves	Geospiza_fortis	69	0.0346677	0.0833358
Aves	Geospiza_fortis	70	0.0353855	0.0850614
Aves	Geospiza_fortis	71	0.0340343	0.0818132
Aves	Geospiza_fortis	72	0.0338654	0.0814072
Aves	Geospiza_fortis	73	0.0342032	0.0822192
Aves	Geospiza_fortis	74	0.0340765	0.0819147
Aves	Geospiza_fortis	75	0.0330209	0.0793771
Aves	Geospiza_fortis	76	0.0344988	0.0829297
Aves	Geospiza_fortis	77	0.0344988	0.0829297
Aves	Geospiza_fortis	78	0.0347944	0.0836403
Aves	Geospiza_fortis	79	0.0345832	0.0831328
Aves	Geospiza_fortis	80	0.0340765	0.0819147
Aves	Geospiza_fortis	81	0.0359767	0.0864824
Aves	Geospiza_fortis	82	0.0360189	0.0865839
Aves	Geospiza_fortis	83	0.03623	0.0870915
Aves	Geospiza_fortis	84	0.0306562	0.0736928
Aves	Geospiza_fortis	85	0.0321341	0.0772455
Aves	Geospiza_fortis	86	0.0319652	0.0768394
Aves	Geospiza_fortis	87	0.0312051	0.0750123
Aves	Geospiza_fortis	88	0.0302339	0.0726777
Aves	Geospiza_fortis	89	0.0297694	0.0715612
Aves	Geospiza_fortis	90	0.029685	0.0713582
Aves	Geospiza_fortis	91	0.0298961	0.0718657
Aves	Geospiza_fortis	92	0.0283338	0.06811
Aves	Geospiza_fortis	93	0.027827	0.0668919
Aves	Geospiza_fortis	94	0.0282493	0.067907
Aves	Geospiza_fortis	95	0.0279537	0.0671964
Aves	Geospiza_fortis	96	0.0282915	0.0680085
Aves	Geospiza_fortis	97	0.0275315	0.0661814
Aves	Geospiza_fortis	98	0.0273626	0.0657754
Aves	Geospiza_fortis	99	0.0249979	0.0600911
Aves	Geospiza_fortis	100	0.0414661	0.0996781
Aves	Parus_major	1	0.199447	0.482107
Aves	Parus_major	2	0.116434	0.281446
Aves	Parus_major	3	0.117063	0.282966
Aves	Parus_major	4	0.116906	0.282586
Aves	Parus_major	5	0.115873	0.280089
Aves	Parus_major	6	0.11594	0.280252
Aves	Parus_major	7	0.118927	0.287472
Aves	Parus_major	8	0.122588	0.296322
Aves	Parus_major	9	0.123599	0.298765
Aves	Parus_major	10	0.12598	0.30452
Aves	Parus_major	11	0.125912	0.304357
Aves	Parus_major	12	0.126474	0.305714
Aves	Parus_major	13	0.127148	0.307343
Aves	Parus_major	14	0.129641	0.313369
Aves	Parus_major	15	0.124902	0.301914
Aves	Parus_major	16	0.128091	0.309623
Aves	Parus_major	17	0.126092	0.304791
Aves	Parus_major	18	0.129214	0.312338
Aves	Parus_major	19	0.127507	0.308212
Aves	Parus_major	20	0.122386	0.295833
Aves	Parus_major	21	0.123936	0.299579
Aves	Parus_major	22	0.120477	0.291218
Aves	Parus_major	23	0.119871	0.289753
Aves	Parus_major	24	0.119713	0.289373
Aves	Parus_major	25	0.114413	0.27656
Aves	Parus_major	26	0.115289	0.278677
Aves	Parus_major	27	0.114458	0.276668
Aves	Parus_major	28	0.115648	0.279546
Aves	Parus_major	29	0.115581	0.279383
Aves	Parus_major	30	0.112953	0.273031
Aves	Parus_major	31	0.116996	0.282803
Aves	Parus_major	32	0.113065	0.273302
Aves	Parus_major	33	0.11028	0.26657
Aves	Parus_major	34	0.106597	0.257666
Aves	Parus_major	35	0.107854	0.260707
Aves	Parus_major	36	0.109763	0.265321
Aves	Parus_major	37	0.112908	0.272922
Aves	Parus_major	38	0.112796	0.272651
Aves	Parus_major	39	0.11448	0.276723
Aves	Parus_major	40	0.118635	0.286767
Aves	Parus_major	41	0.119466	0.288775
Aves	Parus_major	42	0.119444	0.288721
Aves	Parus_major	43	0.121443	0.293553
Aves	Parus_major	44	0.122251	0.295507
Aves	Parus_major	45	0.118366	0.286115
Aves	Parus_major	46	0.115401	0.278949
Aves	Parus_major	47	0.114503	0.276777
Aves	Parus_major	48	0.115176	0.278406
Aves	Parus_major	49	0.118231	0.285789
Aves	Parus_major	50	0.115468	0.279111
Aves	Parus_major	51	0.115064	0.278134
Aves	Parus_major	52	0.119354	0.288504
Aves	Parus_major	53	0.115648	0.279546
Aves	Parus_major	54	0.114637	0.277103
Aves	Parus_major	55	0.117086	0.28302
Aves	Parus_major	56	0.114278	0.276234
Aves	Parus_major	57	0.112683	0.272379
Aves	Parus_major	58	0.111403	0.269285
Aves	Parus_major	59	0.107922	0.26087
Aves	Parus_major	60	0.106933	0.258481
Aves	Parus_major	61	0.106237	0.256798
Aves	Parus_major	62	0.10882	0.263041
Aves	Parus_major	63	0.109674	0.265104
Aves	Parus_major	64	0.11174	0.270099
Aves	Parus_major	65	0.114615	0.277048
Aves	Parus_major	66	0.118545	0.286549
Aves	Parus_major	67	0.119287	0.288341
Aves	Parus_major	68	0.118186	0.285681
Aves	Parus_major	69	0.117782	0.284703
Aves	Parus_major	70	0.1205	0.291273
Aves	Parus_major	71	0.120657	0.291653
Aves	Parus_major	72	0.116524	0.281663
Aves	Parus_major	73	0.115042	0.27808
Aves	Parus_major	74	0.113761	0.274985
Aves	Parus_major	75	0.11475	0.277374
Aves	Parus_major	76	0.119781	0.289535
Aves	Parus_major	77	0.115715	0.279709
Aves	Parus_major	78	0.113469	0.27428
Aves	Parus_major	79	0.112683	0.272379
Aves	Parus_major	80	0.112279	0.271402
Aves	Parus_major	81	0.118568	0.286604
Aves	Parus_major	82	0.118905	0.287418
Aves	Parus_major	83	0.112841	0.272759
Aves	Parus_major	84	0.112751	0.272542
Aves	Parus_major	85	0.111942	0.270588
Aves	Parus_major	86	0.106327	0.257015
Aves	Parus_major	87	0.105092	0.254029
Aves	Parus_major	88	0.0994991	0.24051
Aves	Parus_major	89	0.098713	0.23861
Aves	Parus_major	90	0.0989152	0.239099
Aves	Parus_major	91	0.0996788	0.240945
Aves	Parus_major	92	0.0963996	0.233018
Aves	Parus_major	93	0.0973429	0.235298
Aves	Parus_major	94	0.0988029	0.238827
Aves	Parus_major	95	0.0954563	0.230738
Aves	Parus_major	96	0.0940188	0.227263
Aves	Parus_major	97	0.0949397	0.229489
Aves	Parus_major	98	0.0919974	0.222377
Aves	Parus_major	99	0.0878647	0.212387
Aves	Parus_major	100	0.14588	0.352622
Aves	Stachyris_ruficeps	1	0.286874	0.680764
Aves	Stachyris_ruficeps	2	0.166154	0.39429
Aves	Stachyris_ruficeps	3	0.168385	0.399585
Aves	Stachyris_ruficeps	4	0.168193	0.399128
Aves	Stachyris_ruficeps	5	0.162576	0.3858
Aves	Stachyris_ruficeps	6	0.164846	0.391186
Aves	Stachyris_ruficeps	7	0.163115	0.387078
Aves	Stachyris_ruficeps	8	0.163499	0.387991
Aves	Stachyris_ruficeps	9	0.164884	0.391277
Aves	Stachyris_ruficeps	10	0.161383	0.38297
Aves	Stachyris_ruficeps	11	0.160729	0.381418
Aves	Stachyris_ruficeps	12	0.161614	0.383517
Aves	Stachyris_ruficeps	13	0.159191	0.377766
Aves	Stachyris_ruficeps	14	0.160152	0.380048
Aves	Stachyris_ruficeps	15	0.159998	0.379683
Aves	Stachyris_ruficeps	16	0.158344	0.375758
Aves	Stachyris_ruficeps	17	0.158844	0.376944
Aves	Stachyris_ruficeps	18	0.158614	0.376397
Aves	Stachyris_ruficeps	19	0.158729	0.37667
Aves	Stachyris_ruficeps	20	0.163769	0.38863
Aves	Stachyris_ruficeps	21	0.164192	0.389634
Aves	Stachyris_ruficeps	22	0.160537	0.380961
Aves	Stachyris_ruficeps	23	0.154151	0.365807
Aves	Stachyris_ruficeps	24	0.153305	0.363798
Aves	Stachyris_ruficeps	25	0.147188	0.349283
Aves	Stachyris_ruficeps	26	0.146611	0.347914
Aves	Stachyris_ruficeps	27	0.145726	0.345814
Aves	Stachyris_ruficeps	28	0.146572	0.347822
Aves	Stachyris_ruficeps	29	0.14161	0.336046
Aves	Stachyris_ruficeps	30	0.139455	0.330933
Aves	Stachyris_ruficeps	31	0.141225	0.335133
Aves	Stachyris_ruficeps	32	0.141725	0.336319
Aves	Stachyris_ruficeps	33	0.145033	0.344171
Aves	Stachyris_ruficeps	34	0.147726	0.350561
Aves	Stachyris_ruficeps	35	0.147573	0.350196
Aves	Stachyris_ruficeps	36	0.148227	0.351748
Aves	Stachyris_ruficeps	37	0.152997	0.363068
Aves	Stachyris_ruficeps	38	0.156959	0.372471
Aves	Stachyris_ruficeps	39	0.154959	0.367724
Aves	Stachyris_ruficeps	40	0.15569	0.369458
Aves	Stachyris_ruficeps	41	0.159575	0.378679
Aves	Stachyris_ruficeps	42	0.164769	0.391003
Aves	Stachyris_ruficeps	43	0.161845	0.384065
Aves	Stachyris_ruficeps	44	0.164038	0.389269
Aves	Stachyris_ruficeps	45	0.163769	0.38863
Aves	Stachyris_ruficeps	46	0.158998	0.37731
Aves	Stachyris_ruficeps	47	0.156805	0.372106
Aves	Stachyris_ruficeps	48	0.159614	0.37877
Aves	Stachyris_ruficeps	49	0.16273	0.386165
Aves	Stachyris_ruficeps	50	0.162037	0.384522
Aves	Stachyris_ruficeps	51	0.164076	0.38936
Aves	Stachyris_ruficeps	52	0.161306	0.382787
Aves	Stachyris_ruficeps	53	0.159729	0.379044
Aves	Stachyris_ruficeps	54	0.161537	0.383335
Aves	Stachyris_ruficeps	55	0.163807	0.388721
Aves	Stachyris_ruficeps	56	0.157229	0.37311
Aves	Stachyris_ruficeps	57	0.162268	0.385069
Aves	Stachyris_ruficeps	58	0.163192	0.38726
Aves	Stachyris_ruficeps	59	0.165115	0.391825
Aves	Stachyris_ruficeps	60	0.165731	0.393286
Aves	Stachyris_ruficeps	61	0.169001	0.401045
Aves	Stachyris_ruficeps	62	0.168962	0.400954
Aves	Stachyris_ruficeps	63	0.173425	0.411544
Aves	Stachyris_ruficeps	64	0.17454	0.414191
Aves	Stachyris_ruficeps	65	0.17881	0.424325
Aves	Stachyris_ruficeps	66	0.176118	0.417934
Aves	Stachyris_ruficeps	67	0.177272	0.420673
Aves	Stachyris_ruficeps	68	0.182773	0.433728
Aves	Stachyris_ruficeps	69	0.178541	0.423686
Aves	Stachyris_ruficeps	70	0.177464	0.42113
Aves	Stachyris_ruficeps	71	0.172271	0.408805
Aves	Stachyris_ruficeps	72	0.175694	0.41693
Aves	Stachyris_ruficeps	73	0.178695	0.424051
Aves	Stachyris_ruficeps	74	0.176118	0.417934
Aves	Stachyris_ruficeps	75	0.174425	0.413918
Aves	Stachyris_ruficeps	76	0.170809	0.405336
Aves	Stachyris_ruficeps	77	0.169231	0.401593
Aves	Stachyris_ruficeps	78	0.170924	0.40561
Aves	Stachyris_ruficeps	79	0.166308	0.394655
Aves	Stachyris_ruficeps	80	0.172347	0.408988
Aves	Stachyris_ruficeps	81	0.174156	0.413279
Aves	Stachyris_ruficeps	82	0.172501	0.409353
Aves	Stachyris_ruficeps	83	0.168808	0.400589
Aves	Stachyris_ruficeps	84	0.168116	0.398946
Aves	Stachyris_ruficeps	85	0.169001	0.401045
Aves	Stachyris_ruficeps	86	0.165692	0.393194
Aves	Stachyris_ruficeps	87	0.163538	0.388082
Aves	Stachyris_ruficeps	88	0.154959	0.367724
Aves	Stachyris_ruficeps	89	0.143456	0.340428
Aves	Stachyris_ruficeps	90	0.143379	0.340245
Aves	Stachyris_ruficeps	91	0.14361	0.340793
Aves	Stachyris_ruficeps	92	0.140763	0.334037
Aves	Stachyris_ruficeps	93	0.142879	0.339058
Aves	Stachyris_ruficeps	94	0.14638	0.347366
Aves	Stachyris_ruficeps	95	0.140455	0.333307
Aves	Stachyris_ruficeps	96	0.135608	0.321804
Aves	Stachyris_ruficeps	97	0.131146	0.311214
Aves	Stachyris_ruficeps	98	0.119143	0.282731
Aves	Stachyris_ruficeps	99	0.116373	0.276158
Aves	Stachyris_ruficeps	100	0.198507	0.471066
Aves	Cairina_moschata	1	0.144766	0.349339
Aves	Cairina_moschata	2	0.0940295	0.226905
Aves	Cairina_moschata	3	0.0932556	0.225038
Aves	Cairina_moschata	4	0.0953725	0.230146
Aves	Cairina_moschata	5	0.0958277	0.231245
Aves	Cairina_moschata	6	0.0956684	0.23086
Aves	Cairina_moschata	7	0.0946214	0.228333
Aves	Cairina_moschata	8	0.0958733	0.231354
Aves	Cairina_moschata	9	0.0981722	0.236902
Aves	Cairina_moschata	10	0.100608	0.242779
Aves	Cairina_moschata	11	0.0992193	0.239429
Aves	Cairina_moschata	12	0.100539	0.242615
Aves	Cairina_moschata	13	0.0957595	0.23108
Aves	Cairina_moschata	14	0.0991055	0.239154
Aves	Cairina_moschata	15	0.100335	0.24212
Aves	Cairina_moschata	16	0.108643	0.262169
Aves	Cairina_moschata	17	0.110532	0.266728
Aves	Cairina_moschata	18	0.110828	0.267442
Aves	Cairina_moschata	19	0.10903	0.263102
Aves	Cairina_moschata	20	0.116928	0.282162
Aves	Cairina_moschata	21	0.117884	0.284469
Aves	Cairina_moschata	22	0.114515	0.27634
Aves	Cairina_moschata	23	0.117998	0.284744
Aves	Cairina_moschata	24	0.121139	0.292324
Aves	Cairina_moschata	25	0.120911	0.291775
Aves	Cairina_moschata	26	0.118294	0.285458
Aves	Cairina_moschata	27	0.120889	0.29172
Aves	Cairina_moschata	28	0.124439	0.300288
Aves	Cairina_moschata	29	0.120388	0.290511
Aves	Cairina_moschata	30	0.121139	0.292324
Aves	Cairina_moschata	31	0.122049	0.294521
Aves	Cairina_moschata	32	0.121162	0.292379
Aves	Cairina_moschata	33	0.114538	0.276395
Aves	Cairina_moschata	34	0.113673	0.274308
Aves	Cairina_moschata	35	0.114811	0.277054
Aves	Cairina_moschata	36	0.116678	0.281558
Aves	Cairina_moschata	37	0.116609	0.281393
Aves	Cairina_moschata	38	0.121048	0.292104
Aves	Cairina_moschata	39	0.126989	0.30644
Aves	Cairina_moschata	40	0.128855	0.310944
Aves	Cairina_moschata	41	0.129311	0.312043
Aves	Cairina_moschata	42	0.125304	0.302376
Aves	Cairina_moschata	43	0.12642	0.305067
Aves	Cairina_moschata	44	0.134045	0.323468
Aves	Cairina_moschata	45	0.13796	0.332915
Aves	Cairina_moschata	46	0.138233	0.333574
Aves	Cairina_moschata	47	0.140874	0.339946
Aves	Cairina_moschata	48	0.140578	0.339232
Aves	Cairina_moschata	49	0.133043	0.321051
Aves	Cairina_moschata	50	0.128901	0.311054
Aves	Cairina_moschata	51	0.129493	0.312482
Aves	Cairina_moschata	52	0.136367	0.32907
Aves	Cairina_moschata	53	0.132725	0.320282
Aves	Cairina_moschata	54	0.131018	0.316162
Aves	Cairina_moschata	55	0.126943	0.30633
Aves	Cairina_moschata	56	0.121571	0.293367
Aves	Cairina_moschata	57	0.12057	0.290951
Aves	Cairina_moschata	58	0.122391	0.295345
Aves	Cairina_moschata	59	0.132952	0.320831
Aves	Cairina_moschata	60	0.129242	0.311878
Aves	Cairina_moschata	61	0.138825	0.335002
Aves	Cairina_moschata	62	0.141352	0.341099
Aves	Cairina_moschata	63	0.148909	0.359335
Aves	Cairina_moschata	64	0.149774	0.361423
Aves	Cairina_moschata	65	0.144106	0.347746
Aves	Cairina_moschata	66	0.146109	0.352579
Aves	Cairina_moschata	67	0.147338	0.355545
Aves	Cairina_moschata	68	0.141374	0.341154
Aves	Cairina_moschata	69	0.138506	0.334233
Aves	Cairina_moschata	70	0.141465	0.341374
Aves	Cairina_moschata	71	0.139212	0.335936
Aves	Cairina_moschata	72	0.13582	0.327752
Aves	Cairina_moschata	73	0.142763	0.344505
Aves	Cairina_moschata	74	0.144015	0.347526
Aves	Cairina_moschata	75	0.146132	0.352634
Aves	Cairina_moschata	76	0.140418	0.338847
Aves	Cairina_moschata	77	0.145563	0.351261
Aves	Cairina_moschata	78	0.1495	0.360763
Aves	Cairina_moschata	79	0.144811	0.349448
Aves	Cairina_moschata	80	0.14711	0.354996
Aves	Cairina_moschata	81	0.149865	0.361642
Aves	Cairina_moschata	82	0.149432	0.360599
Aves	Cairina_moschata	83	0.146723	0.354062
Aves	Cairina_moschata	84	0.146723	0.354062
Aves	Cairina_moschata	85	0.142786	0.34456
Aves	Cairina_moschata	86	0.137459	0.331707
Aves	Cairina_moschata	87	0.134455	0.324456
Aves	Cairina_moschata	88	0.129402	0.312263
Aves	Cairina_moschata	89	0.131974	0.318469
Aves	Cairina_moschata	90	0.135456	0.326873
Aves	Cairina_moschata	91	0.132292	0.319238
Aves	Cairina_moschata	92	0.131473	0.317261
Aves	Cairina_moschata	93	0.134523	0.324621
Aves	Cairina_moschata	94	0.137892	0.33275
Aves	Cairina_moschata	95	0.134591	0.324786
Aves	Cairina_moschata	96	0.133385	0.321875
Aves	Cairina_moschata	97	0.13623	0.328741
Aves	Cairina_moschata	98	0.134796	0.32528
Aves	Cairina_moschata	99	0.130653	0.315284
Aves	Cairina_moschata	100	0.190882	0.460622
Aves	Zonotrichia_albicollis	1	0.168116	0.404904
Aves	Zonotrichia_albicollis	2	0.102762	0.247501
Aves	Zonotrichia_albicollis	3	0.102843	0.247695
Aves	Zonotrichia_albicollis	4	0.100185	0.241294
Aves	Zonotrichia_albicollis	5	0.101111	0.243525
Aves	Zonotrichia_albicollis	6	0.0935008	0.225195
Aves	Zonotrichia_albicollis	7	0.0937424	0.225777
Aves	Zonotrichia_albicollis	8	0.0892325	0.214915
Aves	Zonotrichia_albicollis	9	0.0845212	0.203567
Aves	Zonotrichia_albicollis	10	0.0831119	0.200173
Aves	Zonotrichia_albicollis	11	0.0806153	0.19416
Aves	Zonotrichia_albicollis	12	0.0815817	0.196488
Aves	Zonotrichia_albicollis	13	0.0818636	0.197167
Aves	Zonotrichia_albicollis	14	0.0809374	0.194936
Aves	Zonotrichia_albicollis	15	0.081783	0.196973
Aves	Zonotrichia_albicollis	16	0.0814206	0.1961
Aves	Zonotrichia_albicollis	17	0.0853668	0.205604
Aves	Zonotrichia_albicollis	18	0.0827897	0.199397
Aves	Zonotrichia_albicollis	19	0.0815817	0.196488
Aves	Zonotrichia_albicollis	20	0.0853266	0.205507
Aves	Zonotrichia_albicollis	21	0.0839172	0.202113
Aves	Zonotrichia_albicollis	22	0.0831924	0.200367
Aves	Zonotrichia_albicollis	23	0.0855279	0.205992
Aves	Zonotrichia_albicollis	24	0.0852058	0.205216
Aves	Zonotrichia_albicollis	25	0.0858098	0.206671
Aves	Zonotrichia_albicollis	26	0.0880647	0.212102
Aves	Zonotrichia_albicollis	27	0.0887896	0.213848
Aves	Zonotrichia_albicollis	28	0.0830716	0.200076
Aves	Zonotrichia_albicollis	29	0.0818636	0.197167
Aves	Zonotrichia_albicollis	30	0.0798502	0.192317
Aves	Zonotrichia_albicollis	31	0.0815414	0.196391
Aves	Zonotrichia_albicollis	32	0.0829911	0.199882
Aves	Zonotrichia_albicollis	33	0.0829105	0.199688
Aves	Zonotrichia_albicollis	34	0.0836756	0.201531
Aves	Zonotrichia_albicollis	35	0.0797697	0.192123
Aves	Zonotrichia_albicollis	36	0.0819038	0.197264
Aves	Zonotrichia_albicollis	37	0.081622	0.196585
Aves	Zonotrichia_albicollis	38	0.089313	0.215108
Aves	Zonotrichia_albicollis	39	0.0856487	0.206283
Aves	Zonotrichia_albicollis	40	0.0864943	0.20832
Aves	Zonotrichia_albicollis	41	0.0806958	0.194354
Aves	Zonotrichia_albicollis	42	0.078159	0.188244
Aves	Zonotrichia_albicollis	43	0.0799307	0.192511
Aves	Zonotrichia_albicollis	44	0.0784006	0.188826
Aves	Zonotrichia_albicollis	45	0.0770315	0.185529
Aves	Zonotrichia_albicollis	46	0.0765885	0.184462
Aves	Zonotrichia_albicollis	47	0.0687767	0.165647
Aves	Zonotrichia_albicollis	48	0.0732866	0.176509
Aves	Zonotrichia_albicollis	49	0.0731658	0.176218
Aves	Zonotrichia_albicollis	50	0.0736893	0.177479
Aves	Zonotrichia_albicollis	51	0.0743738	0.179128
Aves	Zonotrichia_albicollis	52	0.0738101	0.17777
Aves	Zonotrichia_albicollis	53	0.0775952	0.186886
Aves	Zonotrichia_albicollis	54	0.0791657	0.190669
Aves	Zonotrichia_albicollis	55	0.0821857	0.197942
Aves	Zonotrichia_albicollis	56	0.0788838	0.18999
Aves	Zonotrichia_albicollis	57	0.0792865	0.19096
Aves	Zonotrichia_albicollis	58	0.0789241	0.190087
Aves	Zonotrichia_albicollis	59	0.076951	0.185335
Aves	Zonotrichia_albicollis	60	0.0761053	0.183298
Aves	Zonotrichia_albicollis	61	0.0791657	0.190669
Aves	Zonotrichia_albicollis	62	0.0815012	0.196294
Aves	Zonotrichia_albicollis	63	0.0815414	0.196391
Aves	Zonotrichia_albicollis	64	0.08283	0.199494
Aves	Zonotrichia_albicollis	65	0.0870581	0.209677
Aves	Zonotrichia_albicollis	66	0.0862125	0.207641
Aves	Zonotrichia_albicollis	67	0.0867762	0.208999
Aves	Zonotrichia_albicollis	68	0.0912056	0.219667
Aves	Zonotrichia_albicollis	69	0.0892728	0.215011
Aves	Zonotrichia_albicollis	70	0.0910445	0.219279
Aves	Zonotrichia_albicollis	71	0.0894338	0.215399
Aves	Zonotrichia_albicollis	72	0.0905211	0.218018
Aves	Zonotrichia_albicollis	73	0.0931384	0.224322
Aves	Zonotrichia_albicollis	74	0.094427	0.227425
Aves	Zonotrichia_albicollis	75	0.093219	0.224516
Aves	Zonotrichia_albicollis	76	0.0910043	0.219182
Aves	Zonotrichia_albicollis	77	0.0853266	0.205507
Aves	Zonotrichia_albicollis	78	0.0863735	0.208029
Aves	Zonotrichia_albicollis	79	0.0853668	0.205604
Aves	Zonotrichia_albicollis	80	0.0842393	0.202889
Aves	Zonotrichia_albicollis	81	0.0850044	0.204731
Aves	Zonotrichia_albicollis	82	0.0841588	0.202695
Aves	Zonotrichia_albicollis	83	0.0855682	0.206089
Aves	Zonotrichia_albicollis	84	0.0908029	0.218697
Aves	Zonotrichia_albicollis	85	0.0872191	0.210065
Aves	Zonotrichia_albicollis	86	0.0827495	0.1993
Aves	Zonotrichia_albicollis	87	0.079367	0.191154
Aves	Zonotrichia_albicollis	88	0.0796086	0.191736
Aves	Zonotrichia_albicollis	89	0.0742933	0.178934
Aves	Zonotrichia_albicollis	90	0.0754208	0.181649
Aves	Zonotrichia_albicollis	91	0.0750181	0.180679
Aves	Zonotrichia_albicollis	92	0.0749376	0.180486
Aves	Zonotrichia_albicollis	93	0.0761456	0.183395
Aves	Zonotrichia_albicollis	94	0.0739712	0.178158
Aves	Zonotrichia_albicollis	95	0.0714746	0.172145
Aves	Zonotrichia_albicollis	96	0.069421	0.167199
Aves	Zonotrichia_albicollis	97	0.0701055	0.168848
Aves	Zonotrichia_albicollis	98	0.0610453	0.147026
Aves	Zonotrichia_albicollis	99	0.058428	0.140722
Aves	Zonotrichia_albicollis	100	0.0917693	0.221024
Aves	Catharus_ustulatus	1	0.225279	0.530318
Aves	Catharus_ustulatus	2	0.136822	0.322086
Aves	Catharus_ustulatus	3	0.136688	0.32177
Aves	Catharus_ustulatus	4	0.138706	0.32652
Aves	Catharus_ustulatus	5	0.121889	0.286932
Aves	Catharus_ustulatus	6	0.121418	0.285824
Aves	Catharus_ustulatus	7	0.125858	0.296275
Aves	Catharus_ustulatus	8	0.124916	0.294058
Aves	Catharus_ustulatus	9	0.123772	0.291366
Aves	Catharus_ustulatus	10	0.12653	0.297859
Aves	Catharus_ustulatus	11	0.127741	0.300709
Aves	Catharus_ustulatus	12	0.124781	0.293741
Aves	Catharus_ustulatus	13	0.126598	0.298017
Aves	Catharus_ustulatus	14	0.135006	0.317811
Aves	Catharus_ustulatus	15	0.139177	0.327629
Aves	Catharus_ustulatus	16	0.139917	0.32937
Aves	Catharus_ustulatus	17	0.145433	0.342355
Aves	Catharus_ustulatus	18	0.138235	0.325412
Aves	Catharus_ustulatus	19	0.135746	0.319553
Aves	Catharus_ustulatus	20	0.129423	0.304668
Aves	Catharus_ustulatus	21	0.127674	0.300551
Aves	Catharus_ustulatus	22	0.126127	0.296909
Aves	Catharus_ustulatus	23	0.121754	0.286616
Aves	Catharus_ustulatus	24	0.123503	0.290733
Aves	Catharus_ustulatus	25	0.118458	0.278856
Aves	Catharus_ustulatus	26	0.121351	0.285666
Aves	Catharus_ustulatus	27	0.121553	0.286141
Aves	Catharus_ustulatus	28	0.126598	0.298017
Aves	Catharus_ustulatus	29	0.125454	0.295325
Aves	Catharus_ustulatus	30	0.118996	0.280123
Aves	Catharus_ustulatus	31	0.122158	0.287566
Aves	Catharus_ustulatus	32	0.131508	0.309577
Aves	Catharus_ustulatus	33	0.128077	0.301501
Aves	Catharus_ustulatus	34	0.123907	0.291683
Aves	Catharus_ustulatus	35	0.113817	0.26793
Aves	Catharus_ustulatus	36	0.116709	0.274739
Aves	Catharus_ustulatus	37	0.116171	0.273473
Aves	Catharus_ustulatus	38	0.119064	0.280282
Aves	Catharus_ustulatus	39	0.119938	0.28234
Aves	Catharus_ustulatus	40	0.125992	0.296592
Aves	Catharus_ustulatus	41	0.125118	0.294533
Aves	Catharus_ustulatus	42	0.123705	0.291208
Aves	Catharus_ustulatus	43	0.123907	0.291683
Aves	Catharus_ustulatus	44	0.131037	0.308468
Aves	Catharus_ustulatus	45	0.134939	0.317653
Aves	Catharus_ustulatus	46	0.132114	0.311002
Aves	Catharus_ustulatus	47	0.132383	0.311635
Aves	Catharus_ustulatus	48	0.133324	0.313852
Aves	Catharus_ustulatus	49	0.134266	0.316069
Aves	Catharus_ustulatus	50	0.136553	0.321453
Aves	Catharus_ustulatus	51	0.122965	0.289466
Aves	Catharus_ustulatus	52	0.127539	0.300234
Aves	Catharus_ustulatus	53	0.131844	0.310368
Aves	Catharus_ustulatus	54	0.129288	0.304351
Aves	Catharus_ustulatus	55	0.13393	0.315277
Aves	Catharus_ustulatus	56	0.129557	0.304984
Aves	Catharus_ustulatus	57	0.136419	0.321136
Aves	Catharus_ustulatus	58	0.136957	0.322403
Aves	Catharus_ustulatus	59	0.144827	0.34093
Aves	Catharus_ustulatus	60	0.14624	0.344256
Aves	Catharus_ustulatus	61	0.147787	0.347898
Aves	Catharus_ustulatus	62	0.146374	0.344572
Aves	Catharus_ustulatus	63	0.14772	0.347739
Aves	Catharus_ustulatus	64	0.145298	0.342039
Aves	Catharus_ustulatus	65	0.136284	0.32082
Aves	Catharus_ustulatus	66	0.132988	0.31306
Aves	Catharus_ustulatus	67	0.131037	0.308468
Aves	Catharus_ustulatus	68	0.142809	0.33618
Aves	Catharus_ustulatus	69	0.138369	0.325728
Aves	Catharus_ustulatus	70	0.134468	0.316544
Aves	Catharus_ustulatus	71	0.14032	0.330321
Aves	Catharus_ustulatus	72	0.138908	0.326995
Aves	Catharus_ustulatus	73	0.135073	0.317969
Aves	Catharus_ustulatus	74	0.13393	0.315277
Aves	Catharus_ustulatus	75	0.130566	0.30736
Aves	Catharus_ustulatus	76	0.12579	0.296117
Aves	Catharus_ustulatus	77	0.129625	0.305143
Aves	Catharus_ustulatus	78	0.125252	0.29485
Aves	Catharus_ustulatus	79	0.132046	0.310843
Aves	Catharus_ustulatus	80	0.132786	0.312585
Aves	Catharus_ustulatus	81	0.144087	0.339188
Aves	Catharus_ustulatus	82	0.14476	0.340772
Aves	Catharus_ustulatus	83	0.141464	0.333013
Aves	Catharus_ustulatus	84	0.141396	0.332854
Aves	Catharus_ustulatus	85	0.135342	0.318603
Aves	Catharus_ustulatus	86	0.124109	0.292158
Aves	Catharus_ustulatus	87	0.122023	0.287249
Aves	Catharus_ustulatus	88	0.11718	0.275848
Aves	Catharus_ustulatus	89	0.118929	0.279965
Aves	Catharus_ustulatus	90	0.109377	0.257479
Aves	Catharus_ustulatus	91	0.10487	0.24687
Aves	Catharus_ustulatus	92	0.103928	0.244653
Aves	Catharus_ustulatus	93	0.0993542	0.233885
Aves	Catharus_ustulatus	94	0.0953182	0.224384
Aves	Catharus_ustulatus	95	0.0926275	0.21805
Aves	Catharus_ustulatus	96	0.091753	0.215991
Aves	Catharus_ustulatus	97	0.0894659	0.210607
Aves	Catharus_ustulatus	98	0.0876497	0.206332
Aves	Catharus_ustulatus	99	0.0813265	0.191447
Aves	Catharus_ustulatus	100	0.150074	0.353282
Aves	Athene_cunicularia	1	0.0865771	0.211576
Aves	Athene_cunicularia	2	0.0522729	0.127744
Aves	Athene_cunicularia	3	0.0499393	0.122041
Aves	Athene_cunicularia	4	0.0472323	0.115426
Aves	Athene_cunicularia	5	0.0532997	0.130253
Aves	Athene_cunicularia	6	0.0521329	0.127402
Aves	Athene_cunicularia	7	0.0524596	0.1282
Aves	Athene_cunicularia	8	0.0512461	0.125235
Aves	Athene_cunicularia	9	0.0493326	0.120559
Aves	Athene_cunicularia	10	0.052413	0.128086
Aves	Athene_cunicularia	11	0.0513395	0.125463
Aves	Athene_cunicularia	12	0.0515262	0.125919
Aves	Athene_cunicularia	13	0.046859	0.114514
Aves	Athene_cunicularia	14	0.0462522	0.113031
Aves	Athene_cunicularia	15	0.0425184	0.103906
Aves	Athene_cunicularia	16	0.0374778	0.0915881
Aves	Athene_cunicularia	17	0.0401848	0.0982034
Aves	Athene_cunicularia	18	0.0381312	0.0931849
Aves	Athene_cunicularia	19	0.0400448	0.0978612
Aves	Athene_cunicularia	20	0.0340708	0.0832619
Aves	Athene_cunicularia	21	0.0376645	0.0920443
Aves	Athene_cunicularia	22	0.0368244	0.0899912
Aves	Athene_cunicularia	23	0.038598	0.0943254
Aves	Athene_cunicularia	24	0.0390647	0.095466
Aves	Athene_cunicularia	25	0.0393914	0.0962644
Aves	Athene_cunicularia	26	0.0394381	0.0963785
Aves	Athene_cunicularia	27	0.0412116	0.100713
Aves	Athene_cunicularia	28	0.038598	0.0943254
Aves	Athene_cunicularia	29	0.0419584	0.102538
Aves	Athene_cunicularia	30	0.0403248	0.0985455
Aves	Athene_cunicularia	31	0.041585	0.101625
Aves	Athene_cunicularia	32	0.041585	0.101625
Aves	Athene_cunicularia	33	0.0399981	0.0977471
Aves	Athene_cunicularia	34	0.0391114	0.0955801
Aves	Athene_cunicularia	35	0.0399048	0.097519
Aves	Athene_cunicularia	36	0.0396248	0.0968347
Aves	Athene_cunicularia	37	0.0373378	0.0912459
Aves	Athene_cunicularia	38	0.0342108	0.083604
Aves	Athene_cunicularia	39	0.0359843	0.0879382
Aves	Athene_cunicularia	40	0.0326706	0.0798401
Aves	Athene_cunicularia	41	0.0319705	0.0781293
Aves	Athene_cunicularia	42	0.039298	0.0960363
Aves	Athene_cunicularia	43	0.0384113	0.0938692
Aves	Athene_cunicularia	44	0.042005	0.102652
Aves	Athene_cunicularia	45	0.0411649	0.100599
Aves	Athene_cunicularia	46	0.0410249	0.100256
Aves	Athene_cunicularia	47	0.0414916	0.101397
Aves	Athene_cunicularia	48	0.0413983	0.101169
Aves	Athene_cunicularia	49	0.0403248	0.0985455
Aves	Athene_cunicularia	50	0.044852	0.109609
Aves	Athene_cunicularia	51	0.0441986	0.108012
Aves	Athene_cunicularia	52	0.0464389	0.113487
Aves	Athene_cunicularia	53	0.044712	0.109267
Aves	Athene_cunicularia	54	0.0469523	0.114742
Aves	Athene_cunicularia	55	0.050126	0.122498
Aves	Athene_cunicularia	56	0.0487725	0.11919
Aves	Athene_cunicularia	57	0.0466256	0.113943
Aves	Athene_cunicularia	58	0.0480258	0.117365
Aves	Athene_cunicularia	59	0.0484458	0.118392
Aves	Athene_cunicularia	60	0.0431252	0.105389
Aves	Athene_cunicularia	61	0.038738	0.0946676
Aves	Athene_cunicularia	62	0.041585	0.101625
Aves	Athene_cunicularia	63	0.0437786	0.106986
Aves	Athene_cunicularia	64	0.0396248	0.0968347
Aves	Athene_cunicularia	65	0.039298	0.0960363
Aves	Athene_cunicularia	66	0.0398114	0.0972909
Aves	Athene_cunicularia	67	0.0378979	0.0926146
Aves	Athene_cunicularia	68	0.0368711	0.0901053
Aves	Athene_cunicularia	69	0.0378979	0.0926146
Aves	Athene_cunicularia	70	0.038878	0.0950098
Aves	Athene_cunicularia	71	0.0376178	0.0919302
Aves	Athene_cunicularia	72	0.0406515	0.099344
Aves	Athene_cunicularia	73	0.0409316	0.100028
Aves	Athene_cunicularia	74	0.0363577	0.0888507
Aves	Athene_cunicularia	75	0.0355643	0.0869117
Aves	Athene_cunicularia	76	0.0352842	0.0862274
Aves	Athene_cunicularia	77	0.033744	0.0824635
Aves	Athene_cunicularia	78	0.0317838	0.0776731
Aves	Athene_cunicularia	79	0.0327173	0.0799542
Aves	Athene_cunicularia	80	0.0365911	0.089421
Aves	Athene_cunicularia	81	0.0385046	0.0940973
Aves	Athene_cunicularia	82	0.0357976	0.087482
Aves	Athene_cunicularia	83	0.0342108	0.083604
Aves	Athene_cunicularia	84	0.0317838	0.0776731
Aves	Athene_cunicularia	85	0.033604	0.0821213
Aves	Athene_cunicularia	86	0.0334173	0.0816651
Aves	Athene_cunicularia	87	0.0326706	0.0798401
Aves	Athene_cunicularia	88	0.0322039	0.0786996
Aves	Athene_cunicularia	89	0.0323439	0.0790417
Aves	Athene_cunicularia	90	0.0299169	0.0731108
Aves	Athene_cunicularia	91	0.0294502	0.0719702
Aves	Athene_cunicularia	92	0.0274433	0.0670657
Aves	Athene_cunicularia	93	0.0298703	0.0729967
Aves	Athene_cunicularia	94	0.0282367	0.0690047
Aves	Athene_cunicularia	95	0.0274433	0.0670657
Aves	Athene_cunicularia	96	0.0257631	0.0629597
Aves	Athene_cunicularia	97	0.024643	0.0602223
Aves	Athene_cunicularia	98	0.024783	0.0605645
Aves	Athene_cunicularia	99	0.0244563	0.0597661
Aves	Athene_cunicularia	100	0.0399048	0.097519
Aves	Anas_platyrhynchos	1	0.0930215	0.224581
Aves	Anas_platyrhynchos	2	0.058073	0.140205
Aves	Anas_platyrhynchos	3	0.0614032	0.148245
Aves	Anas_platyrhynchos	4	0.0626754	0.151317
Aves	Anas_platyrhynchos	5	0.067652	0.163332
Aves	Anas_platyrhynchos	6	0.068363	0.165048
Aves	Anas_platyrhynchos	7	0.0685875	0.16559
Aves	Anas_platyrhynchos	8	0.069261	0.167216
Aves	Anas_platyrhynchos	9	0.0678391	0.163783
Aves	Anas_platyrhynchos	10	0.0703087	0.169746
Aves	Anas_platyrhynchos	11	0.0713938	0.172366
Aves	Anas_platyrhynchos	12	0.0706829	0.170649
Aves	Anas_platyrhynchos	13	0.0712442	0.172004
Aves	Anas_platyrhynchos	14	0.0722544	0.174443
Aves	Anas_platyrhynchos	15	0.0725912	0.175256
Aves	Anas_platyrhynchos	16	0.0697474	0.168391
Aves	Anas_platyrhynchos	17	0.0701216	0.169294
Aves	Anas_platyrhynchos	18	0.0694481	0.167668
Aves	Anas_platyrhynchos	19	0.0669785	0.161706
Aves	Anas_platyrhynchos	20	0.0689616	0.166494
Aves	Anas_platyrhynchos	21	0.0682881	0.164868
Aves	Anas_platyrhynchos	22	0.0679139	0.163964
Aves	Anas_platyrhynchos	23	0.0694855	0.167758
Aves	Anas_platyrhynchos	24	0.0680262	0.164235
Aves	Anas_platyrhynchos	25	0.0697848	0.168481
Aves	Anas_platyrhynchos	26	0.06855	0.1655
Aves	Anas_platyrhynchos	27	0.0628625	0.151768
Aves	Anas_platyrhynchos	28	0.0624883	0.150865
Aves	Anas_platyrhynchos	29	0.0648082	0.156466
Aves	Anas_platyrhynchos	30	0.0691113	0.166855
Aves	Anas_platyrhynchos	31	0.0728157	0.175798
Aves	Anas_platyrhynchos	32	0.0700842	0.169204
Aves	Anas_platyrhynchos	33	0.0703087	0.169746
Aves	Anas_platyrhynchos	34	0.0693732	0.167487
Aves	Anas_platyrhynchos	35	0.0707951	0.17092
Aves	Anas_platyrhynchos	36	0.0756221	0.182574
Aves	Anas_platyrhynchos	37	0.0762208	0.184019
Aves	Anas_platyrhynchos	38	0.0768569	0.185555
Aves	Anas_platyrhynchos	39	0.0769691	0.185826
Aves	Anas_platyrhynchos	40	0.0782413	0.188898
Aves	Anas_platyrhynchos	41	0.0758466	0.183116
Aves	Anas_platyrhynchos	42	0.0737512	0.178057
Aves	Anas_platyrhynchos	43	0.0723293	0.174624
Aves	Anas_platyrhynchos	44	0.0710571	0.171553
Aves	Anas_platyrhynchos	45	0.0761459	0.183839
Aves	Anas_platyrhynchos	46	0.0778297	0.187904
Aves	Anas_platyrhynchos	47	0.0739008	0.178418
Aves	Anas_platyrhynchos	48	0.0748737	0.180767
Aves	Anas_platyrhynchos	49	0.0779794	0.188265
Aves	Anas_platyrhynchos	50	0.0730402	0.17634
Aves	Anas_platyrhynchos	51	0.072217	0.174353
Aves	Anas_platyrhynchos	52	0.0757717	0.182935
Aves	Anas_platyrhynchos	53	0.0759963	0.183477
Aves	Anas_platyrhynchos	54	0.0792891	0.191427
Aves	Anas_platyrhynchos	55	0.0792516	0.191337
Aves	Anas_platyrhynchos	56	0.0780917	0.188536
Aves	Anas_platyrhynchos	57	0.0764453	0.184561
Aves	Anas_platyrhynchos	58	0.0760337	0.183568
Aves	Anas_platyrhynchos	59	0.0771936	0.186368
Aves	Anas_platyrhynchos	60	0.0758466	0.183116
Aves	Anas_platyrhynchos	61	0.0774556	0.187
Aves	Anas_platyrhynchos	62	0.0807858	0.195041
Aves	Anas_platyrhynchos	63	0.0810477	0.195673
Aves	Anas_platyrhynchos	64	0.0858372	0.207236
Aves	Anas_platyrhynchos	65	0.0843779	0.203713
Aves	Anas_platyrhynchos	66	0.0867727	0.209495
Aves	Anas_platyrhynchos	67	0.0859495	0.207507
Aves	Anas_platyrhynchos	68	0.0862114	0.20814
Aves	Anas_platyrhynchos	69	0.0816838	0.197209
Aves	Anas_platyrhynchos	70	0.0820954	0.198202
Aves	Anas_platyrhynchos	71	0.0805613	0.194498
Aves	Anas_platyrhynchos	72	0.083218	0.200913
Aves	Anas_platyrhynchos	73	0.0818709	0.19766
Aves	Anas_platyrhynchos	74	0.0826193	0.199467
Aves	Anas_platyrhynchos	75	0.0825444	0.199286
Aves	Anas_platyrhynchos	76	0.0846773	0.204436
Aves	Anas_platyrhynchos	77	0.0881946	0.212928
Aves	Anas_platyrhynchos	78	0.0889055	0.214644
Aves	Anas_platyrhynchos	79	0.0930964	0.224762
Aves	Anas_platyrhynchos	80	0.097362	0.23506
Aves	Anas_platyrhynchos	81	0.0990084	0.239035
Aves	Anas_platyrhynchos	82	0.0929093	0.22431
Aves	Anas_platyrhynchos	83	0.0921983	0.222594
Aves	Anas_platyrhynchos	84	0.0876707	0.211663
Aves	Anas_platyrhynchos	85	0.0909261	0.219522
Aves	Anas_platyrhynchos	86	0.0900281	0.217354
Aves	Anas_platyrhynchos	87	0.0949298	0.229188
Aves	Anas_platyrhynchos	88	0.0946305	0.228466
Aves	Anas_platyrhynchos	89	0.0865856	0.209043
Aves	Anas_platyrhynchos	90	0.0880449	0.212566
Aves	Anas_platyrhynchos	91	0.0826567	0.199557
Aves	Anas_platyrhynchos	92	0.0759214	0.183297
Aves	Anas_platyrhynchos	93	0.0811225	0.195854
Aves	Anas_platyrhynchos	94	0.0766324	0.185013
Aves	Anas_platyrhynchos	95	0.06971	0.1683
Aves	Anas_platyrhynchos	96	0.0652198	0.15746
Aves	Anas_platyrhynchos	97	0.0642095	0.155021
Aves	Anas_platyrhynchos	98	0.0606922	0.146529
Aves	Anas_platyrhynchos	99	0.0603181	0.145625
Aves	Anas_platyrhynchos	100	0.106604	0.257374
Aves	Serinus_canaria	1	0.147413	0.347181
Aves	Serinus_canaria	2	0.0933044	0.219747
Aves	Serinus_canaria	3	0.0951685	0.224137
Aves	Serinus_canaria	4	0.091793	0.216187
Aves	Serinus_canaria	5	0.0923472	0.217492
Aves	Serinus_canaria	6	0.09139	0.215238
Aves	Serinus_canaria	7	0.0907854	0.213814
Aves	Serinus_canaria	8	0.0916419	0.215831
Aves	Serinus_canaria	9	0.0959746	0.226035
Aves	Serinus_canaria	10	0.0922465	0.217255
Aves	Serinus_canaria	11	0.0931533	0.219391
Aves	Serinus_canaria	12	0.0926999	0.218323
Aves	Serinus_canaria	13	0.0929518	0.218916
Aves	Serinus_canaria	14	0.0926495	0.218204
Aves	Serinus_canaria	15	0.0897778	0.211441
Aves	Serinus_canaria	16	0.0885183	0.208475
Aves	Serinus_canaria	17	0.0883168	0.208
Aves	Serinus_canaria	18	0.087813	0.206813
Aves	Serinus_canaria	19	0.0883168	0.208
Aves	Serinus_canaria	20	0.0869565	0.204796
Aves	Serinus_canaria	21	0.0843367	0.198626
Aves	Serinus_canaria	22	0.0818681	0.192812
Aves	Serinus_canaria	23	0.0812635	0.191388
Aves	Serinus_canaria	24	0.0796514	0.187592
Aves	Serinus_canaria	25	0.080659	0.189965
Aves	Serinus_canaria	26	0.0815658	0.1921
Aves	Serinus_canaria	27	0.0809613	0.190677
Aves	Serinus_canaria	28	0.0808101	0.190321
Aves	Serinus_canaria	29	0.0803063	0.189134
Aves	Serinus_canaria	30	0.0823215	0.19388
Aves	Serinus_canaria	31	0.082523	0.194355
Aves	Serinus_canaria	32	0.0792987	0.186761
Aves	Serinus_canaria	33	0.0789964	0.186049
Aves	Serinus_canaria	34	0.0783415	0.184507
Aves	Serinus_canaria	35	0.0800544	0.188541
Aves	Serinus_canaria	36	0.0788957	0.185812
Aves	Serinus_canaria	37	0.078946	0.18593
Aves	Serinus_canaria	38	0.0793995	0.186998
Aves	Serinus_canaria	39	0.0800544	0.188541
Aves	Serinus_canaria	40	0.0803567	0.189253
Aves	Serinus_canaria	41	0.0775354	0.182608
Aves	Serinus_canaria	42	0.0792987	0.186761
Aves	Serinus_canaria	43	0.081717	0.192456
Aves	Serinus_canaria	44	0.0817673	0.192575
Aves	Serinus_canaria	45	0.0828253	0.195067
Aves	Serinus_canaria	46	0.0834299	0.196491
Aves	Serinus_canaria	47	0.0779888	0.183676
Aves	Serinus_canaria	48	0.078543	0.184981
Aves	Serinus_canaria	49	0.07814	0.184032
Aves	Serinus_canaria	50	0.0794498	0.187117
Aves	Serinus_canaria	51	0.0815154	0.191982
Aves	Serinus_canaria	52	0.0798025	0.187948
Aves	Serinus_canaria	53	0.0781903	0.184151
Aves	Serinus_canaria	54	0.0771827	0.181778
Aves	Serinus_canaria	55	0.0771323	0.181659
Aves	Serinus_canaria	56	0.0784926	0.184863
Aves	Serinus_canaria	57	0.0759736	0.17893
Aves	Serinus_canaria	58	0.0802056	0.188897
Aves	Serinus_canaria	59	0.0790972	0.186286
Aves	Serinus_canaria	60	0.0795506	0.187354
Aves	Serinus_canaria	61	0.0775858	0.182727
Aves	Serinus_canaria	62	0.0752179	0.17715
Aves	Serinus_canaria	63	0.0762759	0.179642
Aves	Serinus_canaria	64	0.0746133	0.175726
Aves	Serinus_canaria	65	0.0736057	0.173353
Aves	Serinus_canaria	66	0.0745126	0.175489
Aves	Serinus_canaria	67	0.0737569	0.173709
Aves	Serinus_canaria	68	0.0724974	0.170743
Aves	Serinus_canaria	69	0.0690715	0.162674
Aves	Serinus_canaria	70	0.0719936	0.169556
Aves	Serinus_canaria	71	0.0716913	0.168844
Aves	Serinus_canaria	72	0.071389	0.168132
Aves	Serinus_canaria	73	0.0712882	0.167895
Aves	Serinus_canaria	74	0.0731523	0.172285
Aves	Serinus_canaria	75	0.0731523	0.172285
Aves	Serinus_canaria	76	0.0732531	0.172523
Aves	Serinus_canaria	77	0.0681143	0.16042
Aves	Serinus_canaria	78	0.0709859	0.167183
Aves	Serinus_canaria	79	0.0683158	0.160894
Aves	Serinus_canaria	80	0.0680639	0.160301
Aves	Serinus_canaria	81	0.0700791	0.165047
Aves	Serinus_canaria	82	0.0674089	0.158759
Aves	Serinus_canaria	83	0.0667036	0.157098
Aves	Serinus_canaria	84	0.0665525	0.156742
Aves	Serinus_canaria	85	0.0679127	0.159945
Aves	Serinus_canaria	86	0.0718928	0.169319
Aves	Serinus_canaria	87	0.0700287	0.164929
Aves	Serinus_canaria	88	0.0705325	0.166115
Aves	Serinus_canaria	89	0.0705829	0.166234
Aves	Serinus_canaria	90	0.07285	0.171573
Aves	Serinus_canaria	91	0.0705325	0.166115
Aves	Serinus_canaria	92	0.0696761	0.164098
Aves	Serinus_canaria	93	0.0678624	0.159827
Aves	Serinus_canaria	94	0.0676105	0.159233
Aves	Serinus_canaria	95	0.0695753	0.163861
Aves	Serinus_canaria	96	0.068215	0.160657
Aves	Serinus_canaria	97	0.0646884	0.152351
Aves	Serinus_canaria	98	0.0631266	0.148673
Aves	Serinus_canaria	99	0.061061	0.143808
Aves	Serinus_canaria	100	0.0976875	0.23007
Aves	Pavo_cristatus	1	0.140319	0.331489
Aves	Pavo_cristatus	2	0.0753528	0.178013
Aves	Pavo_cristatus	3	0.0731323	0.172767
Aves	Pavo_cristatus	4	0.0752095	0.177674
Aves	Pavo_cristatus	5	0.0745649	0.176151
Aves	Pavo_cristatus	6	0.08359	0.197472
Aves	Pavo_cristatus	7	0.0844495	0.199503
Aves	Pavo_cristatus	8	0.0857388	0.202549
Aves	Pavo_cristatus	9	0.0888905	0.209994
Aves	Pavo_cristatus	10	0.0894635	0.211348
Aves	Pavo_cristatus	11	0.0881742	0.208302
Aves	Pavo_cristatus	12	0.0951221	0.224716
Aves	Pavo_cristatus	13	0.094191	0.222516
Aves	Pavo_cristatus	14	0.0898933	0.212363
Aves	Pavo_cristatus	15	0.0907528	0.214394
Aves	Pavo_cristatus	16	0.0869565	0.205425
Aves	Pavo_cristatus	17	0.0867416	0.204918
Aves	Pavo_cristatus	18	0.0848077	0.200349
Aves	Pavo_cristatus	19	0.0865268	0.20441
Aves	Pavo_cristatus	20	0.0913258	0.215747
Aves	Pavo_cristatus	21	0.0938328	0.22167
Aves	Pavo_cristatus	22	0.0966979	0.228438
Aves	Pavo_cristatus	23	0.0893919	0.211179
Aves	Pavo_cristatus	24	0.0837333	0.197811
Aves	Pavo_cristatus	25	0.0828737	0.19578
Aves	Pavo_cristatus	26	0.078003	0.184274
Aves	Pavo_cristatus	27	0.0753528	0.178013
Aves	Pavo_cristatus	28	0.0752811	0.177843
Aves	Pavo_cristatus	29	0.0689062	0.162783
Aves	Pavo_cristatus	30	0.0752095	0.177674
Aves	Pavo_cristatus	31	0.0836616	0.197641
Aves	Pavo_cristatus	32	0.0845212	0.199672
Aves	Pavo_cristatus	33	0.0862402	0.203733
Aves	Pavo_cristatus	34	0.0911826	0.215409
Aves	Pavo_cristatus	35	0.086097	0.203395
Aves	Pavo_cristatus	36	0.0800086	0.189012
Aves	Pavo_cristatus	37	0.0806532	0.190534
Aves	Pavo_cristatus	38	0.0850942	0.201026
Aves	Pavo_cristatus	39	0.0850942	0.201026
Aves	Pavo_cristatus	40	0.0811546	0.191719
Aves	Pavo_cristatus	41	0.0789342	0.186473
Aves	Pavo_cristatus	42	0.0771435	0.182243
Aves	Pavo_cristatus	43	0.0798653	0.188673
Aves	Pavo_cristatus	44	0.0773584	0.182751
Aves	Pavo_cristatus	45	0.0739202	0.174628
Aves	Pavo_cristatus	46	0.0747081	0.17649
Aves	Pavo_cristatus	47	0.0749946	0.177167
Aves	Pavo_cristatus	48	0.0755677	0.17852
Aves	Pavo_cristatus	49	0.0776449	0.183428
Aves	Pavo_cristatus	50	0.0782179	0.184781
Aves	Pavo_cristatus	51	0.0836616	0.197641
Aves	Pavo_cristatus	52	0.0853807	0.201703
Aves	Pavo_cristatus	53	0.0892486	0.21084
Aves	Pavo_cristatus	54	0.0856672	0.202379
Aves	Pavo_cristatus	55	0.0869565	0.205425
Aves	Pavo_cristatus	56	0.0937612	0.221501
Aves	Pavo_cristatus	57	0.0941193	0.222347
Aves	Pavo_cristatus	58	0.0944058	0.223023
Aves	Pavo_cristatus	59	0.0985603	0.232838
Aves	Pavo_cristatus	60	0.11088	0.261943
Aves	Pavo_cristatus	61	0.104291	0.246375
Aves	Pavo_cristatus	62	0.100208	0.23673
Aves	Pavo_cristatus	63	0.0987752	0.233346
Aves	Pavo_cristatus	64	0.0924003	0.218286
Aves	Pavo_cristatus	65	0.0901082	0.212871
Aves	Pavo_cristatus	66	0.095337	0.225223
Aves	Pavo_cristatus	67	0.0959817	0.226746
Aves	Pavo_cristatus	68	0.10164	0.240114
Aves	Pavo_cristatus	69	0.109233	0.258051
Aves	Pavo_cristatus	70	0.107299	0.253482
Aves	Pavo_cristatus	71	0.107299	0.253482
Aves	Pavo_cristatus	72	0.108015	0.255174
Aves	Pavo_cristatus	73	0.105866	0.250098
Aves	Pavo_cristatus	74	0.0979873	0.231484
Aves	Pavo_cristatus	75	0.0983454	0.23233
Aves	Pavo_cristatus	76	0.0977724	0.230977
Aves	Pavo_cristatus	77	0.102643	0.242483
Aves	Pavo_cristatus	78	0.10164	0.240114
Aves	Pavo_cristatus	79	0.103932	0.245529
Aves	Pavo_cristatus	80	0.103861	0.24536
Aves	Pavo_cristatus	81	0.0990617	0.234022
Aves	Pavo_cristatus	82	0.100996	0.238591
Aves	Pavo_cristatus	83	0.0936896	0.221331
Aves	Pavo_cristatus	84	0.0839481	0.198318
Aves	Pavo_cristatus	85	0.0797937	0.188504
Aves	Pavo_cristatus	86	0.074923	0.176997
Aves	Pavo_cristatus	87	0.0772867	0.182581
Aves	Pavo_cristatus	88	0.0804384	0.190027
Aves	Pavo_cristatus	89	0.0787909	0.186135
Aves	Pavo_cristatus	90	0.0851658	0.201195
Aves	Pavo_cristatus	91	0.0853091	0.201533
Aves	Pavo_cristatus	92	0.0804384	0.190027
Aves	Pavo_cristatus	93	0.076069	0.179705
Aves	Pavo_cristatus	94	0.0758542	0.179197
Aves	Pavo_cristatus	95	0.0722728	0.170736
Aves	Pavo_cristatus	96	0.0739918	0.174798
Aves	Pavo_cristatus	97	0.0753528	0.178013
Aves	Pavo_cristatus	98	0.0749946	0.177167
Aves	Pavo_cristatus	99	0.0757109	0.178859
Aves	Pavo_cristatus	100	0.131008	0.309492
Aves	Coturnix_japonica	1	0.0810614	0.19637
Aves	Coturnix_japonica	2	0.054253	0.131427
Aves	Coturnix_japonica	3	0.0455289	0.110293
Aves	Coturnix_japonica	4	0.0428481	0.103799
Aves	Coturnix_japonica	5	0.0418939	0.101487
Aves	Coturnix_japonica	6	0.0440294	0.10666
Aves	Coturnix_japonica	7	0.0422119	0.102258
Aves	Coturnix_japonica	8	0.0409851	0.0992856
Aves	Coturnix_japonica	9	0.0417121	0.101047
Aves	Coturnix_japonica	10	0.0414849	0.100496
Aves	Coturnix_japonica	11	0.0433479	0.105009
Aves	Coturnix_japonica	12	0.0428935	0.103909
Aves	Coturnix_japonica	13	0.0404853	0.0980748
Aves	Coturnix_japonica	14	0.0409851	0.0992856
Aves	Coturnix_japonica	15	0.0422119	0.102258
Aves	Coturnix_japonica	16	0.0458015	0.110953
Aves	Coturnix_japonica	17	0.0462105	0.111944
Aves	Coturnix_japonica	18	0.0454835	0.110183
Aves	Coturnix_japonica	19	0.0492094	0.119209
Aves	Coturnix_japonica	20	0.056116	0.13594
Aves	Coturnix_japonica	21	0.0548437	0.132858
Aves	Coturnix_japonica	22	0.0559796	0.13561
Aves	Coturnix_japonica	23	0.050618	0.122621
Aves	Coturnix_japonica	24	0.0522992	0.126694
Aves	Coturnix_japonica	25	0.0519357	0.125813
Aves	Coturnix_japonica	26	0.0533442	0.129225
Aves	Coturnix_japonica	27	0.0543893	0.131757
Aves	Coturnix_japonica	28	0.0554798	0.134399
Aves	Coturnix_japonica	29	0.0565249	0.13693
Aves	Coturnix_japonica	30	0.0532079	0.128895
Aves	Coturnix_japonica	31	0.0536623	0.129996
Aves	Coturnix_japonica	32	0.0558433	0.135279
Aves	Coturnix_japonica	33	0.0538895	0.130546
Aves	Coturnix_japonica	34	0.05239	0.126914
Aves	Coturnix_japonica	35	0.050209	0.12163
Aves	Coturnix_japonica	36	0.0505271	0.122401
Aves	Coturnix_japonica	37	0.0457107	0.110733
Aves	Coturnix_japonica	38	0.0422119	0.102258
Aves	Coturnix_japonica	39	0.0443475	0.107431
Aves	Coturnix_japonica	40	0.0481643	0.116677
Aves	Coturnix_japonica	41	0.0527535	0.127794
Aves	Coturnix_japonica	42	0.0537986	0.130326
Aves	Coturnix_japonica	43	0.0543439	0.131647
Aves	Coturnix_japonica	44	0.0551618	0.133628
Aves	Coturnix_japonica	45	0.0586605	0.142104
Aves	Coturnix_japonica	46	0.05757	0.139462
Aves	Coturnix_japonica	47	0.0551163	0.133518
Aves	Coturnix_japonica	48	0.0562523	0.13627
Aves	Coturnix_japonica	49	0.0618866	0.149919
Aves	Coturnix_japonica	50	0.0632043	0.153111
Aves	Coturnix_japonica	51	0.0647492	0.156854
Aves	Coturnix_japonica	52	0.0651581	0.157844
Aves	Coturnix_japonica	53	0.063386	0.153551
Aves	Coturnix_japonica	54	0.065976	0.159826
Aves	Coturnix_japonica	55	0.0632952	0.153331
Aves	Coturnix_japonica	56	0.0593421	0.143755
Aves	Coturnix_japonica	57	0.0606143	0.146837
Aves	Coturnix_japonica	58	0.0594784	0.144085
Aves	Coturnix_japonica	59	0.0560251	0.13572
Aves	Coturnix_japonica	60	0.059024	0.142984
Aves	Coturnix_japonica	61	0.0605234	0.146617
Aves	Coturnix_japonica	62	0.0621138	0.150469
Aves	Coturnix_japonica	63	0.0614322	0.148818
Aves	Coturnix_japonica	64	0.0585696	0.141884
Aves	Coturnix_japonica	65	0.0590694	0.143095
Aves	Coturnix_japonica	66	0.0667939	0.161807
Aves	Coturnix_japonica	67	0.0671574	0.162687
Aves	Coturnix_japonica	68	0.0637041	0.154322
Aves	Coturnix_japonica	69	0.0687932	0.16665
Aves	Coturnix_japonica	70	0.067839	0.164339
Aves	Coturnix_japonica	71	0.0669302	0.162137
Aves	Coturnix_japonica	72	0.0696565	0.168741
Aves	Coturnix_japonica	73	0.0692021	0.167641
Aves	Coturnix_japonica	74	0.0669302	0.162137
Aves	Coturnix_japonica	75	0.0670665	0.162467
Aves	Coturnix_japonica	76	0.0713377	0.172814
Aves	Coturnix_japonica	77	0.0724736	0.175566
Aves	Coturnix_japonica	78	0.068157	0.165109
Aves	Coturnix_japonica	79	0.0669756	0.162247
Aves	Coturnix_japonica	80	0.0719738	0.174355
Aves	Coturnix_japonica	81	0.0742912	0.179969
Aves	Coturnix_japonica	82	0.0800164	0.193838
Aves	Coturnix_japonica	83	0.0698837	0.169292
Aves	Coturnix_japonica	84	0.0693384	0.167971
Aves	Coturnix_japonica	85	0.0689749	0.16709
Aves	Coturnix_japonica	86	0.0683842	0.165659
Aves	Coturnix_japonica	87	0.0585696	0.141884
Aves	Coturnix_japonica	88	0.0572519	0.138692
Aves	Coturnix_japonica	89	0.0581152	0.140783
Aves	Coturnix_japonica	90	0.0585696	0.141884
Aves	Coturnix_japonica	91	0.0584787	0.141664
Aves	Coturnix_japonica	92	0.0635224	0.153882
Aves	Coturnix_japonica	93	0.0659306	0.159716
Aves	Coturnix_japonica	94	0.0686569	0.16632
Aves	Coturnix_japonica	95	0.0625682	0.15157
Aves	Coturnix_japonica	96	0.0607961	0.147277
Aves	Coturnix_japonica	97	0.054253	0.131427
Aves	Coturnix_japonica	98	0.0534806	0.129556
Aves	Coturnix_japonica	99	0.0495274	0.119979
[truncated: 7,301 more rows]

## Sheet: G4 density 3 UTR
clade	species	bin_num	count	normalized_density
Amphibians	Xenopus_tropicalis	1	0.0487138	0.119602
Amphibians	Xenopus_tropicalis	2	0.0321862	0.0790232
Amphibians	Xenopus_tropicalis	3	0.03613	0.0887062
Amphibians	Xenopus_tropicalis	4	0.0345829	0.0849076
Amphibians	Xenopus_tropicalis	5	0.0334059	0.082018
Amphibians	Xenopus_tropicalis	6	0.034466	0.0846206
Amphibians	Xenopus_tropicalis	7	0.033593	0.0824773
Amphibians	Xenopus_tropicalis	8	0.0327434	0.0803915
Amphibians	Xenopus_tropicalis	9	0.0313054	0.0768608
Amphibians	Xenopus_tropicalis	10	0.0313756	0.077033
Amphibians	Xenopus_tropicalis	11	0.0319952	0.0785544
Amphibians	Xenopus_tropicalis	12	0.0341659	0.0838838
Amphibians	Xenopus_tropicalis	13	0.0356156	0.0874432
Amphibians	Xenopus_tropicalis	14	0.0327473	0.080401
Amphibians	Xenopus_tropicalis	15	0.0341932	0.0839508
Amphibians	Xenopus_tropicalis	16	0.0356	0.0874049
Amphibians	Xenopus_tropicalis	17	0.0332228	0.0815683
Amphibians	Xenopus_tropicalis	18	0.0323265	0.0793677
Amphibians	Xenopus_tropicalis	19	0.0316756	0.0777698
Amphibians	Xenopus_tropicalis	20	0.0321316	0.0788893
Amphibians	Xenopus_tropicalis	21	0.0334839	0.0822094
Amphibians	Xenopus_tropicalis	22	0.0342594	0.0841135
Amphibians	Xenopus_tropicalis	23	0.035752	0.0877781
Amphibians	Xenopus_tropicalis	24	0.035261	0.0865725
Amphibians	Xenopus_tropicalis	25	0.0338424	0.0830897
Amphibians	Xenopus_tropicalis	26	0.0341893	0.0839412
Amphibians	Xenopus_tropicalis	27	0.0327123	0.0803149
Amphibians	Xenopus_tropicalis	28	0.033254	0.0816449
Amphibians	Xenopus_tropicalis	29	0.0332384	0.0816066
Amphibians	Xenopus_tropicalis	30	0.0332696	0.0816832
Amphibians	Xenopus_tropicalis	31	0.033784	0.0829462
Amphibians	Xenopus_tropicalis	32	0.0329188	0.080822
Amphibians	Xenopus_tropicalis	33	0.0346647	0.0851086
Amphibians	Xenopus_tropicalis	34	0.0364769	0.0895577
Amphibians	Xenopus_tropicalis	35	0.0351791	0.0863715
Amphibians	Xenopus_tropicalis	36	0.035148	0.086295
Amphibians	Xenopus_tropicalis	37	0.0352376	0.0865151
Amphibians	Xenopus_tropicalis	38	0.0340334	0.0835585
Amphibians	Xenopus_tropicalis	39	0.0315314	0.0774158
Amphibians	Xenopus_tropicalis	40	0.0332306	0.0815875
Amphibians	Xenopus_tropicalis	41	0.0310248	0.0761719
Amphibians	Xenopus_tropicalis	42	0.0309664	0.0760284
Amphibians	Xenopus_tropicalis	43	0.0320303	0.0786405
Amphibians	Xenopus_tropicalis	44	0.0332384	0.0816066
Amphibians	Xenopus_tropicalis	45	0.0318705	0.0782482
Amphibians	Xenopus_tropicalis	46	0.0317341	0.0779133
Amphibians	Xenopus_tropicalis	47	0.0311378	0.0764494
Amphibians	Xenopus_tropicalis	48	0.0303117	0.0744209
Amphibians	Xenopus_tropicalis	49	0.0309079	0.0758849
Amphibians	Xenopus_tropicalis	50	0.031547	0.077454
Amphibians	Xenopus_tropicalis	51	0.0305844	0.0750907
Amphibians	Xenopus_tropicalis	52	0.0313911	0.0770713
Amphibians	Xenopus_tropicalis	53	0.0317341	0.0779133
Amphibians	Xenopus_tropicalis	54	0.0306975	0.0753682
Amphibians	Xenopus_tropicalis	55	0.0301986	0.0741435
Amphibians	Xenopus_tropicalis	56	0.0297154	0.072957
Amphibians	Xenopus_tropicalis	57	0.0309391	0.0759614
Amphibians	Xenopus_tropicalis	58	0.0318042	0.0780855
Amphibians	Xenopus_tropicalis	59	0.032229	0.0791285
Amphibians	Xenopus_tropicalis	60	0.0327434	0.0803915
Amphibians	Xenopus_tropicalis	61	0.0327785	0.0804776
Amphibians	Xenopus_tropicalis	62	0.033593	0.0824773
Amphibians	Xenopus_tropicalis	63	0.0321004	0.0788127
Amphibians	Xenopus_tropicalis	64	0.0329305	0.0808507
Amphibians	Xenopus_tropicalis	65	0.0341074	0.0837403
Amphibians	Xenopus_tropicalis	66	0.0330981	0.0812622
Amphibians	Xenopus_tropicalis	67	0.0338463	0.0830992
Amphibians	Xenopus_tropicalis	68	0.0331098	0.0812909
Amphibians	Xenopus_tropicalis	69	0.0347232	0.0852521
Amphibians	Xenopus_tropicalis	70	0.0347115	0.0852234
Amphibians	Xenopus_tropicalis	71	0.035261	0.0865725
Amphibians	Xenopus_tropicalis	72	0.0345088	0.0847258
Amphibians	Xenopus_tropicalis	73	0.0336904	0.0827165
Amphibians	Xenopus_tropicalis	74	0.0342711	0.0841422
Amphibians	Xenopus_tropicalis	75	0.0346141	0.0849842
Amphibians	Xenopus_tropicalis	76	0.0339593	0.0833767
Amphibians	Xenopus_tropicalis	77	0.0340412	0.0835776
Amphibians	Xenopus_tropicalis	78	0.0323537	0.0794346
Amphibians	Xenopus_tropicalis	79	0.0313483	0.0769661
Amphibians	Xenopus_tropicalis	80	0.0310599	0.076258
Amphibians	Xenopus_tropicalis	81	0.0333436	0.081865
Amphibians	Xenopus_tropicalis	82	0.0331604	0.0814153
Amphibians	Xenopus_tropicalis	83	0.0310365	0.0762006
Amphibians	Xenopus_tropicalis	84	0.0313249	0.0769087
Amphibians	Xenopus_tropicalis	85	0.0326733	0.0802192
Amphibians	Xenopus_tropicalis	86	0.0333085	0.0817788
Amphibians	Xenopus_tropicalis	87	0.0339399	0.0833289
Amphibians	Xenopus_tropicalis	88	0.0337099	0.0827644
Amphibians	Xenopus_tropicalis	89	0.0368198	0.0903997
Amphibians	Xenopus_tropicalis	90	0.0354792	0.0871083
Amphibians	Xenopus_tropicalis	91	0.0341074	0.0837403
Amphibians	Xenopus_tropicalis	92	0.032989	0.0809943
Amphibians	Xenopus_tropicalis	93	0.0312742	0.0767843
Amphibians	Xenopus_tropicalis	94	0.0296063	0.0726891
Amphibians	Xenopus_tropicalis	95	0.0302493	0.0742679
Amphibians	Xenopus_tropicalis	96	0.0310482	0.0762293
Amphibians	Xenopus_tropicalis	97	0.0304208	0.0746889
Amphibians	Xenopus_tropicalis	98	0.0300428	0.0737607
Amphibians	Xenopus_tropicalis	99	0.0303506	0.0745166
Amphibians	Xenopus_tropicalis	100	0.0474472	0.116492
Amphibians	Leptobrachium_leishanense	1	0.0182562	0.0417379
Amphibians	Leptobrachium_leishanense	2	0.0155606	0.0355753
Amphibians	Leptobrachium_leishanense	3	0.016112	0.0368358
Amphibians	Leptobrachium_leishanense	4	0.0183327	0.041913
Amphibians	Leptobrachium_leishanense	5	0.0186237	0.0425783
Amphibians	Leptobrachium_leishanense	6	0.0190985	0.0436638
Amphibians	Leptobrachium_leishanense	7	0.0170156	0.0389017
Amphibians	Leptobrachium_leishanense	8	0.0151165	0.0345598
Amphibians	Leptobrachium_leishanense	9	0.0159588	0.0364857
Amphibians	Leptobrachium_leishanense	10	0.0163264	0.037326
Amphibians	Leptobrachium_leishanense	11	0.0155606	0.0355753
Amphibians	Leptobrachium_leishanense	12	0.0128957	0.0294827
Amphibians	Leptobrachium_leishanense	13	0.014121	0.0322839
Amphibians	Leptobrachium_leishanense	14	0.0136155	0.0311284
Amphibians	Leptobrachium_leishanense	15	0.0158823	0.0363106
Amphibians	Leptobrachium_leishanense	16	0.0164336	0.0375711
Amphibians	Leptobrachium_leishanense	17	0.0171841	0.0392869
Amphibians	Leptobrachium_leishanense	18	0.0175517	0.0401272
Amphibians	Leptobrachium_leishanense	19	0.0172453	0.0394269
Amphibians	Leptobrachium_leishanense	20	0.0171228	0.0391468
Amphibians	Leptobrachium_leishanense	21	0.0147948	0.0338245
Amphibians	Leptobrachium_leishanense	22	0.0138912	0.0317586
Amphibians	Leptobrachium_leishanense	23	0.0129876	0.0296928
Amphibians	Leptobrachium_leishanense	24	0.0138147	0.0315836
Amphibians	Leptobrachium_leishanense	25	0.0143201	0.0327391
Amphibians	Leptobrachium_leishanense	26	0.0143354	0.0327741
Amphibians	Leptobrachium_leishanense	27	0.0130336	0.0297978
Amphibians	Leptobrachium_leishanense	28	0.0127119	0.0290625
Amphibians	Leptobrachium_leishanense	29	0.014948	0.0341747
Amphibians	Leptobrachium_leishanense	30	0.0137534	0.0314435
Amphibians	Leptobrachium_leishanense	31	0.0159129	0.0363806
Amphibians	Leptobrachium_leishanense	32	0.016066	0.0367308
Amphibians	Leptobrachium_leishanense	33	0.0158669	0.0362756
Amphibians	Leptobrachium_leishanense	34	0.0146417	0.0334744
Amphibians	Leptobrachium_leishanense	35	0.0126047	0.0288174
Amphibians	Leptobrachium_leishanense	36	0.0133858	0.0306031
Amphibians	Leptobrachium_leishanense	37	0.0131867	0.0301479
Amphibians	Leptobrachium_leishanense	38	0.0134471	0.0307432
Amphibians	Leptobrachium_leishanense	39	0.0119155	0.0272417
Amphibians	Leptobrachium_leishanense	40	0.0109047	0.0249307
Amphibians	Leptobrachium_leishanense	41	0.0104759	0.0239503
Amphibians	Leptobrachium_leishanense	42	0.010629	0.0243004
Amphibians	Leptobrachium_leishanense	43	0.0115326	0.0263663
Amphibians	Leptobrachium_leishanense	44	0.0107056	0.0244755
Amphibians	Leptobrachium_leishanense	45	0.0112263	0.025666
Amphibians	Leptobrachium_leishanense	46	0.0126047	0.0288174
Amphibians	Leptobrachium_leishanense	47	0.0135543	0.0309883
Amphibians	Leptobrachium_leishanense	48	0.0134624	0.0307782
Amphibians	Leptobrachium_leishanense	49	0.0135237	0.0309183
Amphibians	Leptobrachium_leishanense	50	0.0137381	0.0314085
Amphibians	Leptobrachium_leishanense	51	0.0136462	0.0311984
Amphibians	Leptobrachium_leishanense	52	0.0146723	0.0335444
Amphibians	Leptobrachium_leishanense	53	0.0151471	0.0346299
Amphibians	Leptobrachium_leishanense	54	0.0158363	0.0362055
Amphibians	Leptobrachium_leishanense	55	0.0144885	0.0331242
Amphibians	Leptobrachium_leishanense	56	0.0143813	0.0328791
Amphibians	Leptobrachium_leishanense	57	0.015484	0.0354002
Amphibians	Leptobrachium_leishanense	58	0.0151012	0.0345248
Amphibians	Leptobrachium_leishanense	59	0.014412	0.0329492
Amphibians	Leptobrachium_leishanense	60	0.0151777	0.0346999
Amphibians	Leptobrachium_leishanense	61	0.014703	0.0336144
Amphibians	Leptobrachium_leishanense	62	0.0156372	0.0357504
Amphibians	Leptobrachium_leishanense	63	0.0136002	0.0310934
Amphibians	Leptobrachium_leishanense	64	0.0119921	0.0274168
Amphibians	Leptobrachium_leishanense	65	0.011211	0.025631
Amphibians	Leptobrachium_leishanense	66	0.0141975	0.0324589
Amphibians	Leptobrachium_leishanense	67	0.0137228	0.0313735
Amphibians	Leptobrachium_leishanense	68	0.0131561	0.0300779
Amphibians	Leptobrachium_leishanense	69	0.0104299	0.0238452
Amphibians	Leptobrachium_leishanense	70	0.0111804	0.025561
Amphibians	Leptobrachium_leishanense	71	0.0134777	0.0308132
Amphibians	Leptobrachium_leishanense	72	0.0146723	0.0335444
Amphibians	Leptobrachium_leishanense	73	0.0148561	0.0339646
Amphibians	Leptobrachium_leishanense	74	0.0146876	0.0335794
Amphibians	Leptobrachium_leishanense	75	0.016112	0.0368358
Amphibians	Leptobrachium_leishanense	76	0.0160354	0.0366607
Amphibians	Leptobrachium_leishanense	77	0.0178426	0.0407925
Amphibians	Leptobrachium_leishanense	78	0.015775	0.0360655
Amphibians	Leptobrachium_leishanense	79	0.016357	0.0373961
Amphibians	Leptobrachium_leishanense	80	0.0162958	0.037256
Amphibians	Leptobrachium_leishanense	81	0.0149786	0.0342447
Amphibians	Leptobrachium_leishanense	82	0.0152696	0.03491
Amphibians	Leptobrachium_leishanense	83	0.0142741	0.032634
Amphibians	Leptobrachium_leishanense	84	0.0129417	0.0295877
Amphibians	Leptobrachium_leishanense	85	0.013784	0.0315135
Amphibians	Leptobrachium_leishanense	86	0.0150552	0.0344198
Amphibians	Leptobrachium_leishanense	87	0.0158516	0.0362406
Amphibians	Leptobrachium_leishanense	88	0.014075	0.0321788
Amphibians	Leptobrachium_leishanense	89	0.0143047	0.032704
Amphibians	Leptobrachium_leishanense	90	0.0126813	0.0289925
Amphibians	Leptobrachium_leishanense	91	0.0136002	0.0310934
Amphibians	Leptobrachium_leishanense	92	0.0129876	0.0296928
Amphibians	Leptobrachium_leishanense	93	0.0122984	0.0281171
Amphibians	Leptobrachium_leishanense	94	0.0104452	0.0238803
Amphibians	Leptobrachium_leishanense	95	0.0106903	0.0244405
Amphibians	Leptobrachium_leishanense	96	0.00990918	0.0226547
Amphibians	Leptobrachium_leishanense	97	0.00897493	0.0205188
Amphibians	Leptobrachium_leishanense	98	0.00879114	0.0200986
Amphibians	Leptobrachium_leishanense	99	0.010675	0.0244055
Amphibians	Leptobrachium_leishanense	100	0.0168625	0.0385516
Aves	Aquila_chrysaetos	1	0.0642433	0.152561
Aves	Aquila_chrysaetos	2	0.0472941	0.112311
Aves	Aquila_chrysaetos	3	0.0527971	0.125379
Aves	Aquila_chrysaetos	4	0.0516965	0.122765
Aves	Aquila_chrysaetos	5	0.0508789	0.120824
Aves	Aquila_chrysaetos	6	0.047923	0.113804
Aves	Aquila_chrysaetos	7	0.0473884	0.112535
Aves	Aquila_chrysaetos	8	0.0514449	0.122168
Aves	Aquila_chrysaetos	9	0.0500299	0.118808
Aves	Aquila_chrysaetos	10	0.0507846	0.1206
Aves	Aquila_chrysaetos	11	0.05025	0.11933
Aves	Aquila_chrysaetos	12	0.0535518	0.127171
Aves	Aquila_chrysaetos	13	0.0540863	0.128441
Aves	Aquila_chrysaetos	14	0.0529858	0.125827
Aves	Aquila_chrysaetos	15	0.0463193	0.109996
Aves	Aquila_chrysaetos	16	0.0443697	0.105366
Aves	Aquila_chrysaetos	17	0.0438351	0.104097
Aves	Aquila_chrysaetos	18	0.0444326	0.105515
Aves	Aquila_chrysaetos	19	0.044464	0.10559
Aves	Aquila_chrysaetos	20	0.0464451	0.110295
Aves	Aquila_chrysaetos	21	0.0480488	0.114103
Aves	Aquila_chrysaetos	22	0.0456275	0.108353
Aves	Aquila_chrysaetos	23	0.0435521	0.103425
Aves	Aquila_chrysaetos	24	0.0414452	0.0984214
Aves	Aquila_chrysaetos	25	0.0397786	0.0944636
Aves	Aquila_chrysaetos	26	0.0476086	0.113058
Aves	Aquila_chrysaetos	27	0.0485205	0.115223
Aves	Aquila_chrysaetos	28	0.0456904	0.108502
Aves	Aquila_chrysaetos	29	0.04242	0.100736
Aves	Aquila_chrysaetos	30	0.0443697	0.105366
Aves	Aquila_chrysaetos	31	0.0445583	0.105814
Aves	Aquila_chrysaetos	32	0.0451244	0.107158
Aves	Aquila_chrysaetos	33	0.0428917	0.101856
Aves	Aquila_chrysaetos	34	0.0469797	0.111564
Aves	Aquila_chrysaetos	35	0.0505959	0.120152
Aves	Aquila_chrysaetos	36	0.0525455	0.124782
Aves	Aquila_chrysaetos	37	0.0495267	0.117613
Aves	Aquila_chrysaetos	38	0.0503443	0.119554
Aves	Aquila_chrysaetos	39	0.0504701	0.119853
Aves	Aquila_chrysaetos	40	0.0493381	0.117165
Aves	Aquila_chrysaetos	41	0.0496525	0.117911
Aves	Aquila_chrysaetos	42	0.051382	0.122019
Aves	Aquila_chrysaetos	43	0.0518852	0.123213
Aves	Aquila_chrysaetos	44	0.0491808	0.116791
Aves	Aquila_chrysaetos	45	0.0461621	0.109623
Aves	Aquila_chrysaetos	46	0.0456589	0.108428
Aves	Aquila_chrysaetos	47	0.0457847	0.108726
Aves	Aquila_chrysaetos	48	0.042766	0.101558
Aves	Aquila_chrysaetos	49	0.0423886	0.100662
Aves	Aquila_chrysaetos	50	0.0474828	0.112759
Aves	Aquila_chrysaetos	51	0.0473884	0.112535
Aves	Aquila_chrysaetos	52	0.0468224	0.111191
Aves	Aquila_chrysaetos	53	0.0463193	0.109996
Aves	Aquila_chrysaetos	54	0.0501557	0.119106
Aves	Aquila_chrysaetos	55	0.0529858	0.125827
Aves	Aquila_chrysaetos	56	0.05547	0.131726
Aves	Aquila_chrysaetos	57	0.0489607	0.116269
Aves	Aquila_chrysaetos	58	0.0533631	0.126723
Aves	Aquila_chrysaetos	59	0.0485205	0.115223
Aves	Aquila_chrysaetos	60	0.0450929	0.107084
Aves	Aquila_chrysaetos	61	0.0512877	0.121795
Aves	Aquila_chrysaetos	62	0.0533631	0.126723
Aves	Aquila_chrysaetos	63	0.0485519	0.115298
Aves	Aquila_chrysaetos	64	0.0437722	0.103947
Aves	Aquila_chrysaetos	65	0.0443068	0.105217
Aves	Aquila_chrysaetos	66	0.0448728	0.106561
Aves	Aquila_chrysaetos	67	0.0483633	0.11485
Aves	Aquila_chrysaetos	68	0.053143	0.1262
Aves	Aquila_chrysaetos	69	0.0453445	0.107681
Aves	Aquila_chrysaetos	70	0.0445583	0.105814
Aves	Aquila_chrysaetos	71	0.0474828	0.112759
Aves	Aquila_chrysaetos	72	0.0457847	0.108726
Aves	Aquila_chrysaetos	73	0.0440238	0.104545
Aves	Aquila_chrysaetos	74	0.0485834	0.115373
Aves	Aquila_chrysaetos	75	0.0472941	0.112311
Aves	Aquila_chrysaetos	76	0.0528285	0.125454
Aves	Aquila_chrysaetos	77	0.0518537	0.123139
Aves	Aquila_chrysaetos	78	0.0501871	0.119181
Aves	Aquila_chrysaetos	79	0.0476715	0.113207
Aves	Aquila_chrysaetos	80	0.0419484	0.0996162
Aves	Aquila_chrysaetos	81	0.0464451	0.110295
Aves	Aquila_chrysaetos	82	0.0458162	0.108801
Aves	Aquila_chrysaetos	83	0.0439923	0.10447
Aves	Aquila_chrysaetos	84	0.0468224	0.111191
Aves	Aquila_chrysaetos	85	0.0457847	0.108726
Aves	Aquila_chrysaetos	86	0.0481431	0.114327
Aves	Aquila_chrysaetos	87	0.0474828	0.112759
Aves	Aquila_chrysaetos	88	0.045942	0.1091
Aves	Aquila_chrysaetos	89	0.0454388	0.107905
Aves	Aquila_chrysaetos	90	0.0439609	0.104395
Aves	Aquila_chrysaetos	91	0.0444326	0.105515
Aves	Aquila_chrysaetos	92	0.0427345	0.101483
Aves	Aquila_chrysaetos	93	0.0391183	0.0928954
Aves	Aquila_chrysaetos	94	0.0421999	0.100214
Aves	Aquila_chrysaetos	95	0.0421685	0.100139
Aves	Aquila_chrysaetos	96	0.0327034	0.0776618
Aves	Aquila_chrysaetos	97	0.0302192	0.0717625
Aves	Aquila_chrysaetos	98	0.024559	0.058321
Aves	Aquila_chrysaetos	99	0.024276	0.0576489
Aves	Aquila_chrysaetos	100	0.0428917	0.101856
Aves	Meleagris_gallopavo	1	0.0438238	0.105957
Aves	Meleagris_gallopavo	2	0.036359	0.0879085
Aves	Meleagris_gallopavo	3	0.0313395	0.0757725
Aves	Meleagris_gallopavo	4	0.0280254	0.0677596
Aves	Meleagris_gallopavo	5	0.0265774	0.0642588
Aves	Meleagris_gallopavo	6	0.0225232	0.0544566
Aves	Meleagris_gallopavo	7	0.0217188	0.0525117
Aves	Meleagris_gallopavo	8	0.0221371	0.0535231
Aves	Meleagris_gallopavo	9	0.0242286	0.0585797
Aves	Meleagris_gallopavo	10	0.0248077	0.05998
Aves	Meleagris_gallopavo	11	0.022298	0.053912
Aves	Meleagris_gallopavo	12	0.0222658	0.0538342
Aves	Meleagris_gallopavo	13	0.0250008	0.0604468
Aves	Meleagris_gallopavo	14	0.0280575	0.0678374
Aves	Meleagris_gallopavo	15	0.0287332	0.0694711
Aves	Meleagris_gallopavo	16	0.0256765	0.0620805
Aves	Meleagris_gallopavo	17	0.0222658	0.0538342
Aves	Meleagris_gallopavo	18	0.0228128	0.0551568
Aves	Meleagris_gallopavo	19	0.0212684	0.0514226
Aves	Meleagris_gallopavo	20	0.0225876	0.0546122
Aves	Meleagris_gallopavo	21	0.0223945	0.0541454
Aves	Meleagris_gallopavo	22	0.020657	0.0499445
Aves	Meleagris_gallopavo	23	0.0204962	0.0495555
Aves	Meleagris_gallopavo	24	0.0216545	0.0523561
Aves	Meleagris_gallopavo	25	0.0227807	0.055079
Aves	Meleagris_gallopavo	26	0.0247434	0.0598245
Aves	Meleagris_gallopavo	27	0.029055	0.070249
Aves	Meleagris_gallopavo	28	0.0276071	0.0667482
Aves	Meleagris_gallopavo	29	0.022845	0.0552345
Aves	Meleagris_gallopavo	30	0.0219763	0.0531341
Aves	Meleagris_gallopavo	31	0.025226	0.0609914
Aves	Meleagris_gallopavo	32	0.024486	0.0592021
Aves	Meleagris_gallopavo	33	0.02558	0.0618471
Aves	Meleagris_gallopavo	34	0.0267705	0.0647256
Aves	Meleagris_gallopavo	35	0.0284115	0.0686931
Aves	Meleagris_gallopavo	36	0.0270601	0.0654257
Aves	Meleagris_gallopavo	37	0.0276392	0.066826
Aves	Meleagris_gallopavo	38	0.0284758	0.0688487
Aves	Meleagris_gallopavo	39	0.0276392	0.066826
Aves	Meleagris_gallopavo	40	0.0302455	0.0731274
Aves	Meleagris_gallopavo	41	0.0286689	0.0693155
Aves	Meleagris_gallopavo	42	0.0313073	0.0756947
Aves	Meleagris_gallopavo	43	0.0321439	0.0777173
Aves	Meleagris_gallopavo	44	0.0356833	0.0862748
Aves	Meleagris_gallopavo	45	0.0362624	0.0876751
Aves	Meleagris_gallopavo	46	0.0359407	0.0868972
Aves	Meleagris_gallopavo	47	0.0394479	0.0953768
Aves	Meleagris_gallopavo	48	0.0387078	0.0935875
Aves	Meleagris_gallopavo	49	0.0388365	0.0938987
Aves	Meleagris_gallopavo	50	0.0392548	0.0949101
Aves	Meleagris_gallopavo	51	0.0323369	0.0781841
Aves	Meleagris_gallopavo	52	0.03179	0.0768616
Aves	Meleagris_gallopavo	53	0.0305994	0.0739832
Aves	Meleagris_gallopavo	54	0.0283149	0.0684597
Aves	Meleagris_gallopavo	55	0.0331413	0.080129
Aves	Meleagris_gallopavo	56	0.0362303	0.0875973
Aves	Meleagris_gallopavo	57	0.0360694	0.0872083
Aves	Meleagris_gallopavo	58	0.0322404	0.0779507
Aves	Meleagris_gallopavo	59	0.0300524	0.0726607
Aves	Meleagris_gallopavo	60	0.0283793	0.0686153
Aves	Meleagris_gallopavo	61	0.0296985	0.0718049
Aves	Meleagris_gallopavo	62	0.0299559	0.0724273
Aves	Meleagris_gallopavo	63	0.0324335	0.0784175
Aves	Meleagris_gallopavo	64	0.0318865	0.077095
Aves	Meleagris_gallopavo	65	0.0306638	0.0741388
Aves	Meleagris_gallopavo	66	0.0295376	0.0714159
Aves	Meleagris_gallopavo	67	0.0265453	0.064181
Aves	Meleagris_gallopavo	68	0.0265453	0.064181
Aves	Meleagris_gallopavo	69	0.0300846	0.0727385
Aves	Meleagris_gallopavo	70	0.030889	0.0746833
Aves	Meleagris_gallopavo	71	0.0289585	0.0700156
Aves	Meleagris_gallopavo	72	0.026127	0.0631696
Aves	Meleagris_gallopavo	73	0.0242608	0.0586575
Aves	Meleagris_gallopavo	74	0.0268348	0.0648811
Aves	Meleagris_gallopavo	75	0.0236172	0.0571016
Aves	Meleagris_gallopavo	76	0.026127	0.0631696
Aves	Meleagris_gallopavo	77	0.0278001	0.067215
Aves	Meleagris_gallopavo	78	0.0262235	0.063403
Aves	Meleagris_gallopavo	79	0.0307603	0.0743721
Aves	Meleagris_gallopavo	80	0.029602	0.0715715
Aves	Meleagris_gallopavo	81	0.0236494	0.0571794
Aves	Meleagris_gallopavo	82	0.0257409	0.0622361
Aves	Meleagris_gallopavo	83	0.0235529	0.056946
Aves	Meleagris_gallopavo	84	0.0253226	0.0612248
Aves	Meleagris_gallopavo	85	0.0249365	0.0602912
Aves	Meleagris_gallopavo	86	0.02632	0.0636364
Aves	Meleagris_gallopavo	87	0.0272853	0.0659703
Aves	Meleagris_gallopavo	88	0.0286689	0.0693155
Aves	Meleagris_gallopavo	89	0.0285402	0.0690043
Aves	Meleagris_gallopavo	90	0.0238425	0.0576462
Aves	Meleagris_gallopavo	91	0.0232633	0.0562459
Aves	Meleagris_gallopavo	92	0.0194987	0.0471439
Aves	Meleagris_gallopavo	93	0.02011	0.048622
Aves	Meleagris_gallopavo	94	0.0198205	0.0479218
Aves	Meleagris_gallopavo	95	0.0251939	0.0609136
Aves	Meleagris_gallopavo	96	0.0238103	0.0575684
Aves	Meleagris_gallopavo	97	0.0208179	0.0503335
Aves	Meleagris_gallopavo	98	0.0168281	0.0406869
Aves	Meleagris_gallopavo	99	0.0197239	0.0476884
Aves	Meleagris_gallopavo	100	0.0366485	0.0886087
Aves	Amazona_collaria	1	0.0491385	0.116029
Aves	Amazona_collaria	2	0.0330372	0.0780098
Aves	Amazona_collaria	3	0.0365225	0.0862397
Aves	Amazona_collaria	4	0.0398606	0.0941218
Aves	Amazona_collaria	5	0.0473713	0.111857
Aves	Amazona_collaria	6	0.0413333	0.0975992
Aves	Amazona_collaria	7	0.0392715	0.0927308
Aves	Amazona_collaria	8	0.0428059	0.101077
Aves	Amazona_collaria	9	0.048304	0.114059
Aves	Amazona_collaria	10	0.0476167	0.112436
Aves	Amazona_collaria	11	0.0439841	0.103859
Aves	Amazona_collaria	12	0.0414314	0.097831
Aves	Amazona_collaria	13	0.0396642	0.0936582
Aves	Amazona_collaria	14	0.0340189	0.0803281
Aves	Amazona_collaria	15	0.0407442	0.0962083
Aves	Amazona_collaria	16	0.0409896	0.0967878
Aves	Amazona_collaria	17	0.0414805	0.097947
Aves	Amazona_collaria	18	0.0410387	0.0969037
Aves	Amazona_collaria	19	0.0412842	0.0974833
Aves	Amazona_collaria	20	0.0433459	0.102352
Aves	Amazona_collaria	21	0.0434441	0.102583
Aves	Amazona_collaria	22	0.0409406	0.0966719
Aves	Amazona_collaria	23	0.0431987	0.102004
Aves	Amazona_collaria	24	0.0377497	0.0891375
Aves	Amazona_collaria	25	0.035148	0.0829941
Aves	Amazona_collaria	26	0.0347553	0.0820668
Aves	Amazona_collaria	27	0.037897	0.0894853
Aves	Amazona_collaria	28	0.0393206	0.0928468
Aves	Amazona_collaria	29	0.0400569	0.0945855
Aves	Amazona_collaria	30	0.045015	0.106293
Aves	Amazona_collaria	31	0.0442786	0.104554
Aves	Amazona_collaria	32	0.0495312	0.116957
Aves	Amazona_collaria	33	0.0475185	0.112204
Aves	Amazona_collaria	34	0.0435914	0.102931
Aves	Amazona_collaria	35	0.0413333	0.0975992
Aves	Amazona_collaria	36	0.0378479	0.0893694
Aves	Amazona_collaria	37	0.038437	0.0907603
Aves	Amazona_collaria	38	0.0367189	0.0867033
Aves	Amazona_collaria	39	0.0404497	0.0955128
Aves	Amazona_collaria	40	0.0401551	0.0948173
Aves	Amazona_collaria	41	0.0380443	0.089833
Aves	Amazona_collaria	42	0.0455059	0.107452
Aves	Amazona_collaria	43	0.0471258	0.111277
Aves	Amazona_collaria	44	0.0431496	0.101888
Aves	Amazona_collaria	45	0.0513475	0.121246
Aves	Amazona_collaria	46	0.0512002	0.120898
Aves	Amazona_collaria	47	0.0408424	0.0964401
Aves	Amazona_collaria	48	0.0388788	0.0918035
Aves	Amazona_collaria	49	0.0356389	0.0841532
Aves	Amazona_collaria	50	0.0379461	0.0896012
Aves	Amazona_collaria	51	0.0350007	0.0826464
Aves	Amazona_collaria	52	0.0360807	0.0851965
Aves	Amazona_collaria	53	0.0372098	0.0878625
Aves	Amazona_collaria	54	0.0381425	0.0900648
Aves	Amazona_collaria	55	0.0377497	0.0891375
Aves	Amazona_collaria	56	0.0525256	0.124028
Aves	Amazona_collaria	57	0.053802	0.127041
Aves	Amazona_collaria	58	0.0533111	0.125882
Aves	Amazona_collaria	59	0.0529184	0.124955
Aves	Amazona_collaria	60	0.0577291	0.136314
Aves	Amazona_collaria	61	0.0557655	0.131678
Aves	Amazona_collaria	62	0.0517402	0.122173
Aves	Amazona_collaria	63	0.043935	0.103743
Aves	Amazona_collaria	64	0.0459477	0.108495
Aves	Amazona_collaria	65	0.039566	0.0934263
Aves	Amazona_collaria	66	0.0414314	0.097831
Aves	Amazona_collaria	67	0.0445241	0.105134
Aves	Amazona_collaria	68	0.0402042	0.0949332
Aves	Amazona_collaria	69	0.0382406	0.0902967
Aves	Amazona_collaria	70	0.0412351	0.0973674
Aves	Amazona_collaria	71	0.0420205	0.099222
Aves	Amazona_collaria	72	0.0422169	0.0996857
Aves	Amazona_collaria	73	0.044475	0.105018
Aves	Amazona_collaria	74	0.0496785	0.117305
Aves	Amazona_collaria	75	0.0442786	0.104554
Aves	Amazona_collaria	76	0.0507093	0.119739
Aves	Amazona_collaria	77	0.0546365	0.129012
Aves	Amazona_collaria	78	0.0513966	0.121361
Aves	Amazona_collaria	79	0.0424132	0.100149
Aves	Amazona_collaria	80	0.0404497	0.0955128
Aves	Amazona_collaria	81	0.0405969	0.0958605
Aves	Amazona_collaria	82	0.0410387	0.0969037
Aves	Amazona_collaria	83	0.0407933	0.0963242
Aves	Amazona_collaria	84	0.043935	0.103743
Aves	Amazona_collaria	85	0.0383879	0.0906444
Aves	Amazona_collaria	86	0.0390261	0.0921513
Aves	Amazona_collaria	87	0.0414805	0.097947
Aves	Amazona_collaria	88	0.0448186	0.105829
Aves	Amazona_collaria	89	0.041186	0.0972515
Aves	Amazona_collaria	90	0.0384861	0.0908762
Aves	Amazona_collaria	91	0.0369152	0.087167
Aves	Amazona_collaria	92	0.0303863	0.0717505
Aves	Amazona_collaria	93	0.03073	0.0725619
Aves	Amazona_collaria	94	0.0318099	0.075112
Aves	Amazona_collaria	95	0.027981	0.0660707
Aves	Amazona_collaria	96	0.0247901	0.0585363
Aves	Amazona_collaria	97	0.024692	0.0583045
Aves	Amazona_collaria	98	0.0249374	0.0588841
Aves	Amazona_collaria	99	0.0257719	0.0608546
Aves	Amazona_collaria	100	0.0416769	0.0984106
Aves	Apteryx_haastii	1	0.0514866	0.124394
Aves	Apteryx_haastii	2	0.0419144	0.101267
Aves	Apteryx_haastii	3	0.0465555	0.11248
Aves	Apteryx_haastii	4	0.0504714	0.121941
Aves	Apteryx_haastii	5	0.0516316	0.124744
Aves	Apteryx_haastii	6	0.0474257	0.114582
Aves	Apteryx_haastii	7	0.0430747	0.10407
Aves	Apteryx_haastii	8	0.0439449	0.106173
Aves	Apteryx_haastii	9	0.0406091	0.0981134
Aves	Apteryx_haastii	10	0.0427846	0.103369
Aves	Apteryx_haastii	11	0.0417694	0.100917
Aves	Apteryx_haastii	12	0.0448151	0.108275
Aves	Apteryx_haastii	13	0.0430747	0.10407
Aves	Apteryx_haastii	14	0.0397389	0.096011
Aves	Apteryx_haastii	15	0.0391588	0.0946094
Aves	Apteryx_haastii	16	0.0422045	0.101968
Aves	Apteryx_haastii	17	0.0439449	0.106173
Aves	Apteryx_haastii	18	0.0465555	0.11248
Aves	Apteryx_haastii	19	0.0453952	0.109677
Aves	Apteryx_haastii	20	0.0436548	0.105472
Aves	Apteryx_haastii	21	0.0440899	0.106523
Aves	Apteryx_haastii	22	0.039884	0.0963614
Aves	Apteryx_haastii	23	0.0462654	0.111779
Aves	Apteryx_haastii	24	0.0462654	0.111779
Aves	Apteryx_haastii	25	0.0497462	0.120189
Aves	Apteryx_haastii	26	0.0491661	0.118787
Aves	Apteryx_haastii	27	0.0507614	0.122642
Aves	Apteryx_haastii	28	0.0501813	0.12124
Aves	Apteryx_haastii	29	0.0482959	0.116685
Aves	Apteryx_haastii	30	0.0468455	0.113181
Aves	Apteryx_haastii	31	0.0414793	0.100216
Aves	Apteryx_haastii	32	0.039884	0.0963614
Aves	Apteryx_haastii	33	0.0411893	0.099515
Aves	Apteryx_haastii	34	0.0429297	0.10372
Aves	Apteryx_haastii	35	0.0497462	0.120189
Aves	Apteryx_haastii	36	0.0501813	0.12124
Aves	Apteryx_haastii	37	0.0511965	0.123693
Aves	Apteryx_haastii	38	0.0516316	0.124744
Aves	Apteryx_haastii	39	0.0542422	0.131051
Aves	Apteryx_haastii	40	0.0501813	0.12124
Aves	Apteryx_haastii	41	0.0516316	0.124744
Aves	Apteryx_haastii	42	0.0555475	0.134205
Aves	Apteryx_haastii	43	0.0567078	0.137008
Aves	Apteryx_haastii	44	0.0551124	0.133154
Aves	Apteryx_haastii	45	0.0564177	0.136308
Aves	Apteryx_haastii	46	0.0565627	0.136658
Aves	Apteryx_haastii	47	0.0539521	0.130351
Aves	Apteryx_haastii	48	0.0562727	0.135957
Aves	Apteryx_haastii	49	0.0545323	0.131752
Aves	Apteryx_haastii	50	0.057578	0.139111
Aves	Apteryx_haastii	51	0.0507614	0.122642
Aves	Apteryx_haastii	52	0.0436548	0.105472
Aves	Apteryx_haastii	53	0.0455402	0.110027
Aves	Apteryx_haastii	54	0.0446701	0.107925
Aves	Apteryx_haastii	55	0.0433648	0.104771
Aves	Apteryx_haastii	56	0.0467005	0.11283
Aves	Apteryx_haastii	57	0.0423495	0.102318
Aves	Apteryx_haastii	58	0.0416244	0.100566
Aves	Apteryx_haastii	59	0.0435098	0.105122
Aves	Apteryx_haastii	60	0.0453952	0.109677
Aves	Apteryx_haastii	61	0.0388687	0.0939085
Aves	Apteryx_haastii	62	0.0385787	0.0932077
Aves	Apteryx_haastii	63	0.0346628	0.0837468
Aves	Apteryx_haastii	64	0.0375635	0.0907549
Aves	Apteryx_haastii	65	0.0458303	0.110728
Aves	Apteryx_haastii	66	0.044525	0.107574
Aves	Apteryx_haastii	67	0.0416244	0.100566
Aves	Apteryx_haastii	68	0.0395939	0.0956606
Aves	Apteryx_haastii	69	0.0456853	0.110378
Aves	Apteryx_haastii	70	0.0485859	0.117386
Aves	Apteryx_haastii	71	0.0501813	0.12124
Aves	Apteryx_haastii	72	0.0427846	0.103369
Aves	Apteryx_haastii	73	0.0381436	0.0921565
Aves	Apteryx_haastii	74	0.0361131	0.0872508
Aves	Apteryx_haastii	75	0.0410442	0.0991646
Aves	Apteryx_haastii	76	0.0375635	0.0907549
Aves	Apteryx_haastii	77	0.0453952	0.109677
Aves	Apteryx_haastii	78	0.0416244	0.100566
Aves	Apteryx_haastii	79	0.0424946	0.102669
Aves	Apteryx_haastii	80	0.04438	0.107224
Aves	Apteryx_haastii	81	0.0439449	0.106173
Aves	Apteryx_haastii	82	0.0475707	0.114933
Aves	Apteryx_haastii	83	0.0467005	0.11283
Aves	Apteryx_haastii	84	0.0416244	0.100566
Aves	Apteryx_haastii	85	0.0426396	0.103019
Aves	Apteryx_haastii	86	0.0417694	0.100917
Aves	Apteryx_haastii	87	0.0432197	0.104421
Aves	Apteryx_haastii	88	0.0464104	0.11213
Aves	Apteryx_haastii	89	0.0455402	0.110027
Aves	Apteryx_haastii	90	0.0420595	0.101617
Aves	Apteryx_haastii	91	0.0427846	0.103369
Aves	Apteryx_haastii	92	0.0419144	0.101267
Aves	Apteryx_haastii	93	0.0414793	0.100216
Aves	Apteryx_haastii	94	0.0369833	0.0893533
Aves	Apteryx_haastii	95	0.0377085	0.0911053
Aves	Apteryx_haastii	96	0.0384336	0.0928573
Aves	Apteryx_haastii	97	0.0374184	0.0904045
Aves	Apteryx_haastii	98	0.0379985	0.0918061
Aves	Apteryx_haastii	99	0.0361131	0.0872508
Aves	Apteryx_haastii	100	0.0514866	0.124394
Aves	Gallus_gallus	1	0.057625	0.136552
Aves	Gallus_gallus	2	0.0406374	0.0962973
Aves	Gallus_gallus	3	0.039712	0.0941043
Aves	Gallus_gallus	4	0.0389464	0.0922901
Aves	Gallus_gallus	5	0.0399107	0.094575
Aves	Gallus_gallus	6	0.0394988	0.0935991
Aves	Gallus_gallus	7	0.0382487	0.0906368
Aves	Gallus_gallus	8	0.0393825	0.0933235
Aves	Gallus_gallus	9	0.0367806	0.0871578
Aves	Gallus_gallus	10	0.0382148	0.0905564
Aves	Gallus_gallus	11	0.0407101	0.0964695
Aves	Gallus_gallus	12	0.0378805	0.0897642
Aves	Gallus_gallus	13	0.0390676	0.0925772
Aves	Gallus_gallus	14	0.0405454	0.0960791
Aves	Gallus_gallus	15	0.0400318	0.0948621
Aves	Gallus_gallus	16	0.040744	0.0965499
Aves	Gallus_gallus	17	0.0405648	0.096125
Aves	Gallus_gallus	18	0.0369599	0.0875826
Aves	Gallus_gallus	19	0.0359521	0.0851944
Aves	Gallus_gallus	20	0.0356516	0.0844826
Aves	Gallus_gallus	21	0.0347601	0.0823699
Aves	Gallus_gallus	22	0.0356613	0.0845055
Aves	Gallus_gallus	23	0.0358551	0.0849648
Aves	Gallus_gallus	24	0.0351138	0.0832081
Aves	Gallus_gallus	25	0.0365335	0.0865722
Aves	Gallus_gallus	26	0.0371731	0.0880878
Aves	Gallus_gallus	27	0.036267	0.0859407
Aves	Gallus_gallus	28	0.0342029	0.0810495
Aves	Gallus_gallus	29	0.0354772	0.0840692
Aves	Gallus_gallus	30	0.0369502	0.0875597
Aves	Gallus_gallus	31	0.0358455	0.0849418
Aves	Gallus_gallus	32	0.0362767	0.0859637
Aves	Gallus_gallus	33	0.0337135	0.0798899
Aves	Gallus_gallus	34	0.0324586	0.0769161
Aves	Gallus_gallus	35	0.0323859	0.0767439
Aves	Gallus_gallus	36	0.0322987	0.0765372
Aves	Gallus_gallus	37	0.0331176	0.0784776
Aves	Gallus_gallus	38	0.0322406	0.0763994
Aves	Gallus_gallus	39	0.0332484	0.0787876
Aves	Gallus_gallus	40	0.0343967	0.0815088
Aves	Gallus_gallus	41	0.0367612	0.0871119
Aves	Gallus_gallus	42	0.034794	0.0824503
Aves	Gallus_gallus	43	0.0347165	0.0822666
Aves	Gallus_gallus	44	0.0355305	0.0841955
Aves	Gallus_gallus	45	0.0353755	0.0838281
Aves	Gallus_gallus	46	0.0368775	0.0873874
Aves	Gallus_gallus	47	0.0349539	0.0828292
Aves	Gallus_gallus	48	0.0363154	0.0860556
Aves	Gallus_gallus	49	0.036737	0.0870545
Aves	Gallus_gallus	50	0.0371149	0.08795
Aves	Gallus_gallus	51	0.0368678	0.0873645
Aves	Gallus_gallus	52	0.0354481	0.0840003
Aves	Gallus_gallus	53	0.0379774	0.0899938
Aves	Gallus_gallus	54	0.0376431	0.0892016
Aves	Gallus_gallus	55	0.036422	0.0863082
Aves	Gallus_gallus	56	0.0378514	0.0896953
Aves	Gallus_gallus	57	0.0372845	0.0883519
Aves	Gallus_gallus	58	0.0353609	0.0837937
Aves	Gallus_gallus	59	0.0348522	0.0825881
Aves	Gallus_gallus	60	0.0329237	0.0780184
Aves	Gallus_gallus	61	0.0312376	0.0740227
Aves	Gallus_gallus	62	0.0306319	0.0725875
Aves	Gallus_gallus	63	0.0327445	0.0775935
Aves	Gallus_gallus	64	0.0350218	0.0829899
Aves	Gallus_gallus	65	0.0361216	0.0855963
Aves	Gallus_gallus	66	0.0373475	0.0885012
Aves	Gallus_gallus	67	0.0369599	0.0875826
Aves	Gallus_gallus	68	0.03727	0.0883175
Aves	Gallus_gallus	69	0.0379968	0.0900397
Aves	Gallus_gallus	70	0.0353609	0.0837937
Aves	Gallus_gallus	71	0.0349152	0.0827373
Aves	Gallus_gallus	72	0.0309566	0.0733568
Aves	Gallus_gallus	73	0.0317124	0.0751479
Aves	Gallus_gallus	74	0.0311988	0.0739309
Aves	Gallus_gallus	75	0.0322406	0.0763994
Aves	Gallus_gallus	76	0.0349006	0.0827029
Aves	Gallus_gallus	77	0.0348861	0.0826685
Aves	Gallus_gallus	78	0.0324828	0.0769735
Aves	Gallus_gallus	79	0.0331515	0.078558
Aves	Gallus_gallus	80	0.0340091	0.0805903
Aves	Gallus_gallus	81	0.0322212	0.0763535
Aves	Gallus_gallus	82	0.0309905	0.0734371
Aves	Gallus_gallus	83	0.0320516	0.0759516
Aves	Gallus_gallus	84	0.0345275	0.0818188
Aves	Gallus_gallus	85	0.0319353	0.0756761
Aves	Gallus_gallus	86	0.0312909	0.074149
Aves	Gallus_gallus	87	0.0287713	0.0681785
Aves	Gallus_gallus	88	0.0287471	0.0681211
Aves	Gallus_gallus	89	0.0299148	0.0708882
Aves	Gallus_gallus	90	0.0296822	0.0703371
Aves	Gallus_gallus	91	0.0283692	0.0672255
Aves	Gallus_gallus	92	0.0280785	0.0665366
Aves	Gallus_gallus	93	0.0285678	0.0676963
Aves	Gallus_gallus	94	0.0283886	0.0672715
Aves	Gallus_gallus	95	0.0278943	0.0661003
Aves	Gallus_gallus	96	0.0268817	0.0637006
Aves	Gallus_gallus	97	0.024585	0.0582583
Aves	Gallus_gallus	98	0.0246868	0.0584994
Aves	Gallus_gallus	99	0.023582	0.0558816
Aves	Gallus_gallus	100	0.036737	0.0870545
Aves	Corvus_moneduloides	1	0.0915584	0.215077
Aves	Corvus_moneduloides	2	0.0664007	0.15598
Aves	Corvus_moneduloides	3	0.0714516	0.167845
Aves	Corvus_moneduloides	4	0.0716124	0.168223
Aves	Corvus_moneduloides	5	0.0679449	0.159608
Aves	Corvus_moneduloides	6	0.0665616	0.156358
Aves	Corvus_moneduloides	7	0.0604169	0.141924
Aves	Corvus_moneduloides	8	0.0676876	0.159003
Aves	Corvus_moneduloides	9	0.064567	0.151672
Aves	Corvus_moneduloides	10	0.0636984	0.149632
Aves	Corvus_moneduloides	11	0.0647278	0.15205
Aves	Corvus_moneduloides	12	0.0666581	0.156585
Aves	Corvus_moneduloides	13	0.0655643	0.154015
Aves	Corvus_moneduloides	14	0.068717	0.161421
Aves	Corvus_moneduloides	15	0.0638592	0.15001
Aves	Corvus_moneduloides	16	0.0657251	0.154393
Aves	Corvus_moneduloides	17	0.0682345	0.160288
Aves	Corvus_moneduloides	18	0.0696178	0.163537
Aves	Corvus_moneduloides	19	0.0615107	0.144493
Aves	Corvus_moneduloides	20	0.0664007	0.15598
Aves	Corvus_moneduloides	21	0.0705508	0.165729
Aves	Corvus_moneduloides	22	0.0715802	0.168147
Aves	Corvus_moneduloides	23	0.0695535	0.163386
Aves	Corvus_moneduloides	24	0.0702934	0.165124
Aves	Corvus_moneduloides	25	0.069843	0.164066
Aves	Corvus_moneduloides	26	0.0720628	0.169281
Aves	Corvus_moneduloides	27	0.0725454	0.170414
Aves	Corvus_moneduloides	28	0.0774997	0.182052
Aves	Corvus_moneduloides	29	0.0726419	0.170641
Aves	Corvus_moneduloides	30	0.074733	0.175553
Aves	Corvus_moneduloides	31	0.0739609	0.173739
Aves	Corvus_moneduloides	32	0.072674	0.170717
Aves	Corvus_moneduloides	33	0.0696178	0.163537
Aves	Corvus_moneduloides	34	0.0697465	0.16384
Aves	Corvus_moneduloides	35	0.0693283	0.162857
Aves	Corvus_moneduloides	36	0.0667546	0.156811
Aves	Corvus_moneduloides	37	0.0679771	0.159683
Aves	Corvus_moneduloides	38	0.0667868	0.156887
Aves	Corvus_moneduloides	39	0.0714516	0.167845
Aves	Corvus_moneduloides	40	0.0667224	0.156736
Aves	Corvus_moneduloides	41	0.0696178	0.163537
Aves	Corvus_moneduloides	42	0.0711942	0.16724
Aves	Corvus_moneduloides	43	0.0710655	0.166938
Aves	Corvus_moneduloides	44	0.0670441	0.157492
Aves	Corvus_moneduloides	45	0.0698752	0.164142
Aves	Corvus_moneduloides	46	0.0721271	0.169432
Aves	Corvus_moneduloides	47	0.0733496	0.172304
Aves	Corvus_moneduloides	48	0.0744434	0.174873
Aves	Corvus_moneduloides	49	0.0744113	0.174797
Aves	Corvus_moneduloides	50	0.0722558	0.169734
Aves	Corvus_moneduloides	51	0.0709368	0.166636
Aves	Corvus_moneduloides	52	0.0693283	0.162857
Aves	Corvus_moneduloides	53	0.0681701	0.160137
Aves	Corvus_moneduloides	54	0.0601274	0.141244
Aves	Corvus_moneduloides	55	0.0588084	0.138145
Aves	Corvus_moneduloides	56	0.0569103	0.133686
Aves	Corvus_moneduloides	57	0.0567173	0.133233
Aves	Corvus_moneduloides	58	0.0598379	0.140563
Aves	Corvus_moneduloides	59	0.0590014	0.138599
Aves	Corvus_moneduloides	60	0.05572	0.13089
Aves	Corvus_moneduloides	61	0.0572964	0.134593
Aves	Corvus_moneduloides	62	0.0600309	0.141017
Aves	Corvus_moneduloides	63	0.0641809	0.150766
Aves	Corvus_moneduloides	64	0.0669476	0.157265
Aves	Corvus_moneduloides	65	0.0641488	0.15069
Aves	Corvus_moneduloides	66	0.0604813	0.142075
Aves	Corvus_moneduloides	67	0.0639236	0.150161
Aves	Corvus_moneduloides	68	0.0627011	0.147289
Aves	Corvus_moneduloides	69	0.0666581	0.156585
Aves	Corvus_moneduloides	70	0.0637305	0.149708
Aves	Corvus_moneduloides	71	0.0684597	0.160817
Aves	Corvus_moneduloides	72	0.070776	0.166258
Aves	Corvus_moneduloides	73	0.0711298	0.167089
Aves	Corvus_moneduloides	74	0.0740574	0.173966
Aves	Corvus_moneduloides	75	0.0756338	0.177669
Aves	Corvus_moneduloides	76	0.0685883	0.161119
Aves	Corvus_moneduloides	77	0.0623472	0.146458
Aves	Corvus_moneduloides	78	0.059484	0.139732
Aves	Corvus_moneduloides	79	0.0592588	0.139203
Aves	Corvus_moneduloides	80	0.0576181	0.135349
Aves	Corvus_moneduloides	81	0.0524386	0.123182
Aves	Corvus_moneduloides	82	0.0487389	0.114491
Aves	Corvus_moneduloides	83	0.049125	0.115398
Aves	Corvus_moneduloides	84	0.0498971	0.117212
Aves	Corvus_moneduloides	85	0.052342	0.122955
Aves	Corvus_moneduloides	86	0.0514413	0.120839
Aves	Corvus_moneduloides	87	0.0535967	0.125903
Aves	Corvus_moneduloides	88	0.0522134	0.122653
Aves	Corvus_moneduloides	89	0.0553661	0.130059
Aves	Corvus_moneduloides	90	0.05987	0.140639
Aves	Corvus_moneduloides	91	0.0596127	0.140034
Aves	Corvus_moneduloides	92	0.0582615	0.13686
Aves	Corvus_moneduloides	93	0.0548514	0.12885
Aves	Corvus_moneduloides	94	0.0489641	0.11502
Aves	Corvus_moneduloides	95	0.045361	0.106556
Aves	Corvus_moneduloides	96	0.0412753	0.0969585
Aves	Corvus_moneduloides	97	0.0393128	0.0923487
Aves	Corvus_moneduloides	98	0.0425299	0.0999058
Aves	Corvus_moneduloides	99	0.0428838	0.100737
Aves	Corvus_moneduloides	100	0.0606421	0.142453
Aves	Calidris_pugnax	1	0.0884676	0.208404
Aves	Calidris_pugnax	2	0.0722429	0.170183
Aves	Calidris_pugnax	3	0.0781735	0.184154
Aves	Calidris_pugnax	4	0.081738	0.192551
Aves	Calidris_pugnax	5	0.0770058	0.181404
Aves	Calidris_pugnax	6	0.0761147	0.179304
Aves	Calidris_pugnax	7	0.0689856	0.16251
Aves	Calidris_pugnax	8	0.0696309	0.164031
Aves	Calidris_pugnax	9	0.0640383	0.150856
Aves	Calidris_pugnax	10	0.0656977	0.154765
Aves	Calidris_pugnax	11	0.05989	0.141084
Aves	Calidris_pugnax	12	0.064868	0.15281
Aves	Calidris_pugnax	13	0.0626863	0.147671
Aves	Calidris_pugnax	14	0.0611806	0.144124
Aves	Calidris_pugnax	15	0.0558338	0.131528
Aves	Calidris_pugnax	16	0.0585687	0.137971
Aves	Calidris_pugnax	17	0.0564484	0.132976
Aves	Calidris_pugnax	18	0.0585994	0.138043
Aves	Calidris_pugnax	19	0.0562333	0.132469
Aves	Calidris_pugnax	20	0.0560182	0.131963
Aves	Calidris_pugnax	21	0.0560489	0.132035
Aves	Calidris_pugnax	22	0.0546969	0.12885
Aves	Calidris_pugnax	23	0.0583228	0.137392
Aves	Calidris_pugnax	24	0.0602587	0.141952
Aves	Calidris_pugnax	25	0.0596442	0.140505
Aves	Calidris_pugnax	26	0.059091	0.139202
Aves	Calidris_pugnax	27	0.0635467	0.149698
Aves	Calidris_pugnax	28	0.0647144	0.152448
Aves	Calidris_pugnax	29	0.068156	0.160556
Aves	Calidris_pugnax	30	0.0602895	0.142025
Aves	Calidris_pugnax	31	0.0616722	0.145282
Aves	Calidris_pugnax	32	0.0576468	0.135799
Aves	Calidris_pugnax	33	0.0564791	0.133049
Aves	Calidris_pugnax	34	0.0578312	0.136234
Aves	Calidris_pugnax	35	0.0580155	0.136668
Aves	Calidris_pugnax	36	0.0615186	0.14492
Aves	Calidris_pugnax	37	0.0594291	0.139998
Aves	Calidris_pugnax	38	0.0518391	0.122118
Aves	Calidris_pugnax	39	0.0538979	0.126968
Aves	Calidris_pugnax	40	0.0570322	0.134352
Aves	Calidris_pugnax	41	0.05989	0.141084
Aves	Calidris_pugnax	42	0.0551578	0.129936
Aves	Calidris_pugnax	43	0.0603816	0.142242
Aves	Calidris_pugnax	44	0.0626556	0.147599
Aves	Calidris_pugnax	45	0.0577697	0.136089
Aves	Calidris_pugnax	46	0.059214	0.139491
Aves	Calidris_pugnax	47	0.0582614	0.137247
Aves	Calidris_pugnax	48	0.0594905	0.140143
Aves	Calidris_pugnax	49	0.06453	0.152014
Aves	Calidris_pugnax	50	0.0580463	0.13674
Aves	Calidris_pugnax	51	0.0587838	0.138478
Aves	Calidris_pugnax	52	0.0582921	0.137319
Aves	Calidris_pugnax	53	0.0612728	0.144341
Aves	Calidris_pugnax	54	0.0578926	0.136378
Aves	Calidris_pugnax	55	0.0601665	0.141735
Aves	Calidris_pugnax	56	0.0582614	0.137247
Aves	Calidris_pugnax	57	0.0570322	0.134352
Aves	Calidris_pugnax	58	0.058415	0.137609
Aves	Calidris_pugnax	59	0.0513782	0.121032
Aves	Calidris_pugnax	60	0.0545432	0.128488
Aves	Calidris_pugnax	61	0.0560489	0.132035
Aves	Calidris_pugnax	62	0.0594291	0.139998
Aves	Calidris_pugnax	63	0.0580155	0.136668
Aves	Calidris_pugnax	64	0.0611806	0.144124
Aves	Calidris_pugnax	65	0.0622254	0.146585
Aves	Calidris_pugnax	66	0.0651138	0.15339
Aves	Calidris_pugnax	67	0.0573395	0.135075
Aves	Calidris_pugnax	68	0.0561718	0.132325
Aves	Calidris_pugnax	69	0.0535906	0.126244
Aves	Calidris_pugnax	70	0.0553729	0.130443
Aves	Calidris_pugnax	71	0.0546661	0.128778
Aves	Calidris_pugnax	72	0.0519927	0.12248
Aves	Calidris_pugnax	73	0.0581999	0.137102
Aves	Calidris_pugnax	74	0.0507329	0.119512
Aves	Calidris_pugnax	75	0.0449252	0.105831
Aves	Calidris_pugnax	76	0.0460007	0.108364
Aves	Calidris_pugnax	77	0.0558953	0.131673
Aves	Calidris_pugnax	78	0.0656055	0.154548
Aves	Calidris_pugnax	79	0.0724273	0.170618
Aves	Calidris_pugnax	80	0.0671727	0.158239
Aves	Calidris_pugnax	81	0.0572781	0.134931
Aves	Calidris_pugnax	82	0.0658513	0.155127
Aves	Calidris_pugnax	83	0.0661586	0.155851
Aves	Calidris_pugnax	84	0.066681	0.157081
Aves	Calidris_pugnax	85	0.0656362	0.15462
Aves	Calidris_pugnax	86	0.0570015	0.134279
Aves	Calidris_pugnax	87	0.0473527	0.111549
Aves	Calidris_pugnax	88	0.0481517	0.113432
Aves	Calidris_pugnax	89	0.043696	0.102935
Aves	Calidris_pugnax	90	0.0462465	0.108943
Aves	Calidris_pugnax	91	0.0502105	0.118281
Aves	Calidris_pugnax	92	0.0494115	0.116399
Aves	Calidris_pugnax	93	0.0529761	0.124796
Aves	Calidris_pugnax	94	0.0563562	0.132759
Aves	Calidris_pugnax	95	0.0526995	0.124145
Aves	Calidris_pugnax	96	0.0464616	0.10945
Aves	Calidris_pugnax	97	0.0443721	0.104528
Aves	Calidris_pugnax	98	0.0386873	0.0911361
Aves	Calidris_pugnax	99	0.0416987	0.0982301
Aves	Calidris_pugnax	100	0.0539594	0.127113
Aves	Geospiza_fortis	1	0.0651872	0.1567
Aves	Geospiza_fortis	2	0.0481667	0.115785
Aves	Geospiza_fortis	3	0.0465071	0.111796
Aves	Geospiza_fortis	4	0.0531455	0.127754
Aves	Geospiza_fortis	5	0.0443458	0.106601
Aves	Geospiza_fortis	6	0.0362022	0.0870246
Aves	Geospiza_fortis	7	0.0363952	0.0874885
Aves	Geospiza_fortis	8	0.0327287	0.0786747
Aves	Geospiza_fortis	9	0.0358935	0.0862824
Aves	Geospiza_fortis	10	0.0340023	0.0817363
Aves	Geospiza_fortis	11	0.0357777	0.0860041
Aves	Geospiza_fortis	12	0.036125	0.0868391
Aves	Geospiza_fortis	13	0.0351602	0.0845196
Aves	Geospiza_fortis	14	0.0386723	0.0929623
Aves	Geospiza_fortis	15	0.0402547	0.0967662
Aves	Geospiza_fortis	16	0.0380548	0.0914779
Aves	Geospiza_fortis	17	0.0349672	0.0840558
Aves	Geospiza_fortis	18	0.0345426	0.0830352
Aves	Geospiza_fortis	19	0.0371285	0.0892513
Aves	Geospiza_fortis	20	0.0405249	0.0974156
Aves	Geospiza_fortis	21	0.039753	0.0955601
Aves	Geospiza_fortis	22	0.0312621	0.0751492
Aves	Geospiza_fortis	23	0.0294095	0.0706959
Aves	Geospiza_fortis	24	0.0292165	0.070232
Aves	Geospiza_fortis	25	0.0313007	0.075242
Aves	Geospiza_fortis	26	0.0342725	0.0823858
Aves	Geospiza_fortis	27	0.0345812	0.083128
Aves	Geospiza_fortis	28	0.0349286	0.083963
Aves	Geospiza_fortis	29	0.0346584	0.0833135
Aves	Geospiza_fortis	30	0.0323041	0.0776542
Aves	Geospiza_fortis	31	0.0343497	0.0825713
Aves	Geospiza_fortis	32	0.0312621	0.0751492
Aves	Geospiza_fortis	33	0.0324585	0.0780253
Aves	Geospiza_fortis	34	0.0336936	0.0809941
Aves	Geospiza_fortis	35	0.0338865	0.081458
Aves	Geospiza_fortis	36	0.0339251	0.0815508
Aves	Geospiza_fortis	37	0.0326901	0.0785819
Aves	Geospiza_fortis	38	0.0302972	0.0728298
Aves	Geospiza_fortis	39	0.0307603	0.0739431
Aves	Geospiza_fortis	40	0.0335778	0.0807158
Aves	Geospiza_fortis	41	0.0293709	0.0706031
Aves	Geospiza_fortis	42	0.0290235	0.0697681
Aves	Geospiza_fortis	43	0.0293323	0.0705103
Aves	Geospiza_fortis	44	0.0277113	0.0666137
Aves	Geospiza_fortis	45	0.0285604	0.0686548
Aves	Geospiza_fortis	46	0.0268236	0.0644799
Aves	Geospiza_fortis	47	0.0303744	0.0730153
Aves	Geospiza_fortis	48	0.0335778	0.0807158
Aves	Geospiza_fortis	49	0.0333076	0.0800664
Aves	Geospiza_fortis	50	0.0342725	0.0823858
Aves	Geospiza_fortis	51	0.0317638	0.0763553
Aves	Geospiza_fortis	52	0.0341953	0.0822002
Aves	Geospiza_fortis	53	0.0405249	0.0974156
Aves	Geospiza_fortis	54	0.0356619	0.0857257
Aves	Geospiza_fortis	55	0.0365496	0.0878596
Aves	Geospiza_fortis	56	0.0316094	0.0759842
Aves	Geospiza_fortis	57	0.028792	0.0692115
Aves	Geospiza_fortis	58	0.0286762	0.0689331
Aves	Geospiza_fortis	59	0.0296025	0.0711598
Aves	Geospiza_fortis	60	0.031841	0.0765408
Aves	Geospiza_fortis	61	0.0305288	0.0733864
Aves	Geospiza_fortis	62	0.0318024	0.0764481
Aves	Geospiza_fortis	63	0.0312235	0.0750564
Aves	Geospiza_fortis	64	0.0311463	0.0748709
Aves	Geospiza_fortis	65	0.0311849	0.0749636
Aves	Geospiza_fortis	66	0.0305288	0.0733864
Aves	Geospiza_fortis	67	0.0301042	0.0723659
Aves	Geospiza_fortis	68	0.0292165	0.070232
Aves	Geospiza_fortis	69	0.0300656	0.0722731
Aves	Geospiza_fortis	70	0.0311077	0.0747781
Aves	Geospiza_fortis	71	0.0344655	0.0828497
Aves	Geospiza_fortis	72	0.0321883	0.0773758
Aves	Geospiza_fortis	73	0.0342339	0.082293
Aves	Geospiza_fortis	74	0.0323427	0.0777469
Aves	Geospiza_fortis	75	0.0420687	0.101127
Aves	Geospiza_fortis	76	0.0419143	0.100756
Aves	Geospiza_fortis	77	0.0374759	0.0900862
Aves	Geospiza_fortis	78	0.0290235	0.0697681
Aves	Geospiza_fortis	79	0.0297183	0.0714381
Aves	Geospiza_fortis	80	0.0267078	0.0642015
Aves	Geospiza_fortis	81	0.0249325	0.0599338
Aves	Geospiza_fortis	82	0.0327673	0.0787675
Aves	Geospiza_fortis	83	0.0290235	0.0697681
Aves	Geospiza_fortis	84	0.0282516	0.0679126
Aves	Geospiza_fortis	85	0.0310691	0.0746853
Aves	Geospiza_fortis	86	0.0272096	0.0654076
Aves	Geospiza_fortis	87	0.0267464	0.0642943
Aves	Geospiza_fortis	88	0.0306059	0.073572
Aves	Geospiza_fortis	89	0.0292551	0.0703248
Aves	Geospiza_fortis	90	0.0333076	0.0800664
Aves	Geospiza_fortis	91	0.0309919	0.0744997
Aves	Geospiza_fortis	92	0.0246623	0.0592844
Aves	Geospiza_fortis	93	0.0202239	0.048615
Aves	Geospiza_fortis	94	0.0211501	0.0508417
Aves	Geospiza_fortis	95	0.0206484	0.0496356
Aves	Geospiza_fortis	96	0.0196449	0.0472234
Aves	Geospiza_fortis	97	0.0212659	0.05112
Aves	Geospiza_fortis	98	0.0244693	0.0588205
Aves	Geospiza_fortis	99	0.0225782	0.0542744
Aves	Geospiza_fortis	100	0.0356619	0.0857257
Aves	Parus_major	1	0.0659621	0.159444
Aves	Parus_major	2	0.0566512	0.136938
Aves	Parus_major	3	0.0561798	0.135798
Aves	Parus_major	4	0.0555119	0.134184
Aves	Parus_major	5	0.0543333	0.131335
Aves	Parus_major	6	0.0591263	0.142921
Aves	Parus_major	7	0.0627799	0.151752
Aves	Parus_major	8	0.0605013	0.146244
Aves	Parus_major	9	0.0575941	0.139217
Aves	Parus_major	10	0.0562976	0.136083
Aves	Parus_major	11	0.0538226	0.130101
Aves	Parus_major	12	0.0533511	0.128961
Aves	Parus_major	13	0.0547655	0.13238
Aves	Parus_major	14	0.0568084	0.137318
Aves	Parus_major	15	0.0608942	0.147194
Aves	Parus_major	16	0.0592834	0.1433
Aves	Parus_major	17	0.0587727	0.142066
Aves	Parus_major	18	0.0502082	0.121364
Aves	Parus_major	19	0.0513868	0.124213
Aves	Parus_major	20	0.0509154	0.123073
Aves	Parus_major	21	0.0482439	0.116616
Aves	Parus_major	22	0.0485975	0.11747
Aves	Parus_major	23	0.0507975	0.122788
Aves	Parus_major	24	0.0529976	0.128106
Aves	Parus_major	25	0.0515832	0.124688
Aves	Parus_major	26	0.0539797	0.13048
Aves	Parus_major	27	0.0574369	0.138837
Aves	Parus_major	28	0.0544905	0.131715
Aves	Parus_major	29	0.0519761	0.125637
Aves	Parus_major	30	0.0432152	0.10446
Aves	Parus_major	31	0.0450224	0.108829
Aves	Parus_major	32	0.0493046	0.11918
Aves	Parus_major	33	0.0501689	0.121269
Aves	Parus_major	34	0.0477725	0.115476
Aves	Parus_major	35	0.0468689	0.113292
Aves	Parus_major	36	0.0476153	0.115096
Aves	Parus_major	37	0.0453367	0.109588
Aves	Parus_major	38	0.0445902	0.107784
Aves	Parus_major	39	0.0432545	0.104555
Aves	Parus_major	40	0.0453367	0.109588
Aves	Parus_major	41	0.0456117	0.110253
Aves	Parus_major	42	0.0441974	0.106834
Aves	Parus_major	43	0.0486368	0.117565
Aves	Parus_major	44	0.0502868	0.121554
Aves	Parus_major	45	0.0491868	0.118895
Aves	Parus_major	46	0.0478903	0.115761
Aves	Parus_major	47	0.0466331	0.112722
Aves	Parus_major	48	0.0509154	0.123073
Aves	Parus_major	49	0.0504832	0.122029
Aves	Parus_major	50	0.0471832	0.114052
Aves	Parus_major	51	0.0471439	0.113957
Aves	Parus_major	52	0.0447081	0.108069
Aves	Parus_major	53	0.047576	0.115001
Aves	Parus_major	54	0.047301	0.114337
Aves	Parus_major	55	0.0506797	0.122503
Aves	Parus_major	56	0.0549619	0.132854
Aves	Parus_major	57	0.0522904	0.126397
Aves	Parus_major	58	0.0532333	0.128676
Aves	Parus_major	59	0.0521725	0.126112
Aves	Parus_major	60	0.0497368	0.120224
Aves	Parus_major	61	0.0483618	0.116901
Aves	Parus_major	62	0.0496582	0.120034
Aves	Parus_major	63	0.0494618	0.11956
Aves	Parus_major	64	0.0474582	0.114716
Aves	Parus_major	65	0.0468689	0.113292
Aves	Parus_major	66	0.0486368	0.117565
Aves	Parus_major	67	0.0488332	0.11804
Aves	Parus_major	68	0.0493046	0.11918
Aves	Parus_major	69	0.0512297	0.123833
Aves	Parus_major	70	0.0513868	0.124213
Aves	Parus_major	71	0.0539404	0.130385
Aves	Parus_major	72	0.0521333	0.126017
Aves	Parus_major	73	0.0530761	0.128296
Aves	Parus_major	74	0.0493046	0.11918
Aves	Parus_major	75	0.0480867	0.116236
Aves	Parus_major	76	0.0469474	0.113482
Aves	Parus_major	77	0.045101	0.109019
Aves	Parus_major	78	0.0418009	0.101042
Aves	Parus_major	79	0.0420759	0.101706
Aves	Parus_major	80	0.0426259	0.103036
Aves	Parus_major	81	0.0426652	0.103131
Aves	Parus_major	82	0.0440402	0.106455
Aves	Parus_major	83	0.0405044	0.0979078
Aves	Parus_major	84	0.0413687	0.099997
Aves	Parus_major	85	0.0384615	0.0929696
Aves	Parus_major	86	0.0382258	0.0923999
Aves	Parus_major	87	0.0394044	0.0952488
Aves	Parus_major	88	0.0404259	0.0977178
Aves	Parus_major	89	0.0418402	0.101137
Aves	Parus_major	90	0.0397973	0.0961984
Aves	Parus_major	91	0.0399937	0.0966732
Aves	Parus_major	92	0.0387758	0.0937293
Aves	Parus_major	93	0.040583	0.0980977
Aves	Parus_major	94	0.0383437	0.0926847
Aves	Parus_major	95	0.0366544	0.0886013
Aves	Parus_major	96	0.0363794	0.0879366
Aves	Parus_major	97	0.03414	0.0825236
Aves	Parus_major	98	0.0340614	0.0823337
Aves	Parus_major	99	0.0301721	0.0729323
Aves	Parus_major	100	0.0406223	0.0981926
Aves	Stachyris_ruficeps	1	0.0770144	0.182758
Aves	Stachyris_ruficeps	2	0.0632555	0.150108
Aves	Stachyris_ruficeps	3	0.0643984	0.15282
Aves	Stachyris_ruficeps	4	0.0674315	0.160018
Aves	Stachyris_ruficeps	5	0.0662886	0.157306
Aves	Stachyris_ruficeps	6	0.0605301	0.143641
Aves	Stachyris_ruficeps	7	0.0607939	0.144266
Aves	Stachyris_ruficeps	8	0.0567497	0.13467
Aves	Stachyris_ruficeps	9	0.0559145	0.132688
Aves	Stachyris_ruficeps	10	0.0553431	0.131331
Aves	Stachyris_ruficeps	11	0.0525737	0.12476
Aves	Stachyris_ruficeps	12	0.0566179	0.134357
Aves	Stachyris_ruficeps	13	0.053365	0.126637
Aves	Stachyris_ruficeps	14	0.0546837	0.129767
Aves	Stachyris_ruficeps	15	0.0516946	0.122673
Aves	Stachyris_ruficeps	16	0.0527056	0.125073
Aves	Stachyris_ruficeps	17	0.0490571	0.116415
Aves	Stachyris_ruficeps	18	0.0497604	0.118084
Aves	Stachyris_ruficeps	19	0.0507715	0.120483
Aves	Stachyris_ruficeps	20	0.0538485	0.127785
Aves	Stachyris_ruficeps	21	0.0519144	0.123195
Aves	Stachyris_ruficeps	22	0.0508154	0.120587
Aves	Stachyris_ruficeps	23	0.0520023	0.123404
Aves	Stachyris_ruficeps	24	0.0482659	0.114537
Aves	Stachyris_ruficeps	25	0.0513429	0.121839
Aves	Stachyris_ruficeps	26	0.0485296	0.115163
Aves	Stachyris_ruficeps	27	0.0445294	0.10567
Aves	Stachyris_ruficeps	28	0.0442657	0.105044
Aves	Stachyris_ruficeps	29	0.0421117	0.0999329
Aves	Stachyris_ruficeps	30	0.0483538	0.114746
Aves	Stachyris_ruficeps	31	0.0536287	0.127263
Aves	Stachyris_ruficeps	32	0.0527056	0.125073
Aves	Stachyris_ruficeps	33	0.0469911	0.111512
Aves	Stachyris_ruficeps	34	0.0430788	0.102228
Aves	Stachyris_ruficeps	35	0.0435184	0.103271
Aves	Stachyris_ruficeps	36	0.0431228	0.102332
Aves	Stachyris_ruficeps	37	0.0415842	0.0986812
Aves	Stachyris_ruficeps	38	0.0404413	0.095969
Aves	Stachyris_ruficeps	39	0.0363532	0.0862678
Aves	Stachyris_ruficeps	40	0.0395182	0.0937784
Aves	Stachyris_ruficeps	41	0.0426392	0.101185
Aves	Stachyris_ruficeps	42	0.0452767	0.107444
Aves	Stachyris_ruficeps	43	0.0443096	0.105149
Aves	Stachyris_ruficeps	44	0.0475186	0.112764
Aves	Stachyris_ruficeps	45	0.0419359	0.0995157
Aves	Stachyris_ruficeps	46	0.0419359	0.0995157
Aves	Stachyris_ruficeps	47	0.0432986	0.102749
Aves	Stachyris_ruficeps	48	0.0488813	0.115997
Aves	Stachyris_ruficeps	49	0.0521342	0.123717
Aves	Stachyris_ruficeps	50	0.0523979	0.124342
Aves	Stachyris_ruficeps	51	0.0499363	0.118501
Aves	Stachyris_ruficeps	52	0.0482219	0.114433
Aves	Stachyris_ruficeps	53	0.0469471	0.111407
Aves	Stachyris_ruficeps	54	0.0422876	0.10035
Aves	Stachyris_ruficeps	55	0.0450569	0.106922
Aves	Stachyris_ruficeps	56	0.0438261	0.104001
Aves	Stachyris_ruficeps	57	0.0467273	0.110886
Aves	Stachyris_ruficeps	58	0.044969	0.106713
Aves	Stachyris_ruficeps	59	0.047035	0.111616
Aves	Stachyris_ruficeps	60	0.0463757	0.110051
Aves	Stachyris_ruficeps	61	0.0498483	0.118292
Aves	Stachyris_ruficeps	62	0.0487494	0.115684
Aves	Stachyris_ruficeps	63	0.0435184	0.103271
Aves	Stachyris_ruficeps	64	0.0415403	0.0985769
Aves	Stachyris_ruficeps	65	0.0472548	0.112138
Aves	Stachyris_ruficeps	66	0.0489252	0.116102
Aves	Stachyris_ruficeps	67	0.0472548	0.112138
Aves	Stachyris_ruficeps	68	0.0440459	0.104523
Aves	Stachyris_ruficeps	69	0.0443976	0.105357
Aves	Stachyris_ruficeps	70	0.0400897	0.0951345
Aves	Stachyris_ruficeps	71	0.0400018	0.0949259
Aves	Stachyris_ruficeps	72	0.0426832	0.101289
Aves	Stachyris_ruficeps	73	0.0432107	0.102541
Aves	Stachyris_ruficeps	74	0.0458482	0.1088
Aves	Stachyris_ruficeps	75	0.0431667	0.102436
Aves	Stachyris_ruficeps	76	0.0457603	0.108591
Aves	Stachyris_ruficeps	77	0.0458042	0.108695
Aves	Stachyris_ruficeps	78	0.046068	0.109321
Aves	Stachyris_ruficeps	79	0.0491011	0.116519
Aves	Stachyris_ruficeps	80	0.0578487	0.137277
Aves	Stachyris_ruficeps	81	0.0578487	0.137277
Aves	Stachyris_ruficeps	82	0.0536727	0.127368
Aves	Stachyris_ruficeps	83	0.0504638	0.119753
Aves	Stachyris_ruficeps	84	0.0420238	0.0997243
Aves	Stachyris_ruficeps	85	0.0414084	0.0982639
Aves	Stachyris_ruficeps	86	0.0379797	0.0901274
Aves	Stachyris_ruficeps	87	0.0352543	0.0836599
Aves	Stachyris_ruficeps	88	0.0345949	0.0820952
Aves	Stachyris_ruficeps	89	0.0338476	0.0803219
Aves	Stachyris_ruficeps	90	0.0339356	0.0805305
Aves	Stachyris_ruficeps	91	0.0341114	0.0809478
Aves	Stachyris_ruficeps	92	0.0316058	0.0750019
Aves	Stachyris_ruficeps	93	0.0302431	0.0717681
Aves	Stachyris_ruficeps	94	0.0322212	0.0764623
Aves	Stachyris_ruficeps	95	0.0291881	0.0692646
Aves	Stachyris_ruficeps	96	0.0263748	0.0625885
Aves	Stachyris_ruficeps	97	0.0226384	0.0537218
Aves	Stachyris_ruficeps	98	0.0242648	0.0575814
Aves	Stachyris_ruficeps	99	0.0229461	0.054452
Aves	Stachyris_ruficeps	100	0.0354741	0.0841815
Aves	Cairina_moschata	1	0.106318	0.25656
Aves	Cairina_moschata	2	0.0806191	0.194544
Aves	Cairina_moschata	3	0.0853873	0.20605
Aves	Cairina_moschata	4	0.0865121	0.208765
Aves	Cairina_moschata	5	0.0856563	0.2067
Aves	Cairina_moschata	6	0.080937	0.195311
Aves	Cairina_moschata	7	0.0745305	0.179852
Aves	Cairina_moschata	8	0.0765112	0.184631
Aves	Cairina_moschata	9	0.0767801	0.18528
Aves	Cairina_moschata	10	0.0775137	0.18705
Aves	Cairina_moschata	11	0.075582	0.182389
Aves	Cairina_moschata	12	0.0712784	0.172004
Aves	Cairina_moschata	13	0.070447	0.169998
Aves	Cairina_moschata	14	0.0726232	0.175249
Aves	Cairina_moschata	15	0.0718163	0.173302
Aves	Cairina_moschata	16	0.0746283	0.180088
Aves	Cairina_moschata	17	0.0780027	0.188231
Aves	Cairina_moschata	18	0.0832355	0.200858
Aves	Cairina_moschata	19	0.0802034	0.193541
Aves	Cairina_moschata	20	0.0752641	0.181622
Aves	Cairina_moschata	21	0.0707649	0.170765
Aves	Cairina_moschata	22	0.0721831	0.174187
Aves	Cairina_moschata	23	0.0694444	0.167578
Aves	Cairina_moschata	24	0.0682463	0.164687
Aves	Cairina_moschata	25	0.0664613	0.16038
Aves	Cairina_moschata	26	0.0674638	0.162799
Aves	Cairina_moschata	27	0.0736258	0.177668
Aves	Cairina_moschata	28	0.0765356	0.18469
Aves	Cairina_moschata	29	0.0775137	0.18705
Aves	Cairina_moschata	30	0.0720608	0.173892
Aves	Cairina_moschata	31	0.0738214	0.17814
Aves	Cairina_moschata	32	0.075044	0.181091
Aves	Cairina_moschata	33	0.0716941	0.173007
Aves	Cairina_moschata	34	0.072721	0.175485
Aves	Cairina_moschata	35	0.0699824	0.168876
Aves	Cairina_moschata	36	0.0728922	0.175898
Aves	Cairina_moschata	37	0.0714984	0.172535
Aves	Cairina_moschata	38	0.0720608	0.173892
Aves	Cairina_moschata	39	0.0719386	0.173597
Aves	Cairina_moschata	40	0.0731123	0.176429
Aves	Cairina_moschata	41	0.0769024	0.185575
Aves	Cairina_moschata	42	0.0748239	0.18056
Aves	Cairina_moschata	43	0.069151	0.16687
Aves	Cairina_moschata	44	0.0746772	0.180206
Aves	Cairina_moschata	45	0.0720608	0.173892
Aves	Cairina_moschata	46	0.0709849	0.171296
Aves	Cairina_moschata	47	0.0713028	0.172063
Aves	Cairina_moschata	48	0.0708138	0.170883
Aves	Cairina_moschata	49	0.0697623	0.168345
Aves	Cairina_moschata	50	0.0696401	0.16805
Aves	Cairina_moschata	51	0.0702025	0.169407
Aves	Cairina_moschata	52	0.0749707	0.180914
Aves	Cairina_moschata	53	0.0715229	0.172594
Aves	Cairina_moschata	54	0.0740904	0.17879
Aves	Cairina_moschata	55	0.0756553	0.182566
Aves	Cairina_moschata	56	0.0757531	0.182802
Aves	Cairina_moschata	57	0.0747995	0.180501
Aves	Cairina_moschata	58	0.0725988	0.17519
Aves	Cairina_moschata	59	0.0693466	0.167342
Aves	Cairina_moschata	60	0.0705203	0.170175
Aves	Cairina_moschata	61	0.0733079	0.176901
Aves	Cairina_moschata	62	0.0719386	0.173597
Aves	Cairina_moschata	63	0.0693466	0.167342
Aves	Cairina_moschata	64	0.0699824	0.168876
Aves	Cairina_moschata	65	0.0705448	0.170234
Aves	Cairina_moschata	66	0.0752641	0.181622
Aves	Cairina_moschata	67	0.0748728	0.180678
Aves	Cairina_moschata	68	0.0778071	0.187758
Aves	Cairina_moschata	69	0.0782962	0.188939
Aves	Cairina_moschata	70	0.0759243	0.183215
Aves	Cairina_moschata	71	0.0734546	0.177255
Aves	Cairina_moschata	72	0.0765845	0.184808
Aves	Cairina_moschata	73	0.075582	0.182389
Aves	Cairina_moschata	74	0.0693711	0.167401
Aves	Cairina_moschata	75	0.0696401	0.16805
Aves	Cairina_moschata	76	0.0740415	0.178672
Aves	Cairina_moschata	77	0.0721831	0.174187
Aves	Cairina_moschata	78	0.0706426	0.17047
Aves	Cairina_moschata	79	0.0724765	0.174895
Aves	Cairina_moschata	80	0.0745061	0.179793
Aves	Cairina_moschata	81	0.0702269	0.169466
Aves	Cairina_moschata	82	0.074286	0.179262
Aves	Cairina_moschata	83	0.0730145	0.176193
Aves	Cairina_moschata	84	0.0707893	0.170824
Aves	Cairina_moschata	85	0.0761688	0.183805
Aves	Cairina_moschata	86	0.0717185	0.173066
Aves	Cairina_moschata	87	0.0730878	0.17637
Aves	Cairina_moschata	88	0.069909	0.168699
Aves	Cairina_moschata	89	0.069689	0.168168
Aves	Cairina_moschata	90	0.06607	0.159435
Aves	Cairina_moschata	91	0.0652631	0.157488
Aves	Cairina_moschata	92	0.0626467	0.151175
Aves	Cairina_moschata	93	0.0571694	0.137957
Aves	Cairina_moschata	94	0.0587344	0.141733
Aves	Cairina_moschata	95	0.0616197	0.148696
Aves	Cairina_moschata	96	0.0601526	0.145156
Aves	Cairina_moschata	97	0.0596146	0.143858
Aves	Cairina_moschata	98	0.0569004	0.137308
Aves	Cairina_moschata	99	0.0506162	0.122143
Aves	Cairina_moschata	100	0.077367	0.186696
Aves	Zonotrichia_albicollis	1	0.0457966	0.1103
Aves	Zonotrichia_albicollis	2	0.0326108	0.0785424
Aves	Zonotrichia_albicollis	3	0.0328681	0.079162
Aves	Zonotrichia_albicollis	4	0.0323535	0.0779227
Aves	Zonotrichia_albicollis	5	0.0353123	0.0850488
Aves	Zonotrichia_albicollis	6	0.0336399	0.081021
Aves	Zonotrichia_albicollis	7	0.0351836	0.084739
Aves	Zonotrichia_albicollis	8	0.0329324	0.079317
Aves	Zonotrichia_albicollis	9	0.031646	0.0762186
Aves	Zonotrichia_albicollis	10	0.0265003	0.0638254
Aves	Zonotrichia_albicollis	11	0.0274008	0.0659942
Aves	Zonotrichia_albicollis	12	0.0299093	0.0720359
Aves	Zonotrichia_albicollis	13	0.0297163	0.0715712
Aves	Zonotrichia_albicollis	14	0.0311314	0.0749793
Aves	Zonotrichia_albicollis	15	0.0353766	0.0852038
Aves	Zonotrichia_albicollis	16	0.0338329	0.0814858
Aves	Zonotrichia_albicollis	17	0.0347334	0.0836546
Aves	Zonotrichia_albicollis	18	0.0337043	0.0811759
Aves	Zonotrichia_albicollis	19	0.0317746	0.0765285
Aves	Zonotrichia_albicollis	20	0.0313887	0.075599
Aves	Zonotrichia_albicollis	21	0.0293304	0.0706417
Aves	Zonotrichia_albicollis	22	0.0300379	0.0723457
Aves	Zonotrichia_albicollis	23	0.0291375	0.0701769
Aves	Zonotrichia_albicollis	24	0.0303596	0.0731203
Aves	Zonotrichia_albicollis	25	0.029652	0.0714162
Aves	Zonotrichia_albicollis	26	0.0295877	0.0712613
Aves	Zonotrichia_albicollis	27	0.0261144	0.0628959
Aves	Zonotrichia_albicollis	28	0.0283013	0.068163
Aves	Zonotrichia_albicollis	29	0.0301023	0.0725007
Aves	Zonotrichia_albicollis	30	0.0321605	0.077458
Aves	Zonotrichia_albicollis	31	0.0319033	0.0768383
Aves	Zonotrichia_albicollis	32	0.0255355	0.0615016
Aves	Zonotrichia_albicollis	33	0.026243	0.0632057
Aves	Zonotrichia_albicollis	34	0.0290731	0.070022
Aves	Zonotrichia_albicollis	35	0.0268219	0.0645999
Aves	Zonotrichia_albicollis	36	0.0257284	0.0619664
Aves	Zonotrichia_albicollis	37	0.0253425	0.0610369
Aves	Zonotrichia_albicollis	38	0.0218692	0.0526714
Aves	Zonotrichia_albicollis	39	0.0247636	0.0596426
Aves	Zonotrichia_albicollis	40	0.0232199	0.0559246
Aves	Zonotrichia_albicollis	41	0.0219335	0.0528263
Aves	Zonotrichia_albicollis	42	0.0248279	0.0597975
Aves	Zonotrichia_albicollis	43	0.0242491	0.0584033
Aves	Zonotrichia_albicollis	44	0.0261144	0.0628959
Aves	Zonotrichia_albicollis	45	0.0266933	0.0642901
Aves	Zonotrichia_albicollis	46	0.0274008	0.0659942
Aves	Zonotrichia_albicollis	47	0.0305525	0.0735851
Aves	Zonotrichia_albicollis	48	0.0286229	0.0689376
Aves	Zonotrichia_albicollis	49	0.0265646	0.0639803
Aves	Zonotrichia_albicollis	50	0.024442	0.0588681
Aves	Zonotrichia_albicollis	51	0.027851	0.0670786
Aves	Zonotrichia_albicollis	52	0.0343475	0.0827251
Aves	Zonotrichia_albicollis	53	0.0326751	0.0786973
Aves	Zonotrichia_albicollis	54	0.0255355	0.0615016
Aves	Zonotrichia_albicollis	55	0.0227697	0.0548402
Aves	Zonotrichia_albicollis	56	0.0255998	0.0616565
Aves	Zonotrichia_albicollis	57	0.0300379	0.0723457
Aves	Zonotrichia_albicollis	58	0.0310028	0.0746695
Aves	Zonotrichia_albicollis	59	0.0254712	0.0613467
Aves	Zonotrichia_albicollis	60	0.0230913	0.0556148
Aves	Zonotrichia_albicollis	61	0.0267576	0.064445
Aves	Zonotrichia_albicollis	62	0.0288802	0.0695572
Aves	Zonotrichia_albicollis	63	0.0266289	0.0641352
Aves	Zonotrichia_albicollis	64	0.0315173	0.0759088
Aves	Zonotrichia_albicollis	65	0.0300379	0.0723457
Aves	Zonotrichia_albicollis	66	0.0302309	0.0728105
Aves	Zonotrichia_albicollis	67	0.0313887	0.075599
Aves	Zonotrichia_albicollis	68	0.0277867	0.0669237
Aves	Zonotrichia_albicollis	69	0.0295877	0.0712613
Aves	Zonotrichia_albicollis	70	0.0327394	0.0788522
Aves	Zonotrichia_albicollis	71	0.0345404	0.0831899
Aves	Zonotrichia_albicollis	72	0.0373706	0.0900062
Aves	Zonotrichia_albicollis	73	0.038657	0.0931045
Aves	Zonotrichia_albicollis	74	0.0360841	0.0869078
Aves	Zonotrichia_albicollis	75	0.0356982	0.0859783
Aves	Zonotrichia_albicollis	76	0.0304239	0.0732752
Aves	Zonotrichia_albicollis	77	0.0320962	0.077303
Aves	Zonotrichia_albicollis	78	0.0270792	0.0652196
Aves	Zonotrichia_albicollis	79	0.0268219	0.0645999
Aves	Zonotrichia_albicollis	80	0.0297163	0.0715712
Aves	Zonotrichia_albicollis	81	0.0286872	0.0690925
Aves	Zonotrichia_albicollis	82	0.0250852	0.0604172
Aves	Zonotrichia_albicollis	83	0.0288158	0.0694023
Aves	Zonotrichia_albicollis	84	0.0289445	0.0697122
Aves	Zonotrichia_albicollis	85	0.0333183	0.0802464
Aves	Zonotrichia_albicollis	86	0.0375635	0.0904709
Aves	Zonotrichia_albicollis	87	0.0304239	0.0732752
Aves	Zonotrichia_albicollis	88	0.0275294	0.066304
Aves	Zonotrichia_albicollis	89	0.026436	0.0636704
Aves	Zonotrichia_albicollis	90	0.0288158	0.0694023
Aves	Zonotrichia_albicollis	91	0.0248279	0.0597975
Aves	Zonotrichia_albicollis	92	0.024442	0.0588681
Aves	Zonotrichia_albicollis	93	0.0245063	0.059023
Aves	Zonotrichia_albicollis	94	0.0225124	0.0542206
Aves	Zonotrichia_albicollis	95	0.0203255	0.0489534
Aves	Zonotrichia_albicollis	96	0.0204541	0.0492633
Aves	Zonotrichia_albicollis	97	0.0209044	0.0503477
Aves	Zonotrichia_albicollis	98	0.0185245	0.0446158
Aves	Zonotrichia_albicollis	99	0.0187818	0.0452354
Aves	Zonotrichia_albicollis	100	0.0255355	0.0615016
Aves	Catharus_ustulatus	1	0.065159	0.153387
Aves	Catharus_ustulatus	2	0.032169	0.0757274
Aves	Catharus_ustulatus	3	0.0351545	0.0827554
Aves	Catharus_ustulatus	4	0.0329154	0.0774844
Aves	Catharus_ustulatus	5	0.0304523	0.0716862
Aves	Catharus_ustulatus	6	0.0282878	0.0665909
Aves	Catharus_ustulatus	7	0.0293327	0.0690507
Aves	Catharus_ustulatus	8	0.0293327	0.0690507
Aves	Catharus_ustulatus	9	0.0264965	0.062374
Aves	Catharus_ustulatus	10	0.0263472	0.0620226
Aves	Catharus_ustulatus	11	0.0272429	0.0641311
Aves	Catharus_ustulatus	12	0.027019	0.063604
Aves	Catharus_ustulatus	13	0.0247798	0.0583329
Aves	Catharus_ustulatus	14	0.0255262	0.0600899
Aves	Catharus_ustulatus	15	0.0327661	0.077133
Aves	Catharus_ustulatus	16	0.0355277	0.0836339
Aves	Catharus_ustulatus	17	0.0347813	0.0818769
Aves	Catharus_ustulatus	18	0.0339603	0.0799442
Aves	Catharus_ustulatus	19	0.0364233	0.0857423
Aves	Catharus_ustulatus	20	0.0367965	0.0866208
Aves	Catharus_ustulatus	21	0.0324675	0.0764302
Aves	Catharus_ustulatus	22	0.033811	0.0795928
Aves	Catharus_ustulatus	23	0.029482	0.0694021
Aves	Catharus_ustulatus	24	0.0250784	0.0590357
Aves	Catharus_ustulatus	25	0.0255262	0.0600899
Aves	Catharus_ustulatus	26	0.0285864	0.0672937
Aves	Catharus_ustulatus	27	0.0316465	0.0744974
Aves	Catharus_ustulatus	28	0.03299	0.0776601
Aves	Catharus_ustulatus	29	0.0361248	0.0850395
Aves	Catharus_ustulatus	30	0.0335125	0.07889
Aves	Catharus_ustulatus	31	0.0315719	0.0743217
Aves	Catharus_ustulatus	32	0.0315719	0.0743217
Aves	Catharus_ustulatus	33	0.0300791	0.0708077
Aves	Catharus_ustulatus	34	0.0273921	0.0644825
Aves	Catharus_ustulatus	35	0.0228392	0.0537647
Aves	Catharus_ustulatus	36	0.0226153	0.0532376
Aves	Catharus_ustulatus	37	0.0236602	0.0556974
Aves	Catharus_ustulatus	38	0.0274668	0.0646582
Aves	Catharus_ustulatus	39	0.0324675	0.0764302
Aves	Catharus_ustulatus	40	0.0340349	0.0801199
Aves	Catharus_ustulatus	41	0.0310494	0.0730918
Aves	Catharus_ustulatus	42	0.0291088	0.0685236
Aves	Catharus_ustulatus	43	0.0282878	0.0665909
Aves	Catharus_ustulatus	44	0.028661	0.0674694
Aves	Catharus_ustulatus	45	0.0298552	0.0702806
Aves	Catharus_ustulatus	46	0.0296313	0.0697535
Aves	Catharus_ustulatus	47	0.032169	0.0757274
Aves	Catharus_ustulatus	48	0.0322436	0.0759031
Aves	Catharus_ustulatus	49	0.0327661	0.077133
Aves	Catharus_ustulatus	50	0.0314972	0.074146
Aves	Catharus_ustulatus	51	0.0279146	0.0657124
Aves	Catharus_ustulatus	52	0.0341096	0.0802956
Aves	Catharus_ustulatus	53	0.0289595	0.0681722
Aves	Catharus_ustulatus	54	0.0303777	0.0715105
Aves	Catharus_ustulatus	55	0.0288849	0.0679965
Aves	Catharus_ustulatus	56	0.0248545	0.0585086
Aves	Catharus_ustulatus	57	0.0239588	0.0564002
Aves	Catharus_ustulatus	58	0.0272429	0.0641311
Aves	Catharus_ustulatus	59	0.0292581	0.068875
Aves	Catharus_ustulatus	60	0.0333632	0.0785386
Aves	Catharus_ustulatus	61	0.0333632	0.0785386
Aves	Catharus_ustulatus	62	0.0347067	0.0817012
Aves	Catharus_ustulatus	63	0.0311987	0.0734432
Aves	Catharus_ustulatus	64	0.031348	0.0737946
Aves	Catharus_ustulatus	65	0.0325422	0.0766059
Aves	Catharus_ustulatus	66	0.0353784	0.0832825
Aves	Catharus_ustulatus	67	0.0347067	0.0817012
Aves	Catharus_ustulatus	68	0.032169	0.0757274
Aves	Catharus_ustulatus	69	0.0337364	0.0794171
Aves	Catharus_ustulatus	70	0.0317212	0.0746731
Aves	Catharus_ustulatus	71	0.0318704	0.0750245
Aves	Catharus_ustulatus	72	0.0347067	0.0817012
Aves	Catharus_ustulatus	73	0.0312733	0.0736189
Aves	Catharus_ustulatus	74	0.0265711	0.0625497
Aves	Catharus_ustulatus	75	0.0235856	0.0555217
Aves	Catharus_ustulatus	76	0.0220928	0.0520076
Aves	Catharus_ustulatus	77	0.0196298	0.0462095
Aves	Catharus_ustulatus	78	0.0207494	0.048845
Aves	Catharus_ustulatus	79	0.0203015	0.0477908
Aves	Catharus_ustulatus	80	0.022466	0.0528862
Aves	Catharus_ustulatus	81	0.0376922	0.0887293
Aves	Catharus_ustulatus	82	0.0382893	0.0901349
Aves	Catharus_ustulatus	83	0.039185	0.0922433
Aves	Catharus_ustulatus	84	0.0368712	0.0867966
Aves	Catharus_ustulatus	85	0.0363487	0.0855666
Aves	Catharus_ustulatus	86	0.0198537	0.0467366
Aves	Catharus_ustulatus	87	0.021645	0.0509534
Aves	Catharus_ustulatus	88	0.0214211	0.0504263
Aves	Catharus_ustulatus	89	0.0232871	0.0548189
Aves	Catharus_ustulatus	90	0.0288103	0.0678208
Aves	Catharus_ustulatus	91	0.0271682	0.0639554
Aves	Catharus_ustulatus	92	0.0316465	0.0744974
Aves	Catharus_ustulatus	93	0.0289595	0.0681722
Aves	Catharus_ustulatus	94	0.025153	0.0592114
Aves	Catharus_ustulatus	95	0.0255262	0.0600899
Aves	Catharus_ustulatus	96	0.0202269	0.0476151
Aves	Catharus_ustulatus	97	0.0180624	0.0425198
Aves	Catharus_ustulatus	98	0.0185849	0.0437497
Aves	Catharus_ustulatus	99	0.0188834	0.0444525
Aves	Catharus_ustulatus	100	0.0263472	0.0620226
Aves	Athene_cunicularia	1	0.0635905	0.155402
Aves	Athene_cunicularia	2	0.0344193	0.0841136
Aves	Athene_cunicularia	3	0.0385428	0.0941906
Aves	Athene_cunicularia	4	0.0444043	0.108515
Aves	Athene_cunicularia	5	0.0392585	0.0959395
Aves	Athene_cunicularia	6	0.0347942	0.0850297
Aves	Athene_cunicularia	7	0.0343171	0.0838638
Aves	Athene_cunicularia	8	0.0334651	0.0817818
Aves	Athene_cunicularia	9	0.0348623	0.0851963
Aves	Athene_cunicularia	10	0.0385769	0.0942739
Aves	Athene_cunicularia	11	0.0354076	0.0865288
Aves	Athene_cunicularia	12	0.0324087	0.0792001
Aves	Athene_cunicularia	13	0.0344193	0.0841136
Aves	Athene_cunicularia	14	0.038202	0.0933578
Aves	Athene_cunicularia	15	0.0391562	0.0956897
Aves	Athene_cunicularia	16	0.0379635	0.0927748
Aves	Athene_cunicularia	17	0.0356121	0.0870285
Aves	Athene_cunicularia	18	0.030364	0.0742032
Aves	Athene_cunicularia	19	0.0363959	0.0889439
Aves	Athene_cunicularia	20	0.0341467	0.0834474
Aves	Athene_cunicularia	21	0.0317953	0.077701
Aves	Athene_cunicularia	22	0.0321701	0.0786171
Aves	Athene_cunicularia	23	0.0265472	0.0648758
Aves	Athene_cunicularia	24	0.0258997	0.0632934
Aves	Athene_cunicularia	25	0.0271606	0.0663748
Aves	Athene_cunicularia	26	0.0305344	0.0746196
Aves	Athene_cunicularia	27	0.0313863	0.0767016
Aves	Athene_cunicularia	28	0.0379635	0.0927748
Aves	Athene_cunicularia	29	0.035578	0.0869452
Aves	Athene_cunicularia	30	0.0344875	0.0842802
Aves	Athene_cunicularia	31	0.0328517	0.0802827
Aves	Athene_cunicularia	32	0.0337718	0.0825313
Aves	Athene_cunicularia	33	0.0355439	0.0868619
Aves	Athene_cunicularia	34	0.0351009	0.0857793
Aves	Athene_cunicularia	35	0.0392585	0.0959395
Aves	Athene_cunicularia	36	0.0351009	0.0857793
Aves	Athene_cunicularia	37	0.0327154	0.0799496
Aves	Athene_cunicularia	38	0.0312841	0.0764518
Aves	Athene_cunicularia	39	0.0343171	0.0838638
Aves	Athene_cunicularia	40	0.0290349	0.0709553
Aves	Athene_cunicularia	41	0.025627	0.0626272
Aves	Athene_cunicularia	42	0.0296483	0.0724543
Aves	Athene_cunicularia	43	0.0306366	0.0748695
Aves	Athene_cunicularia	44	0.0284556	0.0695395
Aves	Athene_cunicularia	45	0.0302276	0.0738701
Aves	Athene_cunicularia	46	0.0306025	0.0747862
Aves	Athene_cunicularia	47	0.0311478	0.0761187
Aves	Athene_cunicularia	48	0.0279103	0.068207
Aves	Athene_cunicularia	49	0.0293075	0.0716215
Aves	Athene_cunicularia	50	0.0354076	0.0865288
Aves	Athene_cunicularia	51	0.0343171	0.0838638
Aves	Athene_cunicularia	52	0.0332266	0.0811988
Aves	Athene_cunicularia	53	0.035135	0.0858625
Aves	Athene_cunicularia	54	0.0333288	0.0814487
Aves	Athene_cunicularia	55	0.0324427	0.0792834
Aves	Athene_cunicularia	56	0.0302958	0.0740367
Aves	Athene_cunicularia	57	0.0317612	0.0776177
Aves	Athene_cunicularia	58	0.0331925	0.0811155
Aves	Athene_cunicularia	59	0.039054	0.0954398
Aves	Athene_cunicularia	60	0.0360891	0.0881944
Aves	Athene_cunicularia	61	0.0330562	0.0807824
Aves	Athene_cunicularia	62	0.0320679	0.0783673
Aves	Athene_cunicularia	63	0.0298187	0.0728707
Aves	Athene_cunicularia	64	0.0295461	0.0722045
Aves	Athene_cunicularia	65	0.0236164	0.0577136
Aves	Athene_cunicularia	66	0.0224918	0.0549653
Aves	Athene_cunicularia	67	0.0258656	0.0632102
Aves	Athene_cunicularia	68	0.0326131	0.0796998
Aves	Athene_cunicularia	69	0.0356461	0.0871118
Aves	Athene_cunicularia	70	0.0440635	0.107682
Aves	Athene_cunicularia	71	0.0408601	0.0998537
Aves	Athene_cunicularia	72	0.0339422	0.0829477
Aves	Athene_cunicularia	73	0.0292053	0.0713717
Aves	Athene_cunicularia	74	0.0274332	0.0670411
Aves	Athene_cunicularia	75	0.0272628	0.0666247
Aves	Athene_cunicularia	76	0.0299891	0.0732871
Aves	Athene_cunicularia	77	0.0312159	0.0762852
Aves	Athene_cunicularia	78	0.0281489	0.06879
Aves	Athene_cunicularia	79	0.0262405	0.0641262
Aves	Athene_cunicularia	80	0.0256952	0.0627937
Aves	Athene_cunicularia	81	0.0268198	0.065542
Aves	Athene_cunicularia	82	0.025593	0.0625439
Aves	Athene_cunicularia	83	0.0249796	0.0610449
Aves	Athene_cunicularia	84	0.0249114	0.0608783
Aves	Athene_cunicularia	85	0.0222874	0.0544657
Aves	Athene_cunicularia	86	0.0205153	0.0501351
Aves	Athene_cunicularia	87	0.0193225	0.0472202
Aves	Athene_cunicularia	88	0.0230371	0.0562978
Aves	Athene_cunicularia	89	0.0225259	0.0550486
Aves	Athene_cunicularia	90	0.0183342	0.0448051
Aves	Athene_cunicularia	91	0.0214354	0.0523836
Aves	Athene_cunicularia	92	0.0215717	0.0527168
Aves	Athene_cunicularia	93	0.0199019	0.048636
Aves	Athene_cunicularia	94	0.0173119	0.0423067
Aves	Athene_cunicularia	95	0.0163236	0.0398915
Aves	Athene_cunicularia	96	0.0152672	0.0373098
Aves	Athene_cunicularia	97	0.013461	0.0328959
Aves	Athene_cunicularia	98	0.0149264	0.036477
Aves	Athene_cunicularia	99	0.0154716	0.0378095
Aves	Athene_cunicularia	100	0.0298187	0.0728707
Aves	Anas_platyrhynchos	1	0.0573067	0.138355
Aves	Anas_platyrhynchos	2	0.0369236	0.0891444
Aves	Anas_platyrhynchos	3	0.0388728	0.0938503
Aves	Anas_platyrhynchos	4	0.0388728	0.0938503
Aves	Anas_platyrhynchos	5	0.0397639	0.0960016
Aves	Anas_platyrhynchos	6	0.0379817	0.091699
Aves	Anas_platyrhynchos	7	0.0336378	0.0812114
Aves	Anas_platyrhynchos	8	0.0353085	0.0852451
Aves	Anas_platyrhynchos	9	0.0388171	0.0937159
Aves	Anas_platyrhynchos	10	0.0430497	0.103935
Aves	Anas_platyrhynchos	11	0.0478392	0.115498
Aves	Anas_platyrhynchos	12	0.0497884	0.120204
Aves	Anas_platyrhynchos	13	0.0426598	0.102993
Aves	Anas_platyrhynchos	14	0.0405992	0.0980185
Aves	Anas_platyrhynchos	15	0.0432168	0.104338
Aves	Anas_platyrhynchos	16	0.0454444	0.109716
Aves	Anas_platyrhynchos	17	0.0436066	0.105279
Aves	Anas_platyrhynchos	18	0.0419358	0.101245
Aves	Anas_platyrhynchos	19	0.0441635	0.106624
Aves	Anas_platyrhynchos	20	0.0495656	0.119666
Aves	Anas_platyrhynchos	21	0.0451103	0.108909
Aves	Anas_platyrhynchos	22	0.0445534	0.107565
Aves	Anas_platyrhynchos	23	0.0427155	0.103128
Aves	Anas_platyrhynchos	24	0.0451103	0.108909
Aves	Anas_platyrhynchos	25	0.0423257	0.102187
Aves	Anas_platyrhynchos	26	0.0413232	0.0997664
Aves	Anas_platyrhynchos	27	0.03865	0.0933125
Aves	Anas_platyrhynchos	28	0.0402651	0.0972117
Aves	Anas_platyrhynchos	29	0.0401537	0.0969428
Aves	Anas_platyrhynchos	30	0.0392626	0.0947915
Aves	Anas_platyrhynchos	31	0.0398753	0.0962705
Aves	Anas_platyrhynchos	32	0.0381488	0.0921024
Aves	Anas_platyrhynchos	33	0.0383716	0.0926402
Aves	Anas_platyrhynchos	34	0.0390399	0.0942537
Aves	Anas_platyrhynchos	35	0.0388728	0.0938503
Aves	Anas_platyrhynchos	36	0.0370907	0.0895477
Aves	Anas_platyrhynchos	37	0.035587	0.0859174
Aves	Anas_platyrhynchos	38	0.0358098	0.0864552
Aves	Anas_platyrhynchos	39	0.0331922	0.0801358
Aves	Anas_platyrhynchos	40	0.0350858	0.0847073
Aves	Anas_platyrhynchos	41	0.0339719	0.0820182
Aves	Anas_platyrhynchos	42	0.0348073	0.084035
Aves	Anas_platyrhynchos	43	0.0412119	0.0994975
Aves	Anas_platyrhynchos	44	0.0414346	0.100035
Aves	Anas_platyrhynchos	45	0.040822	0.0985563
Aves	Anas_platyrhynchos	46	0.0404879	0.0977495
Aves	Anas_platyrhynchos	47	0.0351971	0.0849762
Aves	Anas_platyrhynchos	48	0.0364781	0.0880687
Aves	Anas_platyrhynchos	49	0.0394854	0.0953293
Aves	Anas_platyrhynchos	50	0.0383716	0.0926402
Aves	Anas_platyrhynchos	51	0.0384273	0.0927747
Aves	Anas_platyrhynchos	52	0.0365337	0.0882032
Aves	Anas_platyrhynchos	53	0.0352528	0.0851107
Aves	Anas_platyrhynchos	54	0.0344732	0.0832283
Aves	Anas_platyrhynchos	55	0.039207	0.0946571
Aves	Anas_platyrhynchos	56	0.0346959	0.0837661
Aves	Anas_platyrhynchos	57	0.0346959	0.0837661
Aves	Anas_platyrhynchos	58	0.0379817	0.091699
Aves	Anas_platyrhynchos	59	0.0367008	0.0886065
Aves	Anas_platyrhynchos	60	0.0332479	0.0802703
Aves	Anas_platyrhynchos	61	0.0316886	0.0765055
Aves	Anas_platyrhynchos	62	0.0359768	0.0868586
Aves	Anas_platyrhynchos	63	0.0344175	0.0830938
Aves	Anas_platyrhynchos	64	0.0311317	0.0751609
Aves	Anas_platyrhynchos	65	0.0290711	0.0701861
Aves	Anas_platyrhynchos	66	0.0314658	0.0759677
Aves	Anas_platyrhynchos	67	0.0308532	0.0744886
Aves	Anas_platyrhynchos	68	0.031076	0.0750265
Aves	Anas_platyrhynchos	69	0.0380374	0.0918335
Aves	Anas_platyrhynchos	70	0.039207	0.0946571
Aves	Anas_platyrhynchos	71	0.0396525	0.0957327
Aves	Anas_platyrhynchos	72	0.0375362	0.0906234
Aves	Anas_platyrhynchos	73	0.037926	0.0915646
Aves	Anas_platyrhynchos	74	0.0395968	0.0955982
Aves	Anas_platyrhynchos	75	0.0391513	0.0945226
Aves	Anas_platyrhynchos	76	0.037759	0.0911612
Aves	Anas_platyrhynchos	77	0.0374248	0.0903545
Aves	Anas_platyrhynchos	78	0.0304077	0.073413
Aves	Anas_platyrhynchos	79	0.0344175	0.0830938
Aves	Anas_platyrhynchos	80	0.0295166	0.0712617
Aves	Anas_platyrhynchos	81	0.0299064	0.0722029
Aves	Anas_platyrhynchos	82	0.0335821	0.081077
Aves	Anas_platyrhynchos	83	0.0328581	0.0793291
Aves	Anas_platyrhynchos	84	0.0312987	0.0755643
Aves	Anas_platyrhynchos	85	0.0312987	0.0755643
Aves	Anas_platyrhynchos	86	0.0284028	0.0685726
Aves	Anas_platyrhynchos	87	0.0253954	0.061312
Aves	Anas_platyrhynchos	88	0.024393	0.0588917
Aves	Anas_platyrhynchos	89	0.0262865	0.0634632
Aves	Anas_platyrhynchos	90	0.0275117	0.0664213
Aves	Anas_platyrhynchos	91	0.0292938	0.0707239
Aves	Anas_platyrhynchos	92	0.0258409	0.0623876
Aves	Anas_platyrhynchos	93	0.0271775	0.0656145
Aves	Anas_platyrhynchos	94	0.0289597	0.0699171
Aves	Anas_platyrhynchos	95	0.0246157	0.0594296
Aves	Anas_platyrhynchos	96	0.0243373	0.0587573
Aves	Anas_platyrhynchos	97	0.0188795	0.0455806
Aves	Anas_platyrhynchos	98	0.0152038	0.0367065
Aves	Anas_platyrhynchos	99	0.0147026	0.0354964
Aves	Anas_platyrhynchos	100	0.0223881	0.0540513
Aves	Serinus_canaria	1	0.0761709	0.179394
Aves	Serinus_canaria	2	0.0441971	0.104091
Aves	Serinus_canaria	3	0.0445188	0.104849
Aves	Serinus_canaria	4	0.0395008	0.0930306
Aves	Serinus_canaria	5	0.0390504	0.0919699
Aves	Serinus_canaria	6	0.0391148	0.0921215
Aves	Serinus_canaria	7	0.0403371	0.0950003
Aves	Serinus_canaria	8	0.0366701	0.0863639
Aves	Serinus_canaria	9	0.0365414	0.0860608
Aves	Serinus_canaria	10	0.0371204	0.0874245
Aves	Serinus_canaria	11	0.0340324	0.0801517
Aves	Serinus_canaria	12	0.0353834	0.0833336
Aves	Serinus_canaria	13	0.0389861	0.0918184
Aves	Serinus_canaria	14	0.0362198	0.0853033
Aves	Serinus_canaria	15	0.0330674	0.077879
Aves	Serinus_canaria	16	0.0339681	0.0800002
Aves	Serinus_canaria	17	0.0327458	0.0771214
Aves	Serinus_canaria	18	0.0313304	0.0737881
Aves	Serinus_canaria	19	0.0288857	0.0680305
Aves	Serinus_canaria	20	0.0298507	0.0703032
Aves	Serinus_canaria	21	0.0315878	0.0743941
Aves	Serinus_canaria	22	0.0308801	0.0727275
Aves	Serinus_canaria	23	0.0310731	0.073182
Aves	Serinus_canaria	24	0.0293361	0.0690911
Aves	Serinus_canaria	25	0.0321024	0.0756063
Aves	Serinus_canaria	26	0.0319094	0.0751517
Aves	Serinus_canaria	27	0.0324241	0.0763638
Aves	Serinus_canaria	28	0.0325528	0.0766669
Aves	Serinus_canaria	29	0.0313948	0.0739396
Aves	Serinus_canaria	30	0.0306227	0.0721214
Aves	Serinus_canaria	31	0.0324884	0.0765154
Aves	Serinus_canaria	32	0.0299151	0.0704547
Aves	Serinus_canaria	33	0.0303654	0.0715153
Aves	Serinus_canaria	34	0.0285641	0.0672729
Aves	Serinus_canaria	35	0.0293361	0.0690911
Aves	Serinus_canaria	36	0.0288214	0.067879
Aves	Serinus_canaria	37	0.0313948	0.0739396
Aves	Serinus_canaria	38	0.0299794	0.0706062
Aves	Serinus_canaria	39	0.0296577	0.0698487
Aves	Serinus_canaria	40	0.0279851	0.0659093
Aves	Serinus_canaria	41	0.0278564	0.0656062
Aves	Serinus_canaria	42	0.0265054	0.0624244
Aves	Serinus_canaria	43	0.0293361	0.0690911
Aves	Serinus_canaria	44	0.0324884	0.0765154
Aves	Serinus_canaria	45	0.0326171	0.0768184
Aves	Serinus_canaria	46	0.0355121	0.0836366
Aves	Serinus_canaria	47	0.0330674	0.077879
Aves	Serinus_canaria	48	0.0369274	0.0869699
Aves	Serinus_canaria	49	0.0394364	0.092879
Aves	Serinus_canaria	50	0.0387931	0.0913639
Aves	Serinus_canaria	51	0.0384714	0.0906063
Aves	Serinus_canaria	52	0.0394364	0.092879
Aves	Serinus_canaria	53	0.0276634	0.0651517
Aves	Serinus_canaria	54	0.0312661	0.0736366
Aves	Serinus_canaria	55	0.0289501	0.068182
Aves	Serinus_canaria	56	0.0299151	0.0704547
Aves	Serinus_canaria	57	0.0315878	0.0743941
Aves	Serinus_canaria	58	0.0314591	0.0740911
Aves	Serinus_canaria	59	0.0322311	0.0759093
Aves	Serinus_canaria	60	0.0318451	0.0750002
Aves	Serinus_canaria	61	0.0295934	0.0696972
Aves	Serinus_canaria	62	0.0297864	0.0701517
Aves	Serinus_canaria	63	0.0314591	0.0740911
Aves	Serinus_canaria	64	0.0321024	0.0756063
Aves	Serinus_canaria	65	0.0308801	0.0727275
Aves	Serinus_canaria	66	0.0256691	0.0604547
Aves	Serinus_canaria	67	0.0281781	0.0663638
Aves	Serinus_canaria	68	0.0304941	0.0718184
Aves	Serinus_canaria	69	0.0304941	0.0718184
Aves	Serinus_canaria	70	0.0303011	0.0713638
Aves	Serinus_canaria	71	0.0294647	0.0693941
Aves	Serinus_canaria	72	0.0329388	0.077576
Aves	Serinus_canaria	73	0.0322954	0.0760608
Aves	Serinus_canaria	74	0.0328744	0.0774244
Aves	Serinus_canaria	75	0.0284354	0.0669699
Aves	Serinus_canaria	76	0.0317164	0.0746972
Aves	Serinus_canaria	77	0.0299151	0.0704547
Aves	Serinus_canaria	78	0.0321024	0.0756063
Aves	Serinus_canaria	79	0.0273417	0.0643941
Aves	Serinus_canaria	80	0.0257977	0.0607577
Aves	Serinus_canaria	81	0.0295291	0.0695456
Aves	Serinus_canaria	82	0.0301724	0.0710608
Aves	Serinus_canaria	83	0.0286927	0.0675759
Aves	Serinus_canaria	84	0.0314591	0.0740911
Aves	Serinus_canaria	85	0.0288857	0.0680305
Aves	Serinus_canaria	86	0.0297864	0.0701517
Aves	Serinus_canaria	87	0.0356408	0.0839396
Aves	Serinus_canaria	88	0.0295934	0.0696972
Aves	Serinus_canaria	89	0.0262481	0.0618183
Aves	Serinus_canaria	90	0.0268271	0.063182
Aves	Serinus_canaria	91	0.0280494	0.0660608
Aves	Serinus_canaria	92	0.0272774	0.0642426
Aves	Serinus_canaria	93	0.0295934	0.0696972
Aves	Serinus_canaria	94	0.0291431	0.0686365
Aves	Serinus_canaria	95	0.0248327	0.058485
Aves	Serinus_canaria	96	0.0245111	0.0577274
Aves	Serinus_canaria	97	0.0233531	0.0550001
Aves	Serinus_canaria	98	0.0234174	0.0551517
Aves	Serinus_canaria	99	0.0214231	0.0504547
Aves	Serinus_canaria	100	0.0324241	0.0763638
Aves	Pavo_cristatus	1	0.0488181	0.115327
Aves	Pavo_cristatus	2	0.0395041	0.0933241
Aves	Pavo_cristatus	3	0.0396326	0.0936276
Aves	Pavo_cristatus	4	0.0387975	0.0916549
Aves	Pavo_cristatus	5	0.0439363	0.103795
Aves	Pavo_cristatus	6	0.0488181	0.115327
Aves	Pavo_cristatus	7	0.0475334	0.112292
Aves	Pavo_cristatus	8	0.0463129	0.109409
Aves	Pavo_cristatus	9	0.047983	0.113355
Aves	Pavo_cristatus	10	0.0423947	0.100153
Aves	Pavo_cristatus	11	0.0422662	0.0998492
Aves	Pavo_cristatus	12	0.0412384	0.0974213
Aves	Pavo_cristatus	13	0.0426516	0.10076
Aves	Pavo_cristatus	14	0.0416238	0.0983318
Aves	Pavo_cristatus	15	0.0335946	0.0793635
Aves	Pavo_cristatus	16	0.0347508	0.0820949
Aves	Pavo_cristatus	17	0.0364851	0.0861921
Aves	Pavo_cristatus	18	0.0362282	0.0855851
Aves	Pavo_cristatus	19	0.0333376	0.0787565
Aves	Pavo_cristatus	20	0.0374486	0.0884683
Aves	Pavo_cristatus	21	0.0330164	0.0779977
Aves	Pavo_cristatus	22	0.0330164	0.0779977
Aves	Pavo_cristatus	23	0.0380267	0.089834
Aves	Pavo_cristatus	24	0.0368063	0.0869508
Aves	Pavo_cristatus	25	0.0406603	0.0960556
Aves	Pavo_cristatus	26	0.0375128	0.08862
Aves	Pavo_cristatus	27	0.0459918	0.108651
Aves	Pavo_cristatus	28	0.0452852	0.106981
Aves	Pavo_cristatus	29	0.0394399	0.0931724
Aves	Pavo_cristatus	30	0.0368063	0.0869508
Aves	Pavo_cristatus	31	0.0340442	0.0804257
Aves	Pavo_cristatus	32	0.0392472	0.0927172
Aves	Pavo_cristatus	33	0.0377055	0.0890752
Aves	Pavo_cristatus	34	0.0355858	0.0840676
Aves	Pavo_cristatus	35	0.0319245	0.075418
Aves	Pavo_cristatus	36	0.0313464	0.0740523
Aves	Pavo_cristatus	37	0.0323741	0.0764803
Aves	Pavo_cristatus	38	0.0312179	0.0737488
Aves	Pavo_cristatus	39	0.0294193	0.0694999
Aves	Pavo_cristatus	40	0.0298047	0.0704104
Aves	Pavo_cristatus	41	0.0314106	0.0742041
Aves	Pavo_cristatus	42	0.0348792	0.0823984
Aves	Pavo_cristatus	43	0.0377698	0.089227
Aves	Pavo_cristatus	44	0.0336588	0.0795152
Aves	Pavo_cristatus	45	0.0345581	0.0816397
Aves	Pavo_cristatus	46	0.0396968	0.0937794
Aves	Pavo_cristatus	47	0.0411742	0.0972696
Aves	Pavo_cristatus	48	0.0383479	0.0905927
Aves	Pavo_cristatus	49	0.0410457	0.0969661
Aves	Pavo_cristatus	50	0.0432939	0.102277
Aves	Pavo_cristatus	51	0.0445786	0.105312
Aves	Pavo_cristatus	52	0.0423304	0.100001
Aves	Pavo_cristatus	53	0.0402107	0.0949934
Aves	Pavo_cristatus	54	0.041945	0.0990905
Aves	Pavo_cristatus	55	0.0421377	0.0995458
Aves	Pavo_cristatus	56	0.044129	0.10425
Aves	Pavo_cristatus	57	0.0448998	0.106071
Aves	Pavo_cristatus	58	0.0443859	0.104857
Aves	Pavo_cristatus	59	0.0474692	0.112141
Aves	Pavo_cristatus	60	0.0440647	0.104098
Aves	Pavo_cristatus	61	0.0413027	0.0975731
Aves	Pavo_cristatus	62	0.0357143	0.0843711
Aves	Pavo_cristatus	63	0.0381552	0.0901375
Aves	Pavo_cristatus	64	0.0409173	0.0966626
Aves	Pavo_cristatus	65	0.0431655	0.101974
Aves	Pavo_cristatus	66	0.0489466	0.115631
Aves	Pavo_cristatus	67	0.0507451	0.11988
Aves	Pavo_cristatus	68	0.061408	0.14507
Aves	Pavo_cristatus	69	0.0563977	0.133233
Aves	Pavo_cristatus	70	0.0412384	0.0974213
Aves	Pavo_cristatus	71	0.0463772	0.109561
Aves	Pavo_cristatus	72	0.0422662	0.0998492
Aves	Pavo_cristatus	73	0.0511305	0.12079
Aves	Pavo_cristatus	74	0.0450925	0.106526
Aves	Pavo_cristatus	75	0.0463772	0.109561
Aves	Pavo_cristatus	76	0.0451567	0.106678
Aves	Pavo_cristatus	77	0.0405961	0.0959038
Aves	Pavo_cristatus	78	0.0410457	0.0969661
Aves	Pavo_cristatus	79	0.0413027	0.0975731
Aves	Pavo_cristatus	80	0.0407888	0.0963591
Aves	Pavo_cristatus	81	0.0351362	0.0830054
Aves	Pavo_cristatus	82	0.0320529	0.0757215
Aves	Pavo_cristatus	83	0.0334018	0.0789082
Aves	Pavo_cristatus	84	0.0311536	0.0735971
Aves	Pavo_cristatus	85	0.0325668	0.0769355
Aves	Pavo_cristatus	86	0.0306398	0.0723831
Aves	Pavo_cristatus	87	0.0332091	0.078453
Aves	Pavo_cristatus	88	0.0371274	0.0877095
Aves	Pavo_cristatus	89	0.0375771	0.0887717
Aves	Pavo_cristatus	90	0.0372559	0.088013
Aves	Pavo_cristatus	91	0.0335946	0.0793635
Aves	Pavo_cristatus	92	0.0318602	0.0752663
Aves	Pavo_cristatus	93	0.0387333	0.0915032
Aves	Pavo_cristatus	94	0.0357785	0.0845228
Aves	Pavo_cristatus	95	0.039761	0.0939311
Aves	Pavo_cristatus	96	0.0328237	0.0775425
Aves	Pavo_cristatus	97	0.03398	0.0802739
Aves	Pavo_cristatus	98	0.0321814	0.076025
Aves	Pavo_cristatus	99	0.0284558	0.0672237
Aves	Pavo_cristatus	100	0.0403392	0.0952969
Aves	Coturnix_japonica	1	0.0586863	0.142166
Aves	Coturnix_japonica	2	0.0444662	0.107718
Aves	Coturnix_japonica	3	0.0451433	0.109359
Aves	Coturnix_japonica	4	0.0510872	0.123758
Aves	Coturnix_japonica	5	0.053871	0.130502
Aves	Coturnix_japonica	6	0.051012	0.123575
Aves	Coturnix_japonica	7	0.0531939	0.128861
Aves	Coturnix_japonica	8	0.0379956	0.0920437
Aves	Coturnix_japonica	9	0.0346851	0.084024
Aves	Coturnix_japonica	10	0.0349108	0.0845708
Aves	Coturnix_japonica	11	0.0384471	0.0931373
Aves	Coturnix_japonica	12	0.0404033	0.0978762
Aves	Coturnix_japonica	13	0.0396509	0.0960535
Aves	Coturnix_japonica	14	0.0372432	0.090221
Aves	Coturnix_japonica	15	0.0372432	0.090221
Aves	Coturnix_japonica	16	0.0382966	0.0927728
Aves	Coturnix_japonica	17	0.0386728	0.0936841
Aves	Coturnix_japonica	18	0.0413061	0.100063
Aves	Coturnix_japonica	19	0.0383718	0.092955
Aves	Coturnix_japonica	20	0.0412309	0.0998811
Aves	Coturnix_japonica	21	0.0434128	0.105167
Aves	Coturnix_japonica	22	0.0414566	0.100428
Aves	Coturnix_japonica	23	0.039049	0.0945954
Aves	Coturnix_japonica	24	0.0392747	0.0951422
Aves	Coturnix_japonica	25	0.0330299	0.0800142
Aves	Coturnix_japonica	26	0.0323527	0.0783738
Aves	Coturnix_japonica	27	0.0349108	0.0845708
Aves	Coturnix_japonica	28	0.0361899	0.0876693
Aves	Coturnix_japonica	29	0.0385975	0.0935018
Aves	Coturnix_japonica	30	0.0376194	0.0911324
Aves	Coturnix_japonica	31	0.0328042	0.0794674
Aves	Coturnix_japonica	32	0.0340832	0.0825659
Aves	Coturnix_japonica	33	0.0362651	0.0878516
Aves	Coturnix_japonica	34	0.0355128	0.086029
Aves	Coturnix_japonica	35	0.0366413	0.0887629
Aves	Coturnix_japonica	36	0.034008	0.0823837
Aves	Coturnix_japonica	37	0.0348356	0.0843886
Aves	Coturnix_japonica	38	0.0336318	0.0814723
Aves	Coturnix_japonica	39	0.0339327	0.0822014
Aves	Coturnix_japonica	40	0.0354375	0.0858467
Aves	Coturnix_japonica	41	0.0413814	0.100246
Aves	Coturnix_japonica	42	0.0417576	0.101157
Aves	Coturnix_japonica	43	0.0455948	0.110452
Aves	Coturnix_japonica	44	0.0451433	0.109359
Aves	Coturnix_japonica	45	0.0415319	0.10061
Aves	Coturnix_japonica	46	0.0455948	0.110452
Aves	Coturnix_japonica	47	0.0417576	0.101157
Aves	Coturnix_japonica	48	0.0402528	0.0975116
Aves	Coturnix_japonica	49	0.0434881	0.105349
Aves	Coturnix_japonica	50	0.0429614	0.104073
Aves	Coturnix_japonica	51	0.0411557	0.0996988
Aves	Coturnix_japonica	52	0.0394252	0.0955067
Aves	Coturnix_japonica	53	0.0404033	0.0978762
Aves	Coturnix_japonica	54	0.0414566	0.100428
Aves	Coturnix_japonica	55	0.0407042	0.0986052
Aves	Coturnix_japonica	56	0.0361899	0.0876693
Aves	Coturnix_japonica	57	0.0331051	0.0801965
Aves	Coturnix_japonica	58	0.033707	0.0816546
Aves	Coturnix_japonica	59	0.0359642	0.0871225
Aves	Coturnix_japonica	60	0.0401023	0.0971471
Aves	Coturnix_japonica	61	0.0435633	0.105531
Aves	Coturnix_japonica	62	0.0473253	0.114645
Aves	Coturnix_japonica	63	0.0461214	0.111728
Aves	Coturnix_japonica	64	0.0377699	0.0914969
Aves	Coturnix_japonica	65	0.0378452	0.0916792
Aves	Coturnix_japonica	66	0.0376947	0.0913146
Aves	Coturnix_japonica	67	0.0393499	0.0953245
Aves	Coturnix_japonica	68	0.0338575	0.0820191
Aves	Coturnix_japonica	69	0.0345346	0.0836595
Aves	Coturnix_japonica	70	0.0397261	0.0962358
Aves	Coturnix_japonica	71	0.037168	0.0900388
Aves	Coturnix_japonica	72	0.0370175	0.0896743
Aves	Coturnix_japonica	73	0.0376194	0.0911324
Aves	Coturnix_japonica	74	0.0357385	0.0865758
Aves	Coturnix_japonica	75	0.035588	0.0862112
Aves	Coturnix_japonica	76	0.0373185	0.0904033
Aves	Coturnix_japonica	77	0.0418328	0.101339
Aves	Coturnix_japonica	78	0.0462719	0.112093
Aves	Coturnix_japonica	79	0.0455195	0.11027
Aves	Coturnix_japonica	80	0.0372432	0.090221
Aves	Coturnix_japonica	81	0.040629	0.098423
Aves	Coturnix_japonica	82	0.0388233	0.0940486
Aves	Coturnix_japonica	83	0.0377699	0.0914969
Aves	Coturnix_japonica	84	0.035287	0.0854822
Aves	Coturnix_japonica	85	0.0393499	0.0953245
Aves	Coturnix_japonica	86	0.04409	0.106807
Aves	Coturnix_japonica	87	0.0441652	0.106989
Aves	Coturnix_japonica	88	0.045369	0.109906
Aves	Coturnix_japonica	89	0.040328	0.0976939
Aves	Coturnix_japonica	90	0.0377699	0.0914969
Aves	Coturnix_japonica	91	0.0335565	0.0812901
Aves	Coturnix_japonica	92	0.0322775	0.0781916
Aves	Coturnix_japonica	93	0.0303213	0.0734527
Aves	Coturnix_japonica	94	0.0300956	0.0729059
Aves	Coturnix_japonica	95	0.0281393	0.068167
Aves	Coturnix_japonica	96	0.0288165	0.0698074
Aves	Coturnix_japonica	97	0.0296441	0.0718123
Aves	Coturnix_japonica	98	0.0283651	0.0687138
Aves	Coturnix_japonica	99	0.0272365	0.0659798
[truncated: 7,301 more rows]

## Sheet: G4 density in exons
clade	species	bin_num	count	normalized_density
Amphibians	Xenopus_tropicalis	1	0.246533	0.605286
Amphibians	Xenopus_tropicalis	2	0.157959	0.387821
Amphibians	Xenopus_tropicalis	3	0.15805	0.388044
Amphibians	Xenopus_tropicalis	4	0.159642	0.391951
Amphibians	Xenopus_tropicalis	5	0.15846	0.389049
Amphibians	Xenopus_tropicalis	6	0.163507	0.40144
Amphibians	Xenopus_tropicalis	7	0.165689	0.406799
Amphibians	Xenopus_tropicalis	8	0.163279	0.400882
Amphibians	Xenopus_tropicalis	9	0.163006	0.400212
Amphibians	Xenopus_tropicalis	10	0.16437	0.403561
Amphibians	Xenopus_tropicalis	11	0.165871	0.407245
Amphibians	Xenopus_tropicalis	12	0.16528	0.405794
Amphibians	Xenopus_tropicalis	13	0.167553	0.411376
Amphibians	Xenopus_tropicalis	14	0.169327	0.415729
Amphibians	Xenopus_tropicalis	15	0.169463	0.416064
Amphibians	Xenopus_tropicalis	16	0.171873	0.421981
Amphibians	Xenopus_tropicalis	17	0.172328	0.423097
Amphibians	Xenopus_tropicalis	18	0.173191	0.425218
Amphibians	Xenopus_tropicalis	19	0.173555	0.426112
Amphibians	Xenopus_tropicalis	20	0.175374	0.430577
Amphibians	Xenopus_tropicalis	21	0.173146	0.425107
Amphibians	Xenopus_tropicalis	22	0.175238	0.430242
Amphibians	Xenopus_tropicalis	23	0.177602	0.436047
Amphibians	Xenopus_tropicalis	24	0.178511	0.43828
Amphibians	Xenopus_tropicalis	25	0.180421	0.442968
Amphibians	Xenopus_tropicalis	26	0.178193	0.437498
Amphibians	Xenopus_tropicalis	27	0.17642	0.433145
Amphibians	Xenopus_tropicalis	28	0.17592	0.431917
Amphibians	Xenopus_tropicalis	29	0.177375	0.435489
Amphibians	Xenopus_tropicalis	30	0.179012	0.439508
Amphibians	Xenopus_tropicalis	31	0.180148	0.442299
Amphibians	Xenopus_tropicalis	32	0.182012	0.446876
Amphibians	Xenopus_tropicalis	33	0.183149	0.449667
Amphibians	Xenopus_tropicalis	34	0.181012	0.44442
Amphibians	Xenopus_tropicalis	35	0.181831	0.446429
Amphibians	Xenopus_tropicalis	36	0.18083	0.443973
Amphibians	Xenopus_tropicalis	37	0.181149	0.444755
Amphibians	Xenopus_tropicalis	38	0.181376	0.445313
Amphibians	Xenopus_tropicalis	39	0.180648	0.443527
Amphibians	Xenopus_tropicalis	40	0.181512	0.445648
Amphibians	Xenopus_tropicalis	41	0.181785	0.446317
Amphibians	Xenopus_tropicalis	42	0.181603	0.445871
Amphibians	Xenopus_tropicalis	43	0.179375	0.440401
Amphibians	Xenopus_tropicalis	44	0.183058	0.449443
Amphibians	Xenopus_tropicalis	45	0.18515	0.454578
Amphibians	Xenopus_tropicalis	46	0.185832	0.456253
Amphibians	Xenopus_tropicalis	47	0.186741	0.458486
Amphibians	Xenopus_tropicalis	48	0.186014	0.4567
Amphibians	Xenopus_tropicalis	49	0.18756	0.460495
Amphibians	Xenopus_tropicalis	50	0.186787	0.458597
Amphibians	Xenopus_tropicalis	51	0.18615	0.457034
Amphibians	Xenopus_tropicalis	52	0.184877	0.453909
Amphibians	Xenopus_tropicalis	53	0.180421	0.442968
Amphibians	Xenopus_tropicalis	54	0.180603	0.443415
Amphibians	Xenopus_tropicalis	55	0.180421	0.442968
Amphibians	Xenopus_tropicalis	56	0.182967	0.44922
Amphibians	Xenopus_tropicalis	57	0.183786	0.451229
Amphibians	Xenopus_tropicalis	58	0.184104	0.452011
Amphibians	Xenopus_tropicalis	59	0.18565	0.455806
Amphibians	Xenopus_tropicalis	60	0.188014	0.461612
Amphibians	Xenopus_tropicalis	61	0.184331	0.452569
Amphibians	Xenopus_tropicalis	62	0.18083	0.443973
Amphibians	Xenopus_tropicalis	63	0.183195	0.449778
Amphibians	Xenopus_tropicalis	64	0.180603	0.443415
Amphibians	Xenopus_tropicalis	65	0.17933	0.440289
Amphibians	Xenopus_tropicalis	66	0.178011	0.437052
Amphibians	Xenopus_tropicalis	67	0.177056	0.434707
Amphibians	Xenopus_tropicalis	68	0.175829	0.431693
Amphibians	Xenopus_tropicalis	69	0.17692	0.434373
Amphibians	Xenopus_tropicalis	70	0.179694	0.441182
Amphibians	Xenopus_tropicalis	71	0.177466	0.435712
Amphibians	Xenopus_tropicalis	72	0.177466	0.435712
Amphibians	Xenopus_tropicalis	73	0.175965	0.432028
Amphibians	Xenopus_tropicalis	74	0.175965	0.432028
Amphibians	Xenopus_tropicalis	75	0.171873	0.421981
Amphibians	Xenopus_tropicalis	76	0.170009	0.417404
Amphibians	Xenopus_tropicalis	77	0.16919	0.415395
Amphibians	Xenopus_tropicalis	78	0.166417	0.408585
Amphibians	Xenopus_tropicalis	79	0.161824	0.39731
Amphibians	Xenopus_tropicalis	80	0.162415	0.398761
Amphibians	Xenopus_tropicalis	81	0.161324	0.396082
Amphibians	Xenopus_tropicalis	82	0.161915	0.397533
Amphibians	Xenopus_tropicalis	83	0.161961	0.397645
Amphibians	Xenopus_tropicalis	84	0.157777	0.387374
Amphibians	Xenopus_tropicalis	85	0.155913	0.382797
Amphibians	Xenopus_tropicalis	86	0.154595	0.37956
Amphibians	Xenopus_tropicalis	87	0.14982	0.367838
Amphibians	Xenopus_tropicalis	88	0.148365	0.364266
Amphibians	Xenopus_tropicalis	89	0.146774	0.360358
Amphibians	Xenopus_tropicalis	90	0.145683	0.357679
Amphibians	Xenopus_tropicalis	91	0.144319	0.35433
Amphibians	Xenopus_tropicalis	92	0.143318	0.351874
Amphibians	Xenopus_tropicalis	93	0.143546	0.352432
Amphibians	Xenopus_tropicalis	94	0.141636	0.347744
Amphibians	Xenopus_tropicalis	95	0.14009	0.343948
Amphibians	Xenopus_tropicalis	96	0.138953	0.341157
Amphibians	Xenopus_tropicalis	97	0.137271	0.337027
Amphibians	Xenopus_tropicalis	98	0.137135	0.336692
Amphibians	Xenopus_tropicalis	99	0.135725	0.333231
Amphibians	Xenopus_tropicalis	100	0.239758	0.588652
Amphibians	Leptobrachium_leishanense	1	0.109057	0.249331
Amphibians	Leptobrachium_leishanense	2	0.0704337	0.161028
Amphibians	Leptobrachium_leishanense	3	0.0725418	0.165848
Amphibians	Leptobrachium_leishanense	4	0.0724289	0.16559
Amphibians	Leptobrachium_leishanense	5	0.0706595	0.161544
Amphibians	Leptobrachium_leishanense	6	0.0703207	0.16077
Amphibians	Leptobrachium_leishanense	7	0.0707725	0.161803
Amphibians	Leptobrachium_leishanense	8	0.0706595	0.161544
Amphibians	Leptobrachium_leishanense	9	0.0711866	0.162749
Amphibians	Leptobrachium_leishanense	10	0.0732947	0.167569
Amphibians	Leptobrachium_leishanense	11	0.073897	0.168946
Amphibians	Leptobrachium_leishanense	12	0.0754781	0.172561
Amphibians	Leptobrachium_leishanense	13	0.0770592	0.176176
Amphibians	Leptobrachium_leishanense	14	0.079619	0.182028
Amphibians	Leptobrachium_leishanense	15	0.0812378	0.185729
Amphibians	Leptobrachium_leishanense	16	0.0798073	0.182458
Amphibians	Leptobrachium_leishanense	17	0.0793179	0.181339
Amphibians	Leptobrachium_leishanense	18	0.0790544	0.180737
Amphibians	Leptobrachium_leishanense	19	0.0782638	0.17893
Amphibians	Leptobrachium_leishanense	20	0.0776991	0.177639
Amphibians	Leptobrachium_leishanense	21	0.0782638	0.17893
Amphibians	Leptobrachium_leishanense	22	0.078452	0.17936
Amphibians	Leptobrachium_leishanense	23	0.0792426	0.181167
Amphibians	Leptobrachium_leishanense	24	0.0790544	0.180737
Amphibians	Leptobrachium_leishanense	25	0.0772098	0.17652
Amphibians	Leptobrachium_leishanense	26	0.0786026	0.179704
Amphibians	Leptobrachium_leishanense	27	0.0782262	0.178844
Amphibians	Leptobrachium_leishanense	28	0.0791296	0.180909
Amphibians	Leptobrachium_leishanense	29	0.0786779	0.179876
Amphibians	Leptobrachium_leishanense	30	0.0784897	0.179446
Amphibians	Leptobrachium_leishanense	31	0.0803343	0.183663
Amphibians	Leptobrachium_leishanense	32	0.0817271	0.186848
Amphibians	Leptobrachium_leishanense	33	0.0814636	0.186245
Amphibians	Leptobrachium_leishanense	34	0.082593	0.188827
Amphibians	Leptobrachium_leishanense	35	0.0836094	0.191151
Amphibians	Leptobrachium_leishanense	36	0.084287	0.1927
Amphibians	Leptobrachium_leishanense	37	0.0845505	0.193303
Amphibians	Leptobrachium_leishanense	38	0.0853034	0.195024
Amphibians	Leptobrachium_leishanense	39	0.0866586	0.198122
Amphibians	Leptobrachium_leishanense	40	0.0868845	0.198639
Amphibians	Leptobrachium_leishanense	41	0.0856046	0.195712
Amphibians	Leptobrachium_leishanense	42	0.0836847	0.191323
Amphibians	Leptobrachium_leishanense	43	0.0822918	0.188139
Amphibians	Leptobrachium_leishanense	44	0.08248	0.188569
Amphibians	Leptobrachium_leishanense	45	0.0822542	0.188053
Amphibians	Leptobrachium_leishanense	46	0.0816142	0.186589
Amphibians	Leptobrachium_leishanense	47	0.0803343	0.183663
Amphibians	Leptobrachium_leishanense	48	0.079092	0.180823
Amphibians	Leptobrachium_leishanense	49	0.0778874	0.178069
Amphibians	Leptobrachium_leishanense	50	0.0771345	0.176348
Amphibians	Leptobrachium_leishanense	51	0.0754028	0.172389
Amphibians	Leptobrachium_leishanense	52	0.075591	0.172819
Amphibians	Leptobrachium_leishanense	53	0.0766451	0.175229
Amphibians	Leptobrachium_leishanense	54	0.0786403	0.17979
Amphibians	Leptobrachium_leishanense	55	0.0795061	0.18177
Amphibians	Leptobrachium_leishanense	56	0.0793555	0.181426
Amphibians	Leptobrachium_leishanense	57	0.0796943	0.1822
Amphibians	Leptobrachium_leishanense	58	0.0787908	0.180135
Amphibians	Leptobrachium_leishanense	59	0.0787532	0.180048
Amphibians	Leptobrachium_leishanense	60	0.0777368	0.177725
Amphibians	Leptobrachium_leishanense	61	0.0775109	0.177208
Amphibians	Leptobrachium_leishanense	62	0.0773227	0.176778
Amphibians	Leptobrachium_leishanense	63	0.0775862	0.17738
Amphibians	Leptobrachium_leishanense	64	0.0781132	0.178585
Amphibians	Leptobrachium_leishanense	65	0.0770215	0.176089
Amphibians	Leptobrachium_leishanense	66	0.078565	0.179618
Amphibians	Leptobrachium_leishanense	67	0.0795437	0.181856
Amphibians	Leptobrachium_leishanense	68	0.0783391	0.179102
Amphibians	Leptobrachium_leishanense	69	0.0781885	0.178757
Amphibians	Leptobrachium_leishanense	70	0.0773603	0.176864
Amphibians	Leptobrachium_leishanense	71	0.0751393	0.171786
Amphibians	Leptobrachium_leishanense	72	0.074537	0.170409
Amphibians	Leptobrachium_leishanense	73	0.07273	0.166278
Amphibians	Leptobrachium_leishanense	74	0.0719018	0.164385
Amphibians	Leptobrachium_leishanense	75	0.0728806	0.166622
Amphibians	Leptobrachium_leishanense	76	0.0730688	0.167053
Amphibians	Leptobrachium_leishanense	77	0.07209	0.164815
Amphibians	Leptobrachium_leishanense	78	0.0722783	0.165245
Amphibians	Leptobrachium_leishanense	79	0.071563	0.16361
Amphibians	Leptobrachium_leishanense	80	0.0721653	0.164987
Amphibians	Leptobrachium_leishanense	81	0.0721277	0.164901
Amphibians	Leptobrachium_leishanense	82	0.071563	0.16361
Amphibians	Leptobrachium_leishanense	83	0.0711113	0.162577
Amphibians	Leptobrachium_leishanense	84	0.07209	0.164815
Amphibians	Leptobrachium_leishanense	85	0.0708854	0.162061
Amphibians	Leptobrachium_leishanense	86	0.071676	0.163868
Amphibians	Leptobrachium_leishanense	87	0.0725041	0.165762
Amphibians	Leptobrachium_leishanense	88	0.0699443	0.159909
Amphibians	Leptobrachium_leishanense	89	0.0673468	0.153971
Amphibians	Leptobrachium_leishanense	90	0.0665562	0.152163
Amphibians	Leptobrachium_leishanense	91	0.0671962	0.153626
Amphibians	Leptobrachium_leishanense	92	0.0672715	0.153799
Amphibians	Leptobrachium_leishanense	93	0.066895	0.152938
Amphibians	Leptobrachium_leishanense	94	0.0669703	0.15311
Amphibians	Leptobrachium_leishanense	95	0.066895	0.152938
Amphibians	Leptobrachium_leishanense	96	0.0677985	0.155003
Amphibians	Leptobrachium_leishanense	97	0.0679867	0.155434
Amphibians	Leptobrachium_leishanense	98	0.0699819	0.159995
Amphibians	Leptobrachium_leishanense	99	0.0688902	0.157499
Amphibians	Leptobrachium_leishanense	100	0.11877	0.271536
Aves	Aquila_chrysaetos	1	0.437909	1.03992
Aves	Aquila_chrysaetos	2	0.2601	0.617668
Aves	Aquila_chrysaetos	3	0.262823	0.624135
Aves	Aquila_chrysaetos	4	0.259127	0.615358
Aves	Aquila_chrysaetos	5	0.257182	0.610738
Aves	Aquila_chrysaetos	6	0.251994	0.598419
Aves	Aquila_chrysaetos	7	0.248557	0.590257
Aves	Aquila_chrysaetos	8	0.244537	0.580709
Aves	Aquila_chrysaetos	9	0.245509	0.583019
Aves	Aquila_chrysaetos	10	0.247714	0.588255
Aves	Aquila_chrysaetos	11	0.248946	0.591181
Aves	Aquila_chrysaetos	12	0.249724	0.593029
Aves	Aquila_chrysaetos	13	0.249335	0.592105
Aves	Aquila_chrysaetos	14	0.248622	0.590411
Aves	Aquila_chrysaetos	15	0.243499	0.578245
Aves	Aquila_chrysaetos	16	0.246741	0.585945
Aves	Aquila_chrysaetos	17	0.248881	0.591027
Aves	Aquila_chrysaetos	18	0.250373	0.594569
Aves	Aquila_chrysaetos	19	0.249789	0.593183
Aves	Aquila_chrysaetos	20	0.250049	0.593799
Aves	Aquila_chrysaetos	21	0.252189	0.59888
Aves	Aquila_chrysaetos	22	0.252707	0.600112
Aves	Aquila_chrysaetos	23	0.251994	0.598419
Aves	Aquila_chrysaetos	24	0.253939	0.603038
Aves	Aquila_chrysaetos	25	0.258544	0.613972
Aves	Aquila_chrysaetos	26	0.259581	0.616436
Aves	Aquila_chrysaetos	27	0.26211	0.622441
Aves	Aquila_chrysaetos	28	0.263083	0.624751
Aves	Aquila_chrysaetos	29	0.262305	0.622903
Aves	Aquila_chrysaetos	30	0.260035	0.617514
Aves	Aquila_chrysaetos	31	0.26023	0.617976
Aves	Aquila_chrysaetos	32	0.262045	0.622287
Aves	Aquila_chrysaetos	33	0.259776	0.616898
Aves	Aquila_chrysaetos	34	0.259646	0.61659
Aves	Aquila_chrysaetos	35	0.261008	0.619824
Aves	Aquila_chrysaetos	36	0.258349	0.61351
Aves	Aquila_chrysaetos	37	0.255625	0.607042
Aves	Aquila_chrysaetos	38	0.252448	0.599496
Aves	Aquila_chrysaetos	39	0.256339	0.608736
Aves	Aquila_chrysaetos	40	0.259062	0.615204
Aves	Aquila_chrysaetos	41	0.264185	0.627369
Aves	Aquila_chrysaetos	42	0.261008	0.619824
Aves	Aquila_chrysaetos	43	0.262759	0.623981
Aves	Aquila_chrysaetos	44	0.260035	0.617514
Aves	Aquila_chrysaetos	45	0.26211	0.622441
Aves	Aquila_chrysaetos	46	0.263213	0.625059
Aves	Aquila_chrysaetos	47	0.25984	0.617052
Aves	Aquila_chrysaetos	48	0.260683	0.619054
Aves	Aquila_chrysaetos	49	0.264056	0.627061
Aves	Aquila_chrysaetos	50	0.262888	0.624289
Aves	Aquila_chrysaetos	51	0.263018	0.624597
Aves	Aquila_chrysaetos	52	0.262823	0.624135
Aves	Aquila_chrysaetos	53	0.260748	0.619208
Aves	Aquila_chrysaetos	54	0.26438	0.627831
Aves	Aquila_chrysaetos	55	0.264639	0.628447
Aves	Aquila_chrysaetos	56	0.267168	0.634453
Aves	Aquila_chrysaetos	57	0.265612	0.630757
Aves	Aquila_chrysaetos	58	0.263407	0.625521
Aves	Aquila_chrysaetos	59	0.260035	0.617514
Aves	Aquila_chrysaetos	60	0.262564	0.623519
Aves	Aquila_chrysaetos	61	0.260165	0.617822
Aves	Aquila_chrysaetos	62	0.260619	0.6189
Aves	Aquila_chrysaetos	63	0.256209	0.608428
Aves	Aquila_chrysaetos	64	0.258544	0.613972
Aves	Aquila_chrysaetos	65	0.257701	0.61197
Aves	Aquila_chrysaetos	66	0.258544	0.613972
Aves	Aquila_chrysaetos	67	0.254847	0.605194
Aves	Aquila_chrysaetos	68	0.24953	0.592567
Aves	Aquila_chrysaetos	69	0.247974	0.588871
Aves	Aquila_chrysaetos	70	0.24525	0.582403
Aves	Aquila_chrysaetos	71	0.245963	0.584097
Aves	Aquila_chrysaetos	72	0.243175	0.577475
Aves	Aquila_chrysaetos	73	0.244212	0.579939
Aves	Aquila_chrysaetos	74	0.245445	0.582865
Aves	Aquila_chrysaetos	75	0.241943	0.57455
Aves	Aquila_chrysaetos	76	0.240192	0.570392
Aves	Aquila_chrysaetos	77	0.236755	0.56223
Aves	Aquila_chrysaetos	78	0.235523	0.559304
Aves	Aquila_chrysaetos	79	0.235977	0.560382
Aves	Aquila_chrysaetos	80	0.235069	0.558226
Aves	Aquila_chrysaetos	81	0.232281	0.551605
Aves	Aquila_chrysaetos	82	0.227741	0.540825
Aves	Aquila_chrysaetos	83	0.225601	0.535743
Aves	Aquila_chrysaetos	84	0.224694	0.533587
Aves	Aquila_chrysaetos	85	0.220219	0.522962
Aves	Aquila_chrysaetos	86	0.217496	0.516494
Aves	Aquila_chrysaetos	87	0.217301	0.516032
Aves	Aquila_chrysaetos	88	0.220089	0.522654
Aves	Aquila_chrysaetos	89	0.21983	0.522038
Aves	Aquila_chrysaetos	90	0.219571	0.521422
Aves	Aquila_chrysaetos	91	0.219311	0.520806
Aves	Aquila_chrysaetos	92	0.217755	0.51711
Aves	Aquila_chrysaetos	93	0.218857	0.519728
Aves	Aquila_chrysaetos	94	0.218339	0.518496
Aves	Aquila_chrysaetos	95	0.217625	0.516802
Aves	Aquila_chrysaetos	96	0.217107	0.51557
Aves	Aquila_chrysaetos	97	0.221062	0.524964
Aves	Aquila_chrysaetos	98	0.22612	0.536975
Aves	Aquila_chrysaetos	99	0.232605	0.552374
Aves	Aquila_chrysaetos	100	0.436807	1.0373
Aves	Meleagris_gallopavo	1	0.251294	0.607577
Aves	Meleagris_gallopavo	2	0.154522	0.373602
Aves	Meleagris_gallopavo	3	0.154181	0.372779
Aves	Meleagris_gallopavo	4	0.156293	0.377883
Aves	Meleagris_gallopavo	5	0.155952	0.37706
Aves	Meleagris_gallopavo	6	0.155407	0.375743
Aves	Meleagris_gallopavo	7	0.15207	0.367675
Aves	Meleagris_gallopavo	8	0.150504	0.363888
Aves	Meleagris_gallopavo	9	0.148052	0.35796
Aves	Meleagris_gallopavo	10	0.149142	0.360595
Aves	Meleagris_gallopavo	11	0.153705	0.371626
Aves	Meleagris_gallopavo	12	0.154113	0.372614
Aves	Meleagris_gallopavo	13	0.154522	0.373602
Aves	Meleagris_gallopavo	14	0.156905	0.379365
Aves	Meleagris_gallopavo	15	0.157586	0.381012
Aves	Meleagris_gallopavo	16	0.157246	0.380189
Aves	Meleagris_gallopavo	17	0.157518	0.380847
Aves	Meleagris_gallopavo	18	0.155271	0.375414
Aves	Meleagris_gallopavo	19	0.157995	0.382
Aves	Meleagris_gallopavo	20	0.156224	0.377719
Aves	Meleagris_gallopavo	21	0.154999	0.374755
Aves	Meleagris_gallopavo	22	0.154181	0.372779
Aves	Meleagris_gallopavo	23	0.153364	0.370803
Aves	Meleagris_gallopavo	24	0.154999	0.374755
Aves	Meleagris_gallopavo	25	0.154999	0.374755
Aves	Meleagris_gallopavo	26	0.156769	0.379036
Aves	Meleagris_gallopavo	27	0.157518	0.380847
Aves	Meleagris_gallopavo	28	0.15888	0.38414
Aves	Meleagris_gallopavo	29	0.159902	0.38661
Aves	Meleagris_gallopavo	30	0.163035	0.394184
Aves	Meleagris_gallopavo	31	0.162966	0.39402
Aves	Meleagris_gallopavo	32	0.160855	0.388915
Aves	Meleagris_gallopavo	33	0.159902	0.38661
Aves	Meleagris_gallopavo	34	0.160719	0.388586
Aves	Meleagris_gallopavo	35	0.159357	0.385293
Aves	Meleagris_gallopavo	36	0.160583	0.388257
Aves	Meleagris_gallopavo	37	0.161332	0.390068
Aves	Meleagris_gallopavo	38	0.161673	0.390891
Aves	Meleagris_gallopavo	39	0.162694	0.393361
Aves	Meleagris_gallopavo	40	0.163852	0.39616
Aves	Meleagris_gallopavo	41	0.159766	0.386281
Aves	Meleagris_gallopavo	42	0.160242	0.387433
Aves	Meleagris_gallopavo	43	0.157995	0.382
Aves	Meleagris_gallopavo	44	0.158131	0.382329
Aves	Meleagris_gallopavo	45	0.160583	0.388257
Aves	Meleagris_gallopavo	46	0.160651	0.388421
Aves	Meleagris_gallopavo	47	0.158949	0.384305
Aves	Meleagris_gallopavo	48	0.158812	0.383976
Aves	Meleagris_gallopavo	49	0.15745	0.380683
Aves	Meleagris_gallopavo	50	0.155884	0.376895
Aves	Meleagris_gallopavo	51	0.159289	0.385128
Aves	Meleagris_gallopavo	52	0.160515	0.388092
Aves	Meleagris_gallopavo	53	0.160515	0.388092
Aves	Meleagris_gallopavo	54	0.164805	0.398465
Aves	Meleagris_gallopavo	55	0.16501	0.398959
Aves	Meleagris_gallopavo	56	0.163716	0.395831
Aves	Meleagris_gallopavo	57	0.163103	0.394349
Aves	Meleagris_gallopavo	58	0.161809	0.39122
Aves	Meleagris_gallopavo	59	0.163443	0.395172
Aves	Meleagris_gallopavo	60	0.16249	0.392867
Aves	Meleagris_gallopavo	61	0.162081	0.391879
Aves	Meleagris_gallopavo	62	0.15963	0.385951
Aves	Meleagris_gallopavo	63	0.161536	0.390562
Aves	Meleagris_gallopavo	64	0.160923	0.38908
Aves	Meleagris_gallopavo	65	0.1614	0.390233
Aves	Meleagris_gallopavo	66	0.160038	0.386939
Aves	Meleagris_gallopavo	67	0.162558	0.393032
Aves	Meleagris_gallopavo	68	0.161468	0.390397
Aves	Meleagris_gallopavo	69	0.162081	0.391879
Aves	Meleagris_gallopavo	70	0.162762	0.393526
Aves	Meleagris_gallopavo	71	0.16426	0.397148
Aves	Meleagris_gallopavo	72	0.15963	0.385951
Aves	Meleagris_gallopavo	73	0.16106	0.389409
Aves	Meleagris_gallopavo	74	0.16249	0.392867
Aves	Meleagris_gallopavo	75	0.161264	0.389903
Aves	Meleagris_gallopavo	76	0.160515	0.388092
Aves	Meleagris_gallopavo	77	0.158949	0.384305
Aves	Meleagris_gallopavo	78	0.15711	0.379859
Aves	Meleagris_gallopavo	79	0.154658	0.373932
Aves	Meleagris_gallopavo	80	0.154045	0.37245
Aves	Meleagris_gallopavo	81	0.155748	0.376566
Aves	Meleagris_gallopavo	82	0.155475	0.375908
Aves	Meleagris_gallopavo	83	0.153296	0.370639
Aves	Meleagris_gallopavo	84	0.154522	0.373602
Aves	Meleagris_gallopavo	85	0.15459	0.373767
Aves	Meleagris_gallopavo	86	0.150504	0.363888
Aves	Meleagris_gallopavo	87	0.152751	0.369321
Aves	Meleagris_gallopavo	88	0.150504	0.363888
Aves	Meleagris_gallopavo	89	0.148801	0.359771
Aves	Meleagris_gallopavo	90	0.147031	0.35549
Aves	Meleagris_gallopavo	91	0.150844	0.364711
Aves	Meleagris_gallopavo	92	0.148938	0.360101
Aves	Meleagris_gallopavo	93	0.149006	0.360265
Aves	Meleagris_gallopavo	94	0.149823	0.362241
Aves	Meleagris_gallopavo	95	0.150708	0.364382
Aves	Meleagris_gallopavo	96	0.1503	0.363394
Aves	Meleagris_gallopavo	97	0.152956	0.369815
Aves	Meleagris_gallopavo	98	0.156905	0.379365
Aves	Meleagris_gallopavo	99	0.159221	0.384964
Aves	Meleagris_gallopavo	100	0.303051	0.732715
Aves	Amazona_collaria	1	0.320577	0.756971
Aves	Amazona_collaria	2	0.201043	0.474718
Aves	Amazona_collaria	3	0.202135	0.477296
Aves	Amazona_collaria	4	0.20165	0.47615
Aves	Amazona_collaria	5	0.198314	0.468274
Aves	Amazona_collaria	6	0.198193	0.467988
Aves	Amazona_collaria	7	0.195342	0.461257
Aves	Amazona_collaria	8	0.19607	0.462975
Aves	Amazona_collaria	9	0.198435	0.46856
Aves	Amazona_collaria	10	0.200437	0.473286
Aves	Amazona_collaria	11	0.200982	0.474575
Aves	Amazona_collaria	12	0.202802	0.478871
Aves	Amazona_collaria	13	0.201528	0.475864
Aves	Amazona_collaria	14	0.203348	0.48016
Aves	Amazona_collaria	15	0.201468	0.475721
Aves	Amazona_collaria	16	0.202438	0.478012
Aves	Amazona_collaria	17	0.199527	0.471138
Aves	Amazona_collaria	18	0.19886	0.469563
Aves	Amazona_collaria	19	0.198557	0.468847
Aves	Amazona_collaria	20	0.200133	0.47257
Aves	Amazona_collaria	21	0.199466	0.470995
Aves	Amazona_collaria	22	0.201164	0.475005
Aves	Amazona_collaria	23	0.203651	0.480876
Aves	Amazona_collaria	24	0.204743	0.483453
Aves	Amazona_collaria	25	0.204803	0.483597
Aves	Amazona_collaria	26	0.206077	0.486604
Aves	Amazona_collaria	27	0.206077	0.486604
Aves	Amazona_collaria	28	0.206016	0.486461
Aves	Amazona_collaria	29	0.20735	0.489611
Aves	Amazona_collaria	30	0.205592	0.485458
Aves	Amazona_collaria	31	0.205288	0.484742
Aves	Amazona_collaria	32	0.202681	0.478585
Aves	Amazona_collaria	33	0.203833	0.481305
Aves	Amazona_collaria	34	0.201225	0.475148
Aves	Amazona_collaria	35	0.198981	0.469849
Aves	Amazona_collaria	36	0.200133	0.47257
Aves	Amazona_collaria	37	0.201043	0.474718
Aves	Amazona_collaria	38	0.202135	0.477296
Aves	Amazona_collaria	39	0.201286	0.475291
Aves	Amazona_collaria	40	0.20165	0.47615
Aves	Amazona_collaria	41	0.201832	0.47658
Aves	Amazona_collaria	42	0.200255	0.472856
Aves	Amazona_collaria	43	0.201468	0.475721
Aves	Amazona_collaria	44	0.200255	0.472856
Aves	Amazona_collaria	45	0.202741	0.478728
Aves	Amazona_collaria	46	0.201286	0.475291
Aves	Amazona_collaria	47	0.200497	0.473429
Aves	Amazona_collaria	48	0.200558	0.473572
Aves	Amazona_collaria	49	0.200497	0.473429
Aves	Amazona_collaria	50	0.201346	0.475434
Aves	Amazona_collaria	51	0.200437	0.473286
Aves	Amazona_collaria	52	0.198617	0.46899
Aves	Amazona_collaria	53	0.19516	0.460827
Aves	Amazona_collaria	54	0.197162	0.465553
Aves	Amazona_collaria	55	0.20171	0.476293
Aves	Amazona_collaria	56	0.20359	0.480733
Aves	Amazona_collaria	57	0.202681	0.478585
Aves	Amazona_collaria	58	0.20165	0.47615
Aves	Amazona_collaria	59	0.203469	0.480446
Aves	Amazona_collaria	60	0.203166	0.47973
Aves	Amazona_collaria	61	0.204803	0.483597
Aves	Amazona_collaria	62	0.202013	0.477009
Aves	Amazona_collaria	63	0.200558	0.473572
Aves	Amazona_collaria	64	0.201225	0.475148
Aves	Amazona_collaria	65	0.199224	0.470422
Aves	Amazona_collaria	66	0.198557	0.468847
Aves	Amazona_collaria	67	0.197283	0.46584
Aves	Amazona_collaria	68	0.193402	0.456675
Aves	Amazona_collaria	69	0.191036	0.45109
Aves	Amazona_collaria	70	0.19043	0.449658
Aves	Amazona_collaria	71	0.186791	0.441065
Aves	Amazona_collaria	72	0.181394	0.42832
Aves	Amazona_collaria	73	0.180241	0.425599
Aves	Amazona_collaria	74	0.177452	0.419012
Aves	Amazona_collaria	75	0.17824	0.420874
Aves	Amazona_collaria	76	0.179574	0.424024
Aves	Amazona_collaria	77	0.180302	0.425743
Aves	Amazona_collaria	78	0.177997	0.420301
Aves	Amazona_collaria	79	0.176603	0.417007
Aves	Amazona_collaria	80	0.173388	0.409418
Aves	Amazona_collaria	81	0.172661	0.407699
Aves	Amazona_collaria	82	0.170538	0.402687
Aves	Amazona_collaria	83	0.170174	0.401828
Aves	Amazona_collaria	84	0.171144	0.404119
Aves	Amazona_collaria	85	0.167627	0.395813
Aves	Amazona_collaria	86	0.164898	0.389369
Aves	Amazona_collaria	87	0.167384	0.39524
Aves	Amazona_collaria	88	0.167991	0.396672
Aves	Amazona_collaria	89	0.166838	0.393952
Aves	Amazona_collaria	90	0.167384	0.39524
Aves	Amazona_collaria	91	0.16981	0.400969
Aves	Amazona_collaria	92	0.169628	0.400539
Aves	Amazona_collaria	93	0.169204	0.399537
Aves	Amazona_collaria	94	0.170659	0.402973
Aves	Amazona_collaria	95	0.171205	0.404262
Aves	Amazona_collaria	96	0.173146	0.408845
Aves	Amazona_collaria	97	0.175026	0.413284
Aves	Amazona_collaria	98	0.176542	0.416864
Aves	Amazona_collaria	99	0.18388	0.434192
Aves	Amazona_collaria	100	0.360665	0.851629
Aves	Apteryx_haastii	1	0.32697	0.789972
Aves	Apteryx_haastii	2	0.209159	0.505337
Aves	Apteryx_haastii	3	0.210005	0.507381
Aves	Apteryx_haastii	4	0.207709	0.501834
Aves	Apteryx_haastii	5	0.204447	0.493952
Aves	Apteryx_haastii	6	0.205474	0.496433
Aves	Apteryx_haastii	7	0.206199	0.498185
Aves	Apteryx_haastii	8	0.203178	0.490886
Aves	Apteryx_haastii	9	0.202815	0.490011
Aves	Apteryx_haastii	10	0.20487	0.494973
Aves	Apteryx_haastii	11	0.204084	0.493076
Aves	Apteryx_haastii	12	0.202272	0.488697
Aves	Apteryx_haastii	13	0.200701	0.484902
Aves	Apteryx_haastii	14	0.199915	0.483004
Aves	Apteryx_haastii	15	0.200399	0.484172
Aves	Apteryx_haastii	16	0.199493	0.481982
Aves	Apteryx_haastii	17	0.197378	0.476874
Aves	Apteryx_haastii	18	0.195807	0.473078
Aves	Apteryx_haastii	19	0.19327	0.466948
Aves	Apteryx_haastii	20	0.190913	0.461255
Aves	Apteryx_haastii	21	0.188255	0.454833
Aves	Apteryx_haastii	22	0.188739	0.456
Aves	Apteryx_haastii	23	0.186141	0.449724
Aves	Apteryx_haastii	24	0.185416	0.447972
Aves	Apteryx_haastii	25	0.187107	0.452059
Aves	Apteryx_haastii	26	0.189584	0.458044
Aves	Apteryx_haastii	27	0.191759	0.463299
Aves	Apteryx_haastii	28	0.192786	0.46578
Aves	Apteryx_haastii	29	0.193753	0.468116
Aves	Apteryx_haastii	30	0.193632	0.467824
Aves	Apteryx_haastii	31	0.194418	0.469721
Aves	Apteryx_haastii	32	0.193693	0.46797
Aves	Apteryx_haastii	33	0.193391	0.46724
Aves	Apteryx_haastii	34	0.193451	0.467386
Aves	Apteryx_haastii	35	0.196351	0.474392
Aves	Apteryx_haastii	36	0.196411	0.474538
Aves	Apteryx_haastii	37	0.197438	0.47702
Aves	Apteryx_haastii	38	0.197922	0.478187
Aves	Apteryx_haastii	39	0.198465	0.479501
Aves	Apteryx_haastii	40	0.197801	0.477895
Aves	Apteryx_haastii	41	0.196532	0.47483
Aves	Apteryx_haastii	42	0.194961	0.471035
Aves	Apteryx_haastii	43	0.196713	0.475268
Aves	Apteryx_haastii	44	0.195203	0.471619
Aves	Apteryx_haastii	45	0.19617	0.473954
Aves	Apteryx_haastii	46	0.200459	0.484318
Aves	Apteryx_haastii	47	0.202574	0.489427
Aves	Apteryx_haastii	48	0.20342	0.49147
Aves	Apteryx_haastii	49	0.20197	0.487967
Aves	Apteryx_haastii	50	0.198888	0.480523
Aves	Apteryx_haastii	51	0.196049	0.473662
Aves	Apteryx_haastii	52	0.198526	0.479647
Aves	Apteryx_haastii	53	0.198647	0.479939
Aves	Apteryx_haastii	54	0.200882	0.48534
Aves	Apteryx_haastii	55	0.201426	0.486653
Aves	Apteryx_haastii	56	0.199795	0.482712
Aves	Apteryx_haastii	57	0.198103	0.478625
Aves	Apteryx_haastii	58	0.197922	0.478187
Aves	Apteryx_haastii	59	0.195565	0.472495
Aves	Apteryx_haastii	60	0.193391	0.46724
Aves	Apteryx_haastii	61	0.193995	0.468699
Aves	Apteryx_haastii	62	0.193572	0.467678
Aves	Apteryx_haastii	63	0.195082	0.471327
Aves	Apteryx_haastii	64	0.195626	0.472641
Aves	Apteryx_haastii	65	0.197559	0.477311
Aves	Apteryx_haastii	66	0.195445	0.472203
Aves	Apteryx_haastii	67	0.192243	0.464466
Aves	Apteryx_haastii	68	0.193511	0.467532
Aves	Apteryx_haastii	69	0.191518	0.462715
Aves	Apteryx_haastii	70	0.190913	0.461255
Aves	Apteryx_haastii	71	0.189161	0.457022
Aves	Apteryx_haastii	72	0.189464	0.457752
Aves	Apteryx_haastii	73	0.18898	0.456584
Aves	Apteryx_haastii	74	0.187107	0.452059
Aves	Apteryx_haastii	75	0.184328	0.445345
Aves	Apteryx_haastii	76	0.184268	0.445199
Aves	Apteryx_haastii	77	0.183784	0.444031
Aves	Apteryx_haastii	78	0.184932	0.446804
Aves	Apteryx_haastii	79	0.182395	0.440674
Aves	Apteryx_haastii	80	0.180039	0.434981
Aves	Apteryx_haastii	81	0.180099	0.435127
Aves	Apteryx_haastii	82	0.17871	0.43177
Aves	Apteryx_haastii	83	0.177622	0.429142
Aves	Apteryx_haastii	84	0.177562	0.428996
Aves	Apteryx_haastii	85	0.177682	0.429288
Aves	Apteryx_haastii	86	0.176776	0.427099
Aves	Apteryx_haastii	87	0.178166	0.430456
Aves	Apteryx_haastii	88	0.177743	0.429434
Aves	Apteryx_haastii	89	0.177018	0.427683
Aves	Apteryx_haastii	90	0.178407	0.43104
Aves	Apteryx_haastii	91	0.17877	0.431916
Aves	Apteryx_haastii	92	0.178951	0.432354
Aves	Apteryx_haastii	93	0.17883	0.432062
Aves	Apteryx_haastii	94	0.178468	0.431186
Aves	Apteryx_haastii	95	0.178407	0.43104
Aves	Apteryx_haastii	96	0.177803	0.42958
Aves	Apteryx_haastii	97	0.17726	0.428267
Aves	Apteryx_haastii	98	0.177743	0.429434
Aves	Apteryx_haastii	99	0.184449	0.445637
Aves	Apteryx_haastii	100	0.342859	0.828362
Aves	Gallus_gallus	1	0.641616	1.52042
Aves	Gallus_gallus	2	0.400755	0.949657
Aves	Gallus_gallus	3	0.408127	0.967125
Aves	Gallus_gallus	4	0.412142	0.97664
Aves	Gallus_gallus	5	0.411003	0.973941
Aves	Gallus_gallus	6	0.409265	0.969823
Aves	Gallus_gallus	7	0.404531	0.958604
Aves	Gallus_gallus	8	0.409026	0.969255
Aves	Gallus_gallus	9	0.400036	0.947953
Aves	Gallus_gallus	10	0.402673	0.954201
Aves	Gallus_gallus	11	0.399257	0.946106
Aves	Gallus_gallus	12	0.401414	0.951219
Aves	Gallus_gallus	13	0.403931	0.957184
Aves	Gallus_gallus	14	0.403092	0.955195
Aves	Gallus_gallus	15	0.398238	0.943692
Aves	Gallus_gallus	16	0.393923	0.933467
Aves	Gallus_gallus	17	0.395721	0.937727
Aves	Gallus_gallus	18	0.393024	0.931337
Aves	Gallus_gallus	19	0.391766	0.928354
Aves	Gallus_gallus	20	0.396081	0.938579
Aves	Gallus_gallus	21	0.397339	0.941562
Aves	Gallus_gallus	22	0.393803	0.933183
Aves	Gallus_gallus	23	0.388769	0.921254
Aves	Gallus_gallus	24	0.390927	0.926366
Aves	Gallus_gallus	25	0.390807	0.926082
Aves	Gallus_gallus	26	0.394822	0.935597
Aves	Gallus_gallus	27	0.395301	0.936733
Aves	Gallus_gallus	28	0.397399	0.941704
Aves	Gallus_gallus	29	0.391825	0.928496
Aves	Gallus_gallus	30	0.392365	0.929775
Aves	Gallus_gallus	31	0.399557	0.946816
Aves	Gallus_gallus	32	0.403572	0.956331
Aves	Gallus_gallus	33	0.401474	0.951361
Aves	Gallus_gallus	34	0.395122	0.936307
Aves	Gallus_gallus	35	0.394402	0.934603
Aves	Gallus_gallus	36	0.397819	0.942698
Aves	Gallus_gallus	37	0.404591	0.958746
Aves	Gallus_gallus	38	0.408067	0.966983
Aves	Gallus_gallus	39	0.408127	0.967125
Aves	Gallus_gallus	40	0.406089	0.962296
Aves	Gallus_gallus	41	0.402553	0.953917
Aves	Gallus_gallus	42	0.398598	0.944544
Aves	Gallus_gallus	43	0.400396	0.948805
Aves	Gallus_gallus	44	0.401834	0.952213
Aves	Gallus_gallus	45	0.405789	0.961586
Aves	Gallus_gallus	46	0.406628	0.963574
Aves	Gallus_gallus	47	0.406089	0.962296
Aves	Gallus_gallus	48	0.407048	0.964568
Aves	Gallus_gallus	49	0.411543	0.975219
Aves	Gallus_gallus	50	0.408306	0.967551
Aves	Gallus_gallus	51	0.407587	0.965846
Aves	Gallus_gallus	52	0.401714	0.951929
Aves	Gallus_gallus	53	0.399796	0.947384
Aves	Gallus_gallus	54	0.400216	0.948379
Aves	Gallus_gallus	55	0.404651	0.958888
Aves	Gallus_gallus	56	0.402793	0.954485
Aves	Gallus_gallus	57	0.401954	0.952497
Aves	Gallus_gallus	58	0.399197	0.945964
Aves	Gallus_gallus	59	0.397099	0.940994
Aves	Gallus_gallus	60	0.390147	0.92452
Aves	Gallus_gallus	61	0.384634	0.911455
Aves	Gallus_gallus	62	0.37948	0.899241
Aves	Gallus_gallus	63	0.382356	0.906058
Aves	Gallus_gallus	64	0.381398	0.903786
Aves	Gallus_gallus	65	0.381517	0.90407
Aves	Gallus_gallus	66	0.379779	0.899951
Aves	Gallus_gallus	67	0.379	0.898105
Aves	Gallus_gallus	68	0.374446	0.887312
Aves	Gallus_gallus	69	0.374206	0.886744
Aves	Gallus_gallus	70	0.373607	0.885324
Aves	Gallus_gallus	71	0.37037	0.877655
Aves	Gallus_gallus	72	0.371869	0.881205
Aves	Gallus_gallus	73	0.372887	0.88362
Aves	Gallus_gallus	74	0.37049	0.877939
Aves	Gallus_gallus	75	0.369531	0.875667
Aves	Gallus_gallus	76	0.368632	0.873536
Aves	Gallus_gallus	77	0.367134	0.869986
Aves	Gallus_gallus	78	0.358684	0.849962
Aves	Gallus_gallus	79	0.357725	0.84769
Aves	Gallus_gallus	80	0.354549	0.840163
Aves	Gallus_gallus	81	0.35383	0.838459
Aves	Gallus_gallus	82	0.351193	0.83221
Aves	Gallus_gallus	83	0.351972	0.834056
Aves	Gallus_gallus	84	0.352991	0.83647
Aves	Gallus_gallus	85	0.350473	0.830506
Aves	Gallus_gallus	86	0.343522	0.814032
Aves	Gallus_gallus	87	0.3446	0.816588
Aves	Gallus_gallus	88	0.341664	0.80963
Aves	Gallus_gallus	89	0.342143	0.810766
Aves	Gallus_gallus	90	0.339686	0.804943
Aves	Gallus_gallus	91	0.346398	0.820849
Aves	Gallus_gallus	92	0.345499	0.818719
Aves	Gallus_gallus	93	0.343222	0.813322
Aves	Gallus_gallus	94	0.346278	0.820565
Aves	Gallus_gallus	95	0.343881	0.814884
Aves	Gallus_gallus	96	0.343402	0.813748
Aves	Gallus_gallus	97	0.345739	0.819287
Aves	Gallus_gallus	98	0.349754	0.828802
Aves	Gallus_gallus	99	0.365876	0.867004
Aves	Gallus_gallus	100	0.697471	1.65277
Aves	Corvus_moneduloides	1	0.725636	1.70457
Aves	Corvus_moneduloides	2	0.455963	1.07109
Aves	Corvus_moneduloides	3	0.460465	1.08167
Aves	Corvus_moneduloides	4	0.457549	1.07481
Aves	Corvus_moneduloides	5	0.453237	1.06469
Aves	Corvus_moneduloides	6	0.452413	1.06275
Aves	Corvus_moneduloides	7	0.446452	1.04875
Aves	Corvus_moneduloides	8	0.445374	1.04622
Aves	Corvus_moneduloides	9	0.444233	1.04354
Aves	Corvus_moneduloides	10	0.441633	1.03743
Aves	Corvus_moneduloides	11	0.439921	1.03341
Aves	Corvus_moneduloides	12	0.442584	1.03966
Aves	Corvus_moneduloides	13	0.44176	1.03773
Aves	Corvus_moneduloides	14	0.44195	1.03817
Aves	Corvus_moneduloides	15	0.441507	1.03713
Aves	Corvus_moneduloides	16	0.443345	1.04145
Aves	Corvus_moneduloides	17	0.444867	1.04503
Aves	Corvus_moneduloides	18	0.442521	1.03951
Aves	Corvus_moneduloides	19	0.444296	1.04368
Aves	Corvus_moneduloides	20	0.442965	1.04056
Aves	Corvus_moneduloides	21	0.445501	1.04651
Aves	Corvus_moneduloides	22	0.445945	1.04756
Aves	Corvus_moneduloides	23	0.448545	1.05366
Aves	Corvus_moneduloides	24	0.448355	1.05322
Aves	Corvus_moneduloides	25	0.448989	1.05471
Aves	Corvus_moneduloides	26	0.451018	1.05947
Aves	Corvus_moneduloides	27	0.451018	1.05947
Aves	Corvus_moneduloides	28	0.454378	1.06737
Aves	Corvus_moneduloides	29	0.453871	1.06618
Aves	Corvus_moneduloides	30	0.45051	1.05828
Aves	Corvus_moneduloides	31	0.453998	1.06647
Aves	Corvus_moneduloides	32	0.457295	1.07422
Aves	Corvus_moneduloides	33	0.460529	1.08182
Aves	Corvus_moneduloides	34	0.459768	1.08003
Aves	Corvus_moneduloides	35	0.463699	1.08926
Aves	Corvus_moneduloides	36	0.465918	1.09448
Aves	Corvus_moneduloides	37	0.469406	1.10267
Aves	Corvus_moneduloides	38	0.471562	1.10773
Aves	Corvus_moneduloides	39	0.472006	1.10878
Aves	Corvus_moneduloides	40	0.477522	1.12173
Aves	Corvus_moneduloides	41	0.47321	1.11161
Aves	Corvus_moneduloides	42	0.470167	1.10446
Aves	Corvus_moneduloides	43	0.470737	1.1058
Aves	Corvus_moneduloides	44	0.475493	1.11697
Aves	Corvus_moneduloides	45	0.479297	1.1259
Aves	Corvus_moneduloides	46	0.477585	1.12188
Aves	Corvus_moneduloides	47	0.473591	1.1125
Aves	Corvus_moneduloides	48	0.473274	1.11175
Aves	Corvus_moneduloides	49	0.477332	1.12129
Aves	Corvus_moneduloides	50	0.480756	1.12933
Aves	Corvus_moneduloides	51	0.482404	1.1332
Aves	Corvus_moneduloides	52	0.485702	1.14095
Aves	Corvus_moneduloides	53	0.484433	1.13797
Aves	Corvus_moneduloides	54	0.482848	1.13425
Aves	Corvus_moneduloides	55	0.477585	1.12188
Aves	Corvus_moneduloides	56	0.47264	1.11026
Aves	Corvus_moneduloides	57	0.470864	1.10609
Aves	Corvus_moneduloides	58	0.471879	1.10848
Aves	Corvus_moneduloides	59	0.473591	1.1125
Aves	Corvus_moneduloides	60	0.468518	1.10058
Aves	Corvus_moneduloides	61	0.46744	1.09805
Aves	Corvus_moneduloides	62	0.468455	1.10043
Aves	Corvus_moneduloides	63	0.468582	1.10073
Aves	Corvus_moneduloides	64	0.463572	1.08896
Aves	Corvus_moneduloides	65	0.462368	1.08613
Aves	Corvus_moneduloides	66	0.457739	1.07526
Aves	Corvus_moneduloides	67	0.455393	1.06975
Aves	Corvus_moneduloides	68	0.449179	1.05515
Aves	Corvus_moneduloides	69	0.443219	1.04115
Aves	Corvus_moneduloides	70	0.447023	1.05009
Aves	Corvus_moneduloides	71	0.441443	1.03698
Aves	Corvus_moneduloides	72	0.43878	1.03073
Aves	Corvus_moneduloides	73	0.430854	1.01211
Aves	Corvus_moneduloides	74	0.435166	1.02224
Aves	Corvus_moneduloides	75	0.42762	1.00451
Aves	Corvus_moneduloides	76	0.431044	1.01255
Aves	Corvus_moneduloides	77	0.430727	1.01181
Aves	Corvus_moneduloides	78	0.4332	1.01762
Aves	Corvus_moneduloides	79	0.42743	1.00406
Aves	Corvus_moneduloides	80	0.427874	1.00511
Aves	Corvus_moneduloides	81	0.426162	1.00109
Aves	Corvus_moneduloides	82	0.417285	0.980232
Aves	Corvus_moneduloides	83	0.413037	0.970253
Aves	Corvus_moneduloides	84	0.408661	0.959975
Aves	Corvus_moneduloides	85	0.406062	0.953868
Aves	Corvus_moneduloides	86	0.404857	0.951038
Aves	Corvus_moneduloides	87	0.406189	0.954166
Aves	Corvus_moneduloides	88	0.403779	0.948506
Aves	Corvus_moneduloides	89	0.401813	0.943889
Aves	Corvus_moneduloides	90	0.399975	0.939569
Aves	Corvus_moneduloides	91	0.394775	0.927355
Aves	Corvus_moneduloides	92	0.397629	0.934058
Aves	Corvus_moneduloides	93	0.391605	0.919908
Aves	Corvus_moneduloides	94	0.390717	0.917823
Aves	Corvus_moneduloides	95	0.394775	0.927355
Aves	Corvus_moneduloides	96	0.392366	0.921695
Aves	Corvus_moneduloides	97	0.393761	0.924972
Aves	Corvus_moneduloides	98	0.391034	0.918567
Aves	Corvus_moneduloides	99	0.406379	0.954613
Aves	Corvus_moneduloides	100	0.756452	1.77696
Aves	Calidris_pugnax	1	0.604367	1.42371
Aves	Calidris_pugnax	2	0.379426	0.893819
Aves	Calidris_pugnax	3	0.383279	0.902896
Aves	Calidris_pugnax	4	0.38646	0.910388
Aves	Calidris_pugnax	5	0.383769	0.904048
Aves	Calidris_pugnax	6	0.3812	0.897997
Aves	Calidris_pugnax	7	0.379121	0.893099
Aves	Calidris_pugnax	8	0.370253	0.872209
Aves	Calidris_pugnax	9	0.372515	0.877539
Aves	Calidris_pugnax	10	0.373494	0.879844
Aves	Calidris_pugnax	11	0.372638	0.877827
Aves	Calidris_pugnax	12	0.370681	0.873217
Aves	Calidris_pugnax	13	0.375451	0.884455
Aves	Calidris_pugnax	14	0.369519	0.87048
Aves	Calidris_pugnax	15	0.37013	0.871921
Aves	Calidris_pugnax	16	0.368479	0.868031
Aves	Calidris_pugnax	17	0.36958	0.870624
Aves	Calidris_pugnax	18	0.367378	0.865437
Aves	Calidris_pugnax	19	0.367929	0.866734
Aves	Calidris_pugnax	20	0.366705	0.863853
Aves	Calidris_pugnax	21	0.370253	0.872209
Aves	Calidris_pugnax	22	0.367256	0.865149
Aves	Calidris_pugnax	23	0.369824	0.8712
Aves	Calidris_pugnax	24	0.368173	0.86731
Aves	Calidris_pugnax	25	0.373677	0.880277
Aves	Calidris_pugnax	26	0.373861	0.880709
Aves	Calidris_pugnax	27	0.378325	0.891226
Aves	Calidris_pugnax	28	0.384013	0.904625
Aves	Calidris_pugnax	29	0.382545	0.901167
Aves	Calidris_pugnax	30	0.382117	0.900159
Aves	Calidris_pugnax	31	0.381934	0.899726
Aves	Calidris_pugnax	32	0.383646	0.90376
Aves	Calidris_pugnax	33	0.385726	0.908659
Aves	Calidris_pugnax	34	0.384564	0.905921
Aves	Calidris_pugnax	35	0.384502	0.905777
Aves	Calidris_pugnax	36	0.38334	0.90304
Aves	Calidris_pugnax	37	0.38334	0.90304
Aves	Calidris_pugnax	38	0.379793	0.894684
Aves	Calidris_pugnax	39	0.377469	0.889209
Aves	Calidris_pugnax	40	0.379426	0.893819
Aves	Calidris_pugnax	41	0.375635	0.884887
Aves	Calidris_pugnax	42	0.371965	0.876243
Aves	Calidris_pugnax	43	0.370986	0.873938
Aves	Calidris_pugnax	44	0.37221	0.876819
Aves	Calidris_pugnax	45	0.374167	0.881429
Aves	Calidris_pugnax	46	0.378815	0.892379
Aves	Calidris_pugnax	47	0.381628	0.899006
Aves	Calidris_pugnax	48	0.379304	0.893531
Aves	Calidris_pugnax	49	0.379916	0.894972
Aves	Calidris_pugnax	50	0.375573	0.884743
Aves	Calidris_pugnax	51	0.374289	0.881717
Aves	Calidris_pugnax	52	0.376307	0.886472
Aves	Calidris_pugnax	53	0.374962	0.883302
Aves	Calidris_pugnax	54	0.37753	0.889353
Aves	Calidris_pugnax	55	0.37435	0.881861
Aves	Calidris_pugnax	56	0.370314	0.872353
Aves	Calidris_pugnax	57	0.372454	0.877395
Aves	Calidris_pugnax	58	0.370375	0.872497
Aves	Calidris_pugnax	59	0.37221	0.876819
Aves	Calidris_pugnax	60	0.374167	0.881429
Aves	Calidris_pugnax	61	0.37857	0.891802
Aves	Calidris_pugnax	62	0.378081	0.89065
Aves	Calidris_pugnax	63	0.379121	0.893099
Aves	Calidris_pugnax	64	0.380099	0.895404
Aves	Calidris_pugnax	65	0.378631	0.891946
Aves	Calidris_pugnax	66	0.379182	0.893243
Aves	Calidris_pugnax	67	0.376491	0.886904
Aves	Calidris_pugnax	68	0.369824	0.8712
Aves	Calidris_pugnax	69	0.367134	0.864861
Aves	Calidris_pugnax	70	0.36432	0.858234
Aves	Calidris_pugnax	71	0.362363	0.853623
Aves	Calidris_pugnax	72	0.359244	0.846276
Aves	Calidris_pugnax	73	0.357654	0.84253
Aves	Calidris_pugnax	74	0.355636	0.837776
Aves	Calidris_pugnax	75	0.353189	0.832013
Aves	Calidris_pugnax	76	0.357532	0.842242
Aves	Calidris_pugnax	77	0.357654	0.84253
Aves	Calidris_pugnax	78	0.35692	0.840801
Aves	Calidris_pugnax	79	0.351966	0.829131
Aves	Calidris_pugnax	80	0.350865	0.826538
Aves	Calidris_pugnax	81	0.349765	0.823945
Aves	Calidris_pugnax	82	0.344933	0.812563
Aves	Calidris_pugnax	83	0.341141	0.803631
Aves	Calidris_pugnax	84	0.339368	0.799453
Aves	Calidris_pugnax	85	0.335882	0.791241
Aves	Calidris_pugnax	86	0.332579	0.783461
Aves	Calidris_pugnax	87	0.335209	0.789656
Aves	Calidris_pugnax	88	0.334414	0.787783
Aves	Calidris_pugnax	89	0.32683	0.769918
Aves	Calidris_pugnax	90	0.326402	0.768909
Aves	Calidris_pugnax	91	0.322916	0.760697
Aves	Calidris_pugnax	92	0.327014	0.77035
Aves	Calidris_pugnax	93	0.327319	0.771071
Aves	Calidris_pugnax	94	0.329276	0.775681
Aves	Calidris_pugnax	95	0.329399	0.775969
Aves	Calidris_pugnax	96	0.33001	0.77741
Aves	Calidris_pugnax	97	0.324567	0.764587
Aves	Calidris_pugnax	98	0.325424	0.766604
Aves	Calidris_pugnax	99	0.335025	0.789224
Aves	Calidris_pugnax	100	0.642346	1.51318
Aves	Geospiza_fortis	1	0.396431	0.952959
Aves	Geospiza_fortis	2	0.246017	0.591386
Aves	Geospiza_fortis	3	0.246229	0.591897
Aves	Geospiza_fortis	4	0.244884	0.588662
Aves	Geospiza_fortis	5	0.243184	0.584577
Aves	Geospiza_fortis	6	0.241484	0.580491
Aves	Geospiza_fortis	7	0.243467	0.585258
Aves	Geospiza_fortis	8	0.240068	0.577086
Aves	Geospiza_fortis	9	0.239856	0.576576
Aves	Geospiza_fortis	10	0.240493	0.578108
Aves	Geospiza_fortis	11	0.2446	0.587981
Aves	Geospiza_fortis	12	0.241697	0.581002
Aves	Geospiza_fortis	13	0.242547	0.583045
Aves	Geospiza_fortis	14	0.245308	0.589684
Aves	Geospiza_fortis	15	0.246654	0.592918
Aves	Geospiza_fortis	16	0.245308	0.589684
Aves	Geospiza_fortis	17	0.244884	0.588662
Aves	Geospiza_fortis	18	0.247858	0.595812
Aves	Geospiza_fortis	19	0.24545	0.590024
Aves	Geospiza_fortis	20	0.24545	0.590024
Aves	Geospiza_fortis	21	0.248283	0.596833
Aves	Geospiza_fortis	22	0.24715	0.59411
Aves	Geospiza_fortis	23	0.249062	0.598706
Aves	Geospiza_fortis	24	0.248566	0.597514
Aves	Geospiza_fortis	25	0.250832	0.602962
Aves	Geospiza_fortis	26	0.253169	0.608579
Aves	Geospiza_fortis	27	0.253169	0.608579
Aves	Geospiza_fortis	28	0.252815	0.607728
Aves	Geospiza_fortis	29	0.253098	0.608409
Aves	Geospiza_fortis	30	0.251257	0.603983
Aves	Geospiza_fortis	31	0.250974	0.603302
Aves	Geospiza_fortis	32	0.250266	0.6016
Aves	Geospiza_fortis	33	0.251115	0.603643
Aves	Geospiza_fortis	34	0.253169	0.608579
Aves	Geospiza_fortis	35	0.252036	0.605856
Aves	Geospiza_fortis	36	0.252248	0.606366
Aves	Geospiza_fortis	37	0.253169	0.608579
Aves	Geospiza_fortis	38	0.255506	0.614197
Aves	Geospiza_fortis	39	0.25416	0.610963
Aves	Geospiza_fortis	40	0.255223	0.613516
Aves	Geospiza_fortis	41	0.25239	0.606707
Aves	Geospiza_fortis	42	0.251824	0.605345
Aves	Geospiza_fortis	43	0.253594	0.609601
Aves	Geospiza_fortis	44	0.254656	0.612154
Aves	Geospiza_fortis	45	0.258197	0.620666
Aves	Geospiza_fortis	46	0.259188	0.623049
Aves	Geospiza_fortis	47	0.258622	0.621687
Aves	Geospiza_fortis	48	0.255789	0.614878
Aves	Geospiza_fortis	49	0.257843	0.619815
Aves	Geospiza_fortis	50	0.260322	0.625773
Aves	Geospiza_fortis	51	0.262163	0.630199
Aves	Geospiza_fortis	52	0.261738	0.629177
Aves	Geospiza_fortis	53	0.263013	0.632242
Aves	Geospiza_fortis	54	0.261738	0.629177
Aves	Geospiza_fortis	55	0.260959	0.627305
Aves	Geospiza_fortis	56	0.261596	0.628837
Aves	Geospiza_fortis	57	0.264712	0.636327
Aves	Geospiza_fortis	58	0.259967	0.624922
Aves	Geospiza_fortis	59	0.258622	0.621687
Aves	Geospiza_fortis	60	0.25763	0.619304
Aves	Geospiza_fortis	61	0.257135	0.618112
Aves	Geospiza_fortis	62	0.260322	0.625773
Aves	Geospiza_fortis	63	0.260959	0.627305
Aves	Geospiza_fortis	64	0.262163	0.630199
Aves	Geospiza_fortis	65	0.262092	0.630029
Aves	Geospiza_fortis	66	0.262092	0.630029
Aves	Geospiza_fortis	67	0.2628	0.631731
Aves	Geospiza_fortis	68	0.259684	0.624241
Aves	Geospiza_fortis	69	0.257135	0.618112
Aves	Geospiza_fortis	70	0.256214	0.615899
Aves	Geospiza_fortis	71	0.255789	0.614878
Aves	Geospiza_fortis	72	0.256851	0.617431
Aves	Geospiza_fortis	73	0.256922	0.617602
Aves	Geospiza_fortis	74	0.254515	0.611814
Aves	Geospiza_fortis	75	0.252036	0.605856
Aves	Geospiza_fortis	76	0.252319	0.606537
Aves	Geospiza_fortis	77	0.253523	0.609431
Aves	Geospiza_fortis	78	0.253877	0.610282
Aves	Geospiza_fortis	79	0.249345	0.599387
Aves	Geospiza_fortis	80	0.246512	0.592578
Aves	Geospiza_fortis	81	0.24807	0.596323
Aves	Geospiza_fortis	82	0.243396	0.585087
Aves	Geospiza_fortis	83	0.242476	0.582874
Aves	Geospiza_fortis	84	0.244246	0.58713
Aves	Geospiza_fortis	85	0.242547	0.583045
Aves	Geospiza_fortis	86	0.238298	0.572831
Aves	Geospiza_fortis	87	0.239289	0.575214
Aves	Geospiza_fortis	88	0.240422	0.577938
Aves	Geospiza_fortis	89	0.238014	0.57215
Aves	Geospiza_fortis	90	0.237943	0.57198
Aves	Geospiza_fortis	91	0.233482	0.561255
Aves	Geospiza_fortis	92	0.236527	0.568575
Aves	Geospiza_fortis	93	0.238156	0.57249
Aves	Geospiza_fortis	94	0.241555	0.580661
Aves	Geospiza_fortis	95	0.242617	0.583215
Aves	Geospiza_fortis	96	0.24198	0.581683
Aves	Geospiza_fortis	97	0.244884	0.588662
Aves	Geospiza_fortis	98	0.248354	0.597004
Aves	Geospiza_fortis	99	0.25409	0.610792
Aves	Geospiza_fortis	100	0.467814	1.12455
Aves	Nothoprocta_perdicaria	1	0.282789	0.672826
Aves	Nothoprocta_perdicaria	2	0.16993	0.404307
Aves	Nothoprocta_perdicaria	3	0.171214	0.407361
Aves	Nothoprocta_perdicaria	4	0.1707	0.406139
Aves	Nothoprocta_perdicaria	5	0.169416	0.403085
Aves	Nothoprocta_perdicaria	6	0.168133	0.40003
Aves	Nothoprocta_perdicaria	7	0.165757	0.394378
Aves	Nothoprocta_perdicaria	8	0.165179	0.393004
Aves	Nothoprocta_perdicaria	9	0.166463	0.396058
Aves	Nothoprocta_perdicaria	10	0.165886	0.394684
Aves	Nothoprocta_perdicaria	11	0.164537	0.391476
Aves	Nothoprocta_perdicaria	12	0.164345	0.391018
Aves	Nothoprocta_perdicaria	13	0.16351	0.389032
Aves	Nothoprocta_perdicaria	14	0.163895	0.389949
Aves	Nothoprocta_perdicaria	15	0.162483	0.386589
Aves	Nothoprocta_perdicaria	16	0.160878	0.38277
Aves	Nothoprocta_perdicaria	17	0.162612	0.386894
Aves	Nothoprocta_perdicaria	18	0.161713	0.384756
Aves	Nothoprocta_perdicaria	19	0.16152	0.384297
Aves	Nothoprocta_perdicaria	20	0.162547	0.386741
Aves	Nothoprocta_perdicaria	21	0.16274	0.387199
Aves	Nothoprocta_perdicaria	22	0.160814	0.382617
Aves	Nothoprocta_perdicaria	23	0.15831	0.37666
Aves	Nothoprocta_perdicaria	24	0.159145	0.378646
Aves	Nothoprocta_perdicaria	25	0.159273	0.378951
Aves	Nothoprocta_perdicaria	26	0.157091	0.373758
Aves	Nothoprocta_perdicaria	27	0.157861	0.375591
Aves	Nothoprocta_perdicaria	28	0.156834	0.373147
Aves	Nothoprocta_perdicaria	29	0.157989	0.375897
Aves	Nothoprocta_perdicaria	30	0.161135	0.383381
Aves	Nothoprocta_perdicaria	31	0.162483	0.386589
Aves	Nothoprocta_perdicaria	32	0.161263	0.383686
Aves	Nothoprocta_perdicaria	33	0.162997	0.38781
Aves	Nothoprocta_perdicaria	34	0.163125	0.388116
Aves	Nothoprocta_perdicaria	35	0.162612	0.386894
Aves	Nothoprocta_perdicaria	36	0.161905	0.385214
Aves	Nothoprocta_perdicaria	37	0.162355	0.386283
Aves	Nothoprocta_perdicaria	38	0.15876	0.37773
Aves	Nothoprocta_perdicaria	39	0.159787	0.380173
Aves	Nothoprocta_perdicaria	40	0.159851	0.380326
Aves	Nothoprocta_perdicaria	41	0.158824	0.377882
Aves	Nothoprocta_perdicaria	42	0.159337	0.379104
Aves	Nothoprocta_perdicaria	43	0.160429	0.381701
Aves	Nothoprocta_perdicaria	44	0.161777	0.384908
Aves	Nothoprocta_perdicaria	45	0.162291	0.38613
Aves	Nothoprocta_perdicaria	46	0.162612	0.386894
Aves	Nothoprocta_perdicaria	47	0.161071	0.383228
Aves	Nothoprocta_perdicaria	48	0.161713	0.384756
Aves	Nothoprocta_perdicaria	49	0.161649	0.384603
Aves	Nothoprocta_perdicaria	50	0.160429	0.381701
Aves	Nothoprocta_perdicaria	51	0.16274	0.387199
Aves	Nothoprocta_perdicaria	52	0.161777	0.384908
Aves	Nothoprocta_perdicaria	53	0.160814	0.382617
Aves	Nothoprocta_perdicaria	54	0.160686	0.382312
Aves	Nothoprocta_perdicaria	55	0.161071	0.383228
Aves	Nothoprocta_perdicaria	56	0.15953	0.379562
Aves	Nothoprocta_perdicaria	57	0.160172	0.38109
Aves	Nothoprocta_perdicaria	58	0.159145	0.378646
Aves	Nothoprocta_perdicaria	59	0.156962	0.373453
Aves	Nothoprocta_perdicaria	60	0.155807	0.370703
Aves	Nothoprocta_perdicaria	61	0.158182	0.376355
Aves	Nothoprocta_perdicaria	62	0.157797	0.375438
Aves	Nothoprocta_perdicaria	63	0.157989	0.375897
Aves	Nothoprocta_perdicaria	64	0.15953	0.379562
Aves	Nothoprocta_perdicaria	65	0.160365	0.381548
Aves	Nothoprocta_perdicaria	66	0.159273	0.378951
Aves	Nothoprocta_perdicaria	67	0.160557	0.382006
Aves	Nothoprocta_perdicaria	68	0.159915	0.380479
Aves	Nothoprocta_perdicaria	69	0.162419	0.386436
Aves	Nothoprocta_perdicaria	70	0.162547	0.386741
Aves	Nothoprocta_perdicaria	71	0.160108	0.380937
Aves	Nothoprocta_perdicaria	72	0.159466	0.37941
Aves	Nothoprocta_perdicaria	73	0.159273	0.378951
Aves	Nothoprocta_perdicaria	74	0.158952	0.378188
Aves	Nothoprocta_perdicaria	75	0.161071	0.383228
Aves	Nothoprocta_perdicaria	76	0.159787	0.380173
Aves	Nothoprocta_perdicaria	77	0.162419	0.386436
Aves	Nothoprocta_perdicaria	78	0.160108	0.380937
Aves	Nothoprocta_perdicaria	79	0.155357	0.369634
Aves	Nothoprocta_perdicaria	80	0.153624	0.36551
Aves	Nothoprocta_perdicaria	81	0.152789	0.363525
Aves	Nothoprocta_perdicaria	82	0.153688	0.365663
Aves	Nothoprocta_perdicaria	83	0.152982	0.363983
Aves	Nothoprocta_perdicaria	84	0.152789	0.363525
Aves	Nothoprocta_perdicaria	85	0.153817	0.365968
Aves	Nothoprocta_perdicaria	86	0.153817	0.365968
Aves	Nothoprocta_perdicaria	87	0.152404	0.362608
Aves	Nothoprocta_perdicaria	88	0.153496	0.365205
Aves	Nothoprocta_perdicaria	89	0.154651	0.367954
Aves	Nothoprocta_perdicaria	90	0.153431	0.365052
Aves	Nothoprocta_perdicaria	91	0.155165	0.369176
Aves	Nothoprocta_perdicaria	92	0.155935	0.371009
Aves	Nothoprocta_perdicaria	93	0.156577	0.372536
Aves	Nothoprocta_perdicaria	94	0.158246	0.376508
Aves	Nothoprocta_perdicaria	95	0.161007	0.383075
Aves	Nothoprocta_perdicaria	96	0.160942	0.382923
Aves	Nothoprocta_perdicaria	97	0.164409	0.391171
Aves	Nothoprocta_perdicaria	98	0.165565	0.39392
Aves	Nothoprocta_perdicaria	99	0.170315	0.405223
Aves	Nothoprocta_perdicaria	100	0.300379	0.714677
Aves	Parus_major	1	0.548525	1.3259
Aves	Parus_major	2	0.336967	0.814521
Aves	Parus_major	3	0.340713	0.823575
Aves	Parus_major	4	0.343322	0.82988
Aves	Parus_major	5	0.340245	0.822443
Aves	Parus_major	6	0.341382	0.825192
Aves	Parus_major	7	0.341716	0.826
Aves	Parus_major	8	0.337971	0.816946
Aves	Parus_major	9	0.337101	0.814845
Aves	Parus_major	10	0.340713	0.823575
Aves	Parus_major	11	0.341382	0.825192
Aves	Parus_major	12	0.343188	0.829557
Aves	Parus_major	13	0.345596	0.835377
Aves	Parus_major	14	0.346866	0.838449
Aves	Parus_major	15	0.350545	0.847341
Aves	Parus_major	16	0.35302	0.853323
Aves	Parus_major	17	0.353421	0.854293
Aves	Parus_major	18	0.35302	0.853323
Aves	Parus_major	19	0.353622	0.854778
Aves	Parus_major	20	0.349207	0.844108
Aves	Parus_major	21	0.355361	0.858982
Aves	Parus_major	22	0.35904	0.867874
Aves	Parus_major	23	0.357969	0.865287
Aves	Parus_major	24	0.360177	0.870623
Aves	Parus_major	25	0.364524	0.881132
Aves	Parus_major	26	0.366531	0.885982
Aves	Parus_major	27	0.362049	0.87515
Aves	Parus_major	28	0.367333	0.887922
Aves	Parus_major	29	0.369674	0.893581
Aves	Parus_major	30	0.37362	0.903119
Aves	Parus_major	31	0.378436	0.91476
Aves	Parus_major	32	0.380175	0.918964
Aves	Parus_major	33	0.376831	0.91088
Aves	Parus_major	34	0.381981	0.923329
Aves	Parus_major	35	0.382048	0.923491
Aves	Parus_major	36	0.386128	0.933353
Aves	Parus_major	37	0.390007	0.94273
Aves	Parus_major	38	0.390074	0.942892
Aves	Parus_major	39	0.391546	0.946448
Aves	Parus_major	40	0.389071	0.940466
Aves	Parus_major	41	0.387198	0.93594
Aves	Parus_major	42	0.388068	0.938041
Aves	Parus_major	43	0.387399	0.936425
Aves	Parus_major	44	0.385192	0.931089
Aves	Parus_major	45	0.390342	0.943538
Aves	Parus_major	46	0.390342	0.943538
Aves	Parus_major	47	0.389606	0.94176
Aves	Parus_major	48	0.391011	0.945155
Aves	Parus_major	49	0.39295	0.949844
Aves	Parus_major	50	0.39382	0.951945
Aves	Parus_major	51	0.396963	0.959544
Aves	Parus_major	52	0.396629	0.958736
Aves	Parus_major	53	0.392281	0.948227
Aves	Parus_major	54	0.394087	0.952592
Aves	Parus_major	55	0.392348	0.948389
Aves	Parus_major	56	0.39188	0.947257
Aves	Parus_major	57	0.389004	0.940305
Aves	Parus_major	58	0.389071	0.940466
Aves	Parus_major	59	0.387332	0.936263
Aves	Parus_major	60	0.385794	0.932544
Aves	Parus_major	61	0.385526	0.931898
Aves	Parus_major	62	0.376162	0.909263
Aves	Parus_major	63	0.375293	0.907161
Aves	Parus_major	64	0.372684	0.900856
Aves	Parus_major	65	0.372283	0.899886
Aves	Parus_major	66	0.373286	0.902311
Aves	Parus_major	67	0.371547	0.898107
Aves	Parus_major	68	0.373754	0.903443
Aves	Parus_major	69	0.369474	0.893096
Aves	Parus_major	70	0.369875	0.894066
Aves	Parus_major	71	0.367066	0.887275
Aves	Parus_major	72	0.364859	0.88194
Aves	Parus_major	73	0.368337	0.890347
Aves	Parus_major	74	0.367935	0.889377
Aves	Parus_major	75	0.365795	0.884203
Aves	Parus_major	76	0.366598	0.886143
Aves	Parus_major	77	0.365059	0.882425
Aves	Parus_major	78	0.363387	0.878383
Aves	Parus_major	79	0.357702	0.864641
Aves	Parus_major	80	0.349074	0.843784
Aves	Parus_major	81	0.349542	0.844916
Aves	Parus_major	82	0.347803	0.840713
Aves	Parus_major	83	0.343589	0.830527
Aves	Parus_major	84	0.339375	0.820342
Aves	Parus_major	85	0.333088	0.805144
Aves	Parus_major	86	0.322654	0.779923
Aves	Parus_major	87	0.321383	0.776851
Aves	Parus_major	88	0.320781	0.775396
Aves	Parus_major	89	0.316567	0.76521
Aves	Parus_major	90	0.314828	0.761007
Aves	Parus_major	91	0.317437	0.767312
Aves	Parus_major	92	0.316501	0.765049
Aves	Parus_major	93	0.316768	0.765695
Aves	Parus_major	94	0.313691	0.758258
Aves	Parus_major	95	0.307805	0.744031
Aves	Parus_major	96	0.305531	0.738534
Aves	Parus_major	97	0.302856	0.732067
Aves	Parus_major	98	0.305665	0.738857
Aves	Parus_major	99	0.311819	0.753731
Aves	Parus_major	100	0.588456	1.42242
Aves	Stachyris_ruficeps	1	0.503017	1.19368
Aves	Stachyris_ruficeps	2	0.309524	0.734513
Aves	Stachyris_ruficeps	3	0.313787	0.74463
Aves	Stachyris_ruficeps	4	0.311623	0.739494
Aves	Stachyris_ruficeps	5	0.311951	0.740272
Aves	Stachyris_ruficeps	6	0.312475	0.741517
Aves	Stachyris_ruficeps	7	0.313918	0.744942
Aves	Stachyris_ruficeps	8	0.313918	0.744942
Aves	Stachyris_ruficeps	9	0.314115	0.745409
Aves	Stachyris_ruficeps	10	0.312803	0.742296
Aves	Stachyris_ruficeps	11	0.310376	0.736537
Aves	Stachyris_ruficeps	12	0.312541	0.741673
Aves	Stachyris_ruficeps	13	0.311885	0.740116
Aves	Stachyris_ruficeps	14	0.308737	0.732645
Aves	Stachyris_ruficeps	15	0.308212	0.7314
Aves	Stachyris_ruficeps	16	0.310114	0.735914
Aves	Stachyris_ruficeps	17	0.31241	0.741362
Aves	Stachyris_ruficeps	18	0.313722	0.744475
Aves	Stachyris_ruficeps	19	0.314378	0.746031
Aves	Stachyris_ruficeps	20	0.313984	0.745097
Aves	Stachyris_ruficeps	21	0.313853	0.744786
Aves	Stachyris_ruficeps	22	0.3191	0.757238
Aves	Stachyris_ruficeps	23	0.317591	0.753658
Aves	Stachyris_ruficeps	24	0.319428	0.758016
Aves	Stachyris_ruficeps	25	0.322183	0.764554
Aves	Stachyris_ruficeps	26	0.323954	0.768756
Aves	Stachyris_ruficeps	27	0.32133	0.76253
Aves	Stachyris_ruficeps	28	0.322183	0.764554
Aves	Stachyris_ruficeps	29	0.324151	0.769223
Aves	Stachyris_ruficeps	30	0.325462	0.772336
Aves	Stachyris_ruficeps	31	0.329004	0.780741
Aves	Stachyris_ruficeps	32	0.32966	0.782298
Aves	Stachyris_ruficeps	33	0.332677	0.789458
Aves	Stachyris_ruficeps	34	0.333465	0.791325
Aves	Stachyris_ruficeps	35	0.333465	0.791325
Aves	Stachyris_ruficeps	36	0.33517	0.795372
Aves	Stachyris_ruficeps	37	0.33681	0.799264
Aves	Stachyris_ruficeps	38	0.333989	0.792571
Aves	Stachyris_ruficeps	39	0.333202	0.790703
Aves	Stachyris_ruficeps	40	0.330316	0.783854
Aves	Stachyris_ruficeps	41	0.330513	0.784321
Aves	Stachyris_ruficeps	42	0.330972	0.785411
Aves	Stachyris_ruficeps	43	0.331234	0.786033
Aves	Stachyris_ruficeps	44	0.329463	0.781831
Aves	Stachyris_ruficeps	45	0.328414	0.77934
Aves	Stachyris_ruficeps	46	0.32966	0.782298
Aves	Stachyris_ruficeps	47	0.329332	0.781519
Aves	Stachyris_ruficeps	48	0.330447	0.784165
Aves	Stachyris_ruficeps	49	0.331497	0.786656
Aves	Stachyris_ruficeps	50	0.333399	0.79117
Aves	Stachyris_ruficeps	51	0.332087	0.788057
Aves	Stachyris_ruficeps	52	0.32684	0.775605
Aves	Stachyris_ruficeps	53	0.324019	0.768912
Aves	Stachyris_ruficeps	54	0.33071	0.784788
Aves	Stachyris_ruficeps	55	0.327693	0.777628
Aves	Stachyris_ruficeps	56	0.328611	0.779807
Aves	Stachyris_ruficeps	57	0.328283	0.779029
Aves	Stachyris_ruficeps	58	0.325725	0.772959
Aves	Stachyris_ruficeps	59	0.32625	0.774204
Aves	Stachyris_ruficeps	60	0.323954	0.768756
Aves	Stachyris_ruficeps	61	0.324151	0.769223
Aves	Stachyris_ruficeps	62	0.321855	0.763775
Aves	Stachyris_ruficeps	63	0.323954	0.768756
Aves	Stachyris_ruficeps	64	0.325462	0.772336
Aves	Stachyris_ruficeps	65	0.321527	0.762997
Aves	Stachyris_ruficeps	66	0.317854	0.754281
Aves	Stachyris_ruficeps	67	0.316804	0.75179
Aves	Stachyris_ruficeps	68	0.313656	0.744319
Aves	Stachyris_ruficeps	69	0.313066	0.742918
Aves	Stachyris_ruficeps	70	0.313984	0.745097
Aves	Stachyris_ruficeps	71	0.314443	0.746187
Aves	Stachyris_ruficeps	72	0.308737	0.732645
Aves	Stachyris_ruficeps	73	0.304604	0.722839
Aves	Stachyris_ruficeps	74	0.3008	0.713812
Aves	Stachyris_ruficeps	75	0.298767	0.708986
Aves	Stachyris_ruficeps	76	0.296471	0.703539
Aves	Stachyris_ruficeps	77	0.294963	0.699959
Aves	Stachyris_ruficeps	78	0.294635	0.69918
Aves	Stachyris_ruficeps	79	0.290174	0.688596
Aves	Stachyris_ruficeps	80	0.2825	0.670385
Aves	Stachyris_ruficeps	81	0.284271	0.674588
Aves	Stachyris_ruficeps	82	0.2825	0.670385
Aves	Stachyris_ruficeps	83	0.280336	0.665249
Aves	Stachyris_ruficeps	84	0.27909	0.662291
Aves	Stachyris_ruficeps	85	0.276466	0.656065
Aves	Stachyris_ruficeps	86	0.272006	0.645481
Aves	Stachyris_ruficeps	87	0.270432	0.641746
Aves	Stachyris_ruficeps	88	0.266627	0.632718
Aves	Stachyris_ruficeps	89	0.262757	0.623535
Aves	Stachyris_ruficeps	90	0.264463	0.627581
Aves	Stachyris_ruficeps	91	0.268136	0.636298
Aves	Stachyris_ruficeps	92	0.272006	0.645481
Aves	Stachyris_ruficeps	93	0.273121	0.648127
Aves	Stachyris_ruficeps	94	0.271678	0.644703
Aves	Stachyris_ruficeps	95	0.271284	0.643769
Aves	Stachyris_ruficeps	96	0.270891	0.642835
Aves	Stachyris_ruficeps	97	0.268136	0.636298
Aves	Stachyris_ruficeps	98	0.267742	0.635364
Aves	Stachyris_ruficeps	99	0.276728	0.656688
Aves	Stachyris_ruficeps	100	0.5244	1.24442
Aves	Cairina_moschata	1	0.719354	1.73589
Aves	Cairina_moschata	2	0.446787	1.07815
Aves	Cairina_moschata	3	0.445335	1.07465
Aves	Cairina_moschata	4	0.443189	1.06947
Aves	Cairina_moschata	5	0.438833	1.05896
Aves	Cairina_moschata	6	0.437887	1.05668
Aves	Cairina_moschata	7	0.435299	1.05043
Aves	Cairina_moschata	8	0.430059	1.03779
Aves	Cairina_moschata	9	0.429554	1.03657
Aves	Cairina_moschata	10	0.430817	1.03962
Aves	Cairina_moschata	11	0.436119	1.05241
Aves	Cairina_moschata	12	0.437634	1.05607
Aves	Cairina_moschata	13	0.437697	1.05622
Aves	Cairina_moschata	14	0.438139	1.05729
Aves	Cairina_moschata	15	0.435172	1.05013
Aves	Cairina_moschata	16	0.432774	1.04434
Aves	Cairina_moschata	17	0.437066	1.0547
Aves	Cairina_moschata	18	0.438013	1.05698
Aves	Cairina_moschata	19	0.440664	1.06338
Aves	Cairina_moschata	20	0.435235	1.05028
Aves	Cairina_moschata	21	0.436687	1.05378
Aves	Cairina_moschata	22	0.433342	1.04571
Aves	Cairina_moschata	23	0.433026	1.04495
Aves	Cairina_moschata	24	0.435551	1.05104
Aves	Cairina_moschata	25	0.436309	1.05287
Aves	Cairina_moschata	26	0.438581	1.05835
Aves	Cairina_moschata	27	0.441169	1.0646
Aves	Cairina_moschata	28	0.438518	1.0582
Aves	Cairina_moschata	29	0.43492	1.04952
Aves	Cairina_moschata	30	0.440096	1.06201
Aves	Cairina_moschata	31	0.446661	1.07785
Aves	Cairina_moschata	32	0.444515	1.07267
Aves	Cairina_moschata	33	0.447418	1.07968
Aves	Cairina_moschata	34	0.441358	1.06505
Aves	Cairina_moschata	35	0.435425	1.05074
Aves	Cairina_moschata	36	0.440222	1.06231
Aves	Cairina_moschata	37	0.443315	1.06978
Aves	Cairina_moschata	38	0.441927	1.06643
Aves	Cairina_moschata	39	0.442432	1.06764
Aves	Cairina_moschata	40	0.44281	1.06856
Aves	Cairina_moschata	41	0.445146	1.07419
Aves	Cairina_moschata	42	0.447734	1.08044
Aves	Cairina_moschata	43	0.445461	1.07496
Aves	Cairina_moschata	44	0.44786	1.08074
Aves	Cairina_moschata	45	0.454677	1.09719
Aves	Cairina_moschata	46	0.456129	1.1007
Aves	Cairina_moschata	47	0.458275	1.10588
Aves	Cairina_moschata	48	0.457455	1.1039
Aves	Cairina_moschata	49	0.457139	1.10314
Aves	Cairina_moschata	50	0.456824	1.10237
Aves	Cairina_moschata	51	0.456256	1.101
Aves	Cairina_moschata	52	0.455751	1.09978
Aves	Cairina_moschata	53	0.451395	1.08927
Aves	Cairina_moschata	54	0.458086	1.10542
Aves	Cairina_moschata	55	0.458654	1.10679
Aves	Cairina_moschata	56	0.456634	1.10192
Aves	Cairina_moschata	57	0.455814	1.09994
Aves	Cairina_moschata	58	0.449375	1.0844
Aves	Cairina_moschata	59	0.453352	1.094
Aves	Cairina_moschata	60	0.44887	1.08318
Aves	Cairina_moschata	61	0.444704	1.07313
Aves	Cairina_moschata	62	0.44199	1.06658
Aves	Cairina_moschata	63	0.439528	1.06064
Aves	Cairina_moschata	64	0.437192	1.055
Aves	Cairina_moschata	65	0.438897	1.05911
Aves	Cairina_moschata	66	0.436372	1.05302
Aves	Cairina_moschata	67	0.431637	1.0416
Aves	Cairina_moschata	68	0.427345	1.03124
Aves	Cairina_moschata	69	0.420401	1.01448
Aves	Cairina_moschata	70	0.421159	1.01631
Aves	Cairina_moschata	71	0.42097	1.01585
Aves	Cairina_moschata	72	0.420528	1.01479
Aves	Cairina_moschata	73	0.418318	1.00946
Aves	Cairina_moschata	74	0.416867	1.00595
Aves	Cairina_moschata	75	0.413332	0.997422
Aves	Cairina_moschata	76	0.408976	0.986912
Aves	Cairina_moschata	77	0.401969	0.970003
Aves	Cairina_moschata	78	0.399381	0.963758
Aves	Cairina_moschata	79	0.394332	0.951572
Aves	Cairina_moschata	80	0.393385	0.949287
Aves	Cairina_moschata	81	0.384674	0.928267
Aves	Cairina_moschata	82	0.381581	0.920803
Aves	Cairina_moschata	83	0.380444	0.918061
Aves	Cairina_moschata	84	0.380318	0.917756
Aves	Cairina_moschata	85	0.381517	0.92065
Aves	Cairina_moschata	86	0.379056	0.91471
Aves	Cairina_moschata	87	0.379687	0.916233
Aves	Cairina_moschata	88	0.38076	0.918822
Aves	Cairina_moschata	89	0.3759	0.907093
Aves	Cairina_moschata	90	0.371923	0.897497
Aves	Cairina_moschata	91	0.371733	0.89704
Aves	Cairina_moschata	92	0.366179	0.883635
Aves	Cairina_moschata	93	0.363843	0.877999
Aves	Cairina_moschata	94	0.363464	0.877085
Aves	Cairina_moschata	95	0.364916	0.880589
Aves	Cairina_moschata	96	0.36359	0.87739
Aves	Cairina_moschata	97	0.360561	0.870079
Aves	Cairina_moschata	98	0.365169	0.881198
Aves	Cairina_moschata	99	0.383853	0.926286
Aves	Cairina_moschata	100	0.74151	1.78936
Aves	Zonotrichia_albicollis	1	0.404377	0.973933
Aves	Zonotrichia_albicollis	2	0.254366	0.612635
Aves	Zonotrichia_albicollis	3	0.257193	0.619443
Aves	Zonotrichia_albicollis	4	0.259729	0.625551
Aves	Zonotrichia_albicollis	5	0.260309	0.626948
Aves	Zonotrichia_albicollis	6	0.261686	0.630264
Aves	Zonotrichia_albicollis	7	0.260164	0.626599
Aves	Zonotrichia_albicollis	8	0.261468	0.62974
Aves	Zonotrichia_albicollis	9	0.262483	0.632184
Aves	Zonotrichia_albicollis	10	0.260164	0.626599
Aves	Zonotrichia_albicollis	11	0.262265	0.63166
Aves	Zonotrichia_albicollis	12	0.265599	0.639689
Aves	Zonotrichia_albicollis	13	0.265599	0.639689
Aves	Zonotrichia_albicollis	14	0.264005	0.635849
Aves	Zonotrichia_albicollis	15	0.261903	0.630788
Aves	Zonotrichia_albicollis	16	0.260381	0.627122
Aves	Zonotrichia_albicollis	17	0.261106	0.628868
Aves	Zonotrichia_albicollis	18	0.263787	0.635326
Aves	Zonotrichia_albicollis	19	0.261323	0.629391
Aves	Zonotrichia_albicollis	20	0.26299	0.633406
Aves	Zonotrichia_albicollis	21	0.261831	0.630613
Aves	Zonotrichia_albicollis	22	0.261251	0.629217
Aves	Zonotrichia_albicollis	23	0.264802	0.637769
Aves	Zonotrichia_albicollis	24	0.26915	0.648242
Aves	Zonotrichia_albicollis	25	0.271469	0.653827
Aves	Zonotrichia_albicollis	26	0.273498	0.658714
Aves	Zonotrichia_albicollis	27	0.274005	0.659936
Aves	Zonotrichia_albicollis	28	0.273571	0.658889
Aves	Zonotrichia_albicollis	29	0.272991	0.657492
Aves	Zonotrichia_albicollis	30	0.273788	0.659412
Aves	Zonotrichia_albicollis	31	0.273426	0.65854
Aves	Zonotrichia_albicollis	32	0.274295	0.660634
Aves	Zonotrichia_albicollis	33	0.274875	0.66203
Aves	Zonotrichia_albicollis	34	0.279513	0.673201
Aves	Zonotrichia_albicollis	35	0.277846	0.669186
Aves	Zonotrichia_albicollis	36	0.28118	0.677215
Aves	Zonotrichia_albicollis	37	0.283571	0.682975
Aves	Zonotrichia_albicollis	38	0.280528	0.675644
Aves	Zonotrichia_albicollis	39	0.28118	0.677215
Aves	Zonotrichia_albicollis	40	0.284441	0.68507
Aves	Zonotrichia_albicollis	41	0.281325	0.677564
Aves	Zonotrichia_albicollis	42	0.28002	0.674423
Aves	Zonotrichia_albicollis	43	0.283644	0.68315
Aves	Zonotrichia_albicollis	44	0.284586	0.685419
Aves	Zonotrichia_albicollis	45	0.290528	0.699731
Aves	Zonotrichia_albicollis	46	0.294079	0.708283
Aves	Zonotrichia_albicollis	47	0.292557	0.704618
Aves	Zonotrichia_albicollis	48	0.296036	0.712996
Aves	Zonotrichia_albicollis	49	0.295891	0.712647
Aves	Zonotrichia_albicollis	50	0.297485	0.716487
Aves	Zonotrichia_albicollis	51	0.296253	0.71352
Aves	Zonotrichia_albicollis	52	0.294152	0.708458
Aves	Zonotrichia_albicollis	53	0.297268	0.715963
Aves	Zonotrichia_albicollis	54	0.297051	0.71544
Aves	Zonotrichia_albicollis	55	0.298862	0.719803
Aves	Zonotrichia_albicollis	56	0.296471	0.714043
Aves	Zonotrichia_albicollis	57	0.293355	0.706538
Aves	Zonotrichia_albicollis	58	0.291253	0.701476
Aves	Zonotrichia_albicollis	59	0.290093	0.698684
Aves	Zonotrichia_albicollis	60	0.287847	0.693273
Aves	Zonotrichia_albicollis	61	0.285745	0.688211
Aves	Zonotrichia_albicollis	62	0.285021	0.686466
Aves	Zonotrichia_albicollis	63	0.279803	0.673899
Aves	Zonotrichia_albicollis	64	0.279948	0.674248
Aves	Zonotrichia_albicollis	65	0.280455	0.67547
Aves	Zonotrichia_albicollis	66	0.281107	0.677041
Aves	Zonotrichia_albicollis	67	0.284586	0.685419
Aves	Zonotrichia_albicollis	68	0.285673	0.688037
Aves	Zonotrichia_albicollis	69	0.282049	0.67931
Aves	Zonotrichia_albicollis	70	0.282049	0.67931
Aves	Zonotrichia_albicollis	71	0.281397	0.677739
Aves	Zonotrichia_albicollis	72	0.28118	0.677215
Aves	Zonotrichia_albicollis	73	0.27973	0.673725
Aves	Zonotrichia_albicollis	74	0.272411	0.656096
Aves	Zonotrichia_albicollis	75	0.265961	0.640562
Aves	Zonotrichia_albicollis	76	0.266469	0.641784
Aves	Zonotrichia_albicollis	77	0.265019	0.638293
Aves	Zonotrichia_albicollis	78	0.266251	0.64126
Aves	Zonotrichia_albicollis	79	0.264584	0.637246
Aves	Zonotrichia_albicollis	80	0.259222	0.62433
Aves	Zonotrichia_albicollis	81	0.260599	0.627646
Aves	Zonotrichia_albicollis	82	0.262048	0.631137
Aves	Zonotrichia_albicollis	83	0.257193	0.619443
Aves	Zonotrichia_albicollis	84	0.255816	0.616126
Aves	Zonotrichia_albicollis	85	0.251902	0.606701
Aves	Zonotrichia_albicollis	86	0.246032	0.592563
Aves	Zonotrichia_albicollis	87	0.246685	0.594134
Aves	Zonotrichia_albicollis	88	0.243786	0.587153
Aves	Zonotrichia_albicollis	89	0.242191	0.583313
Aves	Zonotrichia_albicollis	90	0.242264	0.583487
Aves	Zonotrichia_albicollis	91	0.241539	0.581742
Aves	Zonotrichia_albicollis	92	0.242119	0.583138
Aves	Zonotrichia_albicollis	93	0.240959	0.580346
Aves	Zonotrichia_albicollis	94	0.238496	0.574411
Aves	Zonotrichia_albicollis	95	0.237916	0.573015
Aves	Zonotrichia_albicollis	96	0.234147	0.563939
Aves	Zonotrichia_albicollis	97	0.2348	0.56551
Aves	Zonotrichia_albicollis	98	0.238351	0.574062
Aves	Zonotrichia_albicollis	99	0.244076	0.587851
Aves	Zonotrichia_albicollis	100	0.448221	1.07953
Aves	Catharus_ustulatus	1	0.642307	1.51202
Aves	Catharus_ustulatus	2	0.400143	0.941957
Aves	Catharus_ustulatus	3	0.405039	0.953482
Aves	Catharus_ustulatus	4	0.403546	0.949968
Aves	Catharus_ustulatus	5	0.400382	0.942519
Aves	Catharus_ustulatus	6	0.393337	0.925934
Aves	Catharus_ustulatus	7	0.385754	0.908085
Aves	Catharus_ustulatus	8	0.386172	0.909069
Aves	Catharus_ustulatus	9	0.381515	0.898106
Aves	Catharus_ustulatus	10	0.381396	0.897825
Aves	Catharus_ustulatus	11	0.382948	0.901479
Aves	Catharus_ustulatus	12	0.384142	0.90429
Aves	Catharus_ustulatus	13	0.385874	0.908366
Aves	Catharus_ustulatus	14	0.387546	0.912301
Aves	Catharus_ustulatus	15	0.384202	0.90443
Aves	Catharus_ustulatus	16	0.382232	0.899792
Aves	Catharus_ustulatus	17	0.379605	0.893608
Aves	Catharus_ustulatus	18	0.380381	0.895435
Aves	Catharus_ustulatus	19	0.381635	0.898387
Aves	Catharus_ustulatus	20	0.380859	0.89656
Aves	Catharus_ustulatus	21	0.38253	0.900495
Aves	Catharus_ustulatus	22	0.381396	0.897825
Aves	Catharus_ustulatus	23	0.380739	0.896279
Aves	Catharus_ustulatus	24	0.385157	0.906679
Aves	Catharus_ustulatus	25	0.38671	0.910333
Aves	Catharus_ustulatus	26	0.384083	0.904149
Aves	Catharus_ustulatus	27	0.382709	0.900917
Aves	Catharus_ustulatus	28	0.384919	0.906117
Aves	Catharus_ustulatus	29	0.387307	0.911739
Aves	Catharus_ustulatus	30	0.390531	0.919329
Aves	Catharus_ustulatus	31	0.385993	0.908647
Aves	Catharus_ustulatus	32	0.383306	0.902322
Aves	Catharus_ustulatus	33	0.383486	0.902744
Aves	Catharus_ustulatus	34	0.382232	0.899792
Aves	Catharus_ustulatus	35	0.383366	0.902463
Aves	Catharus_ustulatus	36	0.384739	0.905695
Aves	Catharus_ustulatus	37	0.389516	0.916939
Aves	Catharus_ustulatus	38	0.385874	0.908366
Aves	Catharus_ustulatus	39	0.388561	0.91469
Aves	Catharus_ustulatus	40	0.387546	0.912301
Aves	Catharus_ustulatus	41	0.389098	0.915955
Aves	Catharus_ustulatus	42	0.395427	0.930854
Aves	Catharus_ustulatus	43	0.399845	0.941254
Aves	Catharus_ustulatus	44	0.400442	0.94266
Aves	Catharus_ustulatus	45	0.403487	0.949828
Aves	Catharus_ustulatus	46	0.404382	0.951936
Aves	Catharus_ustulatus	47	0.404382	0.951936
Aves	Catharus_ustulatus	48	0.401397	0.944908
Aves	Catharus_ustulatus	49	0.40074	0.943362
Aves	Catharus_ustulatus	50	0.400681	0.943222
Aves	Catharus_ustulatus	51	0.39871	0.938584
Aves	Catharus_ustulatus	52	0.393456	0.926215
Aves	Catharus_ustulatus	53	0.394232	0.928043
Aves	Catharus_ustulatus	54	0.389217	0.916237
Aves	Catharus_ustulatus	55	0.389217	0.916237
Aves	Catharus_ustulatus	56	0.389456	0.916799
Aves	Catharus_ustulatus	57	0.385695	0.907944
Aves	Catharus_ustulatus	58	0.386948	0.910896
Aves	Catharus_ustulatus	59	0.39077	0.919891
Aves	Catharus_ustulatus	60	0.389277	0.916377
Aves	Catharus_ustulatus	61	0.392501	0.923967
Aves	Catharus_ustulatus	62	0.384739	0.905695
Aves	Catharus_ustulatus	63	0.380739	0.896279
Aves	Catharus_ustulatus	64	0.382291	0.899933
Aves	Catharus_ustulatus	65	0.377993	0.889813
Aves	Catharus_ustulatus	66	0.377276	0.888127
Aves	Catharus_ustulatus	67	0.377037	0.887565
Aves	Catharus_ustulatus	68	0.375067	0.882926
Aves	Catharus_ustulatus	69	0.372798	0.877586
Aves	Catharus_ustulatus	70	0.37441	0.88138
Aves	Catharus_ustulatus	71	0.372201	0.87618
Aves	Catharus_ustulatus	72	0.368201	0.866763
Aves	Catharus_ustulatus	73	0.365037	0.859314
Aves	Catharus_ustulatus	74	0.361156	0.850179
Aves	Catharus_ustulatus	75	0.357096	0.840621
Aves	Catharus_ustulatus	76	0.353514	0.832188
Aves	Catharus_ustulatus	77	0.35423	0.833875
Aves	Catharus_ustulatus	78	0.354588	0.834718
Aves	Catharus_ustulatus	79	0.351603	0.827691
Aves	Catharus_ustulatus	80	0.351484	0.82741
Aves	Catharus_ustulatus	81	0.350349	0.824739
Aves	Catharus_ustulatus	82	0.347961	0.819117
Aves	Catharus_ustulatus	83	0.343244	0.808014
Aves	Catharus_ustulatus	84	0.343603	0.808857
Aves	Catharus_ustulatus	85	0.347304	0.817571
Aves	Catharus_ustulatus	86	0.346409	0.815463
Aves	Catharus_ustulatus	87	0.352379	0.829518
Aves	Catharus_ustulatus	88	0.352499	0.829799
Aves	Catharus_ustulatus	89	0.34826	0.81982
Aves	Catharus_ustulatus	90	0.355364	0.836545
Aves	Catharus_ustulatus	91	0.357156	0.840762
Aves	Catharus_ustulatus	92	0.360559	0.848773
Aves	Catharus_ustulatus	93	0.361335	0.8506
Aves	Catharus_ustulatus	94	0.358827	0.844697
Aves	Catharus_ustulatus	95	0.360559	0.848773
Aves	Catharus_ustulatus	96	0.363246	0.855098
Aves	Catharus_ustulatus	97	0.369515	0.869855
Aves	Catharus_ustulatus	98	0.375843	0.884754
Aves	Catharus_ustulatus	99	0.38253	0.900495
Aves	Catharus_ustulatus	100	0.695803	1.63795
Aves	Athene_cunicularia	1	0.280811	0.686245
Aves	Athene_cunicularia	2	0.175889	0.429836
Aves	Athene_cunicularia	3	0.175816	0.429658
Aves	Athene_cunicularia	4	0.174289	0.425927
Aves	Athene_cunicularia	5	0.172617	0.42184
Aves	Athene_cunicularia	6	0.170217	0.415976
Aves	Athene_cunicularia	7	0.170072	0.415621
Aves	Athene_cunicularia	8	0.169781	0.41491
Aves	Athene_cunicularia	9	0.1676	0.409579
Aves	Athene_cunicularia	10	0.167309	0.408868
Aves	Athene_cunicularia	11	0.168472	0.411711
Aves	Athene_cunicularia	12	0.167164	0.408513
Aves	Athene_cunicularia	13	0.165128	0.403538
Aves	Athene_cunicularia	14	0.165855	0.405315
Aves	Athene_cunicularia	15	0.168036	0.410645
Aves	Athene_cunicularia	16	0.171163	0.418286
Aves	Athene_cunicularia	17	0.170872	0.417575
Aves	Athene_cunicularia	18	0.172617	0.42184
Aves	Athene_cunicularia	19	0.17618	0.430547
Aves	Athene_cunicularia	20	0.173998	0.425216
Aves	Athene_cunicularia	21	0.175889	0.429836
Aves	Athene_cunicularia	22	0.173271	0.423439
Aves	Athene_cunicularia	23	0.174653	0.426815
Aves	Athene_cunicularia	24	0.173926	0.425038
Aves	Athene_cunicularia	25	0.173926	0.425038
Aves	Athene_cunicularia	26	0.170872	0.417575
Aves	Athene_cunicularia	27	0.173708	0.424505
Aves	Athene_cunicularia	28	0.176107	0.430369
Aves	Athene_cunicularia	29	0.174871	0.427348
Aves	Athene_cunicularia	30	0.177998	0.434989
Aves	Athene_cunicularia	31	0.176398	0.43108
Aves	Athene_cunicularia	32	0.180906	0.442097
Aves	Athene_cunicularia	33	0.180252	0.440498
Aves	Athene_cunicularia	34	0.178652	0.436588
Aves	Athene_cunicularia	35	0.176907	0.432324
Aves	Athene_cunicularia	36	0.18156	0.443696
Aves	Athene_cunicularia	37	0.180179	0.44032
Aves	Athene_cunicularia	38	0.178288	0.4357
Aves	Athene_cunicularia	39	0.176398	0.43108
Aves	Athene_cunicularia	40	0.174217	0.425749
Aves	Athene_cunicularia	41	0.175525	0.428948
Aves	Athene_cunicularia	42	0.175089	0.427881
Aves	Athene_cunicularia	43	0.17458	0.426638
Aves	Athene_cunicularia	44	0.174289	0.425927
Aves	Athene_cunicularia	45	0.176689	0.431791
Aves	Athene_cunicularia	46	0.179161	0.437832
Aves	Athene_cunicularia	47	0.181415	0.443341
Aves	Athene_cunicularia	48	0.180033	0.439964
Aves	Athene_cunicularia	49	0.178579	0.436411
Aves	Athene_cunicularia	50	0.177925	0.434811
Aves	Athene_cunicularia	51	0.175671	0.429303
Aves	Athene_cunicularia	52	0.171744	0.419708
Aves	Athene_cunicularia	53	0.17458	0.426638
Aves	Athene_cunicularia	54	0.171817	0.419885
Aves	Athene_cunicularia	55	0.176471	0.431258
Aves	Athene_cunicularia	56	0.176689	0.431791
Aves	Athene_cunicularia	57	0.176034	0.430191
Aves	Athene_cunicularia	58	0.174144	0.425571
Aves	Athene_cunicularia	59	0.174507	0.42646
Aves	Athene_cunicularia	60	0.172326	0.421129
Aves	Athene_cunicularia	61	0.173053	0.422906
Aves	Athene_cunicularia	62	0.173562	0.42415
Aves	Athene_cunicularia	63	0.171017	0.417931
Aves	Athene_cunicularia	64	0.172471	0.421485
Aves	Athene_cunicularia	65	0.171017	0.417931
Aves	Athene_cunicularia	66	0.171235	0.418464
Aves	Athene_cunicularia	67	0.170945	0.417753
Aves	Athene_cunicularia	68	0.170799	0.417398
Aves	Athene_cunicularia	69	0.170654	0.417042
Aves	Athene_cunicularia	70	0.16949	0.414199
Aves	Athene_cunicularia	71	0.166146	0.406025
Aves	Athene_cunicularia	72	0.166291	0.406381
Aves	Athene_cunicularia	73	0.167164	0.408513
Aves	Athene_cunicularia	74	0.168836	0.4126
Aves	Athene_cunicularia	75	0.168109	0.410823
Aves	Athene_cunicularia	76	0.168327	0.411356
Aves	Athene_cunicularia	77	0.168472	0.411711
Aves	Athene_cunicularia	78	0.165055	0.40336
Aves	Athene_cunicularia	79	0.164328	0.401583
Aves	Athene_cunicularia	80	0.164255	0.401405
Aves	Athene_cunicularia	81	0.163964	0.400695
Aves	Athene_cunicularia	82	0.16411	0.40105
Aves	Athene_cunicularia	83	0.162655	0.397496
Aves	Athene_cunicularia	84	0.162874	0.398029
Aves	Athene_cunicularia	85	0.162219	0.39643
Aves	Athene_cunicularia	86	0.161492	0.394653
Aves	Athene_cunicularia	87	0.161565	0.394831
Aves	Athene_cunicularia	88	0.161856	0.395542
Aves	Athene_cunicularia	89	0.160983	0.393409
Aves	Athene_cunicularia	90	0.160329	0.39181
Aves	Athene_cunicularia	91	0.162437	0.396963
Aves	Athene_cunicularia	92	0.163601	0.399806
Aves	Athene_cunicularia	93	0.166	0.40567
Aves	Athene_cunicularia	94	0.166436	0.406736
Aves	Athene_cunicularia	95	0.165782	0.405137
Aves	Athene_cunicularia	96	0.165927	0.405492
Aves	Athene_cunicularia	97	0.168545	0.411889
Aves	Athene_cunicularia	98	0.171017	0.417931
Aves	Athene_cunicularia	99	0.178652	0.436588
Aves	Athene_cunicularia	100	0.321166	0.784864
Aves	Anas_platyrhynchos	1	0.395745	0.955445
Aves	Anas_platyrhynchos	2	0.250686	0.605228
Aves	Anas_platyrhynchos	3	0.248907	0.600934
Aves	Anas_platyrhynchos	4	0.246312	0.59467
Aves	Anas_platyrhynchos	5	0.243866	0.588765
Aves	Anas_platyrhynchos	6	0.244608	0.590554
Aves	Anas_platyrhynchos	7	0.245719	0.593238
Aves	Anas_platyrhynchos	8	0.245423	0.592523
Aves	Anas_platyrhynchos	9	0.247498	0.597533
Aves	Anas_platyrhynchos	10	0.249203	0.601649
Aves	Anas_platyrhynchos	11	0.252316	0.609166
Aves	Anas_platyrhynchos	12	0.258394	0.62384
Aves	Anas_platyrhynchos	13	0.256393	0.619008
Aves	Anas_platyrhynchos	14	0.254466	0.614355
Aves	Anas_platyrhynchos	15	0.256764	0.619903
Aves	Anas_platyrhynchos	16	0.248091	0.598965
Aves	Anas_platyrhynchos	17	0.248017	0.598786
Aves	Anas_platyrhynchos	18	0.25113	0.606302
Aves	Anas_platyrhynchos	19	0.252613	0.609881
Aves	Anas_platyrhynchos	20	0.256912	0.620261
Aves	Anas_platyrhynchos	21	0.254318	0.613997
Aves	Anas_platyrhynchos	22	0.256023	0.618113
Aves	Anas_platyrhynchos	23	0.253947	0.613103
Aves	Anas_platyrhynchos	24	0.256912	0.620261
Aves	Anas_platyrhynchos	25	0.259432	0.626345
Aves	Anas_platyrhynchos	26	0.264176	0.637798
Aves	Anas_platyrhynchos	27	0.269513	0.650683
Aves	Anas_platyrhynchos	28	0.271885	0.65641
Aves	Anas_platyrhynchos	29	0.273886	0.661242
Aves	Anas_platyrhynchos	30	0.280039	0.676095
Aves	Anas_platyrhynchos	31	0.281076	0.6786
Aves	Anas_platyrhynchos	32	0.279742	0.675379
Aves	Anas_platyrhynchos	33	0.277667	0.670368
Aves	Anas_platyrhynchos	34	0.279075	0.673769
Aves	Anas_platyrhynchos	35	0.278185	0.671621
Aves	Anas_platyrhynchos	36	0.278037	0.671263
Aves	Anas_platyrhynchos	37	0.277592	0.670189
Aves	Anas_platyrhynchos	38	0.273293	0.65981
Aves	Anas_platyrhynchos	39	0.275443	0.665
Aves	Anas_platyrhynchos	40	0.274553	0.662852
Aves	Anas_platyrhynchos	41	0.269513	0.650683
Aves	Anas_platyrhynchos	42	0.26173	0.631893
Aves	Anas_platyrhynchos	43	0.259877	0.627419
Aves	Anas_platyrhynchos	44	0.260989	0.630103
Aves	Anas_platyrhynchos	45	0.265288	0.640483
Aves	Anas_platyrhynchos	46	0.261359	0.630998
Aves	Anas_platyrhynchos	47	0.261582	0.631535
Aves	Anas_platyrhynchos	48	0.265066	0.639946
Aves	Anas_platyrhynchos	49	0.263583	0.636367
Aves	Anas_platyrhynchos	50	0.26388	0.637083
Aves	Anas_platyrhynchos	51	0.262249	0.633146
Aves	Anas_platyrhynchos	52	0.261063	0.630282
Aves	Anas_platyrhynchos	53	0.26262	0.63404
Aves	Anas_platyrhynchos	54	0.26173	0.631893
Aves	Anas_platyrhynchos	55	0.261285	0.630819
Aves	Anas_platyrhynchos	56	0.259729	0.627061
Aves	Anas_platyrhynchos	57	0.259803	0.62724
Aves	Anas_platyrhynchos	58	0.257801	0.622408
Aves	Anas_platyrhynchos	59	0.259284	0.625987
Aves	Anas_platyrhynchos	60	0.259358	0.626166
Aves	Anas_platyrhynchos	61	0.259803	0.62724
Aves	Anas_platyrhynchos	62	0.25921	0.625808
Aves	Anas_platyrhynchos	63	0.257653	0.62205
Aves	Anas_platyrhynchos	64	0.255726	0.617397
Aves	Anas_platyrhynchos	65	0.251279	0.60666
Aves	Anas_platyrhynchos	66	0.250241	0.604155
Aves	Anas_platyrhynchos	67	0.247054	0.59646
Aves	Anas_platyrhynchos	68	0.243718	0.588407
Aves	Anas_platyrhynchos	69	0.238159	0.574985
Aves	Anas_platyrhynchos	70	0.239493	0.578206
Aves	Anas_platyrhynchos	71	0.241717	0.583575
Aves	Anas_platyrhynchos	72	0.237343	0.573016
Aves	Anas_platyrhynchos	73	0.24016	0.579817
Aves	Anas_platyrhynchos	74	0.241865	0.583933
Aves	Anas_platyrhynchos	75	0.238011	0.574627
Aves	Anas_platyrhynchos	76	0.237343	0.573016
Aves	Anas_platyrhynchos	77	0.239048	0.577132
Aves	Anas_platyrhynchos	78	0.236454	0.570869
Aves	Anas_platyrhynchos	79	0.230153	0.555658
Aves	Anas_platyrhynchos	80	0.227781	0.549931
Aves	Anas_platyrhynchos	81	0.22578	0.545099
Aves	Anas_platyrhynchos	82	0.223186	0.538836
Aves	Anas_platyrhynchos	83	0.222519	0.537225
Aves	Anas_platyrhynchos	84	0.222519	0.537225
Aves	Anas_platyrhynchos	85	0.222741	0.537762
Aves	Anas_platyrhynchos	86	0.223556	0.539731
Aves	Anas_platyrhynchos	87	0.223927	0.540625
Aves	Anas_platyrhynchos	88	0.222889	0.53812
Aves	Anas_platyrhynchos	89	0.216811	0.523446
Aves	Anas_platyrhynchos	90	0.212809	0.513782
Aves	Anas_platyrhynchos	91	0.209695	0.506266
Aves	Anas_platyrhynchos	92	0.208954	0.504476
Aves	Anas_platyrhynchos	93	0.207546	0.501076
Aves	Anas_platyrhynchos	94	0.206879	0.499466
Aves	Anas_platyrhynchos	95	0.20547	0.496065
Aves	Anas_platyrhynchos	96	0.199096	0.480675
Aves	Anas_platyrhynchos	97	0.197687	0.477275
Aves	Anas_platyrhynchos	98	0.196798	0.475128
Aves	Anas_platyrhynchos	99	0.200133	0.483181
Aves	Anas_platyrhynchos	100	0.366244	0.884221
Aves	Serinus_canaria	1	0.447613	1.0542
Aves	Serinus_canaria	2	0.287846	0.677922
Aves	Serinus_canaria	3	0.287186	0.676367
Aves	Serinus_canaria	4	0.283687	0.668127
Aves	Serinus_canaria	5	0.284545	0.670148
Aves	Serinus_canaria	6	0.286327	0.674346
Aves	Serinus_canaria	7	0.279395	0.65802
Aves	Serinus_canaria	8	0.272595	0.642005
Aves	Serinus_canaria	9	0.270879	0.637962
Aves	Serinus_canaria	10	0.267578	0.630188
Aves	Serinus_canaria	11	0.264739	0.623502
Aves	Serinus_canaria	12	0.263881	0.621481
Aves	Serinus_canaria	13	0.264145	0.622102
Aves	Serinus_canaria	14	0.263683	0.621014
Aves	Serinus_canaria	15	0.266587	0.627855
Aves	Serinus_canaria	16	0.265861	0.626145
Aves	Serinus_canaria	17	0.266786	0.628322
Aves	Serinus_canaria	18	0.271275	0.638895
Aves	Serinus_canaria	19	0.27484	0.647291
Aves	Serinus_canaria	20	0.274708	0.64698
Aves	Serinus_canaria	21	0.271077	0.638429
Aves	Serinus_canaria	22	0.27352	0.644182
Aves	Serinus_canaria	23	0.269096	0.633764
Aves	Serinus_canaria	24	0.268964	0.633453
Aves	Serinus_canaria	25	0.273453	0.644026
Aves	Serinus_canaria	26	0.278075	0.65491
Aves	Serinus_canaria	27	0.276953	0.652267
Aves	Serinus_canaria	28	0.277151	0.652733
Aves	Serinus_canaria	29	0.273652	0.644493
Aves	Serinus_canaria	30	0.272859	0.642627
Aves	Serinus_canaria	31	0.2755	0.648846
Aves	Serinus_canaria	32	0.277283	0.653044
Aves	Serinus_canaria	33	0.278801	0.656621
Aves	Serinus_canaria	34	0.278075	0.65491
Aves	Serinus_canaria	35	0.282102	0.664395
Aves	Serinus_canaria	36	0.279725	0.658797
Aves	Serinus_canaria	37	0.277415	0.653355
Aves	Serinus_canaria	38	0.27649	0.651179
Aves	Serinus_canaria	39	0.278999	0.657087
Aves	Serinus_canaria	40	0.279131	0.657398
Aves	Serinus_canaria	41	0.277679	0.653977
Aves	Serinus_canaria	42	0.277019	0.652422
Aves	Serinus_canaria	43	0.28263	0.665639
Aves	Serinus_canaria	44	0.282696	0.665794
Aves	Serinus_canaria	45	0.283554	0.667816
Aves	Serinus_canaria	46	0.280121	0.65973
Aves	Serinus_canaria	47	0.281178	0.662218
Aves	Serinus_canaria	48	0.279923	0.659264
Aves	Serinus_canaria	49	0.282564	0.665483
Aves	Serinus_canaria	50	0.282234	0.664706
Aves	Serinus_canaria	51	0.283422	0.667505
Aves	Serinus_canaria	52	0.280914	0.661596
Aves	Serinus_canaria	53	0.283554	0.667816
Aves	Serinus_canaria	54	0.284149	0.669215
Aves	Serinus_canaria	55	0.281706	0.663462
Aves	Serinus_canaria	56	0.281178	0.662218
Aves	Serinus_canaria	57	0.282894	0.666261
Aves	Serinus_canaria	58	0.282498	0.665328
Aves	Serinus_canaria	59	0.280584	0.660819
Aves	Serinus_canaria	60	0.281178	0.662218
Aves	Serinus_canaria	61	0.279197	0.657553
Aves	Serinus_canaria	62	0.273784	0.644804
Aves	Serinus_canaria	63	0.272001	0.640605
Aves	Serinus_canaria	64	0.273916	0.645115
Aves	Serinus_canaria	65	0.276226	0.650557
Aves	Serinus_canaria	66	0.27484	0.647291
Aves	Serinus_canaria	67	0.274642	0.646825
Aves	Serinus_canaria	68	0.271935	0.64045
Aves	Serinus_canaria	69	0.272661	0.64216
Aves	Serinus_canaria	70	0.272793	0.642471
Aves	Serinus_canaria	71	0.273057	0.643093
Aves	Serinus_canaria	72	0.273255	0.64356
Aves	Serinus_canaria	73	0.269888	0.63563
Aves	Serinus_canaria	74	0.266984	0.628788
Aves	Serinus_canaria	75	0.264805	0.623657
Aves	Serinus_canaria	76	0.265333	0.624901
Aves	Serinus_canaria	77	0.263617	0.620859
Aves	Serinus_canaria	78	0.263617	0.620859
Aves	Serinus_canaria	79	0.261834	0.61666
Aves	Serinus_canaria	80	0.258533	0.608886
Aves	Serinus_canaria	81	0.259655	0.611529
Aves	Serinus_canaria	82	0.254572	0.599557
Aves	Serinus_canaria	83	0.254638	0.599712
Aves	Serinus_canaria	84	0.252261	0.594115
Aves	Serinus_canaria	85	0.252525	0.594737
Aves	Serinus_canaria	86	0.249884	0.588517
Aves	Serinus_canaria	87	0.248432	0.585097
Aves	Serinus_canaria	88	0.246914	0.58152
Aves	Serinus_canaria	89	0.244735	0.576389
Aves	Serinus_canaria	90	0.243282	0.572969
Aves	Serinus_canaria	91	0.248234	0.58463
Aves	Serinus_canaria	92	0.251799	0.593026
Aves	Serinus_canaria	93	0.252723	0.595203
Aves	Serinus_canaria	94	0.25609	0.603133
Aves	Serinus_canaria	95	0.256552	0.604222
Aves	Serinus_canaria	96	0.258995	0.609975
Aves	Serinus_canaria	97	0.259589	0.611374
Aves	Serinus_canaria	98	0.261438	0.615728
Aves	Serinus_canaria	99	0.272793	0.642471
Aves	Serinus_canaria	100	0.498647	1.17439
Aves	Pavo_cristatus	1	0.344543	0.813946
Aves	Pavo_cristatus	2	0.209465	0.494839
Aves	Pavo_cristatus	3	0.211359	0.499312
Aves	Pavo_cristatus	4	0.212472	0.501942
Aves	Pavo_cristatus	5	0.211303	0.49918
Aves	Pavo_cristatus	6	0.210523	0.497338
Aves	Pavo_cristatus	7	0.208408	0.49234
Aves	Pavo_cristatus	8	0.21069	0.497733
Aves	Pavo_cristatus	9	0.208408	0.49234
Aves	Pavo_cristatus	10	0.209967	0.496023
Aves	Pavo_cristatus	11	0.216258	0.510887
Aves	Pavo_cristatus	12	0.215145	0.508256
Aves	Pavo_cristatus	13	0.215535	0.509177
Aves	Pavo_cristatus	14	0.215924	0.510098
Aves	Pavo_cristatus	15	0.214365	0.506414
Aves	Pavo_cristatus	16	0.213697	0.504836
Aves	Pavo_cristatus	17	0.215757	0.509703
Aves	Pavo_cristatus	18	0.215312	0.508651
Aves	Pavo_cristatus	19	0.214254	0.506151
Aves	Pavo_cristatus	20	0.212918	0.502995
Aves	Pavo_cristatus	21	0.211192	0.498917
Aves	Pavo_cristatus	22	0.21108	0.498654
Aves	Pavo_cristatus	23	0.21069	0.497733
Aves	Pavo_cristatus	24	0.2098	0.495629
Aves	Pavo_cristatus	25	0.21069	0.497733
Aves	Pavo_cristatus	26	0.209465	0.494839
Aves	Pavo_cristatus	27	0.210523	0.497338
Aves	Pavo_cristatus	28	0.209131	0.49405
Aves	Pavo_cristatus	29	0.207183	0.489446
Aves	Pavo_cristatus	30	0.208241	0.491946
Aves	Pavo_cristatus	31	0.208241	0.491946
Aves	Pavo_cristatus	32	0.206514	0.487868
Aves	Pavo_cristatus	33	0.2049	0.484053
Aves	Pavo_cristatus	34	0.205122	0.484579
Aves	Pavo_cristatus	35	0.204788	0.48379
Aves	Pavo_cristatus	36	0.207294	0.489709
Aves	Pavo_cristatus	37	0.206793	0.488526
Aves	Pavo_cristatus	38	0.204232	0.482475
Aves	Pavo_cristatus	39	0.204844	0.483922
Aves	Pavo_cristatus	40	0.205568	0.485632
Aves	Pavo_cristatus	41	0.203786	0.481423
Aves	Pavo_cristatus	42	0.20451	0.483133
Aves	Pavo_cristatus	43	0.205735	0.486026
Aves	Pavo_cristatus	44	0.201336	0.475635
Aves	Pavo_cristatus	45	0.201726	0.476556
Aves	Pavo_cristatus	46	0.20529	0.484974
Aves	Pavo_cristatus	47	0.205011	0.484316
Aves	Pavo_cristatus	48	0.20284	0.479186
Aves	Pavo_cristatus	49	0.206459	0.487736
Aves	Pavo_cristatus	50	0.202283	0.477871
Aves	Pavo_cristatus	51	0.203229	0.480107
Aves	Pavo_cristatus	52	0.202673	0.478792
Aves	Pavo_cristatus	53	0.202339	0.478003
Aves	Pavo_cristatus	54	0.20245	0.478266
Aves	Pavo_cristatus	55	0.203731	0.481291
Aves	Pavo_cristatus	56	0.203619	0.481028
Aves	Pavo_cristatus	57	0.203953	0.481817
Aves	Pavo_cristatus	58	0.201893	0.47695
Aves	Pavo_cristatus	59	0.201837	0.476819
Aves	Pavo_cristatus	60	0.202617	0.47866
Aves	Pavo_cristatus	61	0.201615	0.476293
Aves	Pavo_cristatus	62	0.198218	0.468269
Aves	Pavo_cristatus	63	0.200445	0.47353
Aves	Pavo_cristatus	64	0.199276	0.470768
Aves	Pavo_cristatus	65	0.201281	0.475503
Aves	Pavo_cristatus	66	0.199276	0.470768
Aves	Pavo_cristatus	67	0.197216	0.465901
Aves	Pavo_cristatus	68	0.19755	0.466691
Aves	Pavo_cristatus	69	0.199109	0.470374
Aves	Pavo_cristatus	70	0.198552	0.469058
Aves	Pavo_cristatus	71	0.194098	0.458535
Aves	Pavo_cristatus	72	0.191258	0.451827
Aves	Pavo_cristatus	73	0.190312	0.449591
Aves	Pavo_cristatus	74	0.189699	0.448144
Aves	Pavo_cristatus	75	0.19098	0.451169
Aves	Pavo_cristatus	76	0.19059	0.450249
Aves	Pavo_cristatus	77	0.190479	0.449985
Aves	Pavo_cristatus	78	0.189699	0.448144
Aves	Pavo_cristatus	79	0.186693	0.441041
Aves	Pavo_cristatus	80	0.184521	0.435911
Aves	Pavo_cristatus	81	0.183018	0.43236
Aves	Pavo_cristatus	82	0.183241	0.432886
Aves	Pavo_cristatus	83	0.181459	0.428677
Aves	Pavo_cristatus	84	0.183129	0.432623
Aves	Pavo_cristatus	85	0.180122	0.42552
Aves	Pavo_cristatus	86	0.176559	0.417101
Aves	Pavo_cristatus	87	0.181236	0.42815
Aves	Pavo_cristatus	88	0.180958	0.427493
Aves	Pavo_cristatus	89	0.181403	0.428545
Aves	Pavo_cristatus	90	0.179009	0.422889
Aves	Pavo_cristatus	91	0.178229	0.421047
Aves	Pavo_cristatus	92	0.178675	0.4221
Aves	Pavo_cristatus	93	0.181125	0.427887
Aves	Pavo_cristatus	94	0.181514	0.428808
Aves	Pavo_cristatus	95	0.181904	0.429729
Aves	Pavo_cristatus	96	0.182851	0.431965
Aves	Pavo_cristatus	97	0.185134	0.437358
Aves	Pavo_cristatus	98	0.18608	0.439594
Aves	Pavo_cristatus	99	0.194543	0.459588
[truncated: 8,501 more rows]

## Sheet: G4 density in introns
clade	species	bin_num	count	normalized_density
Amphibians	Xenopus_tropicalis	1	0.058578	0.14382
Amphibians	Xenopus_tropicalis	2	0.0505731	0.124167
Amphibians	Xenopus_tropicalis	3	0.0521971	0.128154
Amphibians	Xenopus_tropicalis	4	0.0531345	0.130455
Amphibians	Xenopus_tropicalis	5	0.054313	0.133349
Amphibians	Xenopus_tropicalis	6	0.0547214	0.134352
Amphibians	Xenopus_tropicalis	7	0.0557892	0.136973
Amphibians	Xenopus_tropicalis	8	0.0563707	0.138401
Amphibians	Xenopus_tropicalis	9	0.0572342	0.140521
Amphibians	Xenopus_tropicalis	10	0.0573217	0.140736
Amphibians	Xenopus_tropicalis	11	0.0576328	0.1415
Amphibians	Xenopus_tropicalis	12	0.0573392	0.140779
Amphibians	Xenopus_tropicalis	13	0.0574092	0.140951
Amphibians	Xenopus_tropicalis	14	0.0582318	0.14297
Amphibians	Xenopus_tropicalis	15	0.0587667	0.144284
Amphibians	Xenopus_tropicalis	16	0.0600814	0.147511
Amphibians	Xenopus_tropicalis	17	0.0590292	0.144928
Amphibians	Xenopus_tropicalis	18	0.0592179	0.145391
Amphibians	Xenopus_tropicalis	19	0.06027	0.147975
Amphibians	Xenopus_tropicalis	20	0.0617481	0.151603
Amphibians	Xenopus_tropicalis	21	0.0613261	0.150567
Amphibians	Xenopus_tropicalis	22	0.0601358	0.147645
Amphibians	Xenopus_tropicalis	23	0.059638	0.146423
Amphibians	Xenopus_tropicalis	24	0.0610246	0.149827
Amphibians	Xenopus_tropicalis	25	0.0608963	0.149512
Amphibians	Xenopus_tropicalis	26	0.0614136	0.150782
Amphibians	Xenopus_tropicalis	27	0.062032	0.152301
Amphibians	Xenopus_tropicalis	28	0.0627633	0.154096
Amphibians	Xenopus_tropicalis	29	0.0620437	0.152329
Amphibians	Xenopus_tropicalis	30	0.0618901	0.151952
Amphibians	Xenopus_tropicalis	31	0.062878	0.154378
Amphibians	Xenopus_tropicalis	32	0.0635743	0.156087
Amphibians	Xenopus_tropicalis	33	0.0617228	0.151541
Amphibians	Xenopus_tropicalis	34	0.0614058	0.150763
Amphibians	Xenopus_tropicalis	35	0.0617656	0.151646
Amphibians	Xenopus_tropicalis	36	0.0633681	0.155581
Amphibians	Xenopus_tropicalis	37	0.0627574	0.154082
Amphibians	Xenopus_tropicalis	38	0.0630433	0.154784
Amphibians	Xenopus_tropicalis	39	0.0627283	0.15401
Amphibians	Xenopus_tropicalis	40	0.0618434	0.151837
Amphibians	Xenopus_tropicalis	41	0.0622674	0.152878
Amphibians	Xenopus_tropicalis	42	0.0618803	0.151928
Amphibians	Xenopus_tropicalis	43	0.0623121	0.152988
Amphibians	Xenopus_tropicalis	44	0.0631114	0.154951
Amphibians	Xenopus_tropicalis	45	0.0635587	0.156049
Amphibians	Xenopus_tropicalis	46	0.0626641	0.153852
Amphibians	Xenopus_tropicalis	47	0.0617695	0.151656
Amphibians	Xenopus_tropicalis	48	0.0629344	0.154516
Amphibians	Xenopus_tropicalis	49	0.0629947	0.154664
Amphibians	Xenopus_tropicalis	50	0.0617598	0.151632
Amphibians	Xenopus_tropicalis	51	0.0616314	0.151317
Amphibians	Xenopus_tropicalis	52	0.0618162	0.151771
Amphibians	Xenopus_tropicalis	53	0.0610616	0.149918
Amphibians	Xenopus_tropicalis	54	0.06161	0.151264
Amphibians	Xenopus_tropicalis	55	0.0622304	0.152788
Amphibians	Xenopus_tropicalis	56	0.0617111	0.151513
Amphibians	Xenopus_tropicalis	57	0.0614136	0.150782
Amphibians	Xenopus_tropicalis	58	0.0609215	0.149574
Amphibians	Xenopus_tropicalis	59	0.0615711	0.151169
Amphibians	Xenopus_tropicalis	60	0.0605365	0.148629
Amphibians	Xenopus_tropicalis	61	0.0602331	0.147884
Amphibians	Xenopus_tropicalis	62	0.0605345	0.148624
Amphibians	Xenopus_tropicalis	63	0.0599744	0.147249
Amphibians	Xenopus_tropicalis	64	0.0607601	0.149178
Amphibians	Xenopus_tropicalis	65	0.0613902	0.150725
Amphibians	Xenopus_tropicalis	66	0.0607465	0.149144
Amphibians	Xenopus_tropicalis	67	0.0602603	0.147951
Amphibians	Xenopus_tropicalis	68	0.0619076	0.151995
Amphibians	Xenopus_tropicalis	69	0.0608885	0.149493
Amphibians	Xenopus_tropicalis	70	0.0594765	0.146026
Amphibians	Xenopus_tropicalis	71	0.0585819	0.14383
Amphibians	Xenopus_tropicalis	72	0.0597663	0.146738
Amphibians	Xenopus_tropicalis	73	0.0591012	0.145105
Amphibians	Xenopus_tropicalis	74	0.0600405	0.147411
Amphibians	Xenopus_tropicalis	75	0.0601708	0.147731
Amphibians	Xenopus_tropicalis	76	0.0595465	0.146198
Amphibians	Xenopus_tropicalis	77	0.0593171	0.145635
Amphibians	Xenopus_tropicalis	78	0.0589864	0.144823
Amphibians	Xenopus_tropicalis	79	0.0583524	0.143266
Amphibians	Xenopus_tropicalis	80	0.0577768	0.141853
Amphibians	Xenopus_tropicalis	81	0.0577923	0.141891
Amphibians	Xenopus_tropicalis	82	0.0570747	0.140129
Amphibians	Xenopus_tropicalis	83	0.0564251	0.138535
Amphibians	Xenopus_tropicalis	84	0.0560361	0.13758
Amphibians	Xenopus_tropicalis	85	0.0560264	0.137556
Amphibians	Xenopus_tropicalis	86	0.0557775	0.136944
Amphibians	Xenopus_tropicalis	87	0.0553263	0.135837
Amphibians	Xenopus_tropicalis	88	0.0548634	0.1347
Amphibians	Xenopus_tropicalis	89	0.0559525	0.137374
Amphibians	Xenopus_tropicalis	90	0.0543228	0.133373
Amphibians	Xenopus_tropicalis	91	0.0534009	0.13111
Amphibians	Xenopus_tropicalis	92	0.0513744	0.126134
Amphibians	Xenopus_tropicalis	93	0.0509115	0.124998
Amphibians	Xenopus_tropicalis	94	0.0499294	0.122586
Amphibians	Xenopus_tropicalis	95	0.0498224	0.122324
Amphibians	Xenopus_tropicalis	96	0.0477123	0.117143
Amphibians	Xenopus_tropicalis	97	0.0453357	0.111308
Amphibians	Xenopus_tropicalis	98	0.0428716	0.105258
Amphibians	Xenopus_tropicalis	99	0.0393457	0.0966012
Amphibians	Xenopus_tropicalis	100	0.0391959	0.0962336
Amphibians	Leptobrachium_leishanense	1	0.0683043	0.15616
Amphibians	Leptobrachium_leishanense	2	0.0614824	0.140563
Amphibians	Leptobrachium_leishanense	3	0.0645427	0.14756
Amphibians	Leptobrachium_leishanense	4	0.0652363	0.149146
Amphibians	Leptobrachium_leishanense	5	0.0655766	0.149924
Amphibians	Leptobrachium_leishanense	6	0.0677861	0.154975
Amphibians	Leptobrachium_leishanense	7	0.0674638	0.154238
Amphibians	Leptobrachium_leishanense	8	0.0694259	0.158724
Amphibians	Leptobrachium_leishanense	9	0.0690855	0.157946
Amphibians	Leptobrachium_leishanense	10	0.0688922	0.157504
Amphibians	Leptobrachium_leishanense	11	0.0693923	0.158647
Amphibians	Leptobrachium_leishanense	12	0.0699931	0.160021
Amphibians	Leptobrachium_leishanense	13	0.0709831	0.162284
Amphibians	Leptobrachium_leishanense	14	0.0707717	0.161801
Amphibians	Leptobrachium_leishanense	15	0.071558	0.163599
Amphibians	Leptobrachium_leishanense	16	0.0720788	0.164789
Amphibians	Leptobrachium_leishanense	17	0.0709857	0.16229
Amphibians	Leptobrachium_leishanense	18	0.0714601	0.163375
Amphibians	Leptobrachium_leishanense	19	0.0716586	0.163828
Amphibians	Leptobrachium_leishanense	20	0.071393	0.163221
Amphibians	Leptobrachium_leishanense	21	0.0711533	0.162673
Amphibians	Leptobrachium_leishanense	22	0.0720505	0.164724
Amphibians	Leptobrachium_leishanense	23	0.0722645	0.165214
Amphibians	Leptobrachium_leishanense	24	0.0715916	0.163675
Amphibians	Leptobrachium_leishanense	25	0.0721407	0.164931
Amphibians	Leptobrachium_leishanense	26	0.0720324	0.164683
Amphibians	Leptobrachium_leishanense	27	0.0716947	0.163911
Amphibians	Leptobrachium_leishanense	28	0.0726718	0.166145
Amphibians	Leptobrachium_leishanense	29	0.0735948	0.168255
Amphibians	Leptobrachium_leishanense	30	0.074113	0.16944
Amphibians	Leptobrachium_leishanense	31	0.0735226	0.16809
Amphibians	Leptobrachium_leishanense	32	0.0748246	0.171067
Amphibians	Leptobrachium_leishanense	33	0.0752732	0.172092
Amphibians	Leptobrachium_leishanense	34	0.0734917	0.168019
Amphibians	Leptobrachium_leishanense	35	0.0736335	0.168344
Amphibians	Leptobrachium_leishanense	36	0.0739171	0.168992
Amphibians	Leptobrachium_leishanense	37	0.073404	0.167819
Amphibians	Leptobrachium_leishanense	38	0.0737959	0.168715
Amphibians	Leptobrachium_leishanense	39	0.0754305	0.172452
Amphibians	Leptobrachium_leishanense	40	0.0731926	0.167336
Amphibians	Leptobrachium_leishanense	41	0.073765	0.168644
Amphibians	Leptobrachium_leishanense	42	0.0733963	0.167801
Amphibians	Leptobrachium_leishanense	43	0.0731282	0.167188
Amphibians	Leptobrachium_leishanense	44	0.0750025	0.171474
Amphibians	Leptobrachium_leishanense	45	0.0748581	0.171143
Amphibians	Leptobrachium_leishanense	46	0.0739919	0.169163
Amphibians	Leptobrachium_leishanense	47	0.0728188	0.166481
Amphibians	Leptobrachium_leishanense	48	0.0726383	0.166068
Amphibians	Leptobrachium_leishanense	49	0.0710888	0.162526
Amphibians	Leptobrachium_leishanense	50	0.0708568	0.161995
Amphibians	Leptobrachium_leishanense	51	0.0729889	0.16687
Amphibians	Leptobrachium_leishanense	52	0.0732725	0.167518
Amphibians	Leptobrachium_leishanense	53	0.0732777	0.16753
Amphibians	Leptobrachium_leishanense	54	0.0735355	0.16812
Amphibians	Leptobrachium_leishanense	55	0.0718442	0.164253
Amphibians	Leptobrachium_leishanense	56	0.0728291	0.166505
Amphibians	Leptobrachium_leishanense	57	0.0731617	0.167265
Amphibians	Leptobrachium_leishanense	58	0.0714497	0.163351
Amphibians	Leptobrachium_leishanense	59	0.0720917	0.164819
Amphibians	Leptobrachium_leishanense	60	0.0719783	0.164559
Amphibians	Leptobrachium_leishanense	61	0.0718236	0.164206
Amphibians	Leptobrachium_leishanense	62	0.0711326	0.162626
Amphibians	Leptobrachium_leishanense	63	0.0722825	0.165255
Amphibians	Leptobrachium_leishanense	64	0.0715916	0.163675
Amphibians	Leptobrachium_leishanense	65	0.070617	0.161447
Amphibians	Leptobrachium_leishanense	66	0.0720685	0.164766
Amphibians	Leptobrachium_leishanense	67	0.0708619	0.162007
Amphibians	Leptobrachium_leishanense	68	0.0707639	0.161783
Amphibians	Leptobrachium_leishanense	69	0.0721639	0.164984
Amphibians	Leptobrachium_leishanense	70	0.0716019	0.163699
Amphibians	Leptobrachium_leishanense	71	0.0724372	0.165609
Amphibians	Leptobrachium_leishanense	72	0.0702199	0.160539
Amphibians	Leptobrachium_leishanense	73	0.0706686	0.161565
Amphibians	Leptobrachium_leishanense	74	0.070256	0.160622
Amphibians	Leptobrachium_leishanense	75	0.0702664	0.160646
Amphibians	Leptobrachium_leishanense	76	0.0714085	0.163257
Amphibians	Leptobrachium_leishanense	77	0.0710553	0.162449
Amphibians	Leptobrachium_leishanense	78	0.0699595	0.159944
Amphibians	Leptobrachium_leishanense	79	0.0695367	0.158977
Amphibians	Leptobrachium_leishanense	80	0.0691964	0.158199
Amphibians	Leptobrachium_leishanense	81	0.0696038	0.159131
Amphibians	Leptobrachium_leishanense	82	0.069217	0.158247
Amphibians	Leptobrachium_leishanense	83	0.0685802	0.156791
Amphibians	Leptobrachium_leishanense	84	0.0688045	0.157303
Amphibians	Leptobrachium_leishanense	85	0.0676469	0.154657
Amphibians	Leptobrachium_leishanense	86	0.0679099	0.155258
Amphibians	Leptobrachium_leishanense	87	0.0651022	0.148839
Amphibians	Leptobrachium_leishanense	88	0.064914	0.148409
Amphibians	Leptobrachium_leishanense	89	0.0656075	0.149994
Amphibians	Leptobrachium_leishanense	90	0.0652414	0.149157
Amphibians	Leptobrachium_leishanense	91	0.0632665	0.144642
Amphibians	Leptobrachium_leishanense	92	0.0640941	0.146534
Amphibians	Leptobrachium_leishanense	93	0.0624492	0.142774
Amphibians	Leptobrachium_leishanense	94	0.061815	0.141324
Amphibians	Leptobrachium_leishanense	95	0.059028	0.134952
Amphibians	Leptobrachium_leishanense	96	0.0579348	0.132453
Amphibians	Leptobrachium_leishanense	97	0.0561223	0.128309
Amphibians	Leptobrachium_leishanense	98	0.0535003	0.122314
Amphibians	Leptobrachium_leishanense	99	0.0469362	0.107307
Amphibians	Leptobrachium_leishanense	100	0.0414266	0.094711
Aves	Aquila_chrysaetos	1	0.131311	0.311829
Aves	Aquila_chrysaetos	2	0.0861123	0.204494
Aves	Aquila_chrysaetos	3	0.0773072	0.183584
Aves	Aquila_chrysaetos	4	0.0732508	0.173951
Aves	Aquila_chrysaetos	5	0.0705211	0.167469
Aves	Aquila_chrysaetos	6	0.0680902	0.161696
Aves	Aquila_chrysaetos	7	0.066585	0.158122
Aves	Aquila_chrysaetos	8	0.0648758	0.154063
Aves	Aquila_chrysaetos	9	0.0629442	0.149476
Aves	Aquila_chrysaetos	10	0.0634872	0.150765
Aves	Aquila_chrysaetos	11	0.0625943	0.148645
Aves	Aquila_chrysaetos	12	0.0616394	0.146377
Aves	Aquila_chrysaetos	13	0.0613916	0.145789
Aves	Aquila_chrysaetos	14	0.0611073	0.145114
Aves	Aquila_chrysaetos	15	0.0594054	0.141072
Aves	Aquila_chrysaetos	16	0.0590482	0.140224
Aves	Aquila_chrysaetos	17	0.0595111	0.141323
Aves	Aquila_chrysaetos	18	0.0582719	0.13838
Aves	Aquila_chrysaetos	19	0.0584724	0.138856
Aves	Aquila_chrysaetos	20	0.0581735	0.138147
Aves	Aquila_chrysaetos	21	0.0574884	0.136519
Aves	Aquila_chrysaetos	22	0.0575977	0.136779
Aves	Aquila_chrysaetos	23	0.0566902	0.134624
Aves	Aquila_chrysaetos	24	0.0562055	0.133473
Aves	Aquila_chrysaetos	25	0.0557937	0.132495
Aves	Aquila_chrysaetos	26	0.0557026	0.132279
Aves	Aquila_chrysaetos	27	0.0556697	0.132201
Aves	Aquila_chrysaetos	28	0.0550247	0.130669
Aves	Aquila_chrysaetos	29	0.054755	0.130028
Aves	Aquila_chrysaetos	30	0.0546347	0.129743
Aves	Aquila_chrysaetos	31	0.054376	0.129128
Aves	Aquila_chrysaetos	32	0.0548643	0.130288
Aves	Aquila_chrysaetos	33	0.0542229	0.128765
Aves	Aquila_chrysaetos	34	0.053607	0.127302
Aves	Aquila_chrysaetos	35	0.0537673	0.127683
Aves	Aquila_chrysaetos	36	0.0538038	0.12777
Aves	Aquila_chrysaetos	37	0.0537746	0.1277
Aves	Aquila_chrysaetos	38	0.0538511	0.127882
Aves	Aquila_chrysaetos	39	0.0540334	0.128315
Aves	Aquila_chrysaetos	40	0.0545728	0.129596
Aves	Aquila_chrysaetos	41	0.053935	0.128081
Aves	Aquila_chrysaetos	42	0.0524517	0.124559
Aves	Aquila_chrysaetos	43	0.0519305	0.123321
Aves	Aquila_chrysaetos	44	0.0533227	0.126627
Aves	Aquila_chrysaetos	45	0.0525683	0.124836
Aves	Aquila_chrysaetos	46	0.0523897	0.124412
Aves	Aquila_chrysaetos	47	0.0524589	0.124576
Aves	Aquila_chrysaetos	48	0.0519524	0.123373
Aves	Aquila_chrysaetos	49	0.0514166	0.122101
Aves	Aquila_chrysaetos	50	0.0512891	0.121798
Aves	Aquila_chrysaetos	51	0.0513656	0.12198
Aves	Aquila_chrysaetos	52	0.0513875	0.122031
Aves	Aquila_chrysaetos	53	0.0513729	0.121997
Aves	Aquila_chrysaetos	54	0.0505638	0.120076
Aves	Aquila_chrysaetos	55	0.0510048	0.121123
Aves	Aquila_chrysaetos	56	0.0504909	0.119902
Aves	Aquila_chrysaetos	57	0.0513437	0.121928
Aves	Aquila_chrysaetos	58	0.0506258	0.120223
Aves	Aquila_chrysaetos	59	0.0508153	0.120673
Aves	Aquila_chrysaetos	60	0.0511542	0.121478
Aves	Aquila_chrysaetos	61	0.0504326	0.119764
Aves	Aquila_chrysaetos	62	0.0501119	0.119002
Aves	Aquila_chrysaetos	63	0.0500463	0.118847
Aves	Aquila_chrysaetos	64	0.0498786	0.118448
Aves	Aquila_chrysaetos	65	0.049383	0.117271
Aves	Aquila_chrysaetos	66	0.0494705	0.117479
Aves	Aquila_chrysaetos	67	0.0496126	0.117817
Aves	Aquila_chrysaetos	68	0.0508153	0.120673
Aves	Aquila_chrysaetos	69	0.0493101	0.117098
Aves	Aquila_chrysaetos	70	0.0494887	0.117522
Aves	Aquila_chrysaetos	71	0.0496745	0.117964
Aves	Aquila_chrysaetos	72	0.0495361	0.117635
Aves	Aquila_chrysaetos	73	0.0501447	0.11908
Aves	Aquila_chrysaetos	74	0.0503378	0.119539
Aves	Aquila_chrysaetos	75	0.0495069	0.117566
Aves	Aquila_chrysaetos	76	0.0501265	0.119037
Aves	Aquila_chrysaetos	77	0.0495397	0.117644
Aves	Aquila_chrysaetos	78	0.0501046	0.118985
Aves	Aquila_chrysaetos	79	0.0500937	0.118959
Aves	Aquila_chrysaetos	80	0.0506403	0.120257
Aves	Aquila_chrysaetos	81	0.0511797	0.121538
Aves	Aquila_chrysaetos	82	0.0508554	0.120768
Aves	Aquila_chrysaetos	83	0.0513	0.121824
Aves	Aquila_chrysaetos	84	0.0501155	0.119011
Aves	Aquila_chrysaetos	85	0.0497073	0.118042
Aves	Aquila_chrysaetos	86	0.0502722	0.119383
Aves	Aquila_chrysaetos	87	0.0510412	0.121209
Aves	Aquila_chrysaetos	88	0.0506586	0.120301
Aves	Aquila_chrysaetos	89	0.0507715	0.120569
Aves	Aquila_chrysaetos	90	0.0504362	0.119773
Aves	Aquila_chrysaetos	91	0.0500973	0.118968
Aves	Aquila_chrysaetos	92	0.0499953	0.118725
Aves	Aquila_chrysaetos	93	0.049813	0.118293
Aves	Aquila_chrysaetos	94	0.049988	0.118708
Aves	Aquila_chrysaetos	95	0.049824	0.118319
Aves	Aquila_chrysaetos	96	0.0497948	0.118249
Aves	Aquila_chrysaetos	97	0.0494267	0.117375
Aves	Aquila_chrysaetos	98	0.0483261	0.114762
Aves	Aquila_chrysaetos	99	0.0454141	0.107846
Aves	Aquila_chrysaetos	100	0.0593288	0.14089
Aves	Meleagris_gallopavo	1	0.0432973	0.104684
Aves	Meleagris_gallopavo	2	0.0287188	0.0694363
Aves	Meleagris_gallopavo	3	0.0275645	0.0666454
Aves	Meleagris_gallopavo	4	0.0270778	0.0654685
Aves	Meleagris_gallopavo	5	0.0268448	0.0649053
Aves	Meleagris_gallopavo	6	0.0263059	0.0636023
Aves	Meleagris_gallopavo	7	0.0259408	0.0627196
Aves	Meleagris_gallopavo	8	0.0250195	0.0604919
Aves	Meleagris_gallopavo	9	0.0255584	0.0617949
Aves	Meleagris_gallopavo	10	0.0248109	0.0599876
Aves	Meleagris_gallopavo	11	0.0241051	0.0582811
Aves	Meleagris_gallopavo	12	0.023966	0.0579448
Aves	Meleagris_gallopavo	13	0.0241294	0.0583399
Aves	Meleagris_gallopavo	14	0.0239729	0.0579616
Aves	Meleagris_gallopavo	15	0.0238582	0.0576842
Aves	Meleagris_gallopavo	16	0.0231246	0.0559105
Aves	Meleagris_gallopavo	17	0.0235835	0.0570201
Aves	Meleagris_gallopavo	18	0.023507	0.0568352
Aves	Meleagris_gallopavo	19	0.0237608	0.0574489
Aves	Meleagris_gallopavo	20	0.0237539	0.057432
Aves	Meleagris_gallopavo	21	0.0241711	0.0584408
Aves	Meleagris_gallopavo	22	0.0237991	0.0575413
Aves	Meleagris_gallopavo	23	0.0236079	0.057079
Aves	Meleagris_gallopavo	24	0.0235001	0.0568184
Aves	Meleagris_gallopavo	25	0.0230411	0.0557087
Aves	Meleagris_gallopavo	26	0.0228117	0.0551539
Aves	Meleagris_gallopavo	27	0.0223875	0.0541284
Aves	Meleagris_gallopavo	28	0.022384	0.05412
Aves	Meleagris_gallopavo	29	0.0217756	0.0526488
Aves	Meleagris_gallopavo	30	0.0215982	0.0522201
Aves	Meleagris_gallopavo	31	0.0219355	0.0530355
Aves	Meleagris_gallopavo	32	0.0218242	0.0527665
Aves	Meleagris_gallopavo	33	0.0217651	0.0526236
Aves	Meleagris_gallopavo	34	0.0219181	0.0529935
Aves	Meleagris_gallopavo	35	0.0217477	0.0525816
Aves	Meleagris_gallopavo	36	0.0216469	0.0523378
Aves	Meleagris_gallopavo	37	0.0215565	0.0521192
Aves	Meleagris_gallopavo	38	0.0213896	0.0517157
Aves	Meleagris_gallopavo	39	0.0217547	0.0525984
Aves	Meleagris_gallopavo	40	0.0212123	0.051287
Aves	Meleagris_gallopavo	41	0.0216226	0.052279
Aves	Meleagris_gallopavo	42	0.0213583	0.0516401
Aves	Meleagris_gallopavo	43	0.0212262	0.0513206
Aves	Meleagris_gallopavo	44	0.0208716	0.0504632
Aves	Meleagris_gallopavo	45	0.0210419	0.0508751
Aves	Meleagris_gallopavo	46	0.0207116	0.0500765
Aves	Meleagris_gallopavo	47	0.0198355	0.0479581
Aves	Meleagris_gallopavo	48	0.0200649	0.0485129
Aves	Meleagris_gallopavo	49	0.0208924	0.0505136
Aves	Meleagris_gallopavo	50	0.0203848	0.0492863
Aves	Meleagris_gallopavo	51	0.0204683	0.0494881
Aves	Meleagris_gallopavo	52	0.0197486	0.047748
Aves	Meleagris_gallopavo	53	0.0197903	0.0478488
Aves	Meleagris_gallopavo	54	0.0200545	0.0484877
Aves	Meleagris_gallopavo	55	0.0204822	0.0495217
Aves	Meleagris_gallopavo	56	0.0203257	0.0491434
Aves	Meleagris_gallopavo	57	0.0201275	0.0486642
Aves	Meleagris_gallopavo	58	0.0198111	0.0478993
Aves	Meleagris_gallopavo	59	0.0191714	0.0463525
Aves	Meleagris_gallopavo	60	0.0194183	0.0469494
Aves	Meleagris_gallopavo	61	0.0194043	0.0469157
Aves	Meleagris_gallopavo	62	0.0196269	0.0474537
Aves	Meleagris_gallopavo	63	0.0198633	0.0480254
Aves	Meleagris_gallopavo	64	0.0202145	0.0488744
Aves	Meleagris_gallopavo	65	0.0200337	0.0484373
Aves	Meleagris_gallopavo	66	0.0197103	0.0476555
Aves	Meleagris_gallopavo	67	0.020058	0.0484961
Aves	Meleagris_gallopavo	68	0.019679	0.0475798
Aves	Meleagris_gallopavo	69	0.0199745	0.0482944
Aves	Meleagris_gallopavo	70	0.0199328	0.0481935
Aves	Meleagris_gallopavo	71	0.0198842	0.0480758
Aves	Meleagris_gallopavo	72	0.0195469	0.0472604
Aves	Meleagris_gallopavo	73	0.0204544	0.0494544
Aves	Meleagris_gallopavo	74	0.0202423	0.0489417
Aves	Meleagris_gallopavo	75	0.0202701	0.0490089
Aves	Meleagris_gallopavo	76	0.0206491	0.0499252
Aves	Meleagris_gallopavo	77	0.0207116	0.0500765
Aves	Meleagris_gallopavo	78	0.0200754	0.0485381
Aves	Meleagris_gallopavo	79	0.0201971	0.0488324
Aves	Meleagris_gallopavo	80	0.020138	0.0486895
Aves	Meleagris_gallopavo	81	0.0203049	0.049093
Aves	Meleagris_gallopavo	82	0.0192444	0.046529
Aves	Meleagris_gallopavo	83	0.0196721	0.047563
Aves	Meleagris_gallopavo	84	0.0201171	0.048639
Aves	Meleagris_gallopavo	85	0.019759	0.0477732
Aves	Meleagris_gallopavo	86	0.019905	0.0481262
Aves	Meleagris_gallopavo	87	0.0200163	0.0483952
Aves	Meleagris_gallopavo	88	0.0196616	0.0475378
Aves	Meleagris_gallopavo	89	0.0197346	0.0477143
Aves	Meleagris_gallopavo	90	0.0200893	0.0485718
Aves	Meleagris_gallopavo	91	0.0202457	0.0489501
Aves	Meleagris_gallopavo	92	0.0198772	0.048059
Aves	Meleagris_gallopavo	93	0.0198111	0.0478993
Aves	Meleagris_gallopavo	94	0.0197242	0.0476891
Aves	Meleagris_gallopavo	95	0.0199294	0.0481851
Aves	Meleagris_gallopavo	96	0.0203361	0.0491686
Aves	Meleagris_gallopavo	97	0.0198355	0.0479581
Aves	Meleagris_gallopavo	98	0.0195052	0.0471595
Aves	Meleagris_gallopavo	99	0.0187889	0.0454278
Aves	Meleagris_gallopavo	100	0.0260139	0.0628962
Aves	Amazona_collaria	1	0.076174	0.179868
Aves	Amazona_collaria	2	0.0497094	0.117377
Aves	Amazona_collaria	3	0.0461511	0.108976
Aves	Amazona_collaria	4	0.0443756	0.104783
Aves	Amazona_collaria	5	0.0435371	0.102803
Aves	Amazona_collaria	6	0.0424414	0.100216
Aves	Amazona_collaria	7	0.0422653	0.0998
Aves	Amazona_collaria	8	0.0415466	0.0981029
Aves	Amazona_collaria	9	0.0409371	0.0966638
Aves	Amazona_collaria	10	0.0415818	0.0981861
Aves	Amazona_collaria	11	0.0411943	0.0972711
Aves	Amazona_collaria	12	0.0404826	0.0955907
Aves	Amazona_collaria	13	0.0402079	0.0949418
Aves	Amazona_collaria	14	0.0399225	0.094268
Aves	Amazona_collaria	15	0.0390664	0.0922465
Aves	Amazona_collaria	16	0.039616	0.0935443
Aves	Amazona_collaria	17	0.0395949	0.0934943
Aves	Amazona_collaria	18	0.0391897	0.0925377
Aves	Amazona_collaria	19	0.0384745	0.090849
Aves	Amazona_collaria	20	0.0378968	0.0894847
Aves	Amazona_collaria	21	0.0376255	0.0888442
Aves	Amazona_collaria	22	0.0379602	0.0896345
Aves	Amazona_collaria	23	0.037932	0.0895679
Aves	Amazona_collaria	24	0.037784	0.0892185
Aves	Amazona_collaria	25	0.0365475	0.0862986
Aves	Amazona_collaria	26	0.0369068	0.0871471
Aves	Amazona_collaria	27	0.0363044	0.0857246
Aves	Amazona_collaria	28	0.0364946	0.0861739
Aves	Amazona_collaria	29	0.0358429	0.0846349
Aves	Amazona_collaria	30	0.0358781	0.0847181
Aves	Amazona_collaria	31	0.0351101	0.0829046
Aves	Amazona_collaria	32	0.0350572	0.0827798
Aves	Amazona_collaria	33	0.0360543	0.085134
Aves	Amazona_collaria	34	0.0360014	0.0850092
Aves	Amazona_collaria	35	0.0353179	0.0833954
Aves	Amazona_collaria	36	0.0348635	0.0823223
Aves	Amazona_collaria	37	0.034786	0.0821393
Aves	Amazona_collaria	38	0.0342364	0.0808415
Aves	Amazona_collaria	39	0.034483	0.0814239
Aves	Amazona_collaria	40	0.0349093	0.0824304
Aves	Amazona_collaria	41	0.0352545	0.0832457
Aves	Amazona_collaria	42	0.0349269	0.082472
Aves	Amazona_collaria	43	0.0341765	0.0807001
Aves	Amazona_collaria	44	0.0347825	0.0821309
Aves	Amazona_collaria	45	0.0335635	0.0792527
Aves	Amazona_collaria	46	0.0343597	0.0811327
Aves	Amazona_collaria	47	0.0347014	0.0819396
Aves	Amazona_collaria	48	0.033944	0.0801511
Aves	Amazona_collaria	49	0.0337502	0.0796936
Aves	Amazona_collaria	50	0.0334437	0.0789698
Aves	Amazona_collaria	51	0.0338806	0.0800013
Aves	Amazona_collaria	52	0.0339334	0.0801261
Aves	Amazona_collaria	53	0.0335283	0.0791695
Aves	Amazona_collaria	54	0.0338172	0.0798516
Aves	Amazona_collaria	55	0.0337502	0.0796936
Aves	Amazona_collaria	56	0.0337573	0.0797102
Aves	Amazona_collaria	57	0.0338982	0.0800429
Aves	Amazona_collaria	58	0.0341166	0.0805587
Aves	Amazona_collaria	59	0.033641	0.0794357
Aves	Amazona_collaria	60	0.0333733	0.0788034
Aves	Amazona_collaria	61	0.0325735	0.0769151
Aves	Amazona_collaria	62	0.032637	0.0770648
Aves	Amazona_collaria	63	0.0333416	0.0787286
Aves	Amazona_collaria	64	0.0330879	0.0781296
Aves	Amazona_collaria	65	0.032112	0.0758253
Aves	Amazona_collaria	66	0.0329329	0.0777636
Aves	Amazona_collaria	67	0.0326933	0.0771979
Aves	Amazona_collaria	68	0.0322389	0.0761248
Aves	Amazona_collaria	69	0.0332042	0.0784041
Aves	Amazona_collaria	70	0.0322917	0.0762496
Aves	Amazona_collaria	71	0.031411	0.0741699
Aves	Amazona_collaria	72	0.0321754	0.0759751
Aves	Amazona_collaria	73	0.0323692	0.0764326
Aves	Amazona_collaria	74	0.031883	0.0752846
Aves	Amazona_collaria	75	0.0325242	0.0767986
Aves	Amazona_collaria	76	0.0324749	0.0766822
Aves	Amazona_collaria	77	0.0319535	0.075451
Aves	Amazona_collaria	78	0.0325066	0.076757
Aves	Amazona_collaria	79	0.0318443	0.0751931
Aves	Amazona_collaria	80	0.0316153	0.0746524
Aves	Amazona_collaria	81	0.0331161	0.0781962
Aves	Amazona_collaria	82	0.0334613	0.0790114
Aves	Amazona_collaria	83	0.0327567	0.0773477
Aves	Amazona_collaria	84	0.0326722	0.077148
Aves	Amazona_collaria	85	0.0325735	0.0769151
Aves	Amazona_collaria	86	0.0323903	0.0764825
Aves	Amazona_collaria	87	0.0334437	0.0789698
Aves	Amazona_collaria	88	0.0325418	0.0768402
Aves	Amazona_collaria	89	0.0322706	0.0761997
Aves	Amazona_collaria	90	0.0329012	0.0776887
Aves	Amazona_collaria	91	0.0323375	0.0763577
Aves	Amazona_collaria	92	0.0313969	0.0741366
Aves	Amazona_collaria	93	0.0311432	0.0735377
Aves	Amazona_collaria	94	0.0308649	0.0728805
Aves	Amazona_collaria	95	0.0305337	0.0720985
Aves	Amazona_collaria	96	0.0301955	0.0712999
Aves	Amazona_collaria	97	0.0300934	0.0710587
Aves	Amazona_collaria	98	0.029047	0.068588
Aves	Amazona_collaria	99	0.0285221	0.0673485
Aves	Amazona_collaria	100	0.0383442	0.0905412
Aves	Apteryx_haastii	1	0.0653755	0.15795
Aves	Apteryx_haastii	2	0.0436317	0.105416
Aves	Apteryx_haastii	3	0.0427125	0.103195
Aves	Apteryx_haastii	4	0.0423643	0.102354
Aves	Apteryx_haastii	5	0.0417005	0.10075
Aves	Apteryx_haastii	6	0.0418166	0.101031
Aves	Apteryx_haastii	7	0.0422669	0.102119
Aves	Apteryx_haastii	8	0.0417794	0.100941
Aves	Apteryx_haastii	9	0.0415984	0.100503
Aves	Apteryx_haastii	10	0.0414266	0.100088
Aves	Apteryx_haastii	11	0.0403264	0.0974304
Aves	Apteryx_haastii	12	0.0391427	0.0945704
Aves	Apteryx_haastii	13	0.0398483	0.0962752
Aves	Apteryx_haastii	14	0.0397183	0.0959611
Aves	Apteryx_haastii	15	0.0395883	0.0956471
Aves	Apteryx_haastii	16	0.0394305	0.0952658
Aves	Apteryx_haastii	17	0.0394073	0.0952097
Aves	Apteryx_haastii	18	0.0388549	0.093875
Aves	Apteryx_haastii	19	0.0390127	0.0942564
Aves	Apteryx_haastii	20	0.0388549	0.093875
Aves	Apteryx_haastii	21	0.0386506	0.0933815
Aves	Apteryx_haastii	22	0.0380007	0.0918113
Aves	Apteryx_haastii	23	0.0385856	0.0932245
Aves	Apteryx_haastii	24	0.0377268	0.0911496
Aves	Apteryx_haastii	25	0.0370259	0.0894561
Aves	Apteryx_haastii	26	0.0370212	0.0894448
Aves	Apteryx_haastii	27	0.0362274	0.087527
Aves	Apteryx_haastii	28	0.0363249	0.0877625
Aves	Apteryx_haastii	29	0.0357121	0.086282
Aves	Apteryx_haastii	30	0.0356239	0.0860689
Aves	Apteryx_haastii	31	0.0346723	0.0837697
Aves	Apteryx_haastii	32	0.034287	0.0828388
Aves	Apteryx_haastii	33	0.0336232	0.081235
Aves	Apteryx_haastii	34	0.0339713	0.0820762
Aves	Apteryx_haastii	35	0.0341338	0.0824687
Aves	Apteryx_haastii	36	0.0349369	0.084409
Aves	Apteryx_haastii	37	0.0342499	0.0827491
Aves	Apteryx_haastii	38	0.0341988	0.0826257
Aves	Apteryx_haastii	39	0.0346676	0.0837585
Aves	Apteryx_haastii	40	0.0338878	0.0818743
Aves	Apteryx_haastii	41	0.0335582	0.081078
Aves	Apteryx_haastii	42	0.033029	0.0797994
Aves	Apteryx_haastii	43	0.0334468	0.0808088
Aves	Apteryx_haastii	44	0.0331961	0.0802031
Aves	Apteryx_haastii	45	0.0338599	0.081807
Aves	Apteryx_haastii	46	0.0333446	0.080562
Aves	Apteryx_haastii	47	0.0332657	0.0803714
Aves	Apteryx_haastii	48	0.0337578	0.0815602
Aves	Apteryx_haastii	49	0.0328433	0.0793508
Aves	Apteryx_haastii	50	0.0330615	0.0798779
Aves	Apteryx_haastii	51	0.0323605	0.0781843
Aves	Apteryx_haastii	52	0.0328293	0.0793171
Aves	Apteryx_haastii	53	0.0326297	0.0788348
Aves	Apteryx_haastii	54	0.0332564	0.0803489
Aves	Apteryx_haastii	55	0.032769	0.0791713
Aves	Apteryx_haastii	56	0.0325647	0.0786778
Aves	Apteryx_haastii	57	0.0321934	0.0777806
Aves	Apteryx_haastii	58	0.0322537	0.0779264
Aves	Apteryx_haastii	59	0.0324858	0.0784871
Aves	Apteryx_haastii	60	0.0323791	0.0782292
Aves	Apteryx_haastii	61	0.0325508	0.0786442
Aves	Apteryx_haastii	62	0.0315388	0.0761992
Aves	Apteryx_haastii	63	0.0314692	0.0760309
Aves	Apteryx_haastii	64	0.0319102	0.0770964
Aves	Apteryx_haastii	65	0.0317802	0.0767824
Aves	Apteryx_haastii	66	0.0328897	0.0794629
Aves	Apteryx_haastii	67	0.0329129	0.079519
Aves	Apteryx_haastii	68	0.0321609	0.0777021
Aves	Apteryx_haastii	69	0.0320402	0.0774104
Aves	Apteryx_haastii	70	0.032082	0.0775114
Aves	Apteryx_haastii	71	0.0324858	0.0784871
Aves	Apteryx_haastii	72	0.0323326	0.078117
Aves	Apteryx_haastii	73	0.0331125	0.0800013
Aves	Apteryx_haastii	74	0.032834	0.0793283
Aves	Apteryx_haastii	75	0.033405	0.0807078
Aves	Apteryx_haastii	76	0.0332704	0.0803826
Aves	Apteryx_haastii	77	0.0324765	0.0784647
Aves	Apteryx_haastii	78	0.0328293	0.0793171
Aves	Apteryx_haastii	79	0.0325833	0.0787227
Aves	Apteryx_haastii	80	0.0330336	0.0798106
Aves	Apteryx_haastii	81	0.0337764	0.0816051
Aves	Apteryx_haastii	82	0.0336139	0.0812126
Aves	Apteryx_haastii	83	0.0339249	0.081964
Aves	Apteryx_haastii	84	0.0335721	0.0811116
Aves	Apteryx_haastii	85	0.033586	0.0811453
Aves	Apteryx_haastii	86	0.0342777	0.0828164
Aves	Apteryx_haastii	87	0.0343334	0.082951
Aves	Apteryx_haastii	88	0.0339342	0.0819864
Aves	Apteryx_haastii	89	0.0332982	0.0804499
Aves	Apteryx_haastii	90	0.033586	0.0811453
Aves	Apteryx_haastii	91	0.0343102	0.0828949
Aves	Apteryx_haastii	92	0.0337392	0.0815154
Aves	Apteryx_haastii	93	0.0327226	0.0790591
Aves	Apteryx_haastii	94	0.0336464	0.0812911
Aves	Apteryx_haastii	95	0.0341199	0.0824351
Aves	Apteryx_haastii	96	0.0342127	0.0826594
Aves	Apteryx_haastii	97	0.0334003	0.0806966
Aves	Apteryx_haastii	98	0.0336696	0.0813471
Aves	Apteryx_haastii	99	0.0325415	0.0786217
Aves	Apteryx_haastii	100	0.0442351	0.106874
Aves	Gallus_gallus	1	0.108775	0.257762
Aves	Gallus_gallus	2	0.071172	0.168654
Aves	Gallus_gallus	3	0.0663785	0.157295
Aves	Gallus_gallus	4	0.0622484	0.147508
Aves	Gallus_gallus	5	0.0604929	0.143348
Aves	Gallus_gallus	6	0.05862	0.13891
Aves	Gallus_gallus	7	0.0569837	0.135032
Aves	Gallus_gallus	8	0.0564538	0.133777
Aves	Gallus_gallus	9	0.0559259	0.132526
Aves	Gallus_gallus	10	0.055487	0.131486
Aves	Gallus_gallus	11	0.0553191	0.131088
Aves	Gallus_gallus	12	0.054862	0.130005
Aves	Gallus_gallus	13	0.0538851	0.12769
Aves	Gallus_gallus	14	0.0536606	0.127158
Aves	Gallus_gallus	15	0.0535251	0.126837
Aves	Gallus_gallus	16	0.0531874	0.126036
Aves	Gallus_gallus	17	0.0529811	0.125548
Aves	Gallus_gallus	18	0.0523743	0.12411
Aves	Gallus_gallus	19	0.0519556	0.123118
Aves	Gallus_gallus	20	0.0516158	0.122312
Aves	Gallus_gallus	21	0.0515895	0.12225
Aves	Gallus_gallus	22	0.0508776	0.120563
Aves	Gallus_gallus	23	0.0507461	0.120251
Aves	Gallus_gallus	24	0.051001	0.120855
Aves	Gallus_gallus	25	0.0503598	0.119336
Aves	Gallus_gallus	26	0.05002	0.118531
Aves	Gallus_gallus	27	0.0499088	0.118267
Aves	Gallus_gallus	28	0.0498643	0.118162
Aves	Gallus_gallus	29	0.0493566	0.116959
Aves	Gallus_gallus	30	0.0493485	0.11694
Aves	Gallus_gallus	31	0.0494557	0.117194
Aves	Gallus_gallus	32	0.04876	0.115545
Aves	Gallus_gallus	33	0.0489642	0.116029
Aves	Gallus_gallus	34	0.0486063	0.115181
Aves	Gallus_gallus	35	0.048766	0.115559
Aves	Gallus_gallus	36	0.0485071	0.114946
Aves	Gallus_gallus	37	0.047957	0.113642
Aves	Gallus_gallus	38	0.0470752	0.111553
Aves	Gallus_gallus	39	0.0479429	0.113609
Aves	Gallus_gallus	40	0.0477406	0.113129
Aves	Gallus_gallus	41	0.047243	0.11195
Aves	Gallus_gallus	42	0.0470792	0.111562
Aves	Gallus_gallus	43	0.0470914	0.111591
Aves	Gallus_gallus	44	0.0467232	0.110719
Aves	Gallus_gallus	45	0.0465938	0.110412
Aves	Gallus_gallus	46	0.0466707	0.110594
Aves	Gallus_gallus	47	0.0465331	0.110268
Aves	Gallus_gallus	48	0.0463329	0.109794
Aves	Gallus_gallus	49	0.0466585	0.110565
Aves	Gallus_gallus	50	0.0464785	0.110139
Aves	Gallus_gallus	51	0.0466605	0.11057
Aves	Gallus_gallus	52	0.0461994	0.109477
Aves	Gallus_gallus	53	0.0456998	0.108293
Aves	Gallus_gallus	54	0.0451436	0.106975
Aves	Gallus_gallus	55	0.0452023	0.107114
Aves	Gallus_gallus	56	0.0453863	0.107551
Aves	Gallus_gallus	57	0.0446258	0.105748
Aves	Gallus_gallus	58	0.0447452	0.106031
Aves	Gallus_gallus	59	0.0451092	0.106894
Aves	Gallus_gallus	60	0.0436874	0.103525
Aves	Gallus_gallus	61	0.0443386	0.105068
Aves	Gallus_gallus	62	0.0440069	0.104282
Aves	Gallus_gallus	63	0.0437501	0.103673
Aves	Gallus_gallus	64	0.0444883	0.105423
Aves	Gallus_gallus	65	0.0448281	0.106228
Aves	Gallus_gallus	66	0.0447775	0.106108
Aves	Gallus_gallus	67	0.0448059	0.106175
Aves	Gallus_gallus	68	0.044729	0.105993
Aves	Gallus_gallus	69	0.0450769	0.106817
Aves	Gallus_gallus	70	0.0448969	0.106391
Aves	Gallus_gallus	71	0.0439483	0.104143
Aves	Gallus_gallus	72	0.0441485	0.104617
Aves	Gallus_gallus	73	0.0437946	0.103779
Aves	Gallus_gallus	74	0.0439442	0.104133
Aves	Gallus_gallus	75	0.0440251	0.104325
Aves	Gallus_gallus	76	0.043742	0.103654
Aves	Gallus_gallus	77	0.044282	0.104934
Aves	Gallus_gallus	78	0.0443467	0.105087
Aves	Gallus_gallus	79	0.0435984	0.103314
Aves	Gallus_gallus	80	0.0442274	0.104804
Aves	Gallus_gallus	81	0.044729	0.105993
Aves	Gallus_gallus	82	0.0445166	0.10549
Aves	Gallus_gallus	83	0.044367	0.105135
Aves	Gallus_gallus	84	0.0444357	0.105298
Aves	Gallus_gallus	85	0.0441526	0.104627
Aves	Gallus_gallus	86	0.0441829	0.104699
Aves	Gallus_gallus	87	0.0444438	0.105317
Aves	Gallus_gallus	88	0.0445449	0.105557
Aves	Gallus_gallus	89	0.0440353	0.104349
Aves	Gallus_gallus	90	0.0443488	0.105092
Aves	Gallus_gallus	91	0.043746	0.103664
Aves	Gallus_gallus	92	0.0437036	0.103563
Aves	Gallus_gallus	93	0.0435175	0.103122
Aves	Gallus_gallus	94	0.0441081	0.104521
Aves	Gallus_gallus	95	0.0439908	0.104244
Aves	Gallus_gallus	96	0.0443346	0.105058
Aves	Gallus_gallus	97	0.0437925	0.103774
Aves	Gallus_gallus	98	0.0435964	0.103309
Aves	Gallus_gallus	99	0.0416527	0.098703
Aves	Gallus_gallus	100	0.054593	0.129367
Aves	Corvus_moneduloides	1	0.132711	0.311747
Aves	Corvus_moneduloides	2	0.0876723	0.205949
Aves	Corvus_moneduloides	3	0.0818728	0.192325
Aves	Corvus_moneduloides	4	0.0781103	0.183487
Aves	Corvus_moneduloides	5	0.0763326	0.179311
Aves	Corvus_moneduloides	6	0.0753854	0.177086
Aves	Corvus_moneduloides	7	0.0741964	0.174293
Aves	Corvus_moneduloides	8	0.0728995	0.171246
Aves	Corvus_moneduloides	9	0.0715851	0.168159
Aves	Corvus_moneduloides	10	0.0706467	0.165954
Aves	Corvus_moneduloides	11	0.0691983	0.162552
Aves	Corvus_moneduloides	12	0.068426	0.160738
Aves	Corvus_moneduloides	13	0.0678722	0.159437
Aves	Corvus_moneduloides	14	0.0677877	0.159238
Aves	Corvus_moneduloides	15	0.0676012	0.1588
Aves	Corvus_moneduloides	16	0.0679072	0.159519
Aves	Corvus_moneduloides	17	0.0663772	0.155925
Aves	Corvus_moneduloides	18	0.0662081	0.155528
Aves	Corvus_moneduloides	19	0.0650133	0.152721
Aves	Corvus_moneduloides	20	0.0650482	0.152803
Aves	Corvus_moneduloides	21	0.0639146	0.15014
Aves	Corvus_moneduloides	22	0.0638592	0.15001
Aves	Corvus_moneduloides	23	0.0641331	0.150653
Aves	Corvus_moneduloides	24	0.0633055	0.148709
Aves	Corvus_moneduloides	25	0.0635911	0.14938
Aves	Corvus_moneduloides	26	0.063728	0.149702
Aves	Corvus_moneduloides	27	0.0633841	0.148894
Aves	Corvus_moneduloides	28	0.0636319	0.149476
Aves	Corvus_moneduloides	29	0.063559	0.149305
Aves	Corvus_moneduloides	30	0.0634832	0.149127
Aves	Corvus_moneduloides	31	0.0629557	0.147888
Aves	Corvus_moneduloides	32	0.062743	0.147388
Aves	Corvus_moneduloides	33	0.0622097	0.146135
Aves	Corvus_moneduloides	34	0.0627954	0.147511
Aves	Corvus_moneduloides	35	0.0619678	0.145567
Aves	Corvus_moneduloides	36	0.0608195	0.142869
Aves	Corvus_moneduloides	37	0.0607991	0.142822
Aves	Corvus_moneduloides	38	0.0601988	0.141411
Aves	Corvus_moneduloides	39	0.0601842	0.141377
Aves	Corvus_moneduloides	40	0.0593419	0.139398
Aves	Corvus_moneduloides	41	0.0586746	0.137831
Aves	Corvus_moneduloides	42	0.0589951	0.138584
Aves	Corvus_moneduloides	43	0.0595372	0.139857
Aves	Corvus_moneduloides	44	0.0602133	0.141445
Aves	Corvus_moneduloides	45	0.0599656	0.140864
Aves	Corvus_moneduloides	46	0.0592312	0.139138
Aves	Corvus_moneduloides	47	0.0589485	0.138474
Aves	Corvus_moneduloides	48	0.0599744	0.140884
Aves	Corvus_moneduloides	49	0.0589572	0.138495
Aves	Corvus_moneduloides	50	0.0587154	0.137927
Aves	Corvus_moneduloides	51	0.0586833	0.137851
Aves	Corvus_moneduloides	52	0.0591117	0.138858
Aves	Corvus_moneduloides	53	0.0583365	0.137037
Aves	Corvus_moneduloides	54	0.0581558	0.136612
Aves	Corvus_moneduloides	55	0.0586512	0.137776
Aves	Corvus_moneduloides	56	0.0581733	0.136653
Aves	Corvus_moneduloides	57	0.0580072	0.136263
Aves	Corvus_moneduloides	58	0.0583365	0.137037
Aves	Corvus_moneduloides	59	0.0580363	0.136331
Aves	Corvus_moneduloides	60	0.0577711	0.135708
Aves	Corvus_moneduloides	61	0.0580421	0.136345
Aves	Corvus_moneduloides	62	0.0585114	0.137447
Aves	Corvus_moneduloides	63	0.0577915	0.135756
Aves	Corvus_moneduloides	64	0.0587707	0.138057
[truncated: 9,736 more rows]

## Sheet: G4 density in gene body
clade	species	bin_num	count	normalized_density
[truncated: 10,500 more rows]
