# Supplementary material for: CGGBP1-regulated heterogeneous C–T transition rates relate with G-quadruplex potential of terrestrial vertebrate genomes
Source: bioRxiv preprint, doi:10.64898/2025.12.10.693595, version 2 (2026-03-24)
Supplement: Table S15 [file 693595_file43.xlsx]

## Sheet: A_to_C
Motif

## Sheet: A_to_G
Motif

## Sheet: A_to_T
Motif

## Sheet: C_to_A
Motif

## Sheet: C_to_G
Motif

## Sheet: C_to_T
Motif

## Sheet: G_to_A
Motif

## Sheet: G_to_C
Motif

## Sheet: G_to_T
Motif

## Sheet: T_to_A
Motif

[truncated: 2 more sheets: T_to_C, T_to_G]
