# Supplementary material for: CGGBP1-regulated heterogeneous C–T transition rates relate with G-quadruplex potential of terrestrial vertebrate genomes
Source: bioRxiv preprint, doi:10.64898/2025.12.10.693595, version 2 (2026-03-24)
Supplement: Table S16 [file 693595_file44.xlsx]

## Sheet: Motifs in G4s genomewide
Motif_ID	Motif_Name	Erpetoichthys_calabaricus	Latimeria_chalumnae	Leptobrachium_leishanense	Xenopus_tropicalis	Anolis_carolinensis	Chelonoidis_abingdonii	Chelydra_serpentina	Chrysemys_picta	Crocodylus_porosus	Gopherus_evgoodei	Laticauda_laticaudata	Naja_naja	Notechis_scutatus	Pelodiscus_sinensis	Pelusios_castaneus	Podarcis_muralis	Pseudonaja_textilis	Salvator_merianae	Sphenodon_punctatus	Terrapene_carolina	Varanus_komodoensis	Amazona_collaria	Anas_platyrhynchos	Apteryx_haastii	Aquila_chrysaetos	Athene_cunicularia	Cairina_moschata	Calidris_pugnax	Catharus_ustulatus	Corvus_moneduloides	Coturnix_japonica	Ficedula_albicollis	Gallus_gallus	Geospiza_fortis	Manacus_vitellinus	Meleagris_gallopavo	Nothoprocta_perdicaria	Numida_meleagris	Parus_major	Pavo_cristatus	Phasianus_colchicus	Serinus_canaria	Stachyris_ruficeps	Strigops_habroptila	Strix_occidentalis	Struthio_camelus	Taeniopygia_guttata	Zonotrichia_albicollis
MA0002.3	Runx1	2913	6840	6939	4862	1318	9047	9468	8178	13946	9609	1967	2504	1638	9792	8366	3510	1811	1932	24181	8516	2637	2287	2555	1536	2672	2255	2384	3459	4475	2971	2490	3595	2964	2884	3412	2340	1205	2179	2358	2234	2409	3486	3075	2532	2907	1358	3608	2922
MA0003.5	TFAP2A	18307	44222	80838	110387	17613	89224	99982	99831	64566	105869	13393	37907	17564	90504	70740	22708	17685	13142	193400	111946	35166	16589	28734	21636	31114	17614	30899	32904	40257	35662	11258	26018	18379	22110	35186	11278	18260	15817	22855	16950	13287	29837	28134	18649	30819	12613	36983	19991
MA0004.1	Arnt	0	0	0	0	0	0	0	0	0	0	0	0	0	0	0	0	0	0	0	0	0	0	0	0	0	0	0	0	0	0	0	0	0	0	0	0	0	0	0	0	0	0	0	0	0	0	0	0
MA0006.2	Ahr::Arnt	0	0	0	0	0	0	0	0	0	0	0	0	0	0	0	0	0	0	0	0	0	0	0	0	0	0	0	0	0	0	0	0	0	0	0	0	0	0	0	0	0	0	0	0	0	0	0	0
MA0007.4	Ar	687	3130	4940	4790	667	5272	6944	7288	4184	6426	771	840	930	5745	4562	1855	827	1139	12390	7877	1871	1790	3128	1753	3102	2229	3016	3967	3983	3414	1678	3281	2261	2621	3303	1744	2018	2180	2504	1896	1917	3412	2972	3514	3034	1082	4017	2402
MA0009.2	TBXT	732	866	3218	1051	354	1127	1295	1266	1656	1174	555	613	556	1509	936	568	506	393	4680	1344	655	379	591	377	628	394	537	892	1229	1905	380	1364	539	729	687	624	399	636	732	463	684	850	717	451	746	258	1320	661
MA0014.4	PAX5	3097	2254	7629	2584	1301	5554	12478	7368	4939	6260	2489	5008	4478	6868	5271	2580	3871	2078	23245	7861	3548	1771	3010	2352	3304	1499	3551	3265	4496	4266	1962	2684	3362	1903	2744	2452	2511	3086	2271	2434	2994	2544	3490	2494	3359	1150	5100	1534
MA0017.3	NR2F1	14495	14532	23267	7235	4256	21853	23995	25508	20553	27202	7555	17637	9728	20702	21447	7713	9333	5488	69825	27251	7200	3943	5544	3090	5493	4150	5953	7676	13707	8957	10516	8200	13018	5656	12143	10473	2649	7056	5682	4532	11398	7759	7362	5506	6593	2738	14532	4874
MA0018.5	CREB1	10616	1133	2555	4441	682	1547	2469	1623	1425	1927	941	1119	1018	2339	1072	1097	957	520	4593	1696	555	470	514	304	491	333	654	666	1126	837	594	687	779	510	1494	1355	370	595	582	520	710	898	748	491	575	189	1228	490
MA0019.2	Ddit3::Cebpa	1076	4687	12178	3208	2044	7771	8027	8468	6297	8121	3244	3901	3711	6816	4807	3561	3565	2021	18864	8588	3429	1516	1629	1662	2206	1383	1707	2713	2403	1870	1593	2268	2088	1856	2201	1524	1374	2138	1470	1534	1811	2391	1770	1560	1991	1272	2063	1666
MA0024.3	E2F1	1031	1549	2463	2284	894	3437	4348	3629	1478	4096	575	736	744	4531	2065	2386	708	682	6881	3941	1493	623	607	878	544	319	730	674	546	607	497	489	652	446	347	394	1038	430	315	511	498	346	498	484	705	399	700	333
MA0025.3	NFIL3	210	1204	739	475	346	377	424	440	314	421	280	346	321	469	384	626	315	168	2197	469	617	100	136	74	109	71	129	126	113	111	142	100	117	179	118	86	74	91	99	98	98	164	124	85	91	79	155	157
MA0027.3	EN1	0	0	0	0	0	0	0	0	0	0	0	0	0	0	0	0	0	0	0	0	0	0	0	0	0	0	0	0	0	0	0	0	0	0	0	0	0	0	0	0	0	0	0	0	0	0	0	0
MA0028.3	ELK1	6401	2035	6534	1693	1192	3164	4891	4133	2285	3146	1381	997	1717	4207	3025	1670	1363	1138	12014	4617	2177	743	452	580	599	203	620	752	1303	826	1246	489	1029	249	814	610	403	709	424	863	988	644	607	615	603	328	812	244
MA0029.2	Mecom	343	1700	1597	577	351	1051	1054	1153	1145	992	460	392	637	3078	754	499	476	376	6015	1184	452	2032	764	223	316	415	776	1561	445	516	494	413	1012	394	1059	3109	173	365	339	382	775	445	388	2705	450	203	411	318
MA0030.2	FOXF2	467	1389	2148	701	356	906	1117	1078	1060	1005	274	249	373	762	765	649	281	312	4577	1121	377	275	263	233	301	260	265	344	437	348	407	413	691	330	342	305	251	171	254	220	349	373	436	299	367	215	422	284
MA0031.2	FOXD1	2070	1240	1640	534	309	961	1023	893	921	1044	221	207	305	721	644	588	230	314	3814	893	314	232	190	207	243	214	199	281	260	237	243	222	813	200	256	331	226	199	178	240	359	235	287	227	333	140	280	162
MA0032.2	FOXC1	204	771	1209	1593	498	349	493	488	371	360	171	145	219	386	328	453	155	219	1911	533	165	114	127	124	116	111	153	151	121	98	120	102	244	112	135	81	76	83	85	74	85	128	174	91	105	97	117	88
MA0033.2	FOXL1	2070	1240	1640	534	309	961	1023	893	921	1044	221	207	305	721	644	588	230	314	3814	893	314	232	190	207	243	214	199	281	260	237	243	222	813	200	256	331	226	199	178	240	359	235	287	227	333	140	280	162
MA0035.5	GATA1	271	829	2547	915	1132	1091	1176	1074	783	1016	514	515	570	1061	3247	658	542	347	4842	1097	704	120	173	166	228	127	169	251	165	212	171	167	193	145	218	152	107	123	119	97	127	196	162	120	152	166	203	120
MA0036.4	GATA2	357	1211	2698	1100	476	1564	1653	1579	1549	1637	675	555	771	1375	932	930	742	428	7437	1662	458	340	392	382	452	265	392	476	389	382	455	322	309	362	316	265	226	301	283	249	284	479	317	326	386	259	541	305
MA0037.5	Gata3	384	1140	2705	1056	473	1552	1665	1569	1266	1611	616	555	681	1381	875	920	663	433	7043	1656	479	343	415	401	458	282	412	506	403	398	481	320	324	373	328	299	219	308	303	262	302	492	331	337	403	264	514	315
MA0038.3	GFI1	597	2973	4215	1367	957	2868	3162	3541	2689	2993	1279	1183	2303	3067	1969	1109	2076	744	5771	3667	2452	500	549	473	593	403	506	805	1665	667	513	829	563	701	824	506	264	462	547	400	635	902	755	499	527	365	1156	679
MA0039.5	KLF4	206127	228713	193522	260899	199319	345081	294181	458836	322247	387522	307318	380375	392962	383025	269087	418799	397489	260722	0	0	350467	140437	155220	127216	237406	132538	166487	213789	251468	203359	135724	144110	189439	123388	202937	112120	75999	128053	131859	132515	134902	162677	164041	143306	221095	108548	221636	108550
MA0040.2	Foxq1	1877	881	1453	2160	241	821	847	903	501	847	186	178	179	523	593	758	203	247	2735	1023	279	210	257	151	234	176	280	289	228	202	294	181	254	191	306	187	70	243	138	118	219	214	214	230	426	141	175	180
MA0041.3	FOXD3	247	3602	2094	665	733	908	1503	1098	1193	1061	397	267	470	975	1041	818	405	663	3659	1280	357	510	360	502	701	477	429	514	679	606	268	556	328	559	716	168	167	184	467	177	209	632	774	782	423	314	676	500
MA0042.2	FOXI1	2070	1240	1640	534	309	961	1023	893	921	1044	221	207	305	721	644	588	230	314	3814	893	314	232	190	207	243	214	199	281	260	237	243	222	813	200	256	331	226	199	178	240	359	235	287	227	333	140	280	162
MA0043.4	HLF	157	1320	701	422	349	380	419	466	350	412	186	194	165	494	318	435	174	146	1936	498	650	102	160	91	119	103	165	129	119	110	158	97	108	169	113	74	90	109	110	94	104	142	178	93	121	85	137	160
MA0046.3	HNF1A	241	364	2264	423	125	241	251	259	141	222	96	86	96	272	201	179	115	97	942	366	76	59	90	79	80	59	95	101	148	89	161	68	156	58	157	63	47	45	74	55	105	93	105	86	91	44	299	94
MA0047.4	FOXA2	2088	1287	3443	706	548	1036	1042	952	977	1111	238	210	332	746	696	642	253	461	4289	987	344	221	200	217	265	224	214	305	261	267	241	250	451	227	288	245	233	200	207	203	276	223	314	237	343	152	306	179
MA0048.3	NHLH1	4560	16259	23408	18570	6516	31539	36570	43093	40567	36817	9588	20469	10003	52408	29137	14121	7661	7059	87705	46577	15358	7365	12104	9196	13847	10666	12040	12732	18183	14490	8170	15880	12538	13304	14393	10760	7224	11345	12192	10649	10372	15287	13186	7320	14218	6142	15732	11983
MA0050.4	Irf1	685	4362	4884	1131	1172	2645	3392	2936	2461	2667	1487	1353	1827	2640	1667	1999	1827	1149	6569	3223	1370	943	715	648	724	558	756	1302	1089	857	674	830	719	772	815	529	432	591	579	589	656	1071	722	996	729	582	1103	828
MA0051.2	IRF2	611	2572	3898	5019	2465	2149	2676	2183	2227	8925	1961	1435	2677	3188	1717	2071	2381	1845	9979	2464	1590	1337	1845	1080	1277	1713	2124	1497	2415	2183	1777	8032	2160	1900	2309	1225	1218	1657	1474	1079	1702	2317	1287	1510	1210	918	2889	1680
MA0052.5	MEF2A	451	2609	4915	883	833	2171	2307	2260	1492	3063	556	620	681	1465	911	2013	639	537	4451	2566	565	348	425	463	433	249	476	587	1473	714	563	726	442	628	658	277	219	231	334	234	357	1244	586	389	429	276	2427	541
MA0056.3	MZF1	14770	35897	41140	36925	16945	54267	68877	64617	38401	61777	14120	16312	14330	51514	34223	17641	14993	10021	147693	66382	15209	14106	15680	9531	16403	10030	16076	21659	50282	25361	20480	24764	24023	22292	23188	15734	8183	14934	16783	13456	18327	32501	20817	16938	15511	7632	60642	19623
MA0058.4	MAX	0	0	0	0	0	0	0	0	0	0	0	0	0	0	0	0	0	0	0	0	0	0	0	0	0	0	0	0	0	0	0	0	0	0	0	0	0	0	0	0	0	0	0	0	0	0	0	0
MA0059.2	MAX::MYC	1541	3299	12674	1435	989	4764	12011	5849	7824	4743	1131	1178	1550	8214	5370	2123	1214	1272	22084	6404	3135	1153	2193	2166	2282	1446	2434	2536	1981	2372	1299	1367	2099	1237	2211	1541	2390	2137	1354	1935	1807	1820	1614	1357	6397	1089	2158	1427
MA0060.4	NFYA	2138	4876	6554	3841	1476	6197	6764	7028	6961	6527	3650	2502	5255	5306	7370	2254	6876	2432	21707	7359	1450	816	696	541	664	436	668	867	1198	2053	1287	699	1147	906	966	769	513	671	674	664	1004	1201	798	867	719	395	1216	903
MA0062.4	GABPA	4961	8170	38864	9687	4933	28063	30560	31897	22763	31387	6422	6500	7310	30662	18919	10195	7414	7347	64966	32696	11338	5362	5931	4299	4946	4664	6008	8631	7259	6141	4609	5745	4947	5350	8323	4306	3548	4292	4813	4344	4244	6501	5395	5023	6559	3514	6290	4881
MA0063.3	NKX2-5	652	1166	2122	821	483	2184	3479	2635	1862	2267	637	563	557	2797	1673	1006	565	424	7969	2760	868	301	237	234	335	310	253	445	560	493	408	356	432	383	496	329	196	263	335	286	345	460	367	323	427	231	553	327
MA0065.3	Pparg::Rxra	21633	79120	102629	52192	28349	153037	183913	186743	150171	174217	41621	53898	50739	183950	118815	58597	49296	35633	411417	205790	52532	28624	37907	32301	40772	30764	39063	47465	51419	46672	24742	40917	32885	34952	51793	24749	23467	27630	31424	24092	25621	44535	36620	32017	45324	26419	53288	30914
MA0066.2	PPARG	2428	4926	6245	4440	1314	12893	9927	10878	9151	25348	1175	1850	1485	9326	22364	3617	1656	1342	24295	11812	2884	1819	2738	1702	2483	1557	2602	4359	3204	2872	3032	2640	2758	2404	4173	3277	1694	2226	2024	1622	2918	2787	2272	2102	2898	1367	3525	2176
MA0067.3	PAX2	957	1092	3061	1112	1407	2977	4355	4366	2556	3510	1277	963	2127	3244	2951	1465	1393	938	8072	4336	1926	1434	2027	1712	2678	899	2288	1957	4948	2120	1233	1442	1836	783	1574	807	1808	1499	1440	1613	1525	1292	1782	1849	2333	842	2403	814
MA0068.2	PAX4	152	198	704	512	108	291	420	335	706	259	278	338	388	348	245	221	359	130	804	324	124	68	217	85	105	60	262	195	231	126	500	183	318	155	115	203	69	102	132	101	229	267	207	102	126	52	379	104
MA0069.1	PAX6	258	427	928	353	207	670	738	640	518	823	916	1011	1400	687	998	306	1235	197	2595	721	393	161	139	174	249	169	147	223	270	204	127	161	152	129	158	116	121	140	140	133	128	159	171	190	217	107	228	157
MA0070.2	PBX1	785	910	2450	803	302	1179	1391	999	589	1399	362	380	283	1531	567	443	311	277	2444	994	296	166	124	100	183	142	127	273	368	217	289	272	198	208	215	136	87	110	268	104	178	301	220	174	178	112	268	204
MA0071.1	RORA	1246	3140	3943	1109	1166	3187	4086	3810	2643	3579	1748	2183	2125	3006	2457	1595	1977	946	14153	3994	1122	751	704	496	813	563	664	1579	1564	1015	1863	1000	1583	844	1474	1113	444	731	701	595	1272	1101	1107	850	907	479	1916	862
MA0072.2	RORA	522	2185	1323	1164	581	1932	2059	2006	3249	2290	905	1049	1110	2062	1492	834	1084	653	7791	1975	638	458	347	308	452	336	400	695	769	472	1038	612	713	459	647	998	249	540	419	354	731	679	472	599	580	251	1042	440
MA0073.2	RREB1	366273	337507	258066	362102	210808	287759	496091	383113	251048	314467	248692	230466	387499	285661	464048	278635	369791	137825	275175	251839	269801	185641	212577	109215	386030	151945	225147	242780	245749	214085	218394	3346	368706	115309	170678	110210	53316	120911	100759	119101	184472	161542	139313	209971	274534	112932	321957	93288
MA0074.1	RXRA::VDR	13189	4853	11389	5181	1962	14414	15188	14855	7131	15469	1867	2779	1885	11016	6095	3157	2422	1561	24113	15975	2168	3369	2876	1506	2641	1622	3066	3710	6397	4079	11109	3840	7523	2807	5103	6560	1479	3756	2318	2079	7893	3746	3691	3568	3189	1271	7867	2600
MA0075.4	PRRX2	291	396	1155	1008	169	482	655	527	881	446	379	433	507	460	394	293	469	184	1404	548	184	108	315	116	164	89	389	297	313	236	803	233	562	227	196	348	114	142	189	154	420	362	252	158	192	92	496	154
MA0076.3	ELK4	7170	2884	9600	2652	2011	7944	12305	9746	5119	7838	2301	1923	2770	8539	6668	3346	2477	2484	28046	10566	4489	2404	1137	1454	1274	645	1349	1707	2475	1801	1739	1607	1738	874	1825	1192	1161	1338	1077	1525	1583	1466	1431	1485	1521	777	1882	808
MA0077.2	SOX9	629	2057	3557	3141	715	1883	2403	2063	1769	2051	716	908	703	2220	5497	1282	749	793	13406	2148	949	635	418	209	334	257	398	451	1508	562	2657	915	1155	604	479	888	216	748	466	365	1208	700	500	628	286	217	1178	847
MA0078.3	Sox17	1513	8058	7501	3762	1636	5014	6040	5600	3675	5137	1801	1923	1927	5264	6981	2953	1911	2161	23058	5739	2231	2050	1375	707	1141	921	1460	1882	3147	2077	3123	2026	3460	2064	2897	2783	965	3356	1349	1337	3357	2183	1716	1952	1481	732	3108	1983
MA0079.5	SP1	82897	277513	349706	159855	129089	442100	359517	312120	348581	491691	174317	380288	234266	271862	354874	251152	231158	420687	188537	342831	210316	358407	386980	289339	179623	234227	417585	326641	341919	336672	256909	98155	425497	127470	241043	127462	163598	221670	166618	221086	252733	178017	221130	303787	475124	235809	314569	119364
MA0080.7	Spi1	14201	45239	83556	20753	34376	71837	75282	78255	71387	78998	46955	41616	56841	104842	52609	41972	59257	28919	250063	82124	35835	23111	26381	20414	25431	17447	27449	30126	25250	24995	19137	21733	22390	20018	27253	16363	15502	18900	18710	15581	18379	23071	19584	26459	25493	17540	27023	18592
MA0081.3	SPIB	11565	38177	51580	19349	22840	61086	65314	70273	61741	68567	30327	26557	34598	89759	46051	31364	36068	21138	210572	71619	25398	18597	17234	15323	18771	13829	17665	21644	20004	18922	15692	16678	18502	15096	22385	13715	11383	13734	13734	12294	14799	17829	14478	18651	19829	13165	20956	13915
MA0083.3	SRF	467	1617	4649	2320	950	1291	1520	1572	1578	1504	548	490	510	1480	1313	1279	494	568	6264	1666	711	392	435	279	418	214	515	1329	913	557	3523	440	1441	496	634	682	255	410	272	376	1594	685	422	564	375	233	1098	483
MA0084.2	SRY	2090	1420	1871	1696	466	965	1228	1223	810	999	428	426	669	899	786	923	449	464	4360	1400	577	224	231	229	281	229	248	264	458	288	266	319	263	332	517	176	105	285	280	147	234	405	330	223	246	186	462	344
MA0087.3	Sox5	800	2670	4204	2141	915	2886	3235	3115	2175	2995	968	1160	894	2872	2639	1743	876	1551	13213	3463	1167	1011	756	323	624	520	843	1119	2271	1286	1973	1379	2346	1344	1831	1764	621	2330	799	677	2118	1395	1040	1097	733	348	2207	1377
MA0088.3	ZNF143	4850	8267	20684	33471	4857	26301	34142	31528	21192	29937	8725	9437	6820	24770	19890	7933	7405	4586	70415	37542	8114	6800	6899	4794	8018	5207	7433	10139	12216	9495	6328	7984	7865	6997	8873	5628	4242	5974	6527	5396	6236	9714	7615	6493	8151	3455	12779	6676
MA0089.3	MAFG::NRF1	514	1438	1769	876	432	2297	2685	2602	2055	2554	610	893	523	2404	1650	836	519	560	5237	2626	655	609	624	439	822	604	583	907	1206	864	484	917	657	712	1312	498	469	584	648	580	528	971	861	560	870	352	993	708
MA0090.4	TEAD1	1175	2792	9021	3770	1333	5045	5024	5520	3242	5843	1511	1805	1880	6854	4120	6062	1799	1655	12657	5770	3533	1302	630	540	749	672	602	1145	2565	2052	732	2081	841	1857	3153	809	722	698	1649	680	772	2377	1853	966	798	406	2741	1913
MA0091.2	TAL1::TCF3	1633	6454	4550	1751	2379	4051	4742	4743	5023	4311	1701	2341	2083	4778	5828	6534	1813	1187	15465	5078	1996	744	1093	936	1176	987	1006	1724	1442	1257	974	1243	1155	1193	1853	965	601	761	1071	775	937	1351	1328	811	1298	680	1329	1155
MA0092.2	Hand1::Tcf3	1494	4638	13184	1699	1127	5402	5142	5587	5001	6470	1551	1919	1931	8413	4387	2267	1769	1438	22144	5909	1876	963	1105	942	1583	1440	1125	1874	1853	1527	740	1573	790	1378	1718	917	630	742	1230	747	806	1736	1370	1053	2258	750	1785	1236
MA0093.4	USF1	1594	5215	8678	2096	1084	6013	8425	7578	9417	6424	2215	3362	3373	7578	4963	2814	3027	1256	20881	8230	2291	851	1044	1103	1523	818	1151	1580	1843	1796	1091	1365	1864	1016	1736	1914	985	1514	1039	1094	1721	1768	1420	977	1651	675	1720	1022
MA0095.4	Yy1	4895	29344	9239	16288	4553	5800	6181	6076	6816	5810	4108	5775	4874	8156	5627	6691	4719	4623	21858	6774	4284	1678	2489	1621	2503	1496	2521	3422	7133	2924	4230	3687	4203	4884	12673	2676	1502	2054	1949	1771	4068	7348	3096	2101	2712	1379	15161	4357
MA0098.4	ETS1	3863	1512	8245	1560	1401	3006	4341	3487	2459	2812	662	756	1352	3360	2789	1342	1002	950	10136	3915	1365	558	341	497	448	245	453	728	1324	642	1068	541	803	355	606	535	362	544	404	643	789	716	597	526	538	319	853	346
MA0099.4	FOS::JUN	312	1643	1371	1399	378	1564	1858	1819	1369	1612	242	340	296	1609	1153	575	279	495	4653	1920	429	312	315	289	417	287	331	544	527	427	282	468	380	325	541	271	239	321	360	345	266	454	459	322	470	200	491	361
MA0100.4	MYB	0	0	0	0	0	0	0	0	0	0	0	0	0	0	0	0	0	0	0	0	0	0	0	0	0	0	0	0	0	0	0	0	0	0	0	0	0	0	0	0	0	0	0	0	0	0	0	0
MA0101.1	REL	3933	13603	26112	9837	5165	17197	23705	21071	14173	24102	6979	7967	10917	17683	13815	11821	10266	6418	64470	24138	11852	4505	5293	4818	6724	3871	5569	8208	12267	11417	3377	8363	5813	7603	11557	3265	3895	3788	7219	3654	3856	10558	10187	4728	6057	2966	14784	6850
MA0102.5	CEBPA	237	1149	1002	748	497	856	797	947	918	852	406	413	417	1203	765	716	427	486	2759	1038	685	241	307	215	300	240	288	418	336	308	309	222	538	262	293	241	181	252	196	227	268	259	224	272	332	211	279	243
MA0103.4	ZEB1	0	0	0	0	0	0	0	0	0	0	0	0	0	0	0	0	0	0	0	0	0	0	0	0	0	0	0	0	0	0	0	0	0	0	0	0	0	0	0	0	0	0	0	0	0	0	0	0
MA0104.5	MYCN	2088	7570	22194	2140	1568	6600	20012	9230	7194	7470	2124	2650	2904	10916	7580	2618	2606	2260	26952	9718	5630	2040	4780	4668	4670	2462	5144	4966	5184	4366	2776	3040	5446	2444	4184	4120	6492	5294	2756	4232	4856	3174	3598	2332	13392	2224	4020	2196
MA0105.4	NFKB1	23063	35704	44080	48891	8295	59265	81534	67836	49867	71207	12978	16008	19247	63740	54524	31688	19060	10341	222928	76598	26038	19457	30460	18624	41303	19947	32644	46896	42660	37289	12955	28866	17335	20923	37869	10444	18733	17618	24098	14397	13836	28433	30535	25055	35801	10713	46171	16063
MA0106.3	TP53	467	1281	3999	1525	365	2898	2941	2919	5519	2877	912	935	842	3078	2785	1288	948	743	10645	3188	1782	898	762	962	1206	803	766	1266	1231	1320	401	944	635	791	950	621	900	713	707	605	670	992	930	1142	1345	655	1262	740
MA0107.1	RELA	3009	19726	22196	8310	4833	23413	29965	27613	18088	27116	6067	8034	9198	24111	18092	43756	8706	5274	94390	32171	15528	5344	6818	5997	9030	5009	7061	10694	18603	14749	3974	13437	6504	11131	14748	4354	5326	4793	10764	4646	5156	14757	14262	7393	7909	3619	21157	8877
MA0108.3	TBP	0	0	0	0	0	0	0	0	0	0	0	0	0	0	0	0	0	0	0	0	0	0	0	0	0	0	0	0	0	0	0	0	0	0	0	0	0	0	0	0	0	0	0	0	0	0	0	0
MA0111.1	Spz1	5235	19672	59127	25245	5675	36331	39878	41347	28300	44500	6966	13799	7540	37595	25581	9921	8129	8397	135375	44818	9872	8552	8923	6734	10404	7594	9370	11321	10497	11501	6209	9758	7240	7648	10691	5971	5320	5906	7173	5796	5869	9737	8378	7915	9599	5322	10480	6763
MA0112.4	ESR1	4681	6893	17042	8074	2566	13729	14718	13336	11174	14579	2530	3732	3835	11378	11727	5157	2977	3825	31469	14124	4009	3324	5092	4059	5911	3247	5491	7646	8586	6600	3924	6112	5802	4727	6219	4151	4001	5264	4486	3794	5168	6332	6023	4555	6504	3389	8748	4180
MA0113.4	NR3C1	633	2926	3016	4212	523	4002	4782	5001	2859	4623	592	668	805	4258	2740	1411	704	1019	9185	5325	1237	1184	1659	1249	1946	1654	1634	2891	2432	2161	1151	2129	1417	1798	2299	2056	1307	1412	1583	1177	1285	2036	2003	2879	2061	759	2439	1632
MA0114.5	HNF4A	3213	5755	8822	2951	2221	7412	13338	11783	5260	7971	2592	3079	3244	6602	5036	3220	2911	1973	20992	13287	3754	1211	1429	1116	1585	1259	1401	2699	2970	2305	1642	2140	2194	2096	2919	1990	867	1787	1664	1661	2115	2838	2077	1268	1662	924	3540	1944
MA0115.1	NR1H2::RXRA	1421	3939	4495	2553	1001	5193	4787	5083	7946	5634	1223	1858	1332	4239	5593	1912	1499	1221	14509	5314	1877	903	1093	867	1090	873	1091	1817	2171	2446	983	1535	1484	1259	1662	1281	726	1251	1180	836	1194	1761	1488	973	1304	1286	2067	1077
MA0116.2	ZNF423	30931	66131	98081	66626	24100	166144	206153	182867	107301	239295	28104	51191	34013	159386	128501	46476	34151	24422	423267	212844	56783	44229	70945	51099	77898	40572	78676	90164	95500	82102	26391	64571	43259	49823	79422	27333	50107	40380	55971	36867	31605	68461	70261	47213	79432	27571	100051	41399
MA0117.3	Mafb	364	1880	1734	840	483	1581	1610	1663	2026	1642	335	729	457	1538	1502	874	451	415	4320	1694	613	403	461	353	500	402	467	665	856	589	457	558	515	517	509	582	264	359	484	404	476	512	500	384	488	302	581	458
MA0119.1	NFIC::TLX1	2263	4005	6843	5040	1771	16654	17666	18150	17510	18058	2335	3429	3411	18074	25138	4355	2542	2851	37575	18817	5807	2828	5102	3637	4868	7328	5192	5882	6880	4747	2024	4467	2810	4040	5216	2223	2836	3193	3699	2792	2370	6376	4011	3092	9944	2298	4943	3768
MA0122.4	Nkx3-2	362	1425	1195	1392	308	1100	1329	1189	1473	1023	391	376	417	1538	1024	648	463	361	4259	1306	515	230	198	207	270	173	242	303	192	201	518	161	279	180	263	176	144	160	168	162	261	204	198	198	283	197	239	143
MA0124.3	Nkx3-1	812	3194	2151	3049	693	4911	6124	8870	3832	5259	1210	1279	1069	13505	2740	1414	1161	907	9784	10878	1151	489	468	481	575	389	526	685	648	487	1088	392	829	366	743	490	316	466	385	443	747	514	435	508	592	465	576	325
MA0125.2	Nobox	0	0	0	0	0	0	0	0	0	0	0	0	0	0	0	0	0	0	0	0	0	0	0	0	0	0	0	0	0	0	0	0	0	0	0	0	0	0	0	0	0	0	0	0	0	0	0	0
MA0130.1	ZNF354C	0	0	0	0	0	0	0	0	0	0	0	0	0	0	0	0	0	0	0	0	0	0	0	0	0	0	0	0	0	0	0	0	0	0	0	0	0	0	0	0	0	0	0	0	0	0	0	0
MA0131.3	HINFP	4406	3357	12010	4103	1632	8059	11480	11015	4883	9422	2383	5595	3098	11444	5911	4859	2767	3154	37050	14087	5411	4300	7204	7522	10295	3162	8494	7778	9806	7743	3820	4578	8082	3056	4458	5638	6902	6990	4175	6037	6579	4142	5732	4792	7785	3696	7273	2450
MA0132.3	PDX1	0	0	0	0	0	0	0	0	0	0	0	0	0	0	0	0	0	0	0	0	0	0	0	0	0	0	0	0	0	0	0	0	0	0	0	0	0	0	0	0	0	0	0	0	0	0	0	0
MA0135.2	Lhx3	131	544	4098	216	147	239	331	323	211	234	161	115	136	281	202	257	127	140	1876	378	95	64	105	94	98	58	154	135	185	76	219	112	93	97	104	79	63	44	80	59	84	147	94	93	104	67	335	87
MA0136.4	Elf5	3352	6761	12814	7636	11661	15756	15069	15666	14214	16796	13397	11266	15736	23036	12197	11284	16458	8340	58217	16671	8227	4647	3873	4272	5033	3300	4029	5502	4146	4620	4710	3796	4421	3974	5239	3213	3127	3267	3406	3242	3452	4250	3488	4333	4226	4245	4394	3169
MA0137.4	STAT1	1119	2639	3062	3718	1198	4181	5673	4490	3528	4843	1429	1399	2201	7204	3109	2217	2389	1494	10681	4316	2480	1773	1119	970	1331	940	1112	1999	3047	2378	832	2528	977	1831	3173	1316	942	838	1685	884	861	2580	1868	974	1267	807	2595	1862
MA0138.3	REST	3610	20489	23047	7109	2043	20140	28997	25322	20302	26591	2606	4246	2588	29691	48758	6255	3233	3707	56759	27144	7067	7301	9497	7004	10036	6265	10169	11375	17780	10765	4593	11623	6637	8634	10905	4491	7075	6316	8827	6039	5046	10453	10174	7426	10318	4145	13493	7491
MA0139.2	CTCF	39331	29042	40153	22877	8457	52370	70096	71397	48272	63724	10038	17553	12750	58726	47906	18629	13276	16469	180080	80899	22158	16754	18791	12239	16443	9145	20617	21855	24749	17822	10490	15567	15189	11801	18527	11148	11016	12734	13001	12550	12256	15879	15648	12246	16135	7255	22191	10217
MA0140.3	GATA1::TAL1	293	890	2108	1775	295	1636	1635	1737	1485	1635	392	406	361	1812	1108	549	385	427	4792	1723	435	334	309	228	320	245	311	377	388	313	406	333	296	261	351	307	170	233	280	229	282	394	303	306	328	209	394	253
MA0141.4	ESRRB	2391	2068	2638	1262	1298	2260	3749	2499	2918	2299	1337	2122	1370	2259	2676	1552	1517	1414	10891	2522	1433	686	684	622	908	661	698	1861	1153	1019	633	1046	772	812	2117	616	536	645	788	593	726	1040	939	860	939	532	1473	901
MA0142.1	Pou5f1::Sox2	171	1321	3600	500	257	447	521	589	495	481	323	321	294	612	447	827	302	315	2244	618	437	162	164	146	242	147	151	209	202	168	146	186	447	159	197	137	119	138	137	123	162	192	163	184	232	112	203	172
MA0143.5	SOX2	1227	3840	5332	4221	1180	3640	4270	3951	2961	3874	1167	1279	1082	3878	7904	2114	1094	1375	25461	4239	1495	1568	935	397	805	599	1033	1407	2573	1500	3038	1521	3311	1599	2153	2457	803	2944	939	981	3138	1661	1175	1511	938	423	2455	1567
MA0144.3	STAT3	2466	3713	3814	3376	2025	5674	7706	6049	4622	6534	2088	1967	2805	6810	3975	3019	3183	1820	43993	6037	3375	2113	1544	1370	1845	1295	1518	2674	5589	3516	1018	3941	1295	3086	7245	1147	1261	1142	2570	1157	1101	4809	3345	1374	1731	1144	6100	3121
MA0145.2	Tfcp2l1	3637	24656	21743	17262	4505	37465	42106	42160	38210	47075	7153	9279	8432	42736	40021	8740	8949	6003	72756	45435	17429	10796	14194	12078	18669	9928	15506	21752	33035	21378	6881	19719	10536	13506	24681	6658	9584	10009	15157	9231	7899	19139	17029	11263	17543	6287	28728	14080
MA0146.3	Zfx	9748	19253	81725	11273	9631	41417	54481	52938	34891	49128	7110	9393	8555	53596	38838	10966	9004	7392	93758	58799	18337	9693	10532	11703	12000	6735	11595	11809	14250	13587	5785	7369	8598	7304	11132	4284	11483	7605	8610	7839	5776	10537	11715	8257	13332	6208	11831	8018
MA0147.4	MYC	2201	10494	29432	3403	1476	8137	11157	10500	11191	9146	2895	3642	3835	12057	8782	3234	3349	2520	40457	11054	6087	2349	4346	3942	4262	2620	4601	4760	3668	3957	2668	3029	4624	2799	4676	3647	4949	4450	2716	3796	4016	3330	3282	2885	5432	2087	3483	2565
MA0148.5	FOXA1	2070	1240	1640	534	309	961	1023	893	921	1044	220	207	305	721	644	588	230	314	3813	893	314	232	190	206	243	214	199	281	260	237	243	222	813	200	256	331	226	199	178	240	359	235	287	227	332	140	280	162
MA0149.1	EWSR1-FLI1	51788	208609	291774	114369	133645	314221	382305	393270	320016	364285	226064	202053	289044	441732	248124	191733	281706	138752	297662	435460	151268	109402	104234	92201	139815	73355	106045	131845	118727	113813	87362	97473	109593	80371	123329	68106	66338	71197	77756	70609	79382	95636	85592	108535	108376	79114	108032	72578
MA0150.3	Nfe2l2	738	1635	3564	1564	532	3146	4314	3332	2949	3423	817	1326	945	2915	2162	1017	1010	1323	7199	3485	960	932	828	583	1404	785	779	1228	1524	1156	651	1102	760	962	1643	603	648	689	863	685	623	1253	1128	757	1138	488	1301	913
MA0151.1	Arid3a	0	0	0	0	0	0	0	0	0	0	0	0	0	0	0	0	0	0	0	0	0	0	0	0	0	0	0	0	0	0	0	0	0	0	0	0	0	0	0	0	0	0	0	0	0	0	0	0
MA0152.3	Nfatc2	871	4641	5814	1607	1511	4104	4631	4546	3447	4038	1814	1578	2024	3502	2887	2637	1606	1391	12796	5034	2325	1148	1173	1003	1136	883	1089	1645	2585	1556	1087	1963	1202	1827	2219	1117	793	948	1257	969	1248	2095	1551	1119	1045	880	2434	1817
MA0153.2	HNF1B	246	335	1915	423	115	236	241	260	148	227	97	75	87	270	210	178	111	92	746	366	72	58	80	85	83	53	94	98	150	88	156	72	144	57	153	70	46	46	77	55	110	85	108	84	90	45	303	94
MA0154.5	EBF1	17817	40590	147380	97380	20635	138040	151052	125996	76379	188343	15896	45934	23745	117479	98275	38271	23448	16205	305248	145049	37357	27286	49839	30929	51095	31653	53388	72635	63026	57001	17823	48963	28197	40124	57425	20458	31870	28224	39418	23650	20895	53145	50390	30815	56460	19878	68050	33161
MA0155.1	INSM1	31088	60216	140126	85711	26158	178913	203801	208103	170465	206607	31588	40257	33972	159845	113681	59690	34840	29560	386528	234466	51220	30246	48638	31398	46022	31531	49883	50956	65329	49293	34894	44629	42163	39546	53047	30997	24645	31138	35157	30645	33485	51028	40545	35807	51147	23162	62826	34796
MA0156.4	FEV	5148	1534	6436	1265	1063	2769	4176	3645	2073	2644	1242	832	1464	3446	2780	1276	1166	1092	11767	4078	1905	606	281	514	779	175	440	678	1211	722	1114	533	795	256	774	503	364	569	368	696	815	738	553	521	500	290	803	227
MA0157.4	Foxo3	2070	1240	1640	534	309	961	1023	893	921	1044	221	207	305	721	644	588	230	314	3814	893	314	232	190	207	243	214	199	281	260	237	243	222	813	200	256	331	226	199	178	240	359	235	287	227	333	140	280	162
MA0158.2	HOXA5	381	560	1624	1620	210	786	827	851	527	1073	220	270	212	811	492	304	219	594	2273	904	248	178	263	178	220	160	296	292	225	284	516	143	418	154	182	307	143	159	146	163	361	208	198	201	227	133	286	134
MA0159.1	RARA::RXRA	11268	20867	58398	22554	9126	50834	65017	63167	44826	58278	10678	15545	12849	52584	33534	19035	13376	10931	134917	66990	16448	10188	14177	9791	15224	9508	14868	24838	22732	18340	13520	16010	18873	12387	16075	12000	7481	11507	11415	10529	13612	15928	14009	12786	15133	7597	23077	10732
MA0160.3	NR4A2	2040	9772	4414	2773	2748	5128	7294	5667	7528	5619	2552	3587	3105	6713	10408	2720	2834	2392	16277	6473	3037	1366	1516	1430	1753	1206	1505	2104	2080	1991	1176	1764	1818	1737	2098	1300	1166	1177	1522	1100	1345	2418	2067	1265	1681	1679	2381	1685
MA0161.3	NFIC	1029	4219	6043	2086	2384	5531	6941	7810	6074	5818	1859	2376	2312	6378	8743	3671	2071	2069	15783	7981	3964	1725	2045	1994	2501	1621	2037	2590	2805	2796	918	2018	1130	2215	3716	1044	1895	1261	1936	1166	1048	2831	2306	1750	2438	1301	2418	1897
MA0162.5	EGR1	93489	225284	200384	105754	75858	240212	425685	340020	210302	266487	117545	127482	167061	243531	197133	177100	175917	105623	495613	387975	163122	55636	66731	65955	141380	49088	76568	88553	94143	82597	56000	45276	84139	31512	61694	33429	46162	52545	46884	57889	56489	47702	64070	67311	102756	45367	78944	30595
MA0163.1	PLAG1	314629	397556	253751	428221	179427	290069	467833	371789	482911	335441	220531	198304	353224	351371	289169	250703	322404	149908	446076	256417	279472	257987	269033	142959	374257	153240	300237	262426	277270	262878	301046	109386	406046	123805	225305	136766	111676	146639	126376	140554	231731	168176	155732	221857	323926	130292	342018	102174
MA0164.2	Nr2e3	0	0	0	0	0	0	0	0	0	0	0	0	0	0	0	0	0	0	0	0	0	0	0	0	0	0	0	0	0	0	0	0	0	0	0	0	0	0	0	0	0	0	0	0	0	0	0	0
MA0258.2	ESR2	6238	16893	20810	12470	5118	28205	34582	31328	24214	31165	4328	6672	5780	29234	25912	9110	5089	6245	72308	34100	10053	6178	10043	7707	11707	7233	10594	15046	21563	12091	6845	12402	9820	9913	11714	7622	7145	9791	8858	7402	8917	12120	11656	7669	11940	5509	16190	8488
MA0259.2	ARNT::HIF1A	0	0	0	0	0	0	0	0	0	0	0	0	0	0	0	0	0	0	0	0	0	0	0	0	0	0	0	0	0	0	0	0	0	0	0	0	0	0	0	0	0	0	0	0	0	0	0	0
MA0442.3	SOX10	0	0	0	0	0	0	0	0	0	0	0	0	0	0	0	0	0	0	0	0	0	0	0	0	0	0	0	0	0	0	0	0	0	0	0	0	0	0	0	0	0	0	0	0	0	0	0	0
MA0461.3	Atoh1	364	1291	2258	1154	531	1118	1232	1294	1752	1255	436	392	342	1141	1961	983	428	570	4040	1336	620	242	307	280	299	242	281	364	194	232	972	182	912	222	269	565	197	373	181	291	964	218	237	379	344	231	221	196
MA0462.3	BATF::JUN	283	1190	1302	951	354	1965	1923	2248	1532	2446	225	295	818	1680	1300	552	232	467	4480	2148	412	347	288	267	368	296	293	508	541	449	273	473	317	352	527	237	200	249	318	306	272	461	465	297	437	161	468	328
MA0463.3	BCL6	638	1161	2033	476	630	1834	3139	1961	1432	2602	718	785	879	2265	1418	1718	910	630	6379	1927	1401	2796	483	513	609	448	516	1465	871	829	295	719	466	664	1166	425	413	304	662	337	309	919	676	571	784	401	1035	601
MA0464.3	BHLHE40	1525	3808	16144	1511	623	2888	4015	3987	4007	3020	1366	2056	2061	5183	2816	1224	1890	1061	13501	4269	2636	838	1857	1762	1799	973	2053	1748	1394	1548	995	1056	2103	884	1538	1510	2056	1804	970	1495	1599	1209	1312	985	1791	849	1201	761
MA0465.3	CDX2	426	954	2565	920	261	927	2166	1224	669	789	321	389	502	733	907	683	404	314	2546	1296	337	241	285	195	282	202	309	331	307	321	434	282	272	348	418	165	166	153	249	176	230	374	297	269	291	181	383	313
MA0466.4	CEBPB	123	344	577	379	203	410	368	587	256	477	489	202	154	921	293	370	181	151	1390	575	279	94	151	114	97	50	152	121	103	119	127	84	91	80	79	61	117	96	56	88	70	70	99	104	88	94	108	67
MA0467.3	Crx	0	0	0	0	0	0	0	0	0	0	0	0	0	0	0	0	0	0	0	0	0	0	0	0	0	0	0	0	0	0	0	0	0	0	0	0	0	0	0	0	0	0	0	0	0	0	0	0
MA0468.1	DUX4	440	903	1373	891	525	952	928	1152	570	1339	352	312	358	1480	705	473	372	275	3170	1147	339	302	244	167	229	170	187	327	605	309	550	547	535	373	348	275	101	208	371	198	391	411	304	323	239	125	508	367
MA0469.4	E2F3	579	689	1126	1004	367	1290	1276	978	606	888	214	454	316	1181	475	686	317	254	2125	1028	286	315	582	174	163	115	600	471	711	408	1912	424	1254	457	511	578	234	261	170	261	2427	1198	517	335	432	106	1749	350
MA0470.3	E2F4	935	1247	1695	2237	706	1891	2705	1968	817	2289	409	668	623	2308	1076	1327	541	466	4263	2181	1131	493	367	435	291	153	454	441	401	332	421	317	435	252	429	267	560	257	175	327	422	210	309	295	396	202	571	215
MA0471.3	E2F6	9924	32999	68212	29783	27357	82674	119867	107904	69394	98974	48000	53003	61935	96954	68758	51465	59155	40805	254281	116914	45032	27157	25449	28111	44547	18383	27612	36760	47954	40108	20598	27332	29789	21421	36763	16192	28349	21550	27089	23301	22136	29667	35254	30870	36182	17072	43284	21573
MA0472.2	EGR2	3537	9096	24792	9575	6274	25801	47758	37089	19837	29374	7475	9632	9705	28548	18629	12654	10930	10880	89636	40848	16862	5391	8490	9963	15395	4231	10262	9532	16314	14308	5999	6393	9854	4211	10054	4107	10250	7762	7708	8628	7343	6543	10913	6206	11845	4332	12949	4872
MA0473.4	ELF1	5578	7317	35243	10175	3769	28011	30394	31571	22591	31476	4373	4782	4864	27441	18181	7446	4960	6179	63770	32607	8824	4808	5459	3675	4586	4307	5177	8849	7170	5908	4065	5679	4602	5115	8768	3886	3232	4030	4585	4145	3924	6203	5258	4415	6107	3030	6204	4640
MA0474.4	Erg	5409	8719	29849	9955	7889	25923	28657	28749	22268	28310	7857	7611	9346	30783	18165	11019	9179	7820	70479	29769	12540	5753	6122	4909	5212	4967	6274	9175	7808	6546	4836	6345	5340	5684	9264	4590	4164	4520	5164	4503	4545	6824	5795	5283	6699	4101	6908	5150
MA0475.3	FLI1	3799	1373	5972	1149	870	2371	3088	2805	1704	2130	590	682	1262	2335	2212	1062	937	853	9006	3173	1172	447	210	361	332	165	320	574	979	465	968	442	664	257	413	422	239	411	276	519	644	600	434	386	375	235	722	229
MA0476.2	FOS	282	1370	1248	1674	395	1906	1951	2106	1361	2368	251	362	294	1641	1173	602	266	523	4926	2135	436	316	299	275	406	298	327	553	552	434	298	490	354	338	541	279	223	257	366	324	260	463	496	331	452	196	470	343
MA0477.3	FOSL1	320	1960	1583	1150	457	2284	2422	2476	1906	2727	282	346	889	1979	1491	682	290	566	5510	2569	514	427	363	320	456	362	361	623	691	539	356	574	402	410	626	321	283	318	414	398	314	555	574	374	535	214	622	405
MA0478.2	FOSL2	2836	16037	4695	2835	1023	5797	6738	6247	5172	6809	787	957	824	4765	3879	1722	832	1257	13568	6674	1564	981	998	739	1239	982	964	1640	1875	1473	906	1624	1137	1290	2001	825	567	864	1166	972	838	1809	1445	981	1436	588	1758	1313
MA0479.2	FOXH1	467	2032	2488	2454	386	1632	1850	1927	1254	1762	412	364	378	1545	1168	1625	399	410	4815	2194	554	292	244	213	279	253	254	415	973	391	304	452	350	447	578	209	136	212	310	180	309	580	442	289	275	191	876	433
MA0480.3	Foxo1	2070	1240	1640	534	309	961	1023	893	921	1044	221	207	305	721	644	588	230	314	3814	893	314	232	190	207	243	214	199	281	260	237	243	222	813	200	256	331	226	199	178	240	359	235	287	227	333	140	280	162
MA0481.4	FOXP1	2070	1240	1640	534	309	961	1023	893	921	1044	221	207	305	721	644	588	230	314	3814	893	314	232	190	207	243	214	199	281	260	237	243	222	813	200	256	331	226	199	178	240	359	235	287	227	333	140	280	162
MA0482.3	GATA4	1334	1460	3449	1434	674	2164	2126	2088	2024	2245	1101	1019	1419	1712	1179	1135	1302	559	8736	2195	619	452	518	454	560	371	519	635	564	526	716	451	439	469	481	454	305	413	363	363	406	630	436	480	532	329	775	408
MA0483.2	Gfi1B	828	4566	5653	2250	2099	6422	6259	5748	4822	7164	1147	2700	1220	5387	5744	2339	1328	1238	10705	6239	2511	1200	1312	852	1404	1148	1266	1946	3176	1676	1166	2293	1450	1725	2146	1079	629	1179	1371	1114	1343	2036	1668	1140	1358	804	2426	1728
MA0484.3	HNF4G	2989	5561	6796	2576	1993	6210	12116	10417	4384	7148	2170	2617	2748	5673	4495	2667	2499	1675	19284	11806	3281	910	1035	864	1162	891	994	2113	2588	1874	1228	1566	1571	1642	2290	1557	674	1344	1432	1184	1688	2237	1662	959	1280	725	3025	1525
MA0485.3	HOXC9	317	989	852	215	92	205	1007	268	195	223	163	182	232	320	329	194	270	83	1145	313	106	51	92	62	74	32	89	119	167	63	172	65	129	55	114	129	36	42	54	50	127	95	76	71	115	58	107	57
MA0486.2	HSF1	195	1215	995	400	407	942	1041	1386	436	1071	386	591	377	897	774	676	401	613	3283	1219	603	174	192	217	239	168	200	269	1376	809	153	655	193	608	1396	152	181	169	666	136	184	1002	700	226	268	145	1315	582
MA0488.2	JUN	8142	1654	3312	4979	762	2222	3010	2159	2121	2404	870	1004	875	2771	1722	1021	761	730	6278	2223	926	862	899	479	742	463	1045	1472	1581	1086	918	1152	1081	889	1769	1908	527	891	841	781	1037	1421	1103	801	854	339	1656	856
MA0489.3	Jun	386	2002	1848	1478	536	2705	2798	3133	2085	3211	333	452	939	2460	1843	796	337	688	6584	3061	608	497	436	390	553	430	459	772	834	651	407	697	485	516	757	371	314	382	494	470	399	692	707	443	651	232	700	502
MA0490.3	JUNB	315	1864	1622	1625	460	2212	2252	2368	1862	2641	339	396	906	1862	1440	651	327	531	5360	2426	488	407	332	305	432	351	331	594	642	508	336	537	401	388	593	297	264	315	390	366	306	533	544	343	506	221	584	388
MA0491.3	JUND	308	1881	1609	921	473	2239	2275	2382	1866	2656	336	339	903	1855	1438	645	310	525	5564	2459	482	400	333	305	428	351	330	590	640	500	335	534	378	390	593	295	265	305	389	361	303	532	536	341	500	207	588	393
MA0492.2	JUND	8801	1653	3983	5790	813	2200	3588	2276	2104	2389	931	997	786	2736	1665	1054	737	784	6638	2315	962	1080	872	462	715	411	1023	1117	1550	989	1260	1018	1397	815	2158	1957	457	837	769	691	1336	1287	1051	706	753	316	1574	783
MA0493.3	KLF1	163288	455613	491344	224961	179134	311541	490835	422907	263446	349038	264638	334061	349702	358834	255160	369687	350781	230635	234243	466217	313233	119246	131947	110017	210122	109389	144373	170690	221245	177066	116163	119139	165293	97252	169379	94479	64187	111462	110429	117123	118702	133527	141313	122862	191768	92974	193185	85934
MA0494.2	Nr1h3::Rxra	4822	7318	23708	15721	2350	16151	16881	17351	12326	19101	2698	3959	3888	14504	10736	5093	3307	3264	44273	18516	4915	3505	4929	2888	4593	2786	5457	8506	12110	7593	12771	7930	11427	5948	9092	7183	3700	5876	4751	3540	10563	8201	6062	5359	6042	2474	14939	4959
MA0495.4	MAFF	384	1740	1584	997	529	1932	1541	1747	1972	1963	306	682	401	1467	1369	978	375	473	4175	1935	622	350	406	340	451	388	412	598	932	562	416	981	424	499	860	518	236	299	464	361	450	525	449	349	454	261	662	473
MA0496.4	MAFK	1802	4766	4245	2409	1223	9032	10936	10030	6803	9771	1232	1611	2363	8304	7055	2778	1518	1373	14192	10020	1979	1766	3220	1335	1922	1816	2040	2366	6397	2522	1210	2496	1963	2190	2913	1191	940	1531	1860	1533	1282	2711	2425	1525	2237	1002	2543	2002
MA0497.2	MEF2C	660	4027	4363	1198	1926	3393	5865	3866	2206	4310	993	1006	1107	2351	1524	2002	1063	849	6554	4383	935	1047	870	783	833	570	879	1178	3190	1629	1280	1544	1712	1220	1489	582	461	471	711	413	792	2587	1357	979	833	512	5253	1105
MA0498.3	MEIS1	0	0	0	0	0	0	0	0	0	0	0	0	0	0	0	0	0	0	0	0	0	0	0	0	0	0	0	0	0	0	0	0	0	0	0	0	0	0	0	0	0	0	0	0	0	0	0	0
MA0499.3	MYOD1	4567	14409	16547	17394	4598	23028	26485	29862	34731	27418	8342	7621	6658	30480	24877	9286	6552	5647	90370	32128	11447	7611	7471	6174	7995	6010	7606	8180	14145	11046	4463	10864	6670	8714	9408	4716	4863	6387	7655	5810	5555	11273	9092	4435	8893	4079	11666	7809
MA0500.3	MYOG	3836	20240	15856	16470	7706	31598	36648	38474	37684	37704	10456	6326	4982	51904	31438	10328	4788	6702	85370	41474	13964	7174	12542	9396	13980	10680	12496	13554	19656	14586	8458	17596	12816	14662	13924	13086	7210	11398	12940	10702	10528	16328	13640	7062	14950	6610	17350	13026
MA0501.2	MAF::NFE2	570	1478	2297	1188	485	2403	3565	2773	2012	2620	602	994	655	2343	1601	849	643	1159	5678	2759	696	697	624	444	2623	614	601	954	1195	903	473	950	621	698	1336	514	535	618	661	593	542	898	891	581	915	383	1038	710
MA0502.3	NFYB	9739	11193	14666	10559	4328	17722	21975	25698	14640	19438	4476	6032	4803	18608	24006	6718	4977	4313	51914	28778	8257	3767	2882	2618	3255	2481	2927	4785	5412	5067	3232	2971	3354	2842	5324	2435	2653	2602	2979	2483	2861	3918	3532	4494	3814	2029	4718	2684
MA0504.2	NR2C2	68390	184512	235923	103935	74706	224461	337612	314726	200754	255128	77138	87236	115389	271769	194423	111427	111055	63954	343052	369631	98279	50306	63797	49900	88259	40104	65179	76715	65247	62767	49245	54906	76066	35943	58874	35606	26505	41167	35305	39238	45064	47177	44427	53933	68495	44762	67126	30764
MA0505.3	Nr5a2	1654	4403	7254	1899	4221	6158	6965	6528	5938	8358	2294	3115	2850	6116	16130	3105	2731	2044	21572	6898	2897	1474	1809	1374	1970	1527	1825	14721	3173	2979	1387	2726	1532	2547	4520	1416	1374	1647	2236	1348	1733	3233	2668	1777	2336	1142	3710	2924
MA0506.3	Nrf1	2325	4870	14664	8483	3486	20778	31305	28576	24344	24686	8315	11257	12913	33600	18478	10634	10846	12298	55837	31772	19413	9566	12460	16935	19256	6484	14339	10230	21504	16506	5087	9277	10982	5925	11342	3690	18237	8844	9774	9641	7936	8456	13333	12083	16451	5794	16298	7149
MA0507.3	POU2F2	208	575	890	588	295	500	540	558	559	443	234	223	331	461	437	662	245	232	2936	591	311	136	145	118	160	126	132	137	184	123	378	110	431	135	118	105	90	104	131	101	137	160	129	109	133	79	312	132
MA0508.4	PRDM1	1655	10790	13360	3334	4793	10784	10295	9903	8307	14432	8583	7516	10305	13357	7211	7449	10780	5034	28615	10486	5793	3038	2795	3014	3304	2960	2891	4015	2516	3389	2155	2747	2745	2311	4774	2536	1933	2039	2157	2139	2152	2949	2449	2820	4471	2490	2703	2217
MA0509.3	RFX1	623	1359	1815	1143	720	1657	2077	2107	2702	1892	411	597	492	1972	2429	1461	495	666	9391	2235	1100	806	892	688	941	457	934	1429	1353	967	962	731	1346	1047	842	1018	867	996	663	690	1495	2147	798	954	969	381	1385	724
MA0510.3	RFX5	689	2193	2094	1451	834	2484	3215	4083	3439	2771	474	592	596	2645	3513	1925	667	875	11696	3685	1302	954	1057	818	1160	624	1062	1588	1783	1296	937	1008	1151	1344	1258	996	957	1036	912	777	1302	2400	1057	1054	1137	508	1569	1005
MA0511.2	RUNX2	510	1674	4419	1075	430	2137	2737	1836	1504	1938	756	863	567	1726	1631	899	590	422	6451	2053	865	612	614	498	876	498	607	836	1099	739	647	943	686	488	575	480	358	524	447	479	579	651	625	668	769	381	840	615
MA0512.2	Rxra	5330	12019	18589	8642	3622	21838	24110	24135	20950	25804	5504	10731	6642	19837	19205	7516	6385	4444	52723	25959	6109	3400	4238	3076	4279	3195	4294	16512	7641	5902	4435	5464	5384	4891	6505	4212	2377	3819	3983	3160	4305	5893	5162	4194	5852	3091	9415	4085
MA0514.3	Sox3	1227	3840	5332	4221	1180	3640	4270	3951	2961	3874	1167	1279	1082	3878	7904	2114	1094	1375	25461	4239	1495	1568	935	397	805	599	1033	1407	2573	1500	3038	1521	3311	1599	2153	2457	803	2944	939	981	3138	1661	1175	1511	938	423	2455	1567
MA0515.1	Sox6	1715	6171	7022	3208	1897	6725	8944	7681	5133	6678	2234	2017	2242	7842	5332	3578	2335	2548	28219	8167	2867	2325	2106	1182	1922	1398	2245	2897	4561	3453	2985	2972	3267	3020	3680	2673	1338	3607	2183	1779	3208	3118	2793	2445	2492	1158	4425	3023
MA0516.3	SP2	86277	310725	409448	164986	172663	482747	211046	347840	402315	268370	233789	283849	318618	315027	378450	291230	308792	213621	275364	380953	238223	135361	121497	106665	182402	89893	134204	161797	212827	155459	96693	101787	137687	83876	150342	80248	77182	97315	95358	102322	103860	115997	123580	112519	166343	81522	162586	77052
MA0517.2	STAT1::STAT2	1534	9150	9933	3703	3542	7952	7783	6950	7093	7833	4553	3478	5485	9672	5320	5064	5293	3806	20167	7671	4254	2865	3797	2509	3335	3856	4237	3420	4872	4181	3253	15922	4365	4139	4873	2159	2420	2492	3211	1998	2798	5060	2937	3167	2732	2346	6097	3606
MA0518.2	Stat4	1202	2814	3234	3075	1572	4419	6130	4853	4168	5155	1631	1696	2522	7896	3772	2776	2223	1442	11132	4848	2686	1904	1305	1174	1556	1088	1308	2185	2955	2384	864	2482	1067	1854	3605	1069	1014	937	1775	1002	897	2573	1974	1095	1469	935	2678	1931
MA0519.2	Stat5a::Stat5b	1171	2766	4589	75772	1887	6467	6728	6114	3887	7406	1855	1936	2406	6887	3653	3298	2261	1812	15125	6596	4821	1575	1342	1135	1514	1085	1272	2088	4389	3121	849	3653	1818	2485	5727	1036	1036	1083	2195	1056	1090	3552	2506	1174	1590	977	4396	2463
MA0520.2	Stat6	424	1405	4051	1405	716	3081	2581	3452	1810	3881	755	798	804	2386	1445	3009	822	791	6167	4239	1684	407	468	465	650	441	439	770	1151	833	283	916	1286	895	2388	340	378	380	721	402	452	1171	843	417	522	362	1282	901
MA0521.3	Tcf12	0	0	0	0	0	0	0	0	0	0	0	0	0	0	0	0	0	0	0	0	0	0	0	0	0	0	0	0	0	0	0	0	0	0	0	0	0	0	0	0	0	0	0	0	0	0	0	0
MA0522.4	TCF3	3866	7581	23791	9777	2623	20376	23637	25240	28037	23629	5826	18926	6815	26065	18586	11884	7017	4938	68802	26882	10862	3999	7218	5891	7771	5117	7343	7606	8173	7933	3935	7353	5546	5970	7903	4081	5081	5923	5833	5417	4536	7377	7120	4223	7348	3548	7629	5334
MA0523.2	TCF7L2	1012	1667	2418	735	718	1491	1956	1859	1446	1702	682	697	896	2337	1322	1204	893	909	7404	2027	1572	505	380	421	511	360	390	712	504	511	398	446	371	448	739	421	282	319	393	310	363	528	440	1390	522	364	1304	430
MA0524.3	TFAP2C	17886	59741	180758	94958	19082	129259	176212	160330	90203	162328	19020	47184	27121	150031	117155	31470	26390	24258	298640	184638	57846	32918	60304	50192	70202	30633	69109	62327	78945	66175	22139	43045	36461	32990	55530	18841	46101	33734	41395	34230	26759	46249	55342	41057	64323	22854	68336	30507
MA0525.2	TP63	368	508	906	668	159	909	1080	986	1135	957	300	283	271	1229	716	382	270	257	3560	1102	550	399	362	339	498	285	351	657	590	497	214	450	351	297	481	555	618	485	302	286	597	398	383	551	622	303	674	251
MA0526.5	USF2	2470	3573	18656	1097	759	3199	4960	3908	4341	2939	1792	2360	2906	5617	3392	1718	2490	1068	13772	4355	2036	836	1396	1459	1589	810	1583	1860	1825	1465	1098	1028	2272	789	1712	1760	1560	1744	1070	1466	1828	1253	1310	938	2155	695	1147	919
MA0527.2	ZBTB33	585	440	3898	605	1135	3907	4992	4889	2244	10327	1013	1116	1688	3221	2583	2685	2128	1167	6263	5654	3161	2104	2143	4446	3251	1402	2809	1842	4272	3064	1045	1787	2011	931	2614	812	4909	1843	1868	1907	1614	1903	2569	2147	3131	1340	3150	872
MA0528.3	ZNF263	30266	76781	115362	65389	37022	137359	170479	172043	134749	158321	58708	63270	67113	201258	111901	64907	70402	37949	456939	182847	53077	46068	45790	40192	52455	37904	47117	59394	59647	52800	30280	46036	38966	39900	55583	29309	32380	32525	37845	32102	30989	47697	42531	45967	52188	30722	50995	36500
MA0591.2	Bach1::Mafk	1057	2570	4434	2343	904	5300	7559	6061	5093	5704	1227	1733	1330	5793	3420	1846	1257	1639	17261	6510	1621	1523	1839	1101	3696	1308	1449	1879	2271	1925	988	1833	1463	1608	1746	1031	984	1293	1518	1268	1109	2119	1755	1212	1885	795	1914	1506
MA0592.4	ESRRA	1482	3333	3242	1509	1407	3426	4142	3977	6188	3561	1554	2898	1712	3787	4278	2196	1854	1529	15257	4108	2026	1170	1395	1039	1464	1773	1347	13365	2280	1810	1034	1966	1332	1546	3117	1117	981	1329	1481	1039	1352	2161	1725	1385	1698	835	2425	1552
MA0593.2	FOXP2	2312	3692	2707	1391	490	1455	2387	1453	1409	1593	393	353	517	1042	1065	1036	448	499	5171	1457	538	481	322	319	429	346	341	480	500	421	371	390	548	393	466	359	306	267	349	280	377	448	576	347	500	260	500	331
MA0594.3	HOXA9	135	177	1157	60	40	102	115	142	54	98	80	112	569	164	63	66	130	35	773	142	52	17	36	37	39	54	39	42	19	23	94	22	63	22	49	79	28	26	18	28	33	40	24	19	35	23	24	20
MA0595.1	SREBF1	3459	11235	9161	3949	2223	13933	16101	14330	11069	15914	3410	4546	3576	12051	9102	4495	3663	3067	30995	15466	4112	3324	3692	2487	4325	3207	3637	6611	5827	4974	5546	4937	6322	4110	6668	4987	1851	4050	3937	3717	4682	4989	4500	3971	4686	2003	5643	3742
MA0596.1	SREBF2	2583	10810	9647	4107	2260	13742	14643	15344	12122	15923	3658	4819	3701	11413	9772	4801	3773	2813	31918	17414	4348	3652	3769	2416	4287	3337	3671	6771	5829	4939	6089	5277	6454	4162	6421	5067	1845	3986	3914	3729	4784	5107	4500	4278	4706	2130	6143	3799
MA0597.3	THAP1	7172	38936	62901	47434	9801	73832	79688	82408	77773	86203	13716	19626	15206	84485	110797	27900	15457	17239	186719	90321	31621	16254	21925	19596	25510	20371	22614	33555	35165	26333	11628	28923	17896	24008	28713	13477	17237	15851	20633	16129	14080	29439	25177	17989	28267	13000	29810	22720
MA0598.4	EHF	5008	6052	20910	7560	3523	20477	23036	22902	14777	21862	4368	4526	4911	21501	12531	6806	4829	5098	49889	23371	7521	3756	3697	2897	3015	2541	3431	5591	5200	4134	3126	4009	3456	3547	5650	2842	2533	2898	3187	2840	2854	4352	3634	3198	3637	2279	4526	3262
MA0599.1	KLF5	132849	431573	475779	215667	185603	323946	362894	454851	278023	394560	304870	366034	392898	371746	254169	335065	396366	240368	249438	185756	294287	149622	141746	119306	205465	113270	151945	192221	221737	179005	120974	126799	169648	109318	183833	100091	72072	112113	114685	115103	119976	143917	143414	129246	191089	100801	192696	96954
MA0600.3	RFX2	526	1152	1603	1060	732	1503	1917	2146	2527	1675	376	603	472	1833	1765	1362	462	635	8483	2278	948	731	767	585	798	404	773	1224	1187	879	887	696	1125	1051	821	965	743	889	619	630	1404	2051	722	858	842	367	1301	728
MA0601.2	Arid3b	0	0	0	0	0	0	0	0	0	0	0	0	0	0	0	0	0	0	0	0	0	0	0	0	0	0	0	0	0	0	0	0	0	0	0	0	0	0	0	0	0	0	0	0	0	0	0	0
MA0602.2	Arid5a	165	715	1562	985	177	288	386	406	263	370	214	167	210	564	271	537	216	167	1224	389	193	70	121	71	92	48	145	147	86	72	260	86	117	51	90	111	53	55	64	75	174	68	54	99	69	52	83	55
MA0603.2	Arntl	1787	3768	12425	1738	588	2890	4238	3873	3662	2961	930	1358	1384	4962	2816	1231	1234	1104	12923	4094	2321	885	1860	1727	1879	971	2049	2173	1670	1716	1054	1258	2199	1011	1745	1852	2266	2072	1100	1540	1931	1394	1477	1035	1976	876	1499	835
MA0604.1	Atf1	2245	675	1538	791	295	850	2263	1138	723	866	243	789	322	2478	720	791	287	362	2280	997	430	333	537	432	652	302	676	726	513	566	369	394	631	230	658	1002	661	614	353	477	502	333	462	432	678	262	631	199
MA0605.3	ATF3	9315	877	2414	7226	645	1022	2400	1254	1074	1137	659	488	434	2433	649	715	412	450	3416	1357	336	403	442	259	480	210	589	573	985	622	411	592	558	372	1791	1212	397	486	495	416	523	697	669	402	474	171	1129	377
MA0606.3	Nfat5	1697	18572	7235	2399	4087	5486	6268	6089	4739	5493	3493	3169	4226	7021	4524	4358	3926	2336	16443	6727	3509	1992	2241	1873	2234	1553	2154	3042	3852	3087	1626	3411	2053	3211	5933	1575	1474	1548	2267	1438	1825	3743	2977	2043	1987	1597	4252	2895
MA0607.2	BHLHA15	1424	9302	3582	2414	940	2430	2562	2572	3362	2488	894	960	748	2456	4014	1888	868	1042	9350	2762	1264	560	678	554	666	458	662	832	488	550	2938	410	2080	478	586	1490	452	840	424	692	2650	504	496	854	716	450	472	422
MA0608.1	Creb3l2	2463	2135	4425	738	538	2301	4654	2865	2101	2152	784	1330	1251	4057	2722	1070	1024	830	9257	2987	1494	751	1454	1232	1522	826	1530	2134	1474	1520	959	1035	1906	749	1478	1887	1649	1714	952	1312	1835	1083	1177	882	2115	701	1238	727
MA0609.3	CREM	14246	1190	3450	6860	736	2072	4228	2360	1788	2212	802	732	698	3434	1412	1816	662	1276	5720	2444	950	752	1046	666	1060	546	1290	1282	1632	1152	772	992	1254	730	2400	2016	836	1018	888	870	1140	1276	1222	776	1038	458	1798	686
MA0610.2	DMRT3	254	557	1703	4417	182	626	654	764	573	601	181	170	169	630	470	267	183	200	1734	772	224	133	143	115	162	190	122	226	170	135	160	139	101	144	426	133	63	107	110	105	119	222	143	153	223	106	147	119
MA0611.3	Dux	114	424	640	338	531	855	653	749	395	1576	177	171	186	394	384	304	155	183	2377	709	180	95	77	74	87	81	85	154	222	99	98	186	75	156	112	58	69	50	137	61	89	147	131	163	114	53	141	99
MA0612.3	EMX1	0	0	0	0	0	0	0	0	0	0	0	0	0	0	0	0	0	0	0	0	0	0	0	0	0	0	0	0	0	0	0	0	0	0	0	0	0	0	0	0	0	0	0	0	0	0	0	0
MA0613.1	FOXG1	1920	1139	1338	614	259	782	780	728	584	857	168	161	263	582	520	501	193	232	2931	748	252	181	174	175	215	197	186	245	231	236	181	206	361	206	273	94	128	132	180	101	123	256	303	195	294	148	226	178
MA0614.1	Foxj2	2029	1098	1217	599	234	553	752	699	543	709	195	191	243	599	468	563	254	238	2825	745	238	150	135	134	164	168	147	212	194	191	174	139	364	164	243	86	94	142	135	79	136	193	258	156	253	120	181	151
MA0615.2	Gmeb1	0	0	0	0	0	0	0	0	0	0	0	0	0	0	0	0	0	0	0	0	0	0	0	0	0	0	0	0	0	0	0	0	0	0	0	0	0	0	0	0	0	0	0	0	0	0	0	0
MA0616.3	HES2	1604	4940	9297	2153	1222	5021	7619	6403	5730	4850	2038	2927	3256	9206	4522	3070	2840	1994	19325	6749	5513	1598	3486	4616	3857	1628	4000	3246	3660	3573	1632	1950	3386	1356	2738	2399	6189	3572	2012	2979	3052	1848	2548	1920	4172	1746	3024	1345
MA0618.2	LBX1	291	396	1155	1008	169	482	655	527	881	446	379	433	507	460	394	293	469	184	1404	548	184	108	315	116	164	89	389	297	313	236	803	233	562	227	196	348	114	142	189	154	420	362	252	158	192	92	496	154
MA0619.2	LIN54	386	2797	1578	292	699	1102	1197	1155	596	1109	425	436	573	1668	803	615	604	401	3324	1276	393	215	177	152	161	129	119	171	297	182	178	210	131	213	219	98	100	95	167	117	125	301	246	167	154	107	314	210
MA0620.4	MITF	1372	4036	10866	1276	748	4132	7910	6000	6238	4160	2374	3300	3648	5382	3306	1496	3274	816	10354	6544	1354	510	672	820	908	410	794	874	994	1174	718	588	1592	414	1002	1250	750	1046	556	782	1288	740	738	576	988	422	684	442
MA0621.2	mix-a	0	0	0	0	0	0	0	0	0	0	0	0	0	0	0	0	0	0	0	0	0	0	0	0	0	0	0	0	0	0	0	0	0	0	0	0	0	0	0	0	0	0	0	0	0	0	0	0
MA0622.2	Mlxip	0	0	0	0	0	0	0	0	0	0	0	0	0	0	0	0	0	0	0	0	0	0	0	0	0	0	0	0	0	0	0	0	0	0	0	0	0	0	0	0	0	0	0	0	0	0	0	0
MA0623.2	NEUROG1	879	2171	3677	2696	794	2370	2585	2633	3836	2520	828	735	613	2426	3455	1856	708	1180	9536	2800	1183	507	656	564	698	502	617	882	518	530	2046	447	1848	472	543	1103	442	868	416	570	1907	555	569	863	817	430	499	392
MA0624.3	Nfatc1	0	0	0	0	0	0	0	0	0	0	0	0	0	0	0	0	0	0	0	0	0	0	0	0	0	0	0	0	0	0	0	0	0	0	0	0	0	0	0	0	0	0	0	0	0	0	0	0
MA0625.3	NFATC3	0	0	0	0	0	0	0	0	0	0	0	0	0	0	0	0	0	0	0	0	0	0	0	0	0	0	0	0	0	0	0	0	0	0	0	0	0	0	0	0	0	0	0	0	0	0	0	0
MA0626.2	Npas2	1745	5468	14875	2157	956	5169	7849	7063	6660	5632	2162	2738	2866	8488	6056	1965	2615	1565	24519	7315	4606	1477	3584	3239	3353	2006	3802	3980	2601	3052	1815	2182	3449	2002	3324	2726	4254	3591	2020	2937	2991	2480	2611	1841	4646	1613	2583	1858
MA0627.3	POU2F3	299	1286	1264	666	471	1089	1268	1230	1088	973	527	511	517	1169	848	1119	515	574	5304	1306	826	371	318	330	543	313	308	388	339	339	406	305	349	339	321	252	239	355	286	271	286	517	330	347	457	259	493	332
MA0628.2	POU6F1	0	0	0	0	0	0	0	0	0	0	0	0	0	0	0	0	0	0	0	0	0	0	0	0	0	0	0	0	0	0	0	0	0	0	0	0	0	0	0	0	0	0	0	0	0	0	0	0
MA0629.2	Rhox11	1392	848	10561	973	206	942	1638	1259	613	1978	199	241	236	786	647	501	268	215	2365	1358	355	298	372	267	364	293	367	367	323	342	366	270	324	265	369	239	194	247	225	247	373	320	310	270	357	179	363	247
MA0630.2	SHOX	0	0	0	0	0	0	0	0	0	0	0	0	0	0	0	0	0	0	0	0	0	0	0	0	0	0	0	0	0	0	0	0	0	0	0	0	0	0	0	0	0	0	0	0	0	0	0	0
MA0631.2	Six3	1546	1897	6191	3510	1128	3656	3939	3773	3283	4776	1959	1113	4049	3861	2728	1303	2756	922	10818	4057	1392	943	823	655	1016	709	779	1502	1975	1558	2095	1861	1218	1129	1461	981	671	721	1051	654	1070	1435	1183	1150	1098	563	1938	1129
MA0632.3	TCFL5	1754	3499	7370	1413	1670	3904	6676	5174	3776	3851	2310	2851	3532	6663	3506	4783	2920	2806	12732	5912	6246	1611	2285	5874	3777	832	3075	1942	4530	3870	1055	1164	2875	540	2380	798	8982	2451	1948	2643	2380	1368	2804	2056	3144	1596	3726	994
MA0633.3	Twist2	0	0	0	0	0	0	0	0	0	0	0	0	0	0	0	0	0	0	0	0	0	0	0	0	0	0	0	0	0	0	0	0	0	0	0	0	0	0	0	0	0	0	0	0	0	0	0	0
MA0634.2	ALX3	0	0	0	0	0	0	0	0	0	0	0	0	0	0	0	0	0	0	0	0	0	0	0	0	0	0	0	0	0	0	0	0	0	0	0	0	0	0	0	0	0	0	0	0	0	0	0	0
MA0635.2	BARHL2	0	0	0	0	0	0	0	0	0	0	0	0	0	0	0	0	0	0	0	0	0	0	0	0	0	0	0	0	0	0	0	0	0	0	0	0	0	0	0	0	0	0	0	0	0	0	0	0
MA0636.1	BHLHE41	1550	2325	10465	1691	571	2664	3912	3646	3581	2630	960	1654	1604	4934	2541	1581	1471	845	14434	4138	2075	778	1550	1632	1707	778	1827	1537	1642	1595	883	1108	1719	708	1813	1357	1794	1461	1072	1160	1321	1142	1266	920	1592	758	1434	652
MA0638.2	CREB3	1421	1781	3243	997	438	1617	5414	2016	1576	1742	513	654	602	2684	1516	732	552	814	5261	1960	981	589	1601	820	1253	823	1678	1547	918	915	559	672	1047	549	1215	1238	1022	967	614	821	879	660	816	715	1498	585	1378	438
MA0639.2	DBP	209	381	573	548	104	265	328	296	185	252	92	92	74	307	173	153	88	87	767	289	155	62	96	56	80	46	92	74	84	105	116	64	65	57	100	61	59	52	80	71	55	76	99	71	65	43	85	69
MA0640.3	ELF3	5016	9533	38810	10558	6159	30486	33284	34468	25161	34032	9405	8937	10392	31772	19453	11411	10889	7817	67286	35681	10883	6187	6605	4961	5924	5124	6383	10756	8284	6958	4903	6599	5557	6047	9771	4645	4146	4715	5453	4845	4649	7333	6124	5624	7417	4116	7492	5542
MA0641.1	ELF4	3467	2028	7467	2222	1664	4667	10381	5771	3785	4559	1599	1250	1582	6111	3957	2191	1820	1781	21578	6394	2592	2139	637	880	1184	463	780	1149	2083	1327	1299	1189	1135	672	1444	814	682	825	806	975	1118	1221	1072	1100	1029	546	1551	576
MA0642.3	EN2	806	2108	2832	2079	626	1836	3562	2251	1269	2471	938	1384	1103	3305	1401	1235	1107	657	5806	7158	713	326	427	275	413	239	458	469	631	449	1337	454	774	416	1071	455	223	274	305	260	597	636	430	368	349	266	929	433
MA0643.2	Esrrg	2602	2411	2928	1684	1463	3613	3769	4264	6739	3765	1582	3077	1708	3706	3727	1966	1719	1914	14185	4333	2145	1219	1327	1098	1529	1671	1278	5432	1958	1694	992	1582	1349	1452	2647	1004	942	1143	1324	977	1234	1962	1613	1202	1642	865	1831	1369
MA0644.3	ESX1	291	396	1155	1008	169	482	655	527	881	446	379	433	507	460	394	293	469	184	1404	548	184	108	315	116	164	89	389	297	313	236	803	233	562	227	196	348	114	142	189	154	420	362	252	158	192	92	496	154
MA0645.2	ETV6	9122	6153	12700	6987	4286	18878	22607	24927	15775	20384	4245	3884	4185	19122	13423	6542	4527	4642	40596	23526	6575	3766	2668	3220	3715	2566	2725	3490	4189	3548	3027	2536	3638	2181	3945	2652	2158	2882	2497	2888	2957	3110	2890	3192	4534	2325	3304	1984
MA0646.2	GCM1	1961	5159	13239	10776	1606	15144	20014	17730	17023	19465	3060	2341	1942	13003	9489	3801	1979	2660	46175	19226	5356	4889	5448	3852	6589	3561	5802	6347	5889	6011	4464	4530	5977	3245	4637	3333	4144	4521	3808	4677	4227	3936	4566	5898	6301	2277	6003	3162
MA0647.2	GRHL1	465	1398	1581	775	454	1289	1346	1305	782	1265	896	1070	981	1899	804	724	1288	395	4818	1409	572	313	267	264	500	392	225	510	434	546	166	362	197	327	925	162	179	155	284	145	155	602	363	309	804	193	688	326
MA0648.2	GSC	0	0	0	0	0	0	0	0	0	0	0	0	0	0	0	0	0	0	0	0	0	0	0	0	0	0	0	0	0	0	0	0	0	0	0	0	0	0	0	0	0	0	0	0	0	0	0	0
MA0649.2	HEY2	1494	4436	8871	4474	1088	5775	8259	8656	6868	5930	1756	2204	2500	10628	5107	2334	2230	1568	21983	9531	4773	1746	3804	3910	3901	2040	4257	3950	3239	3409	1720	2587	3096	1941	3383	2491	4674	3355	2211	2769	2823	2470	2861	2049	4364	1797	3118	1779
MA0650.4	Hoxa13	1149	2551	9939	4871	1036	2285	2797	2721	2102	2348	971	1180	1016	2452	2467	3117	1046	918	10365	3045	961	980	1195	766	839	666	1250	1125	3111	1532	5766	1537	4111	1479	1205	2310	472	801	951	676	4847	2636	1374	1070	826	485	3516	1760
MA0651.3	HOXC11	290	957	1024	203	114	202	326	330	242	201	168	207	270	300	355	183	241	105	1130	367	122	66	119	78	97	49	116	115	113	71	172	83	102	59	520	122	58	44	45	50	131	93	77	68	122	63	108	54
MA0652.2	IRF8	255	1460	1465	420	318	1419	1613	1272	834	1615	415	409	497	690	576	642	482	364	2714	1376	422	430	206	238	340	247	262	371	392	303	215	299	272	255	287	205	122	176	199	200	208	413	271	444	321	180	399	336
MA0653.1	IRF9	336	2143	2039	411	386	1529	1946	1455	961	1563	557	528	598	843	722	687	641	428	3082	1556	501	791	326	376	1067	522	335	699	761	561	325	708	355	551	655	221	162	238	413	240	282	773	632	1029	598	246	834	651
MA0654.2	ISX	0	0	0	0	0	0	0	0	0	0	0	0	0	0	0	0	0	0	0	0	0	0	0	0	0	0	0	0	0	0	0	0	0	0	0	0	0	0	0	0	0	0	0	0	0	0	0	0
MA0655.1	JDP2	349	1360	1081	600	329	1897	1747	2038	1434	2701	247	245	230	1125	1064	464	206	423	3909	2070	339	246	224	205	286	215	230	378	365	276	251	315	231	212	296	218	167	176	239	217	184	308	299	254	285	145	335	211
MA0656.2	JDP2	10489	787	1859	5984	509	789	2069	923	924	859	610	499	466	1684	548	610	429	350	2656	903	318	320	398	227	422	147	574	531	1008	510	405	468	561	277	1589	1209	325	425	424	358	520	600	560	376	430	134	1018	303
MA0657.2	KLF13	5273	8870	19628	10849	4863	17001	22982	21085	15012	19952	8107	12675	10644	20969	22917	9668	10156	4137	63456	23084	8995	3475	4634	3045	5104	2757	5258	5805	5536	5270	3781	4131	4660	3291	5342	3274	2814	3492	3298	3641	3730	5438	4825	4351	5472	2457	6452	2740
MA0658.2	LHX6	255	387	1544	929	166	500	670	573	1137	452	543	613	719	481	406	301	673	186	1350	547	192	143	390	124	196	112	517	374	429	272	1130	296	762	304	230	433	137	175	259	182	524	510	356	191	242	95	708	194
MA0659.4	Mafg	976	15251	5249	2194	1057	9904	11374	10951	8084	10920	1525	1998	2744	14177	9154	2637	1969	1386	14710	12074	2496	2111	3913	1823	2697	2340	2712	3021	10352	3119	1465	3349	2423	2872	3221	1576	1282	1924	2555	1924	1728	3598	3083	1929	2873	1270	3377	2633
MA0660.1	MEF2B	193	620	2636	2146	256	1475	956	1415	986	2555	159	195	188	447	407	382	178	181	1562	1716	236	169	143	111	150	92	188	204	219	156	238	120	135	194	168	68	101	106	126	108	143	288	152	130	132	92	341	125
MA0661.2	MEOX1	291	396	1155	1008	169	482	655	527	881	446	379	433	507	460	394	293	469	184	1404	548	184	108	315	116	164	89	389	297	313	236	803	233	562	227	196	348	114	142	189	154	420	362	252	158	192	92	496	154
MA0662.2	MIXL1	0	0	0	0	0	0	0	0	0	0	0	0	0	0	0	0	0	0	0	0	0	0	0	0	0	0	0	0	0	0	0	0	0	0	0	0	0	0	0	0	0	0	0	0	0	0	0	0
MA0663.1	MLX	753	1973	5745	1127	375	1801	2542	2113	2435	1633	554	598	882	3230	1512	727	737	468	9677	2419	1249	444	875	907	1006	476	1071	921	812	901	610	496	1267	406	821	903	927	980	497	776	1035	636	677	502	1493	393	610	552
MA0664.2	MLXIPL	1272	3707	8155	1484	479	2694	3906	3637	3495	3054	863	1055	1265	4395	2762	1130	1145	925	12302	3825	2151	793	1757	1559	1726	913	1905	2069	1488	1600	1008	1164	1995	982	1673	1754	2042	1963	1031	1447	1836	1324	1387	970	1814	781	1376	790
MA0665.1	MSC	2175	4157	5703	3667	3834	7275	7749	8996	8913	8496	2616	2377	1608	9504	8146	3294	1585	1855	25954	9350	3485	1395	2397	1777	2505	2109	2323	2711	3216	2625	1496	3122	2343	2665	3424	1781	1173	1821	2393	1826	1624	3246	2691	1294	2611	1359	2956	2352
MA0666.3	MSX1	0	0	0	0	0	0	0	0	0	0	0	0	0	0	0	0	0	0	0	0	0	0	0	0	0	0	0	0	0	0	0	0	0	0	0	0	0	0	0	0	0	0	0	0	0	0	0	0
MA0667.1	MYF6	746	2539	1276	1536	2035	2856	2945	3404	3718	3878	1174	710	699	4163	2678	1435	682	864	9707	3336	1219	468	747	669	863	797	747	1015	1092	956	723	1085	1303	963	1098	3461	406	797	893	848	936	1797	1023	495	967	503	983	805
MA0668.3	Neurod2	4258	8556	6197	7805	4393	11436	12452	12979	13252	13072	3394	3910	3968	15268	10428	25247	3420	2995	34990	13798	5269	2666	3232	2631	3901	3102	3206	5461	6078	4207	2805	5240	3908	4402	4420	4746	1849	3032	3645	3061	3369	5057	4093	2664	4176	2175	5809	3973
MA0669.1	NEUROG2	2326	3216	2929	1253	1070	2080	3430	2252	4851	2286	693	734	688	2483	2288	1589	669	1018	11594	2480	1072	522	527	553	729	579	534	1119	629	640	503	556	583	584	606	431	415	557	473	482	533	648	623	544	800	398	609	485
MA0670.2	NFIA	0	0	0	0	0	0	0	0	0	0	0	0	0	0	0	0	0	0	0	0	0	0	0	0	0	0	0	0	0	0	0	0	0	0	0	0	0	0	0	0	0	0	0	0	0	0	0	0
MA0671.2	NFIX	0	0	0	0	0	0	0	0	0	0	0	0	0	0	0	0	0	0	0	0	0	0	0	0	0	0	0	0	0	0	0	0	0	0	0	0	0	0	0	0	0	0	0	0	0	0	0	0
MA0672.2	NKX2-3	1380	4629	4226	2198	1123	4780	5125	5057	4804	4980	1217	1347	1561	4740	3547	2363	1413	1307	13707	5563	2264	900	808	669	968	790	825	1282	1002	950	914	761	1160	788	1107	807	565	737	753	737	949	1083	848	936	1075	643	977	689
MA0673.2	NKX2-8	1137	2961	4160	1175	896	3992	4382	4207	3704	4090	995	945	1387	4133	2828	1752	965	1057	9797	4621	1661	775	614	510	833	636	619	1005	894	781	623	677	708	642	977	590	437	562	624	586	659	793	660	755	852	493	816	553
MA0674.2	NKX6-1	0	0	0	0	0	0	0	0	0	0	0	0	0	0	0	0	0	0	0	0	0	0	0	0	0	0	0	0	0	0	0	0	0	0	0	0	0	0	0	0	0	0	0	0	0	0	0	0
MA0675.2	NKX6-2	0	0	0	0	0	0	0	0	0	0	0	0	0	0	0	0	0	0	0	0	0	0	0	0	0	0	0	0	0	0	0	0	0	0	0	0	0	0	0	0	0	0	0	0	0	0	0	0
MA0676.1	Nr2e1	321	1828	1139	1047	402	878	886	1024	1359	985	521	503	1025	811	1432	1017	803	565	3085	1196	496	205	211	208	240	200	188	320	256	233	210	206	227	210	1005	158	139	167	188	129	237	281	302	227	248	192	330	185
MA0677.2	Nr2f6	5651	11340	17347	7383	3401	22962	23195	23480	24416	27203	5244	14126	5496	21100	20876	7327	5706	4675	53115	25067	6723	3296	4325	3398	4466	3718	4387	16685	7349	6048	3905	5994	4998	4840	9419	4153	2681	4083	4268	3282	3989	6148	5383	3726	6198	3354	8019	4246
MA0678.1	OLIG2	449	1609	3028	1936	558	1271	1396	1453	1927	1415	473	452	373	1280	2817	1144	454	727	4874	1507	670	269	359	309	348	267	319	406	215	264	1130	191	945	248	319	576	210	404	208	309	1060	263	283	420	390	256	278	224
MA0679.3	ONECUT1	650	592	1832	420	665	566	655	701	454	609	213	260	225	496	1993	414	213	187	3796	657	234	132	96	88	106	78	91	162	314	108	559	149	188	157	193	192	67	122	119	74	238	206	133	156	105	80	337	207
MA0680.3	Pax7	134	445	5595	426	181	369	831	507	177	313	147	171	143	358	342	233	138	118	2632	444	113	42	88	66	65	48	157	121	123	81	237	172	230	95	114	117	42	57	69	45	119	120	95	67	79	34	354	71
MA0681.3	PHOX2B	137	605	1745	186	221	196	320	457	190	187	176	194	304	215	297	406	234	262	1170	331	93	54	71	65	59	40	58	78	240	49	72	94	89	88	82	50	32	25	46	36	38	134	76	44	50	52	225	70
MA0682.3	PITX1	0	0	0	0	0	0	0	0	0	0	0	0	0	0	0	0	0	0	0	0	0	0	0	0	0	0	0	0	0	0	0	0	0	0	0	0	0	0	0	0	0	0	0	0	0	0	0	0
MA0683.2	POU4F2	180	1400	5949	360	159	292	377	348	368	278	130	133	153	372	407	581	144	169	1290	415	204	70	85	92	77	61	100	98	130	86	194	100	77	73	175	67	53	56	76	54	103	112	84	87	80	58	213	66
MA0684.3	RUNX3	2398	3345	7502	5447	1018	5026	5385	4657	3368	5065	1116	1358	1154	5320	2935	2258	1187	977	19592	4770	1444	1016	1086	695	1189	948	1073	1650	2062	1454	1344	1218	1408	1206	1566	1316	530	1044	1021	926	1535	1635	1211	1222	1223	590	1794	1257
MA0685.2	SP4	80498	272021	362515	147308	128961	429641	155971	296606	333761	468993	155585	375703	215263	260922	328893	226073	210779	415092	188537	326267	190848	307361	356495	258980	160294	217152	384655	296624	313271	312626	242647	85454	405628	114981	218792	118245	137011	206656	148101	204406	238239	162427	201004	273928	447018	222017	286878	106403
MA0686.2	SPDEF	2549	1364	4881	1011	1449	3078	4124	3591	2984	3018	995	1249	1800	4056	2307	1317	1421	971	38498	3960	1841	946	1199	903	845	420	1073	1170	1925	1440	802	1057	1000	754	872	710	913	750	888	766	861	1156	1111	739	925	512	1711	683
MA0687.2	SPIC	1978	9148	11178	3702	4758	7406	8000	8170	9680	8164	5253	4067	7280	12073	6691	5717	7470	4350	26092	8448	4686	3025	3409	2684	2814	2111	3856	3451	4909	4383	3249	3652	3677	3696	8083	2804	2148	2816	2671	2421	2985	5612	3216	4514	2881	2286	6770	3016
MA0688.2	TBX2	7801	4638	12342	3346	2046	9846	14121	10855	9095	11540	2320	6605	2120	11309	6697	3574	2243	2074	22724	12953	3312	2115	2372	1724	2760	2175	2351	4458	4034	3407	2510	3637	2538	2683	3777	1975	1221	1717	2579	1742	1799	3341	2982	2627	3370	1701	3816	2578
MA0689.1	TBX20	2849	5181	13072	4881	2242	10639	13552	12297	9673	12284	2226	2729	2282	12131	7686	4177	2202	2509	28772	15871	3146	3033	2840	2073	3281	2605	2757	5127	3885	3532	2782	3518	2946	2933	4823	2369	1492	1964	2772	2185	2252	3413	3235	3583	3888	1745	3867	2879
MA0690.3	TBX21	1585	2672	8086	2678	1584	6854	10056	8076	5185	7997	1847	1494	2395	7498	4834	2306	1896	1659	15904	9632	2330	1511	1594	1323	1924	1538	1545	3027	2854	2336	1508	2403	1668	1928	2782	1509	929	1250	1782	1305	1349	2383	2374	1755	2437	1253	2865	1851
MA0691.1	TFAP4	1818	5666	5187	3420	1574	8938	9565	10974	11733	9721	2666	3117	2397	14249	11441	4103	2393	2049	26249	10731	3445	1802	2949	2222	3059	3251	2819	4036	6079	4028	2128	4899	3409	4449	4569	2566	1323	2469	3839	2589	2550	5453	4521	1789	3764	1821	4990	3956
MA0692.2	TFEB	1550	5912	12640	2200	886	4932	6744	6847	6049	4894	2144	3151	3221	6628	4255	1905	2867	1132	18728	7461	3127	963	1809	1773	1868	1101	2014	1881	1604	1866	1282	1202	2405	987	1700	2287	1993	2211	1160	1635	2088	1440	1452	1070	2550	879	1335	1003
MA0693.4	Vdr	523	1515	1569	629	418	4549	3473	10450	1896	4927	358	811	469	2303	1240	857	488	535	5344	10371	683	272	290	282	349	274	262	420	642	489	264	479	290	475	1201	449	154	240	392	270	311	566	517	288	393	230	578	430
MA0694.2	ZBTB7B	37625	64538	81830	40696	22156	73940	103497	93629	50174	89050	27970	35878	40584	65572	56559	44483	38883	23437	276638	107939	33294	15892	22279	15080	32737	12997	25326	30958	36099	27756	21319	15130	28385	12179	26465	12731	12252	14426	16099	16128	18777	18511	21591	19903	26599	9334	39340	9993
MA0695.3	ZBTB7C	38865	72777	51899	25964	21234	53006	77616	65886	47295	58613	21866	32195	32071	47586	47543	29329	29174	19951	231511	72469	27537	17110	20213	13441	25820	13452	20445	31493	19306	19312	14075	12669	18729	11046	21945	11671	8883	12847	12294	13441	13991	15644	16249	16072	20962	9818	19545	9277
MA0696.1	ZIC1	18834	63145	68569	52349	13345	78442	121864	106383	63141	98687	15791	23142	23807	76098	77692	29284	22278	24300	235553	124796	37931	27006	40138	28636	47494	18150	45498	44745	48538	37660	22345	24485	34424	16799	30741	17748	26833	25202	22403	27571	24763	23238	30001	31126	42055	13037	38341	14478
MA0697.3	Zic3	5035	30825	26379	20763	5489	45257	65543	56856	57842	55585	9652	9554	9080	58795	47858	15320	9957	12093	119151	66117	19232	13249	24310	17028	21529	13191	25869	23729	38510	25926	11336	22967	16324	17454	19737	11634	16833	16298	18114	16377	13203	21765	20442	15113	21791	9544	27056	15717
MA0698.2	ZBTB18	1206	5192	5888	3456	3846	7736	9265	9493	9057	13347	2545	2086	2136	8712	6658	7926	2008	1866	27793	10312	3509	1469	2092	1606	2238	2016	2142	3458	5060	3271	2025	4450	2692	3481	4098	3744	1249	2294	2680	1984	2614	4141	3071	1541	2775	1226	5967	3437
MA0699.2	LBX2	0	0	0	0	0	0	0	0	0	0	0	0	0	0	0	0	0	0	0	0	0	0	0	0	0	0	0	0	0	0	0	0	0	0	0	0	0	0	0	0	0	0	0	0	0	0	0	0
MA0700.3	LHX2	0	0	0	0	0	0	0	0	0	0	0	0	0	0	0	0	0	0	0	0	0	0	0	0	0	0	0	0	0	0	0	0	0	0	0	0	0	0	0	0	0	0	0	0	0	0	0	0
MA0701.3	LHX9	291	396	1155	1008	169	482	655	527	881	446	379	433	507	460	394	293	469	184	1404	548	184	108	315	116	164	89	389	297	313	236	803	233	562	227	196	348	114	142	189	154	420	362	252	158	192	92	496	154
MA0702.3	LMX1A	0	0	0	0	0	0	0	0	0	0	0	0	0	0	0	0	0	0	0	0	0	0	0	0	0	0	0	0	0	0	0	0	0	0	0	0	0	0	0	0	0	0	0	0	0	0	0	0
MA0703.3	LMX1B	195	356	4606	552	105	278	323	905	303	311	127	151	171	252	346	225	155	155	1594	1259	116	80	194	82	136	65	282	282	315	151	1062	220	435	227	186	266	65	154	143	123	324	300	138	173	190	54	637	153
MA0704.2	Lhx4	0	0	0	0	0	0	0	0	0	0	0	0	0	0	0	0	0	0	0	0	0	0	0	0	0	0	0	0	0	0	0	0	0	0	0	0	0	0	0	0	0	0	0	0	0	0	0	0
MA0705.2	Lhx8	0	0	0	0	0	0	0	0	0	0	0	0	0	0	0	0	0	0	0	0	0	0	0	0	0	0	0	0	0	0	0	0	0	0	0	0	0	0	0	0	0	0	0	0	0	0	0	0
MA0706.2	MEOX2	378	479	1579	1553	150	508	517	1042	435	765	181	154	170	380	366	193	164	162	1885	1413	179	109	220	134	161	106	262	301	247	239	643	181	438	140	161	301	91	147	146	138	351	217	164	161	206	94	350	102
MA0707.3	MNX1	0	0	0	0	0	0	0	0	0	0	0	0	0	0	0	0	0	0	0	0	0	0	0	0	0	0	0	0	0	0	0	0	0	0	0	0	0	0	0	0	0	0	0	0	0	0	0	0
MA0708.3	MSX2	0	0	0	0	0	0	0	0	0	0	0	0	0	0	0	0	0	0	0	0	0	0	0	0	0	0	0	0	0	0	0	0	0	0	0	0	0	0	0	0	0	0	0	0	0	0	0	0
MA0709.2	Msx3	0	0	0	0	0	0	0	0	0	0	0	0	0	0	0	0	0	0	0	0	0	0	0	0	0	0	0	0	0	0	0	0	0	0	0	0	0	0	0	0	0	0	0	0	0	0	0	0
MA0710.2	NOTO	291	396	1155	1008	169	482	655	527	881	446	379	433	507	460	394	293	469	184	1404	548	184	108	315	116	164	89	389	297	313	236	803	233	562	227	196	348	114	142	189	154	420	362	252	158	192	92	496	154
MA0711.2	OTX1	0	0	0	0	0	0	0	0	0	0	0	0	0	0	0	0	0	0	0	0	0	0	0	0	0	0	0	0	0	0	0	0	0	0	0	0	0	0	0	0	0	0	0	0	0	0	0	0
MA0712.3	OTX2	2755	5782	16520	6041	2206	6225	6464	6392	4240	6791	2058	2033	2123	7841	4319	3937	2096	1826	18266	6438	2038	1189	1665	1273	1569	1029	1895	1776	3002	2911	3503	2200	2243	1961	2249	1804	1067	1468	1579	1100	2432	2493	1770	1332	1657	970	2895	1928
MA0713.1	PHOX2A	135	501	1538	356	259	281	295	539	176	244	158	206	189	287	178	222	173	123	1108	373	104	73	99	71	61	50	83	76	301	67	903	129	342	94	154	99	52	65	76	59	210	182	90	64	58	54	231	100
MA0714.2	PITX3	0	0	0	0	0	0	0	0	0	0	0	0	0	0	0	0	0	0	0	0	0	0	0	0	0	0	0	0	0	0	0	0	0	0	0	0	0	0	0	0	0	0	0	0	0	0	0	0
MA0715.1	PROP1	108	582	2067	301	206	187	297	618	137	159	182	332	325	291	147	206	217	117	1107	318	92	35	80	70	57	49	68	56	217	50	158	55	109	74	52	65	42	39	52	42	123	123	65	41	55	48	149	42
MA0716.2	PRRX1	0	0	0	0	0	0	0	0	0	0	0	0	0	0	0	0	0	0	0	0	0	0	0	0	0	0	0	0	0	0	0	0	0	0	0	0	0	0	0	0	0	0	0	0	0	0	0	0
MA0717.2	RAX2	0	0	0	0	0	0	0	0	0	0	0	0	0	0	0	0	0	0	0	0	0	0	0	0	0	0	0	0	0	0	0	0	0	0	0	0	0	0	0	0	0	0	0	0	0	0	0	0
MA0718.2	RAX	0	0	0	0	0	0	0	0	0	0	0	0	0	0	0	0	0	0	0	0	0	0	0	0	0	0	0	0	0	0	0	0	0	0	0	0	0	0	0	0	0	0	0	0	0	0	0	0
MA0719.2	RHOXF1	0	0	0	0	0	0	0	0	0	0	0	0	0	0	0	0	0	0	0	0	0	0	0	0	0	0	0	0	0	0	0	0	0	0	0	0	0	0	0	0	0	0	0	0	0	0	0	0
MA0720.2	Shox2	0	0	0	0	0	0	0	0	0	0	0	0	0	0	0	0	0	0	0	0	0	0	0	0	0	0	0	0	0	0	0	0	0	0	0	0	0	0	0	0	0	0	0	0	0	0	0	0
MA0721.2	UNCX	0	0	0	0	0	0	0	0	0	0	0	0	0	0	0	0	0	0	0	0	0	0	0	0	0	0	0	0	0	0	0	0	0	0	0	0	0	0	0	0	0	0	0	0	0	0	0	0
MA0722.2	VAX1	291	396	1155	1008	169	482	655	527	881	446	379	433	507	460	394	293	469	184	1404	548	184	108	315	116	164	89	389	297	313	236	803	233	562	227	196	348	114	142	189	154	420	362	252	158	192	92	496	154
MA0723.3	VAX2	0	0	0	0	0	0	0	0	0	0	0	0	0	0	0	0	0	0	0	0	0	0	0	0	0	0	0	0	0	0	0	0	0	0	0	0	0	0	0	0	0	0	0	0	0	0	0	0
MA0724.1	VENTX	215	562	1035	679	200	764	839	915	530	881	226	375	206	722	693	540	217	190	3292	866	221	107	127	103	114	96	135	164	139	111	551	114	198	101	168	149	89	93	75	83	168	111	164	108	125	90	140	104
MA0725.2	VSX1	291	396	1155	1008	169	482	655	527	881	446	379	433	507	460	394	293	469	184	1404	548	184	108	315	116	164	89	389	297	313	236	803	233	562	227	196	348	114	142	189	154	420	362	252	158	192	92	496	154
MA0726.2	VSX2	291	396	1155	1008	169	482	655	527	881	446	379	433	507	460	394	293	469	184	1404	548	184	108	315	116	164	89	389	297	313	236	803	233	562	227	196	348	114	142	189	154	420	362	252	158	192	92	496	154
MA0727.2	NR3C2	674	3337	3023	5197	577	4076	4705	4968	2844	4770	553	655	745	7411	2784	1392	677	1002	8564	5187	1215	1112	2007	1214	1879	1604	1875	2785	2306	2041	1111	1991	1345	1688	2104	1616	1257	1396	1544	1131	1245	1901	1968	1572	1931	721	2307	1543
MA0728.1	Nr2F6	10673	7186	12642	5964	1877	14452	17133	18325	11606	15841	2017	7306	2552	10436	9092	3656	2740	2402	32288	19107	3126	1970	2594	1586	2352	1579	2696	4047	4318	3748	4784	2491	4756	2491	3373	4030	1398	2911	2067	2009	4326	3214	2576	2132	2779	1485	5941	2172
MA0729.1	RARA	11860	13861	13161	6123	3026	14310	16238	17050	11394	17215	3132	7438	4139	12876	12995	4817	3848	3047	46965	18996	4052	3131	3324	2069	3016	1949	3278	4621	5898	3887	5658	3835	5751	3184	5539	4594	1795	3989	2722	2329	4893	4101	3178	3592	3584	2023	5422	2806
MA0730.1	RARA	5400	7857	26562	15908	4102	29679	32589	35113	23520	34601	9814	17419	14527	25647	21364	8119	13343	5316	72213	37761	8158	5826	9665	5475	8185	5034	10377	15258	23743	14999	15019	14831	18833	10864	13493	13078	6248	10280	9411	6812	17530	15151	11952	8133	10370	4239	26306	9050
MA0731.1	BCL6B	629	1687	1885	1298	499	1866	2063	1661	2065	2387	744	821	909	2197	1836	1845	1010	577	5931	1790	1144	764	460	443	595	454	483	901	1013	1006	286	911	417	825	1709	387	445	282	692	304	305	1079	777	426	576	404	1179	675
MA0732.2	EGR3	61835	225651	211941	103445	70799	155190	296646	241322	133883	178094	75718	73810	113578	185021	150067	130983	116788	74247	289951	286190	119498	39781	51515	52443	113578	26883	59769	61127	64955	63210	41181	29769	62804	19169	43696	21690	36042	37586	31242	42607	40744	29283	44915	48700	68722	31381	58468	19532
MA0733.2	EGR4	95763	322047	256517	152753	104505	244555	437588	379986	220665	271954	133156	131208	191990	291192	236237	211230	190112	117203	251587	439689	174257	61308	74744	74828	149320	46001	83940	91302	90731	89081	62706	45939	95346	32667	66928	36675	46714	55591	45738	61152	60419	47822	63801	71580	99781	52851	81446	30951
MA0734.4	Gli2	18449	44228	40583	25926	10593	46174	55289	52183	45296	51334	18613	24264	23460	49476	50672	22452	21983	16192	186355	56572	24729	11477	18523	11034	20451	12549	19351	24979	26935	21890	13115	14742	16928	13284	20766	11764	10349	13005	13688	13249	12065	17676	17455	13320	22720	7542	24755	12204
MA0735.2	GLIS1	12171	21573	28854	18019	4936	23730	41635	29792	20524	27155	6366	9052	7559	23651	19288	12949	7869	7377	73786	31266	10154	7821	8317	7450	12366	5400	9591	12079	11072	9649	7915	5881	11506	4288	8771	5358	6402	6423	5561	6637	7091	6589	7435	8855	11390	4077	10860	3600
MA0736.1	GLIS2	62144	189614	181702	118899	42014	142196	227489	204519	127981	192962	45509	55802	65054	153434	141888	90237	63751	50103	491515	239959	81446	43256	58960	43548	87065	29772	67634	72503	59505	56320	44566	30987	63225	23273	50894	28625	31260	35498	27877	37882	38948	33438	37746	51535	67194	25097	58850	17926
MA0737.1	GLIS3	21838	73499	89143	54448	13954	64255	91524	83358	62180	85286	17602	24113	21200	60504	61923	30354	21749	18879	231923	90643	28066	17547	21297	14903	27736	12943	24034	28576	27396	23783	26350	13876	31635	11373	24018	14404	12087	14181	12488	14516	19496	16951	16373	20483	26891	9634	29462	8800
MA0738.2	HIC2	0	0	0	0	0	0	0	0	0	0	0	0	0	0	0	0	0	0	0	0	0	0	0	0	0	0	0	0	0	0	0	0	0	0	0	0	0	0	0	0	0	0	0	0	0	0	0	0
MA0739.2	Hic1	6115	8676	18919	9407	2897	15991	16462	17044	22190	17871	6242	6419	5926	20901	17730	8287	5777	8127	50639	17334	8097	5011	9656	4957	8784	5423	9447	14277	13076	10227	5752	11488	8607	9422	9150	7041	5126	8103	7161	7403	7394	12181	8309	5560	8166	3289	14542	8287
MA0740.2	KLF14	151407	431193	434107	220710	174403	216703	385726	335152	178879	272719	279191	351010	362246	289680	178701	373955	362140	232057	258505	366037	302309	147994	142957	118612	215874	117601	155848	184951	232139	183472	123903	124586	175942	104493	178276	101808	72874	117891	113397	122046	124489	139927	144717	130581	203606	98044	199922	92900
MA0741.1	KLF16	85449	248857	191138	106278	477281	350831	330936	248041	283584	374355	441283	288928	119677	340625	161199	455416	125373	281069	249312	318251	107049	237869	270482	171299	81068	180214	284490	233505	210048	220548	196258	33996	330044	84711	164702	90404	82589	147928	96078	142930	178391	120649	127992	204262	349271	171966	198927	71163
MA0742.2	KLF12	79975	275148	366014	152560	142227	444677	213435	175992	360779	257661	162856	215231	225385	130800	342580	233735	223689	167204	283080	193319	204167	92205	110605	92781	167949	82857	123747	133751	180511	138529	84102	88146	125865	68443	130259	69903	66674	88147	82464	91763	93051	98326	107133	97325	152630	69149	146846	63395
MA0743.3	SCRT1	1784	3877	6100	3989	3010	6151	7791	6887	7649	7453	6096	8056	2016	6262	6429	4038	1874	2061	24699	7338	2880	1119	1825	1119	1550	1269	1874	3059	2378	2052	1497	1900	1813	1753	2215	1605	985	1488	1475	1358	1733	2307	1787	1163	1804	882	2287	1571
MA0744.3	SCRT2	1937	4318	6673	3593	2769	6903	7731	7857	8923	8122	6160	3814	2278	7648	6815	3842	2037	2098	26873	8297	3096	1244	1853	1226	1864	1350	1899	2925	2295	2057	1223	1857	1627	1700	2250	1291	1125	1455	1409	1362	1374	2230	1813	1237	1848	1015	2187	1469
MA0745.3	SNAI2	5601	8294	24001	13214	4901	26097	29156	32776	37409	36402	6830	20191	7005	30165	23316	13623	7238	6485	92938	37474	11957	4120	8057	5998	8247	5734	7961	9054	14148	11803	4585	11522	6270	9309	9412	4869	4620	6513	7668	6052	5269	11748	8976	4299	8464	3994	14137	8014
MA0746.3	SP3	78774	214020	191175	105126	79365	312667	249811	451715	258130	349331	112514	149217	156504	336288	248158	150377	161781	104304	458004	246850	141081	48054	55919	46813	95521	49896	64151	67379	110483	77450	54342	45778	81649	35522	73025	39891	28495	50887	43616	54217	55122	53774	59609	55114	88939	39950	82467	31848
MA0747.2	SP8	46295	103957	492321	283817	489121	325167	156851	450204	285586	347544	451770	312960	69010	395492	348287	492465	287213	282615	365862	146453	252128	242627	271219	167967	41692	182097	283695	234404	190676	212398	203219	13811	339252	83999	154952	93062	75896	147723	91310	142787	181786	115540	120817	204908	348271	172852	187808	69300
MA0748.3	YY2	1227	3560	6234	4282	2035	5789	9070	7013	4651	6443	2418	2150	2848	7109	5046	5036	2833	2367	17876	7369	4360	2480	3481	2331	3952	1357	3790	3491	10715	3062	2951	1797	2799	1084	3121	1700	2653	2303	1838	2527	2339	1713	2582	2776	3432	1054	3306	1248
MA0749.2	ZBED1	57	307	1674	120	59	220	268	291	120	211	56	57	69	179	144	110	44	69	1006	356	475	109	174	89	124	61	208	167	334	166	390	171	231	138	174	134	80	86	171	104	173	143	157	127	108	40	278	86
MA0750.4	ZBTB7A	20098	54809	81108	57448	15343	111640	130246	126260	60132	155500	20163	29405	25804	86530	101731	36777	27079	17894	219518	144453	37614	30586	44453	28393	45752	19285	51949	47902	72831	54812	40740	36690	41761	26177	51706	20766	29985	24395	32013	22214	37146	38429	38617	32892	46300	14030	76707	22088
MA0751.2	ZIC4	22209	74298	79383	57801	15373	85421	138507	116600	69807	108698	18172	26523	27500	84432	86777	33876	26064	29736	261537	137615	43169	30281	46772	33162	56321	19872	53530	49249	49859	43017	25636	26322	39402	18148	36304	19182	30838	28023	25293	30615	28102	26352	34224	35516	48824	14587	44561	15533
MA0752.2	ZNF410	3852	5020	15711	10198	2537	10493	8741	9644	9188	11173	4189	3543	3651	7562	7575	4628	3408	3455	38287	11435	3443	2845	3369	1702	2523	2168	3555	4217	12768	6367	12391	26959	9077	5178	4274	5705	1521	3833	3886	3147	7067	7697	3574	3732	3471	1520	9921	5001
MA0753.3	ZNF740	465460	54363	39851	19971	454156	365929	34728	32493	331981	396043	468543	387815	19178	449042	365387	304643	318320	349070	69826	36905	19959	475235	251635	405747	487792	348303	274486	281482	417754	442613	443909	2071	335161	186203	375079	217773	164460	309048	194362	308436	369453	259966	262942	452568	323749	382211	419594	144131
MA0754.3	CUX1	521	186	745	158	41	170	183	195	101	166	74	64	59	159	103	153	131	51	700	194	67	75	17	30	30	36	20	50	84	28	66	47	40	29	42	27	29	23	20	25	29	73	40	64	46	26	33	29
MA0755.2	CUX2	371	163	737	106	36	169	583	188	64	314	65	50	64	115	74	81	49	45	477	175	51	52	33	26	38	25	24	49	58	26	28	125	59	52	73	20	26	24	16	16	27	49	29	46	27	44	53	44
MA0756.3	ONECUT2	216	244	545	178	67	314	274	424	152	686	103	104	102	320	203	138	88	81	1053	390	206	121	95	75	118	59	104	148	174	146	383	206	146	124	124	121	61	111	95	72	142	158	113	176	115	51	229	101
MA0757.2	ONECUT3	455	658	1625	174	646	270	398	417	215	265	147	166	144	1364	1721	313	158	115	3548	368	99	93	65	81	97	63	76	121	244	84	116	131	100	117	155	62	57	44	78	55	64	186	112	87	96	59	222	109
MA0758.1	E2F7	1852	18810	8520	9000	4515	13954	18233	12982	9095	19367	4154	4223	5639	9801	7487	7411	4831	3513	30247	16646	3797	2540	2757	2729	3397	2041	3177	4657	14408	5743	4392	4565	6188	5780	12805	2452	2142	1847	2821	1693	3852	12196	5963	3486	3371	2030	24807	4150
MA0759.3	ELK3	6156	2006	3693	1710	1329	3514	4822	4160	2423	3139	1518	1145	1869	4741	3293	1924	1502	1290	19442	4730	2543	933	579	819	932	271	781	891	1588	1151	1119	704	1183	367	1022	677	589	865	656	1022	1126	908	873	810	824	419	1346	343
MA0760.2	ERF	2358	1531	8413	1580	942	4442	5837	5029	2764	4684	686	706	1345	3607	3349	1269	1014	1362	10010	5259	1282	549	301	376	446	220	379	686	1084	582	1150	468	780	330	546	526	319	532	422	621	760	590	537	517	476	235	781	305
MA0761.3	ETV1	3964	7095	23891	8726	3976	22310	22771	23645	19087	24710	4808	5341	5602	23462	14859	7953	5553	5975	52090	24459	10570	3998	4580	3464	3800	3145	4761	6551	7851	4728	3340	4419	3912	3995	7136	2985	3098	3249	3768	3283	3271	4877	4274	3630	4529	2726	5102	3684
MA0762.2	ETV2	2025	1405	37371	1282	912	2285	3574	2626	1755	2323	557	580	1167	2254	2359	1186	786	802	7442	2875	1089	818	270	379	359	209	325	573	922	495	886	458	542	310	426	407	245	438	320	469	577	640	473	683	410	269	694	296
MA0763.2	ETV3	3914	1565	6725	1161	1026	2713	3638	3337	3009	2584	1215	757	1376	3371	2780	1153	1054	980	11142	3763	1829	550	287	471	519	209	394	649	1190	695	1035	412	770	257	803	497	307	519	338	684	805	687	534	481	522	281	727	255
MA0764.4	ETV4	6622	1698	6913	1859	1548	3309	4979	4294	2600	3273	1420	1058	1765	4661	3215	1840	1424	1214	12558	4797	2337	814	513	717	639	219	691	840	1574	942	1292	538	1101	288	879	635	504	760	491	917	1061	694	704	701	697	387	882	295
MA0765.4	ETV5	6351	1541	3504	1302	1252	2956	4268	3702	2275	2737	1402	1001	1722	4155	2931	1764	1356	1160	12966	4220	2240	787	488	640	633	215	667	727	1390	930	1023	573	1071	292	868	614	473	721	467	915	1028	826	714	656	661	353	970	284
MA0766.3	GATA5	1294	1230	3301	1256	613	2086	1944	1826	1464	1963	915	909	1206	1507	985	1026	1108	501	7865	1955	569	428	520	435	544	372	535	628	588	513	742	418	432	434	457	521	296	399	362	349	403	621	445	462	527	290	804	398
MA0767.2	GCM2	4144	11366	32655	10347	3596	22277	29184	28181	16173	25284	7117	7705	7006	20827	14067	7845	7555	4524	66786	29764	8338	5853	5764	4542	9428	3962	5883	8012	7945	7115	12548	5187	12038	4535	5889	4825	4655	5278	4617	5612	6213	5326	5384	8038	7453	2891	8609	4233
MA0768.3	Lef1	1509	2678	4745	1259	1283	2779	4059	3137	2174	3039	1282	1285	1533	3957	2417	1972	1512	1333	9921	3297	1703	768	690	704	828	923	707	1071	824	876	679	764	670	830	1090	654	528	510	685	530	646	941	797	1609	790	647	1779	750
MA0769.3	TCF7	849	1130	2340	624	495	985	1497	1165	1176	1050	514	494	538	1190	1014	776	525	633	4308	1217	712	304	253	296	334	524	257	467	357	406	277	357	290	351	585	243	191	238	323	228	237	416	336	1163	345	260	414	315
MA0770.1	HSF2	499	770	923	330	409	963	968	1094	532	1040	401	445	470	966	1268	740	490	661	2799	1042	682	165	185	196	237	156	192	291	1084	700	163	526	249	519	646	191	177	274	551	221	228	868	619	201	240	169	1106	455
MA0771.1	HSF4	542	1359	1168	545	395	1485	1634	1791	725	1658	421	650	451	1493	1060	836	435	693	3822	1635	835	270	298	316	352	244	311	448	1370	1085	243	766	290	755	1689	224	277	298	820	224	241	1065	835	311	347	210	1106	680
MA0772.2	IRF7	316	3078	1558	482	686	1508	2055	1605	1184	1556	706	618	796	1012	990	1066	887	622	3455	1702	651	593	380	470	854	528	431	696	885	629	307	616	413	647	684	234	221	307	462	263	323	845	654	897	569	354	827	769
MA0773.1	MEF2D	217	668	3481	2038	300	1431	1219	1411	1059	2472	190	215	223	408	411	380	203	191	1641	1687	228	159	131	106	150	90	180	185	225	150	202	126	120	158	170	62	91	101	130	100	107	276	157	133	128	104	322	110
MA0774.1	MEIS2	2452	4103	10392	3688	1933	9663	11779	10059	9988	11153	1865	2002	1560	10003	6221	2623	1677	2110	23361	11343	2697	2053	6212	1793	2837	2340	5552	4988	5657	4601	1957	4498	2241	3457	3949	1963	1692	2181	3332	1942	1945	4734	4121	2295	3637	1453	4812	3137
MA0775.2	MEIS3	1081	1167	1594	686	394	1285	3151	1356	4188	1360	604	402	548	1403	1080	776	477	504	4658	1560	890	276	208	220	297	263	224	395	384	356	190	290	214	340	399	172	171	171	316	201	183	444	299	265	344	245	411	253
MA0776.1	MYBL1	208	424	1929	556	155	727	1105	817	393	3559	158	178	209	669	443	313	311	165	2093	921	238	257	320	341	401	209	334	364	164	178	273	182	260	163	179	160	364	214	154	204	178	228	219	280	425	175	257	101
MA0777.1	MYBL2	348	631	1183	655	304	682	1256	804	435	724	203	198	545	849	543	521	211	157	2339	960	274	218	224	278	342	216	243	336	191	259	199	155	194	173	199	139	218	129	140	175	130	269	243	202	501	130	295	108
MA0778.2	NFKB2	25651	44512	62704	55083	9805	73322	111100	85053	65597	83377	16216	22384	23294	84157	71643	36675	23863	12459	275315	96268	31280	26127	41692	24803	50444	25719	44947	63113	72287	48282	16500	39075	24762	28585	46648	13452	25950	20836	33196	19339	17302	40007	43050	35079	47939	14341	64427	21781
MA0779.2	PAX1	1044	1072	3871	1222	765	3359	3807	4165	3103	4483	1145	1194	1357	3179	2979	1415	1256	909	9066	4268	1836	1423	1973	1310	2142	1012	2083	2034	4863	2049	1105	1535	1554	1051	1702	930	1478	1302	1415	1281	1251	1512	1740	1498	1960	681	2321	1005
MA0780.1	PAX3	100	325	3277	216	135	357	1214	623	129	249	111	151	91	285	146	186	113	96	3840	456	97	47	61	50	59	32	139	94	94	66	208	140	301	73	114	105	44	48	54	38	122	111	66	66	61	26	320	81
MA0781.2	PAX9	1445	1039	4493	1327	535	3376	4473	4755	3504	4541	1308	1402	1553	3285	2901	1387	1500	902	9905	4955	1982	1278	1935	1376	2215	1006	2052	1913	4698	2097	1134	1526	1696	1086	1918	892	1388	1367	1503	1373	1220	1602	1776	1484	1915	860	2483	1070
MA0782.3	PKNOX1	2382	3709	15487	6030	1445	9245	9985	8860	8545	10094	2883	2137	2040	9896	6120	2905	1907	1868	20621	9508	2284	5992	2566	1538	2812	6037	2600	4354	7388	5096	1495	5521	2135	4071	4203	1923	1456	2060	3418	1539	1971	5133	4147	2094	8307	1813	7376	3747
MA0783.1	PKNOX2	1487	2966	6903	2114	701	4369	5209	4542	9525	5213	1206	896	824	6120	6224	2085	809	1166	19005	4780	2025	777	1231	1013	1528	1330	1234	1794	2774	2796	744	2450	1149	1771	1664	878	769	1107	1608	1018	920	2439	1812	801	1653	770	2096	1629
MA0784.3	POU1F1	201	584	922	618	251	377	458	415	477	400	200	179	311	370	392	654	207	196	2320	489	276	105	124	109	131	110	94	113	188	127	309	122	249	138	120	89	81	84	122	69	121	159	113	105	129	75	311	121
MA0785.2	POU2F1	204	558	856	344	294	521	629	681	562	493	225	185	184	1263	444	654	205	254	2997	779	372	145	154	121	162	109	141	140	175	144	371	99	437	136	112	118	96	123	133	123	142	180	143	121	152	86	286	139
MA0786.2	POU3F1	213	615	722	429	273	374	425	436	390	384	187	159	157	374	350	597	178	207	2354	497	295	123	117	92	125	84	90	129	157	121	254	114	244	131	113	79	71	92	104	85	112	157	104	94	123	80	238	120
MA0787.1	POU3F2	180	490	706	348	232	334	391	376	455	337	177	160	283	1086	334	541	173	183	2294	436	249	99	127	99	126	84	99	113	198	116	256	112	234	146	121	86	74	80	107	72	109	179	102	103	113	69	303	120
MA0788.1	POU3F3	135	392	635	335	172	242	296	270	288	214	147	130	255	1027	218	468	153	130	1806	289	189	72	109	74	91	47	74	74	229	92	223	96	188	136	103	61	58	55	91	44	86	199	97	65	90	47	330	119
MA0789.1	POU3F4	184	720	918	463	297	552	676	708	635	533	289	234	228	1330	478	671	267	279	3003	800	404	168	160	137	175	115	149	155	187	154	367	120	455	142	118	131	99	139	148	131	152	180	147	133	161	99	278	146
MA0790.2	POU4F1	102	425	2746	323	124	206	275	255	220	206	119	102	113	299	206	572	129	114	885	324	105	53	74	62	78	54	85	77	114	71	117	81	65	58	196	48	32	49	61	40	64	96	69	68	83	40	174	49
MA0791.2	POU4F3	109	482	2712	325	134	211	282	283	225	210	120	111	131	272	217	293	128	119	942	369	116	54	79	72	86	65	83	89	124	75	125	84	68	68	197	60	37	51	62	39	70	109	74	67	87	40	178	49
MA0792.1	POU5F1B	211	593	889	374	309	568	731	718	600	540	242	210	210	1300	470	702	226	268	3188	814	418	161	154	135	185	123	144	162	178	151	309	123	451	152	133	125	109	135	142	141	147	189	151	131	171	102	310	161
MA0793.2	POU6F2	787	698	2355	1431	234	1017	1236	1133	1036	1034	464	469	558	973	827	473	488	231	2793	1034	316	384	348	203	283	213	403	456	458	336	799	287	502	311	322	346	204	251	288	260	380	339	325	314	358	153	560	298
MA0794.1	PROX1	380	702	1698	428	440	1021	1279	1247	744	952	368	417	543	1210	771	1797	468	496	2925	2817	652	250	417	427	415	239	445	459	460	914	223	247	501	214	387	276	277	232	200	240	255	257	316	279	378	258	264	165
MA0795.1	SMAD3	422	1474	1609	329	290	1253	1676	1725	1279	1479	266	362	634	2855	1028	521	583	653	5408	1676	462	126	1028	200	214	170	1052	218	187	236	117	168	100	149	169	90	119	101	129	92	93	234	186	161	262	184	196	137
MA0796.1	TGIF1	621	1447	2986	1346	644	2347	2692	2499	5675	3673	886	697	564	3334	2342	1001	496	784	7130	2515	1044	507	732	585	1006	890	722	1179	1866	1241	532	1431	705	1150	1279	622	432	664	1058	664	633	1651	1189	548	1156	482	1538	1034
MA0797.1	TGIF2	1953	1661	2873	1644	774	2733	3192	2889	6879	3892	948	693	642	3806	2924	1317	586	914	11366	2886	1350	668	951	742	1261	1038	938	1373	2077	1475	603	1718	875	1309	1346	658	569	814	1309	764	734	1916	1507	659	1380	566	1630	1228
MA0798.3	RFX3	663	1901	2294	1342	832	2324	2853	2832	3387	2811	541	667	683	2916	2888	1736	688	896	11946	3098	1748	1054	1276	981	1502	668	1329	1979	1766	1324	1209	986	1726	1288	1153	1179	1174	1322	946	974	1795	2406	1110	1234	1446	563	1736	954
MA0799.3	RFX4	1490	1861	12545	5042	1312	3914	6486	4272	4171	4702	846	914	1057	6450	3452	2497	924	1419	11087	10633	2301	1097	1709	1379	2284	1143	1777	2262	8660	2113	928	1426	1219	1144	1911	948	1121	1257	1661	1210	1016	1543	1434	1247	2096	811	1438	1017
MA0800.2	EOMES	2241	2090	7061	3130	1336	5433	9388	6289	4267	6303	1832	1591	2445	6027	4108	2103	1914	1496	12085	7043	2369	1235	1282	1031	1556	1219	1285	2534	2490	1995	1408	2181	2805	1547	2010	1329	711	1084	1437	1113	1197	1979	1913	1515	2130	846	2477	1435
MA0801.1	MGA	7158	4590	12299	4381	1729	8785	12426	9689	8850	10305	2321	6392	2945	10279	6330	2816	2450	1937	20382	11036	3501	2082	2455	1671	2801	2229	2381	4431	4151	3666	2145	3971	2657	2823	3642	1997	1173	1765	2685	1881	1868	3329	3358	2519	3510	1329	4093	2616
MA0802.2	TBR1	1263	2100	6196	1890	1379	5012	8819	5730	4137	6082	1046	1270	972	5164	4166	3287	933	1377	12570	6395	2118	1153	1197	916	1368	1117	1181	2435	2082	1684	1254	1755	1468	1290	1715	1191	620	935	1231	990	1020	1726	1475	1415	1917	780	2018	1299
MA0803.1	TBX15	8391	6272	18916	6959	3070	15565	19017	16797	15186	17479	4968	12485	5972	27183	10882	6041	5098	3684	43051	18315	5431	3814	4401	3321	5113	3985	4352	7699	7722	7660	3812	7162	4504	5460	7916	3752	2524	3465	5011	3594	3511	6954	6070	4323	5671	2730	7446	5161
MA0804.2	TBX19	577	499	2110	866	322	782	900	865	1114	780	409	618	449	962	656	383	440	261	2834	850	382	270	404	277	402	248	374	569	707	1141	261	763	366	479	388	448	260	456	483	304	443	587	462	283	474	175	809	427
MA0805.1	TBX1	7736	3545	12020	4492	1785	9395	13173	10078	8698	10825	2435	6279	2846	11368	6504	3014	2378	1835	19623	11389	3196	1950	2270	1563	2628	2105	2236	4076	4226	3610	2101	3957	2551	2803	3635	1859	1131	1777	2719	1760	1761	3405	3295	2404	3282	1303	3991	2643
MA0806.1	TBX4	7736	3545	12020	4492	1785	9395	13173	10078	8698	10825	2435	6279	2846	11368	6504	3014	2378	1835	19623	11389	3196	1950	2270	1563	2628	2105	2236	4076	4226	3610	2101	3957	2551	2803	3635	1859	1131	1777	2719	1760	1761	3405	3295	2404	3282	1303	3991	2643
MA0807.1	TBX5	8325	6846	21350	6332	3187	17130	21859	18884	17935	19747	4314	8090	4734	20663	12581	8287	4293	3509	41061	20602	5804	3132	4422	2800	4587	4039	4353	6801	8249	6404	3478	7359	4585	4986	6018	3316	1897	3370	4757	3390	3342	6147	5693	3833	6237	2259	7966	4746
MA0808.1	TEAD3	1080	2007	8309	3385	1138	3423	4077	4364	2107	4257	1239	1288	1230	3617	2410	5498	1209	1254	9385	4480	3088	988	581	379	588	465	485	756	1309	1231	500	1176	722	1032	1802	526	491	571	967	606	565	1324	1224	591	600	271	1404	1032
MA0809.3	TEAD4	1628	5215	11074	22558	2242	6749	7470	7770	4680	8294	2162	2357	2198	8769	5789	6978	2132	3601	21537	8208	4278	1403	1165	888	1309	1086	1127	1759	4591	3299	1160	3334	1392	3221	3907	1175	1601	1052	2744	1001	1174	4550	3198	1406	1345	702	5306	3264
MA0810.2	TFAP2A	44126	88102	191128	120558	27124	169958	253060	223997	121601	215496	30274	56946	41934	199793	147783	57025	41111	37020	409102	265701	83792	49146	90422	70269	108461	42815	104558	88625	110607	94522	37308	58987	59019	43959	78842	27780	61951	50398	58752	53570	43728	62426	78823	61750	94672	32138	98346	40569
MA0811.2	TFAP2B	22875	68223	178716	94590	18262	126943	175589	157659	87102	160049	18768	46888	26860	147990	115539	30793	26233	23521	293834	180821	57653	32255	58862	48777	69278	29996	67335	61394	78314	63205	21610	41935	35781	31846	54259	17930	45126	32925	40375	33559	26308	44855	54056	40236	63475	22472	66846	29504
MA0812.2	TFAP2B	19689	47000	58194	35705	12524	86823	111650	117650	61257	99951	12853	23995	15466	101690	69651	20729	16303	20942	144888	129767	37951	20861	31798	33727	43715	19729	37062	31585	45856	36882	14375	26126	24574	18807	30494	11396	29359	21411	26931	22543	18047	26775	34465	25724	39091	14426	39973	19908
MA0813.1	TFAP2B	39795	56136	101599	84054	22646	102018	151967	131449	78697	135360	26588	32674	41181	107180	129577	38261	33966	22639	326450	161936	52806	48524	56417	42843	61994	24986	64613	58414	64572	57324	23824	34645	35376	25790	53338	17844	39463	28202	33375	30425	25905	36207	46910	37585	56832	19271	55954	23311
MA0814.3	TFAP2C	17635	44565	46459	29207	14286	78161	96658	99562	56514	90423	11917	30132	15480	88583	57996	20707	15719	15320	162664	107098	34534	18112	28681	26142	35877	17522	32065	31109	41309	34938	11676	25290	20172	19685	31398	10533	22512	17186	24386	18493	14825	27213	30704	21432	33219	12565	38645	19289
MA0815.1	TFAP2C	41585	63292	94187	89775	25152	113164	170834	147811	84297	149290	25910	34673	44149	119470	140562	42459	36846	29873	361916	185677	60080	58001	64034	50470	73766	28017	74007	66296	77826	66496	26598	38797	40539	28168	59694	19527	45768	32072	38289	35079	29747	40136	53904	43722	66179	21652	64292	25792
MA0816.1	Ascl2	3247	14207	12645	14488	2733	24208	29512	30877	31705	28750	9367	5559	4457	44700	23708	8589	4314	5644	70534	33050	11733	6132	10736	7467	10857	8130	10680	10445	13719	10954	6377	12341	10415	10398	11351	7172	6087	8719	9686	8334	8092	11652	10143	5831	11387	5049	12028	9415
MA0817.2	BHLHE23	371	1387	2261	1083	478	1035	1118	1160	1933	1140	327	338	270	1067	2529	857	318	555	4023	1304	460	200	251	249	267	206	209	289	137	206	592	148	365	161	209	248	158	228	163	199	411	176	208	262	251	189	199	154
MA0818.2	BHLHE22	510	1553	2617	1692	549	1387	1526	1563	2133	1548	466	421	375	1423	3042	1175	430	692	5075	1694	687	295	372	332	404	280	338	431	227	302	1189	221	1016	262	320	617	238	452	240	355	1120	269	290	459	403	287	286	237
MA0819.3	CLOCK	1741	4524	13134	1523	871	4304	6829	5647	4811	5056	1498	1932	1997	6927	5078	1772	1738	1474	18687	5715	3194	1358	2933	2446	2801	1655	3031	3928	2876	2698	1737	2094	3389	1874	3074	3022	3552	3282	1910	2622	3243	2289	2438	1687	4159	1325	2545	1655
MA0820.2	FIGLA	0	0	0	0	0	0	0	0	0	0	0	0	0	0	0	0	0	0	0	0	0	0	0	0	0	0	0	0	0	0	0	0	0	0	0	0	0	0	0	0	0	0	0	0	0	0	0	0
MA0821.2	HES5	2170	3421	6959	3074	1492	7729	12631	10563	10391	8127	2357	3177	3628	14190	7341	4205	3090	2607	30669	11221	8154	2376	5580	7039	5765	2687	6442	5730	4703	5716	2576	3316	5321	2425	5029	3575	9918	5641	3223	4726	4618	3398	4081	2979	6289	2811	4883	2282
MA0822.1	HES7	1401	2984	11196	4251	1099	7995	12194	14465	12468	8764	1467	1695	1795	11906	9602	3131	1712	2199	29572	16655	6408	2472	5290	5527	5704	2838	5964	4962	5905	5475	2275	3802	3889	2742	4976	2410	6350	4098	3481	3623	2997	3847	4665	3142	5313	2278	5472	2446
MA0823.1	HEY1	2051	3717	10335	2428	1130	5955	9035	7730	7067	6002	2210	3138	3305	10578	5709	2548	2973	1900	24524	7923	5561	1817	4319	4580	4232	2074	4637	4605	3501	3795	2122	2568	4256	2045	3563	3432	6104	4467	2377	3465	3903	2652	3010	2210	4540	1996	3319	1779
MA0825.2	MNT	0	0	0	0	0	0	0	0	0	0	0	0	0	0	0	0	0	0	0	0	0	0	0	0	0	0	0	0	0	0	0	0	0	0	0	0	0	0	0	0	0	0	0	0	0	0	0	0
MA0826.1	OLIG1	442	2725	3819	1124	546	1221	1325	1294	1997	1296	425	771	347	1226	2720	996	409	657	5318	1401	563	253	303	279	326	243	249	351	188	254	681	191	443	219	269	302	201	263	206	265	473	217	240	330	317	226	235	203
MA0827.1	OLIG3	596	2967	4104	2441	548	1732	1743	1846	2279	1876	563	591	496	1703	2516	1426	566	839	5912	1858	909	361	438	368	444	329	394	522	283	347	1473	255	1170	297	397	676	267	479	276	404	1161	328	372	547	476	314	317	277
MA0828.3	SREBF2	643	1265	4031	839	528	1938	4630	2266	2363	2122	745	912	1000	2730	1848	816	932	383	5131	2604	675	333	373	349	514	346	439	751	1017	634	407	655	832	423	543	585	280	546	469	463	673	662	628	384	586	249	762	411
MA0829.3	SREBF1	714	2242	4311	1209	606	2826	6277	3318	3423	3214	942	1078	1108	3625	4173	1244	1097	702	10101	3596	1040	571	634	539	726	546	607	1066	1589	1287	640	1197	901	991	1152	675	340	634	1017	637	752	1325	1237	573	821	405	1438	828
MA0830.3	TCF4	8013	16762	27421	19054	4062	32311	39000	40947	47708	42461	8930	22090	10278	40853	29779	16052	9967	8397	101701	46221	16104	6142	11220	8464	11484	7664	11066	12272	21001	13304	6091	13545	8491	11615	12513	6091	6973	8730	9781	8195	6859	14313	11676	6156	11355	5548	16515	9874
MA0831.3	TFE3	2442	3869	11808	1750	750	4490	6880	6396	6626	4431	2410	3391	3782	6188	3719	1707	3353	1094	14808	7158	1954	698	1149	1294	1432	686	1342	1508	1358	1509	958	876	2036	635	1279	1592	1253	1507	821	1156	1617	1043	1037	802	1981	610	1000	812
MA0832.2	Tcf21	2046	4238	3409	2735	2314	5397	5864	6562	6300	6949	3713	1640	1194	6532	7287	2302	1160	1245	22092	6806	2522	856	1554	1265	1798	1477	1509	1913	2139	1799	1194	2114	2311	1776	2099	6691	760	1235	1601	1472	1676	2326	1809	891	1855	969	1998	1683
MA0833.3	ATF4	358	1195	1102	1726	328	862	984	925	851	906	508	542	538	1052	908	621	516	395	3149	1107	540	248	313	221	290	212	305	354	323	253	280	407	259	309	250	356	167	237	197	225	280	308	272	250	324	179	247	272
MA0834.2	ATF7	8155	645	1719	4872	380	737	2303	857	806	736	566	449	436	1707	480	483	393	274	2075	860	315	299	511	271	468	147	698	527	916	466	425	417	581	207	1564	1317	404	478	346	374	536	535	525	393	447	145	951	241
MA0835.3	BATF3	283	1190	1302	951	354	1965	1923	2248	1532	2446	225	295	818	1680	1300	552	232	467	4480	2148	412	347	288	267	368	296	293	508	541	449	273	473	317	352	527	237	200	249	318	306	272	461	465	297	437	161	468	328
MA0836.3	CEBPD	239	899	619	379	482	744	745	749	778	777	403	398	368	1105	668	748	388	303	2962	847	1131	288	340	191	320	290	310	588	261	261	243	222	250	246	309	198	160	242	198	199	225	235	222	297	291	202	280	237
MA0837.3	CEBPE	125	358	599	399	205	361	377	363	260	387	487	198	150	915	273	364	177	155	1382	382	286	94	146	101	93	52	150	125	102	113	113	87	88	82	83	59	108	94	61	88	71	78	95	108	92	94	106	69
MA0838.1	CEBPG	149	462	664	512	243	473	478	512	377	494	347	193	192	748	613	369	193	163	1636	536	319	155	1986	111	125	84	2059	190	136	140	138	97	119	93	119	129	105	143	94	107	99	114	120	154	111	107	124	90
MA0839.2	CREB3L1	776	2749	7535	1340	720	3500	7123	3902	3352	3649	872	1289	909	4649	3227	1256	908	1001	12298	4148	3325	1088	2824	1643	2357	1257	2880	2902	2471	1866	1145	1647	2043	1335	1883	1723	1795	1901	1266	1654	1688	1422	1639	1288	2583	1057	2264	1111
MA0840.2	Creb5	7827	606	1558	5664	445	576	1853	692	749	655	541	439	436	1706	462	514	369	301	2058	708	211	269	334	177	348	115	502	408	808	450	320	424	423	231	1557	1022	273	348	367	299	349	546	505	320	371	88	932	259
MA0841.2	NFE2	1031	2167	1799	1692	707	2547	3230	2795	2997	2820	567	648	550	2636	1953	1281	528	793	8957	2950	804	536	409	445	613	469	427	876	704	659	523	639	529	495	773	439	322	390	504	449	425	763	617	580	650	360	693	505
MA0842.3	NRL	321	1794	1590	1322	474	1279	1314	1358	1490	1324	252	594	307	1309	1199	698	313	368	3646	1370	498	319	371	293	421	314	370	531	960	465	363	394	394	420	413	438	213	296	378	317	333	425	416	316	416	239	451	350
MA0843.2	TEF	109	323	898	595	78	235	257	280	153	241	89	79	81	253	164	125	100	82	721	288	110	71	75	38	50	27	71	65	70	78	103	46	56	44	77	60	44	44	56	54	43	61	81	53	56	34	67	79
MA0844.2	XBP1	1356	1282	3274	854	391	1798	5067	2290	1394	1865	475	1005	497	2522	2039	1008	517	977	5149	2310	1058	630	1580	920	1372	950	1624	1606	3322	952	616	675	1011	581	1104	816	1157	1007	633	827	833	675	831	756	1420	584	1368	475
MA0845.1	FOXB1	191	607	1192	1677	454	322	382	442	350	331	133	107	171	392	280	415	129	193	1771	465	167	82	108	109	95	86	120	106	69	76	122	89	74	92	103	73	58	75	57	61	82	88	136	115	85	79	91	68
MA0846.2	FOXC2	203	1492	1125	1615	536	783	1000	1092	637	822	229	210	346	514	546	596	227	287	2503	1334	240	226	177	260	265	203	220	268	282	234	143	216	298	225	275	96	111	86	206	109	104	253	397	270	248	178	244	213
MA0847.4	FOXD2	214	1821	1162	527	386	748	929	807	815	827	274	260	338	648	811	587	300	348	3308	949	436	306	212	313	366	235	253	279	381	304	168	256	275	276	348	116	113	121	231	146	138	343	389	336	280	209	317	261
MA0848.1	FOXO4	2070	1240	1640	534	309	961	1023	893	921	1044	221	207	305	721	644	588	230	314	3814	893	314	232	190	207	243	214	199	281	260	237	243	222	813	200	256	331	226	199	178	240	359	235	287	227	333	140	280	162
MA0849.1	FOXO6	2070	1240	1640	534	309	961	1023	893	921	1044	221	207	305	721	644	588	230	314	3814	893	314	232	190	207	243	214	199	281	260	237	243	222	813	200	256	331	226	199	178	240	359	235	287	227	333	140	280	162
MA0850.1	FOXP3	2070	1240	1640	534	309	961	1023	893	921	1044	221	207	305	721	644	588	230	314	3814	893	314	232	190	207	243	214	199	281	260	237	243	222	813	200	256	331	226	199	178	240	359	235	287	227	333	140	280	162
MA0851.2	Foxj3	2055	1459	1456	833	607	584	857	730	717	722	227	208	287	644	524	630	262	268	2860	785	271	188	186	177	216	204	194	246	255	252	222	175	384	186	261	103	133	136	163	118	136	225	311	187	293	144	247	172
MA0852.3	FOXK1	2070	1240	1640	534	309	961	1023	893	921	1044	221	207	305	721	644	588	230	314	3814	893	314	232	190	207	243	214	199	281	260	237	243	222	813	200	256	331	226	199	178	240	359	235	287	227	333	140	280	162
MA0853.2	Alx4	358	611	4700	863	213	589	839	721	1200	542	477	505	632	605	579	509	602	245	2346	729	209	169	385	131	223	119	595	450	549	259	1773	336	894	399	286	493	150	226	264	201	600	604	369	253	266	89	1103	292
MA0854.2	Alx1	204	310	4398	418	100	304	382	440	860	316	472	554	642	294	328	252	622	148	1012	384	144	138	294	92	176	78	484	326	434	162	1458	236	686	348	230	362	98	164	230	150	420	534	306	190	196	60	918	230
MA0855.1	RXRB	7721	12455	24419	10997	4671	27793	30546	31396	25104	33248	6789	12162	8368	24386	22155	9914	8055	6034	77636	33383	7339	4430	5204	3649	5362	4288	5350	7159	8956	7850	6218	6313	7284	5349	8067	5051	2667	4514	4684	3836	5486	7097	5850	5389	7337	3623	10862	4779
MA0856.1	RXRG	7167	11179	22917	10390	4235	26532	29398	29764	23367	31244	6308	11546	7401	22531	20798	9012	6977	5482	66523	31410	6544	4126	4727	3225	4834	3997	4830	6498	8236	6700	5985	6095	6982	4988	8321	4855	2466	4334	4449	3602	5143	6320	5381	4933	7164	3338	10017	4418
MA0857.1	Rarb	9888	9554	11057	5501	2810	14744	18364	17089	12792	17148	3629	7654	4608	13415	22467	4291	4563	3200	43493	18622	4484	3616	3310	2235	3033	2118	3586	4793	6017	4571	5214	4113	5303	3620	4845	4171	2037	3962	2802	2470	4309	4625	3429	3881	3374	2289	5668	3143
MA0858.1	Rarb	2250	2874	11738	3682	1404	8305	8625	9516	7223	8979	2077	4206	2532	8750	8412	2779	2519	1917	26513	9879	2832	1852	3044	1463	2190	1615	3063	3573	6377	4211	5561	4196	6460	2993	4883	4871	1272	2953	2599	2136	6103	4299	3420	2516	2834	1274	7195	2428
MA0859.2	Rarg	12183	13174	17353	14231	3890	20609	25843	24033	19459	24502	4575	9010	6950	18784	36410	6110	6746	4171	60153	26422	6606	4561	4984	3110	4399	2969	5193	7060	8358	6667	8794	5644	8825	4865	6861	6286	2671	5059	3756	3476	6942	6190	4809	5420	5095	2999	9830	4212
MA0860.1	Rarg	6537	7127	12472	7929	2651	14617	14264	15452	10967	16794	2985	4478	3915	11536	16839	5897	3521	3025	46536	16912	5418	4422	4177	2786	4627	3157	4710	6842	11878	7732	7980	6629	9335	4885	7201	6176	3328	4138	4743	2916	8095	6701	5504	7182	5061	2197	14219	4133
MA0861.2	TP73	509	1204	2058	1368	427	2475	2886	2602	3402	2439	884	1223	1630	2828	2334	820	835	697	10717	2885	1631	856	830	924	1240	697	885	1569	1365	1168	572	987	935	813	1190	880	1223	963	764	710	985	975	905	1193	1430	749	1452	695
MA0862.1	GMEB2	162	255	226	186	139	177	127	145	86	95	41	28	39	168	109	71	41	39	463	170	39	25	62	31	53	22	45	55	25	29	41	16	27	7	18	50	39	23	15	27	39	60	26	27	54	29	24	11
MA0863.1	MTF1	1090	3506	4856	2069	690	6554	7799	7712	5029	7237	1367	1593	1827	8047	4241	7134	1864	1446	18681	8254	3018	1999	2354	2245	2432	1418	2362	2165	2414	2473	1556	1988	2228	1518	2323	1465	2265	1984	1685	1924	1664	2083	1958	1985	2340	1223	2457	1447
MA0864.3	E2F2	792	1155	1478	1961	736	1582	2573	1767	688	2009	391	571	572	2283	998	1236	479	491	3847	1834	1056	398	337	348	259	144	374	382	326	280	341	283	385	201	167	236	493	223	159	289	362	176	272	281	345	179	420	184
MA0865.3	E2F8	4860	14485	23722	10810	8969	27496	49436	40174	17730	30491	8790	9783	13507	30603	27839	18240	14243	12184	71017	50849	19199	7712	7295	10217	16235	5801	7909	10859	11844	11179	4801	6054	7949	3966	9126	3676	10314	6311	6463	6804	5863	6038	9141	9243	13059	5384	11014	4190
MA0866.1	SOX21	324	1099	862	1146	393	1431	1405	1717	1522	1695	358	267	270	1345	831	604	313	432	3288	1653	458	260	243	179	262	230	259	333	822	314	226	403	252	329	481	344	151	219	295	185	226	413	343	277	266	152	373	364
MA0867.3	SOX4	1294	4341	6044	2511	1730	5114	6490	5821	3948	5076	1609	1535	1689	6015	3583	2758	1794	2027	22394	6391	2425	1575	1410	908	1365	986	1483	1898	2755	2295	1387	1805	1493	1745	1889	1256	759	1701	1501	1213	1528	1975	1809	1581	1791	892	2280	1743
MA0868.3	SOX8	475	1492	2869	2226	515	1324	1512	1469	1089	1423	472	509	443	1510	1083	972	464	1258	6114	1552	700	289	340	196	288	197	332	332	687	344	507	400	380	354	608	355	139	399	328	278	471	406	341	294	245	182	523	431
MA0869.3	Sox11	1495	5190	6114	2199	2035	5410	6084	6333	4462	5313	1678	1488	1805	6365	3874	2624	1917	1998	17623	6914	2330	1777	1848	1120	1700	1189	2024	2422	3253	2371	1532	2187	1853	2177	2657	1434	1108	1863	1854	1617	1775	2418	2299	1895	2014	1041	2641	2078
MA0870.1	Sox1	500	1344	2028	2227	489	2193	2408	2401	2590	2509	382	616	381	3031	1722	924	429	547	6761	2746	680	404	317	225	387	321	355	599	1174	538	562	611	540	628	732	398	233	467	445	364	472	783	591	458	398	254	884	701
MA0871.3	TFEC	1605	4862	14609	2255	1167	3949	5358	5163	4536	3807	1593	2660	2499	6205	3288	1614	2222	1153	17616	5439	2853	930	1722	1767	1853	1000	1949	1816	1760	1747	1166	1131	2367	906	1648	2066	2023	2208	1103	1555	1954	1363	1392	1015	2481	854	1338	918
MA0872.1	TFAP2A	43697	80376	81844	97651	24045	112301	170754	146938	89484	149731	25832	34590	43215	129212	142806	41617	36368	27881	367765	182427	60056	52418	64742	50218	73201	28389	74093	67560	81624	66851	26714	39853	40733	29000	59444	20243	45727	32450	38773	35527	29787	42992	54378	43703	65790	21753	64893	26323
MA0873.2	HOXD12	230	925	894	207	72	213	309	363	188	210	147	179	219	325	302	143	209	82	942	393	106	58	106	65	92	30	111	106	105	64	184	75	338	56	107	212	42	57	48	103	207	101	77	54	94	51	83	52
MA0874.2	Arx	292	392	3500	629	132	433	618	560	1046	446	353	400	458	435	422	313	434	229	1562	536	136	123	354	105	165	89	546	352	476	205	1442	281	785	350	254	446	126	210	242	185	522	565	339	209	210	60	932	256
MA0875.2	BARX1	0	0	0	0	0	0	0	0	0	0	0	0	0	0	0	0	0	0	0	0	0	0	0	0	0	0	0	0	0	0	0	0	0	0	0	0	0	0	0	0	0	0	0	0	0	0	0	0
MA0876.2	BSX	0	0	0	0	0	0	0	0	0	0	0	0	0	0	0	0	0	0	0	0	0	0	0	0	0	0	0	0	0	0	0	0	0	0	0	0	0	0	0	0	0	0	0	0	0	0	0	0
MA0877.4	BARHL1	0	0	0	0	0	0	0	0	0	0	0	0	0	0	0	0	0	0	0	0	0	0	0	0	0	0	0	0	0	0	0	0	0	0	0	0	0	0	0	0	0	0	0	0	0	0	0	0
MA0878.3	CDX1	741	1687	2447	1845	359	1125	2500	2004	858	988	417	555	695	1073	1023	892	560	364	2649	2366	420	238	375	234	338	208	398	415	352	361	600	309	373	380	461	228	199	214	273	215	322	385	321	303	313	220	437	331
MA0879.3	DLX1	0	0	0	0	0	0	0	0	0	0	0	0	0	0	0	0	0	0	0	0	0	0	0	0	0	0	0	0	0	0	0	0	0	0	0	0	0	0	0	0	0	0	0	0	0	0	0	0
MA0880.2	Dlx3	0	0	0	0	0	0	0	0	0	0	0	0	0	0	0	0	0	0	0	0	0	0	0	0	0	0	0	0	0	0	0	0	0	0	0	0	0	0	0	0	0	0	0	0	0	0	0	0
MA0881.2	Dlx4	0	0	0	0	0	0	0	0	0	0	0	0	0	0	0	0	0	0	0	0	0	0	0	0	0	0	0	0	0	0	0	0	0	0	0	0	0	0	0	0	0	0	0	0	0	0	0	0
MA0882.2	DLX6	0	0	0	0	0	0	0	0	0	0	0	0	0	0	0	0	0	0	0	0	0	0	0	0	0	0	0	0	0	0	0	0	0	0	0	0	0	0	0	0	0	0	0	0	0	0	0	0
MA0883.2	Dmbx1	672	1891	5020	1619	492	1999	2211	2024	1400	2456	737	700	772	2407	1970	1771	737	645	6278	2082	643	437	559	396	616	471	584	575	866	681	1164	752	757	617	725	702	327	619	495	361	951	733	553	447	1137	791	874	696
MA0884.2	DUXA	2657	395	934	221	146	307	365	405	347	372	181	322	193	532	268	255	157	111	1847	383	99	44	42	58	58	60	65	74	95	39	134	74	40	108	77	38	28	44	48	24	56	74	62	47	55	61	144	57
MA0885.3	Dlx2	195	542	3030	1960	202	689	749	1544	4126	732	356	329	326	664	550	364	326	262	2054	2098	323	134	289	299	241	158	299	281	191	194	560	165	470	164	495	296	124	165	136	181	434	233	163	132	204	140	220	128
MA0886.2	EMX2	0	0	0	0	0	0	0	0	0	0	0	0	0	0	0	0	0	0	0	0	0	0	0	0	0	0	0	0	0	0	0	0	0	0	0	0	0	0	0	0	0	0	0	0	0	0	0	0
MA0887.2	EVX1	0	0	0	0	0	0	0	0	0	0	0	0	0	0	0	0	0	0	0	0	0	0	0	0	0	0	0	0	0	0	0	0	0	0	0	0	0	0	0	0	0	0	0	0	0	0	0	0
MA0888.2	EVX2	0	0	0	0	0	0	0	0	0	0	0	0	0	0	0	0	0	0	0	0	0	0	0	0	0	0	0	0	0	0	0	0	0	0	0	0	0	0	0	0	0	0	0	0	0	0	0	0
MA0889.2	GBX1	806	2108	2832	2079	626	1836	3562	2251	1269	2471	938	1384	1103	3305	1401	1235	1107	657	5806	7158	713	326	427	275	413	239	458	469	631	449	1337	454	774	416	1071	455	223	274	305	260	597	636	430	368	349	266	929	433
MA0890.2	GBX2	0	0	0	0	0	0	0	0	0	0	0	0	0	0	0	0	0	0	0	0	0	0	0	0	0	0	0	0	0	0	0	0	0	0	0	0	0	0	0	0	0	0	0	0	0	0	0	0
MA0891.2	GSC2	0	0	0	0	0	0	0	0	0	0	0	0	0	0	0	0	0	0	0	0	0	0	0	0	0	0	0	0	0	0	0	0	0	0	0	0	0	0	0	0	0	0	0	0	0	0	0	0
MA0892.2	GSX1	0	0	0	0	0	0	0	0	0	0	0	0	0	0	0	0	0	0	0	0	0	0	0	0	0	0	0	0	0	0	0	0	0	0	0	0	0	0	0	0	0	0	0	0	0	0	0	0
MA0893.3	GSX2	378	479	1579	1553	150	508	517	1042	435	765	181	154	170	380	366	193	164	162	1885	1413	179	109	220	134	161	106	262	301	247	239	643	181	438	140	161	301	91	147	146	138	351	217	164	161	206	94	350	102
MA0894.2	HESX1	0	0	0	0	0	0	0	0	0	0	0	0	0	0	0	0	0	0	0	0	0	0	0	0	0	0	0	0	0	0	0	0	0	0	0	0	0	0	0	0	0	0	0	0	0	0	0	0
MA0895.2	HMBOX1	124	430	797	641	119	325	878	471	305	346	165	172	198	310	343	197	216	185	1307	585	115	48	42	51	63	55	49	64	45	35	96	41	50	30	63	35	40	33	24	35	31	54	33	63	69	67	78	24
MA0896.2	Hmx1	259	531	4388	1289	128	574	692	660	602	586	312	302	331	587	502	372	334	229	2615	720	255	87	143	111	175	107	143	230	125	116	246	131	293	141	752	134	96	99	86	106	194	149	118	123	147	101	150	118
MA0897.2	Hmx2	194	448	1428	393	159	456	642	579	440	472	206	227	228	504	352	301	223	180	1995	608	212	84	124	94	143	95	119	130	151	124	251	106	153	140	465	124	76	80	85	88	179	132	110	95	120	79	176	108
MA0898.2	Hmx3	204	432	3767	1188	105	496	556	584	497	534	285	279	290	480	395	309	303	189	2120	625	224	74	126	105	163	98	130	177	107	98	200	95	131	123	722	106	74	88	74	93	167	116	101	99	123	78	123	105
MA0899.2	HOXA10	555	997	3089	899	254	611	790	1276	595	524	343	381	466	661	782	686	429	262	2492	1689	305	188	234	190	257	160	262	290	253	237	413	210	223	295	560	129	145	107	195	151	150	296	232	234	242	161	337	268
MA0900.3	HOXA2	0	0	0	0	0	0	0	0	0	0	0	0	0	0	0	0	0	0	0	0	0	0	0	0	0	0	0	0	0	0	0	0	0	0	0	0	0	0	0	0	0	0	0	0	0	0	0	0
MA0901.3	HOXB13	821	2811	7845	2641	998	1406	1895	1767	1308	1551	777	1372	1018	1780	1596	2998	859	1012	7915	1829	750	603	764	462	682	528	753	806	2029	1186	2614	896	1227	1002	892	999	291	495	704	375	2407	2141	1125	693	626	405	2140	1231
MA0902.3	HOXB2	0	0	0	0	0	0	0	0	0	0	0	0	0	0	0	0	0	0	0	0	0	0	0	0	0	0	0	0	0	0	0	0	0	0	0	0	0	0	0	0	0	0	0	0	0	0	0	0
MA0903.2	HOXB3	0	0	0	0	0	0	0	0	0	0	0	0	0	0	0	0	0	0	0	0	0	0	0	0	0	0	0	0	0	0	0	0	0	0	0	0	0	0	0	0	0	0	0	0	0	0	0	0
MA0904.3	HOXB5	0	0	0	0	0	0	0	0	0	0	0	0	0	0	0	0	0	0	0	0	0	0	0	0	0	0	0	0	0	0	0	0	0	0	0	0	0	0	0	0	0	0	0	0	0	0	0	0
MA0905.2	HOXC10	389	1082	924	249	105	257	1023	369	221	281	176	199	248	347	369	205	297	108	1307	402	121	60	118	67	86	41	112	130	179	76	200	70	139	62	133	142	41	53	78	51	153	102	83	85	129	61	112	63
MA0906.2	HOXC12	1925	1168	992	220	122	275	338	319	256	259	177	240	308	352	353	208	268	116	1143	352	130	68	114	68	101	48	106	114	129	75	190	73	116	68	136	122	43	48	55	43	140	97	86	78	106	63	110	59
MA0907.2	HOXC13	566	632	1549	352	201	511	679	727	429	527	191	207	213	542	502	581	243	274	2552	742	241	316	196	134	231	133	204	341	315	263	423	162	995	184	324	556	96	284	161	284	616	367	198	317	197	104	265	169
MA0908.2	HOXD11	211	1132	804	179	82	208	930	366	180	225	180	207	277	240	307	179	284	75	867	393	96	43	97	63	74	31	86	100	103	49	149	72	97	54	87	109	35	32	52	46	98	72	82	57	105	54	87	48
MA0909.4	Hoxd13	509	1501	5248	1596	426	880	1129	1160	796	1234	477	532	539	1000	1062	1734	543	451	4293	1243	435	442	371	275	424	304	378	492	990	507	727	521	342	649	406	278	215	244	357	233	295	1185	602	468	411	235	844	763
MA0910.3	HOXD8	359	922	1943	1583	323	1005	1208	1134	830	1282	414	319	383	963	862	522	387	313	3314	1190	391	244	260	188	246	215	259	327	326	243	539	196	324	159	594	236	149	198	174	185	376	221	248	300	298	164	230	166
MA0911.2	Hoxa11	172	337	934	193	84	195	316	364	126	227	137	158	200	225	304	173	227	77	1193	393	104	45	97	62	76	31	96	118	164	62	179	73	347	56	112	218	42	62	53	104	220	100	76	70	110	47	95	54
MA0912.2	HOXD3	330	478	1733	1105	186	527	682	1087	634	524	204	230	243	510	477	283	217	562	1761	1456	191	129	314	135	183	130	367	361	302	306	792	251	533	183	219	394	124	189	170	162	464	287	201	194	232	98	429	126
MA0913.3	HOXD9	427	963	2640	842	240	772	2061	1578	661	670	308	411	462	735	830	666	429	264	2335	1939	329	182	255	196	257	166	280	325	274	263	430	243	246	322	576	148	160	128	217	168	180	312	260	230	262	158	365	271
MA0914.2	ISL2	0	0	0	0	0	0	0	0	0	0	0	0	0	0	0	0	0	0	0	0	0	0	0	0	0	0	0	0	0	0	0	0	0	0	0	0	0	0	0	0	0	0	0	0	0	0	0	0
MA1099.3	HES1	1318	4742	8005	1894	1383	4598	6895	5804	4843	4563	1798	2396	2987	8353	3774	3584	2465	2313	15339	6266	5483	1639	3191	5403	3951	1315	3855	3076	3900	3667	1592	1728	3769	1107	2653	2217	7764	3516	1995	3124	3288	1945	2697	1963	3637	1818	3258	1155
MA1100.3	ASCL1	3637	16727	17087	19361	3166	30329	35991	40937	39201	36909	10152	6276	4849	51812	30178	9435	4823	6371	85683	44918	15216	7368	12544	9717	13475	9499	12728	12185	15135	13193	7733	13742	11760	11662	12674	8339	7798	10875	10928	9980	9597	12577	11807	7151	13861	6384	13607	10633
MA1101.3	BACH2	492	2842	2425	1074	655	3249	3523	3582	3674	3338	583	746	1221	3285	2501	1069	589	808	10346	3761	983	753	710	551	794	625	701	1050	997	900	555	879	730	658	926	686	457	647	687	691	580	860	829	698	930	488	948	710
MA1102.3	CTCFL	15615	24885	57471	37850	18563	95993	123574	133090	72454	112913	16862	22723	22108	103346	68090	37601	21395	19006	271145	143864	43508	17056	33144	25629	30761	15517	36315	29929	38968	33146	15481	21460	21042	16969	24825	12235	23790	18832	19684	19426	16145	22999	24743	18890	29049	13071	30353	15348
MA1103.3	FOXK2	2070	1240	1640	534	309	961	1023	893	921	1044	221	207	305	721	644	588	230	314	3814	893	314	232	190	207	243	214	199	281	260	237	243	222	813	200	256	331	226	199	178	240	359	235	287	227	333	140	280	162
MA1104.3	GATA6	384	1140	2705	1056	473	1552	1665	1569	1266	1611	616	555	681	1381	875	920	663	433	7043	1656	479	343	415	401	458	282	412	506	403	398	481	320	324	373	328	299	219	308	303	262	302	492	331	337	403	264	514	315
MA1105.3	GRHL2	636	2697	3238	1829	686	3808	4689	4627	3760	4090	8684	11478	11488	4739	3036	1573	10630	850	14714	5079	1622	819	1058	809	1135	997	1027	2039	1304	1637	631	1060	715	946	2610	684	646	777	914	629	656	1272	1074	955	1424	629	1394	953
MA1106.2	HIF1A	0	0	0	0	0	0	0	0	0	0	0	0	0	0	0	0	0	0	0	0	0	0	0	0	0	0	0	0	0	0	0	0	0	0	0	0	0	0	0	0	0	0	0	0	0	0	0	0
MA1107.3	KLF9	132455	348083	317606	220560	97503	378346	279849	243110	355849	433341	142642	164944	199577	366487	313815	196456	207441	108414	248649	292079	187340	69722	83534	63236	137275	69507	88095	110769	109345	96659	74862	75283	106494	53084	91029	55287	35489	64845	58272	67517	68129	73028	73748	76446	115377	53324	103113	46031
MA1108.3	MXI1	0	0	0	0	0	0	0	0	0	0	0	0	0	0	0	0	0	0	0	0	0	0	0	0	0	0	0	0	0	0	0	0	0	0	0	0	0	0	0	0	0	0	0	0	0	0	0	0
MA1109.2	NEUROD1	5643	9928	9031	9834	6239	14946	15518	16346	18214	17377	4174	5659	4868	18818	15565	26517	4285	3819	51869	17504	6836	3037	4074	3127	4588	3729	4007	6397	8021	6651	3363	6688	4671	5603	5423	5397	2239	3684	4575	3761	4083	6548	5176	3038	5003	2576	7544	5054
MA1110.3	Nr1H4	0	0	0	0	0	0	0	0	0	0	0	0	0	0	0	0	0	0	0	0	0	0	0	0	0	0	0	0	0	0	0	0	0	0	0	0	0	0	0	0	0	0	0	0	0	0	0	0
MA1111.2	NR2F2	1090	2042	2138	833	992	1559	1884	1860	4370	1712	921	1775	1051	1738	1675	1154	948	1192	5280	1923	959	502	535	433	654	477	489	1085	872	750	495	723	717	576	1496	553	322	521	578	443	658	875	813	466	680	364	894	587
MA1112.3	NR4A1	1996	9674	4024	2099	2677	4990	7012	5542	7392	5499	2456	3427	3012	6554	10318	2602	2734	2338	14982	6322	2955	1340	1480	1390	1710	1178	1460	2048	2034	1937	1145	1720	1767	1705	2059	1242	1123	1137	1492	1065	1295	2375	2008	1238	1629	1643	2333	1656
MA1113.3	PBX2	712	1443	3841	927	287	928	1053	966	926	954	406	325	349	809	3719	771	346	323	2769	1077	400	268	329	207	282	566	368	396	1087	422	849	557	842	475	437	444	140	283	402	218	708	674	450	259	486	169	1502	563
MA1114.2	PBX3	4031	7646	52431	12128	3260	20318	21331	20118	19715	23963	5878	4498	4904	23278	13581	6280	4400	4006	62431	21534	5914	8586	4632	3480	5725	8263	4685	8067	11628	8355	2807	8533	3748	7147	9716	3219	3034	3549	5982	3043	3219	8564	7304	5259	11424	2815	9808	6442
MA1115.2	POU5F1	291	1367	1311	653	493	1206	1425	1379	1383	1131	580	534	540	1523	875	1184	550	636	5292	1440	966	448	421	415	685	413	407	529	405	421	453	429	432	408	429	316	316	456	363	349	382	597	404	459	561	323	533	384
MA1116.2	RBPJ	0	0	0	0	0	0	0	0	0	0	0	0	0	0	0	0	0	0	0	0	0	0	0	0	0	0	0	0	0	0	0	0	0	0	0	0	0	0	0	0	0	0	0	0	0	0	0	0
MA1117.2	RELB	16735	61956	32617	41237	10623	32323	38860	37916	26566	36739	16984	11670	18007	32822	31463	19979	15310	15140	151177	40934	13235	7600	12175	6547	13844	5955	11674	9325	22108	12571	9040	12975	9932	12144	14419	7112	5459	5807	8566	5331	7419	18332	12023	8522	7741	5338	25235	11129
MA1118.2	SIX1	693	1648	3516	1116	458	2058	3485	2294	1620	1995	720	981	824	2496	1624	971	846	604	6901	2417	736	444	491	372	526	411	516	625	1115	667	546	749	546	571	1058	377	262	405	501	392	514	733	553	400	652	327	1153	606
MA1119.2	SIX2	628	1553	2993	953	482	2706	5846	3400	1787	2912	558	500	1010	2703	1592	1005	762	672	5510	3744	759	373	473	383	506	427	496	648	1114	909	497	765	403	656	780	356	293	469	551	382	395	907	693	352	637	339	1277	811
MA1120.2	SOX13	1227	3840	5332	4221	1180	3640	4270	3951	2961	3874	1167	1279	1082	3878	7904	2114	1094	1375	25461	4239	1495	1568	935	397	805	599	1033	1407	2573	1500	3038	1521	3311	1599	2153	2457	803	2944	939	981	3138	1661	1175	1511	938	423	2455	1567
MA1121.2	TEAD2	1397	4615	4651	20799	1805	5935	6413	6778	3998	7510	1717	1926	1766	6465	4886	2702	1694	3118	18709	7197	3130	1220	1014	807	1149	990	983	1508	3093	2596	1013	2675	1216	2465	3072	1040	1493	903	2309	884	946	3208	2594	1230	1220	619	3339	2542
MA1122.2	TFDP1	5386	13992	44396	15081	14837	47145	86134	71146	25767	53230	13648	15756	20227	50499	39876	26766	19318	17449	127912	81078	27459	15975	14953	20503	32613	9845	17899	20377	33759	26144	11230	14490	18075	8577	18725	7627	23170	14497	16702	16081	14430	14141	23159	19703	25179	8683	27701	9521
MA1123.3	TWIST1	4409	8879	12457	4202	4172	10222	11946	11913	13452	12735	2927	3567	3746	14203	9541	27923	3355	2924	34836	12838	5275	2181	3027	2254	3535	2824	3038	5010	6242	3994	2288	5184	3006	4341	3980	4277	1653	2640	3599	2478	2821	5253	3855	2237	3866	1909	6182	3876
MA1124.1	ZNF24	1142	2297	9606	7017	1330	4247	4321	4266	2787	4957	1716	2419	1909	3771	2460	2009	1881	1187	13289	4165	1577	1195	775	626	2526	666	762	1116	1390	1046	1318	1142	1271	1040	1033	844	492	714	925	687	903	1172	936	951	969	630	1148	958
MA1125.2	ZNF384	3124	85449	25698	3364	9719	6851	18768	9981	9664	6901	11406	3896	9726	11883	6889	17464	9517	4453	34543	12668	4088	4969	6267	7204	11554	6210	6863	8456	11883	6045	2683	9173	3281	5271	6799	2306	3117	2964	3997	1995	3144	8499	7848	8418	5754	6012	12781	4326
MA1126.2	FOS::JUN	8122	815	1811	3740	432	1051	2354	1216	971	1014	517	533	493	1953	736	560	432	353	2751	1252	440	371	552	322	499	204	720	660	950	541	510	484	715	299	1161	1421	430	526	395	444	639	646	586	469	515	167	963	308
MA1127.1	FOSB::JUN	6204	726	1950	3691	429	874	2188	983	921	870	578	468	475	1705	590	553	406	441	2273	1068	398	334	613	295	514	177	738	588	909	550	435	450	583	268	1928	1169	393	448	388	387	551	559	562	414	463	160	997	272
MA1128.2	FOSL1::JUN	312	1577	1364	1634	404	1501	1739	1744	1151	1553	230	697	278	1477	1051	543	262	454	3982	1860	412	284	286	272	389	258	299	490	469	403	251	420	345	302	488	236	222	313	334	309	255	404	418	292	426	189	446	335
MA1129.1	FOSL1::JUN	9808	670	1758	4899	389	810	1951	961	835	843	557	437	400	1597	500	499	359	247	2455	913	314	287	477	225	365	122	653	480	870	436	434	387	653	209	1541	1325	300	392	323	341	491	532	515	366	388	110	921	239
MA1130.2	FOSL2::JUN	314	1651	1379	1420	410	1589	1878	1833	1371	1632	244	337	295	1615	1157	580	280	495	4671	1943	439	311	316	290	420	286	333	550	527	428	286	467	382	330	542	270	238	327	363	343	270	457	468	324	473	202	468	367
MA1131.2	FOSL2::JUN	12239	829	2019	5712	523	1057	2187	1168	1078	1119	640	615	513	1870	665	642	459	468	2930	1117	397	363	488	253	455	194	660	568	1065	597	472	595	685	359	1806	1343	325	498	488	411	577	752	669	411	474	147	1149	374
MA1132.2	JUN::JUNB	398	1306	1598	1097	371	1915	2450	2249	1699	2078	289	719	899	1942	1338	666	310	512	4641	2336	561	425	831	401	525	363	476	639	614	634	336	526	448	402	567	341	349	411	393	457	372	513	518	398	618	250	532	378
MA1133.2	JUN::JUNB	6044	768	1991	3665	536	1070	2450	1147	1014	1120	511	463	431	1866	814	942	407	588	3102	1215	442	382	562	313	550	241	757	663	1090	654	479	567	688	372	1566	1356	412	546	493	467	614	792	695	445	548	210	1119	355
MA1134.2	FOS::JUNB	329	1909	1650	895	487	2028	2398	2268	1627	2112	286	321	341	1977	1408	650	302	630	5616	2433	485	364	377	340	499	364	382	638	668	527	339	596	417	414	731	321	282	350	423	395	308	563	576	379	539	226	613	447
MA1135.2	FOSB::JUNB	319	1665	1589	1211	407	1920	2267	2133	1565	2006	263	300	314	1899	1391	627	286	594	5274	2293	452	359	367	328	480	350	365	619	633	516	342	576	401	393	700	312	266	330	411	373	284	536	547	375	522	219	571	422
MA1136.1	FOSB::JUNB	7978	701	1926	4934	387	827	2389	925	855	825	570	420	410	1657	493	542	365	286	2316	943	355	309	539	249	446	143	719	538	965	457	423	411	604	209	1574	1316	336	444	344	369	555	539	526	396	410	143	950	238
MA1137.2	FOSL1::JUNB	310	1625	1266	732	345	1648	1990	1850	1383	1700	241	299	290	1659	1185	572	267	485	4574	1972	425	312	321	291	415	287	331	527	539	440	289	487	347	329	542	263	238	302	346	341	241	445	469	315	451	196	486	354
MA1138.2	FOSL2::JUNB	281	1657	1275	1530	442	1698	2063	1909	1419	1759	254	328	291	1663	1222	588	278	506	4911	2048	437	326	317	285	409	299	325	560	560	441	301	507	375	348	559	275	246	310	368	332	266	477	485	329	455	213	516	373
MA1139.2	FOSL2::JUNB	11091	726	1746	5467	398	842	2040	964	852	845	577	484	460	1632	512	543	419	284	2539	897	312	283	365	221	399	133	571	473	872	441	391	394	567	226	1556	1213	290	395	365	346	509	544	516	372	410	114	929	261
MA1140.3	JUNB	5613	692	2054	2544	434	836	2359	914	613	739	314	384	384	1720	607	561	339	363	2389	896	469	366	737	415	651	219	915	688	915	632	455	484	732	307	984	1357	584	597	420	476	693	562	622	446	583	296	974	275
MA1141.2	FOS::JUND	321	1593	1332	1627	405	1760	1730	1911	1156	2192	228	351	272	1475	1062	518	258	455	4002	1973	404	280	279	265	374	260	292	495	464	387	256	413	335	302	491	237	210	312	331	300	251	405	419	296	418	187	446	329
MA1142.2	FOSL1::JUND	234	1473	1014	729	285	1435	1363	1547	931	1857	183	588	210	1198	860	441	185	315	3309	1551	343	233	221	204	289	194	231	377	368	309	205	327	244	221	317	183	176	205	256	227	176	302	316	229	316	127	319	252
MA1143.2	FOSL1::JUND	2834	433	1109	1455	301	394	1316	537	361	400	181	184	250	870	1875	302	261	264	1057	451	213	193	340	157	271	96	454	252	428	281	203	245	333	119	789	829	218	222	212	198	255	258	306	215	247	96	503	83
MA1144.2	FOSL2::JUND	308	1684	1423	877	445	1911	2288	2153	1588	1994	278	305	332	1880	1339	624	293	602	5408	2317	462	348	358	324	468	348	357	619	633	505	324	578	400	391	713	306	268	326	412	377	288	537	535	372	519	221	593	426
MA1145.2	FOSL2::JUND	11518	800	2038	5668	496	1020	2463	1205	1009	1032	669	650	577	1932	628	634	512	334	2765	1205	406	366	469	243	446	167	672	566	1024	573	452	518	694	334	1634	1362	321	497	437	412	599	790	630	409	463	129	1078	350
MA1146.2	NR1H4::RXRA	1415	4582	8627	4570	2520	7185	10286	8480	7222	12303	1038	1782	1202	9824	10577	2497	1058	1377	23946	8937	2469	1698	1860	1559	2518	1380	1853	2709	2806	3320	1708	2287	2047	1941	2907	1468	1248	2431	1702	1663	1861	2192	2398	1631	2354	1030	3244	1563
MA1147.2	NR4A2::RXRA	2604	8425	13469	7314	3280	9952	13641	11821	9778	15254	1523	2787	1726	12828	13734	4048	1634	1859	32765	12346	3528	2380	2875	2347	3873	2054	2991	4314	3970	4660	2379	3242	2903	2623	3949	2038	1905	3134	2429	2302	2584	3125	3491	2413	3948	1409	4722	2060
MA1148.2	PPARA::RXRA	6231	17172	21556	14179	6498	30144	39392	33255	29929	34742	8101	9741	10772	32442	28472	11102	9904	7249	89270	35652	9330	5134	6148	4596	6517	4933	6139	7621	9160	7930	7563	6813	7941	5914	14102	5508	3379	5268	4929	4461	6357	8143	6164	5944	7115	4087	10901	5352
MA1149.2	RARA::RXRG	14746	26625	76950	46247	14367	77909	105937	100036	59248	92238	15506	25298	22149	72017	59256	25699	20297	18310	208035	110189	25411	15881	22677	14743	24196	13257	24549	38616	34249	29065	28759	22542	39520	17736	27443	21169	12326	19680	16414	16638	28591	23749	21567	20643	24136	10140	38817	15087
MA1150.2	RORB	1532	12916	4205	2693	1108	4704	4986	5247	3838	5578	1657	1910	1918	5022	3626	1669	1894	1178	19629	5260	2349	1068	1444	692	1001	642	1487	1441	2827	1445	8254	1461	6966	1325	3158	5628	672	2215	953	1203	7332	2036	1307	1341	1213	584	3707	1217
MA1151.2	RORC	1482	9139	5342	5502	1854	9869	40637	11218	6255	11728	2206	2755	2629	11412	5457	3020	2583	1620	23719	12058	2581	1407	1738	1226	1768	1331	1846	2652	3062	2011	5676	2370	4426	2107	3883	3234	1117	2183	1484	1532	4358	2621	2031	1884	1819	1108	4824	1774
MA1152.2	SOX15	0	0	0	0	0	0	0	0	0	0	0	0	0	0	0	0	0	0	0	0	0	0	0	0	0	0	0	0	0	0	0	0	0	0	0	0	0	0	0	0	0	0	0	0	0	0	0	0
MA1153.2	Smad4	577	1280	953	631	262	1218	1202	1561	1099	1442	228	198	334	1442	896	406	330	217	2821	1390	301	111	113	160	170	150	108	176	128	150	106	138	75	125	153	79	128	78	77	71	73	140	144	146	320	136	125	104
MA1154.2	ZNF282	5246	15410	28587	41661	5848	25273	30313	25992	19638	29501	6380	7445	7863	25392	16426	11216	7367	5542	82120	27014	7578	5378	5589	4752	6249	4488	6295	7888	10499	8166	5413	8449	5938	6646	9466	5388	4067	5197	5654	3977	5073	8329	6736	5565	7081	4061	10501	6089
MA1155.1	ZSCAN4	2487	17298	11999	3879	2476	7332	11288	9622	9226	9021	2301	2456	2706	7854	5583	2880	2499	1734	25176	10551	3372	1461	1835	1560	2304	2025	1906	3412	2445	2225	1283	2389	1334	1781	2108	1062	1129	1343	1552	1108	1258	1981	1767	1778	2936	1295	2983	1720
MA1418.2	IRF3	1136	6469	9231	3419	4118	5601	5753	5897	6205	5921	6874	4723	8267	7823	4292	4652	8046	3847	21848	6100	3847	3359	4108	2658	3177	2961	4236	3830	5844	5016	4411	11575	4980	4604	5306	2742	2708	3608	3488	2572	3904	5267	3346	3713	2548	2486	7063	4015
MA1419.2	IRF4	360	1694	2483	415	311	1860	1911	1463	875	1763	434	373	438	962	727	647	498	449	4316	1561	487	789	413	378	870	488	402	641	1105	672	402	990	444	610	737	288	167	261	439	291	357	903	608	935	604	227	1145	691
MA1420.1	IRF5	1400	3173	8847	2148	1351	4634	5418	4542	1965	5078	1117	1314	1191	4130	2785	1587	1268	984	13095	4905	1307	3021	1574	1047	3723	1630	1606	2175	3558	2445	1288	2739	1728	1987	2975	1118	668	1093	1636	1000	1422	2909	2064	6300	2618	712	3897	1770
MA1421.1	TCF7L1	1789	2898	4888	6199	1271	2787	3323	3333	2853	3176	1698	1849	2153	3847	2182	2300	2470	1461	11030	3722	2065	893	989	859	1003	855	916	1335	1305	1124	974	1856	1198	1258	1522	983	717	2060	985	727	1084	1403	1051	955	1103	771	1622	1053
MA1463.2	ARGFX	218	280	3936	526	100	311	468	405	820	327	304	380	424	338	331	259	395	170	998	382	122	98	279	87	141	68	398	267	369	154	1134	221	522	285	207	315	91	148	180	143	365	423	247	176	156	62	755	194
MA1464.2	ARNT2	1918	4214	13134	1743	769	3636	5499	4724	4600	3804	1153	1573	1713	6619	3815	1482	1485	1229	17151	4986	2920	1056	2279	2127	2285	1265	2474	2608	2018	2097	1287	1509	2550	1252	2171	2104	2665	2469	1403	1901	2290	1720	1784	1244	2914	1029	1727	1135
MA1466.2	ATF6	701	1256	2804	692	366	1895	4876	2347	1755	2100	451	616	540	2894	1894	912	531	977	6552	2395	1112	586	1338	778	1247	669	1383	1414	1121	899	475	733	785	553	929	575	822	770	584	680	609	637	756	695	1223	481	1266	485
MA1467.3	Atoh1	3627	6762	5131	6138	1723	8502	9154	9199	9246	9431	2847	3411	3512	11466	7264	25847	2978	2500	28296	9646	4156	2188	2082	1748	2367	1812	2067	3705	2619	2349	2224	2358	3012	2173	2991	2088	1294	1975	1895	2096	2399	2303	2123	1968	2502	1477	2693	2059
MA1468.1	ATOH7	909	3117	2946	1490	739	2441	3300	2689	4193	2722	778	745	609	2681	2480	1442	687	908	9351	2858	1162	539	571	546	685	547	539	949	533	663	1074	448	1323	473	593	719	396	635	398	558	1178	540	556	692	836	436	513	471
MA1470.2	BACH2	3159	400	949	341	167	446	543	530	383	383	154	190	248	557	325	602	186	165	1385	493	183	137	226	117	163	88	246	257	222	142	200	167	248	99	364	374	126	188	104	174	291	180	163	151	163	94	341	81
MA1471.2	BARX2	178	543	912	411	152	450	444	527	440	507	153	132	162	619	385	328	146	149	1160	544	162	86	86	96	107	97	88	157	149	77	137	117	80	127	105	134	47	66	68	64	195	177	107	95	137	76	138	108
MA1472.3	Bhlha15	4960	16236	15064	11014	7964	37780	42530	45770	44412	44498	11972	8864	6982	55814	38640	11420	6618	6686	87760	48628	14334	6986	13102	9586	14536	11192	13014	15106	20352	15596	8428	18572	12758	15934	14930	13218	6934	11396	14112	10538	10444	18312	14918	7298	15446	7000	18426	14298
MA1473.2	CDX4	701	1638	2067	857	259	921	2845	1196	727	801	351	855	571	802	917	680	508	315	2343	1243	327	216	315	210	277	198	324	342	301	301	436	262	294	345	442	190	160	155	254	167	265	328	285	255	286	174	380	297
MA1474.2	CREB3L4	2197	2824	7225	1906	1945	4830	11200	6744	3748	4931	1645	2832	2265	8378	4619	2986	2079	1790	20321	6804	2960	1768	3361	2225	3303	1521	3716	3809	2843	2848	1989	1768	3349	1444	2310	2629	2651	3139	1799	2873	2924	1952	2382	2215	3506	1248	3636	1229
MA1475.2	CREB3L4	6494	618	2030	3018	461	721	2447	827	643	772	416	398	395	1640	592	1099	378	832	2143	813	433	363	663	396	632	243	840	647	834	589	421	445	680	282	1088	1258	559	515	423	476	631	577	631	437	611	256	944	270
MA1476.3	Dlx5	195	542	3030	1960	202	689	749	1544	4126	732	356	329	326	664	550	364	326	262	2054	2098	323	134	289	299	241	158	299	281	191	194	560	165	470	164	495	296	124	165	136	181	434	233	163	132	204	140	220	128
MA1478.2	DMRTA2	0	0	0	0	0	0	0	0	0	0	0	0	0	0	0	0	0	0	0	0	0	0	0	0	0	0	0	0	0	0	0	0	0	0	0	0	0	0	0	0	0	0	0	0	0	0	0	0
MA1479.2	DMRTC2	156	1205	1023	838	256	465	468	513	418	470	147	146	148	451	408	270	127	184	1703	567	205	142	80	62	165	116	74	143	105	141	123	78	85	95	390	102	47	95	89	73	99	220	99	107	97	59	128	97
MA1480.2	DPRX	340	1291	3275	1001	628	2585	2531	2520	2282	2644	701	762	637	2398	2653	1248	774	827	8586	2611	901	629	590	578	653	1127	629	1129	1599	1164	547	1593	485	1176	1252	467	541	480	1072	525	525	1282	1164	608	770	432	1433	1026
MA1481.2	DRGX	0	0	0	0	0	0	0	0	0	0	0	0	0	0	0	0	0	0	0	0	0	0	0	0	0	0	0	0	0	0	0	0	0	0	0	0	0	0	0	0	0	0	0	0	0	0	0	0
MA1483.3	ELF2	4925	2037	5628	1911	1425	4032	9510	5036	2930	3891	1564	1123	1621	4481	3961	1949	1663	1528	15960	5606	2558	1704	414	642	630	349	537	816	1748	922	1017	1089	914	467	1074	667	463	659	506	813	880	873	755	865	768	411	1175	396
MA1484.2	ETS2	3676	2195	8969	1526	1397	3242	5010	4071	2848	3177	1461	935	1533	4520	3207	1500	1248	1117	12045	4586	2298	824	480	729	656	315	588	905	1515	901	1201	572	993	414	989	643	524	740	540	858	1022	754	681	732	748	433	785	360
MA1485.1	FERD3L	4123	11239	11848	5661	1948	16102	21955	22623	21197	19970	3006	4685	3872	25474	19630	10289	5205	4627	59934	25337	7385	4564	7255	6188	8143	5105	7717	8821	15843	10755	4311	12098	6625	9683	7324	4747	5994	5777	9032	5616	5077	11837	9675	5252	12321	3568	15456	7989
MA1487.3	FOXE1	354	4810	2917	907	590	1416	2164	1821	1471	1521	464	416	592	1120	1352	1189	529	410	5399	2191	571	693	495	614	934	624	474	729	808	617	315	638	434	672	774	204	172	268	517	233	264	732	994	934	792	373	768	561
MA1489.1	FOXN3	1709	207	263	141	85	159	208	193	117	304	51	48	92	144	95	130	66	74	848	175	70	40	27	37	56	74	38	54	42	60	35	28	230	40	66	19	27	48	37	23	31	47	100	38	133	29	55	39
MA1491.3	GLI3	14785	46169	37578	28104	6977	36064	48733	43587	34448	41121	13233	19793	15710	35962	36183	16699	15491	11246	149734	48792	18980	9805	13210	8755	17422	7975	14409	18966	18720	15531	10986	9278	15506	8145	15456	9658	8048	9181	8954	9801	11739	11313	11784	10785	16316	5521	21382	6813
MA1493.1	HES6	1991	2211	7328	3074	794	5085	7460	6435	7924	7005	1437	2158	1564	6526	4581	2301	1680	1552	20392	7261	2860	1407	2929	2302	2898	1551	3167	3296	2588	2881	1349	2256	2138	1670	2883	1801	2699	2477	1879	1834	1912	2391	2373	1761	2704	1286	2913	1363
MA1494.2	HNF4A	3224	6317	7283	4003	3100	9806	11538	10808	11789	10790	3531	10855	6888	10686	8161	4725	6050	3036	32421	12093	4226	1813	2170	1841	2482	1712	2237	3097	3302	2921	2347	2184	2904	2256	3018	2142	1565	2011	1914	1740	2348	2883	2572	2465	2723	1489	5608	2015
MA1495.2	HOXA1	0	0	0	0	0	0	0	0	0	0	0	0	0	0	0	0	0	0	0	0	0	0	0	0	0	0	0	0	0	0	0	0	0	0	0	0	0	0	0	0	0	0	0	0	0	0	0	0
MA1496.2	HOXA4	390	517	2355	676	137	474	658	570	322	535	161	189	177	574	469	262	182	544	1573	609	197	125	187	99	156	108	193	231	186	169	806	133	758	107	171	455	93	159	103	120	502	146	114	159	138	95	250	102
MA1497.2	HOXA6	378	479	1579	1553	150	508	517	1042	435	765	181	154	170	380	366	193	164	162	1885	1413	179	109	220	134	161	106	262	301	247	239	643	181	438	140	161	301	91	147	146	138	351	217	164	161	206	94	350	102
MA1498.3	HOXA7	0	0	0	0	0	0	0	0	0	0	0	0	0	0	0	0	0	0	0	0	0	0	0	0	0	0	0	0	0	0	0	0	0	0	0	0	0	0	0	0	0	0	0	0	0	0	0	0
MA1499.2	HOXB4	0	0	0	0	0	0	0	0	0	0	0	0	0	0	0	0	0	0	0	0	0	0	0	0	0	0	0	0	0	0	0	0	0	0	0	0	0	0	0	0	0	0	0	0	0	0	0	0
MA1500.2	HOXB6	171	490	2868	1945	161	678	782	1590	4186	717	325	382	318	766	549	392	327	259	2301	2170	329	136	232	287	236	154	204	245	139	125	348	146	257	141	478	171	120	133	114	147	276	175	126	129	185	128	130	116
MA1501.2	HOXB7	378	479	1579	1553	150	508	517	1042	435	765	181	154	170	380	366	193	164	162	1885	1413	179	109	220	134	161	106	262	301	247	239	643	181	438	140	161	301	91	147	146	138	351	217	164	161	206	94	350	102
MA1502.2	HOXB8	171	490	2868	1945	161	678	782	1590	4186	717	325	382	318	766	549	392	327	259	2301	2170	329	136	232	287	236	154	204	245	139	125	348	146	257	141	478	171	120	133	114	147	276	175	126	129	185	128	130	116
MA1503.2	HOXB9	315	986	818	210	90	194	961	224	191	201	161	183	233	321	321	183	273	84	1124	262	106	54	90	57	70	29	89	122	164	62	174	66	119	56	112	125	38	43	54	50	128	97	73	71	117	56	105	55
MA1504.2	HOXC4	0	0	0	0	0	0	0	0	0	0	0	0	0	0	0	0	0	0	0	0	0	0	0	0	0	0	0	0	0	0	0	0	0	0	0	0	0	0	0	0	0	0	0	0	0	0	0	0
MA1505.2	HOXC8	0	0	0	0	0	0	0	0	0	0	0	0	0	0	0	0	0	0	0	0	0	0	0	0	0	0	0	0	0	0	0	0	0	0	0	0	0	0	0	0	0	0	0	0	0	0	0	0
MA1506.2	HOXD10	418	1117	902	247	110	279	1271	365	264	281	203	232	302	575	401	243	333	136	1240	372	163	73	125	72	99	52	124	142	147	91	263	104	245	83	179	258	54	59	76	63	194	123	98	90	127	72	151	79
MA1507.2	HOXD4	0	0	0	0	0	0	0	0	0	0	0	0	0	0	0	0	0	0	0	0	0	0	0	0	0	0	0	0	0	0	0	0	0	0	0	0	0	0	0	0	0	0	0	0	0	0	0	0
MA1508.2	IKZF1	2777	6371	52197	5175	2683	8717	11254	9356	8841	9860	3504	3340	4055	11258	8311	5113	4284	3869	25468	9912	6098	2856	2898	2033	2508	3095	3409	3950	4675	3277	2375	3899	2438	3037	4347	2147	1757	2329	2760	1996	2225	3813	3270	2597	4610	1731	4036	2954
MA1509.1	IRF6	1292	986	10278	999	444	2124	4221	2530	942	2736	639	1633	855	1706	1298	986	745	432	5102	2457	661	1004	659	778	1030	434	770	860	770	807	287	670	459	384	543	281	408	359	406	290	351	735	735	4100	834	412	1412	311
MA1511.2	KLF10	166721	466061	491176	239390	182261	273141	457970	392140	211146	305356	287243	349777	370971	277351	215631	377000	374443	242217	187054	433536	318340	160597	152576	125363	231678	127750	166558	203197	234106	196419	131854	132411	187216	108626	189805	106028	79987	124948	122495	130037	133286	146079	156232	142195	217928	100213	213506	95482
MA1512.2	KLF11	112779	282380	249029	142978	105699	383136	302041	263067	329898	432696	144482	172622	194992	410312	302165	227011	204871	129861	181112	296615	174703	68028	71464	60268	125436	62362	79998	92224	118431	96784	69889	58300	101321	45235	93373	51403	35925	62356	54743	66356	68476	65606	73080	73007	109848	51903	101453	39911
MA1513.2	KLF15	34973	66943	114630	61379	55833	168638	344872	264416	110958	191113	57895	72711	95151	205139	150103	132927	94770	103509	234243	302622	124127	57925	67470	74133	135446	30940	87349	69081	151754	115742	55044	49715	87763	26334	67310	30963	83141	66888	64201	78250	74496	50722	95987	80538	105912	29695	117918	35501
MA1514.2	KLF17	101354	235099	274357	139529	100996	288116	434691	392270	283755	329029	151575	173984	202838	312937	240715	162309	202547	119574	299609	440554	141630	75933	90223	67385	127044	64538	93556	115765	95761	94155	79730	68830	113632	57665	96016	62417	44437	65439	60191	66833	71401	72746	74260	82484	109210	57051	97983	50704
MA1515.2	KLF2	148347	320332	271449	163727	121265	143509	257529	205861	427940	159940	193884	236099	259484	489038	389239	299304	277594	169888	341543	228834	250562	88291	95258	80728	167355	85028	106955	126701	158036	134179	91511	84254	129341	64388	108480	66040	53159	85793	81963	91289	91019	93223	106769	97825	151490	65226	141040	57302
MA1516.2	KLF3	17054	33464	63413	34165	21698	83515	153955	123467	58134	103682	32321	42516	43807	94838	73800	37275	42926	33036	219594	141189	45006	20409	27735	20125	37200	18812	33724	23508	59754	42637	20741	23228	33859	14595	27637	17385	22697	27886	24724	29545	27358	23679	34573	26032	38228	8946	46644	15748
MA1517.2	KLF6	83824	193226	153152	98968	75034	314237	497244	425260	261539	351919	116415	147313	165109	310820	238637	182115	174699	104362	418724	470572	146717	44717	53742	43467	96969	49603	60190	70268	93016	75485	53607	48181	76049	37768	58835	41289	27210	48199	45055	50604	52307	53251	59767	54566	90241	37503	81109	32822
MA1518.3	Lhx1	466	482	1028	1484	170	696	980	764	910	612	314	304	324	770	794	406	304	224	2254	822	270	212	478	150	288	128	612	442	508	450	1174	342	892	332	344	546	188	272	310	264	648	594	366	242	326	112	738	242
MA1519.2	LHX5	378	479	1579	1553	150	508	517	1042	435	765	181	154	170	380	366	193	164	162	1885	1413	179	109	220	134	161	106	262	301	247	239	643	181	438	140	161	301	91	147	146	138	351	217	164	161	206	94	350	102
MA1520.2	MAF	407	1675	2886	1184	375	4120	5598	5551	4755	4678	701	956	946	4362	4401	1323	1131	858	8435	6157	1578	1252	1747	1201	1829	1256	1683	1704	2097	1626	1007	1595	2108	1554	1524	1243	914	1257	1473	1334	1285	1786	1556	1273	1763	852	1782	1389
MA1521.2	MAFA	535	1970	3579	1655	574	6393	8845	8430	6771	7504	1051	1310	1477	6325	6836	1775	1669	1250	13575	9520	2523	2036	2838	2223	3196	2172	2900	2673	3597	2807	1520	2446	2991	2287	2313	1702	1906	2075	2357	2184	1980	2696	2600	2232	2978	1243	3132	2119
MA1522.2	MAZ	108960	308827	452784	168650	161879	488321	319096	301333	382264	258299	175155	216989	240076	297209	371147	265058	238569	181077	0	327896	237307	115912	143858	123552	216055	100095	160670	184474	212138	173262	102885	118766	145906	88415	163438	83067	93035	109234	108792	111925	110761	122816	139537	126502	185489	85265	185804	82097
MA1523.2	MSANTD3	2305	3791	8251	10368	1802	9464	11491	10461	9871	11294	2876	6306	3210	8734	5732	3483	3153	1641	34890	10864	2494	2254	1700	1169	4290	1531	1766	2540	3147	2389	1787	2593	2196	1890	2565	1659	1174	1680	1982	1762	1779	2255	2211	2021	2560	907	2673	1806
MA1524.3	Msgn1	2893	7651	8533	4795	2576	6954	15080	7340	6863	7523	2216	2874	2561	7538	6135	23448	2230	2450	21795	8238	3913	1278	1796	1306	1721	1262	1876	2328	2307	1845	1984	1625	2626	1716	2003	1696	1032	1635	1339	1416	2643	1913	1680	1418	1833	1097	2284	1568
MA1525.3	NFATC4	779	12913	5188	812	1034	2326	6153	3197	2074	2477	1060	1125	1383	2260	1689	1881	1172	921	7596	4327	1358	638	786	708	836	616	798	1143	1870	969	594	1092	759	1046	3040	549	534	526	724	535	804	1437	1007	720	754	495	1821	956
MA1527.2	NFIC	2770	5716	10367	6829	2402	26223	27558	28776	22957	29623	3508	5809	4500	27355	33598	6869	4080	4060	51988	30784	8652	3944	6588	5386	6946	8988	6697	7999	9465	6525	2878	6445	3997	5441	8345	3060	4213	4157	5008	3975	3346	7053	5929	4263	12129	3276	6913	5337
MA1528.2	NFIX	6305	11289	23469	9232	4243	44205	48133	52979	34167	49616	4328	6800	6430	42157	46465	13905	5421	12791	98141	61092	15314	6948	12681	10649	12855	15390	13967	14253	16800	13947	5629	10354	8406	8157	12223	5665	8990	9137	8731	8621	7101	10873	10955	7722	22659	5411	12708	7561
MA1529.2	NHLH2	3417	11848	13850	14036	3521	25290	30033	33855	31557	28874	4360	12369	4699	33773	24307	10918	4654	5315	60591	36591	12225	6389	10203	8318	11693	8336	10424	11041	20614	14623	6452	16904	10145	13502	11746	10348	6967	8864	11708	8692	8095	15683	12980	6496	12499	4959	23243	11550
MA1530.2	NKX6-3	968	1817	6915	2268	600	1848	2214	2031	1224	2128	1120	1464	1125	1963	1706	1270	1110	697	8654	2233	791	574	789	405	585	462	755	775	1658	702	6271	865	2811	713	876	1053	366	665	533	478	1564	1032	728	935	711	343	1449	780
MA1531.2	NR1D1	16610	28639	50079	38015	7670	61281	71059	70637	52725	74411	17067	23386	20124	53403	56025	14789	18590	11254	160037	79443	16158	10061	15126	9490	15111	9754	15947	21040	19826	17440	22619	15350	25430	11775	21958	15105	8232	13837	10227	10880	16716	14612	12428	14085	16369	6891	21367	10347
MA1532.2	NR1D2	14567	28748	36995	67595	4240	43801	51024	49654	35799	53829	13374	17936	17006	33964	29219	8937	16128	6230	107290	55853	9211	6403	9446	5003	9105	5710	9899	12733	13900	11628	20751	10197	20637	7697	15661	12451	4342	9677	6407	7153	13970	9833	7874	9549	9747	4068	15274	6860
MA1533.2	NR1I2	12942	5797	17535	11357	3283	18774	21527	23662	13072	21484	2876	3964	4018	16492	12285	7537	4497	6080	46504	24513	6732	5351	5952	4837	6792	3212	6652	6965	9823	8361	8593	6006	11217	4397	8416	7193	5074	5799	4724	4788	9605	5636	6280	6593	6707	2738	13256	4128
MA1534.2	NR1I3	207	1141	627	363	281	811	877	1059	675	845	197	228	229	812	572	532	201	320	2308	1073	325	126	121	114	114	112	118	166	193	146	116	151	103	186	161	102	66	103	125	102	125	179	161	111	125	94	155	156
MA1535.2	NR2C1	0	0	0	0	0	0	0	0	0	0	0	0	0	0	0	0	0	0	0	0	0	0	0	0	0	0	0	0	0	0	0	0	0	0	0	0	0	0	0	0	0	0	0	0	0	0	0	0
MA1536.2	NR2C2	0	0	0	0	0	0	0	0	0	0	0	0	0	0	0	0	0	0	0	0	0	0	0	0	0	0	0	0	0	0	0	0	0	0	0	0	0	0	0	0	0	0	0	0	0	0	0	0
MA1537.2	NR2F1	9338	17609	33603	16231	7170	48851	52553	55903	48064	57568	10519	22038	12312	43653	46869	18590	12101	9924	110831	61618	14729	7280	9428	7300	10345	7765	9860	12518	13851	11999	10325	10557	11590	8913	14389	8280	5682	8193	8262	7039	8431	11477	9885	9235	12113	6370	15715	7838
MA1538.1	NR2F1	2196	10428	10422	8554	3268	10336	12078	12182	9346	16066	1545	3359	1557	14050	31412	3418	1763	1951	30840	13234	3262	7997	3776	2261	4188	2170	4017	4933	6327	4982	2795	4593	3563	3364	4145	2550	2069	3056	3109	2591	3026	4162	4189	2617	4282	1511	6614	2698
MA1539.1	NR2F6	2645	16601	14400	7385	3658	12100	15994	14672	11818	18141	2192	4139	1908	17335	34705	4556	2277	2427	37701	15903	4238	3779	3913	2796	4918	2669	4097	6066	6355	5910	3303	4746	5788	3604	4897	5120	2377	3541	3499	3737	5838	4654	4791	3050	4686	1733	7022	3005
MA1540.3	Nr5a1	2063	3499	4114	2061	1552	6049	8233	6591	5839	8072	2673	3548	3248	6467	7593	2512	3003	1581	17808	8952	2422	1169	1473	1163	1510	1336	1441	13760	2462	1904	1069	2198	1264	1801	3041	1115	1026	1329	1702	1099	1256	2437	1994	1350	1877	962	2610	1810
MA1541.2	NR6A1	1625	3157	5218	3641	1129	4908	5241	5251	6540	5214	2731	3970	3494	6450	5427	2428	3118	1943	17590	8445	2667	1498	1497	1282	1606	1896	1564	16135	2273	2247	1068	2034	1375	1718	2909	1056	1118	1422	1618	1051	1042	2213	1970	1374	1956	1028	2303	1547
MA1542.2	OSR1	732	2805	2988	9696	549	3786	5362	3717	4603	4863	850	729	983	5287	3085	1362	982	1009	10992	4285	1675	840	1038	818	1694	779	1075	1912	1364	1038	685	738	923	551	2951	773	641	671	626	730	681	817	742	915	1486	612	1029	513
MA1544.2	OVOL1	134	606	1813	351	100	376	469	392	170	369	119	140	113	292	272	148	117	92	1181	457	698	268	150	164	177	89	155	190	280	176	216	399	156	195	144	121	226	105	227	110	125	311	221	202	180	124	647	156
MA1545.2	OVOL2	126	566	671	208	79	261	403	250	534	283	61	244	122	168	202	105	119	54	682	278	69	79	97	145	131	54	101	128	40	48	91	40	98	50	47	59	188	71	35	71	61	74	46	78	131	72	51	24
MA1546.2	PAX3	294	424	1570	448	137	560	641	670	498	618	209	279	259	702	430	388	257	260	2927	676	474	181	262	164	321	169	286	348	452	300	323	250	254	221	264	338	176	330	193	190	313	262	309	211	303	100	568	116
MA1547.2	PITX2	2614	5492	17999	6016	1828	7300	8116	7660	4425	8479	1840	2031	2123	7610	4521	3949	2121	2013	18400	8176	2072	1240	1691	1317	1674	1179	1882	1823	2955	2956	3529	2291	2245	1934	2203	1754	1097	1429	1585	1078	2368	2434	1781	1378	2289	1508	2829	1945
MA1548.2	PLAGL2	53650	137472	145773	176687	31324	201982	294505	217905	119446	262559	26638	47858	42353	176647	216232	67137	40824	24416	254032	259397	84339	64205	58348	56776	65667	26503	66819	48107	65478	67009	28549	38020	41041	25203	60157	20649	51296	33008	32845	33381	29450	34284	44827	42520	65010	26697	50593	21722
MA1549.2	POU6F1	924	715	2342	1563	239	1081	1292	1169	867	1092	413	450	518	968	833	502	468	330	2893	1077	328	402	280	202	269	219	309	407	431	329	765	255	500	285	308	318	171	251	257	247	349	304	286	320	338	153	496	304
MA1550.2	PPARD	10729	20184	41747	17199	7729	43229	51308	49293	39743	50714	11669	18268	14840	41540	38233	16706	13905	9579	115850	52903	11891	7461	8823	6399	9305	6855	9190	11862	12900	11239	10115	9846	11936	8276	13689	7646	4622	7011	7401	6293	8383	10739	8833	9542	11949	5934	14971	7283
MA1552.2	RARB	2441	3947	12229	3329	1478	7073	10546	8982	8478	9094	1831	3249	1874	11634	7259	3075	1730	1477	25204	9598	3398	1658	2517	1681	2855	1494	2809	3029	3222	2738	1604	2339	1978	1813	3687	1362	1425	1954	1967	1704	1780	2209	2929	1925	2903	997	3698	1578
MA1553.2	RARG	1714	5506	5844	2759	2161	7780	10661	9842	7143	8773	1770	3684	1653	10089	6155	2655	1545	1125	22675	10716	2443	1327	1983	1343	2145	1249	2114	2612	2634	2090	1259	2020	1479	1650	2667	1159	1070	1437	1598	1315	1395	2003	2208	1480	2191	878	2942	1390
MA1554.2	RFX7	779	3005	2183	1486	1180	2547	3142	2572	2694	2567	876	2195	1058	3202	3031	2107	1077	1155	10376	2724	1474	753	853	876	974	858	890	1211	1118	758	763	515	1048	470	807	794	739	894	456	747	913	817	607	1021	1017	496	771	384
MA1555.1	RXRB	12450	10451	19703	4577	3299	14604	18200	18386	12928	19318	2146	4479	2290	19390	12503	4582	2222	2134	44972	20336	4231	2703	3992	2370	4338	2405	4431	5356	4737	4235	2649	3554	3163	2826	5678	2483	2034	3116	3003	2621	3137	3510	4132	3064	4573	1536	5543	2185
MA1556.1	RXRG	15106	7127	15935	4587	4653	17280	20733	22273	13169	21147	2516	3497	2898	18264	10859	5080	2455	2296	49957	24926	4576	8172	4881	2947	5417	2711	5419	6362	6220	5234	3331	4310	4607	3259	6015	3685	2645	4395	3645	3381	4070	4314	4910	3667	5448	1841	6751	2600
MA1557.1	SMAD5	448	1806	1862	274	284	1365	1728	1799	1316	1504	271	351	643	2565	1124	514	579	644	5679	1744	463	140	1095	257	355	195	1115	257	244	257	130	180	149	168	198	120	132	130	160	107	119	268	228	194	285	207	279	142
MA1558.2	SNAI1	4951	8214	22247	13426	4927	24460	26670	28690	35307	28827	6317	20270	7098	28441	24095	13610	7332	5928	91926	30864	11634	4157	7167	5499	7829	5531	7134	8260	12383	10872	4325	10321	5745	7874	9100	4425	4147	5880	7142	5616	4923	10626	8538	4306	8076	3661	11202	7312
MA1559.2	SNAI3	4570	6913	21403	12815	4553	22807	25021	27028	31542	27178	5829	19630	6462	26453	21087	12215	6756	5096	86044	29110	10738	3804	6483	4995	7038	5000	6389	7444	11418	9993	3968	9289	5317	7051	8204	4062	3757	5390	6446	5183	4508	9369	7657	3937	7244	3287	10135	6478
MA1560.2	SOHLH2	1647	4930	15589	2048	744	4180	5876	5745	5913	4523	1892	2703	2794	7112	4330	1695	2508	1455	18945	6072	4238	1193	2910	2887	2764	1562	3159	2651	1743	2436	1336	1578	2560	1379	2298	1692	3486	2616	1401	2231	1897	1748	1883	1459	2727	1345	1895	1187
MA1561.2	SOX12	574	1858	2489	1111	564	2119	2703	2948	1337	2458	672	654	696	2059	1767	1299	681	1255	7174	2954	985	629	634	429	808	644	683	1334	1455	1040	546	905	655	822	1714	458	298	514	848	493	509	1024	1279	639	904	352	1175	832
MA1562.2	SOX14	314	1253	1774	995	361	1388	1675	1816	977	1360	382	406	364	1430	1030	759	415	1173	4701	1871	581	259	339	174	245	160	336	275	596	328	417	370	369	303	580	310	127	447	329	308	437	367	346	229	233	156	466	360
MA1563.2	SOX18	2178	1917	2875	1438	472	1420	1553	1481	1095	1567	491	512	469	1519	1143	1307	488	1075	6213	1586	706	314	335	205	376	214	323	310	874	458	459	606	368	505	561	338	150	334	415	244	423	631	491	294	257	194	753	531
MA1564.2	SP9	490724	82867	80140	48881	495395	128317	242986	196772	458348	292085	432131	239301	71665	142177	111381	449350	77982	280868	408230	221772	488766	223505	246154	156602	62627	154134	256635	192558	173871	188662	175673	20548	303896	61113	123635	71288	69432	131709	73487	125989	162776	86960	103838	182229	315306	164315	155990	51512
MA1565.2	TBX18	9903	10247	20343	10002	5430	24677	29895	28276	23599	27639	7996	15176	8734	37804	17567	10920	9266	6790	77523	30505	9638	6384	6919	5657	8005	6023	6689	10564	10716	10058	5693	9724	8741	8219	11615	5638	4370	5115	7646	5377	5320	10340	8732	7189	8307	4848	10903	7695
MA1566.3	TBX3	8007	4650	12187	3331	2002	9964	13906	10925	9293	11735	2341	5201	2159	11210	6522	3549	2283	2180	23092	13062	3523	2160	2431	1748	2770	2176	2401	4439	3800	3303	2478	3436	2529	2576	3725	1970	1274	1680	2479	1729	1826	3168	2877	2666	3360	1709	3719	2455
MA1567.3	Tbx6	9732	11722	19299	10577	6429	24394	31404	28448	22634	27485	8231	11511	9456	28912	18240	12179	9502	6880	66586	32246	9829	6349	6463	5202	7642	5979	6287	11070	10927	10085	5826	9809	8698	8396	12429	5714	4113	4876	7619	5088	5277	10127	8940	7304	8203	4646	11605	7878
MA1568.2	TCF21	835	4652	2420	1365	821	2175	2323	2366	3328	2157	615	717	526	2918	2413	1464	605	736	8252	2611	926	414	442	469	572	451	440	706	445	666	825	368	834	416	430	520	385	472	368	462	837	638	455	523	770	337	930	464
MA1569.2	TFAP2E	37251	84640	176441	86986	28160	158917	227458	206282	114581	199018	23539	59387	32742	184503	136916	43525	34235	32937	356314	240683	78156	43205	78939	68705	94849	42556	91705	79891	90752	88117	28892	58670	49190	42955	76165	22689	59815	42913	58072	45118	34918	60606	75997	53300	86914	30333	93364	39752
MA1570.1	TFAP4	1002	2982	2798	937	1924	1390	1510	1564	1885	1288	426	474	420	1627	1483	826	390	613	6624	1564	666	299	356	315	376	268	303	507	341	516	548	263	411	368	405	291	239	296	284	289	453	709	334	397	521	226	350	361
MA1571.1	TGIF2LX	2028	1752	2900	1373	897	3133	3480	3560	8290	4433	1066	686	724	4176	3431	1753	664	864	9362	3600	1404	688	1077	901	1694	1147	1095	1675	2585	1807	752	2243	1136	1563	1294	941	730	1086	1590	1021	919	2553	1827	723	1622	656	2011	1437
MA1572.1	TGIF2LY	1974	1526	2519	1336	854	2552	2917	2697	7767	3451	898	601	620	3476	2970	1293	585	724	8280	2674	1232	557	813	730	1434	915	851	1297	1911	1401	579	1675	893	1142	1014	699	595	858	1228	778	701	2100	1417	588	1317	529	1530	1091
MA1573.2	Thap11	5457	7592	34556	10157	4955	23329	30070	25252	17964	26208	7074	7703	4724	20505	14620	8893	5147	3590	47959	30274	6304	4454	4802	3159	6804	3819	4878	6880	9564	7526	4684	7523	5747	5874	7322	4835	2800	4329	5265	3982	5053	7929	5817	5415	5576	2475	9794	5921
MA1574.2	THRB	14968	30268	48832	24647	11121	70494	80736	81531	61890	81457	16536	28741	18740	63099	59438	25933	18570	14551	175423	89282	20095	11200	13272	10164	15512	11676	14040	19444	18664	17523	14936	14055	17630	11716	19374	10997	7461	11012	10997	10115	11921	15283	13149	13267	17694	8801	20478	10242
MA1575.2	THRB	4293	13417	10369	5334	3035	15060	20173	18681	14350	17637	4097	20147	5651	22629	21801	5762	5816	3417	56367	19874	6800	4704	6565	5122	8991	6073	7262	22505	10035	8389	3719	7276	5263	5837	8939	3711	4589	4366	6048	4195	4054	7257	7950	5891	8962	3109	9519	4828
MA1576.2	THRB	5966	5523	17012	6886	2527	13894	16184	16232	11912	15771	2613	3982	3053	13294	11277	4936	3100	3127	46571	18169	5163	4980	5435	3698	5967	4688	5906	8190	14763	8946	4539	9231	7687	6712	7092	5941	4269	4795	6322	3572	6655	8507	7336	7770	6666	2999	15576	5383
MA1577.2	TLX2	0	0	0	0	0	0	0	0	0	0	0	0	0	0	0	0	0	0	0	0	0	0	0	0	0	0	0	0	0	0	0	0	0	0	0	0	0	0	0	0	0	0	0	0	0	0	0	0
MA1578.2	VEZF1	0	0	0	0	0	0	0	0	0	0	0	0	0	0	0	0	0	0	0	0	0	0	0	0	0	0	0	0	0	0	0	0	0	0	0	0	0	0	0	0	0	0	0	0	0	0	0	0
MA1579.2	ZBTB26	7258	5311	7385	1936	1846	9545	8781	11081	6171	11821	2773	3412	3870	10303	12489	3944	3164	2000	20433	11468	3903	2037	2033	1450	2203	8886	1994	3701	4725	3042	1335	3038	2162	3033	3646	1521	1201	1823	2643	1633	1531	3925	2995	1954	5818	1189	3604	2799
MA1580.1	ZBTB32	550	1459	2193	5091	233	963	1128	1057	844	1029	176	367	206	819	675	477	211	370	3366	1158	254	149	110	114	170	112	116	204	160	155	159	138	150	123	163	116	74	94	122	117	120	117	177	151	179	141	123	97
MA1581.2	ZBTB6	9927	23604	14114	6686	3602	49576	54118	57867	23137	70335	6077	10669	6033	46115	28595	8490	6442	4640	57808	64268	10468	8823	10483	7230	9512	7502	11056	25433	25685	18229	6016	14385	7738	12286	17294	5019	7431	6698	12410	6462	5804	16819	14570	10671	10385	4496	17721	11008
MA1583.2	ZFP57	699	1148	3295	981	391	6247	9611	9932	2826	7716	538	774	520	4492	3667	1160	581	754	9710	11302	2598	1833	2115	3389	3451	1214	2413	1679	14195	2489	995	1385	1876	801	1352	878	2764	1722	1602	1825	1433	1489	1966	2118	2900	1094	2520	868
MA1584.2	ZIC5	43588	97250	130020	78027	28152	111107	185600	157356	93733	142270	30933	37552	48359	115484	110429	61263	45523	43322	350841	183067	65401	37812	51490	36659	74528	23384	58319	55863	61979	51288	35646	29931	54122	20820	41291	24232	31041	34257	27596	37977	35898	29702	37749	44716	55706	18769	49998	17890
MA1585.2	ZKSCAN1	1060	9186	3845	18797	788	5625	5226	5593	6755	5987	1252	1306	1296	5935	4310	1687	1349	1492	19973	7162	1211	839	785	643	894	780	738	1404	891	699	907	629	1003	556	805	965	424	786	502	764	873	795	667	687	957	661	611	513
MA1587.1	ZNF135	10928	43847	41749	19749	13807	42593	52164	52700	35457	50909	13163	22297	17248	50164	37681	22287	17246	11093	162021	55794	19854	10044	16907	11421	17979	11458	17587	23668	17861	15810	9517	11201	13042	9789	15573	8701	9836	10273	11099	9950	9835	13159	13482	11345	17443	7659	15763	8716
MA1588.1	ZNF136	746	1910	4012	1304	900	2814	3108	3025	2711	3053	907	969	919	3853	2177	1350	978	773	9620	3640	1067	537	610	424	631	487	534	990	2858	1391	704	1573	611	1619	2186	478	288	476	1073	390	792	2550	1571	776	659	336	4001	1449
MA1589.3	ZNF140	3041	22033	10805	5882	3543	12882	17745	18368	8924	13611	5812	4716	8185	13739	8950	6731	6563	6581	36936	18068	4796	2581	2518	2329	5417	1966	2641	3481	5972	4176	2553	4049	3107	3367	4427	2392	1882	2081	2807	2076	2598	4767	3663	2943	2875	1724	6644	3203
MA1592.2	ZNF274	1244	4515	5031	6200	1081	6024	5923	5885	3201	5975	1468	1479	1887	5332	3276	2641	1969	1010	14403	6499	2369	1066	1329	932	1560	1051	1362	2434	2173	1813	1421	1505	1634	1314	2397	1559	905	1138	1353	999	1517	1854	1579	1177	1549	740	2224	1200
MA1593.2	ZNF317	733	2917	4267	2852	847	5521	6101	7256	6732	6150	1926	1733	1380	8460	5017	2760	1376	1460	15097	6198	3595	1709	1810	1363	1875	1676	1810	2896	2775	2676	1318	2685	2235	2208	2890	1481	1101	1543	2083	1610	1419	2717	2208	1756	2139	1188	2385	2049
MA1594.1	ZNF382	763	2514	2512	2208	811	2861	3668	3368	3192	3226	813	855	1052	2749	2791	1161	724	685	10998	3570	1028	1031	1158	689	1489	846	1088	1771	2369	1406	1068	1359	1157	1047	1272	842	480	831	1051	819	1029	1194	1240	1078	1233	451	1588	895
MA1596.1	ZNF460	39311	130786	147331	64459	57929	171033	269092	246894	141863	207162	57370	65499	84296	216924	161653	92360	85095	54021	282981	284316	97336	52725	77150	63352	107432	40862	86169	88851	99311	79442	42321	48653	68367	36398	68019	31541	52212	49597	49057	51339	48734	51474	62875	57974	84447	34423	78963	35034
MA1597.1	ZNF528	3790	11222	7993	19805	4211	12924	14724	15431	14854	21766	4208	8831	5286	20778	15540	9552	5471	4666	59138	16666	9588	3985	5028	4337	6505	4704	5063	7769	7302	6576	2847	5904	3836	5413	6649	2899	3693	3327	5070	3319	2871	6390	5932	3931	5918	2987	6422	4798
MA1599.2	ZNF682	20553	48450	188427	41082	24145	127139	175652	164977	129367	163470	30453	42612	36676	148949	120056	50707	35871	24417	277567	183031	45246	30846	50079	33452	51965	27853	53918	57325	72234	55279	27255	45003	34490	36028	52308	22518	28221	33639	38978	31668	27859	47345	46578	35485	51028	18541	61841	32550
MA1600.2	ZNF684	15426	42690	59284	37711	13595	74479	89328	95682	59214	85298	22137	26330	22998	83602	54975	31717	24046	19113	192147	104187	24042	19496	16130	12289	18761	12701	16570	23398	19724	18734	15149	16409	18782	14452	22344	13907	9719	12675	13459	12542	13526	17578	15367	15322	18141	9750	19670	12905
MA1601.2	ZNF75D	2977	11585	9073	6325	5607	18708	20520	19217	16527	22977	5844	6548	6726	20892	16981	23227	6400	4835	62971	22358	9138	4025	4782	4503	5963	4314	4777	7825	10290	8923	3154	7128	5482	6081	10602	3740	3342	3842	5526	3914	3629	8625	6900	4315	5799	3267	8203	5461
MA1602.2	ZSCAN29	497	828	1855	915	307	2901	5471	4455	1527	3217	319	820	550	2083	1791	553	623	382	5263	5207	612	449	367	384	543	282	384	658	419	862	708	311	496	230	357	357	376	351	267	282	410	294	325	558	565	283	333	205
MA1603.2	Dmrt1	398	1135	968	2231	320	593	748	746	745	530	202	388	220	585	459	445	219	265	1960	907	243	118	129	104	149	311	121	699	114	144	140	113	105	144	163	111	61	117	155	103	136	147	93	112	528	108	287	101
MA1604.2	Ebf2	16908	37072	98314	53009	21190	113024	129718	109284	72589	161152	15431	40038	20204	96278	87483	35055	19933	15313	266780	123938	30240	24182	41667	26474	43629	27298	43697	59062	56518	49414	16752	42703	25139	35037	49881	18157	29155	25469	35075	20027	19402	46667	42274	27728	46827	17826	60467	29754
MA1606.2	Foxf1	2070	1240	1640	534	309	961	1023	893	921	1044	221	207	305	721	644	588	230	314	3814	893	314	232	190	207	243	214	199	281	260	237	243	222	813	200	256	331	226	199	178	240	359	235	287	227	333	140	280	162
MA1607.2	Foxl2	1872	908	1742	675	488	860	916	894	690	977	191	170	301	610	538	538	219	283	3089	975	258	203	128	153	196	165	135	228	204	157	205	162	548	202	212	206	107	148	166	152	233	189	400	185	228	111	183	162
MA1608.2	Isl1	640	1438	4994	2407	725	2485	3754	2808	1939	2866	594	1602	681	3129	2234	1121	778	660	8102	2953	768	462	470	366	428	334	455	550	359	365	2328	366	1061	292	443	496	330	430	268	395	569	847	523	563	451	317	453	333
MA1615.2	Plagl1	23377	35851	52772	43092	16440	88340	126038	110848	75539	101420	17657	34841	25099	90583	93429	20832	23523	15699	249861	123259	32021	16329	29215	20029	25844	14558	31105	38182	73286	35464	21416	34930	29917	26856	32667	24902	22618	27431	24395	18264	28430	35642	30105	19848	30852	13455	59924	22999
MA1616.2	Prdm15	2634	13610	8894	2753	2709	9946	11072	10315	8316	16259	5034	5880	5984	13464	7416	6278	6187	3075	27758	11031	8125	4784	2966	2521	3310	2156	2837	4270	6886	4572	1382	4568	1948	4095	11432	1536	1900	1728	3581	1666	1725	5487	4389	4991	3041	1783	6753	3716
MA1618.2	Ptf1A	2017	4489	5165	4767	1571	5819	6517	6749	6417	6651	2206	2352	2280	6498	5000	7245	2215	1714	24102	7423	2845	1422	1622	1263	1794	1462	1650	3208	2666	1972	1590	2110	2383	2008	2282	1818	957	1617	1739	1434	2042	2222	1820	1426	2165	1079	3016	1904
MA1619.2	Ptf1A	2431	13347	9850	11887	6317	14174	17100	18701	19191	16574	7582	2509	2690	21510	14051	5128	2517	3614	37244	19392	6225	3516	5634	4307	6641	5572	5597	6423	12320	7621	4117	10410	6943	8241	7770	8142	3332	5520	6898	5190	5668	9610	7787	3385	7401	3017	10210	7285
MA1620.2	Ptf1A	3172	4487	8831	6602	3584	11493	11767	12533	16053	17684	2799	3593	2548	13058	11669	6880	2557	2678	45697	13644	4821	1467	2768	2225	3241	2332	2629	4091	13204	7789	2021	9367	3028	5924	5642	2525	1804	2658	5123	2545	2645	8543	5540	1496	3731	1658	13745	5534
MA1623.2	Stat2	991	9279	6547	1785	1837	3731	5624	4041	3723	3866	2721	2053	3153	4067	2738	3571	3214	2232	11395	4333	2119	1394	1442	1325	1442	999	1916	1458	1838	1385	1042	1307	1187	1300	2049	820	711	877	1075	911	1000	1703	1222	1607	1214	1077	1626	1337
MA1624.2	Stat5a	1741	3325	3995	1773	1637	4745	6416	4903	3317	5363	1992	2248	2339	6083	3145	3973	2619	1503	21244	5317	3025	1365	884	723	1028	788	835	2023	2573	2072	601	1758	855	1531	3526	1293	660	672	1410	669	693	2260	1600	3051	1088	670	2467	1572
MA1625.2	Stat5b	2652	5079	6931	77485	2742	10479	11994	10966	6469	21017	2943	3587	3675	11587	6580	5200	3550	2667	24965	11322	5287	3004	2196	1759	2501	1996	2058	3294	6836	4817	1383	5635	2486	4217	7751	2406	1552	1854	3582	1755	1740	5890	4020	1909	2634	1506	6599	4173
MA1627.2	Wt1	86415	354164	366697	147931	125336	376031	280056	257000	353234	430429	169576	172036	221878	469620	309532	229219	224036	132793	323343	285322	199657	81142	95710	92587	149171	69625	102569	123173	117102	105750	73759	71629	104294	58355	105797	57159	55081	69414	65068	73182	71770	78982	80004	83433	118132	72818	102266	51913
MA1628.2	Zic1::Zic2	5035	30825	26379	20763	5489	45257	65543	56856	57842	55585	9652	9554	9080	58795	47858	15320	9957	12093	119151	66117	19232	13249	24310	17028	21529	13191	25869	23729	38510	25926	11336	22967	16324	17454	19737	11634	16833	16298	18114	16377	13203	21765	20442	15113	21791	9544	27056	15717
MA1629.2	Zic2	5131	20500	25346	19928	7759	45399	53299	53726	52386	54787	9096	9503	9283	55715	43765	11853	9526	8566	101136	58729	16063	10441	18175	12093	16435	11021	18678	22419	30066	19513	9233	20906	13761	17536	18704	11808	11001	12465	15572	12826	10767	20959	17605	11220	17239	7921	21241	15754
MA1630.3	ZNF281	94901	274591	260290	143178	108848	356659	298620	287839	291429	390865	142288	259855	182232	456682	326391	401395	192223	252183	211623	302921	156086	436616	249343	371967	114295	331490	257092	234187	475635	479241	372761	60766	280084	240840	412300	235814	214551	316083	265902	308628	354641	315823	325742	410648	296519	321087	454014	213270
MA1631.2	ASCL1	8863	19356	31398	35243	5441	50863	59551	64149	70563	64691	10254	24143	11195	64318	44312	21353	11673	11759	144216	70957	24642	10997	17427	15289	19837	12771	17979	18200	28325	21143	9050	19697	13325	15952	19662	9276	12342	13287	15456	12103	10645	19993	18088	11896	19489	8898	20932	14664
MA1632.2	ATF2	10812	1244	2352	4295	705	1960	2794	2027	1343	2174	811	1019	854	2425	1123	760	819	493	4236	2183	553	618	532	296	482	259	669	743	1140	821	703	681	877	548	1441	1482	377	663	575	538	855	870	745	527	545	237	1278	493
MA1633.2	BACH1	255	1519	1351	929	351	1649	1659	1813	1132	2100	293	660	295	1430	1013	505	258	430	3842	1855	370	260	280	256	353	254	280	470	455	383	259	409	315	292	489	230	207	292	291	297	237	395	396	283	381	163	437	314
MA1634.2	BATF	283	1190	1302	951	354	1965	1923	2248	1532	2446	225	295	818	1680	1300	552	232	467	4480	2148	412	347	288	267	368	296	293	508	541	449	273	473	317	352	527	237	200	249	318	306	272	461	465	297	437	161	468	328
MA1635.2	BHLHE22	0	0	0	0	0	0	0	0	0	0	0	0	0	0	0	0	0	0	0	0	0	0	0	0	0	0	0	0	0	0	0	0	0	0	0	0	0	0	0	0	0	0	0	0	0	0	0	0
MA1636.2	CEBPG	306	1151	1154	1394	305	913	888	864	827	1159	482	562	512	1581	826	755	528	383	2915	979	553	211	271	212	250	183	246	317	306	217	253	394	277	275	248	320	144	203	186	200	249	277	230	228	274	180	228	237
MA1637.2	EBF3	15094	35724	104485	54868	20620	113398	131819	110734	74353	161996	14810	41503	19382	97986	89747	34992	19219	14921	273173	125492	30338	25275	43468	27365	44532	26900	45663	58925	55657	49599	17222	42333	25376	34540	50252	18011	30803	26308	35185	20679	19675	46393	42671	28802	47422	17852	60234	29216
MA1638.2	HAND2	0	0	0	0	0	0	0	0	0	0	0	0	0	0	0	0	0	0	0	0	0	0	0	0	0	0	0	0	0	0	0	0	0	0	0	0	0	0	0	0	0	0	0	0	0	0	0	0
MA1639.2	MEIS1	1090	1333	3465	1027	430	1755	2193	1602	1081	1809	619	604	572	1415	1152	827	553	378	4533	1651	577	558	417	237	431	659	412	625	837	754	644	735	644	598	537	380	202	388	630	354	489	703	605	476	624	199	774	539
MA1640.2	MEIS2	630	1265	3524	795	254	869	1168	1000	698	881	339	251	263	913	611	675	260	274	2137	1193	315	214	274	173	245	535	322	318	959	337	687	494	737	398	330	366	126	211	345	174	611	569	386	191	422	144	1313	504
MA1641.2	MYF5	2314	13042	9518	11560	6164	13564	16382	17842	18284	15944	7368	2310	2492	20490	13328	4868	2302	3478	34968	18704	6014	3324	5450	4168	6454	5338	5424	6142	11940	7372	3944	10070	6660	7962	7510	7932	3250	5340	6652	5006	5460	9200	7482	3258	7108	2882	9910	7044
MA1642.2	NEUROG2	3627	6762	5131	6138	1723	8502	9154	9199	9246	9431	2847	3411	3512	11466	7264	25847	2978	2500	28296	9646	4156	2188	2082	1748	2367	1812	2067	3705	2619	2349	2224	2358	3012	2173	2991	2088	1294	1975	1895	2096	2399	2303	2123	1968	2502	1477	2693	2059
MA1643.2	NFIB	10710	9182	37357	10446	4115	43488	50286	50128	39326	49122	5673	9476	7624	47625	92019	10445	6217	5676	102300	52372	14449	7677	12782	10595	13908	16351	13521	14725	23695	15131	4770	14146	7308	11729	15304	5362	9493	8083	11029	7390	5836	16932	12964	8944	23249	6102	16030	10880
MA1644.2	NFYC	1814	3983	5262	2964	1116	4897	5080	5521	5319	5046	3286	1965	4678	4260	5271	1734	6165	1794	18216	5868	1120	543	477	391	459	369	461	607	965	686	801	586	679	772	803	528	298	433	522	435	675	833	625	586	540	312	901	574
MA1645.2	NKX2-2	3536	8018	13392	10453	3442	25043	30367	29067	20089	28591	5962	6799	6378	21219	17589	7351	6337	4612	70391	30904	6486	2999	2682	2174	3974	2840	2703	4637	4932	4275	3320	3817	4307	3555	4719	3252	1796	2975	3271	3019	3138	4255	3670	3014	3885	1823	4561	3203
MA1646.2	OSR2	1483	3612	4680	8691	1628	7914	9069	7739	9784	7987	3501	2255	2950	15900	7515	3654	6072	2311	27146	8884	4375	2004	2333	1544	2243	1706	2253	2915	3010	2449	1160	2422	1763	2192	2557	1318	1301	1490	1910	1555	1373	2249	2169	1670	2387	1219	2478	1815
MA1647.3	Prdm4	2464	4865	5512	1984	1660	7377	8363	7379	4584	14691	1553	1800	1943	6223	4873	3338	1971	1548	19224	7895	2682	1198	1500	1352	1722	1751	1493	2350	2898	2032	1000	2498	1003	1781	2313	887	1010	904	1433	778	1039	2808	1870	1417	1842	1168	2954	1944
MA1648.2	TCF12	4221	6725	21440	10248	3526	26854	33847	32409	31570	31704	6577	19813	7977	32963	23405	17684	8476	7119	80863	35311	15388	6517	9704	9174	11860	6627	10148	9737	12120	9968	4574	8585	6978	6541	8850	4507	6942	6948	7297	6771	5447	8478	8876	6675	10726	4807	9672	6079
MA1649.2	ZBTB12	947	3756	4804	1842	3366	6811	7318	8200	3241	9199	925	5755	1147	5579	5257	1615	1021	1269	43589	8423	2051	858	820	557	787	682	825	1418	2493	2326	702	2055	918	1530	2064	675	491	917	1438	777	743	2757	1607	827	912	402	2965	1478
MA1650.2	ZBTB14	6946	9033	27651	11869	7314	27267	45312	40294	18769	32817	7801	10484	14018	30927	25804	14492	11584	13719	80988	42385	16112	8948	12531	12127	17147	5763	14114	12436	21425	16763	7880	9353	12318	5059	10310	5466	13268	10460	9275	11694	9843	7698	12522	11020	14335	5040	16235	5083
MA1651.2	ZFP42	1803	18308	5510	4536	1990	9160	29095	11086	9668	9829	1881	2232	2249	7812	5365	3971	2457	3366	22758	13436	5632	1591	2544	1602	2503	1312	2679	3194	3543	2099	2662	1741	2795	1504	2315	1981	1564	1856	1448	1840	3355	2514	1819	1895	2508	980	3401	1693
MA1652.2	ZKSCAN5	31263	63365	143135	47487	33193	128803	167417	156023	124595	150861	51075	50796	57256	168362	91431	57380	57329	38828	405707	160977	54912	29577	34417	29416	44237	26562	35433	48111	41197	35644	27619	30656	37980	26790	39039	26619	21014	26649	27046	26673	28514	31954	31169	30331	37890	23956	39769	24989
MA1653.2	ZNF148	227842	498376	308643	307647	223996	251775	436381	371081	417144	284765	270285	396544	364487	349769	238666	314672	349120	393508	378912	484485	332790	346736	400976	297138	335345	254430	427675	391383	383920	368201	260334	179390	421225	163026	299088	150104	185348	233213	201096	232895	265050	218877	252898	310291	489904	247040	339361	150395
MA1654.2	ZNF16	7643	32748	51792	34408	11793	50717	61966	61397	46641	58944	12733	19783	17770	61407	54938	17617	14937	11771	194822	69553	17500	13651	15585	11323	17642	11105	16695	22607	23014	18783	13903	16253	17089	13743	22723	10002	10426	10547	13819	10498	11736	17092	15748	14948	17847	7713	21299	12471
MA1655.2	ZNF341	1809	5090	5839	39738	3838	9668	11851	11962	7654	10687	2521	2837	2315	9981	9259	3800	2690	2593	26291	13873	3653	2590	2707	2225	3136	3995	2788	3879	4397	3959	3774	3705	5160	3324	4669	6047	1909	3316	2930	2639	3778	3931	3842	3124	3503	1669	4829	2950
MA1656.2	ZNF449	17172	33656	48887	27652	13385	86639	101982	107751	69871	111492	20895	23676	24171	80642	57956	29055	22635	14714	161925	115144	26971	19629	22215	13750	24488	18737	23108	27400	41826	29641	22896	29785	29799	24548	31436	20798	11561	23267	22046	22827	23196	31220	25314	23588	26935	9574	35248	22816
MA1657.2	ZNF652	882	1679	11774	3191	922	2777	3008	3002	2088	3398	646	689	655	2911	2128	1514	674	783	6486	3282	925	695	593	498	618	476	677	746	920	619	758	891	809	797	3117	553	388	465	575	446	498	1090	753	586	867	456	1359	724
MA1683.2	FOXA3	2070	1240	1640	534	309	961	1023	893	921	1044	221	207	305	721	644	588	230	314	3814	893	314	232	190	207	243	214	199	281	260	237	243	222	813	200	256	331	226	199	178	240	359	235	287	227	333	140	280	162
MA1684.1	Foxn1	0	0	0	0	0	0	0	0	0	0	0	0	0	0	0	0	0	0	0	0	0	0	0	0	0	0	0	0	0	0	0	0	0	0	0	0	0	0	0	0	0	0	0	0	0	0	0	0
MA1707.2	DMRTA1	544	872	1525	3737	243	518	707	696	460	576	158	173	178	472	390	305	180	187	1709	736	183	114	68	85	109	73	75	107	80	91	93	123	80	78	81	62	34	83	64	63	74	264	81	80	95	69	117	83
MA1708.2	ETV7	8699	6966	13303	5994	4620	19266	23166	25352	16410	19952	5374	5451	5609	21428	14169	8505	5817	5444	42218	24638	7823	4771	3133	3663	4042	2683	3266	3986	4852	4053	3607	3483	4426	3211	4471	3086	2500	3329	2931	3321	3474	3801	3402	3767	4887	2546	4110	2442
MA1709.2	ZIM3	881	4530	3642	1811	1027	3148	3543	3445	3383	3344	1330	1035	1131	3053	3838	2990	1215	1311	9522	3766	1746	1129	974	843	1366	1157	982	1490	1550	1366	903	1259	909	1282	1513	849	481	753	1002	668	1069	1680	1368	1331	1411	746	1486	1233
MA1710.2	ZNF257	23651	66151	121317	37295	39842	123276	151055	151714	114581	137377	56892	67541	61724	176698	111960	68180	65254	39174	373454	165349	56585	36608	39759	34545	49936	28502	40495	53124	49260	37371	24326	30585	34170	26832	38592	24298	28547	25619	28156	26395	26983	33387	32218	33216	44593	26310	35647	24276
MA1711.2	ZNF343	8357	12134	14178	10592	5990	35692	43451	44630	28123	38024	8132	9961	10724	40385	25632	11812	11579	7671	71493	47997	14429	12792	10491	10744	14284	7520	11058	13371	13161	10638	5919	7681	9137	6248	10751	5750	8940	8032	7990	7756	7216	8143	9070	9789	12572	6401	10016	5844
MA1712.2	ZNF454	16809	42002	220552	64406	15714	140162	198905	182522	89699	181515	16910	27567	22779	166313	130615	28995	22422	21146	309911	205635	54666	46535	67747	64348	80654	38271	80101	69398	101189	85903	28073	54777	45907	38142	64438	22410	64242	44261	56132	41943	35599	54469	68778	51865	76599	24709	93570	37049
MA1713.2	ZNF610	10126	27311	83005	30898	15656	76592	154073	131974	51856	94164	18742	25106	26661	86429	69204	43064	27952	28579	206848	154157	45727	32952	42353	42550	71939	24793	50666	41190	78477	58921	29867	34313	45633	18570	43314	17348	45430	37137	38693	42577	38128	30138	49030	45096	65081	14739	64190	22860
MA1714.2	ZNF675	11044	42343	46871	46029	11455	32439	60323	36106	28595	35093	13255	12868	17049	39112	25892	21259	16587	12947	101326	39534	14791	10896	10547	8275	10770	6689	11184	13589	16655	11686	12274	11121	14519	10755	18439	9372	6553	8633	7893	7153	10061	14637	9765	10391	10174	7438	22347	9345
MA1715.1	ZNF707	29257	80338	92965	38618	20537	121970	151811	143900	96266	158489	25084	42385	32826	128518	90118	38658	31528	21408	339458	158570	36191	22465	23375	17061	38901	18379	24189	35107	43622	33131	17418	29363	22875	22421	35864	15597	13645	17951	22426	17565	18527	28465	25372	24543	29892	12582	38485	20036
MA1716.2	ZNF76	10100	46982	39604	78657	9846	60392	71177	70649	59327	70641	16442	18083	19059	57793	49772	18230	17898	12189	168969	76588	20616	18978	17105	12629	19897	11960	17974	23630	29902	24933	19271	18753	26546	16918	21372	16252	11300	17606	15175	16062	19534	21724	18714	16675	20485	8436	30729	14972
MA1717.2	ZNF784	1526	4731	7944	9364	1693	6252	6713	7089	7691	6571	2371	2443	2268	8429	7432	2743	2388	1755	27721	7628	1853	1149	1197	1028	1684	972	1273	1631	1000	1076	1007	1355	1139	844	1340	821	734	1023	761	869	839	1076	945	1178	1346	1019	1057	707
MA1718.1	ZNF8	109	759	5941	1239	161	457	506	498	486	476	142	132	152	459	317	295	128	150	2193	512	184	81	93	72	104	92	99	177	148	123	110	101	108	112	143	82	50	96	104	71	91	145	117	96	101	72	157	114
MA1719.2	ZNF816	27588	78987	192455	82999	33949	163135	222425	202409	151298	193438	39433	48274	51983	169798	160142	65642	51388	48032	251489	215861	62304	43772	67599	45223	76849	40533	72117	91254	124845	85143	47536	75587	70937	58015	79067	46778	45214	49717	55324	40797	53949	76958	68315	57211	77079	31498	133083	48867
MA1720.2	ZNF85	554	3027	2130	1184	615	2773	2979	3227	2275	3067	779	973	910	3382	2242	1634	950	760	8695	3246	1223	619	611	482	907	526	582	906	1245	1026	496	1323	597	1296	1063	825	407	508	834	532	771	1468	982	584	689	420	1147	1188
MA1721.2	ZNF93	10435	46447	52223	28353	19460	90332	162328	126490	94709	111432	22294	31276	36024	99584	100862	57117	58530	36205	268776	149996	61947	46720	65886	66172	100431	33267	79270	60674	107621	84382	34838	45056	56694	25825	52256	20515	64512	46133	53174	52974	46349	42190	69543	60986	95814	21046	85204	32278
MA1722.2	ZSCAN31	1133	2962	6020	25911	848	7128	8172	8138	6296	7941	1698	1611	1279	7850	5806	2133	1502	1327	17165	9025	1967	1317	1761	1536	1768	1416	1860	2056	3519	1625	2304	1751	2424	1449	2526	1625	1411	1883	1282	1480	2913	2067	1474	1503	1589	1076	1934	1480
MA1723.2	PRDM9	250601	256435	336741	371938	270566	351159	271844	479803	324817	396487	384165	348266	298462	466537	303319	380416	292712	244840	329724	297562	365869	236554	296163	181786	428746	162974	314988	303993	258839	273242	239319	12482	374010	138104	238603	142549	119183	165652	143505	164538	217562	180258	170736	238051	320754	166232	281843	119431
MA1724.2	Rfx6	2265	7319	6123	6026	2375	10844	10751	10197	9032	11540	3170	4842	2635	10255	9360	4645	2472	2277	33327	10690	3398	2382	1929	1825	2600	1783	1977	2516	2154	1838	1452	1549	1873	1407	2864	1472	1363	1717	1282	1455	1589	2584	1571	1846	2380	1460	1709	1235
MA1725.2	ZNF189	3170	14198	16848	12875	4014	26334	29634	31151	24409	29559	6257	6912	6937	29298	23003	10143	7334	6816	115357	34777	10091	7100	8340	6477	8420	6527	8336	11066	16311	13184	5567	14422	7299	11454	13988	6237	5612	6577	10383	6206	6108	13304	11647	7184	8874	4851	13948	10486
MA1726.2	ZNF331	8559	12289	17222	15258	2816	38468	44752	45728	29801	45700	5489	9578	8947	54098	34822	9795	7027	4796	64023	48232	12023	11683	16337	12155	15416	10779	17348	16885	26721	20377	8726	19862	13229	16355	23233	9305	11859	11628	15234	12110	11097	18852	18437	11484	16240	6382	20468	15346
MA1727.2	ZNF417	4497	10881	13009	8737	3320	13144	17309	14240	13420	15452	2050	2231	2186	21974	10884	8364	2146	4630	37858	15182	6441	4116	6582	4995	5764	3708	6590	9057	8112	6575	2706	6278	4187	5412	5473	3042	5796	3685	4629	3532	3677	6299	5181	4777	6595	2586	8566	4822
MA1728.2	ZNF549	10274	59227	44524	24685	7741	77918	114809	102160	88595	89771	12792	18854	20311	95110	66028	24605	18269	17630	181142	118391	33662	24507	38732	29145	38722	26757	40728	37236	56596	37504	25433	35004	35477	28568	35422	26419	31585	31468	28527	30699	30096	35084	33294	25932	45876	14865	40580	27320
MA1729.2	ZNF680	772	4485	3750	1215	1228	2738	2961	2789	3297	2815	1307	1300	1673	3399	2500	2592	1767	1287	10749	3029	1900	1019	1004	721	1029	692	1419	1326	1180	1011	560	919	656	934	2407	564	509	563	836	538	598	1277	913	739	996	577	1319	797
MA1730.2	ZNF708	2390	7846	21712	12020	1484	15587	19400	17815	17004	18127	2129	2223	2148	19264	14141	5440	2153	2840	37488	19275	5714	4516	6650	4614	6502	4927	6766	7346	12198	8767	4050	10548	5916	8622	8657	4006	3428	5116	7223	5453	4359	9676	8351	4894	6940	2885	10780	7428
MA1731.2	ZNF768	11884	22341	61573	29249	9636	41186	46868	45244	32986	44267	19931	24205	23913	50141	30827	20366	23792	13200	112143	47536	16837	8027	10132	9136	11869	12646	10580	18801	15641	13836	6508	13849	9927	11454	18415	6832	6690	8113	10469	7809	7120	13992	11840	8290	17558	7332	15792	10631
MA1928.2	BNC2	283	1190	1302	951	354	1965	1923	2248	1532	2446	225	295	818	1680	1300	552	232	467	4480	2148	412	347	288	267	368	296	293	508	541	449	273	473	317	352	527	237	200	249	318	306	272	461	465	297	437	161	468	328
MA1929.2	CTCF	6303	8944	12898	6727	2466	19696	26483	26770	18546	26683	3209	4025	4000	24274	18400	6874	4185	6256	50755	29757	9015	5204	8843	6424	9277	4815	9806	10733	17129	8419	4023	6664	6488	5018	8632	3637	5681	5410	5661	5839	4806	6603	7437	5914	8733	3064	9168	4393
MA1930.2	CTCF	4059	7165	10152	6997	1922	16577	25350	21492	17221	22074	2887	3597	3784	19596	16227	4582	4167	3301	45963	24139	8161	4296	7320	5470	7748	3702	8131	7921	14449	7394	3473	5959	5815	4240	6144	3194	4795	4679	4913	4986	4354	5681	6145	4931	7252	2592	8255	3831
MA1931.1	ELK1::HOXA1	4094	1628	1957	1176	793	2793	3972	3580	2136	3137	1041	875	944	3103	2145	1183	988	1230	9088	4067	1576	532	285	468	449	232	393	483	663	477	693	355	696	638	409	390	290	462	304	523	607	433	358	472	431	295	481	241
MA1932.2	ELK1::HOXB13	2343	804	1426	1156	636	1532	2222	1817	1182	1646	510	513	888	1601	1299	702	795	549	5773	1922	928	491	242	310	382	302	264	406	430	331	382	266	436	233	306	201	234	299	274	316	346	334	320	312	370	192	418	183
MA1933.2	ELK1::SREBF2	3154	3319	7084	2698	1885	11000	13457	12383	6995	10390	2231	3157	2430	9331	6224	3415	2554	2311	29441	14603	4536	2368	1989	1983	2533	1351	2183	2982	3143	2588	2676	2035	3280	1530	2155	2086	1650	2135	1776	2012	2427	2091	2194	2134	2488	1174	3016	1377
MA1934.2	ERF::FIGLA	2943	13235	20090	8884	3563	17495	21583	21716	17265	23128	3613	4588	4801	21192	14248	8190	3744	4411	62539	22954	8014	4930	6242	6154	8355	4931	6598	8365	12441	9114	3453	8537	4653	5541	7035	3442	5758	5205	6601	4282	3885	7093	7422	5754	7816	3551	9655	5240
MA1935.2	ERF::FOXI1	2407	4352	11231	2995	3532	5913	7011	6517	6225	6309	2400	2279	3316	7820	5273	3401	2908	2808	22962	6773	3179	2217	1993	1367	1635	2218	2540	2583	2160	1808	1640	1758	1588	1577	2249	1318	1157	1566	1423	1417	1434	2011	1703	1797	3561	1171	2143	1407
MA1936.2	ERF::FOXO1	2847	7061	53327	4528	3690	7876	7497	7696	7252	8376	2738	3058	3707	9399	5168	3740	3548	2628	30539	7982	4879	2670	2613	1762	2390	2704	3049	3409	3055	2365	1848	2406	1990	2196	2933	1641	1556	1842	1880	1601	1706	2698	2379	2257	4161	1532	3026	1911
MA1937.2	ERF::HOXB13	507	1034	2124	811	500	1306	1500	1601	958	1326	552	657	819	1241	1005	955	815	551	5386	1730	655	349	346	326	395	299	350	423	442	333	385	333	760	315	379	272	203	230	298	290	336	372	320	318	399	298	448	265
MA1938.2	ERF::NHLH1	3236	3628	16188	11416	1541	14615	19888	20897	15068	16770	2502	3468	2734	15576	12641	5837	2876	3083	40334	20841	6342	4576	6842	5378	7264	4709	7284	6887	11457	6824	3437	5983	5098	4605	7989	3324	5040	4664	5682	4868	3985	5707	6129	4896	10931	2713	7374	4137
MA1939.2	ERF::SREBF2	814	778	6923	751	449	1859	3704	2169	1425	2095	661	598	603	1781	1502	899	630	474	7159	2582	848	377	545	451	594	339	522	689	859	606	399	650	508	511	564	445	403	470	483	395	439	703	630	419	578	295	999	431
MA1940.2	ETV2::DRGX	436	945	1150	669	258	823	958	920	620	1005	419	405	456	850	710	723	432	418	3158	963	431	208	180	192	202	143	173	267	228	210	302	188	671	163	181	230	119	139	161	172	260	257	196	196	180	176	255	313
MA1941.2	ETV2::FIGLA	5108	11865	27654	13060	5027	30149	33172	35919	27559	37923	5049	6377	5520	41402	23260	12024	5592	6174	89177	38644	11897	7419	9198	8344	11220	7176	9667	11700	14897	11873	5163	11059	6948	7720	10288	5172	7753	6677	8744	6375	5701	9597	9646	7958	10782	5393	12320	7175
MA1942.2	ETV2::FOXI1	2524	4316	48385	3131	1839	6002	7257	6760	6201	6695	2095	2031	2975	7567	5421	3019	2519	2534	17930	7108	4623	1908	2173	1203	1304	1208	2448	2470	2231	1704	1576	1724	1446	1491	2026	1237	1011	1297	1333	1242	1370	1873	1590	1660	1664	1045	1933	1356
MA1943.2	ETV2::HOXB13	313	676	1054	548	204	855	1421	1219	503	864	232	276	280	656	1012	495	247	240	2056	1438	302	158	170	151	169	95	186	233	219	260	212	184	178	138	201	136	116	125	131	93	186	192	157	131	173	109	261	179
MA1944.2	ETV5::DRGX	1019	1142	1545	947	482	2034	2817	2165	1527	3013	783	679	709	2181	4586	1027	697	729	5853	2198	799	487	375	369	436	312	363	509	440	378	435	401	415	433	800	313	237	311	335	357	379	506	361	413	385	335	449	463
MA1945.2	ETV5::FIGLA	9346	27994	55562	32341	9603	66608	77369	81624	63356	82227	16319	17522	19418	91219	48873	29418	19296	15573	196740	91046	24491	16946	21091	17255	27287	15962	22060	26378	33016	24759	12547	21815	15448	17289	23686	11296	14837	14595	17397	13796	12706	20942	19699	20661	25303	11738	24787	15400
MA1946.2	ETV5::FOXI1	2559	9784	17167	5219	3379	10336	10560	11546	11744	10738	4297	4247	5069	13331	7887	5796	5105	4466	42937	11978	5426	5372	4161	3010	3533	3304	4458	5032	4857	3739	2844	3875	3226	3238	5600	2571	2857	2852	3133	2684	2651	3788	3601	3310	4607	2642	4139	2932
MA1947.2	ETV5::FOXO1	2733	15325	16042	5381	2794	11200	11093	10760	10957	10339	4488	5229	5473	13053	11971	5296	5020	3754	34267	11118	4558	2929	3352	2556	3196	2432	3850	4327	5110	3975	2342	4669	2630	3861	6340	2632	2462	2337	3329	2243	2470	4373	3941	2886	3351	2132	4812	3504
MA1948.2	ETV5::HOXA2	871	1227	3247	1032	676	2197	2249	2164	1511	2533	571	681	665	1664	4481	1031	659	647	7146	2329	904	662	455	421	547	342	503	760	573	498	772	447	931	405	559	795	320	561	387	565	688	517	489	447	459	383	536	376
MA1949.2	FLI1::DRGX	568	620	1192	737	282	1446	2298	1744	823	1729	330	359	450	1435	1027	591	448	405	4399	1908	475	198	175	189	200	144	192	271	311	228	302	224	252	170	596	160	120	173	172	179	217	279	191	221	175	126	220	222
MA1950.2	FLI1::FOXI1	2107	5317	12813	2630	1549	4410	5175	5013	4532	4760	2019	2146	2473	5475	3839	2683	2382	2094	19589	5234	2628	1390	1679	1019	1273	1159	2095	2077	1836	1413	1318	1472	1271	1346	1979	1122	836	1235	1159	1055	1104	1685	1456	1213	1820	888	1888	1215
MA1951.2	FOS	5394	816	2214	5033	482	878	2708	1069	1016	932	474	400	460	1867	660	671	385	589	2549	1151	408	454	778	400	720	267	945	825	1282	726	470	595	686	325	1998	1209	530	599	515	462	604	678	663	539	638	228	1177	358
MA1952.2	FOXJ2::ELF1	1635	3077	6362	2484	2657	3325	4219	4046	3860	3605	1306	1243	1951	4053	2779	1947	1657	1461	12830	4454	1544	1000	876	573	677	535	1374	944	1393	816	972	887	772	711	1205	552	408	586	566	596	723	914	834	672	760	474	1260	589
MA1953.2	FOXO1::ELF1	2397	5673	11900	2836	1435	4622	5364	5427	5095	5075	1556	1607	1963	5876	3862	2585	1765	2250	21317	5695	2394	1821	1619	1040	1496	1107	2050	2273	2064	1605	1404	1696	1303	1533	2327	1196	899	1098	1291	1008	1127	1726	1624	1552	1508	938	2012	1315
MA1954.2	FOXO1::ELK1	2559	5988	14045	3251	3372	5675	6414	6337	5880	6137	2110	2027	2591	7708	4824	3274	2463	2747	28961	6519	2951	2111	2017	1304	1632	2105	2403	2999	2307	1863	1607	1819	1570	1713	2612	1366	1155	1320	1473	1263	1370	2008	1762	1856	3063	1343	2231	1523
MA1955.2	FOXO1::ELK3	1834	4565	4299	1873	917	3273	4458	3711	3445	3208	1099	1133	1477	3753	2494	2364	1316	1335	15730	3995	2452	1052	1206	754	859	733	1680	1529	1617	1091	998	1189	957	1002	1733	846	731	767	830	743	806	1177	1184	848	960	686	1621	845
MA1956.2	FOXO1::FLI1	1646	3474	4014	1384	765	2479	3196	3017	2528	2605	987	863	1238	3316	2077	1712	1128	1327	14506	3279	1985	881	1019	518	715	604	1380	1250	1093	734	810	845	698	758	839	664	457	572	614	560	667	892	865	720	804	514	1085	676
MA1957.1	HOXB2::ELK1	1878	1129	1732	1337	590	1884	2437	2225	1392	2044	566	517	645	1703	1394	910	680	685	16416	2427	911	354	294	337	374	208	317	459	382	372	415	299	453	220	284	269	203	342	274	365	440	347	308	321	346	217	338	221
MA1958.2	HOXD12::ELK1	642	1588	1929	980	745	1669	1809	1653	1353	1546	689	619	862	1684	1225	1030	929	662	5452	1824	673	439	378	372	479	582	396	540	595	519	460	487	450	455	564	413	292	304	394	361	363	711	424	430	1506	341	601	383
MA1959.2	KLF7	167499	440989	459766	208700	172408	121812	240272	195485	77147	135543	248933	311618	338474	352115	470534	361203	340121	224974	321605	213584	306250	121322	134091	112562	213094	107966	149351	172060	220625	177824	116934	114621	168670	92273	167325	90156	69861	113327	110068	120758	122891	129261	143552	124723	197059	89130	195828	83291
MA1960.2	MGA::EVX1	1926	4581	8650	4784	1813	6290	8152	6931	5231	7387	2481	2948	2842	7099	4899	3034	3415	2488	21201	8102	2138	1792	1777	1114	1651	1244	1861	2298	3130	2313	4850	2261	4002	2025	2938	2268	1068	1560	1641	1287	2229	2612	1873	2478	1797	877	3446	1909
MA1961.2	PATZ1	427409	292401	328585	141399	483143	430182	355504	310212	340269	476287	489619	373808	264653	260222	341666	251393	270545	349465	348941	357822	231949	332619	352736	260199	199859	212687	386681	334230	366776	336156	234151	85075	388972	124732	251758	119729	166985	210093	175292	215180	246680	176216	226640	279903	453776	205275	306244	119262
MA1962.1	POU2F1::SOX2	129	1196	792	414	179	346	510	438	282	377	168	166	168	360	293	671	155	194	1319	488	251	129	109	90	120	94	129	146	323	153	218	170	176	202	137	144	69	119	123	79	160	281	173	139	121	80	328	242
MA1963.2	SATB1	298	535	1622	1660	176	635	910	884	400	723	144	532	181	790	557	521	173	198	1725	994	171	249	114	112	125	109	160	157	108	131	712	88	246	101	110	167	90	170	79	80	169	140	92	181	148	77	127	117
MA1964.2	SMAD2	0	0	0	0	0	0	0	0	0	0	0	0	0	0	0	0	0	0	0	0	0	0	0	0	0	0	0	0	0	0	0	0	0	0	0	0	0	0	0	0	0	0	0	0	0	0	0	0
MA1965.2	SP5	0	0	0	0	0	0	0	0	0	0	0	0	0	0	0	0	0	0	0	0	0	0	0	0	0	0	0	0	0	0	0	0	0	0	0	0	0	0	0	0	0	0	0	0	0	0	0	0
MA1966.2	TFAP4::ETV1	5820	14756	31583	15709	8905	36253	43399	44600	35184	44681	7270	8468	8486	45282	28018	16082	9517	8702	108635	47139	16409	10848	12883	12417	17148	12091	13697	15870	19366	15556	7363	12899	10165	9659	12919	6700	11525	9437	11585	9331	8273	11624	13026	11616	15616	7038	15123	8890
MA1967.2	TFAP4::FLI1	3240	6173	8539	7070	2461	18980	21633	23269	20786	24956	5569	4063	3234	20804	17372	6663	3951	3542	50822	24114	7022	3935	6056	4573	7247	8724	6179	6937	10480	7443	3594	8438	5286	6979	7613	5724	3825	4622	6049	4823	4249	7914	6660	3838	7708	3031	8909	6000
MA1968.2	TFCP2	7663	1308	1410	507	622	1004	1087	1072	726	1126	516	674	649	1434	937	723	1097	363	8405	1162	574	279	222	279	421	283	240	496	428	1122	182	277	250	253	782	192	205	172	276	187	214	380	359	305	557	193	557	258
MA1969.2	THRA	9221	17046	28160	21881	6596	36069	39789	41209	28142	40479	6184	9515	7560	29341	30300	12956	7456	7698	112714	43576	14309	9169	12687	8206	12265	7991	14142	17658	29051	19989	17950	17840	21429	12818	13948	17721	9899	12172	12072	8363	17574	16965	14588	12470	14063	6134	33831	10632
MA1970.2	TRPS1	384	1140	2705	1056	473	1552	1665	1569	1266	1611	616	555	681	1381	875	920	663	433	7043	1656	479	343	415	401	458	282	412	506	403	398	481	320	324	373	328	299	219	308	303	262	302	492	331	337	403	264	514	315
MA1971.2	ZBED2	1180	764	2783	462	475	1581	2058	1776	648	1916	626	690	835	1369	1116	1193	752	374	4582	1815	661	527	729	960	1029	408	832	892	583	749	309	562	487	344	608	314	443	381	378	319	396	756	666	587	796	419	1308	398
MA1972.1	ZFP14	35774	62805	168206	43690	42780	124556	156677	158587	113116	146681	68346	68476	82147	162223	94759	64004	83251	44387	466096	168714	59784	38896	51353	37886	52715	39373	55068	62777	76223	63860	34874	60232	58226	41935	72389	28295	32303	31725	41890	31284	33848	50649	48051	40808	53715	27448	82908	37821
MA1973.2	ZKSCAN3	4710	46526	32395	13986	6140	44734	53306	55673	40448	57149	9983	11753	10632	50712	66024	13188	10452	8342	97235	57911	18354	10291	16280	11955	19021	11405	17069	18637	37066	23535	6892	22463	10163	17181	23027	7276	9882	9899	17958	9652	7783	23989	20630	11451	17601	7673	28035	16005
MA1974.2	ZNF211	641	2284	8672	5905	658	2549	1950	2536	2160	3456	398	384	472	1768	1285	1176	478	468	6868	3431	590	500	284	238	362	271	333	396	464	527	5144	1509	1530	469	457	615	158	368	366	295	686	655	281	1274	397	247	865	502
MA1975.2	ZNF214	1674	3444	5676	2071	2491	2799	3138	2972	3155	3256	991	1678	1444	4056	2541	1321	908	1170	10059	2944	1280	920	919	777	928	733	899	1631	1523	1039	1186	1067	1137	1029	2053	833	702	839	822	664	1019	1246	1020	875	1051	634	1518	1017
MA1976.3	ZNF320	29705	70252	145845	75027	25998	118374	158690	145853	119982	134820	31864	50509	43979	138404	151430	53320	40295	28310	430299	160916	47898	48697	32852	27627	41938	21196	35517	43775	56759	40223	22474	34580	31318	27795	42550	19101	22425	22605	26357	19790	22338	38522	33984	27285	39175	18051	50939	23658
MA1977.2	ZNF324	2624	10189	14041	7406	3874	17959	16670	17275	15900	20866	6834	6977	6485	24554	16657	7003	6549	4378	59266	18065	6587	4459	5051	3950	6165	4543	5016	8238	9780	10356	3833	8510	5074	7820	8226	4093	3094	3960	7123	3837	3805	9668	7576	4869	5993	3272	8848	7196
MA1978.2	ZNF354A	100	600	528	292	137	250	283	263	222	224	137	139	129	227	234	272	126	118	906	334	190	110	76	67	63	63	96	73	174	106	121	119	639	101	76	46	35	46	67	54	72	123	109	66	74	76	125	111
MA1979.2	ZNF416	5255	30286	134374	13463	2878	24231	27670	25717	22952	27835	4898	5709	6245	26322	22996	10900	6481	3897	49675	26949	8705	4746	6830	4765	6940	6242	6779	9728	11546	9020	3312	9721	4372	8678	12244	3928	4000	4653	7208	4375	3771	12620	8118	5170	7648	3541	11045	8256
MA1980.1	ZNF418	1141	5127	4139	4220	1556	7363	8911	8067	7883	7550	2173	2157	3380	10562	5312	2959	2586	2247	17553	8849	3885	1609	2258	1710	2098	1648	2196	2457	2353	1860	1160	1666	1591	1577	2571	1136	1285	1467	1373	1294	1254	1878	1615	1649	2107	1363	1908	1443
MA1981.2	ZNF530	61016	213153	360321	202611	120683	348677	478541	478651	354707	410249	167873	186150	231550	442762	302083	181859	222633	130253	295185	267229	184409	109026	127370	98990	154870	89838	136195	145441	180497	145492	86462	137872	134233	92028	135895	71022	73854	80012	90775	79011	82507	115181	106618	105217	142667	71603	159266	81375
MA1982.2	ZNF574	11666	24974	24312	16990	8366	34420	43825	43247	25546	39653	7486	9312	9001	43539	28995	11755	8699	6726	84290	49900	14905	7315	9056	9172	11717	7098	9781	13576	20896	15324	5810	12092	8647	9551	14190	5865	9118	7694	9910	7395	6553	12788	11479	9380	12842	5646	15429	8487
MA1983.2	ZNF582	831	4265	6772	2829	1663	8725	9803	9209	7155	10425	3194	3216	6769	9907	5069	2203	4687	1172	18807	10552	2596	1450	1838	1374	1910	5482	1845	2111	2020	1763	1259	2108	1518	1880	2207	1283	1283	1381	1379	1332	1365	1988	1672	1444	6863	1044	2029	1623
MA1984.2	ZNF667	1138	2104	3588	4303	773	5549	5752	6091	3841	5833	1009	1318	1096	7473	2429	3879	1019	1040	9542	6633	1340	1283	1328	925	1190	897	1110	1982	1772	1489	1150	1627	1180	1438	1944	1124	724	941	1217	961	978	1722	1469	1083	1268	734	1665	1344
MA1985.1	ZNF669	3633	5549	19757	4517	4366	12754	25341	17587	11592	15223	3092	4071	3858	20110	11910	7146	4143	7989	35828	19408	10131	5399	8214	7506	12495	4845	9563	10044	13276	9245	4464	6194	7169	3975	6880	3433	6867	5587	5911	5952	5555	5784	7784	6683	10344	2991	9092	3963
MA1986.2	ZNF692	7613	19391	172658	54818	7899	45287	57604	51359	49785	65165	9715	17116	13145	54508	70121	13011	12324	11501	149721	54453	20400	18175	9474	10919	11730	7835	9764	11933	22222	15959	7243	9053	10463	9162	20050	6614	9759	10780	9476	8488	6393	11545	11650	7611	13544	6944	12786	8836
MA1987.2	ZNF701	156311	278275	395862	251891	135845	374944	273596	487509	322321	430738	210428	178776	345099	249203	330020	201226	318855	136510	345698	302932	218782	153461	190595	105405	268153	130838	212740	179997	190064	177556	134126	58116	229194	92577	155410	75431	77002	95332	91455	95303	131772	120013	108474	144608	239090	95381	207342	78463
MA1988.2	Atf3	283	1190	1302	951	354	1965	1923	2248	1532	2446	225	295	818	1680	1300	552	232	467	4480	2148	412	347	288	267	368	296	293	508	541	449	273	473	317	352	527	237	200	249	318	306	272	461	465	297	437	161	468	328
MA1989.2	Bcl11B	1920	4918	5412	2276	979	4406	4580	4422	5221	4168	1505	1680	1248	3926	3350	2390	1407	1140	16021	4776	1506	1416	1294	795	1635	1368	1188	2156	2250	1611	1597	1935	1430	1467	1661	1115	612	1042	1169	1028	1441	1833	1748	1799	1566	731	2061	1576
MA1990.2	Gli1	18562	33756	26281	20879	7500	32856	37403	35327	33516	36386	13579	16142	15713	32708	30686	16051	14612	12010	149776	38061	16878	7876	11360	6860	13352	8433	12142	17650	20055	14014	10191	10674	11731	9935	14834	8304	6455	8923	9651	8942	8447	12819	12041	9387	13890	5263	19362	9233
MA1991.2	Hnf1A	2768	4133	7492	2886	1491	4198	5141	4770	4831	4341	1716	1773	2184	5329	3711	2853	2089	1921	16523	5101	2410	1185	1178	1076	1292	1319	1227	1924	2149	1871	1159	1553	1202	1672	2183	1202	819	970	1496	994	1103	1898	1606	2125	1460	1019	2791	1627
MA1992.2	Ikzf3	4903	8420	38770	10088	4672	30775	33316	35157	27195	34800	5846	6564	6693	32270	20105	9439	6862	7566	69240	36487	12213	5714	6480	4673	5728	5011	6217	10538	8872	7022	4512	6738	5422	6002	10749	4380	4194	4663	5587	4865	4576	7286	6355	5294	7256	3652	7392	5510
MA1993.2	Neurod2	0	0	0	0	0	0	0	0	0	0	0	0	0	0	0	0	0	0	0	0	0	0	0	0	0	0	0	0	0	0	0	0	0	0	0	0	0	0	0	0	0	0	0	0	0	0	0	0
MA1994.2	Nkx2-1	591	1027	2191	494	339	1428	1292	1669	1401	1473	351	331	585	1410	1094	650	385	344	3763	1906	591	248	182	170	301	198	198	308	280	963	242	236	244	235	356	231	153	201	220	189	225	268	209	269	289	181	301	210
MA1995.2	Npas4	2072	649	3211	757	653	1383	1992	1893	873	1551	359	657	542	1401	1005	561	462	457	5614	2082	736	282	417	436	713	312	565	611	663	706	377	429	661	261	392	486	484	632	321	380	497	374	476	356	637	276	527	217
MA1996.2	Nr1H2	0	0	0	0	0	0	0	0	0	0	0	0	0	0	0	0	0	0	0	0	0	0	0	0	0	0	0	0	0	0	0	0	0	0	0	0	0	0	0	0	0	0	0	0	0	0	0	0
MA1997.2	Olig2	0	0	0	0	0	0	0	0	0	0	0	0	0	0	0	0	0	0	0	0	0	0	0	0	0	0	0	0	0	0	0	0	0	0	0	0	0	0	0	0	0	0	0	0	0	0	0	0
MA1998.2	Prdm14	974	2899	6186	4439	603	5294	5544	5489	3461	6478	637	1586	680	7221	4869	1289	869	904	17075	5655	936	1984	1274	778	1218	629	1461	2428	1794	1533	18995	1124	14308	783	1875	5420	1066	3289	693	1016	11778	1166	866	2274	1452	742	1984	714
MA1999.2	Prdm5	4756	24813	17284	10600	5363	20477	26607	23989	17891	24143	11123	10338	15574	26855	18357	12133	14479	6336	72229	25377	9358	6971	7650	5879	8431	10055	7590	12438	10306	9257	5785	9362	7093	8656	10486	5864	4644	5723	7884	5787	6617	10565	8548	8472	13549	5447	13313	8041
MA2001.2	Six4	561	1696	3106	1380	490	2202	2256	2239	1505	2154	665	941	800	2721	1809	982	778	537	7324	2497	770	488	499	584	526	400	550	749	1210	903	678	823	723	635	1066	556	252	596	526	502	708	722	598	408	681	345	1066	670
MA2002.2	Zfp335	3297	5580	16800	7646	3396	18440	22029	19752	30162	23578	3653	3852	3979	24611	14420	10300	4546	4165	50183	21784	8491	4986	6604	5229	8362	5587	6633	8386	8168	5947	2747	6560	4177	5591	7701	3022	3223	3813	4974	4209	3381	6567	5537	5234	7981	3502	5787	5149
MA2003.2	NKX2-4	2440	5834	7701	2994	2078	16549	19989	19236	10874	18580	3216	3652	3722	14296	10912	4157	3377	2669	26901	20715	4089	1790	1505	1252	2029	1640	1515	2686	2539	2374	1651	2091	2089	2025	2651	1740	1024	1558	1834	1585	1705	2448	2064	1850	2115	1208	2394	1668
MA2093.1	HOXB1	378	479	1579	1553	150	508	517	1042	435	765	181	154	170	380	366	193	164	162	1885	1413	179	109	220	134	161	106	262	301	247	239	643	181	438	140	161	301	91	147	146	138	351	217	164	161	206	94	350	102
MA2094.1	PAX8	1326	845	4371	1502	547	3288	4264	3597	2500	4193	926	1000	1126	2904	2935	1068	1018	769	9231	4230	1867	1152	1582	1497	2335	954	1808	2047	4866	2053	981	1378	1617	929	1500	706	1560	1319	1334	1329	1210	1313	1786	1523	2087	665	2187	904
MA2095.1	Sox7	1417	7432	6570	3556	1477	4708	5613	5150	3563	4735	1607	1717	1628	4995	4074	2808	1605	2069	19689	5471	2036	1836	1322	660	1087	875	1409	1829	3191	1844	2888	1974	2793	2088	2680	2488	866	3014	1291	1212	2935	2187	1718	1675	1440	676	3179	2058
MA2096.1	ZNF524	15237	43176	97006	31637	16324	80407	105617	101007	53370	101260	19575	26255	22243	87115	55948	29527	22136	17558	214399	111219	30503	17751	22566	18958	30218	15431	24917	41242	30426	27460	16890	20353	22461	15517	28335	14129	13668	17164	17821	17390	17169	21452	20751	21316	32233	12362	33261	14143
MA2097.1	ZNF75A	7048	25266	26352	43890	7142	27826	31767	29665	26331	30252	10471	10767	13924	39779	19648	12248	12679	7547	99736	35520	11824	7042	7695	7042	9352	6687	7550	12546	15682	12487	6568	11090	8463	10841	22141	6305	5572	5735	8993	5788	6450	14443	10784	8243	9231	5604	17651	9299
MA2098.1	ZNF766	1344	3542	5731	2630	1406	5405	5320	5437	3766	5950	2120	1865	2387	6100	3653	3025	2638	1484	16641	5714	2086	3368	1529	1369	1992	1565	1659	2696	2910	2352	1558	2364	1234	2259	2464	1018	989	1024	1724	965	1449	2792	2340	4198	2093	1112	3213	2104
MA2099.1	ZNF770	7724	17734	22806	11729	17864	35075	50875	44214	33805	38829	11411	13363	14803	48440	40068	22708	14962	15385	105942	49610	27817	12117	17493	14923	22669	11318	19215	23068	23680	16391	10088	11430	15458	9054	13769	8109	15827	12155	12252	12793	11563	12810	14927	13651	20652	7562	16111	9271
MA2100.1	ZSCAN16	765	2249	3742	1876	500	3495	3956	3821	2920	4280	653	783	813	3176	3599	1170	694	669	8434	4122	1236	677	1003	695	989	733	929	1221	1525	1045	673	1117	647	901	1235	841	540	602	897	638	626	1066	1017	747	1036	549	1211	893
MA2101.1	ZNF677	697	3815	2799	1837	849	3442	4577	3561	3539	3726	1312	2787	1410	3890	2832	1657	1342	1435	9450	3738	1692	849	1002	894	1001	820	946	1395	1455	1067	759	1259	822	1066	1257	687	686	703	988	743	690	1355	1209	876	1046	784	1331	998
MA2102.1	ZBTB17	94	178	470	76	68	186	476	278	114	142	178	148	182	198	144	120	178	76	662	244	94	42	50	34	66	28	52	68	100	100	60	70	74	48	80	76	32	78	28	50	98	86	58	36	48	38	104	76
MA2117.1	FOXP4	2070	1240	1640	534	309	961	1023	893	921	1044	221	207	305	721	644	588	230	314	3814	893	314	232	190	207	243	214	199	281	260	237	243	222	813	200	256	331	226	199	178	240	359	235	287	227	333	140	280	162
MA2118.1	FOXS1	2062	1225	1631	532	306	950	1016	885	911	1033	213	204	298	710	636	581	226	312	3799	885	311	229	188	205	240	213	197	277	260	236	238	222	811	198	254	331	226	198	175	240	358	232	286	227	328	140	279	161
MA2119.1	HOXA3	378	479	1579	1553	150	508	517	1042	435	765	181	154	170	380	366	193	164	162	1885	1413	179	109	220	134	161	106	262	301	247	239	643	181	438	140	161	301	91	147	146	138	351	217	164	161	206	94	350	102
MA2120.1	ZNF184	3037	10479	14729	8257	8437	20191	25246	24384	20975	23479	9481	8732	13170	29355	20387	11095	12260	7573	69477	25232	10751	5687	6797	6045	6777	4608	7393	7344	7605	9696	4893	6982	6279	6135	8764	4807	4674	4775	5912	4426	4717	8226	6323	5871	6204	5374	8400	6110
MA2121.1	ZNF213	22363	78968	74189	70405	14531	129040	177178	168778	122997	155363	28961	39830	34139	145031	143187	35863	33249	23790	275895	186982	58399	37853	62472	58945	85397	37626	69618	69373	98863	82018	23849	56482	41929	42564	63043	21181	50705	36678	54727	38269	30248	57503	68671	47974	78317	24758	81403	42246
MA2122.1	Ebf4	11574	35262	76303	86682	18018	116225	122947	103302	63042	164275	13918	39842	19718	97076	79142	32144	19508	14089	237062	118935	30799	22638	39083	25635	41607	26817	41804	60140	52093	47735	14135	41598	22788	33742	47001	16238	26322	22287	33297	18490	16418	44673	41867	25085	46166	16536	59230	27906
MA2123.1	Hand1	18846	24872	238220	17018	6875	43590	45744	48893	38887	50480	7827	8644	7901	59003	36968	10107	7525	6699	86811	48886	13859	9017	11254	8120	12179	15724	11628	16725	20503	15711	8721	13881	10666	11383	15184	8299	5930	7659	11184	7680	8532	15098	13543	9842	14531	6001	19312	11290
MA2124.1	Hmga1	345	2180	3202	660	606	651	1389	2348	918	733	366	431	459	1197	916	960	425	521	5048	2299	376	180	256	202	274	187	302	295	1504	341	292	397	188	516	909	152	123	140	246	134	269	1168	490	195	254	166	1455	430
MA2125.1	Zfp809	14283	25370	44474	33881	21873	108227	124663	128750	91878	128954	31776	26954	24293	123211	86770	62344	24897	18567	226151	137650	43601	25197	29581	22606	34303	23329	30083	42934	60739	53809	22989	52382	28988	45449	56589	22459	19609	23004	40692	23046	22424	53446	44182	26640	33219	16669	61039	41084
MA2126.1	Zfp961	8719	15914	23054	12554	6170	31160	49913	42325	16323	33692	5026	7424	7354	34756	16733	17097	6571	9552	71909	51485	17896	7839	11685	16565	13680	5232	13886	11409	15586	11310	7119	7951	10503	5372	7775	4542	19226	7786	7089	7978	9302	7144	10181	9872	12895	5386	12755	5506
MA2323.1	Pgr	247	1257	1242	1079	336	1683	1892	2035	1279	1941	374	721	362	2153	1200	1059	373	568	4832	2302	653	512	489	410	573	482	463	850	764	656	410	702	401	585	877	885	442	443	599	344	477	660	602	642	554	331	644	621
MA2324.1	BCL11A	7922	15603	39888	18215	6485	44000	44668	47449	33999	57531	5782	8274	5980	38352	37384	11544	6881	7827	86681	49801	9627	7385	10193	5494	10330	8044	10355	12488	22240	14935	11381	14522	14704	11240	15555	11982	3967	9641	9607	8209	12996	14167	11925	9261	10883	4433	21324	9293
MA2325.1	EPAS1	1109	3527	5330	3184	596	3613	5374	5946	3871	4307	989	1160	2030	6559	3258	1500	1174	1286	15327	6494	3240	1336	2719	2602	3125	1355	2975	2529	1833	2191	1357	1629	2440	1134	1964	1537	2707	2224	1438	2094	1895	1676	1899	1642	2780	1263	2088	1020
MA2326.1	IKZF2	0	0	0	0	0	0	0	0	0	0	0	0	0	0	0	0	0	0	0	0	0	0	0	0	0	0	0	0	0	0	0	0	0	0	0	0	0	0	0	0	0	0	0	0	0	0	0	0
MA2327.1	PGR	1110	3496	5574	2732	450	4366	3926	4176	3604	5152	488	516	402	4032	2276	1412	378	788	8602	4434	934	704	1040	704	1016	972	874	1586	1738	1542	712	1484	810	1266	1736	682	702	668	1044	732	678	1268	1378	926	1412	626	1476	1150
MA2328.1	ZBED4	30251	86708	112973	50550	49333	167452	359494	278441	112390	202257	50631	58767	79064	192064	171688	123485	84445	100275	412842	331756	128211	69066	88951	91984	161621	37864	110400	84993	180835	126762	60593	58107	102328	29215	75271	31481	92981	75263	71368	87336	79562	52178	99014	96878	121885	35417	126472	38464
MA2329.1	ZBTB11	9433	5150	13333	5378	3441	17199	22871	22593	12471	18751	3696	3702	4070	19180	12541	5636	4176	4293	45556	23884	8232	4731	3017	3193	3492	2155	3186	4797	5745	4673	3030	3837	3648	2813	5410	2439	2701	2957	3170	3225	3131	3955	3839	3407	3764	2002	4667	2564
MA2330.2	ZBTB24	7822	9664	59152	8996	3921	32924	36910	33582	27710	38864	5915	7627	6133	32362	46197	9387	6404	5199	74195	37830	10987	7329	9151	7287	11055	6942	9712	13129	18779	15838	6654	10429	8674	9421	14249	5868	6399	6102	8941	5881	6618	12220	10197	8568	11612	5638	17334	8102
MA2331.1	ZNF157	556	9794	3752	1985	452	2193	2742	2506	3147	2341	561	707	671	4136	2246	880	761	706	8132	2476	855	1696	527	472	684	533	564	712	708	554	518	745	633	529	624	429	308	469	505	467	456	757	545	568	834	377	668	511
MA2332.1	ZNF175	3187	5510	22453	8246	2918	17691	18779	19201	14724	20122	3519	3542	3854	19487	12148	6516	3912	4783	37703	19719	8175	3235	3107	2718	2856	2519	3645	4505	4094	3557	2609	3320	3040	2880	5748	2249	2477	2559	2780	2576	2556	3554	3222	2845	3360	2176	3596	2661
MA2333.1	ZNF35	178	721	892	1015	211	447	830	551	295	565	210	200	233	537	331	460	257	322	2087	533	316	49	72	77	92	63	71	91	168	94	120	110	69	117	156	89	46	62	62	50	91	150	120	69	119	68	173	129
MA2334.1	ZNF547	411	2226	1966	1816	713	2790	4187	3144	4210	3250	883	939	859	3038	2018	1197	840	890	8388	3339	1231	562	738	658	867	571	729	854	836	754	517	710	575	762	774	478	522	574	554	538	486	814	669	597	718	487	766	713
MA2335.1	ZNF558	85	296	436	87	65	143	173	144	147	177	49	51	82	134	117	133	64	77	597	154	75	42	42	30	57	45	40	67	54	42	38	48	33	44	51	43	19	39	43	28	45	73	64	54	38	27	76	49
MA2336.1	ZSCAN21	1463	1490	861	948	329	2463	2637	2528	2971	2595	454	565	547	4161	1619	971	566	471	5047	2787	731	586	498	433	600	436	510	678	625	552	427	557	507	469	574	413	298	476	399	498	490	679	460	555	583	407	502	427
MA2337.1	Nr1h3	0	0	0	0	0	0	0	0	0	0	0	0	0	0	0	0	0	0	0	0	0	0	0	0	0	0	0	0	0	0	0	0	0	0	0	0	0	0	0	0	0	0	0	0	0	0	0	0
MA2338.1	Ppara	1090	2042	2138	833	992	1559	1884	1860	4370	1712	921	1775	1051	1738	1675	1154	948	1192	5280	1923	959	502	535	433	654	477	489	1085	872	750	495	723	717	576	1496	553	322	521	578	443	658	875	813	466	680	364	894	587
MA2339.1	Nanog	289	708	1779	743	326	1716	1352	1775	1846	2186	388	327	297	1620	1116	444	294	571	3932	1882	974	210	166	190	232	186	185	301	243	203	176	202	210	207	209	147	111	172	195	177	184	249	206	247	217	168	188	213
MA2340.1	Zbtb2	8819	4693	19125	4778	3046	13288	19129	17898	8645	14924	3183	3338	4036	14897	12320	4733	3600	3814	42238	18548	6432	4694	3398	3163	4481	1929	4072	4527	6203	5142	3028	4007	3493	2262	3594	2209	2722	2777	3491	3062	2821	3615	4186	3547	3855	1895	6343	2054
MA2341.1	FEZF2	24867	83182	99001	104590	29191	211996	248501	258816	217537	251973	37387	45705	39222	222750	175586	101617	39889	33742	352710	273608	70295	47593	72495	46833	78167	50063	74650	88661	114557	85067	40759	84427	53242	71109	85182	39129	36580	48397	66522	48137	41238	88173	72991	54146	73558	31925	92524	64963
MA2457.1	ZNF260	183	949	851	602	189	651	603	804	897	719	172	160	152	702	520	798	150	229	1936	740	280	169	133	119	1646	132	132	256	181	186	814	177	661	150	249	377	100	268	120	154	514	180	156	184	167	112	183	176
MA2458.1	ZNF146	130	449	975	473	189	387	375	464	406	343	207	235	254	343	353	514	208	213	1580	442	284	78	55	77	84	82	61	107	78	74	213	83	140	71	101	109	42	62	65	49	120	116	95	84	86	64	83	87
MA2462.1	ZNF250	405	3501	3773	593	550	978	2217	1129	1195	987	410	624	455	937	1022	948	424	644	3177	1146	531	467	340	426	581	376	329	468	513	433	267	533	266	404	508	190	189	217	340	172	219	488	493	520	556	342	592	390
MA2469.1	FOXM1	2070	1240	1640	534	309	961	1023	893	921	1044	221	207	305	721	644	588	230	314	3814	893	314	232	190	207	243	214	199	281	260	237	243	222	813	200	256	331	226	199	178	240	359	235	287	227	333	140	280	162
MA2470.1	ZBTB48	6571	8222	12146	4284	3022	17800	16479	18222	10791	20253	3069	4242	4009	16701	14388	4531	3426	2859	57291	19405	4248	2803	3421	2301	3898	4081	3469	9636	10436	6196	2030	8189	2711	6132	7897	2398	1879	2118	4817	2341	2391	7460	5584	3022	5514	2072	9516	5765
MA2484.1	Dmrtb1	327	1298	4190	10079	348	593	949	1220	1276	604	200	213	210	653	494	325	202	243	2496	3701	240	159	106	92	160	93	111	156	132	137	122	129	124	107	157	120	64	90	128	81	142	125	116	128	118	113	133	74
MA2485.1	Duxbl1	290	730	1173	474	461	842	746	891	616	987	943	320	1507	942	595	415	3080	262	4002	929	344	245	150	123	170	116	137	236	446	270	490	268	445	288	240	195	79	154	288	124	262	341	255	210	158	102	480	303
MA2486.1	Fosb	283	1190	1302	951	354	1965	1923	2248	1532	2446	225	295	818	1680	1300	552	232	467	4480	2148	412	347	288	267	368	296	293	508	541	449	273	473	317	352	527	237	200	249	318	306	272	461	465	297	437	161	468	328
MA2487.1	ZBTB21	0	0	0	0	0	0	0	0	0	0	0	0	0	0	0	0	0	0	0	0	0	0	0	0	0	0	0	0	0	0	0	0	0	0	0	0	0	0	0	0	0	0	0	0	0	0	0	0
MA2488.1	ZBTB40	136	910	1266	1790	278	377	424	456	308	390	303	199	253	782	344	584	245	219	1486	473	165	81	144	91	140	101	149	139	157	97	92	97	106	123	103	72	52	63	98	59	84	129	122	118	99	96	142	83
MA2489.1	ZFP28	888	11492	6336	1118	1694	2105	2509	2156	2318	2224	2386	1356	3153	2459	1811	2647	3312	1877	6513	3024	1733	1121	1414	1319	1773	1027	1497	1622	1613	1049	873	2668	898	1209	1228	661	759	822	903	666	919	1383	1016	1888	1169	1255	1631	1043
MA2490.1	ZFP3	1626	3227	6141	5472	1651	11038	10834	11557	6324	11823	2000	2251	2006	14428	6045	2520	2221	1965	24988	11881	1750	1194	1235	1025	1569	1312	1281	1888	2303	1810	1124	1633	1137	1552	2050	1067	841	1026	1356	982	966	1980	1525	1308	1664	918	1839	1482
MA2491.1	ZNF134	2105	5073	9366	4993	1480	9846	12089	12377	10701	13968	2149	2538	2919	9753	10117	4035	2787	2585	29667	12399	3853	2446	2665	1844	2544	1970	2792	3494	3758	2952	1715	2834	2158	2625	3705	1597	1338	2027	2301	1833	1752	3304	2731	1944	2739	1379	3187	2513
MA2492.1	ZNF18	8587	7397	13664	7734	2441	12133	16226	13700	11846	14352	3610	6285	4400	14645	9736	4841	3804	3284	37620	14884	7002	3393	3457	2408	3844	3072	3291	5846	6429	5798	3347	5839	4686	4571	5877	2941	2027	2766	4379	2920	2898	5375	5256	3978	4610	1906	6646	4392
MA2493.1	ZNF322	1927	11537	10583	7109	1460	15122	17300	16593	17213	17750	2421	2831	2257	19441	26763	3907	2359	3170	34634	17739	5207	3613	5245	3903	4825	3607	5266	5480	6352	7954	1836	5379	2779	4600	5714	2115	2986	2900	4061	2612	2080	5673	4659	3597	4995	2535	5114	4168
MA2494.1	ZNF436	22867	40976	59685	30147	17913	80463	102843	97384	57082	108450	19719	25878	29547	101681	62184	46580	27140	20713	239710	111856	39346	17009	26508	18895	30860	22220	28390	35992	34434	27358	14183	18061	22016	15463	24683	13266	17618	16095	16481	16609	15579	20609	19923	17955	35988	12869	24554	13914
MA2495.1	ZNF490	1156	3776	6859	2468	773	6877	7617	7234	7767	7850	1201	1583	1323	7495	6913	2950	1302	1754	17161	7612	3450	1435	1742	1324	1824	1525	1745	2427	2130	2170	1354	2074	2030	1743	2013	1414	1004	1347	1747	1443	1314	1977	1822	1452	1943	1036	1992	1694
MA2496.1	ZNF596	10353	42624	79722	16008	22365	39639	48777	51533	27988	50456	44926	39466	56194	48075	23251	35437	56204	29373	138103	58382	28553	10534	12531	16062	19235	9166	13725	16287	18294	17421	8168	14953	12137	8733	16479	7011	12722	10019	11923	9827	9232	12995	14008	11320	16177	10282	18161	8914
MA2497.1	ZNF623	3857	13214	27474	46709	6484	38232	42847	43446	31962	44350	5353	9113	6471	37722	30968	9308	6644	5322	75134	48206	11381	6906	9856	8288	10654	6567	10399	11718	12178	10323	4351	9135	6192	8339	12863	4566	7010	6631	7581	5603	4722	10401	9267	7940	10646	5184	11182	7749
MA2503.1	Banp	318	298	2968	374	636	2000	2618	2260	1210	2260	552	760	1160	1976	1298	2152	1638	562	3604	2616	1704	940	1142	2302	1962	890	1506	1162	2378	1746	652	1108	1152	612	1236	408	2410	1048	1160	1124	896	1136	1604	1300	1920	752	1948	510
MA2504.1	BCL11A	1316	3023	1601	1129	1060	2234	2208	2273	2102	2350	607	710	661	2158	1703	1006	817	553	9628	2284	805	783	616	345	491	461	605	1087	843	650	502	535	522	544	816	412	313	406	416	355	415	777	673	753	630	347	868	565
MA2506.1	MYT1	271	2033	697	629	558	2529	1904	2314	888	2730	599	460	901	1803	1409	1106	1156	506	3358	2491	1246	191	343	267	355	212	351	419	503	286	226	326	208	330	368	306	151	203	264	168	265	537	388	208	298	230	547	289
MA2507.1	NACC2	93	1135	681	289	116	227	292	281	451	213	339	343	304	261	179	132	324	52	1252	284	238	56	60	75	91	68	60	132	60	37	57	75	70	57	63	69	65	123	28	38	88	52	50	75	151	65	37	48
MA2508.1	CASZ1	2258	13516	8741	4217	3202	8055	42778	9944	4099	8110	3798	4394	4609	5618	6077	4210	4073	2151	18106	11156	2128	2895	5524	2033	3444	1990	5693	6764	48656	12492	10228	10395	14493	16254	20215	5403	2014	2307	4636	1702	11747	42492	16393	5445	4718	1457	86872	11313
MA2509.1	ZBTB5	1483	5436	12640	2480	3789	9133	11733	11155	7390	11781	1940	3733	3699	8432	7705	2961	2724	1888	42330	11654	3167	2340	2145	1971	3305	1820	2232	3915	6706	5524	2072	5569	2152	4185	5314	1810	2000	2561	4396	1653	2020	5232	4821	2543	3032	1238	7093	4144
MA2510.1	ZBTB41	361428	266677	397505	279445	241967	460518	366330	322004	341713	282070	304958	311249	253173	447615	384349	407778	478108	270836	353065	397330	423454	298237	394671	226405	271013	195542	443746	405853	446555	409705	322731	5225	253457	179653	330727	170846	179246	211370	202329	219098	281982	253804	260745	328644	437958	168993	498344	149390
MA2511.1	ZNF335	8927	23614	52637	14823	7432	42301	38410	40145	29830	45102	7497	13193	9727	30130	31948	12225	9962	6510	90421	46839	14858	34458	11189	7730	13069	6651	12455	15741	17503	12866	20693	8420	20820	7645	15268	11975	6326	8641	7220	7162	15310	10557	8797	9901	12805	5614	17495	6331
MA2512.1	ZNF648	69787	329073	387105	162828	128362	391336	253849	258409	398601	460987	206346	211281	259905	259406	341010	239288	259710	154490	225351	283426	196959	105395	119125	107471	141854	100095	128046	138863	147010	127358	90369	116909	143338	78014	126210	72116	64459	76531	76893	77631	86536	94674	88079	108055	139060	88882	147106	67534
MA2513.1	FLYWCH1	146	692	1035	316	345	387	445	441	487	417	700	564	924	605	516	403	842	478	1974	423	458	181	210	159	197	121	216	310	318	240	416	260	284	252	304	234	129	302	171	184	328	287	193	286	197	195	326	216
MA2514.1	ZNF853	431	941	2063	783	459	2576	4428	4130	1282	2827	674	648	2234	2559	1423	1907	999	763	7859	4367	1624	662	891	1127	1004	519	964	743	1115	738	492	487	775	373	630	577	1086	806	480	732	650	651	566	717	1019	555	684	340
MA2515.1	ZNF865	6884	34729	35198	11733	6972	29520	41578	39645	27716	34787	7376	8836	10448	34457	17149	9873	9834	10159	95148	44377	18218	5885	8290	7589	10432	5891	8332	10239	8562	9614	5280	7181	7212	5308	8434	4349	5643	5816	5771	6008	4981	6302	7081	6682	9778	4616	7971	5009
MA2516.1	ZSCAN2	2392	3576	6371	6678	1780	9159	9456	10201	8740	11098	2075	2478	2284	11619	7212	2337	2433	1596	31986	10440	2940	2046	2253	1552	2466	1809	2409	3743	6283	4363	2125	3578	2804	3122	4966	2052	1331	1850	2575	1717	2169	3970	2870	1975	2904	1254	8086	2624
MA2517.1	ZSCAN25	46234	174899	295337	127365	70580	287641	350736	353922	284332	340511	105281	122647	128135	353012	217453	125857	123743	77709	450232	385265	111259	69505	79177	63686	96438	62608	81376	104885	95457	85035	58060	77186	77819	67780	91887	53392	43243	54177	62776	54273	56953	80283	71097	68937	89551	53230	87683	60818
MA2518.1	ZNF551	1479	8514	10185	3736	1806	6088	8044	6720	4408	6558	1937	2448	2027	6185	3981	5011	2190	1214	18075	7537	1575	1884	1764	1192	2894	1860	1867	3311	10528	4355	4089	2948	2772	3273	3864	1372	692	1042	2227	869	2394	6297	4048	3353	2392	919	11687	2873
MA2519.1	ZNF606	4520	17288	26716	12002	9015	32595	37173	36537	22377	41294	10807	10822	13727	38790	23836	34071	13302	9210	97565	40918	13742	8891	12430	10598	14506	9362	13017	21928	17958	14323	7564	11858	11818	9194	13886	8527	9675	9676	10553	7839	8870	12767	13073	9179	14594	6602	18443	8041
MA2520.1	ZNF678	9147	14220	20700	31120	8831	32300	35789	36326	31063	38803	10517	12584	12226	39500	33895	12211	12653	10230	110106	42982	11067	6182	7002	5519	8559	6015	7065	10426	8908	8197	5833	7430	7810	6562	11334	5545	4356	6511	6030	6395	5705	8716	7370	6539	8337	5342	8868	5907
MA2521.1	FIZ1	777	4988	4396	1420	773	5078	4900	5009	3291	5954	810	914	1260	4651	3302	1756	1121	1044	11446	5621	1759	889	1016	710	992	672	1081	1396	1928	1573	667	1604	643	1161	1494	693	551	660	1025	599	712	1628	1382	947	921	472	1775	1119
MA2522.1	ZNF683	8695	38724	80915	36053	23540	43714	48552	47904	43925	48413	44530	36619	54604	66904	31687	32234	54221	23841	170692	50184	25330	15695	15622	13040	15447	11920	16641	18223	18796	19666	13129	23980	16436	15089	19894	10973	9654	13637	13151	10163	12650	18257	13649	13705	15783	12190	21748	13422
MA2523.1	ZNF689	385	896	1776	1085	327	2124	2232	2516	779	2183	437	711	498	889	1840	736	486	359	3648	2801	547	216	200	218	283	156	182	318	211	224	308	176	249	270	188	179	148	183	140	177	209	232	176	229	209	190	192	296
MA2524.1	ZNF696	3935	4467	9651	6252	3613	10571	13823	12640	10731	11808	3658	3226	4734	13426	7958	4325	3915	2634	30336	14002	3812	3879	2853	2026	3254	2557	2948	5996	3654	3325	2813	2965	3465	2651	4540	2684	1560	1843	2392	2084	2452	3192	2705	2894	3312	1613	3517	2393
MA2525.1	ZNF699	6304	15281	31453	11788	7291	32876	38493	35097	32052	36931	9653	11471	11567	40349	23893	13642	11487	8949	133090	38717	11897	9683	8826	7202	10754	7918	9063	14460	11830	10163	7102	10155	8407	9060	10616	6718	5828	6418	8260	6428	6798	10489	9020	9394	11442	6671	11418	8401
MA2526.1	ZNF721	677	8363	2188	972	1319	2075	1930	2479	2116	2022	1395	2696	1653	4210	1562	1600	1615	848	6820	2684	990	606	725	694	760	559	694	976	969	773	405	678	455	696	1604	443	427	431	621	366	498	847	841	631	910	583	895	638
MA2527.1	ZNF726	529	1787	2741	1290	832	3336	2408	3557	2163	4288	1030	863	1617	3959	1774	1412	1128	877	6831	4062	1219	668	686	666	845	655	669	927	1422	942	595	1160	1051	1289	1271	545	401	571	796	524	612	1970	942	666	847	555	1349	1121
MA2528.1	ZNF732	5822	35478	34296	21459	6177	40213	53664	49788	37851	49079	5201	7677	6478	47535	40160	12263	6905	7529	88746	51958	14002	10414	12401	10195	14207	10177	13052	22290	26690	19438	6597	21991	10347	14241	18288	6673	10454	9328	13489	8786	7554	17336	16281	10844	15449	6210	20466	12469
MA2529.1	ZNF772	232	474	698	511	135	798	747	849	878	824	237	177	186	602	595	354	188	171	2477	950	213	77	95	82	88	82	88	117	83	93	103	96	78	66	86	80	41	71	63	66	114	99	76	67	130	72	72	61
MA2530.1	ZNF773	2833	11593	7609	7648	3398	19670	19691	19878	13166	21854	4553	6626	6019	31655	19187	29188	5848	3526	48350	21634	6501	5647	5477	4380	6196	4609	5732	8554	10504	7550	3922	8015	4706	6885	8116	3626	4433	3855	5656	3698	4439	8237	7166	4761	6612	3269	10249	6089
MA2531.1	ZNF775	19913	106444	154851	52280	49770	137977	165496	164984	128002	159710	78585	70776	100139	189288	104083	73194	100753	50511	489250	178947	50235	39685	42352	36744	49355	29791	43044	55442	53513	46237	32262	39628	40640	34694	56526	29191	25526	30477	32096	28123	31977	43549	35673	43025	43720	32217	50148	32085
MA2532.1	ZNF780B	1741	3116	2900	1645	798	4448	5123	5185	3093	6113	2221	950	1172	4678	3202	2131	903	1189	8007	5023	1876	842	1101	1157	1277	1464	1125	1346	1259	1208	661	1115	859	912	1206	694	630	736	950	724	670	1150	1077	820	1303	829	1268	934
MA2533.1	ZNF814	13953	61338	85783	58828	36846	97432	127802	120382	90218	108966	57153	67082	72242	129196	74921	50426	70568	42475	394206	134182	39652	56964	27817	22981	34865	21095	29294	39735	40172	35866	21659	28461	26847	24999	39497	18363	17064	18493	24285	19130	20256	31772	28709	25637	32257	18029	39717	22109
MA2534.1	ZNF831	14320	20598	22625	40412	5875	32036	43080	38357	23165	38012	6674	8254	8936	34429	27300	20146	9769	6043	142064	43065	16993	6736	8928	7706	13908	8095	9396	14240	22471	18892	5578	17092	7274	13451	19078	5333	7311	6994	13279	5860	6562	17409	17173	8014	10947	4917	24249	11407
MA2535.1	MYPOP	1289	7988	4190	2844	977	2224	2641	2628	1586	3124	791	2246	839	2861	7634	3971	704	977	7374	2817	2171	560	2475	774	681	372	2569	637	667	590	512	518	784	361	414	440	646	537	426	473	563	488	541	712	731	391	578	321
MA2536.1	PRDM13	20010	24505	56683	33110	16227	79085	97508	93550	79228	95781	18770	37505	23996	98176	65371	38862	23358	20187	243562	99868	33479	17588	28032	18795	29091	19137	28179	33389	32855	24688	14583	21601	18420	17534	23129	14069	14682	18046	17881	17947	15484	22039	20879	20134	27176	12537	23363	15813
MA2537.1	SALL3	116	715	1619	1027	130	331	490	416	517	332	153	120	134	297	234	278	113	117	1202	478	141	63	57	70	75	43	54	57	58	43	96	39	58	41	57	97	36	33	43	31	53	48	61	93	111	67	54	40
MA2538.1	CGGBP1	4010	19732	31904	10028	11571	35990	80894	57679	22221	43449	13993	16199	22412	34306	38017	40867	32625	29430	109952	74257	37270	28460	36277	47115	74935	11900	48355	38468	65931	52004	23679	18940	39284	8190	27805	8492	42321	29213	31358	36714	35019	19384	45214	41602	53593	11049	53424	16081
MA2539.1	SLC2A4RG	14216	40036	65476	40274	17864	63843	155386	122598	45812	95473	22213	24491	45364	83655	89172	67806	32751	65023	255184	151674	85951	47841	68145	83433	133990	24960	89153	66514	138052	107298	41034	44578	68383	20653	59672	15745	80154	51207	66351	62596	57620	43362	91891	71320	102418	21558	109746	34358
MA2540.1	SP140L	0	0	0	0	0	0	0	0	0	0	0	0	0	0	0	0	0	0	0	0	0	0	0	0	0	0	0	0	0	0	0	0	0	0	0	0	0	0	0	0	0	0	0	0	0	0	0	0
MA2541.1	CREB3L3	2084	4129	6354	3290	1301	7054	15997	8461	7768	8111	1589	2747	2468	10136	7903	2725	1877	1684	25104	8897	4614	1687	3995	3305	3777	2121	4290	4750	11752	3594	1826	2811	3208	2274	3424	2948	4433	3679	2432	2861	3356	3185	3013	1978	4407	1700	4074	2129
MA2542.1	SCAND3	2347	9837	6805	4962	2989	14508	19189	17495	17562	15987	6606	15247	8087	26207	20205	6213	7778	3073	38719	18331	8673	3926	4176	3133	5473	3714	4003	6516	6470	4977	1901	4529	2657	4320	4450	2527	2712	2656	4150	2434	2311	5250	4678	3491	5423	2345	5000	4046
MA2543.1	ZBTB47	1055	3177	10332	4171	1318	4103	4419	3802	2838	3733	2289	1139	1084	3705	2826	2095	1164	934	11209	3954	1222	1107	1886	720	903	708	1219	1160	1511	1031	2513	1273	1349	1196	2616	797	632	716	833	659	872	1596	1148	1069	1449	589	2060	1097
MA2544.1	ZKSCAN4	103	422	1261	988	128	459	488	469	586	1127	162	371	157	481	327	267	184	126	1678	482	207	198	156	89	151	112	159	209	332	215	297	354	153	185	322	150	72	142	118	106	210	293	170	137	187	99	403	222
MA2545.1	ZNF57	4639	16571	24177	12139	5115	21653	27222	26999	21054	24639	6806	6768	7785	28428	16334	9089	7517	5010	90593	28565	7166	6048	4339	3927	6435	4027	4540	6367	6131	5134	3309	4350	4420	3799	6016	5166	2470	3912	3625	3110	2999	5100	4518	4230	5813	3169	4851	3555
MA2546.1	ZNF131	189387	189209	246628	174328	158185	221322	312352	337154	143412	217974	148529	55927	277869	341945	281845	170978	229476	135412	399947	307029	283387	169551	204192	179646	426150	93055	249798	140662	258496	234146	111216	67896	221232	37348	109561	30200	183920	117714	112040	132263	155770	70926	162999	172037	307799	90550	212917	58317
MA2547.1	ZNF215	19711	41912	87022	46371	11858	106232	131215	139978	96233	125886	22342	39683	26079	117557	66469	46638	27681	21703	312055	147956	36310	25914	31936	21802	35050	21278	33082	34801	31935	29174	16087	25108	22994	20055	29972	15232	17084	20516	20285	19741	17363	23711	23698	24567	34663	14779	28396	18449
MA2548.1	ZNF226	1542	10091	10044	7835	1699	5473	6311	5130	3206	5472	2257	2193	2595	4613	3190	2723	2587	1683	17240	5843	2692	1204	1169	938	1217	886	1230	1508	3206	1973	2501	2476	1719	2036	3290	1066	821	1020	1305	903	1463	3087	1751	1342	1358	910	4091	2010
MA2549.1	ZNF234	3862	22488	24342	12090	3421	12324	13336	10462	6920	12316	6651	5768	7789	9843	5717	5695	7934	3232	39018	10561	3293	1936	1941	1785	2115	1703	1986	2503	3594	2574	3813	2572	2563	2458	3105	1740	1315	1495	1748	1439	2002	3613	2074	2162	2409	1548	4746	2172
MA2550.1	ZNF275	11489	22897	38610	25874	5085	62561	67844	69370	49152	82028	7313	12081	8952	55375	49471	22659	8757	9947	137696	76855	15873	17303	26335	16594	24375	13483	27809	28402	30070	24129	12183	21204	15848	17172	24361	11749	16707	16058	16975	13575	13275	20938	18710	19162	25248	10319	27924	14985
MA2551.1	ZNF286B	1197	3751	6015	4294	2246	5761	7151	6657	7037	6893	1044	1512	1659	7352	5236	2910	1404	1695	15896	6686	2444	1402	1839	1355	2465	3703	1820	2592	3266	3261	1148	1893	1413	1658	2198	1101	1129	1348	1459	1209	1130	1907	1701	1414	5545	976	2095	1501
MA2552.1	ZNF367	1473	4931	8711	2411	996	7185	7804	6712	1602	8678	835	1175	919	2621	1813	2784	933	815	9876	8052	1358	822	578	481	574	379	653	677	1253	675	2117	661	2661	769	856	743	378	382	496	392	785	972	691	871	649	385	1759	632
MA2553.1	ZNF407	4690	7485	25139	9596	4758	22236	35016	31403	15841	27739	5449	7046	6790	25091	26654	9199	7498	6925	68395	42315	18567	15910	16603	18757	24201	7587	19947	17496	32461	19998	7814	11020	13854	6697	15219	5757	20208	10812	13448	11915	10870	11377	17374	14077	20069	6035	20615	7682
MA2554.1	ZNF471	2755	12081	20098	5229	4745	9099	9001	9057	7089	10134	10761	8668	14474	10855	5805	7114	13741	4673	21799	9802	4437	3263	3169	2806	3356	2205	3088	6549	4517	3951	3230	4032	3236	3825	4986	2409	2041	2408	2894	2299	2741	4238	3338	3315	3185	2608	4853	3157
MA2555.1	ZNF493	1826	8206	14500	40419	1451	12319	16243	13825	12630	16375	1668	5083	1903	12871	12078	3795	1850	1784	27594	14157	3709	2492	3456	2465	3180	2613	3415	4188	6668	5143	2549	6682	3550	4689	6848	2640	2366	3405	4004	2667	2825	5719	4839	2564	3445	1793	6930	4315
MA2556.1	ZNF510	1603	4577	4228	2974	1311	9276	5858	7012	5420	9117	1410	1627	1449	5512	3944	2857	1457	1797	17951	7722	2141	1705	2244	1151	1520	5993	2168	2432	2695	1952	1312	1863	1345	1776	3604	1172	935	1248	1508	1066	1256	2316	1905	1477	4541	948	2674	1684
MA2557.1	ZGLP1	0	0	0	0	0	0	0	0	0	0	0	0	0	0	0	0	0	0	0	0	0	0	0	0	0	0	0	0	0	0	0	0	0	0	0	0	0	0	0	0	0	0	0	0	0	0	0	0
MA2558.1	MSANTD4	317	761	1316	1255	249	1071	1048	1194	1020	1196	238	251	214	2483	728	439	293	262	3344	1278	272	200	167	145	239	189	172	289	165	165	147	156	140	124	860	117	110	125	106	113	136	269	150	213	293	179	311	98
MA2559.1	NACC2	0	0	0	0	0	0	0	0	0	0	0	0	0	0	0	0	0	0	0	0	0	0	0	0	0	0	0	0	0	0	0	0	0	0	0	0	0	0	0	0	0	0	0	0	0	0	0	0
MA2560.1	POGK	66	134	490	233	61	162	254	230	200	162	118	366	123	248	154	147	93	61	1030	214	100	39	38	34	40	46	44	59	28	28	110	25	63	20	91	52	31	47	17	27	61	32	32	58	68	40	51	15
MA2561.1	TIGD4	2234	4688	9978	6607	973	4271	7185	4732	3413	4637	960	1470	1414	4273	3094	2425	1879	1587	16067	4992	1379	1265	1531	855	1813	836	1689	1637	2860	1345	6454	1061	4237	1148	1357	2322	850	1108	852	964	1989	1251	1077	2031	1522	665	1890	940
MA2562.1	TIGD5	1911	1575	15757	9011	510	2703	4017	3602	1905	3294	518	854	543	2767	1984	1259	535	837	8450	3647	651	787	747	499	770	377	881	962	730	632	12182	406	2902	379	471	930	567	681	348	619	1354	601	481	1416	845	352	1035	428
MA2563.1	TIGD7	281	425	1547	411	206	517	518	778	470	519	191	181	255	576	356	337	218	163	1653	856	251	57	145	101	132	89	130	154	292	116	181	146	175	120	129	142	81	96	90	100	179	195	134	107	120	79	402	132
MA2564.1	ZNF43	1148	5954	8205	9362	1386	9274	7492	8636	6999	9780	2316	3687	3055	10720	5048	5175	3131	2487	23696	9181	2947	1323	1882	1433	2206	1750	1959	4661	1928	1974	1598	1502	2063	1541	3452	1425	1106	1419	1218	1242	1626	1731	1599	1567	2119	999	2071	1253
MA2565.1	ZNF70	0	0	0	0	0	0	0	0	0	0	0	0	0	0	0	0	0	0	0	0	0	0	0	0	0	0	0	0	0	0	0	0	0	0	0	0	0	0	0	0	0	0	0	0	0	0	0	0
MA2566.1	ZNF395	0	0	0	0	0	0	0	0	0	0	0	0	0	0	0	0	0	0	0	0	0	0	0	0	0	0	0	0	0	0	0	0	0	0	0	0	0	0	0	0	0	0	0	0	0	0	0	0
MA2567.1	ZNF497	263	1109	1286	773	319	939	916	1181	1142	923	425	454	392	1187	797	589	394	385	3226	1310	502	314	258	260	270	362	231	512	351	504	310	394	289	315	306	271	166	212	312	198	257	381	343	286	373	199	362	316
MA2568.1	ZNF568	1340	5456	5283	4005	2864	9360	12363	11682	7033	11500	2692	5886	3257	10843	10047	4573	3567	2616	26460	13907	3873	2375	2319	2315	2805	1940	2463	3476	4623	5193	2006	4450	2518	3544	4347	1835	1812	1982	3561	1977	2010	4125	4544	2715	2597	1773	4548	2941
MA2569.1	ZNF676	1902	3560	6401	4870	1546	10424	13510	12091	9826	12106	2095	3076	2532	10323	8302	3455	2406	2291	31527	12905	4290	3504	4262	3855	5135	2824	4707	6073	8525	5685	2344	5350	3887	3744	4809	2557	4046	3466	4063	3282	3098	4717	4604	3881	5299	2302	6550	3450
MA2570.1	ZNF746	94290	361804	333232	161411	145076	270768	407117	379841	251089	313238	197954	193724	255321	351969	262583	227122	237224	149259	269759	447590	169539	107629	88946	77511	136530	62133	93226	114789	92468	91726	71803	80894	98028	54567	92659	52816	48215	61219	57267	63807	64730	71044	70538	85967	98043	59643	82703	50370
MA2571.1	ZNF800	0	0	0	0	0	0	0	0	0	0	0	0	0	0	0	0	0	0	0	0	0	0	0	0	0	0	0	0	0	0	0	0	0	0	0	0	0	0	0	0	0	0	0	0	0	0	0	0
MA2572.1	ZNF827	0	0	0	0	0	0	0	0	0	0	0	0	0	0	0	0	0	0	0	0	0	0	0	0	0	0	0	0	0	0	0	0	0	0	0	0	0	0	0	0	0	0	0	0	0	0	0	0
MA2573.1	ZNF836	3739	8856	18419	6271	3193	17694	32241	26628	16600	20099	5378	8426	8200	21580	16748	7562	7406	4540	48015	28937	8127	5244	7068	5592	9262	4830	8122	7980	14708	9885	4235	6009	6509	4350	7627	3337	4903	5257	6175	5713	5183	6155	8101	6198	9803	2775	9719	4493
MA2574.1	ZNF878	2183	3637	3503	1491	1036	3011	4871	3478	2555	2773	1372	1336	1679	3384	7920	1737	1646	1480	10061	3899	1529	2115	1127	1086	1240	842	1280	1844	1923	1575	823	1540	1460	1433	2221	834	823	828	1118	798	1017	1894	1609	2953	1178	776	2021	1298
MA2575.1	ZNF536	0	0	0	0	0	0	0	0	0	0	0	0	0	0	0	0	0	0	0	0	0	0	0	0	0	0	0	0	0	0	0	0	0	0	0	0	0	0	0	0	0	0	0	0	0	0	0	0
MA2576.1	ZXDB	10795	30367	43860	74759	8829	98012	98577	103806	85008	128360	15767	24937	17171	86509	71268	26798	16827	15164	209466	115356	24045	19018	20599	15811	23021	16058	21437	24817	33207	27841	8649	27278	14207	23264	28466	9775	14924	13152	20455	11540	10066	27903	24200	16969	24625	10984	31340	20942
MA2577.1	ZXDC	11653	31214	40892	58543	12852	106554	114919	119004	97759	137997	18625	26448	17987	103933	79861	29727	18009	17737	233218	133572	31988	21678	25549	20822	28107	18522	26526	28808	34488	31378	10378	29669	16555	25773	31696	11513	20902	16100	22923	14482	11690	31356	27144	20498	28437	13844	32934	23030
MA2578.1	ZBTB8A	29868	96308	149988	73038	80074	179692	253011	235976	165397	208046	130013	143734	170778	222751	167711	149715	157835	120020	301685	270867	113745	54502	65304	59412	92149	44006	69570	87046	94843	82783	48984	59359	64873	48903	75334	39845	55062	50777	58632	55553	53834	63610	71078	62192	79437	38703	80177	48969
MA2579.1	ZBTB8B	2697	1765	7186	1590	969	6082	10744	7123	2025	6278	1115	2297	1375	5368	3311	2185	1773	1557	17741	10967	1967	1866	2058	1776	2326	1138	2118	2392	3544	3145	1207	2577	1389	1504	2307	1029	1625	1385	1733	1182	1238	3686	2737	1897	2047	849	4350	1265
MA2580.1	ZNF20	2018	3739	5503	8047	949	6180	8676	6913	4901	7175	3561	1386	1213	6904	4664	2234	1055	1563	19252	7002	2493	1410	1232	1138	1704	1175	1301	2465	1892	1510	966	1476	1183	1197	2052	1350	667	1489	1124	1038	927	1559	1335	1277	1648	991	1602	1155
MA2581.1	ZNF66	7575	24931	50785	30139	6407	68245	98455	85748	65718	92418	13430	12027	12849	88698	66724	20000	14563	12483	144300	92120	26962	24168	38070	26244	34444	26233	39812	37489	49045	39500	18694	36196	26609	28482	35044	17089	26500	25369	31016	25624	21415	34261	33727	25461	42333	13621	41949	26912
MA2582.1	ZNF121	4730	24614	38206	21355	3318	12097	14199	12386	16424	14019	2987	6753	3557	16326	11498	8265	3490	4146	50729	13525	7387	3135	4827	3019	4564	4488	4915	6633	3656	3607	4170	3322	4305	3400	3792	5794	2768	3082	2550	2839	3535	3995	3093	3378	5911	2315	3677	3125
MA2583.1	ZNF142	9294	27866	55910	34688	22358	52931	91314	76191	39842	64313	40371	48655	62139	61798	51685	44841	54562	48217	186181	87119	52656	21768	26857	30905	45667	15672	30723	30845	53918	41323	16981	22288	26693	15377	31581	10899	33513	21062	26472	24228	21572	23155	34764	27583	38495	12920	40038	17815
MA2584.1	DNTTIP1	582	3600	3779	1802	688	1928	2094	1970	3741	1948	6965	8724	7705	2846	2359	838	7219	906	10416	2143	1228	450	488	559	672	395	457	608	322	368	414	337	491	280	327	383	401	425	251	383	376	300	311	549	623	472	312	278
MA2585.1	ZNF500	2602	4932	13695	3168	3004	13156	19522	17323	9285	14934	2299	2778	2510	13022	9658	4352	2651	3283	53560	18750	4236	7915	4108	2637	4327	2670	4299	6479	7165	5211	2654	4304	4220	3436	5022	4761	2615	3880	3621	3098	3649	4801	4666	3033	4920	2062	6174	2864
MA2586.1	ZNF518B	453	1589	1601	1567	395	1640	1863	2209	1851	1835	409	607	521	1546	2529	645	453	513	5412	2439	662	533	535	256	372	336	482	914	375	503	3820	633	2356	402	329	1342	342	907	211	390	2075	342	307	587	604	263	425	274
MA2587.1	ZNF672	17383	34760	83854	84485	18748	142775	170099	178539	117381	168920	22142	30215	26576	152753	100864	36677	26804	24811	287329	198420	40245	28458	45054	31787	48226	30988	47235	50031	54276	43882	21351	40551	29304	31611	42043	21419	24963	27662	32514	26010	23981	40427	37432	32054	45700	21008	49997	28123
MA2588.1	FAM200B	10134	14341	42856	19424	8803	39582	63152	57840	21163	50638	7445	10125	9234	40357	31601	19897	9683	11033	92480	66700	20437	15929	21877	22067	29705	9004	27601	20111	35687	32114	15224	15783	25920	8994	20967	11429	23648	18737	18059	18930	20700	15287	24717	23875	24724	7676	38360	8916
MA2589.1	ZNF728	2686	14713	38726	8421	2751	39102	47101	46673	48267	47967	4585	7883	4828	47754	45111	8149	5064	4545	82846	50543	10566	10287	14303	10569	14159	9173	14923	15514	26567	18460	6632	19384	7990	14591	14688	8091	8356	9033	14149	8236	6601	18473	15292	10836	14782	6585	20063	13643
MA2590.1	ZNF841	2738	7184	7063	4783	851	7169	9654	8316	7045	8039	2250	2630	1513	12544	5223	3375	1701	1638	20367	8775	2537	2045	3222	2025	3090	1899	3150	3760	3701	3542	1407	2884	1752	2835	4040	1504	2007	1846	2533	1638	1662	3173	3131	2333	3037	1827	3096	2355
MA2591.1	ZNF850	6699	22378	23358	24361	6464	29713	36931	34612	29147	42892	8789	14406	11124	41111	31970	31631	11110	10601	114441	38000	19852	35365	12971	8788	14376	9000	13740	19998	16072	14624	6063	12676	8666	10377	16207	5696	8693	7137	10464	7303	6435	13932	12874	10231	14815	5693	15530	8969
MA2592.1	MKX	0	0	0	0	0	0	0	0	0	0	0	0	0	0	0	0	0	0	0	0	0	0	0	0	0	0	0	0	0	0	0	0	0	0	0	0	0	0	0	0	0	0	0	0	0	0	0	0
MA2593.1	ZNF362	3503	68166	30463	2994	7261	5543	14276	8086	8422	5420	10310	3084	8427	10166	5709	11003	7989	3832	28768	10608	3172	4537	6906	6728	9851	4993	7428	6911	6149	4442	3039	7931	3776	3505	4981	2472	3606	3293	2989	2161	3257	5112	4535	6106	4759	6365	6277	2823
MA2594.1	DMTF1	5899	10649	19243	5475	4444	16072	25063	23048	17219	19861	4401	5751	5374	20976	17190	7907	5170	4461	57799	23240	12431	6586	9644	7673	10140	5087	10009	12104	16453	13590	4137	11632	6599	8992	13687	5121	8471	5530	9804	5589	5726	11742	11657	6432	9887	3996	16199	7585
MA2595.1	ZNF700	190	810	1424	683	232	726	845	732	556	702	299	369	371	580	2607	584	320	262	3437	768	387	135	141	174	183	103	148	246	196	161	229	147	172	240	166	155	111	130	125	124	152	200	115	184	140	133	199	258
MA2596.1	ZXDA	19181	39692	49802	89344	15036	116933	143634	137674	103093	146127	22416	30121	25073	128603	105321	34117	26463	26536	271715	150384	41838	27906	32065	27702	39025	22859	34619	40145	54699	43872	14772	37433	23496	32598	51062	16457	26874	21463	29947	21268	18112	40277	37019	26346	46703	15517	46814	30273
MA2597.1	LEUTX	2674	5604	17397	6003	2100	5904	6092	6010	4003	6648	1828	1674	1781	7431	4044	3733	1792	1689	17352	6020	1902	1082	1547	1140	1445	964	1758	1634	2689	2714	3354	2018	2127	1791	2083	1729	943	1395	1351	1008	2247	2247	1594	1235	1991	852	2619	1681
MA2598.1	MSANTD1	260	802	906	648	218	714	622	734	874	674	238	242	242	882	580	514	284	294	2890	880	476	182	112	174	168	98	104	212	114	176	296	106	398	138	178	106	110	106	116	120	208	130	174	146	144	148	202	124
MA2599.1	TIGD3	354	2132	2170	1260	269	1438	1503	1525	1601	2168	505	629	543	1739	1284	878	538	466	4778	1586	804	287	218	295	296	252	256	401	257	261	329	241	273	232	286	245	190	231	221	293	325	296	254	284	352	254	274	247
MA2600.1	TPRX1	305	1654	1768	686	861	1164	1350	1382	1110	1217	605	518	695	1657	1328	903	700	519	3793	1466	632	302	471	383	399	344	451	545	963	707	442	558	493	663	591	315	231	309	406	263	422	767	566	357	590	350	1007	679
MA2601.1	USF3	2088	7570	22194	2140	1568	6600	20012	9230	7194	7470	2124	2650	2904	10916	7580	2618	2606	2260	26952	9718	5630	2040	4780	4668	4670	2462	5144	4966	5184	4366	2776	3040	5446	2444	4184	4120	6492	5294	2756	4232	4856	3174	3598	2332	13392	2224	4020	2196
MA2602.1	ZBED5	12582	24229	33697	21669	7832	41869	62961	53280	32697	54295	11371	15449	12895	53631	43321	26607	14580	16995	135354	61624	23028	18054	28706	24731	36328	13979	32619	31687	42220	30343	11458	20176	18490	13887	21642	9627	26157	15058	19484	15560	14547	20080	24142	23239	32055	10765	40108	12742
MA2603.1	ZFTA	29772	73263	70499	69356	19530	104379	138926	117955	84232	122802	15108	31698	20814	97802	110862	29076	20401	15951	319866	134543	40614	21128	31319	28882	37225	18507	35518	36644	72662	39569	19232	29348	28529	21443	34440	18466	29536	23598	24729	21736	25375	28192	31665	24847	37782	14444	42099	19388
MA2628.1	HELT	1706	5205	12050	2850	1051	4829	7002	6133	4845	4963	1285	2038	2044	7373	3919	2348	1905	1550	19079	6276	3880	1287	2976	3352	3263	1501	3531	3118	2675	2840	1825	1626	3479	1186	2753	2584	4172	3261	1561	2430	2629	1635	2222	1587	3139	1463	2751	1036
MA2629.1	GSC::TBX21	5464	9867	24038	7018	4389	18032	24422	20565	14784	19529	4451	5065	4633	17163	11465	6978	5291	3899	64028	21453	5386	3721	3717	2565	4722	3126	3704	5774	5707	4674	3452	4467	4203	3947	5944	2845	1738	2657	3564	2624	3054	4734	3936	4034	4312	2215	5541	3642
MA2674.1	HIF3A	0	0	0	0	0	0	0	0	0	0	0	0	0	0	0	0	0	0	0	0	0	0	0	0	0	0	0	0	0	0	0	0	0	0	0	0	0	0	0	0	0	0	0	0	0	0	0	0
MA2675.1	HOMEZ	95	177	378	135	82	141	149	166	84	145	73	91	236	172	94	145	83	62	513	171	101	43	80	76	71	50	64	81	66	53	43	46	69	50	222	67	35	47	42	44	70	55	54	49	75	54	55	31
MA2676.1	HSF5	172	265	2024	442	1041	483	576	614	243	505	143	419	262	479	401	11410	214	163	1903	589	311	73	82	79	110	54	136	124	114	129	118	138	152	111	126	76	68	102	82	95	116	117	133	79	88	49	144	65
MA2677.1	HOXD1	323	456	1410	1588	168	632	767	622	655	857	405	395	462	555	492	258	436	218	1947	657	194	145	412	157	222	130	522	458	426	374	1168	313	854	270	235	529	160	224	266	222	632	464	307	230	286	116	693	184
MA2678.1	IRX1	0	0	0	0	0	0	0	0	0	0	0	0	0	0	0	0	0	0	0	0	0	0	0	0	0	0	0	0	0	0	0	0	0	0	0	0	0	0	0	0	0	0	0	0	0	0	0	0
MA2679.1	IRX2	0	0	0	0	0	0	0	0	0	0	0	0	0	0	0	0	0	0	0	0	0	0	0	0	0	0	0	0	0	0	0	0	0	0	0	0	0	0	0	0	0	0	0	0	0	0	0	0
MA2680.1	IRX5	0	0	0	0	0	0	0	0	0	0	0	0	0	0	0	0	0	0	0	0	0	0	0	0	0	0	0	0	0	0	0	0	0	0	0	0	0	0	0	0	0	0	0	0	0	0	0	0
MA2681.1	KLF8	119177	394018	472174	232377	159423	306534	469943	420395	268003	359134	218909	262947	297448	341151	261434	293026	300939	193231	449876	470664	277191	128635	157023	128534	233198	108024	173686	179352	227267	188621	117878	129713	170132	95476	174300	88153	88275	119541	113642	121860	121977	132926	145687	133959	196859	93054	191105	87555
MA2682.1	MYT1L	0	0	0	0	0	0	0	0	0	0	0	0	0	0	0	0	0	0	0	0	0	0	0	0	0	0	0	0	0	0	0	0	0	0	0	0	0	0	0	0	0	0	0	0	0	0	0	0
MA2683.1	NPAS3	0	0	0	0	0	0	0	0	0	0	0	0	0	0	0	0	0	0	0	0	0	0	0	0	0	0	0	0	0	0	0	0	0	0	0	0	0	0	0	0	0	0	0	0	0	0	0	0
MA2684.1	SOX30	866	2714	4178	2783	926	3026	3410	3284	2380	3122	976	1067	905	3036	2774	1754	906	1854	12917	3570	1233	1063	817	350	688	555	900	1214	2449	1367	1984	1494	2447	1515	1956	1806	665	2410	893	708	2175	1527	1176	1147	804	379	2400	1524
MA2685.1	TLX3	599	1110	5943	2116	388	1361	1527	1477	869	1268	873	1028	803	1296	1221	790	836	435	5198	1533	440	392	553	251	437	348	603	611	987	536	3646	587	1571	499	594	724	273	460	400	390	865	701	613	681	523	209	1022	480
MA2686.1	ZEB2	0	0	0	0	0	0	0	0	0	0	0	0	0	0	0	0	0	0	0	0	0	0	0	0	0	0	0	0	0	0	0	0	0	0	0	0	0	0	0	0	0	0	0	0	0	0	0	0
MA2687.1	ZNF251	830	2341	3597	978	750	1939	2320	2135	1791	2116	650	854	783	9788	2023	1099	798	854	5237	2235	977	506	621	442	516	471	627	715	613	609	469	576	445	512	634	455	345	466	456	459	413	634	517	467	550	395	633	656
MA2688.1	ZNF347	156688	305512	406506	238808	181904	424950	317699	270428	414620	471157	273465	227940	401994	310090	364292	219777	365073	157196	417424	348236	228393	169875	190388	118366	257175	137072	208039	184994	179820	187239	143386	155158	221493	115471	166578	96106	79920	111820	105052	100482	142454	139137	115233	142997	237255	117229	198858	101547
MA2689.1	ZNF470	1217	10760	7665	7845	3895	5903	5641	5882	4733	5632	5395	3622	8336	6967	4182	4224	7571	2625	17416	6202	3137	1698	2267	1617	2043	1292	2784	2559	1880	1707	1319	1702	1365	1474	1949	1248	1024	1182	1409	1120	1286	1795	1537	1953	1829	1524	1914	1397
MA2690.1	ZNF724	329	822	788	593	458	1080	1276	1247	1070	1116	360	772	375	1015	690	581	344	440	3475	1433	435	193	200	168	261	151	224	416	504	374	170	389	191	319	1160	219	159	161	275	146	237	432	303	210	317	160	542	341
MA2691.1	ZNF841	3192	9558	8921	7962	2536	16322	20128	18272	21378	18450	6071	4704	5073	23974	13874	5868	5797	4046	47327	19981	7555	5109	7516	5065	7056	4813	7617	7975	8527	7857	3788	7536	5289	6685	7546	4258	5062	4573	5750	4581	4540	8267	6548	5272	7031	3324	7451	6616
MA2692.1	ZNF43	550	4244	1913	1269	2795	1602	4398	1923	1996	1584	1056	911	1125	1774	1474	2322	1105	1301	6737	2165	1016	250	948	416	644	329	1103	1019	6038	1344	526	1521	793	1699	1209	629	211	424	773	342	1332	3275	2008	404	720	301	7802	1332
[truncated: 57 more columns]

## Sheet: Motifs in G4-free genomewide
Motif_ID	Motif_Name	Erpetoichthys_calabaricus	Latimeria_chalumnae	Leptobrachium_leishanense	Xenopus_tropicalis	Anolis_carolinensis	Chelonoidis_abingdonii	Chelydra_serpentina	Chrysemys_picta	Crocodylus_porosus	Gopherus_evgoodei	Laticauda_laticaudata	Naja_naja	Notechis_scutatus	Pelodiscus_sinensis	Pelusios_castaneus	Podarcis_muralis	Pseudonaja_textilis	Salvator_merianae	Sphenodon_punctatus	Terrapene_carolina	Varanus_komodoensis	Amazona_collaria	Anas_platyrhynchos	Apteryx_haastii	Aquila_chrysaetos	Athene_cunicularia	Cairina_moschata	Calidris_pugnax	Catharus_ustulatus	Corvus_moneduloides	Coturnix_japonica	Ficedula_albicollis	Gallus_gallus	Geospiza_fortis	Manacus_vitellinus	Meleagris_gallopavo	Nothoprocta_perdicaria	Numida_meleagris	Parus_major	Pavo_cristatus	Phasianus_colchicus	Serinus_canaria	Stachyris_ruficeps	Strigops_habroptila	Strix_occidentalis	Struthio_camelus	Taeniopygia_guttata	Zonotrichia_albicollis
MA0002.3	Runx1	4066	8028	16696	10498	3692	15792	19619	17467	14592	20444	5419	5286	5778	16833	13101	11078	5774	4731	48518	19506	7142	5873	5360	4078	6965	4434	5868	7716	10102	7339	4726	22370	6096	5392	7611	3742	3423	4044	5218	4188	4624	6942	6622	5715	6740	2822	9450	4827
MA0003.5	TFAP2A	2299	7805	15262	7216	2574	17319	22651	19874	16680	21963	3502	4721	3698	21024	14114	7149	4002	3426	63658	22924	7145	4248	4212	3415	5442	3161	4479	5902	7990	6247	3166	17374	4564	4398	6281	2733	3201	3122	4065	3108	3092	6182	5316	4095	5219	2206	7747	3929
MA0004.1	Arnt	0	0	0	0	0	0	0	0	0	0	0	0	0	0	0	0	0	0	0	0	0	0	0	0	0	0	0	0	0	0	0	0	0	0	0	0	0	0	0	0	0	0	0	0	0	0	0	0
MA0006.2	Ahr::Arnt	0	0	0	0	0	0	0	0	0	0	0	0	0	0	0	0	0	0	0	0	0	0	0	0	0	0	0	0	0	0	0	0	0	0	0	0	0	0	0	0	0	0	0	0	0	0	0	0
MA0007.4	Ar	1426	3431	7099	4106	1392	5970	7824	6961	5298	7709	1820	1710	1737	7739	5361	3262	1773	1908	18143	7934	2761	2191	2138	1627	2661	1627	2334	2949	3981	2935	1909	9178	2546	2084	3214	1606	1458	1622	1999	1748	1936	2725	2459	2108	2598	1173	3748	1853
MA0009.2	TBXT	1848	3041	7687	4599	1185	5505	7688	6412	4787	6797	1694	1663	1866	5619	4603	2628	1848	1842	14515	7242	2305	2202	1925	1354	2286	1517	1983	2543	3335	2416	1790	8003	2169	1696	2323	1385	1167	1430	1630	1419	1597	2147	1897	1909	2482	862	3160	1605
MA0014.4	PAX5	1504	1729	6301	2173	809	4130	5864	4898	3134	5022	1030	1298	1286	4576	3350	1993	1167	1030	16754	5712	1637	1322	1103	907	1520	890	1202	1743	1738	1314	906	3717	1300	849	1278	794	884	912	876	828	895	1132	1121	1097	1470	583	1616	801
MA0017.3	NR2F1	2853	5657	13637	4874	2518	9742	12389	11531	9463	12816	2880	3760	3369	10444	8506	5049	3249	2634	31725	12936	3790	2601	2480	2076	3330	1948	2620	3536	4284	3311	2131	9837	2585	2171	3562	1647	1824	1884	2259	1801	2022	3054	2852	2260	3242	1393	4290	2077
MA0018.5	CREB1	3982	6478	15516	6680	2425	9728	12192	10975	8318	12207	3300	3587	3829	9945	9033	4327	3672	2607	28365	12776	3775	2918	3018	2357	3692	2473	3178	3851	4991	3806	2826	11143	3492	2590	4455	2433	1848	2559	2709	2419	2834	3510	3340	2842	3796	1521	4805	2330
MA0019.2	Ddit3::Cebpa	2129	4811	10694	6287	1961	8476	10840	9941	7163	10398	2646	2609	2677	8518	6737	4492	2730	2578	23197	11219	4444	2468	2414	2211	3319	1821	2670	3187	4130	3108	2194	9290	2747	2102	3091	1768	1745	1910	2045	1927	2126	2823	2598	2360	2948	1412	3789	1985
MA0024.3	E2F1	644	1635	5002	2919	526	2621	3630	2990	1081	3124	504	488	540	2743	1569	1401	734	435	7763	3676	1450	207	226	267	316	151	247	310	327	302	180	656	259	209	226	149	265	153	128	143	187	229	243	233	293	177	319	132
MA0025.3	NFIL3	3493	5770	11145	8048	2808	9370	11849	10952	8290	11419	3959	3832	4046	11454	7851	4507	4058	2887	21095	12417	4345	2862	3272	2811	4083	2563	3412	4171	5095	3822	2729	11921	3414	2749	4036	2226	2158	2420	2752	2218	2707	3419	3314	2829	3918	1801	5092	2535
MA0027.3	EN1	0	0	0	0	0	0	0	0	0	0	0	0	0	0	0	0	0	0	0	0	0	0	0	0	0	0	0	0	0	0	0	0	0	0	0	0	0	0	0	0	0	0	0	0	0	0	0	0
MA0028.3	ELK1	1550	1762	6272	2181	782	3233	5084	4082	2173	3984	1334	1405	1831	4798	2960	3518	1497	1037	15265	4765	1468	585	439	559	689	340	496	737	1404	702	515	1503	685	371	711	398	409	492	346	474	459	523	529	540	642	424	735	309
MA0029.2	Mecom	3119	5786	9122	5962	2690	9253	11108	10162	7784	11155	4089	4474	4902	10806	7872	3785	4832	2770	22916	11481	3801	3060	3229	2635	3940	2554	3550	4438	5467	3806	2847	12357	3573	2731	4130	2279	2381	2542	2764	2297	2832	3450	3277	2857	4002	1740	5036	2394
MA0030.2	FOXF2	3506	6641	11214	7399	2696	9414	11843	10948	6938	11515	3498	3789	4078	9382	7429	4865	3803	2653	23074	12381	3709	2738	3105	2505	3775	2458	3429	3938	4935	3784	2850	10980	3281	2776	3778	2176	2018	2280	2607	2265	2507	3321	3148	2831	3764	1781	4858	2403
MA0031.2	FOXD1	2985	5801	12070	6347	2154	9133	11351	10513	6710	11360	2390	2568	3239	9205	6940	4054	2840	2226	21405	12116	3227	2363	2807	2237	3370	2246	2955	3511	4139	3236	2382	9227	2869	2366	3461	1851	1643	1977	2234	1987	2273	2873	2906	2618	3381	1558	4062	2119
MA0032.2	FOXC1	7419	14258	23654	17720	6787	17150	22186	20568	13421	21041	7926	11802	10041	18108	14930	8536	9269	5798	66511	23230	9727	4811	7766	4943	6815	4381	8402	7379	9536	6703	5995	22225	6225	5179	7355	4086	4620	4360	5241	4024	5076	6086	5862	4919	6917	3026	9627	4705
MA0033.2	FOXL1	2985	5801	12070	6347	2154	9133	11351	10513	6710	11360	2390	2568	3239	9205	6940	4054	2840	2226	21405	12116	3227	2363	2807	2237	3370	2246	2955	3511	4139	3236	2382	9227	2869	2366	3461	1851	1643	1977	2234	1987	2273	2873	2906	2618	3381	1558	4062	2119
MA0035.5	GATA1	1574	3081	6779	5173	1559	6064	7502	6955	5244	7945	2207	2436	2546	7676	5672	2420	2616	1759	15678	7860	2429	1664	1720	1650	2313	1402	1858	2609	2758	2206	1546	6361	1789	1508	2265	1257	1287	1361	1595	1317	1425	1919	1783	1842	2237	1037	2630	1353
MA0036.4	GATA2	1648	3604	7592	5718	1823	7015	8321	7525	6553	8526	2914	2973	3298	7058	5711	3151	3313	2332	17407	8795	2902	2304	2473	2053	3086	1777	2537	3120	4147	2837	2237	8401	2772	2008	2965	1727	1732	1868	2003	1836	2142	2612	2327	2173	2995	1440	3630	1837
MA0037.5	Gata3	1627	3381	7262	5216	1837	6674	7897	7262	6257	8127	2919	3004	3292	7259	5448	3091	3347	2170	17079	8233	2860	2338	2499	2060	3045	1817	2510	3131	4132	2929	2224	8556	2772	2100	2970	1763	1709	1931	2063	1769	2125	2661	2391	2213	3028	1397	3765	1847
MA0038.3	GFI1	2964	5961	15025	7598	3071	12030	14940	13556	10051	14398	3939	4439	4307	13035	11094	4972	4250	3373	27933	15290	4506	3990	3894	3252	4784	2840	4182	5301	7059	5074	3738	16075	4580	3779	5363	2766	2680	3109	3655	2938	3485	4754	4475	3582	4591	2115	6339	3457
MA0039.5	KLF4	2745	10588	15639	8901	3368	18044	26255	22418	16102	23537	5954	7068	6661	21766	16023	11172	6626	4718	95606	25908	8015	4908	3338	2408	4902	2960	3607	6411	7440	5342	2799	14748	3911	3454	5478	2248	1836	2587	3327	2459	2625	4701	4369	3525	4966	1610	6281	3108
MA0040.2	Foxq1	4997	9991	14685	11947	3579	12497	15817	14595	10078	15399	5051	5670	5855	13357	11141	6839	5571	3622	30918	16574	4958	3731	4296	3583	5051	3227	4727	5095	6592	4981	3663	15155	4380	3816	5146	2829	2737	3137	3549	2795	3408	4493	4251	3658	5149	2273	6621	3194
MA0041.3	FOXD3	9177	22193	31151	18913	7223	21038	25818	24436	15830	25525	9728	13354	11950	20982	19169	11592	10859	7148	82551	27360	11432	6799	12308	6056	9216	6033	13099	10256	13256	8833	9208	31609	9409	6693	10079	6111	5889	6036	7403	5685	7433	8491	8154	6633	8702	3906	12683	6033
MA0042.2	FOXI1	2985	5801	12070	6347	2154	9133	11351	10513	6710	11360	2390	2568	3239	9205	6940	4054	2840	2226	21405	12116	3227	2363	2807	2237	3370	2246	2955	3511	4139	3236	2382	9227	2869	2366	3461	1851	1643	1977	2234	1987	2273	2873	2906	2618	3381	1558	4062	2119
MA0043.4	HLF	3006	5069	9784	7966	2661	8161	10048	9354	7041	9747	3341	3125	3441	10006	6513	3779	3459	2460	18428	10651	3852	2335	2754	2359	3376	2130	2840	3441	4154	3095	2212	9449	2754	2224	3216	1779	1829	1958	2236	1835	2195	2693	2666	2292	3163	1510	4114	2058
MA0046.3	HNF1A	4054	5546	12042	8729	2563	9041	11663	10766	6771	10554	3653	4169	4184	9946	8141	4107	4233	2307	24652	12019	3563	2643	3232	2547	3773	2424	3627	4105	5403	3569	2806	12125	3184	2703	3979	2134	2207	2420	2770	2051	2517	3479	3266	2670	3687	1686	5315	2500
MA0047.4	FOXA2	4420	8381	15677	10200	3398	12892	16236	14794	9614	15974	3814	4180	4923	13082	10077	5628	4616	3103	28641	17190	4497	3483	4019	3262	4925	3182	4286	4999	6227	4738	3479	14078	4131	3519	5138	2669	2521	2896	3361	2824	3279	4247	4234	3708	4846	2225	6186	3114
MA0048.3	NHLH1	4487	9400	22855	10364	4098	25510	31043	28110	25000	31238	5893	7154	6201	29396	21571	12189	6656	7662	85000	32124	12179	7686	8701	6744	11058	6186	9254	10806	16393	12602	7693	37697	10162	8987	10858	6062	5827	6724	8537	7376	7506	11825	10080	7481	10113	4105	15469	7959
MA0050.4	Irf1	8558	17926	24357	15452	6202	23936	29429	26819	20933	29008	10045	10457	11624	25311	21623	11515	11325	7943	60017	30402	11234	8925	9737	7709	11518	7060	10357	12298	15918	11873	8703	36769	10591	8349	12060	6791	6404	7454	8406	6740	8221	10931	10227	8644	11434	5347	15192	7595
MA0051.2	IRF2	2829	6285	10647	6222	2263	8119	10021	9110	7069	10320	3111	3428	3667	8669	7322	4099	3553	2674	22803	10262	3941	2802	3050	2484	3843	2230	3233	4231	5173	3819	2785	12416	3329	2742	3976	2169	2079	2298	2682	2179	2593	3624	3175	2908	3615	1799	4898	2337
MA0052.5	MEF2A	5647	12989	21256	13812	4962	16285	20878	18938	13978	19569	6899	7425	7898	19409	15597	8097	7882	4798	39102	21638	6707	4987	6617	5112	7398	4682	7001	8317	10431	7254	5002	22782	6132	5458	7620	4031	4488	4486	5518	3916	4917	6773	6339	5145	7176	3513	10013	4982
MA0056.3	MZF1	1894	6520	11833	7228	2452	11183	15371	13951	9344	14096	3176	3320	3645	13801	9409	6310	3542	2542	38986	16210	4549	2738	2731	2137	3449	2107	2856	4102	5979	4184	2369	12477	3422	3057	4248	1859	1776	1993	2714	2096	2110	4026	3455	2552	3551	1295	5426	2761
MA0058.4	MAX	0	0	0	0	0	0	0	0	0	0	0	0	0	0	0	0	0	0	0	0	0	0	0	0	0	0	0	0	0	0	0	0	0	0	0	0	0	0	0	0	0	0	0	0	0	0	0	0
MA0059.2	MAX::MYC	1544	4083	14342	3110	1084	6181	7918	7033	6313	7176	1686	1798	1675	8198	4905	3910	1627	1733	22976	8022	2865	1484	2124	1512	2486	1400	2249	2742	2919	2598	1629	7015	2400	1577	2749	1446	1847	1574	1518	1691	1609	2103	2002	1878	2347	1117	2824	1391
MA0060.4	NFYA	2502	6761	10418	8906	2024	8368	9956	9356	6230	10243	4006	4628	4416	8656	7193	4932	4489	2789	25930	10431	3264	1458	1317	1154	1822	995	1468	1832	2490	1973	1363	5519	1769	1567	1944	1030	982	1192	1208	1098	1295	1943	1613	1387	1754	774	2422	1480
MA0062.4	GABPA	4669	9377	18580	9710	3842	19702	25716	22717	17370	24774	5568	6161	6377	21795	16592	9638	6382	5833	56943	25618	9348	5740	5723	4825	6900	4322	6110	8079	10994	8154	5264	23945	6818	5631	8096	4161	4283	4565	5589	4515	5032	7442	6897	5476	7089	3282	9901	4954
MA0063.3	NKX2-5	1961	3265	6447	3363	1448	7027	8921	8017	4961	8382	1921	2195	2045	6940	5883	3337	2046	1681	19061	8963	2689	2072	1840	1460	2419	1489	1972	2671	3319	2459	1778	7399	2117	1852	2541	1424	1258	1493	1714	1513	1704	2312	2121	1848	2302	998	3101	1554
MA0065.3	Pparg::Rxra	3240	10351	19544	10335	3490	19316	25204	22657	18049	24410	4534	5969	5172	22006	16634	9835	5039	4795	60107	26140	8443	4947	5049	4254	6603	3738	5506	7321	9281	7181	4164	21486	5573	5023	7570	3304	3837	3744	4671	3669	4049	6861	5925	4861	6510	2853	8565	4383
MA0066.2	PPARG	1186	4342	7127	5171	1443	6656	8705	7719	6407	8325	1426	2035	1712	7427	6125	2896	1745	1603	21433	8849	2915	1688	1553	1231	1940	1252	1661	2405	2705	2126	1563	6862	1828	1388	2315	1120	1086	1201	1368	1150	1446	1889	1749	1580	2085	821	2581	1261
MA0067.3	PAX2	697	1303	3346	1493	389	2300	3477	2860	2020	2899	628	559	658	2565	1892	1512	637	536	8510	3461	1166	660	692	532	927	550	795	1016	909	852	604	2205	835	484	740	471	496	576	466	494	555	641	630	657	939	348	936	375
MA0068.2	PAX4	1662	2304	3760	4139	1273	4307	5863	5102	4994	4879	1378	1752	1647	9483	5716	1618	1716	1423	8435	6038	1532	1134	1491	1179	1719	1043	1538	1979	2502	1759	1230	5279	1400	1336	1910	936	1040	1074	1291	1002	1158	1644	1483	1220	1676	802	2348	1204
MA0069.1	PAX6	1406	2309	5972	3383	1056	4426	6007	5258	3775	5446	1498	1555	1560	5226	4901	2225	1529	1297	11405	6122	2264	1490	1542	1344	2080	1238	1648	2125	2450	1928	1457	5706	1727	1355	1899	1124	1052	1306	1235	1206	1317	1681	1538	1604	1965	916	2327	1171
MA0070.2	PBX1	2846	5453	7488	5378	2336	6952	8823	8035	6148	8792	4375	4853	5036	7449	6695	4012	4708	2442	20324	9136	3608	1892	2092	1767	2464	1644	2326	2903	3877	2591	1891	9930	2373	1884	2810	1560	1423	1593	1986	1498	1970	2533	2397	1995	2691	1119	3680	1774
MA0071.1	RORA	2762	6023	10718	6089	2651	9547	13865	11539	8446	12238	3162	3893	3588	9948	9345	4923	3539	2662	28874	13043	4010	2703	2694	2259	3651	2202	2913	3705	4461	3454	2534	10339	3042	2402	3890	1904	1927	2117	2431	1950	2366	3083	3021	2514	3578	1581	4448	2147
MA0072.2	RORA	2024	4271	8094	4871	2485	7869	10571	9520	7240	9681	2599	3063	2990	8619	9148	3299	2948	2068	19204	10689	3170	2060	2240	1947	2945	1903	2395	3109	3703	2812	1992	8629	2528	1904	3011	1643	1595	1750	1932	1609	1884	2486	2359	2207	2985	1416	3735	1719
MA0073.2	RREB1	6153	27195	26570	11461	5489	20847	29693	29525	17619	28986	8462	8953	9991	23905	18548	16491	10111	4693	99737	31197	9167	7593	8126	4121	8904	6121	9029	12273	14068	9451	7236	39521	7923	7174	10615	4700	3345	4636	6577	4516	5651	9636	8879	7822	8297	2655	13160	5815
MA0074.1	RXRA::VDR	1822	3684	7242	3871	1474	6142	8805	7547	4930	7932	1379	1517	1536	6731	5166	2807	1540	1368	16591	8554	2008	2156	1470	1120	1870	1098	1583	2238	2390	1822	1271	5557	1567	1198	2027	955	1058	1130	1144	1074	1210	1663	1558	1442	1708	712	2243	1055
MA0075.4	PRRX2	2585	4313	7463	6451	1932	7301	10744	8454	8106	8691	2619	3060	3162	8342	6488	2831	3080	2265	14931	9563	2725	2113	2610	2206	3147	1943	2815	3596	4303	3089	2330	9463	2631	2435	3376	1729	1827	1986	2357	1824	2120	2949	2708	2237	3063	1473	4188	2145
MA0076.3	ELK4	2261	3525	9185	4364	1371	6474	9582	7926	5466	7847	2329	2274	2652	9163	5442	5033	2348	2175	24933	9103	3531	1412	1254	1303	1609	961	1361	1797	2909	1920	1272	5004	1705	1212	1817	1037	1039	1217	1165	1212	1202	1577	1508	1320	1694	946	2120	1071
MA0077.2	SOX9	2863	5566	10947	9289	3181	11045	14711	13381	7697	13608	4891	5975	5805	11383	10311	5118	5523	3342	27324	15425	4634	2179	2446	1877	3079	1793	2607	3125	4065	2939	2193	8648	2527	2249	3130	1670	1429	1899	2177	1689	2103	2672	2559	2249	3054	1269	3724	1940
MA0078.3	Sox17	3987	7062	15011	10458	3772	13964	18591	16979	10777	17249	5241	5357	5524	14435	12868	6878	5566	4275	33288	19237	6052	3420	3647	2796	4416	2709	3957	4585	6383	4628	3313	13594	4012	3397	4698	2551	2221	2967	3208	2671	3280	4280	3883	3494	4653	1837	5638	3041
MA0079.5	SP1	2435	15370	18711	8742	3449	16781	26553	21735	13355	21349	4277	5648	5362	21557	13502	11451	4955	3916	75060	25454	7532	3366	3424	3191	4890	2646	3823	5002	6396	4553	2691	12904	3736	2974	4691	1961	2468	2481	2808	2516	2420	4154	3861	3178	4372	1741	5552	2679
MA0080.7	Spi1	5816	11975	22391	11676	5877	23600	30657	27685	19751	29912	10302	11005	12101	27374	22339	15436	12024	8244	67329	31450	12494	7142	7439	6337	9542	5586	7966	10606	12624	9876	6748	31720	8713	6920	10136	5647	5450	5810	6521	5608	6470	9186	8053	7085	9322	4162	12115	6041
MA0081.3	SPIB	4672	9293	18627	10535	4353	20202	26240	23420	17406	25578	7043	7193	7406	22169	18958	10629	7439	5825	56454	26248	9617	5791	5862	5156	7504	4417	6262	8381	10286	7846	5596	23908	7156	5401	8330	4414	4235	4828	5217	4724	5289	7180	6543	5681	7580	3430	9552	4760
MA0083.3	SRF	1330	3272	6498	8322	1429	5013	6228	5713	3895	6252	1587	1866	1674	5233	5255	2210	1682	1443	14056	6384	2313	1088	1265	1084	1553	995	1252	1745	2060	1538	1277	4636	1390	1063	1644	905	878	912	970	811	945	1237	1229	1184	1625	612	1822	909
MA0084.2	SRY	5809	10161	16799	16020	5210	15840	20208	18344	11916	19177	7168	7882	8625	16253	13322	7737	8304	4797	39172	20675	6580	4192	5081	4038	6088	3710	5592	6069	8183	5983	4420	18086	5192	4802	6247	3585	3125	3842	4461	3454	4419	5955	5303	4194	6022	2629	8228	4210
MA0087.3	Sox5	3822	5951	12414	9939	3381	11392	15065	13799	8680	14213	4748	5197	5375	11895	10015	5791	5199	3538	27926	15630	5187	2737	3082	2329	3665	2217	3163	3668	5125	3640	2566	10552	3189	2777	3726	2063	1747	2339	2643	2148	2616	3362	3156	2822	3712	1473	4566	2513
MA0088.3	ZNF143	1310	2816	8257	4454	2390	6131	7819	7070	5186	7773	2042	2400	2360	6927	5299	4169	2349	1371	19541	8120	3406	1483	1512	1160	1994	1190	1683	2190	2978	2243	1470	8086	1773	1530	2226	1078	987	1209	1482	1168	1326	2092	1830	1391	2005	747	2769	1408
MA0089.3	MAFG::NRF1	2681	4844	8367	4737	2327	10567	13478	11804	9036	13095	2890	3218	3164	11183	9958	5384	3313	2850	27984	13824	4549	3541	3463	2942	4365	2730	3742	4552	5904	4581	3194	13624	4127	3220	4656	2674	2498	2838	3154	2750	3237	4159	3685	3346	4477	1962	5546	2927
MA0090.4	TEAD1	3217	6932	12831	8219	3188	13137	16784	14856	9564	16614	4457	4554	4871	14273	11297	7221	5034	4711	35100	17262	7406	4326	3390	2948	4481	2723	3672	4701	7445	5443	3454	16276	4263	4054	5592	2841	2565	2847	3949	2807	3333	5347	4747	3676	4304	1759	7092	3731
MA0091.2	TAL1::TCF3	3782	9091	14867	7632	4302	15334	19031	16862	12991	18372	5149	5461	5568	16349	12616	8793	5375	4850	49999	19096	6653	4337	4641	3825	5792	3596	4880	6196	7943	5733	4211	17769	5119	4025	6046	3257	2953	3581	4132	3810	4036	5327	4949	4300	5681	2513	7267	3712
MA0092.2	Hand1::Tcf3	2888	7642	14791	6898	3638	13173	16467	15098	11933	16267	4577	4808	5118	16019	11616	6328	5020	4778	38228	17382	6250	3786	3898	3372	5251	3174	4098	5479	6920	5218	3427	15590	4107	3740	5312	2591	2618	2826	3717	2957	3239	5470	4344	3813	4941	2165	6521	3156
MA0093.4	USF1	2718	4855	13475	5329	2399	8968	12175	10617	8446	11275	4338	4852	5035	10196	8984	7442	4880	2128	24266	12025	3888	2044	2137	1887	2862	1740	2260	2791	3609	2942	1734	8051	2485	1892	3050	1500	1420	1779	1915	1648	1795	2588	2365	2008	2710	1272	3344	1747
MA0095.4	Yy1	4688	13546	15879	14104	4353	15513	20418	18291	14131	18817	6346	7144	7093	19959	13909	8413	6890	6186	54934	20836	8598	4154	4169	3722	5608	3354	4475	5714	7426	5428	3897	15689	4720	3974	5736	3083	2947	3334	3653	3110	3607	4974	4817	3999	5475	2257	6951	3602
MA0098.4	ETS1	1839	2680	7545	3354	1332	5316	7528	6301	3892	6589	2174	2260	2707	7013	4599	3891	2398	1737	18722	7331	2329	1246	1135	1204	1425	857	1227	1575	2810	1725	1096	4521	1482	1110	1681	945	958	1056	1045	992	1027	1400	1379	1219	1467	840	1992	932
MA0099.4	FOS::JUN	2222	3965	6016	4040	2044	7991	10062	9182	6029	9671	2612	2904	2873	8321	7298	3329	2914	1981	18749	10312	3465	2410	2369	2036	3189	2002	2611	3346	4155	3253	2282	8960	3094	2148	3298	1846	1735	2038	2279	1951	2198	2848	2691	2346	3260	1450	3791	2045
MA0100.4	MYB	0	0	0	0	0	0	0	0	0	0	0	0	0	0	0	0	0	0	0	0	0	0	0	0	0	0	0	0	0	0	0	0	0	0	0	0	0	0	0	0	0	0	0	0	0	0	0	0
MA0101.1	REL	1737	5405	14792	6519	2405	10305	14889	12760	8000	12573	2908	3424	3281	12971	9174	5992	3234	3070	34032	14401	4657	2459	2582	2173	3603	1997	2744	3854	6187	4327	2081	12752	3078	3056	4333	1684	1984	1860	2939	1861	1979	4223	3698	2755	3265	1407	5825	2687
MA0102.5	CEBPA	3434	6568	11129	8672	3065	10287	13187	12117	8884	12577	4254	4435	4701	15054	8878	5287	4660	3603	24360	13866	5373	3229	3443	2959	4451	2673	3707	4515	6104	4164	2868	13118	3565	3154	4326	2402	2463	2623	2940	2542	2900	3929	3627	3153	4231	1939	5571	2707
MA0103.4	ZEB1	0	0	0	0	0	0	0	0	0	0	0	0	0	0	0	0	0	0	0	0	0	0	0	0	0	0	0	0	0	0	0	0	0	0	0	0	0	0	0	0	0	0	0	0	0	0	0	0
MA0104.5	MYCN	1122	2762	13524	2458	562	4130	6000	5050	3860	4632	1202	1088	1240	5906	3412	2792	1180	970	16994	5492	2008	994	1846	1142	1976	1036	1872	2372	2236	2046	1312	5342	2166	1206	2224	1196	1656	1386	1112	1402	1448	1674	1610	1228	1860	884	2092	974
MA0105.4	NFKB1	1797	5133	15039	6464	1706	11308	15427	13265	10064	14347	2118	3201	2412	12341	8162	5130	2388	1968	50333	14743	4048	1975	2226	1699	3089	1668	2263	3765	4769	3604	1627	10189	2380	2286	3915	1505	1380	1509	2356	1461	1594	3300	2886	2134	3008	1046	4513	2156
MA0106.3	TP53	1533	2848	6825	3561	1390	5648	6994	6678	6779	7116	1513	1845	1645	6373	4562	2671	1617	1757	17643	7632	3149	1937	1809	1548	2537	1538	1973	2503	2843	2201	1504	7521	2075	1471	2316	1260	1269	1352	1461	1311	1413	1871	1824	1837	2421	987	2965	1364
MA0107.1	RELA	2943	7686	14557	8125	3087	12182	16688	15061	10067	15070	3499	4411	3925	16436	11001	7374	3843	3668	44630	16946	5738	3211	3202	2634	4524	2623	3550	4791	7849	5528	2756	16875	3942	4024	5524	2380	2348	2422	3803	2540	2726	5321	4876	3353	4228	1767	7620	3522
MA0108.3	TBP	0	0	0	0	0	0	0	0	0	0	0	0	0	0	0	0	0	0	0	0	0	0	0	0	0	0	0	0	0	0	0	0	0	0	0	0	0	0	0	0	0	0	0	0	0	0	0	0
MA0111.1	Spz1	1763	5890	10491	5993	1730	9855	12662	11887	8913	12594	2092	2742	2405	11069	8319	4861	2366	2282	30947	13618	3651	3080	2739	2310	3613	2172	2911	3906	4790	3678	2353	10803	2986	2574	3692	1811	1897	2008	2444	2088	2144	3402	3011	2683	3601	1520	4314	2281
MA0112.4	ESR1	1246	3152	10082	4601	1092	5871	7936	6863	5820	7206	1348	1396	1394	6215	5832	2564	1472	1458	20607	7642	2513	1700	1699	1209	2118	1297	1764	2538	3086	2344	1489	7242	2043	1583	2466	1181	1180	1409	1568	1198	1315	2218	1815	1729	2180	802	2994	1515
MA0113.4	NR3C1	1772	4003	7620	4772	1629	6461	8533	7545	5717	8540	2096	2051	2099	8131	5802	3153	2157	2101	18643	8371	2977	2519	2222	1788	2858	1736	2400	3126	4046	3071	1988	9480	2656	2132	3281	1777	1597	1766	2041	1811	2060	2858	2540	2270	2809	1220	3991	1884
MA0114.5	HNF4A	4982	9265	13371	7686	3686	13476	16922	15270	11099	16528	5193	5839	5957	14013	12404	7340	5807	4434	36609	17732	6016	3819	3880	3270	5023	3053	4089	5380	7108	5196	3273	15433	4220	3740	5456	2609	2732	2947	3503	2717	3145	4907	4395	3633	4970	2182	6412	3341
MA0115.1	NR1H2::RXRA	1726	4144	6327	4242	1517	6356	8131	7244	5651	7822	2080	2453	2451	6802	5729	3539	2439	1731	18734	8364	2757	1788	1851	1595	2485	1428	2017	2646	3327	2514	1635	8139	2044	1763	2655	1225	1356	1378	1701	1335	1463	2288	2152	1792	2427	1116	3050	1537
MA0116.2	ZNF423	2626	8892	18577	7503	2696	18498	25315	22410	17737	24521	3088	4699	3520	23289	15349	8025	3670	3375	71789	25605	7549	4315	5183	3686	6105	3481	5473	8067	10288	7384	3556	22519	5263	5102	7504	3062	3892	3754	4772	3556	3509	7407	6208	4043	6053	2145	9292	4446
MA0117.3	Mafb	3026	5443	11549	6538	2661	10738	13826	12221	9384	13325	3324	4574	3798	11008	9155	4966	3985	3028	26025	13861	4385	3775	3663	3139	4765	3072	4042	4865	6372	4736	3549	14487	4395	3342	4885	2849	2482	3082	3285	2932	3435	4288	3964	3456	4629	2091	5897	3045
MA0119.1	NFIC::TLX1	3090	5224	16414	7636	2990	12412	15663	14533	13050	15687	3789	4347	3621	14876	10760	6384	3905	3314	44142	17052	6324	3229	3180	2562	4181	2484	3484	4353	5327	4134	2582	12675	3490	2971	4122	2179	2204	2395	2766	2402	2550	4172	3494	2992	3908	1624	5356	2726
MA0122.4	Nkx3-2	2419	5859	7021	5911	1686	9135	11933	10745	7741	11077	3480	4052	4112	9712	7904	3545	3945	2065	17829	12352	3262	2474	2764	2383	3493	2238	2978	3550	4149	3349	2412	9893	2891	2203	3475	1827	1945	1933	2194	1972	2314	2769	2625	2489	3537	1594	4115	1970
MA0124.3	Nkx3-1	1401	4140	4319	3847	1169	5719	7585	6725	5138	7025	1822	2089	2092	7035	4955	2601	1885	1501	13938	7646	2350	1548	1544	1294	2026	1234	1701	2086	2345	1991	1382	5356	1722	1249	1901	1058	1096	1115	1290	1115	1269	1610	1477	1446	1892	907	2385	1090
MA0125.2	Nobox	0	0	0	0	0	0	0	0	0	0	0	0	0	0	0	0	0	0	0	0	0	0	0	0	0	0	0	0	0	0	0	0	0	0	0	0	0	0	0	0	0	0	0	0	0	0	0	0
MA0130.1	ZNF354C	0	0	0	0	0	0	0	0	0	0	0	0	0	0	0	0	0	0	0	0	0	0	0	0	0	0	0	0	0	0	0	0	0	0	0	0	0	0	0	0	0	0	0	0	0	0	0	0
MA0131.3	HINFP	538	812	6221	785	574	1989	2897	2500	989	2647	786	557	606	2094	1202	1115	505	419	7839	3267	1091	285	375	437	609	202	423	472	466	425	274	896	474	192	396	255	372	285	200	310	291	317	325	281	568	232	427	150
MA0132.3	PDX1	0	0	0	0	0	0	0	0	0	0	0	0	0	0	0	0	0	0	0	0	0	0	0	0	0	0	0	0	0	0	0	0	0	0	0	0	0	0	0	0	0	0	0	0	0	0	0	0
MA0135.2	Lhx3	6346	9241	19199	12735	3943	14185	17682	17661	11414	17115	6500	7398	7263	15571	16402	6329	7109	3680	37158	19288	5562	4143	5512	4008	6446	4205	5885	6958	9982	6859	4387	22668	4848	5096	6829	3457	3576	3711	5548	3147	4062	6538	5995	4268	6288	2553	9943	4796
MA0136.4	Elf5	4117	9606	14816	9178	5839	19093	25268	21645	18338	23425	9772	11812	12128	22035	21267	11562	12569	8243	50398	24670	11969	6582	6683	5562	8121	5098	7249	8606	11792	9308	6882	32443	8126	6018	8392	4847	5355	5355	5632	5232	5807	8129	7002	6723	8124	4073	11203	5078
MA0137.4	STAT1	2901	6696	13670	8472	3392	12153	15688	13739	11322	15828	5127	5596	5753	14475	11390	7033	5877	4676	31447	16011	7769	4384	4802	4173	6111	3807	5403	6685	9052	6713	4218	20952	5352	4678	6925	3547	3477	3966	4862	3524	4183	6192	5578	4439	5889	2754	8430	4239
MA0138.3	REST	1520	4199	8935	3855	1542	9761	12528	11386	8724	12617	2048	2042	1918	10644	7937	4282	1927	1781	36614	13274	3947	2617	2716	1960	3201	1951	2984	3831	5649	3906	2342	13596	3007	2786	3799	1790	2064	2110	2428	2069	2166	3788	3284	2612	3284	1290	5132	2460
MA0139.2	CTCF	2947	9418	15329	8163	1977	13406	18267	15979	12040	17307	3441	3814	3621	15383	11402	7043	3441	3336	53925	18079	5810	2928	3420	2353	3831	2242	3608	4802	6009	4213	2689	13105	3789	2935	4141	2238	2196	2525	2638	2576	2654	4188	3577	2916	3573	1521	5261	2639
MA0140.3	GATA1::TAL1	1751	3557	8550	4728	1706	6860	8017	7287	5755	8458	2077	2084	2183	6908	5665	2771	2093	1816	15034	8262	2571	2106	2153	1758	2776	1675	2405	2744	3659	2693	2100	8986	2454	1842	2839	1628	1483	1728	1836	1708	1887	2428	2230	1971	2728	1182	3359	1658
MA0141.4	ESRRB	2447	5733	9699	5887	3060	8941	12372	10881	8244	11050	3398	4055	3951	9339	8904	4914	4044	2671	29046	12359	4254	2808	2766	2271	3597	2277	2957	3975	4798	3631	2558	10624	3313	2468	3954	1936	2033	2238	2539	2034	2369	3343	3098	2603	3839	1543	4437	2296
MA0142.1	Pou5f1::Sox2	4434	8680	14850	11558	3838	14172	17868	16276	12685	17518	5114	5783	5689	17229	12918	7147	5614	4707	32240	18555	6400	4794	5208	4399	6476	4033	5739	6634	8937	6317	4713	20997	5552	4527	6678	3644	3676	4016	4602	3560	4510	5719	5461	4810	6432	2903	8367	4086
MA0143.5	SOX2	2479	4487	11298	6766	2365	9146	12143	11257	6390	11326	3429	4509	3644	9106	8839	4404	3688	2701	27196	12944	3706	1695	1862	1285	2237	1345	1882	2328	3220	2434	1644	6772	1927	1840	2439	1300	963	1466	1659	1326	1574	2265	2151	1860	2364	885	2881	1647
MA0144.3	STAT3	3541	8308	19307	10168	4674	15829	21043	18060	14802	20804	6904	7604	7763	25811	14704	9252	7768	6010	44691	20874	9958	5787	6240	5359	7771	4870	6909	8492	12149	8852	5290	27818	6817	6276	9020	4502	4425	4942	6379	4520	5369	8304	7578	5797	7652	3565	11640	5707
MA0145.2	Tfcp2l1	2070	5252	11577	6381	3022	14037	19076	17352	14826	18673	4024	4767	4551	21628	12891	6329	4383	3668	48178	19528	6417	3720	3525	3084	5077	2816	3940	5570	7901	5797	2947	18669	3847	4044	6219	2279	2776	2627	3757	2595	2695	7222	4796	3828	4822	1962	7600	3484
MA0146.3	Zfx	1680	5253	11519	5218	1952	12008	15951	14569	10469	15888	2308	2910	2606	13729	9766	4966	2482	3134	40190	17092	4696	2225	2388	2216	2608	1560	2611	2922	3671	3334	1913	7851	2965	2117	3309	1588	2415	2012	1924	1763	1710	3217	2776	1914	2777	1537	3703	1962
MA0147.4	MYC	1752	3593	16598	3532	866	6454	8429	7574	7442	7511	1684	1453	1704	8807	5459	3204	1578	1574	27184	8184	3421	1689	2498	1729	2948	1588	2572	3261	3341	3111	1893	8120	2903	1835	3201	1750	2181	1874	1731	2017	1933	2581	2310	1883	2725	1326	3221	1577
MA0148.5	FOXA1	2880	5572	11618	6112	2052	8786	10921	10165	6455	10921	2275	2464	3117	8872	6685	3893	2708	2125	20552	11679	3084	2277	2703	2128	3237	2160	2842	3380	3982	3101	2287	8955	2761	2263	3321	1775	1573	1918	2136	1911	2197	2757	2786	2515	3232	1496	3910	2048
MA0149.1	EWSR1-FLI1	5665	11105	21071	11924	7071	25565	33277	29122	25030	32763	16454	16651	19281	33005	29924	16992	19428	9981	97569	33325	16142	8890	9116	7323	11143	6423	10218	12712	17242	12711	9440	56866	11023	8867	11862	6397	6931	6994	7573	6511	7485	12138	9480	8693	10688	4743	15805	7214
MA0150.3	Nfe2l2	2695	4972	9649	5378	2296	11060	14251	12289	9546	13680	2901	3124	3221	11719	9934	5636	3333	3081	28387	14615	4712	3793	3492	2943	4442	2686	3783	4611	5881	4539	3272	13702	4212	3249	4701	2761	2495	2926	3103	2761	3241	4302	3681	3315	4436	1965	5558	2994
MA0151.1	Arid3a	0	0	0	0	0	0	0	0	0	0	0	0	0	0	0	0	0	0	0	0	0	0	0	0	0	0	0	0	0	0	0	0	0	0	0	0	0	0	0	0	0	0	0	0	0	0	0	0
MA0152.3	Nfatc2	5034	10434	19725	12452	5382	19501	24984	22758	16842	24047	8051	8092	8437	21365	17787	9308	8301	6341	46374	25536	9606	6412	7127	5918	8717	5404	7555	9421	12789	9312	6401	27862	8009	6839	9455	5105	5017	5778	6740	5349	6125	8738	7988	6457	8540	3914	12017	6113
MA0153.2	HNF1B	3665	4846	9890	7457	2227	8254	10559	9820	6106	9517	3167	3473	3778	9054	7383	3424	3703	1974	20259	11040	3022	2405	2879	2364	3357	2149	3108	3706	5019	3193	2461	10767	2840	2434	3539	1921	1997	2167	2466	1844	2299	3091	2927	2394	3324	1554	4759	2209
MA0154.5	EBF1	2993	8789	14657	9987	4420	20464	27685	25034	20769	27048	3506	5561	4217	25019	17298	8449	4423	3941	69251	28066	8419	6796	6045	4205	7209	4197	6338	10211	12515	9146	4503	27591	6088	6538	9936	3720	4273	4321	6271	3898	4244	9980	7919	5259	7157	2756	11614	5852
MA0155.1	INSM1	2329	8816	18087	9838	2426	14799	19302	16970	16034	18191	3267	4813	3707	17111	12382	7445	3803	3037	57601	19922	5631	3525	3415	2628	4423	2469	3621	5302	6389	4703	2691	14222	3418	3429	4979	2047	2171	2355	3024	2314	2405	4902	3959	3386	4111	1619	5886	2912
MA0156.4	FEV	1478	2041	6320	2207	781	3060	4938	3963	2101	3793	1529	1636	2073	4590	2842	3432	1691	1010	14637	4649	1393	585	461	563	673	339	506	677	1476	721	488	1561	659	378	698	411	429	495	367	472	434	487	529	546	676	451	740	319
MA0157.4	Foxo3	2985	5801	12070	6347	2154	9133	11351	10513	6710	11360	2390	2568	3239	9205	6940	4054	2840	2226	21405	12116	3227	2363	2807	2237	3370	2246	2955	3511	4139	3236	2382	9227	2869	2366	3461	1851	1643	1977	2234	1987	2273	2873	2906	2618	3381	1558	4062	2119
MA0158.2	HOXA5	2141	3948	7664	5199	2257	5638	7522	6584	5490	6936	1724	1898	1978	6380	5020	2112	2071	1618	12415	7693	2041	1948	2316	1873	2799	1703	2437	2930	3443	2643	1966	7642	2424	1826	2693	1486	1496	1692	1846	1694	1887	2383	2302	1992	2630	1277	3288	1664
MA0159.1	RARA::RXRA	1592	3538	9436	4647	1519	7423	9125	8482	6536	9351	1836	1848	1968	8120	6638	4325	1974	1856	26903	9673	3226	2188	2028	1562	2563	1633	2190	3036	3911	2719	1772	9162	2309	1893	2883	1437	1478	1545	1835	1581	1739	2570	2366	2055	2691	1147	3594	1795
MA0160.3	NR4A2	3856	8082	15861	10515	3904	13497	17631	15565	12015	16429	4766	5575	5267	15490	12595	7564	5315	4855	39535	17810	6752	4191	4550	3829	5855	3581	4795	6361	7650	5743	3925	17087	4999	4058	6222	3188	3378	3411	4165	3181	3757	5323	5056	4170	5682	2681	7330	3705
MA0161.3	NFIC	2360	5309	10304	5861	2906	9312	11933	10628	8908	11378	3966	5090	4784	9835	7442	5534	4887	3255	30329	12112	5225	3057	3018	2416	4029	2284	3281	4236	5239	4138	2539	11814	3128	2906	4148	1967	2316	2230	2819	2332	2342	5185	3437	3027	3712	1666	5117	2632
MA0162.5	EGR1	1844	4955	11866	4293	1358	7012	10905	9052	6227	8702	2242	2908	2785	9234	6383	4605	2962	1670	41162	10574	3622	1241	1542	1557	2592	1115	1774	2532	3203	2208	1220	5427	1925	1065	1903	912	1407	1218	1240	1214	1179	1607	1648	1397	2234	894	2599	1025
MA0163.1	PLAG1	2531	6427	13248	7155	2110	11945	16895	14689	12165	15302	2600	3878	2887	14984	10511	5810	3016	2619	50032	16779	5072	2719	2697	2031	3394	2136	2972	4432	5064	3805	2374	11144	3267	2649	4089	1927	1976	1945	2374	1889	2206	3634	3078	2460	3363	1298	4686	2301
MA0164.2	Nr2e3	0	0	0	0	0	0	0	0	0	0	0	0	0	0	0	0	0	0	0	0	0	0	0	0	0	0	0	0	0	0	0	0	0	0	0	0	0	0	0	0	0	0	0	0	0	0	0	0
MA0258.2	ESR2	2314	6338	12757	7398	1768	11163	16053	13506	10978	14540	2299	2616	2376	12311	10412	5353	2427	2425	37082	15133	4300	3139	2875	2247	3642	2209	3051	4555	5600	4156	2581	12999	3507	2919	4391	2117	2268	2388	2714	2220	2464	4080	3452	2982	3592	1514	5348	2596
MA0259.2	ARNT::HIF1A	0	0	0	0	0	0	0	0	0	0	0	0	0	0	0	0	0	0	0	0	0	0	0	0	0	0	0	0	0	0	0	0	0	0	0	0	0	0	0	0	0	0	0	0	0	0	0	0
MA0442.3	SOX10	0	0	0	0	0	0	0	0	0	0	0	0	0	0	0	0	0	0	0	0	0	0	0	0	0	0	0	0	0	0	0	0	0	0	0	0	0	0	0	0	0	0	0	0	0	0	0	0
MA0461.3	Atoh1	2390	4003	10813	5776	2136	7294	9223	8576	6854	9108	2843	2820	3148	8027	6495	4261	2975	2288	18640	9734	3525	2347	2488	2244	3113	1889	2684	3017	3424	2751	2053	7917	2602	1921	3066	1638	1760	1792	1961	1832	2002	2276	2369	2362	3140	1444	3389	1616
MA0462.3	BATF::JUN	1919	4414	4854	3021	1597	8119	10318	9262	5568	9852	2461	3455	2831	8261	7371	3037	2951	1919	19319	10648	2983	2068	2129	1758	2779	1674	2285	2900	3823	2963	1988	8337	2658	1989	3020	1645	1462	1799	2054	1694	1866	2557	2441	2030	2939	1227	3508	1899
MA0463.3	BCL6	1736	3294	6671	3371	1736	6536	8879	8082	5632	7974	2300	2430	2653	8767	7210	3737	2682	2122	18660	8577	3376	2298	2297	2081	2963	1733	2573	3064	4045	3090	1920	9279	2419	2065	3154	1664	1799	1834	2094	1715	1951	2744	2497	2155	2899	1377	3828	1903
MA0464.3	BHLHE40	1519	2111	10392	2458	391	4147	5213	4739	4489	4732	1610	1837	1657	5083	3484	2168	1596	942	16904	5318	1764	1002	1611	1211	2053	988	1640	2132	1803	1749	1249	4531	1969	981	1866	1141	1419	1339	923	1368	1256	1480	1318	1078	1631	1032	1674	850
MA0465.3	CDX2	4719	8497	22101	14305	4021	11010	14335	13203	10022	13313	4887	6270	5582	12094	10962	6278	5762	4065	34160	15235	5497	3847	4325	3392	5320	3148	4720	5611	7117	5266	3617	15849	4388	3973	5420	2724	2866	3056	3763	2894	3379	4876	4360	3789	5153	2167	6732	3523
MA0466.4	CEBPB	1527	2014	5020	3126	1078	3265	4230	3886	2476	3766	1268	1230	1158	6480	2793	1972	1240	1335	8060	4363	1590	888	955	856	1333	727	1035	1320	1604	1067	793	3206	970	788	1067	578	652	719	699	684	741	950	929	903	1114	570	1223	664
MA0467.3	Crx	0	0	0	0	0	0	0	0	0	0	0	0	0	0	0	0	0	0	0	0	0	0	0	0	0	0	0	0	0	0	0	0	0	0	0	0	0	0	0	0	0	0	0	0	0	0	0	0
MA0468.1	DUX4	2911	5379	8778	6833	2575	9108	11415	10427	8381	10975	4735	5264	5121	9345	8313	3880	5020	2691	21235	11859	3712	2953	3063	2422	3716	2368	3305	3853	5249	3676	2787	11699	3229	2835	3814	2166	2052	2303	2758	2185	2701	3493	3316	2784	3802	1587	4985	2429
MA0469.4	E2F3	606	1687	6133	3872	1276	3179	4216	3658	2102	3941	731	977	750	2935	2386	1394	846	779	8386	4421	910	511	435	490	655	329	478	720	824	626	457	1987	574	493	660	329	340	367	337	268	419	954	492	455	570	293	863	423
MA0470.3	E2F4	549	1197	4377	2528	370	1694	2457	1873	812	2006	388	361	445	1986	1068	1109	585	337	5447	2440	794	188	150	177	220	111	177	224	271	228	120	516	189	159	199	101	191	125	97	92	143	160	171	171	197	112	267	108
MA0471.3	E2F6	1062	4025	8898	3672	2515	8699	11774	9995	6240	11183	2823	3205	3265	9891	7057	6981	3163	2414	37165	11486	4367	2519	2105	2023	3267	1703	2236	3341	4491	3226	1740	8729	2478	2019	3254	1403	2103	1747	2080	1674	1731	2908	2735	2209	2888	1214	3993	1891
MA0472.2	EGR2	1272	2229	7634	2412	832	3811	5879	4799	3051	4819	1106	1204	1236	5125	3176	1932	1378	920	21328	5932	2048	697	991	926	1495	647	1069	1492	1639	1319	729	3162	1246	690	1176	651	964	787	662	807	758	963	920	749	1317	613	1418	614
MA0473.4	ELF1	4617	8926	18477	9630	3435	18408	23838	21060	17091	23240	4921	5583	5819	20053	15262	9428	5646	5866	54341	23628	8622	5217	5212	4402	6237	3961	5711	7211	10457	7840	4764	22561	6240	5372	7941	3879	3855	4274	5287	4294	4620	7168	6546	5047	6571	2990	9418	4716
MA0474.4	Erg	4694	9706	18640	10508	4251	20021	25994	23130	18320	25356	6326	6906	7285	22550	16980	10220	7177	6138	59013	26071	10039	5978	5981	5133	7176	4461	6332	8431	11417	8461	5464	24947	7184	5760	8429	4337	4578	4780	5751	4703	5159	7848	7168	5747	7370	3495	10353	5204
MA0475.3	FLI1	1612	2236	6559	3388	1019	4134	6118	4947	2843	5089	1818	1927	2364	5596	3733	3290	2043	1428	15895	5815	1743	910	812	922	1044	620	870	1141	2109	1214	805	3058	1130	772	1160	694	669	783	721	725	724	955	958	918	1087	636	1377	653
MA0476.2	FOS	2398	4166	6577	3961	2287	9107	11526	10434	6630	11068	2927	3317	3237	9547	7985	3635	3348	2210	20667	11919	3912	2576	2646	2194	3431	2149	2847	3603	4660	3571	2507	9902	3281	2406	3649	2002	1848	2212	2533	2124	2390	3085	3000	2557	3490	1566	4155	2288
MA0477.3	FOSL1	2531	5383	6393	4136	2272	10255	13140	11849	7370	12564	3052	3556	3395	10642	9165	3927	3434	2364	23282	13445	3959	2906	2911	2403	3792	2377	3125	3980	5144	3984	2687	11133	3605	2634	4078	2230	2077	2484	2736	2324	2615	3466	3266	2796	3885	1677	4662	2508
MA0478.2	FOSL2	2412	6008	7540	4460	2066	10619	13163	12099	7901	13199	3252	4657	3569	10878	9090	4059	3772	2372	25973	13820	4276	2857	2778	2279	3609	2168	3006	3856	4813	3828	2650	11109	3433	2645	3811	2051	1891	2282	2750	2240	2489	3773	3104	2711	3637	1634	4525	2388
MA0479.2	FOXH1	3676	7042	14244	7454	3525	10324	13477	11942	8091	12655	3589	4122	3954	10504	8913	4874	4051	3141	25777	13159	4409	3001	3066	2608	3995	2414	3397	4126	5596	4119	2768	12104	3416	3005	4243	2199	2168	2364	2968	2304	2658	3794	3517	3008	3923	1648	5342	2765
MA0480.3	Foxo1	2985	5801	12070	6347	2154	9133	11351	10513	6710	11360	2390	2568	3239	9205	6940	4054	2840	2226	21405	12116	3227	2363	2807	2237	3370	2246	2955	3511	4139	3236	2382	9227	2869	2366	3461	1851	1643	1977	2234	1987	2273	2873	2906	2618	3381	1558	4062	2119
MA0481.4	FOXP1	2985	5801	12070	6347	2154	9133	11351	10513	6710	11360	2390	2568	3239	9205	6940	4054	2840	2226	21405	12116	3227	2363	2807	2237	3370	2246	2955	3511	4139	3236	2382	9227	2869	2366	3461	1851	1643	1977	2234	1987	2273	2873	2906	2618	3381	1558	4062	2119
MA0482.3	GATA4	1994	4279	8460	6975	2119	7908	9541	8502	7375	9720	3306	3363	3721	8127	6528	3576	3734	2642	20419	9997	3332	2684	2793	2312	3489	2054	2875	3582	4666	3292	2549	9679	3100	2337	3387	1962	1979	2145	2280	2064	2402	3045	2730	2549	3423	1585	4161	2096
MA0483.2	Gfi1B	3835	8113	16377	9992	4297	16487	20556	18409	14452	19772	5143	6129	5588	17966	14976	9202	5651	4595	39350	20806	6646	6114	5828	4844	7451	4479	6212	8128	11272	8033	5719	25354	6834	6004	8373	4275	4041	4771	5787	4732	5427	7700	6878	5822	7144	3214	10341	5462
MA0484.3	HNF4G	4937	8902	13069	7310	3522	12620	15780	14218	10364	15390	4995	5569	5718	13114	11725	6856	5618	4176	34983	16516	5630	3680	3569	2980	4635	2830	3717	4934	6628	4822	2975	14231	3894	3470	4976	2366	2535	2681	3256	2479	2850	4473	4090	3334	4582	2032	5924	3088
MA0485.3	HOXC9	1891	3463	5952	3851	1387	4362	5093	4480	3939	5409	2704	2867	3079	4847	3676	1911	3041	1301	9798	5122	1618	1405	1597	1284	2038	1268	1780	2216	2529	1934	1362	5777	1771	1489	2057	1076	1227	1333	1345	1109	1345	1710	1748	1450	2007	916	2486	1287
MA0486.2	HSF1	1786	3252	10941	6181	1928	5772	7528	6374	4303	7045	2410	2540	2834	6410	5298	3216	2852	2568	16779	7401	2978	1761	1886	1580	2496	1537	2066	2678	3740	2618	1642	8420	2154	1923	2817	1469	1419	1557	1854	1451	1650	2472	2400	1681	2468	1119	3558	1773
MA0488.2	JUN	3524	5935	14556	5809	2358	8866	11689	10496	7960	11295	2819	3471	3075	9693	8410	4116	2974	2568	24799	12105	3796	2592	2742	2212	3348	2103	2871	3554	4615	3650	2682	10818	3261	2508	4115	2263	1823	2330	2502	2196	2542	3356	3025	2674	3495	1413	4365	2252
MA0489.3	Jun	2592	5896	6880	4076	2264	11221	14056	12699	7744	13533	3278	4413	3692	11279	10074	4235	3891	2617	26844	14570	4131	2946	3042	2486	3983	2406	3278	4186	5502	4255	2860	11979	3860	2834	4278	2341	2097	2580	2933	2446	2694	3634	3471	2866	4175	1755	4953	2714
MA0490.3	JUNB	2676	5509	6982	4457	2423	10528	13430	12018	7732	12937	3327	3729	3636	10937	9311	4062	3629	2459	23600	13806	4271	3061	2990	2554	3947	2508	3228	4079	5303	4090	2772	11518	3644	2756	4202	2260	2156	2486	2889	2395	2691	3582	3381	2934	4018	1740	4841	2556
MA0491.3	JUND	2645	5551	6983	4360	2389	10489	13403	11943	7719	12904	3298	3647	3599	10864	9325	4014	3600	2447	23625	13712	4125	3032	2948	2525	3892	2486	3196	4058	5306	4073	2715	11501	3617	2735	4168	2241	2137	2469	2853	2383	2656	3556	3351	2914	3999	1733	4814	2565
MA0492.2	JUND	3515	6612	14985	6486	2292	8525	11808	10275	7412	10778	2798	3524	3226	9634	7997	3837	3059	2414	23372	11648	3495	2372	2523	1993	3221	1969	2627	3364	4356	3359	2644	10130	3123	2325	3854	2136	1677	2194	2241	2020	2566	3038	2838	2441	3369	1333	4122	2053
MA0493.3	KLF1	2459	7833	13893	7802	2599	14761	20948	18422	12503	19550	4841	6007	6124	17844	12774	8413	5978	3551	74633	20937	5896	2474	2253	1750	3209	2062	2523	3827	5517	3870	1894	10295	2749	2465	3822	1636	1301	1796	2301	1842	1813	3388	3215	2145	3363	1156	4499	2126
MA0494.2	Nr1h3::Rxra	1875	3575	7931	5108	1629	7546	9871	8893	7281	9473	1983	2538	2217	8259	7742	4914	2291	1945	25762	10017	3516	1923	1887	1627	2537	1627	2124	3059	3670	2713	1960	8627	2470	1793	2791	1443	1437	1656	1853	1530	1818	2462	2214	2007	2578	1063	3574	1690
MA0495.4	MAFF	3641	6799	12802	8383	3058	12596	16201	14328	11504	15584	4274	5273	4596	13288	10886	5630	4818	3833	29348	16289	5331	4469	4378	3756	5760	3579	4857	5843	7677	5723	4288	17592	5146	4104	5908	3402	2973	3706	4018	3576	4129	5219	4894	4237	5541	2485	7153	3639
MA0496.4	MAFK	2553	7172	10320	5480	2235	13929	17449	15678	11014	16732	3863	5250	4089	13880	12167	6306	4149	3287	38014	17702	5106	3915	3838	3166	4920	3016	4092	5173	7174	5480	3542	16230	4571	3723	5427	2878	2531	3081	3733	3157	3394	5137	4456	3730	4999	2116	6561	3528
MA0497.2	MEF2C	5336	11795	21351	12685	4568	14943	19084	17390	12887	17929	6561	6964	7404	19024	13965	7854	7306	4674	39278	19974	6583	4865	6173	4883	6959	4386	6809	7856	9930	6894	4833	22174	6068	5300	7283	4017	4211	4260	5191	3808	4823	6434	6017	4884	6840	3239	9686	4724
MA0498.3	MEIS1	0	0	0	0	0	0	0	0	0	0	0	0	0	0	0	0	0	0	0	0	0	0	0	0	0	0	0	0	0	0	0	0	0	0	0	0	0	0	0	0	0	0	0	0	0	0	0	0
MA0499.3	MYOD1	3730	8657	18789	8555	3241	18147	23350	20716	17370	22420	4575	4898	4803	21978	15186	8733	5087	5192	60566	23404	8072	4780	5375	4301	6874	4082	5722	6792	10553	7692	4767	23389	6350	5515	7029	3778	3427	4299	5285	4477	4663	7219	6234	4503	6605	2744	9493	4936
MA0500.3	MYOG	5160	11496	23622	12752	5690	31488	38424	34306	31104	38704	6970	9854	7466	35846	27524	14422	7988	9620	97592	39082	13410	9086	10222	8250	13040	7648	11022	12932	19270	14866	9298	44712	12260	10522	13086	7340	6554	8036	10312	8860	8942	14152	12054	8918	12152	5116	18566	9784
MA0501.2	MAF::NFE2	2639	4897	8515	4843	2231	10283	13182	11594	8662	12807	2794	3030	3119	10905	9491	5330	3229	2970	26317	13755	4351	3330	3346	2828	4277	2568	3615	4401	5539	4277	2984	12884	3871	3045	4469	2561	2396	2733	2967	2561	3058	3960	3534	3136	4190	1860	5237	2809
MA0502.3	NFYB	2371	9265	11538	9293	2758	13668	17914	16510	9289	16413	4057	4793	4232	14493	10607	7907	4242	3278	47754	18388	5368	2062	2025	1873	2892	1660	2125	3131	3693	2973	1954	8164	2618	2142	3028	1630	1701	1750	1834	1584	1776	2924	2418	2079	2850	1200	3438	1920
MA0504.2	NR2C2	2089	8272	13671	5794	2101	11909	16016	14259	11520	15039	2795	4247	3490	13906	11107	6701	3384	2843	45275	16731	4863	2903	2975	2423	3929	2221	3407	4496	5341	4063	2387	12719	3223	2779	4303	1896	2144	2230	2685	2177	2338	3867	3439	2714	3769	1589	4999	2556
MA0505.3	Nr5a2	2459	5956	10000	5376	3477	10528	13986	12793	10162	13387	4176	5191	5188	10809	9134	5491	5185	3161	39248	14429	5239	3961	3174	2485	4105	2621	3378	4787	5800	4611	2932	12949	3718	3241	5008	2419	2241	2458	3101	2327	2823	4225	3803	3770	4603	1707	5493	2860
MA0506.3	Nrf1	1151	2941	15133	4483	855	5135	8570	5884	5170	6639	1899	1975	1753	7978	4572	4141	1704	1737	30471	7020	3638	1530	1491	1662	2188	883	1663	1686	2406	1981	954	4812	1824	948	1531	860	1956	1097	999	1125	995	1500	1429	1358	1807	927	2395	856
MA0507.3	POU2F2	4184	6954	12844	9973	3395	11345	13828	13038	9918	13790	4610	5108	4994	17977	9887	5249	4764	3533	28228	14863	5491	3406	3921	3318	4729	2938	4189	4796	6131	4549	3296	14507	4013	3223	4756	2624	2719	2805	3272	2621	3196	4051	3968	3387	4699	2106	6150	2934
MA0508.4	PRDM1	3850	6656	12046	6343	3929	12875	15985	14527	10493	15819	5650	5842	6886	13642	13969	6954	6942	4333	31490	16457	7632	4589	4775	4147	6125	3524	5219	6438	7736	5912	4276	17458	5305	4309	6119	3516	3351	3810	4043	3673	4140	5359	4973	4561	5886	2994	7100	3510
MA0509.3	RFX1	1242	2988	4596	4402	1167	4935	6370	5711	4464	6496	1459	1659	1734	5216	4502	2393	1711	2285	17922	6586	2232	1381	1400	1167	1907	1063	1477	2007	2356	1802	1411	5558	1748	1189	2007	1085	948	1197	1252	1183	1318	1545	1556	1310	1871	783	2222	1106
MA0510.3	RFX5	1738	4605	7343	6515	2065	7644	9642	8932	6696	10073	2311	2630	2610	7879	6737	3584	2783	3350	23495	10433	3307	2257	2203	1818	2889	1650	2347	3150	3685	2854	2046	8596	2623	1926	3036	1611	1510	1809	1928	1780	1991	2452	2446	2141	2727	1196	3555	1734
MA0511.2	RUNX2	1681	3308	10788	4085	1615	5129	6650	5850	4212	7148	2129	2188	2573	5565	4289	4514	2502	1432	16145	6920	2426	1920	1828	1503	2459	1474	1992	2657	3185	2275	1606	6659	2004	1655	2323	1275	1198	1414	1550	1358	1508	2023	1942	1800	2362	1042	2779	1370
MA0512.2	Rxra	2082	5298	9124	5199	1967	7655	10179	8982	6725	9659	2206	3008	2469	8352	6963	4714	2571	2065	25518	10493	3408	2097	2216	1815	2797	1656	2518	3116	3865	2832	1784	8817	2307	2018	2959	1385	1545	1521	1962	1468	1669	2722	2512	2049	2746	1232	3608	1773
MA0514.3	Sox3	2479	4487	11298	6766	2365	9146	12143	11257	6390	11326	3429	4509	3644	9106	8839	4404	3688	2701	27196	12944	3706	1695	1862	1285	2237	1345	1882	2328	3220	2434	1644	6772	1927	1840	2439	1300	963	1466	1659	1326	1574	2265	2151	1860	2364	885	2881	1647
MA0515.1	Sox6	4994	9083	14689	11175	4571	16856	21916	19840	13276	21450	6024	6196	6872	17546	14744	8031	6619	5191	39675	22502	7333	4811	5380	4134	6429	3892	5904	6837	9144	6688	4854	20022	5936	4840	6803	3819	3269	4226	4749	4022	4642	6267	5845	4848	6305	2771	8435	4261
MA0516.3	SP2	1696	8043	13048	6054	3303	14051	19542	16551	10243	17167	3700	4834	4790	17522	11692	8221	4529	3349	67513	19043	5964	3226	2416	2185	3608	2108	2626	4069	5045	3694	1977	9932	2955	2313	3857	1605	1849	1943	2184	1906	1914	3177	3006	2569	3613	1391	4146	1999
MA0517.2	STAT1::STAT2	5734	18087	20250	12098	4816	17948	22193	19958	16370	22768	8287	8349	9482	19476	16686	9392	9378	6179	44548	23029	8676	6873	8312	6203	9867	5965	8629	10193	12709	9338	6969	30310	8649	6794	9813	5622	5497	5936	6737	5534	6660	9370	8052	7018	9005	4333	12288	6053
MA0518.2	Stat4	3422	8053	17271	9717	4135	13820	18132	15910	12991	17750	6086	6896	6746	15553	12919	7669	6903	5259	34749	18352	8513	5131	5755	4792	7159	4292	6334	7739	10450	7686	5019	23723	6146	5246	7922	4131	4067	4567	5554	4105	4948	6995	6327	5087	6817	3279	9701	4803
MA0519.2	Stat5a::Stat5b	2835	6814	13119	7491	3694	12844	16191	14795	11324	16615	5124	5704	5707	14366	11291	7213	5915	4588	33929	17272	7667	4301	4776	4089	6037	3809	5274	6739	9324	7073	4260	21321	5525	4693	6927	3449	3486	4007	4958	3558	4144	6477	5834	4512	5938	2832	8744	4337
MA0520.2	Stat6	3451	7262	12291	12749	3882	13994	18009	16229	11657	17141	6191	6630	6871	15724	12880	7496	6706	4588	31654	18550	7774	5100	5764	4902	7247	4423	6283	7760	10236	7620	5118	22636	6776	5409	7482	4214	3961	4763	5413	4471	5427	7037	6389	5196	7055	3216	9667	4977
MA0521.3	Tcf12	0	0	0	0	0	0	0	0	0	0	0	0	0	0	0	0	0	0	0	0	0	0	0	0	0	0	0	0	0	0	0	0	0	0	0	0	0	0	0	0	0	0	0	0	0	0	0	0
MA0522.4	TCF3	2671	6047	14448	4797	1785	11053	13982	12612	11777	13802	2541	2787	2717	12602	9307	5551	2738	3391	42949	14043	5466	3114	3809	2940	4849	2624	4045	4930	6426	5126	3043	14787	4128	3399	4952	2527	2859	2784	3226	2926	2856	4577	4094	3065	4316	1984	5828	2946
MA0523.2	TCF7L2	3760	7085	9933	6651	4576	12301	15309	14070	10679	15048	4834	5231	5334	13851	12246	6372	5481	4496	28836	16088	5765	4224	4565	3790	5714	3628	4967	6147	7308	5622	4024	16511	4950	3969	5823	3143	3146	3474	3952	3326	3899	5002	4738	4209	5606	2636	6964	3528
MA0524.3	TFAP2C	1636	6533	13954	8533	2283	14297	20732	17426	14975	18202	2524	4324	3108	19828	13098	6230	3009	3227	62050	20181	6881	2983	3630	3031	4593	2537	4077	5025	6939	4986	2650	14201	4221	3411	5077	2459	2968	2752	3082	2752	2617	5050	4323	3087	4238	1682	6282	2977
MA0525.2	TP63	1293	2274	5743	2680	857	4273	5161	4661	4255	5188	1059	1241	1182	4183	3282	2000	1148	1250	11042	5580	2174	1420	1354	1110	1853	1085	1468	1946	2010	1605	1138	5357	1513	1062	1731	988	884	1044	1089	1019	1095	1421	1307	1391	1700	770	2040	907
MA0526.5	USF2	1705	3030	11840	3790	1493	4623	6075	5348	3925	5489	3732	4451	4350	5504	4040	5481	4250	1047	14648	6114	1837	872	1272	997	1668	936	1364	1792	1720	1668	995	4051	1672	946	1747	934	1087	1252	907	1092	1176	1387	1300	1068	1559	899	1529	826
MA0527.2	ZBTB33	504	598	3706	749	316	1277	1910	1310	717	2009	471	295	360	1544	1071	778	487	242	5692	1717	624	756	367	444	546	195	409	395	649	389	231	893	432	187	373	197	482	295	197	217	263	314	278	376	447	214	428	144
MA0528.3	ZNF263	4292	11294	18312	8882	4200	19843	27420	24000	18882	25175	5491	5894	5440	24379	16753	9864	5385	5237	74798	27125	8407	5698	5357	4711	7461	4026	5891	8246	10621	8238	4614	23539	6252	5602	8126	3978	4591	4120	5305	4297	4337	7472	6690	5476	6712	3040	9730	5099
MA0591.2	Bach1::Mafk	2258	4806	9552	4495	1852	10301	13182	11800	8737	12724	2633	2665	2495	10759	8738	5186	2766	2563	28966	13557	4000	3163	3243	2718	4138	2432	3436	4228	5691	4214	2922	13041	3714	2945	4389	2554	2393	2667	2929	2597	2845	4041	3526	3055	4168	1759	5212	2684
MA0592.4	ESRRA	2544	6149	12624	5866	3156	10070	14363	12464	9437	12682	3400	4039	3973	10349	9508	5877	3996	2907	34478	13875	4689	3453	3090	2434	3967	2467	3351	4672	5787	4319	2919	12507	3778	3043	4621	2330	2207	2502	3000	2352	2868	3892	3638	3485	4083	1693	5315	2706
MA0593.2	FOXP2	5068	11722	15898	11683	3810	14811	19215	16903	11202	18657	5024	5504	6158	14921	11937	7144	5764	4045	35075	19289	5553	4234	5114	4117	6062	3955	5563	6393	8091	6199	4544	18350	5406	4532	6385	3587	3205	3814	4324	3607	4186	5452	5317	4697	6051	2759	8121	4037
MA0594.3	HOXA9	377	409	1385	845	216	511	648	645	433	554	592	767	834	771	468	324	796	165	1809	759	226	163	175	163	252	143	180	269	161	172	137	444	206	118	175	131	117	152	95	150	140	111	155	186	231	151	181	86
MA0595.1	SREBF1	2143	3996	10444	4372	1777	8835	11612	10105	7346	11324	2450	3148	2657	8441	7723	4062	2757	2600	26153	11626	3598	2573	2319	1873	3113	1829	2579	3517	4568	3356	2363	10318	2891	2398	3492	1899	1548	1935	2363	2014	2204	3114	2968	2264	2956	1275	4166	2155
MA0596.1	SREBF2	2868	4676	9678	4958	2039	10674	14146	12485	9254	13672	2640	3106	2748	10295	9354	4773	2850	3116	30076	14180	4354	3039	2854	2344	3750	2274	3169	4310	5532	4031	2781	12318	3421	2893	4293	2182	1836	2322	2751	2378	2541	3739	3510	2865	3587	1513	5076	2565
MA0597.3	THAP1	3335	9395	19455	12645	2930	17071	22143	19543	17822	21395	4038	5177	4247	20398	16114	9206	4164	4652	67995	22663	8492	4818	4971	3978	6327	3812	5359	7115	9893	7127	4150	21493	5654	5327	7338	3360	3978	3831	4647	3959	3976	7064	6050	4622	6281	2594	9370	4808
MA0598.4	EHF	4162	7640	13948	7599	3364	16208	21537	18798	15198	20143	4723	5460	5343	18290	14024	8696	5321	5129	47918	21055	7829	4817	4488	3870	5504	3476	4802	6455	8988	6715	4257	19005	5534	4543	6907	3445	3454	3719	4588	3764	4184	6054	5673	4498	5669	2762	8086	3996
MA0599.1	KLF5	2623	11314	16893	10242	3945	21690	29853	25949	17608	27373	6983	8243	8147	25561	17759	11736	8031	5244	103097	29672	8484	4295	3617	2905	5287	3292	4039	5992	8335	6045	3017	17616	4236	4135	6153	2425	2262	2775	3815	2838	2861	5492	5111	3733	5228	1989	7289	3713
MA0600.3	RFX2	1515	4166	6048	6259	1658	6607	8742	7866	6143	8736	2143	2451	2505	7149	6219	3421	2619	3027	21357	9327	3002	2025	1997	1652	2694	1569	2085	2832	3378	2539	1923	7635	2382	1755	2787	1558	1354	1694	1739	1625	1856	2200	2154	1901	2587	1137	3174	1554
MA0601.2	Arid3b	0	0	0	0	0	0	0	0	0	0	0	0	0	0	0	0	0	0	0	0	0	0	0	0	0	0	0	0	0	0	0	0	0	0	0	0	0	0	0	0	0	0	0	0	0	0	0	0
MA0602.2	Arid5a	3126	4840	11971	7449	3396	7276	9510	8540	6391	9077	3616	3891	4270	8262	6601	3553	4187	2239	18803	9621	3135	2118	2486	2150	3057	1886	2779	3074	3870	2785	1915	8863	2322	2050	3065	1509	1928	1692	2245	1590	1915	2657	2400	2191	2920	1292	3991	2012
MA0603.2	Arntl	1335	1880	9951	2323	383	3761	4654	4268	3492	4235	1489	1701	1519	4427	3049	2012	1494	807	13433	4864	1467	876	1430	1009	1792	873	1432	1916	1629	1539	1075	4006	1689	909	1698	992	1220	1180	832	1190	1154	1344	1218	1016	1481	867	1518	765
MA0604.1	Atf1	1180	1529	6728	1719	430	1930	2855	2392	1485	2205	841	601	880	2273	1966	1088	714	480	6454	2725	770	656	588	457	813	405	597	830	672	613	571	1510	888	351	620	586	453	570	375	517	493	463	526	562	771	381	678	266
MA0605.3	ATF3	3421	5678	13872	6706	1592	6815	9295	8141	5573	8236	2067	2295	2374	7436	6072	3462	2384	1760	16527	9555	2826	1889	2012	1553	2675	1720	2061	2536	3349	2658	2047	7810	2473	1802	3655	1801	1235	1847	1795	1645	1976	2396	2308	1953	2706	1044	3270	1582
MA0606.3	Nfat5	6558	17178	24865	16611	7470	24839	31259	28837	23054	30458	10311	10685	11226	28979	23955	12397	11078	8211	55791	32592	12444	9495	10560	8427	12901	7761	11196	14144	18957	14124	9105	42498	11308	10326	14305	7280	7428	8083	10106	7420	8775	13449	12014	9415	12311	5752	18211	9086
MA0607.2	BHLHA15	2352	5470	9878	6484	2418	8410	10070	9364	7346	10100	2902	3002	3458	9186	7218	4692	3226	2836	26366	10828	3992	2384	2658	2294	3088	1980	2658	3202	3970	2908	2280	8760	2680	2002	3140	1774	1762	1900	2066	1966	2176	2638	2572	2464	3064	1404	3642	1782
MA0608.1	Creb3l2	1186	1811	7139	2475	472	3094	4151	3432	2733	3308	904	945	1097	4159	2742	2380	1135	726	12841	3869	1282	744	1127	801	1397	736	1267	1731	1389	1276	900	3494	1418	740	1408	761	884	971	723	996	1001	1017	1101	934	1259	632	1264	591
MA0609.3	CREM	2848	3814	14734	4710	1186	5732	7640	6586	4498	7134	1448	1620	1624	6194	4856	3014	1632	1514	16040	8096	2186	1378	1670	1284	2240	1278	1686	2246	2856	2188	1698	6442	2112	1484	3202	1502	1104	1548	1462	1334	1702	2076	1966	1598	2290	892	2658	1262
MA0610.2	DMRT3	2232	4193	11384	6566	2003	7718	9865	8596	6471	9593	2557	2895	2812	7969	6366	2925	2826	2423	15787	9746	2978	2561	2534	2210	3406	2136	2816	3258	3858	3238	2373	9005	2794	2048	3241	1746	1499	2048	2326	1998	2278	2726	2491	2439	3358	1408	3655	1871
MA0611.3	Dux	2941	4693	9312	6377	2625	8877	11342	10249	8662	10527	3980	3964	4290	9132	8779	3571	4270	2622	21053	11241	3649	2706	2917	2333	3444	2333	3044	3886	5058	3588	2585	11370	3121	2699	3675	2055	1958	2289	2669	2065	2448	3415	3040	2575	3393	1529	4762	2312
MA0612.3	EMX1	0	0	0	0	0	0	0	0	0	0	0	0	0	0	0	0	0	0	0	0	0	0	0	0	0	0	0	0	0	0	0	0	0	0	0	0	0	0	0	0	0	0	0	0	0	0	0	0
MA0613.1	FOXG1	3916	8420	15550	8221	3034	10723	13562	12527	7671	13256	3735	4157	4746	10590	8528	4971	4264	2932	26004	14329	4101	2879	3409	2678	4007	2612	3672	4195	5299	4006	2930	11815	3510	3031	4212	2328	2113	2459	2807	2411	2725	3655	3516	3056	4019	1861	5273	2699
MA0614.1	Foxj2	3866	8483	15806	8123	3116	10714	13629	12589	7502	13110	3977	4275	4891	11310	8542	5191	4415	2967	25923	14243	4171	2783	3263	2605	3865	2536	3588	4122	5105	3900	2850	11366	3421	2932	4072	2276	2076	2433	2722	2388	2617	3542	3351	2966	3906	1776	5121	2587
MA0615.2	Gmeb1	0	0	0	0	0	0	0	0	0	0	0	0	0	0	0	0	0	0	0	0	0	0	0	0	0	0	0	0	0	0	0	0	0	0	0	0	0	0	0	0	0	0	0	0	0	0	0	0
MA0616.3	HES2	1147	1657	8774	2206	377	3530	5097	4436	3904	4563	956	893	1002	5314	2820	2175	945	794	15648	5114	1865	706	1284	1167	1597	711	1326	1689	1482	1402	858	3415	1475	718	1429	831	1381	978	708	1039	967	1100	1009	829	1298	819	1333	589
MA0618.2	LBX1	2585	4313	7463	6451	1932	7301	10744	8454	8106	8691	2619	3060	3162	8342	6488	2831	3080	2265	14931	9563	2725	2113	2610	2206	3147	1943	2815	3596	4303	3089	2330	9463	2631	2435	3376	1729	1827	1986	2357	1824	2120	2949	2708	2237	3063	1473	4188	2145
MA0619.2	LIN54	5292	11298	15500	10237	4839	14201	18502	16423	12305	17807	7017	7857	7954	18090	15114	7966	8291	4997	34002	18603	6483	4287	4683	4252	5765	3630	5202	6342	7948	5878	4093	17448	5109	4360	6000	3399	3451	3644	4226	3284	4122	5297	5037	4366	5714	2844	7685	3875
MA0620.4	MITF	2396	4122	13028	5268	2152	8100	11162	9732	6454	10234	4924	5746	5616	8990	8664	6862	5422	1834	19484	11320	3220	1702	1844	1610	2374	1418	1880	2318	2816	2468	1448	6230	2152	1468	2570	1298	1200	1610	1492	1448	1520	2116	1858	1606	2296	1120	2584	1394
MA0621.2	mix-a	0	0	0	0	0	0	0	0	0	0	0	0	0	0	0	0	0	0	0	0	0	0	0	0	0	0	0	0	0	0	0	0	0	0	0	0	0	0	0	0	0	0	0	0	0	0	0	0
MA0622.2	Mlxip	0	0	0	0	0	0	0	0	0	0	0	0	0	0	0	0	0	0	0	0	0	0	0	0	0	0	0	0	0	0	0	0	0	0	0	0	0	0	0	0	0	0	0	0	0	0	0	0
MA0623.2	NEUROG1	2266	3621	8505	5710	1972	6854	8832	8114	6515	8614	2232	2203	2455	7779	6101	3974	2393	2117	19851	9437	3181	2067	2165	1914	2752	1689	2288	2737	3101	2482	1767	7411	2295	1667	2685	1444	1562	1578	1840	1586	1663	2243	2118	2149	2735	1272	3128	1524
MA0624.3	Nfatc1	0	0	0	0	0	0	0	0	0	0	0	0	0	0	0	0	0	0	0	0	0	0	0	0	0	0	0	0	0	0	0	0	0	0	0	0	0	0	0	0	0	0	0	0	0	0	0	0
MA0625.3	NFATC3	0	0	0	0	0	0	0	0	0	0	0	0	0	0	0	0	0	0	0	0	0	0	0	0	0	0	0	0	0	0	0	0	0	0	0	0	0	0	0	0	0	0	0	0	0	0	0	0
MA0626.2	Npas2	1441	2717	12535	2473	542	4668	6219	5468	5316	5397	1252	1069	1285	6314	3843	1780	1105	1041	19914	5922	2239	1182	2014	1341	2288	1206	2078	2717	2376	2300	1424	5969	2362	1268	2461	1352	1779	1465	1229	1610	1483	1766	1742	1398	2031	1092	2268	1089
MA0627.3	POU2F3	6051	9734	16429	12857	4537	15568	19564	18099	13604	19441	6421	7156	6749	23037	13526	8847	6678	5734	38452	20656	8712	5269	5509	4920	7331	4305	5997	7228	9155	6833	4992	20727	5912	4790	7053	3811	4006	4267	4879	3973	4890	6099	5864	5171	6750	3233	8938	4401
MA0628.2	POU6F1	0	0	0	0	0	0	0	0	0	0	0	0	0	0	0	0	0	0	0	0	0	0	0	0	0	0	0	0	0	0	0	0	0	0	0	0	0	0	0	0	0	0	0	0	0	0	0	0
MA0629.2	Rhox11	2650	5183	10901	6165	1793	7998	9979	8831	6620	9894	2582	2837	2916	8218	7069	3983	2923	2267	17773	10395	2969	2969	2991	2554	3968	2343	3400	4157	4740	3729	2955	11175	3458	2564	3598	2146	1978	2444	2662	2461	2670	3288	3103	2780	3647	1721	4522	2333
MA0630.2	SHOX	0	0	0	0	0	0	0	0	0	0	0	0	0	0	0	0	0	0	0	0	0	0	0	0	0	0	0	0	0	0	0	0	0	0	0	0	0	0	0	0	0	0	0	0	0	0	0	0
MA0631.2	Six3	1571	3342	7679	5019	1248	5348	6898	6335	5185	6609	1824	2251	2021	6194	4716	2267	2014	1441	15557	7437	2210	1502	1591	1412	2012	1296	1727	2143	2692	2098	1367	5854	1745	1384	2227	1171	1013	1166	1338	1178	1382	1685	1687	1480	2044	904	2524	1177
MA0632.3	TCFL5	771	1137	8332	1628	324	2604	3897	2855	2381	3097	739	777	807	3161	1961	1837	796	874	11664	3246	1857	434	693	952	1014	369	785	849	896	791	478	1737	876	327	739	454	1275	600	344	642	532	568	488	455	795	605	814	296
MA0633.3	Twist2	0	0	0	0	0	0	0	0	0	0	0	0	0	0	0	0	0	0	0	0	0	0	0	0	0	0	0	0	0	0	0	0	0	0	0	0	0	0	0	0	0	0	0	0	0	0	0	0
MA0634.2	ALX3	0	0	0	0	0	0	0	0	0	0	0	0	0	0	0	0	0	0	0	0	0	0	0	0	0	0	0	0	0	0	0	0	0	0	0	0	0	0	0	0	0	0	0	0	0	0	0	0
MA0635.2	BARHL2	0	0	0	0	0	0	0	0	0	0	0	0	0	0	0	0	0	0	0	0	0	0	0	0	0	0	0	0	0	0	0	0	0	0	0	0	0	0	0	0	0	0	0	0	0	0	0	0
MA0636.1	BHLHE41	1119	1668	7327	1966	346	3333	4317	3936	2931	3931	1465	1898	1706	4026	2890	2323	1778	675	12805	4430	1312	673	1091	844	1446	658	1098	1429	1267	1307	807	2977	1239	658	1281	757	964	944	637	894	817	995	893	764	1106	736	1131	569
MA0638.2	CREB3	1092	1544	7829	1778	467	2410	3572	2861	1872	2983	762	753	859	2798	2439	1648	842	516	8349	3234	1024	636	866	564	1072	569	887	1149	1189	908	721	2541	1083	578	946	678	564	757	517	656	731	705	793	670	955	508	955	428
MA0639.2	DBP	1754	2545	6244	4409	1278	4531	5711	5373	3480	5342	1610	1684	1777	4762	3707	1838	1776	1186	9091	6052	1809	1102	1394	1151	1526	1018	1433	1497	2089	1648	1175	4591	1374	1115	1597	905	946	942	1163	950	1059	1390	1356	1095	1543	771	1986	1045
MA0640.3	ELF3	4553	9510	18294	9826	4101	19989	26071	23118	18349	25147	6173	6867	6970	22254	17280	10081	6941	6002	59390	25746	9535	6025	5811	4897	7000	4402	6239	8303	11103	8295	5374	24192	7009	5740	8400	4257	4393	4658	5707	4679	5189	7727	7048	5674	7379	3414	10114	5092
MA0641.1	ELF4	2098	3098	8421	3396	1153	4914	7522	6377	4156	6002	1586	1753	1982	6209	4342	4370	1778	1710	19647	7309	2401	1123	998	991	1276	722	1096	1324	2522	1514	990	3879	1297	900	1406	810	760	905	901	870	843	1268	1180	1135	1354	735	1674	774
MA0642.3	EN2	1755	4975	7854	5374	1818	5821	7725	6837	4965	7155	2647	2950	3241	6880	5232	2810	3097	1699	17839	7692	2629	1429	1540	1278	2142	1205	1689	2232	2981	2108	1447	6064	1790	1536	2065	1090	998	1156	1463	1150	1314	1971	1765	1399	2011	814	2657	1371
MA0643.2	Esrrg	2479	4676	8481	5182	2788	9129	12858	10942	8088	11187	3170	3904	3702	9145	8908	5495	3740	2860	30228	12507	4485	2860	2805	2269	3757	2303	3033	4077	4933	3721	2543	10849	3320	2590	4163	1974	2052	2221	2578	2158	2462	3437	3199	2650	3730	1566	4574	2287
MA0644.3	ESX1	2585	4313	7463	6451	1932	7301	10744	8454	8106	8691	2619	3060	3162	8342	6488	2831	3080	2265	14931	9563	2725	2113	2610	2206	3147	1943	2815	3596	4303	3089	2330	9463	2631	2435	3376	1729	1827	1986	2357	1824	2120	2949	2708	2237	3063	1473	4188	2145
MA0645.2	ETV6	2430	3875	8553	4226	1798	7690	11385	9152	6172	9472	2231	2263	2653	10779	6814	5084	2355	2532	24880	10541	3734	1890	1651	1614	2262	1318	1825	2267	3718	2529	1763	6359	2265	1548	2415	1335	1321	1563	1529	1499	1606	2121	1994	1813	2328	1200	2876	1307
MA0646.2	GCM1	1294	3339	9631	4695	1173	6059	7996	6965	6155	7589	1936	1664	1676	7218	5151	3140	1565	2014	24952	8075	2756	1863	1889	1490	2353	1376	1983	2515	2996	2354	1617	6576	2131	1500	2203	1340	1308	1442	1524	1597	1586	2075	1788	1851	2261	944	2895	1389
MA0647.2	GRHL1	2453	4958	8862	6130	2015	9267	10637	10139	10733	11712	3286	3458	4056	9748	7284	3687	3777	2632	22871	11562	3539	2768	2455	2266	3516	2233	2749	3786	4669	3431	2034	9785	2584	2371	3810	1695	1695	1877	2337	1700	1880	2988	2870	2769	3660	1377	4233	2117
MA0648.2	GSC	0	0	0	0	0	0	0	0	0	0	0	0	0	0	0	0	0	0	0	0	0	0	0	0	0	0	0	0	0	0	0	0	0	0	0	0	0	0	0	0	0	0	0	0	0	0	0	0
MA0649.2	HEY2	1366	2198	8885	2624	547	4712	6391	5621	5160	6021	1152	1083	1201	5976	3800	2596	1177	974	18359	6445	2317	1049	1713	1410	2126	1027	1835	2349	2168	1957	1217	5250	1990	1156	2038	1162	1557	1301	1093	1405	1315	1672	1541	1218	1874	972	2006	934
MA0650.4	Hoxa13	3312	6597	20371	11308	2843	9791	13185	12505	9359	11512	4350	5488	5191	12001	10120	6071	5344	2931	28878	13417	4625	3147	3480	2903	4516	2609	3628	4395	5729	4206	2927	13012	3408	3167	4245	2181	2470	2443	3047	2199	2717	4094	3566	2991	4217	1831	5752	2829
MA0651.3	HOXC11	1314	2550	4875	3183	961	2877	3793	3225	2845	3549	2058	2300	2478	3492	2648	1331	2412	821	7334	3736	1065	949	1088	933	1412	821	1234	1544	1572	1242	906	3703	1118	927	1365	706	772	884	878	721	824	1077	1153	955	1287	635	1598	767
MA0652.2	IRF8	2628	5948	9929	5273	1888	7524	9370	8215	6462	8910	2943	3136	3348	7996	6535	3847	3389	2565	24366	9468	3488	2562	2731	2203	3424	2098	2792	3541	4364	3294	2509	10397	2968	2266	3502	1981	1793	2182	2198	1970	2306	2866	2852	2611	3282	1612	4137	2002
MA0653.1	IRF9	3269	7160	11018	6305	2369	8762	10785	9487	7850	10330	3511	3652	3993	9222	7685	4595	4092	2898	29146	10790	4066	3323	3549	2801	4399	2702	3692	4662	5900	4334	3213	14051	3712	3066	4509	2476	2263	2605	2960	2458	2884	3974	3665	3375	4161	1940	5605	2727
MA0654.2	ISX	0	0	0	0	0	0	0	0	0	0	0	0	0	0	0	0	0	0	0	0	0	0	0	0	0	0	0	0	0	0	0	0	0	0	0	0	0	0	0	0	0	0	0	0	0	0	0	0
MA0655.1	JDP2	2609	4224	6674	4414	2370	9242	12279	10870	7066	11561	3117	3436	3394	10187	8536	3670	3389	2235	19611	12249	3605	2770	2685	2332	3542	2282	2937	3731	4667	3581	2528	10148	3209	2461	3662	1958	1970	2224	2575	2116	2403	3107	3049	2620	3524	1596	4421	2272
MA0656.2	JDP2	2825	4914	12688	5185	1470	4969	6704	5921	4089	5999	1694	1894	1947	5645	4747	2740	1953	1506	14050	7002	1980	1420	1503	1129	2038	1219	1506	1953	2370	1896	1447	5509	1826	1224	2759	1419	896	1390	1267	1205	1468	1720	1649	1528	2032	788	2329	1085
MA0657.2	KLF13	1228	2568	7155	4444	904	5398	7814	6911	4152	6983	1878	2530	2636	6698	4997	2652	2454	1373	21639	8015	2237	1027	1096	783	1268	826	1110	1421	1820	1450	857	4258	1228	962	1470	644	686	840	874	740	853	1283	1212	918	1260	592	1734	773
MA0658.2	LHX6	3019	4233	7210	6452	2021	7389	10287	8674	8556	8754	2574	3108	3057	8553	6769	2869	3132	2219	14594	9669	2718	2080	2705	2197	3215	1956	2873	3766	4582	3262	2336	9899	2667	2563	3537	1784	1948	2062	2510	1869	2149	3138	2846	2269	3123	1514	4453	2314
MA0659.4	Mafg	2399	6023	10505	5323	2245	13422	15950	15027	10891	16062	3944	5293	4210	13517	11194	6149	4418	3042	35751	17304	5269	3753	3958	3322	5000	2931	4260	5244	7362	5471	3554	16814	4691	3791	5489	2997	2666	3153	3852	3232	3465	5204	4591	3708	5046	2078	6643	3499
MA0660.1	MEF2B	2849	6219	11256	9984	3075	9377	11950	10926	8219	11292	3546	3818	4188	9589	9377	4334	4155	2528	20985	12496	3688	2792	3300	2726	4036	2518	3616	4382	5130	3767	2630	11835	3267	2836	3974	2076	2389	2244	2744	2157	2535	3518	3201	2839	3807	1857	5171	2548
MA0661.2	MEOX1	2585	4313	7463	6451	1932	7301	10744	8454	8106	8691	2619	3060	3162	8342	6488	2831	3080	2265	14931	9563	2725	2113	2610	2206	3147	1943	2815	3596	4303	3089	2330	9463	2631	2435	3376	1729	1827	1986	2357	1824	2120	2949	2708	2237	3063	1473	4188	2145
MA0662.2	MIXL1	0	0	0	0	0	0	0	0	0	0	0	0	0	0	0	0	0	0	0	0	0	0	0	0	0	0	0	0	0	0	0	0	0	0	0	0	0	0	0	0	0	0	0	0	0	0	0	0
MA0663.1	MLX	1207	2035	8958	1818	390	3210	3837	3649	2817	3461	1340	1590	1393	3788	2537	2258	1355	712	10999	4186	1205	697	1134	779	1514	707	1144	1516	1262	1305	916	3225	1401	704	1402	825	924	943	640	999	965	998	996	931	1190	712	1166	654
MA0664.2	MLXIPL	1453	1895	9635	2115	428	3754	4642	4180	3580	4199	1403	1538	1486	4432	3096	2018	1443	803	13209	4800	1437	902	1434	996	1806	892	1470	2000	1681	1627	1096	4148	1744	940	1762	1028	1199	1172	889	1229	1193	1346	1283	1085	1530	855	1580	832
MA0665.1	MSC	4123	10645	16948	8822	4325	19573	24536	21592	17352	24122	5208	5983	5628	23625	16891	9285	5825	5831	53152	24429	8331	6068	6606	5333	8422	4991	7144	8566	11778	8994	5935	27525	7579	6365	8710	4690	4051	5004	6289	5273	5693	8331	7505	5849	8008	3553	11127	5639
MA0666.3	MSX1	0	0	0	0	0	0	0	0	0	0	0	0	0	0	0	0	0	0	0	0	0	0	0	0	0	0	0	0	0	0	0	0	0	0	0	0	0	0	0	0	0	0	0	0	0	0	0	0
MA0667.1	MYF6	3858	9327	12013	8209	3278	15157	18829	16933	13552	18551	5620	5763	6057	17269	13133	7402	6014	4250	40536	19039	6197	4671	5003	4203	6147	3838	5136	6348	8645	6606	4743	19205	5618	4459	6451	3590	3139	3942	4438	4041	4552	5659	5301	4406	6134	2603	7876	3945
MA0668.3	Neurod2	3975	8834	12371	8052	4080	15929	19135	17581	15013	19656	5107	5354	4970	19113	13878	8257	4816	5542	47349	20144	7404	4833	5200	4080	6372	4095	5514	6929	9326	6732	4932	19705	6218	4852	6680	3951	3376	4223	4655	4376	4730	6273	5551	4827	6296	2679	8271	4379
MA0669.1	NEUROG2	2872	4765	9702	6516	3169	9759	12182	10858	9066	11911	3351	3214	3389	11811	8209	5514	3249	2997	34290	12340	4340	2827	3085	2574	3886	2302	3230	3962	4875	3599	2622	10659	3297	2520	3794	2205	2177	2412	2603	2402	2648	3182	3112	2955	3871	1745	4420	2232
MA0670.2	NFIA	0	0	0	0	0	0	0	0	0	0	0	0	0	0	0	0	0	0	0	0	0	0	0	0	0	0	0	0	0	0	0	0	0	0	0	0	0	0	0	0	0	0	0	0	0	0	0	0
MA0671.2	NFIX	0	0	0	0	0	0	0	0	0	0	0	0	0	0	0	0	0	0	0	0	0	0	0	0	0	0	0	0	0	0	0	0	0	0	0	0	0	0	0	0	0	0	0	0	0	0	0	0
MA0672.2	NKX2-3	2794	6445	10677	5377	2285	11229	14540	12519	9617	13015	3126	3767	3504	12529	9821	4710	3542	3091	26698	14024	4660	3097	3050	2598	4079	2527	3387	4370	5156	4194	2856	11698	3477	2688	4264	2261	2194	2389	2780	2355	2678	3617	3414	2983	4044	1726	4993	2348
MA0673.2	NKX2-8	2707	5476	10143	4163	2117	10219	12839	11203	9051	12123	2744	2965	2792	11344	9034	4204	2939	3034	25029	12383	4108	3094	3021	2472	3902	2355	3216	4096	5113	4051	2739	11515	3381	2679	4214	2170	2095	2350	2728	2328	2622	3576	3339	2854	3821	1608	4882	2427
MA0674.2	NKX6-1	0	0	0	0	0	0	0	0	0	0	0	0	0	0	0	0	0	0	0	0	0	0	0	0	0	0	0	0	0	0	0	0	0	0	0	0	0	0	0	0	0	0	0	0	0	0	0	0
MA0675.2	NKX6-2	0	0	0	0	0	0	0	0	0	0	0	0	0	0	0	0	0	0	0	0	0	0	0	0	0	0	0	0	0	0	0	0	0	0	0	0	0	0	0	0	0	0	0	0	0	0	0	0
MA0676.1	Nr2e1	4197	8771	13687	9177	3155	13899	18251	15973	10686	17173	5070	5641	5835	14422	22280	5441	5751	3778	30390	18774	4919	4006	4162	3767	5618	3347	4632	5726	6592	5040	3382	14995	4314	3578	5555	2881	3056	3194	3504	2749	3359	4552	4371	3737	5432	2517	6405	3237
MA0677.2	Nr2f6	2181	5830	9423	5275	2077	8898	11420	10350	7920	10805	2370	3226	2814	9669	7552	5442	2776	2368	27139	12035	3728	2272	2409	2031	3104	1826	2717	3451	4350	3321	2005	9916	2573	2242	3537	1485	1756	1761	2179	1683	1864	3035	2879	2192	3131	1337	4073	1982
MA0678.1	OLIG2	2667	4402	10563	7118	2394	7632	9777	9314	7237	9410	2939	2991	3420	8183	6820	4583	3265	2524	19340	10698	3483	2331	2618	2268	3091	1989	2737	3206	3588	2815	2100	8394	2557	1908	3229	1647	1835	1810	2028	1839	2023	2442	2453	2355	3081	1478	3637	1765
MA0679.3	ONECUT1	3282	4907	10647	6513	2877	8855	11180	10072	7036	10575	3741	4014	4256	8732	8260	4063	4196	2457	24011	11313	3494	2157	2432	1930	3026	1832	2745	3194	4255	3030	2214	9377	2553	2202	3212	1794	1791	1866	2251	1711	2054	2791	2680	2206	3019	1357	3889	2093
MA0680.3	Pax7	4613	6651	11768	8508	2997	10305	13060	12294	8842	12395	4897	5326	5566	12236	10585	4996	5456	2755	27904	13788	4323	2798	3636	2757	4354	2728	3878	4626	6680	4589	3126	14477	3446	3473	4573	2505	2384	2565	3525	2271	2907	4399	3990	2890	4220	1778	6424	3211
MA0681.3	PHOX2B	6258	9976	15901	12298	4570	14624	18233	16990	11820	17470	7440	8554	8925	15219	14072	6245	8827	3963	37239	18897	5556	3908	5328	4055	6081	4026	5699	6555	9597	6335	4168	21005	4819	4822	6657	3440	3503	3633	5195	3049	4091	5999	5482	4237	6188	2593	9202	4433
MA0682.3	PITX1	0	0	0	0	0	0	0	0	0	0	0	0	0	0	0	0	0	0	0	0	0	0	0	0	0	0	0	0	0	0	0	0	0	0	0	0	0	0	0	0	0	0	0	0	0	0	0	0
MA0683.2	POU4F2	4334	6414	11465	9514	2964	10394	13185	12294	8862	12714	4202	4996	4981	11400	9424	5202	4859	2913	27821	14060	4745	3193	3900	3041	4543	2845	4185	4824	6330	4427	3344	15350	3878	3431	4772	2571	2653	2802	3470	2371	3132	4225	3863	3115	4414	1994	6370	3099
MA0684.3	RUNX3	2990	6023	12508	6768	2827	11088	14274	13595	9120	13695	3773	3851	3918	13579	9737	5767	4119	2925	28536	14586	4573	4384	3778	2903	4609	2896	4095	5479	6522	4778	3501	14149	4293	3481	5065	2679	2573	2922	3428	2831	3263	4516	4172	3819	4724	1905	6040	3066
MA0685.2	SP4	2315	14653	18112	9016	3723	17173	24937	21774	13453	21703	4859	6135	6374	20315	14667	10693	5927	4209	74642	24826	6516	4366	3355	2815	4524	2778	3609	5764	6451	4674	2888	13082	4064	3006	4830	2307	2115	2796	2829	2542	2726	4267	4038	3140	4628	1750	5685	2771
MA0686.2	SPDEF	1591	2010	7055	2104	960	3556	5683	4446	3304	4557	1667	1400	1736	4109	2949	3643	1458	1287	15434	5346	1912	1003	853	847	1072	656	940	1217	2193	1276	879	3378	1118	817	1297	726	648	742	799	687	770	1037	1009	870	1115	551	1494	795
MA0687.2	SPIC	3070	8235	10608	7004	2951	11124	14623	13424	10181	14068	5166	4960	5162	13853	10942	5856	5387	3536	30917	14904	5741	4556	3990	3510	5272	3006	4371	5458	6413	5093	3514	14855	4359	3387	5279	2871	2848	3166	3402	2972	3479	4487	4146	3835	5000	2402	6233	2955
MA0688.2	TBX2	3541	6293	12424	6647	2354	10951	14408	12652	7999	13308	3387	3845	3959	10935	9924	4856	3881	3958	28697	14016	4122	2883	3174	2354	3873	2424	3389	4422	6028	4328	2755	13335	3282	3008	4483	2151	2037	2267	3052	2327	2602	4117	3906	3001	3875	1553	5333	2751
MA0689.1	TBX20	2954	5466	10557	5983	2029	10067	12981	11580	7471	12090	3218	3451	3569	10637	9081	4656	3508	3529	25779	13054	4105	3388	3131	2335	3910	2398	3329	4419	5683	4030	2711	12731	3345	2843	4355	2150	1990	2256	2876	2319	2565	3785	3615	3088	3784	1540	5035	2632
MA0690.3	TBX21	3041	5382	11103	6173	2099	9854	12939	11573	6998	11928	3010	3265	3274	9904	8462	4660	3377	4117	24385	12828	3968	2819	2917	2205	3628	2308	3046	4030	5382	3861	2471	12262	3157	2795	4067	2038	1860	2158	2807	2169	2377	3667	3516	2776	3563	1497	4878	2531
MA0691.1	TFAP4	4155	10585	15994	8807	4598	23098	28577	24527	20158	27286	6857	7634	7339	27355	19432	9481	7484	6174	59639	28247	8465	7084	7573	6274	9789	5897	8162	9845	13463	10619	6858	32306	8657	7588	9821	5407	4368	5732	7537	6386	6680	9653	8702	6848	9354	4044	13007	6845
MA0692.2	TFEB	2193	3581	14204	4432	1420	6445	8694	7823	6078	7593	3493	3796	3972	7610	5759	5379	3809	1422	19606	8777	2910	1403	1869	1419	2341	1364	1975	2415	2577	2265	1412	5973	2181	1411	2479	1311	1454	1540	1393	1499	1466	2001	1804	1488	2072	1117	2473	1274
MA0693.4	Vdr	1883	3267	5998	2880	1537	7411	9639	8314	5495	9027	1909	2056	2062	6797	6029	3051	2190	1936	20983	9527	3091	1949	2113	1768	2833	1755	2246	2751	3669	2868	2007	8057	2495	1928	2979	1511	1378	1692	1906	1732	1861	2532	2385	1990	2577	1232	3456	1752
MA0694.2	ZBTB7B	2497	5750	13275	4445	2007	6824	9990	8238	6358	8706	2814	3165	3475	7900	6050	4160	3415	1745	32552	9693	3081	2243	1713	1182	2109	1201	1737	3001	2370	1902	1530	5222	1994	1154	2302	1161	991	1335	1175	1142	1281	1669	1580	1778	2113	746	2310	974
MA0695.3	ZBTB7C	2749	8337	12128	3774	2167	8628	12089	10231	8558	10901	3303	3528	3923	10040	7462	5164	3996	2426	42757	11862	4581	2323	2428	1523	2889	1751	2507	4377	3290	2760	2064	7317	2835	1718	3138	1589	1341	1877	1616	1720	1850	2418	2269	2215	3061	1039	3299	1479
MA0696.1	ZIC1	2059	5412	12880	6480	1612	9860	13881	11799	9745	12461	1597	2330	1838	13013	8384	6276	1816	1929	44386	13799	3929	2335	2770	1849	3378	1782	2969	3761	4656	3507	2104	10317	3060	2229	3670	1642	1882	2003	2128	1976	2127	3122	2961	2472	3113	1092	4206	1945
MA0697.3	Zic3	3545	8279	17037	10027	2705	18004	24258	21594	18652	23205	4302	4219	4042	22244	15718	9364	3894	5044	66260	24971	7728	5717	6112	4611	7299	4224	6893	8206	10795	8135	5055	24684	6841	5722	8013	4134	4678	4714	5549	4895	4975	7983	6997	5491	6847	3033	10429	5287
MA0698.2	ZBTB18	4312	8025	16382	8267	4805	17348	21183	19406	16286	21584	5343	6078	5883	18839	14331	9822	5733	6006	55514	22415	8084	5161	5531	4461	7045	4430	6051	7391	10833	7709	5377	24262	6476	5638	7695	4284	3690	4455	5492	4689	5138	7220	6496	5243	6851	2884	10010	5110
MA0699.2	LBX2	0	0	0	0	0	0	0	0	0	0	0	0	0	0	0	0	0	0	0	0	0	0	0	0	0	0	0	0	0	0	0	0	0	0	0	0	0	0	0	0	0	0	0	0	0	0	0	0
MA0700.3	LHX2	0	0	0	0	0	0	0	0	0	0	0	0	0	0	0	0	0	0	0	0	0	0	0	0	0	0	0	0	0	0	0	0	0	0	0	0	0	0	0	0	0	0	0	0	0	0	0	0
MA0701.3	LHX9	2585	4313	7463	6451	1932	7301	10744	8454	8106	8691	2619	3060	3162	8342	6488	2831	3080	2265	14931	9563	2725	2113	2610	2206	3147	1943	2815	3596	4303	3089	2330	9463	2631	2435	3376	1729	1827	1986	2357	1824	2120	2949	2708	2237	3063	1473	4188	2145
MA0702.3	LMX1A	0	0	0	0	0	0	0	0	0	0	0	0	0	0	0	0	0	0	0	0	0	0	0	0	0	0	0	0	0	0	0	0	0	0	0	0	0	0	0	0	0	0	0	0	0	0	0	0
MA0703.3	LMX1B	5115	6995	14551	11459	3116	12442	15548	14337	9461	15151	4968	5829	5870	12590	11619	5128	5597	2995	30102	16156	4714	3335	4368	3371	5161	3246	4849	5838	7303	5156	3849	16295	4223	3794	5507	2795	2837	3011	4071	2899	3474	4869	4461	3391	5000	2145	7516	3574
MA0704.2	Lhx4	0	0	0	0	0	0	0	0	0	0	0	0	0	0	0	0	0	0	0	0	0	0	0	0	0	0	0	0	0	0	0	0	0	0	0	0	0	0	0	0	0	0	0	0	0	0	0	0
MA0705.2	Lhx8	0	0	0	0	0	0	0	0	0	0	0	0	0	0	0	0	0	0	0	0	0	0	0	0	0	0	0	0	0	0	0	0	0	0	0	0	0	0	0	0	0	0	0	0	0	0	0	0
MA0706.2	MEOX2	2763	4491	8029	10890	2879	7582	9621	8324	6557	9037	2501	2943	2977	8134	6351	2864	3002	1805	14240	9866	2511	2405	2898	2266	3498	2145	3105	3804	4535	3434	2546	9991	3036	2361	3446	1931	1809	2204	2490	2027	2379	3053	2979	2397	3248	1510	4392	2213
MA0707.3	MNX1	0	0	0	0	0	0	0	0	0	0	0	0	0	0	0	0	0	0	0	0	0	0	0	0	0	0	0	0	0	0	0	0	0	0	0	0	0	0	0	0	0	0	0	0	0	0	0	0
MA0708.3	MSX2	0	0	0	0	0	0	0	0	0	0	0	0	0	0	0	0	0	0	0	0	0	0	0	0	0	0	0	0	0	0	0	0	0	0	0	0	0	0	0	0	0	0	0	0	0	0	0	0
MA0709.2	Msx3	0	0	0	0	0	0	0	0	0	0	0	0	0	0	0	0	0	0	0	0	0	0	0	0	0	0	0	0	0	0	0	0	0	0	0	0	0	0	0	0	0	0	0	0	0	0	0	0
MA0710.2	NOTO	2585	4313	7463	6451	1932	7301	10744	8454	8106	8691	2619	3060	3162	8342	6488	2831	3080	2265	14931	9563	2725	2113	2610	2206	3147	1943	2815	3596	4303	3089	2330	9463	2631	2435	3376	1729	1827	1986	2357	1824	2120	2949	2708	2237	3063	1473	4188	2145
MA0711.2	OTX1	0	0	0	0	0	0	0	0	0	0	0	0	0	0	0	0	0	0	0	0	0	0	0	0	0	0	0	0	0	0	0	0	0	0	0	0	0	0	0	0	0	0	0	0	0	0	0	0
MA0712.3	OTX2	1582	2057	5696	3851	1344	4899	6376	5721	3678	5961	1364	1550	1775	5070	4058	1971	1670	1239	12460	6595	1768	1167	1292	1087	1817	998	1361	1824	2368	1791	1067	5111	1306	1194	1885	829	902	896	1242	873	986	1666	1579	1227	1546	711	2277	1116
MA0713.1	PHOX2A	4188	6699	10748	8636	3320	10688	13334	12617	8590	12660	4583	5750	5585	10845	10220	4205	5491	2607	23143	13975	3682	2975	3716	2857	4477	2839	4063	4705	6563	4503	2960	14430	3420	3347	4646	2342	2459	2586	3563	2339	2854	4227	3886	2996	4207	1851	6373	3042
MA0714.2	PITX3	0	0	0	0	0	0	0	0	0	0	0	0	0	0	0	0	0	0	0	0	0	0	0	0	0	0	0	0	0	0	0	0	0	0	0	0	0	0	0	0	0	0	0	0	0	0	0	0
MA0715.1	PROP1	5485	9366	16239	11354	4237	13644	16652	16222	10884	16636	6239	7827	7371	14649	13277	5480	7485	3448	32762	18121	4917	3793	5076	3711	5837	3792	5587	6281	8767	5970	3771	19350	4427	4536	6205	3038	3168	3395	4955	2947	3685	5705	5201	3921	5568	2490	8768	4172
MA0716.2	PRRX1	0	0	0	0	0	0	0	0	0	0	0	0	0	0	0	0	0	0	0	0	0	0	0	0	0	0	0	0	0	0	0	0	0	0	0	0	0	0	0	0	0	0	0	0	0	0	0	0
MA0717.2	RAX2	0	0	0	0	0	0	0	0	0	0	0	0	0	0	0	0	0	0	0	0	0	0	0	0	0	0	0	0	0	0	0	0	0	0	0	0	0	0	0	0	0	0	0	0	0	0	0	0
MA0718.2	RAX	0	0	0	0	0	0	0	0	0	0	0	0	0	0	0	0	0	0	0	0	0	0	0	0	0	0	0	0	0	0	0	0	0	0	0	0	0	0	0	0	0	0	0	0	0	0	0	0
MA0719.2	RHOXF1	0	0	0	0	0	0	0	0	0	0	0	0	0	0	0	0	0	0	0	0	0	0	0	0	0	0	0	0	0	0	0	0	0	0	0	0	0	0	0	0	0	0	0	0	0	0	0	0
MA0720.2	Shox2	0	0	0	0	0	0	0	0	0	0	0	0	0	0	0	0	0	0	0	0	0	0	0	0	0	0	0	0	0	0	0	0	0	0	0	0	0	0	0	0	0	0	0	0	0	0	0	0
MA0721.2	UNCX	0	0	0	0	0	0	0	0	0	0	0	0	0	0	0	0	0	0	0	0	0	0	0	0	0	0	0	0	0	0	0	0	0	0	0	0	0	0	0	0	0	0	0	0	0	0	0	0
MA0722.2	VAX1	2585	4313	7463	6451	1932	7301	10744	8454	8106	8691	2619	3060	3162	8342	6488	2831	3080	2265	14931	9563	2725	2113	2610	2206	3147	1943	2815	3596	4303	3089	2330	9463	2631	2435	3376	1729	1827	1986	2357	1824	2120	2949	2708	2237	3063	1473	4188	2145
MA0723.3	VAX2	0	0	0	0	0	0	0	0	0	0	0	0	0	0	0	0	0	0	0	0	0	0	0	0	0	0	0	0	0	0	0	0	0	0	0	0	0	0	0	0	0	0	0	0	0	0	0	0
MA0724.1	VENTX	1384	2556	5512	3792	1067	4326	5857	5125	3581	5306	1484	1733	1766	5232	3984	1927	1758	1194	10970	5806	1759	1123	1269	1037	1687	944	1349	1725	2003	1518	1074	4426	1279	1033	1600	805	838	966	1026	880	1087	1320	1264	1179	1588	757	1871	939
MA0725.2	VSX1	2585	4313	7463	6451	1932	7301	10744	8454	8106	8691	2619	3060	3162	8342	6488	2831	3080	2265	14931	9563	2725	2113	2610	2206	3147	1943	2815	3596	4303	3089	2330	9463	2631	2435	3376	1729	1827	1986	2357	1824	2120	2949	2708	2237	3063	1473	4188	2145
MA0726.2	VSX2	2585	4313	7463	6451	1932	7301	10744	8454	8106	8691	2619	3060	3162	8342	6488	2831	3080	2265	14931	9563	2725	2113	2610	2206	3147	1943	2815	3596	4303	3089	2330	9463	2631	2435	3376	1729	1827	1986	2357	1824	2120	2949	2708	2237	3063	1473	4188	2145
MA0727.2	NR3C2	1812	4008	7745	4676	1609	6439	8643	7589	5835	8530	2095	2081	2159	8010	5863	2997	2196	2069	18683	8522	3017	2386	2300	1803	2850	1677	2382	3097	4095	3113	2004	9465	2671	2152	3253	1833	1589	1842	2036	1863	2063	2903	2492	2299	2826	1196	3955	1903
MA0728.1	Nr2F6	2077	4896	8543	4030	2239	7713	10741	9189	7096	9377	2140	2860	2672	8298	6451	4429	2582	1988	24420	10112	3249	1850	2073	1695	2539	1620	2149	2900	3468	2475	1701	8030	2166	1810	2805	1405	1377	1429	1755	1489	1638	2381	2255	1810	2468	1117	3299	1599
MA0729.1	RARA	1606	4355	7632	3749	1460	5971	8206	6946	5048	7700	1803	2248	2296	6161	5258	2805	2048	1587	18957	7855	2528	1711	1713	1411	2119	1304	1786	2403	2895	2123	1484	7103	1969	1498	2355	1286	1119	1302	1502	1222	1456	2272	1868	1587	2167	969	2667	1380
MA0730.1	RARA	1683	3286	9229	4927	1459	7252	9802	8956	6667	9379	1735	2025	1923	8559	7255	3282	1921	1733	25348	10086	2990	2053	1937	1603	2548	1409	2062	2952	3735	2618	1761	8843	2304	1888	2922	1437	1417	1606	1795	1504	1640	2457	2375	1921	2572	1106	3523	1674
MA0731.1	BCL6B	1415	3519	6487	4177	1817	6117	7907	7156	5386	8127	2180	2370	2568	7097	5861	3599	2529	1879	17033	8079	3450	2075	2285	1939	2954	1652	2495	3107	4035	2981	1985	9755	2475	2056	3091	1577	1685	1825	2025	1659	1921	2735	2607	2086	2750	1293	3859	1846
MA0732.2	EGR3	1729	5599	10745	3552	1151	5762	8929	7688	5147	7351	1910	2368	2190	7583	4805	4315	2353	1385	34567	8969	2982	1052	1274	1346	2280	923	1506	2172	2669	1861	1022	4454	1506	896	1637	832	1233	1003	998	968	958	1412	1415	1138	1920	707	2108	877
MA0733.2	EGR4	1989	6263	11898	4078	1360	6906	10404	9022	6623	8861	2554	2844	2936	9019	6081	4842	3029	1822	43388	10745	3675	1350	1599	1539	2590	1135	1792	2557	3110	2229	1208	5646	1807	1193	2061	947	1371	1226	1255	1198	1188	1744	1699	1431	2231	916	2582	1121
MA0734.4	Gli2	2710	7472	13210	5509	2551	10928	14684	12789	10413	14326	3660	4027	4162	13721	9635	5818	4077	3002	52690	14420	5482	2566	2618	1812	3294	1967	2800	4031	4560	3626	2189	9812	3025	2352	3749	1827	1730	1961	2219	1935	2130	3182	2929	2486	3289	1193	4233	2156
MA0735.2	GLIS1	893	2142	5556	2170	669	3379	4993	4172	3221	4074	900	882	941	4097	2550	2069	832	666	14493	4604	1443	715	753	602	1035	469	742	1226	1159	942	630	2483	840	535	979	448	578	536	530	584	582	844	755	698	943	348	987	457
MA0736.1	GLIS2	1523	5584	12593	5936	1283	8180	11184	10374	8600	10457	1751	2935	2257	10249	6482	5449	2135	1496	37530	11780	2840	2341	1806	1245	2273	1200	1894	2833	2784	2307	1390	6083	1879	1375	2627	1091	1126	1157	1290	1193	1170	2617	1838	1892	2210	731	2486	1188
MA0737.1	GLIS3	1382	4458	11141	5370	1393	7388	10018	9179	7249	9327	1725	2053	1910	8699	5908	4018	1833	1571	29758	10645	2833	2033	1649	1204	2104	1173	1669	2601	2730	2239	1349	6028	1728	1383	2537	1175	1085	1057	1281	1142	1227	3434	1721	1810	2018	748	2412	1159
MA0738.2	HIC2	0	0	0	0	0	0	0	0	0	0	0	0	0	0	0	0	0	0	0	0	0	0	0	0	0	0	0	0	0	0	0	0	0	0	0	0	0	0	0	0	0	0	0	0	0	0	0	0
MA0739.2	Hic1	3802	7542	12619	8250	2621	12359	15857	14580	12196	15868	4420	4659	4529	14465	10380	6300	4612	3802	42447	16600	6654	3873	3772	2745	4772	2676	4087	5132	6741	4987	3074	14872	4297	3620	4982	2496	2465	2934	3240	3050	3163	7067	4113	3659	4218	1753	6726	3396
MA0740.2	KLF14	2524	8980	14518	8576	3037	17341	25497	21751	13923	22333	5824	7342	7371	21074	14617	9878	7014	3907	84659	25077	6651	3285	2899	2294	4266	2447	3177	4553	5962	4535	2373	12739	3339	3029	4473	1877	1680	2201	2880	2212	2140	4053	3822	2829	4076	1441	5421	2691
MA0741.1	KLF16	2638	14060	17654	8951	2650	14153	21545	18340	12425	17933	5319	6313	6725	17831	12795	9542	6544	3405	73688	21300	5895	2564	2245	1849	3166	2056	2552	3512	4514	3409	1921	9597	2507	2191	3664	1459	1240	1781	2085	1545	1601	3198	2980	2245	3383	1143	4025	1899
MA0742.2	KLF12	1483	5758	11598	5852	2227	11112	16381	13618	8093	14243	3155	4080	4235	13586	9332	5846	4012	2458	51730	15783	4107	2076	1808	1511	2610	1540	1976	2731	3838	2706	1392	7318	2138	1615	2821	1212	1211	1382	1557	1407	1364	2386	2313	1714	2646	944	3141	1469
MA0743.3	SCRT1	3166	6576	11532	6728	2583	11156	14513	12854	10803	13997	3796	3949	3989	12943	9770	5795	3802	3420	38272	14617	5147	3532	3297	2626	4200	2709	3683	4714	5884	4406	2852	13132	3766	3104	4618	2400	2120	2589	2903	2676	2790	4024	3687	3224	4343	1773	5446	2772
MA0744.3	SCRT2	2826	6688	11304	6860	2441	11328	14411	13048	10533	14206	3438	3685	3603	13339	9706	5853	3491	3275	38539	14831	5090	3628	3334	2750	4329	2691	3766	4759	5758	4422	2808	12796	3744	3050	4643	2400	2242	2547	2835	2629	2804	4035	3614	3272	4433	1837	5287	2773
MA0745.3	SNAI2	3974	8614	19288	8127	2704	16172	20757	18972	15982	20229	3820	4228	4268	18514	13510	7838	4459	4712	57081	21323	7379	4061	4772	3544	5958	3488	4943	6188	9609	6853	4019	20871	5205	4969	6415	3251	3050	3620	4558	3610	3813	6472	5557	3775	5823	2291	8577	4320
MA0746.3	SP3	2008	5035	10421	6142	1835	9806	14415	12210	7743	12380	4052	4977	5360	12216	8683	5517	5068	2351	48903	14292	3854	1586	1390	1114	2084	1258	1568	2160	3222	2402	1237	6536	1870	1499	2296	1102	802	1271	1433	1176	1143	2115	1965	1261	2115	702	2859	1314
MA0747.2	SP8	2536	14574	17939	8839	2761	13586	19839	17658	12421	17175	5414	6562	6914	16373	12304	9922	6585	3439	68789	20451	5746	4217	2545	2033	3387	2101	2828	4342	4678	3595	2129	10026	2865	2248	3806	1632	1399	1963	2192	1757	1959	3307	3018	2586	3544	1227	4134	1998
MA0748.3	YY2	936	1702	7270	2934	676	2280	3629	2978	1564	2923	858	896	1262	4469	2089	1831	992	854	13279	3601	1405	464	409	381	572	249	444	507	697	481	454	929	554	237	400	270	352	376	220	375	347	336	342	389	519	222	560	231
MA0749.2	ZBED1	484	645	2775	2565	630	1011	1363	1148	669	1146	425	336	373	956	1022	553	335	270	3053	1362	421	263	299	244	370	220	304	403	484	331	292	926	303	244	338	204	215	223	178	207	237	241	311	285	351	205	426	160
MA0750.4	ZBTB7A	1967	6139	16509	7019	2063	9812	13514	11761	8955	12926	2272	3473	2922	10602	8173	5346	2872	1810	34677	13224	3705	1699	1910	1397	2431	1253	1979	2956	3252	2612	1533	6892	2015	1826	2770	1103	1327	1278	1619	1208	1433	2506	1981	1652	2361	909	3340	1493
MA0751.2	ZIC4	1934	4923	12107	5993	1480	9244	13488	11310	9151	11676	1549	2220	1789	12566	7861	6167	1755	1703	43560	13105	3617	2082	2455	1638	3012	1568	2641	3288	4105	3103	1830	8847	2736	1941	3274	1436	1742	1752	1857	1734	1844	2713	2605	2172	2791	948	3674	1645
MA0752.2	ZNF410	1983	3423	7950	5988	1862	6438	8345	7635	5233	8276	2076	2365	2380	7149	5869	2976	2357	1944	16955	8644	2895	1958	1693	1375	2182	1361	1740	2437	3010	2251	1686	7603	1866	1677	2289	1171	1131	1256	1534	1213	1526	1995	1791	1677	2184	883	2907	1384
MA0753.3	ZNF740	2721	33169	30236	14604	4138	20607	32424	28674	20491	26290	7075	8441	8930	26401	17543	20126	8163	5595	108867	33589	8582	4341	3508	3499	5463	3117	3890	6604	6039	4792	2792	13009	3512	2964	5585	1949	1739	2319	2861	2316	2397	4364	3863	3513	5162	1809	5208	2466
MA0754.3	CUX1	1993	2364	6386	3749	1096	3976	5254	4561	2954	4899	1757	1868	2104	4463	3341	1898	2076	1150	11541	5264	1551	985	1173	939	1374	889	1235	1475	1852	1311	990	4162	1218	941	1498	817	896	821	1037	791	916	1156	1188	1021	1376	661	1727	893
MA0755.2	CUX2	1317	1742	5099	2091	806	2613	3620	2953	1803	3477	1283	1288	1387	3116	2403	1210	1462	713	8090	3432	930	635	785	599	910	613	877	928	1191	914	648	2655	812	585	953	511	604	542	624	543	618	751	782	674	888	460	1153	571
MA0756.3	ONECUT2	738	1132	4151	1712	1069	2305	2880	2283	1293	2981	831	892	929	2126	1831	843	997	532	6348	2747	763	485	541	435	688	427	592	747	822	686	487	1925	582	431	746	401	405	433	446	430	430	539	542	520	682	327	804	387
MA0757.2	ONECUT3	4235	7216	15921	8456	2887	9811	12161	11287	6796	11691	4465	4963	5352	9093	8216	4607	5202	2793	32136	12899	3928	2431	3598	2424	3386	2131	3884	3789	5027	3432	2657	11310	3053	2538	3723	2093	2136	2122	2730	1894	2487	3228	3089	2414	3352	1523	4823	2445
MA0758.1	E2F7	940	3459	7556	6467	1609	5335	7210	6612	4110	6903	2274	2643	2731	6429	5611	3938	2620	1685	19003	7748	2494	1308	1470	1277	2093	1208	1572	2212	3163	2059	1256	6642	1788	1429	2321	1044	1158	1092	1416	1032	1191	2035	1977	1415	1828	878	2830	1299
MA0759.3	ELK3	1379	1358	5374	1708	737	2353	4180	3114	1547	2861	1279	1266	1695	3130	2153	3324	1319	811	13454	3831	1297	434	284	418	479	220	329	500	1165	495	357	935	476	208	482	287	253	339	225	328	287	339	359	379	487	320	478	193
MA0760.2	ERF	1861	2971	7380	3490	1152	5122	6879	6065	4382	6245	1846	1986	2394	6508	4474	3688	2101	1786	17413	6824	2225	1230	1086	1184	1417	804	1200	1531	2624	1663	1095	4297	1484	1081	1626	911	925	1079	997	1021	974	1365	1354	1171	1396	818	1964	915
MA0761.3	ETV1	4436	10100	20907	10210	4389	19838	26042	23424	18908	25244	6551	6767	7051	23181	17323	11065	7144	6458	59161	26553	10409	5942	5970	4932	6993	4382	6218	8147	11312	8308	5416	24413	7088	5754	8501	4331	4592	4724	5700	4836	5213	7655	7029	5593	7144	3549	10358	5166
MA0762.2	ETV2	1640	2894	8084	3582	1448	5228	7160	5953	3806	6438	2305	2223	2672	6157	4499	2948	2448	1786	17722	6798	2337	1328	1230	1294	1525	943	1324	1735	2483	1800	1183	4767	1656	1181	1769	998	1009	1133	1121	1042	1054	1487	1477	1309	1563	949	2070	1016
MA0763.2	ETV3	1756	2302	6330	2410	1047	3849	5540	4708	3177	4700	1570	1786	2182	4701	3395	3996	1813	1316	16290	5533	1725	916	815	822	1173	634	882	1187	2094	1187	842	2791	1096	736	1210	654	672	775	717	740	747	880	962	856	1119	582	1345	590
MA0764.4	ETV4	1529	1824	6150	2164	971	3123	5193	4051	2162	3785	1487	1499	1962	4710	2898	3545	1561	1014	14600	4715	1471	574	424	570	637	325	483	715	1428	710	493	1494	680	361	717	393	417	487	349	466	450	545	520	550	661	422	741	306
MA0765.4	ETV5	1389	1299	5330	1534	769	2202	3879	2943	1549	2689	1263	1353	1934	3893	2219	3245	1413	788	13343	3564	1153	417	254	385	467	214	314	491	1141	489	339	903	467	205	476	281	251	326	217	318	297	344	315	381	460	277	471	175
MA0766.3	GATA5	1509	2965	7422	5082	1515	5731	6983	6192	4666	7125	2388	2397	2725	5959	4665	2572	2680	1868	16070	7176	2384	1979	2014	1585	2605	1443	2032	2656	3211	2420	1785	6804	2181	1691	2439	1370	1411	1618	1600	1442	1661	2198	1994	1846	2439	1171	2956	1496
MA0767.2	GCM2	805	1464	8235	3534	750	2878	4544	3782	2620	4099	866	814	728	3787	2687	1883	856	595	15584	4506	1517	806	677	546	972	493	714	1004	926	809	599	1947	802	413	732	435	510	526	433	560	502	593	576	667	859	363	867	356
MA0768.3	Lef1	3541	8332	10397	6675	3697	12429	15472	14576	11019	15689	4495	4888	5064	14156	11514	6040	5069	4340	28901	16419	5965	3943	4112	3581	5462	3313	4665	5795	6999	5389	3807	15670	4468	3842	5604	2909	3001	3242	3766	3093	3513	4921	4526	3991	5237	2462	6642	3430
MA0769.3	TCF7	2841	4747	7758	5555	2840	9017	10852	10401	8119	11083	3622	3825	4051	9756	8464	4294	3983	3217	21921	11808	3915	2835	3053	2707	3962	2411	3491	4208	5117	3888	2915	11292	3300	2799	3969	2189	2208	2432	2698	2309	2690	3600	3354	2831	3853	1825	4838	2533
MA0770.1	HSF2	1826	3497	9689	6057	3383	7273	8858	7923	5283	8850	2875	3225	3389	8023	6340	3719	3349	3015	20711	9023	3709	2078	2337	1938	2930	1801	2540	3143	4469	3081	2000	10199	2470	2234	3426	1705	1688	1893	2164	1712	1980	2970	2864	2091	2935	1331	4176	2096
MA0771.1	HSF4	1601	3046	8292	4832	1576	5964	7998	6573	4434	7300	2273	2299	2627	6560	5232	3375	2645	2488	16949	7687	3085	1769	1819	1483	2470	1527	2032	2520	3580	2667	1608	8246	2072	1914	2744	1408	1381	1540	1797	1471	1625	2478	2338	1711	2472	1115	3432	1712
MA0772.2	IRF7	4727	10680	15504	9256	3182	11596	14703	12858	10526	13806	4818	5118	5658	12761	10266	5967	5571	4037	33502	14816	5349	4296	4687	3788	5634	3472	5000	6216	7894	5574	3950	18567	4978	3984	5920	3308	3147	3554	4015	3139	3963	5324	4957	4200	5476	2597	7527	3710
MA0773.1	MEF2D	4288	9006	16641	12387	3993	11583	15076	13774	9935	13833	4804	5551	5586	12083	11274	5458	5598	3263	29569	15580	4651	3453	4461	3427	4943	3069	4793	5433	6644	4702	3477	15090	4090	3551	4969	2692	3104	2906	3568	2624	3242	4424	4019	3531	4769	2285	6564	3240
MA0774.1	MEIS2	3570	7926	14519	6921	2668	13674	16566	15041	12590	16755	4145	4604	4449	14257	10968	6405	4340	4199	41618	17117	5841	4749	4773	3659	6026	3747	5127	6579	8442	6422	4322	19300	5412	4642	6483	3377	3067	3761	4604	3728	4035	5902	5612	4394	5877	2427	8122	4160
MA0775.2	MEIS3	2533	5266	7913	4021	2648	7765	9914	9074	6716	9442	3041	3233	3590	8961	6834	4602	3509	2411	19637	10107	3506	2500	2555	2236	3404	2217	2775	3545	4194	3174	2219	9454	2807	2288	3487	1781	1848	1970	2287	1884	2173	3014	2800	2390	3404	1498	4031	1999
MA0776.1	MYBL1	789	1462	5127	1687	474	2220	3387	2587	1519	2710	682	776	965	2606	1863	1148	984	443	6322	3100	821	665	649	559	1080	597	693	1024	815	667	598	1888	705	385	759	452	425	483	414	490	537	541	502	648	1064	448	703	366
MA0777.1	MYBL2	890	1135	5360	1676	842	2409	2828	2488	1519	2682	819	658	717	2704	1944	1239	726	531	6106	2864	779	560	545	581	857	479	648	911	832	686	561	1998	667	462	799	378	445	505	407	468	515	575	546	635	834	395	766	397
MA0778.2	NFKB2	1920	5466	14714	6843	1722	12768	18861	15609	10671	16480	2311	4078	2753	13203	9208	5799	2845	2136	55394	17283	4417	2273	2470	1795	3592	1931	2594	4124	5626	4063	1769	11785	2563	2740	4260	1529	1509	1675	2709	1606	1613	3959	3401	2550	3396	1081	5271	2592
MA0779.2	PAX1	964	1586	4467	1857	736	3293	4570	3872	2875	4153	919	1098	1018	3478	2704	1424	1030	823	11219	4686	1711	972	968	704	1303	809	1080	1514	1442	1246	889	3488	1156	752	1220	689	713	831	748	699	801	1026	940	981	1359	512	1399	665
MA0780.1	PAX3	3597	5036	10073	5701	2284	8666	10167	9508	6622	10073	3773	4167	4477	8564	8263	3818	4434	2046	21535	10947	3233	1991	2707	2051	3258	2004	2956	3402	5362	3494	2375	11206	2576	2675	3531	1896	1846	1953	2767	1731	2119	3375	3128	2126	3196	1353	4977	2473
MA0781.2	PAX9	975	1446	4888	1939	765	3233	4625	3805	2907	4123	932	1010	1021	3370	2585	1393	1076	810	11694	4645	1662	872	905	691	1279	782	1010	1410	1361	1239	849	3342	1078	700	1158	672	632	777	695	677	769	975	931	961	1321	520	1313	637
MA0782.3	PKNOX1	4110	7276	12229	7555	2305	13017	16131	14472	10373	15477	3935	4080	3879	13671	10812	5689	3808	3304	38558	16557	5090	4243	3748	3216	4829	3079	4080	5313	7218	5172	3532	16163	4336	3699	5605	2858	2582	3120	3690	2947	3421	5082	4635	3790	4962	2085	6613	3390
MA0783.1	PKNOX2	3566	7435	13618	7273	2767	13249	16724	14690	12549	16445	3694	4126	3790	17058	10997	6238	3854	3793	34625	16903	5193	3834	4090	3362	5281	3319	4381	5297	7988	5522	3675	17412	4839	3898	5345	3015	2595	3357	3913	3383	3654	5087	4663	3760	5354	2158	6946	3634
MA0784.3	POU1F1	3861	6506	11720	9517	3130	10535	13393	12284	9458	12824	4355	4618	4709	17237	9624	4881	4506	3134	26367	14038	4846	3162	3675	3202	4518	2810	3922	4623	5950	4355	3171	14080	3750	3128	4613	2487	2620	2597	3176	2456	3011	3920	3820	3141	4543	1963	5945	2802
MA0785.2	POU2F1	4052	7222	13074	9799	3634	11708	14320	13524	10077	14196	4845	5090	5118	18446	10209	5816	5081	3937	28418	15046	6011	3617	4064	3539	5138	3120	4369	5053	6399	4767	3396	14460	4153	3352	4977	2773	2866	2979	3476	2742	3381	4254	4188	3577	4898	2267	6391	2980
MA0786.2	POU3F1	5000	8042	14821	11782	4181	13088	16448	15120	11309	16103	5681	6174	6042	20051	11742	6269	6013	4206	31388	17150	6319	4028	4818	4098	5874	3710	5051	5961	7670	5668	3972	17302	4762	4003	6001	3119	3366	3431	4060	3135	3926	5023	4904	4171	5779	2599	7606	3619
MA0787.1	POU3F2	4754	7711	13510	11018	3787	12367	15503	14469	10883	15199	5315	5873	5799	19875	11458	5870	5644	3846	32113	16387	5981	3768	4540	3735	5388	3389	4748	5629	7291	5294	3695	16545	4286	3771	5461	2911	3038	3174	3896	2928	3620	4765	4586	3819	5289	2340	7226	3441
MA0788.1	POU3F3	5174	7967	15032	12096	4081	12588	15865	14542	11174	15176	5855	6379	6218	18816	11643	6043	6207	3887	32916	16550	6110	3881	4683	3932	5664	3522	4988	5853	7835	5606	3844	18015	4493	4050	5976	3057	3237	3309	4190	3011	3706	5081	4776	3910	5610	2502	7789	3642
MA0789.1	POU3F4	4259	7764	13550	10540	4127	12551	15464	14326	10930	15371	5030	5386	5261	19324	10835	6222	5256	4180	30085	16153	6513	3879	4374	3811	5541	3369	4619	5336	6780	5084	3667	15294	4451	3552	5298	2982	3060	3203	3640	3004	3612	4440	4437	3856	5227	2438	6720	3191
MA0790.2	POU4F1	6254	8860	19909	13170	4603	13681	17923	16520	11864	16551	6420	7492	7457	15109	12965	7380	7431	4282	42001	18654	6535	4315	5362	4258	6224	3937	5949	6442	9117	6144	4555	20740	5232	4755	6644	3587	3691	3789	4974	3306	4180	5878	5295	4245	6129	2721	9059	4294
MA0791.2	POU4F3	6397	8770	19048	12883	4480	13621	17722	16450	11589	16480	6456	7435	7360	15033	12940	7090	7373	4253	42180	18581	6390	4283	5316	4223	6135	3954	5846	6462	9113	6164	4550	20709	5192	4794	6638	3557	3652	3757	4994	3278	4240	5933	5324	4175	6115	2734	9116	4298
MA0792.1	POU5F1B	4334	7518	13513	10261	3768	12263	15033	13877	10641	14832	5347	5814	5762	19670	10816	6220	5641	4207	30043	15801	6453	3837	4337	3780	5515	3348	4650	5431	6893	5129	3670	15677	4460	3561	5343	2949	3103	3195	3707	2943	3621	4591	4480	3859	5252	2459	6853	3222
MA0793.2	POU6F2	2367	4545	7825	5908	1634	7417	9789	8469	7293	8945	2213	2850	2584	8833	6754	3110	2650	2030	15157	9800	2773	2322	2593	2198	3214	1834	2758	3431	4295	3126	2423	9569	2811	2340	3216	1825	1842	2060	2278	1956	2164	2897	2707	2350	3072	1468	4033	2058
MA0794.1	PROX1	1201	1909	4464	1924	1025	3617	4635	4189	3167	4273	1460	1498	1619	4673	5055	2537	1591	1159	9947	4973	1755	1243	1138	1123	1701	992	1370	1744	1814	1522	1101	4237	1393	964	1566	864	898	998	977	933	1039	1263	1252	1198	1538	804	1759	833
MA0795.1	SMAD3	1069	1960	6048	2402	1341	6332	8521	7388	6119	8027	1396	1539	1583	21617	4950	2210	1631	1732	15067	8506	2212	1243	1453	1346	1881	1159	1509	1905	2111	1646	1083	4749	1412	1196	1635	858	1036	982	1153	992	1029	1462	1355	1241	1894	855	2078	1013
MA0796.1	TGIF1	3509	7048	13578	6528	2563	11573	14217	13120	10431	14137	3295	3739	3670	15215	9576	5591	3546	3367	30614	14672	4539	3604	3910	3101	4859	3081	4029	5136	7416	5052	3530	16019	4488	3629	5031	2920	2423	3116	3656	3178	3539	4615	4420	3587	5076	2070	6451	3338
MA0797.1	TGIF2	3483	7242	12568	6308	2647	11741	14607	13257	10762	14578	3365	3753	3751	15247	9739	5816	3624	3373	30917	15105	4635	3442	3840	3008	4796	3032	4008	4984	7335	5003	3395	15776	4487	3573	4927	2829	2329	3127	3616	3082	3500	4570	4336	3481	4996	2063	6466	3356
MA0798.3	RFX3	1129	2912	4655	4103	1319	4716	6142	5535	4316	6486	1407	1639	1731	5281	4323	2400	1705	2264	17626	6392	2216	1300	1331	1087	1804	988	1431	1915	2284	1706	1309	5236	1658	1101	1931	1015	925	1170	1173	1126	1191	1526	1465	1261	1770	766	2163	1022
MA0799.3	RFX4	1348	3878	5995	6220	1679	6949	8874	7721	6025	8356	2732	4152	3280	7421	6032	4244	3462	2033	24059	9038	3517	2433	2058	1796	2882	1510	2327	3046	3135	2683	1943	7273	2550	1636	2597	1718	1565	1900	1655	1828	1849	2225	2116	2121	2524	1270	2991	1434
MA0800.2	EOMES	2968	4650	9806	6052	2058	9226	12420	10902	6791	11117	2988	3335	3521	9386	8314	4687	3484	4310	22984	12065	3827	2481	2728	2083	3470	2161	2953	3798	5107	3753	2411	11548	3097	2615	3837	1985	1758	1989	2620	2070	2326	3394	3257	2603	3397	1376	4500	2366
MA0801.1	MGA	2860	4166	9986	4834	1829	8636	11477	10003	6204	10495	1947	2457	2260	8523	7916	3627	2253	2882	23771	11431	3240	2234	2463	1742	3158	1899	2604	3671	4572	3350	2156	10348	2647	2373	3588	1759	1530	1783	2358	1876	1968	3124	3063	2262	3038	1197	4097	2177
MA0802.2	TBR1	3016	5419	10789	6250	2105	10082	13455	11736	7494	12236	3172	3545	3656	10226	9238	4624	3665	4298	24043	13233	3935	2687	3022	2276	3740	2337	3227	4119	5509	4127	2660	12462	3190	2814	4217	2081	1941	2172	2849	2242	2494	3755	3517	2852	3608	1516	4917	2577
MA0803.1	TBX15	2868	4495	10569	5458	1989	9961	12962	11734	7495	12354	2494	3074	2889	9837	8752	4451	2866	3245	27269	12981	3808	2553	2697	2005	3468	2049	2888	4008	5453	3899	2386	11894	2868	2796	4243	1818	1728	1978	2794	2036	2118	3868	3546	2550	3334	1381	4948	2521
MA0804.2	TBX19	1671	2721	7323	4159	1111	5068	7001	5794	4187	6223	1504	1499	1650	5075	4212	2372	1689	1773	12261	6517	2099	1467	1742	1249	2076	1357	1808	2303	2891	2041	1595	7137	1933	1542	2105	1195	1044	1290	1462	1275	1427	1875	1678	1595	2163	781	2886	1399
MA0805.1	TBX1	3041	4793	10575	5961	2075	9991	13107	11501	7327	12365	2850	3342	3401	9578	8731	4653	3417	3677	23638	12987	3553	2604	2786	2088	3405	2121	2975	3873	5571	3806	2436	11882	2907	2741	4037	1948	1738	2011	2762	2047	2250	3674	3511	2638	3379	1433	4789	2491
MA0806.1	TBX4	3041	4793	10575	5961	2075	9991	13107	11501	7327	12365	2850	3342	3401	9578	8731	4653	3417	3677	23638	12987	3553	2604	2786	2088	3405	2121	2975	3873	5571	3806	2436	11882	2907	2741	4037	1948	1738	2011	2762	2047	2250	3674	3511	2638	3379	1433	4789	2491
MA0807.1	TBX5	3341	5419	13643	6584	2252	11882	15610	13844	9262	14795	2958	3274	3202	12492	10259	5405	3334	3736	31769	15807	4570	2866	3191	2263	3955	2431	3419	4505	6598	4619	2811	14069	3373	3250	4690	2172	1908	2308	3261	2262	2512	4488	4128	2931	3870	1589	5722	2986
MA0808.1	TEAD3	2532	5198	10345	6351	2526	9282	11868	10550	6601	11555	3516	3415	3599	10395	8432	5870	3771	3701	27807	12603	6402	2945	2461	2061	3268	1988	2770	3463	5362	4008	2720	11716	3377	2909	4125	2262	1984	2243	2829	2189	2608	4023	3429	2626	3138	1221	5239	2777
MA0809.3	TEAD4	3085	7303	13223	8849	3335	12636	15985	14362	8956	15538	4559	4872	5066	13902	11939	7067	5271	4552	35587	16872	7356	3540	3378	2960	4403	2759	3735	4894	7876	5609	3452	17011	4236	4224	5805	2808	2619	2861	4147	2706	3308	5733	5015	3557	4305	1848	7613	3923
MA0810.2	TFAP2A	1733	6821	13942	8133	2150	13220	19374	15881	13652	16969	2413	3704	2815	18574	11996	6093	2633	3041	60291	18317	6662	2941	3627	2998	4643	2496	4059	5276	6891	4706	2499	13435	4069	3141	4870	2274	2930	2633	2998	2713	2482	4684	4061	3009	4363	1630	5951	2767
MA0811.2	TFAP2B	1650	7201	13812	8282	2249	13956	20163	16882	14850	17635	2551	4068	3097	19109	12771	6343	2970	3341	59808	19396	6850	2986	3585	3020	4526	2530	4015	5021	6846	4981	2649	14160	4186	3357	5049	2395	2907	2685	3077	2748	2638	4913	4306	3043	4175	1683	6237	2960
MA0812.2	TFAP2B	1418	6448	14065	7201	1853	14450	18761	16478	11953	17847	2615	2967	2583	18221	11101	7197	2744	2601	50372	19063	5461	2763	3137	2907	4318	2167	3421	4108	5782	4431	2309	11931	3572	2858	4027	1958	2856	2370	2830	2340	2285	4102	3730	2995	3714	1571	5563	2516
MA0813.1	TFAP2B	1488	7011	11300	7672	2397	12058	16750	14507	12690	15879	2179	3051	2720	18754	10034	5825	2795	2639	52374	16845	5130	2748	3102	2419	3786	1979	3323	4396	6197	3935	2118	11917	3309	2778	4241	1874	2527	2053	2417	2211	2010	4156	3735	2504	3588	1512	5023	2487
MA0814.3	TFAP2C	2165	7438	15118	6532	2307	15412	20381	17757	14452	19681	3203	4084	3440	19599	12616	7144	3735	3031	57936	20321	6615	3701	3954	3320	5186	2862	4240	5446	7499	5795	2927	15811	4303	3940	5630	2483	3237	2896	3771	2876	2892	5553	4949	3720	4828	2046	7221	3535
MA0815.1	TFAP2C	1494	7477	10858	7572	2576	11996	16696	14498	12506	15710	2066	3022	2596	18711	10089	5443	2737	2550	53357	16903	5015	2709	3149	2400	3806	1910	3379	4424	6296	3938	2090	11686	3304	2719	4216	1840	2595	2025	2402	2227	2013	4033	3688	2443	3540	1487	5016	2372
MA0816.1	Ascl2	5196	11659	23194	12734	4998	29313	36430	32521	28667	36071	6745	8541	7348	35297	24921	13829	7670	8820	94937	37292	12837	9057	9798	7600	12189	7123	10489	12149	18043	13666	8697	42112	11560	9701	12520	6933	6689	7551	9498	8271	8422	13026	11197	8549	11525	4895	17068	8770
MA0817.2	BHLHE23	2033	3608	8646	5273	1785	6309	8162	7655	6003	8066	2144	2200	2553	6909	5571	3759	2475	1987	17037	8853	2994	2032	2236	1918	2692	1630	2321	2638	2854	2292	1802	6722	2237	1574	2595	1363	1487	1541	1630	1605	1664	1937	1989	2096	2570	1295	2826	1321
MA0818.2	BHLHE22	1905	3299	9017	5301	1797	6026	7697	7329	5580	7409	2049	2106	2493	6409	5542	3439	2370	1970	16603	8374	2848	1872	2080	1766	2423	1552	2071	2523	2637	2139	1704	6332	2069	1458	2398	1273	1388	1465	1545	1495	1584	1805	1861	1946	2349	1201	2665	1259
MA0819.3	CLOCK	1543	2985	12045	2978	629	4516	6020	5277	4766	4998	1103	1088	1262	6083	3825	2455	1206	1064	18677	5734	2050	1215	1915	1229	2172	1202	2018	2788	2448	2253	1426	5886	2357	1329	2480	1311	1610	1460	1285	1597	1587	1787	1854	1475	2058	1009	2292	1093
MA0820.2	FIGLA	0	0	0	0	0	0	0	0	0	0	0	0	0	0	0	0	0	0	0	0	0	0	0	0	0	0	0	0	0	0	0	0	0	0	0	0	0	0	0	0	0	0	0	0	0	0	0	0
MA0821.2	HES5	1296	1846	8601	2478	513	4001	5708	5226	4843	5091	1110	924	1183	6173	3557	1636	1038	911	17975	5969	2127	914	1615	1373	1933	972	1761	2243	1900	1753	1077	4717	1904	957	1901	1071	1710	1234	917	1242	1226	1397	1342	1100	1754	946	1884	800
MA0822.1	HES7	1147	1811	6773	2364	576	4596	6295	5559	4738	5919	947	1005	1030	6418	3770	1935	991	1112	16655	6503	2249	1021	1561	1238	1970	1014	1647	2098	2188	1913	1020	5195	1656	1091	1897	885	1429	1106	1115	1102	1080	1608	1444	1174	1681	824	2144	971
MA0823.1	HEY1	1344	1948	8653	2544	453	4087	5623	5182	4886	5042	1151	992	1142	5867	3374	2636	1103	816	18079	5834	2037	906	1668	1265	1972	1012	1762	2302	2039	1837	1148	4864	1962	1004	1957	1112	1616	1250	948	1344	1262	1466	1388	1107	1716	956	1834	835
MA0825.2	MNT	0	0	0	0	0	0	0	0	0	0	0	0	0	0	0	0	0	0	0	0	0	0	0	0	0	0	0	0	0	0	0	0	0	0	0	0	0	0	0	0	0	0	0	0	0	0	0	0
MA0826.1	OLIG1	2381	4757	9607	6023	2330	7702	9537	8836	7286	9615	2646	2712	3065	8089	6680	4518	2941	2467	23313	10206	3581	2338	2645	2203	3155	1950	2731	3216	3761	2726	2237	8290	2647	1968	3137	1654	1705	1862	1967	1875	2030	2355	2447	2402	3047	1477	3472	1703
MA0827.1	OLIG3	3058	5110	11670	7792	2632	8446	10738	10156	7821	10578	3349	3318	3837	8937	7487	4872	3662	2721	21007	11569	3820	2548	2920	2512	3429	2215	3060	3605	4264	3104	2337	9626	2870	2188	3588	1833	2015	2014	2295	1997	2268	2762	2738	2595	3473	1638	4143	1984
MA0828.3	SREBF2	2011	3340	9639	3940	1110	7544	9020	7991	5210	9269	3514	4290	3794	6877	5759	3547	3854	1681	15574	8868	2380	1345	1439	1217	1970	1235	1661	1986	2493	1991	1306	5685	1822	1290	2009	1112	960	1249	1290	1146	1377	1806	1604	1286	1857	887	2179	1179
MA0829.3	SREBF1	2462	6302	11690	5013	1794	10787	12659	11329	8301	13229	3917	4620	4284	10969	8144	3860	4254	2493	25133	12851	3584	2699	2586	2138	3435	2056	2815	3523	4552	3505	2400	10468	3075	2463	3581	1910	1635	2025	2403	2087	2360	3306	2925	2509	3267	1402	4156	2245
MA0830.3	TCF4	4487	11304	24512	9124	3408	20521	26159	23447	21187	25925	4925	5488	5206	23662	17065	10619	5551	6270	77357	26410	10147	5555	6363	4846	8032	4561	6804	8501	12510	9078	5224	27325	7109	6543	8568	4256	4586	4949	6116	4941	5042	8748	7471	5233	7491	3032	11210	5767
MA0831.3	TFE3	2094	3924	12569	4547	1944	7101	9913	8680	5833	8571	4604	5220	5182	8365	7485	6499	4977	1637	19297	10129	2821	1487	1763	1432	2259	1338	1778	2210	2542	2231	1296	5731	2061	1341	2325	1223	1337	1501	1284	1390	1457	1950	1729	1526	2137	1147	2283	1253
MA0832.2	Tcf21	3389	8504	12287	7578	3619	17178	20954	18475	14741	21008	5005	5656	5388	20682	14009	7625	5475	4957	50163	21091	6704	4848	5451	4389	6888	4128	5520	6848	9275	6904	4897	21165	6160	4929	6738	3833	3131	4096	4893	4448	4697	6219	5779	4673	6490	2903	8505	4340
MA0833.3	ATF4	3216	5789	10608	6557	2749	9812	12954	11479	8406	12067	3974	4148	4318	10107	8863	4590	4122	3009	24163	13414	4802	3095	3245	2802	4154	2622	3470	4245	5314	3953	3076	12458	3642	2982	4136	2449	2140	2649	2832	2510	2892	3697	3472	3064	4040	1788	5001	2642
MA0834.2	ATF7	2206	3702	10321	4027	1084	3502	4629	4132	2763	4224	1250	1334	1398	3935	3526	2076	1340	1077	11060	4939	1410	876	976	745	1471	799	979	1383	1503	1258	940	3436	1238	775	2069	957	597	888	802	803	940	1093	1098	1013	1395	544	1506	671
MA0835.3	BATF3	1919	4414	4854	3021	1597	8119	10318	9262	5568	9852	2461	3455	2831	8261	7371	3037	2951	1919	19319	10648	2983	2068	2129	1758	2779	1674	2285	2900	3823	2963	1988	8337	2658	1989	3020	1645	1462	1799	2054	1694	1866	2557	2441	2030	2939	1227	3508	1899
MA0836.3	CEBPD	3872	7545	11163	9560	3064	10810	13695	12568	9153	13092	4511	4481	4592	28666	9602	5726	4600	3878	25690	14223	5952	3729	3868	3436	5110	3032	4279	5382	6939	4709	3174	14371	4109	3479	4928	2596	2821	2996	3346	2837	3220	4287	4031	3607	4873	2262	6098	3124
MA0837.3	CEBPE	1626	2235	5391	3621	1182	3542	4590	4225	2718	4131	1376	1320	1281	6947	3001	2081	1354	1471	8572	4783	1710	970	1061	942	1448	806	1137	1418	1748	1206	848	3553	1059	875	1210	654	703	783	786	760	829	1086	1010	999	1230	617	1384	746
MA0838.1	CEBPG	1501	2208	5590	4353	1122	3471	4542	4195	2749	4025	1360	1290	1285	6831	3169	2052	1319	1384	8906	4707	1716	993	1075	903	1400	782	1184	1459	1800	1244	877	3577	1152	851	1219	694	675	817	774	789	852	1062	1013	978	1312	600	1500	748
MA0839.2	CREB3L1	1360	2277	7381	2256	804	3904	5302	4737	3343	4800	1325	1235	1320	4324	3590	2226	1368	952	13217	5305	1796	1040	1335	919	1572	869	1452	1764	2026	1535	1108	4646	1620	954	1676	911	991	1131	951	1111	1098	1288	1340	1047	1433	699	1816	847
MA0840.2	Creb5	2547	4440	10891	5044	1110	4373	5706	5103	3368	5243	1560	1669	1803	4981	3738	2438	1741	1299	11355	6023	1667	1102	1234	952	1744	1059	1294	1677	1989	1646	1198	4735	1554	1071	2459	1205	778	1188	1084	1034	1190	1514	1422	1226	1715	681	1943	929
MA0841.2	NFE2	2218	3746	6384	3645	2110	8152	10169	9504	6712	10145	2530	2897	2774	8687	7769	3564	2810	2060	20427	10613	3502	2399	2286	1897	3210	1920	2565	3266	4046	3304	2214	8935	2807	2119	3286	1725	1658	1984	2214	1862	2060	2797	2646	2248	3110	1400	3779	2026
MA0842.3	NRL	2727	4945	10642	5902	2109	9295	11816	10398	8088	11405	2874	3886	3297	9509	7945	4073	3378	2656	23612	11719	3860	3035	3210	2770	4024	2649	3505	4254	5376	3958	3134	12378	3731	2851	4205	2446	2164	2625	2829	2601	2946	3665	3384	2887	3884	1745	4989	2604
MA0843.2	TEF	2169	2701	7179	5125	1504	4691	6139	5763	3649	5585	1691	1821	2079	5186	3892	1938	1947	1246	9506	6589	1818	1227	1509	1230	1716	1084	1612	1651	2129	1712	1295	5165	1523	1238	1694	998	960	1025	1254	1100	1174	1503	1448	1196	1665	881	2189	1133
MA0844.2	XBP1	967	1470	8347	1504	654	2171	3526	2742	1742	2748	816	597	783	2515	2053	1598	758	478	7468	3183	978	584	748	535	938	483	828	1065	898	831	611	2142	898	505	798	513	546	623	451	614	628	596	704	588	866	453	834	372
MA0845.1	FOXB1	7677	12004	23990	16998	6530	15940	21123	19278	12399	19612	6876	10306	8561	16801	13543	7282	7977	5052	56968	21746	8467	4341	6656	4466	6141	3918	7292	6374	8298	5853	5166	19590	5517	4558	6527	3635	4171	3797	4602	3542	4349	5317	5139	4365	6116	2792	8400	4158
MA0846.2	FOXC2	7727	16205	23866	16755	7002	18445	23469	22009	13781	22638	8036	11708	10072	18754	16285	9306	9187	6350	69959	24911	10357	5189	8768	5137	7302	4611	9456	7695	10056	7029	6817	23450	7070	5442	7705	4653	4773	4748	5612	4424	5656	6432	6286	5272	7163	3219	9986	4842
MA0847.4	FOXD2	7307	18043	24578	17903	7095	20155	25158	23586	15271	25279	8650	12425	10407	20844	18572	9994	9817	6312	72759	26726	10798	5664	8900	5650	7879	4988	9611	8485	10870	7648	6955	25183	7555	5570	8523	4954	4997	5189	5905	4832	5857	6923	6879	5754	7687	3531	10443	4917
MA0848.1	FOXO4	2985	5801	12070	6347	2154	9133	11351	10513	6710	11360	2390	2568	3239	9205	6940	4054	2840	2226	21405	12116	3227	2363	2807	2237	3370	2246	2955	3511	4139	3236	2382	9227	2869	2366	3461	1851	1643	1977	2234	1987	2273	2873	2906	2618	3381	1558	4062	2119
MA0849.1	FOXO6	2985	5801	12070	6347	2154	9133	11351	10513	6710	11360	2390	2568	3239	9205	6940	4054	2840	2226	21405	12116	3227	2363	2807	2237	3370	2246	2955	3511	4139	3236	2382	9227	2869	2366	3461	1851	1643	1977	2234	1987	2273	2873	2906	2618	3381	1558	4062	2119
MA0850.1	FOXP3	2985	5801	12070	6347	2154	9133	11351	10513	6710	11360	2390	2568	3239	9205	6940	4054	2840	2226	21405	12116	3227	2363	2807	2237	3370	2246	2955	3511	4139	3236	2382	9227	2869	2366	3461	1851	1643	1977	2234	1987	2273	2873	2906	2618	3381	1558	4062	2119
MA0851.2	Foxj3	6634	15442	24005	13767	6954	15089	19263	18019	11120	18274	7067	11163	9443	15450	14823	8911	8058	5707	66274	20457	9400	4149	6838	4196	5839	3738	7435	6305	8189	5789	5372	18629	5510	4437	6160	3598	3679	3679	4338	3625	4324	5375	5180	4388	5719	2601	8110	3980
MA0852.3	FOXK1	2985	5801	12070	6347	2154	9133	11351	10513	6710	11360	2390	2568	3239	9205	6940	4054	2840	2226	21405	12116	3227	2363	2807	2237	3370	2246	2955	3511	4139	3236	2382	9227	2869	2366	3461	1851	1643	1977	2234	1987	2273	2873	2906	2618	3381	1558	4062	2119
MA0853.2	Alx4	2771	4062	7928	6166	1787	6915	9212	8293	7350	8423	2393	2761	2837	7259	6806	2814	2699	1864	14826	9261	2635	1747	2322	1809	2794	1670	2526	3293	4172	2814	2091	9405	2278	2173	3127	1504	1633	1699	2208	1663	1894	2658	2488	1870	2707	1182	3977	1933
MA0854.2	Alx1	4660	5742	10158	8684	2376	10082	13144	11930	9560	12448	3898	4678	4554	10464	10258	4190	4428	2400	22648	13108	4088	2616	3558	2834	4248	2562	3920	4954	6294	4294	3194	13692	3462	3402	4740	2244	2558	2584	3550	2416	2844	4160	3862	2822	4044	1852	6214	3094
MA0855.1	RXRB	2125	5961	9651	5623	1980	8253	10774	9663	6940	10209	2270	3353	2597	8966	7498	4565	2645	2126	26550	11165	3416	2272	2230	1857	2821	1709	2574	3096	3998	2906	1857	9165	2454	2084	3172	1395	1510	1622	2045	1573	1739	2826	2559	2129	2877	1290	3748	1761
MA0856.1	RXRG	2090	5870	9343	5405	2019	8109	10482	9546	6910	9957	2338	3156	2815	8725	7334	4450	2763	2138	26214	10989	3392	2190	2234	1807	2788	1691	2543	3002	3916	2899	1802	9030	2276	1998	3094	1384	1513	1605	1987	1561	1715	2699	2487	2039	2843	1244	3635	1760
MA0857.1	Rarb	2254	6151	8422	4955	2355	8311	10790	9556	7537	10403	2257	2869	2668	8358	6599	4552	2520	2306	24138	10603	3478	2609	2196	1874	2883	1827	2457	3351	3898	2843	1904	9320	2457	2074	3246	1540	1541	1709	2108	1568	1810	2843	2614	2281	3029	1313	3725	1876
MA0858.1	Rarb	1529	3307	7736	4181	1350	5943	7334	6798	5646	7433	1628	1839	1827	6456	6475	2745	1641	1559	19571	7675	2472	1801	1738	1453	2199	1339	1758	2469	3122	2215	1658	7425	1958	1527	2470	1241	1215	1370	1554	1325	1488	2035	2026	1670	2217	1027	2954	1456
MA0859.2	Rarg	2127	5747	8689	4700	2466	7887	10471	9221	6999	9973	2197	2813	2641	7886	6436	4609	2596	2097	25718	10282	3518	2070	2036	1696	2555	1473	2136	2858	3510	2516	1656	8220	2220	1811	2841	1438	1356	1497	1798	1410	1615	2497	2321	1889	2649	1114	3315	1671
MA0860.1	Rarg	1518	3367	7229	4225	1402	6468	8473	7652	6130	8210	1757	2139	2028	7210	6122	3509	2046	1806	21585	8639	2866	1869	1719	1428	2275	1315	1806	2724	3202	2362	1616	7424	2102	1506	2500	1207	1253	1363	1514	1296	1484	2185	1954	1820	2256	951	3046	1484
MA0861.2	TP73	1435	2746	6497	3345	1155	5301	6790	5936	6501	6565	1381	1386	1507	5983	4297	2578	1447	1658	17254	6813	3008	1693	1760	1510	2293	1339	1909	2427	2592	2043	1413	6607	1938	1337	2202	1113	1205	1266	1403	1315	1301	1816	1662	1694	2248	934	2547	1153
MA0862.1	GMEB2	639	927	3083	1114	290	1408	1782	1564	925	1600	318	385	373	2784	1294	693	429	307	3359	1811	461	480	431	386	722	339	530	704	490	455	394	1055	614	237	422	364	254	445	217	436	380	235	347	477	561	396	425	192
MA0863.1	MTF1	1827	3244	9905	3645	1012	5673	7734	6362	4493	7099	1181	1309	1279	6999	5111	2728	1343	1668	18325	7623	2495	1911	1629	1429	2057	1178	1771	2147	2737	2032	1523	6483	2089	1366	2042	1297	1282	1411	1326	1424	1538	1830	1667	1491	2027	869	2450	1232
MA0864.3	E2F2	675	1520	4903	2581	433	1618	2469	1785	771	1814	364	347	436	1957	1145	996	504	308	5173	2345	751	151	155	179	220	103	159	204	234	212	128	486	182	142	176	104	178	119	81	100	143	158	151	174	182	115	238	92
MA0865.3	E2F8	588	1516	5756	1646	933	2770	4466	3361	1764	3307	925	1023	1047	3419	2190	3176	888	621	13604	4300	1287	398	409	544	750	320	396	588	813	587	285	1149	430	260	502	240	555	320	279	287	274	410	445	386	687	308	624	225
MA0866.1	SOX21	3584	6480	10445	9394	2655	9939	12403	11482	8080	12344	3817	4144	4251	11614	8707	4645	4061	2991	22341	12915	3868	3168	3225	2528	3970	2513	3562	4059	5653	4103	2861	13094	3501	2917	4257	2404	1955	2472	2948	2271	2856	3803	3363	2937	4023	1646	5274	2617
MA0867.3	SOX4	4255	7981	12166	9080	4292	15436	20411	18132	12161	19629	5567	5947	6253	16281	13605	7642	6214	4822	36804	21074	6643	4466	4925	3763	5936	3665	5383	6276	7936	6192	4579	17707	5567	4461	6370	3646	2958	3925	4244	3815	4367	5690	5320	4409	5877	2694	7407	3944
MA0868.3	SOX8	3636	6009	11484	9244	3200	10419	14172	12863	8459	13076	4379	4576	4763	11168	9176	5412	4704	3230	24521	14467	4940	2680	3101	2401	3673	2201	3303	3581	5096	3709	2588	10463	3199	2708	3771	2050	1756	2380	2581	2167	2590	3443	3160	2695	3717	1435	4527	2536
MA0869.3	Sox11	4779	8930	12741	8899	4461	15764	20384	18204	13058	20111	5583	5648	6346	16395	13683	7492	6255	4847	36560	20900	6984	4950	5641	4356	6732	4075	6077	7061	9937	7046	5190	20365	6438	4962	7201	4137	3491	4438	4879	4365	4852	6284	6012	4976	6533	3029	8457	4423
MA0870.1	Sox1	2926	5011	9785	8560	2236	9000	11295	10262	6669	11286	2831	3022	3167	9895	7303	3693	3039	2732	20711	11729	3393	3055	2459	1946	3171	1948	2812	3311	4479	3175	2298	10366	2733	2254	3331	1956	1556	1950	2321	1880	2220	3075	2790	2782	3102	1273	4303	2170
MA0871.3	TFEC	1674	2568	10078	3610	654	4688	6197	5686	4358	5595	2272	2667	2586	5814	4060	3229	2502	1072	15468	6368	2076	957	1443	1102	1854	1016	1509	1909	1902	1744	1101	4386	1729	1062	1936	1030	1193	1234	1006	1153	1167	1508	1358	1108	1649	864	1791	893
MA0872.1	TFAP2A	1585	7823	10840	8245	2872	12320	17147	14799	13187	16343	2168	3082	2689	19604	10210	5478	2833	2590	54905	17125	5168	2659	3246	2498	3879	2051	3538	4694	6561	4051	2262	12373	3439	2864	4463	1868	2595	2144	2520	2333	2104	4228	3814	2595	3732	1495	5220	2534
MA0873.2	HOXD12	1338	2414	4763	2792	951	2691	3628	3061	2665	3202	1898	1999	2209	3226	2536	1352	2121	858	7014	3629	1055	947	1115	860	1414	832	1235	1547	1628	1281	908	3744	1202	905	1372	707	796	911	838	750	857	1081	1151	965	1302	617	1580	793
MA0874.2	Arx	3391	4891	8738	6766	2154	7979	11035	9525	8260	9559	2970	3478	3484	8480	7902	3321	3341	2168	18598	10439	3194	2005	2684	2037	3144	1911	2933	3594	4817	3184	2374	10400	2631	2551	3490	1736	1862	1959	2569	1875	2166	3072	2958	2061	3095	1308	4622	2301
MA0875.2	BARX1	0	0	0	0	0	0	0	0	0	0	0	0	0	0	0	0	0	0	0	0	0	0	0	0	0	0	0	0	0	0	0	0	0	0	0	0	0	0	0	0	0	0	0	0	0	0	0	0
MA0876.2	BSX	0	0	0	0	0	0	0	0	0	0	0	0	0	0	0	0	0	0	0	0	0	0	0	0	0	0	0	0	0	0	0	0	0	0	0	0	0	0	0	0	0	0	0	0	0	0	0	0
MA0877.4	BARHL1	0	0	0	0	0	0	0	0	0	0	0	0	0	0	0	0	0	0	0	0	0	0	0	0	0	0	0	0	0	0	0	0	0	0	0	0	0	0	0	0	0	0	0	0	0	0	0	0
MA0878.3	CDX1	3637	6818	18702	11160	2967	10012	12731	11496	9088	12349	4589	5023	5218	10311	9585	4659	5429	3054	24317	13347	4100	3310	3743	2957	4690	2711	4025	4948	6079	4544	3186	13802	3743	3374	4717	2381	2572	2642	3143	2460	2866	4224	3826	3278	4371	1934	5820	2955
MA0879.3	DLX1	0	0	0	0	0	0	0	0	0	0	0	0	0	0	0	0	0	0	0	0	0	0	0	0	0	0	0	0	0	0	0	0	0	0	0	0	0	0	0	0	0	0	0	0	0	0	0	0
MA0880.2	Dlx3	0	0	0	0	0	0	0	0	0	0	0	0	0	0	0	0	0	0	0	0	0	0	0	0	0	0	0	0	0	0	0	0	0	0	0	0	0	0	0	0	0	0	0	0	0	0	0	0
MA0881.2	Dlx4	0	0	0	0	0	0	0	0	0	0	0	0	0	0	0	0	0	0	0	0	0	0	0	0	0	0	0	0	0	0	0	0	0	0	0	0	0	0	0	0	0	0	0	0	0	0	0	0
MA0882.2	DLX6	0	0	0	0	0	0	0	0	0	0	0	0	0	0	0	0	0	0	0	0	0	0	0	0	0	0	0	0	0	0	0	0	0	0	0	0	0	0	0	0	0	0	0	0	0	0	0	0
MA0883.2	Dmbx1	1282	2138	5294	4095	1248	4801	6285	5393	3489	5815	1630	1854	1809	5519	3975	2099	1845	1339	13009	6580	1709	1196	1283	1112	1703	1028	1419	1839	2357	1691	1072	4881	1378	1077	1734	834	936	1000	1111	870	1016	1503	1360	1190	1694	712	2169	1030
MA0884.2	DUXA	2934	4670	6890	5485	1957	8732	10773	10077	7446	10518	3133	3817	3853	8897	10017	3143	3789	1952	19544	11106	3045	2066	2512	2073	3101	2115	2712	3311	4398	3105	2147	10128	2537	2299	3332	1699	1754	1863	2297	1660	2045	2864	2534	2141	3065	1397	4228	2085
MA0885.3	Dlx2	1853	3241	6912	5999	1799	6318	8703	7462	6061	7719	2506	3106	2954	6806	5566	3065	2924	1869	14346	8725	2801	2114	2398	1896	2967	1813	2528	3303	3846	2845	2039	8788	2502	2064	2907	1709	1646	1814	1996	1739	2069	2642	2463	2085	2852	1307	3718	1909
MA0886.2	EMX2	0	0	0	0	0	0	0	0	0	0	0	0	0	0	0	0	0	0	0	0	0	0	0	0	0	0	0	0	0	0	0	0	0	0	0	0	0	0	0	0	0	0	0	0	0	0	0	0
MA0887.2	EVX1	0	0	0	0	0	0	0	0	0	0	0	0	0	0	0	0	0	0	0	0	0	0	0	0	0	0	0	0	0	0	0	0	0	0	0	0	0	0	0	0	0	0	0	0	0	0	0	0
MA0888.2	EVX2	0	0	0	0	0	0	0	0	0	0	0	0	0	0	0	0	0	0	0	0	0	0	0	0	0	0	0	0	0	0	0	0	0	0	0	0	0	0	0	0	0	0	0	0	0	0	0	0
MA0889.2	GBX1	1755	4975	7854	5374	1818	5821	7725	6837	4965	7155	2647	2950	3241	6880	5232	2810	3097	1699	17839	7692	2629	1429	1540	1278	2142	1205	1689	2232	2981	2108	1447	6064	1790	1536	2065	1090	998	1156	1463	1150	1314	1971	1765	1399	2011	814	2657	1371
MA0890.2	GBX2	0	0	0	0	0	0	0	0	0	0	0	0	0	0	0	0	0	0	0	0	0	0	0	0	0	0	0	0	0	0	0	0	0	0	0	0	0	0	0	0	0	0	0	0	0	0	0	0
MA0891.2	GSC2	0	0	0	0	0	0	0	0	0	0	0	0	0	0	0	0	0	0	0	0	0	0	0	0	0	0	0	0	0	0	0	0	0	0	0	0	0	0	0	0	0	0	0	0	0	0	0	0
MA0892.2	GSX1	0	0	0	0	0	0	0	0	0	0	0	0	0	0	0	0	0	0	0	0	0	0	0	0	0	0	0	0	0	0	0	0	0	0	0	0	0	0	0	0	0	0	0	0	0	0	0	0
MA0893.3	GSX2	2763	4491	8029	10890	2879	7582	9621	8324	6557	9037	2501	2943	2977	8134	6351	2864	3002	1805	14240	9866	2511	2405	2898	2266	3498	2145	3105	3804	4535	3434	2546	9991	3036	2361	3446	1931	1809	2204	2490	2027	2379	3053	2979	2397	3248	1510	4392	2213
MA0894.2	HESX1	0	0	0	0	0	0	0	0	0	0	0	0	0	0	0	0	0	0	0	0	0	0	0	0	0	0	0	0	0	0	0	0	0	0	0	0	0	0	0	0	0	0	0	0	0	0	0	0
MA0895.2	HMBOX1	2091	4643	5036	5118	1893	8318	10321	9558	6480	10447	2443	2655	2808	9061	7946	2908	2878	1893	16321	10857	2479	1939	2183	1964	2912	1812	2432	2848	3248	2433	1942	7223	2284	1692	2746	1513	1509	1685	1721	1527	1756	2188	2007	2073	2838	1380	3319	1525
MA0896.2	Hmx1	3034	4932	7842	7703	2473	9169	12029	10772	7963	11330	3975	4828	4854	9710	8369	4236	4809	2712	20736	12476	4066	2734	3299	2542	4118	2340	3450	4333	5330	3919	2791	12220	3237	2880	4014	2170	2222	2356	2779	2299	2803	3602	3399	2738	4016	1714	5264	2574
MA0897.2	Hmx2	2669	4536	7290	6197	2055	7131	9524	8524	6272	8828	3525	4284	4241	8166	6975	3629	4191	2163	18412	9675	3217	2176	2553	1901	3054	1802	2736	3191	4180	3067	2112	10160	2465	2250	3149	1700	1642	1747	2144	1696	2052	2788	2640	2144	3040	1231	4036	1954
MA0898.2	Hmx3	2520	4229	7256	6426	2088	7655	10319	9064	6727	9494	3467	4279	4188	8486	7302	3754	4154	2361	17931	10426	3560	2307	2774	2137	3433	1968	2926	3625	4474	3248	2358	10185	2741	2385	3360	1866	1897	2003	2295	1919	2369	2983	2803	2316	3388	1460	4337	2132
MA0899.2	HOXA10	5724	9373	26874	19584	4787	13046	16754	15444	11367	15814	5972	7126	6873	13908	12379	7257	6719	4372	39204	17643	6049	4433	5368	4027	6478	3776	5790	6796	8317	6246	4441	18693	5229	4631	6410	3337	3545	3697	4464	3330	4083	5670	5261	4464	5942	2603	8183	4066
MA0900.3	HOXA2	0	0	0	0	0	0	0	0	0	0	0	0	0	0	0	0	0	0	0	0	0	0	0	0	0	0	0	0	0	0	0	0	0	0	0	0	0	0	0	0	0	0	0	0	0	0	0	0
MA0901.3	HOXB13	5039	10701	23804	14964	4461	14083	18222	16538	12616	16727	6401	7435	7561	15376	12418	8054	7499	4258	42815	18843	6439	4293	4840	4059	5954	3670	5278	6148	8502	5901	3864	18460	4564	4430	6107	3053	3339	3331	4339	2940	3663	5824	5188	4080	5756	2541	7977	4006
MA0902.3	HOXB2	0	0	0	0	0	0	0	0	0	0	0	0	0	0	0	0	0	0	0	0	0	0	0	0	0	0	0	0	0	0	0	0	0	0	0	0	0	0	0	0	0	0	0	0	0	0	0	0
MA0903.2	HOXB3	0	0	0	0	0	0	0	0	0	0	0	0	0	0	0	0	0	0	0	0	0	0	0	0	0	0	0	0	0	0	0	0	0	0	0	0	0	0	0	0	0	0	0	0	0	0	0	0
MA0904.3	HOXB5	0	0	0	0	0	0	0	0	0	0	0	0	0	0	0	0	0	0	0	0	0	0	0	0	0	0	0	0	0	0	0	0	0	0	0	0	0	0	0	0	0	0	0	0	0	0	0	0
MA0905.2	HOXC10	2002	3682	6223	4026	1454	4656	5410	4733	4217	5784	2886	3000	3216	5079	3922	2026	3188	1387	10353	5544	1741	1475	1722	1371	2165	1338	1923	2337	2696	2052	1471	6153	1887	1551	2218	1151	1297	1420	1445	1191	1452	1822	1859	1553	2141	971	2673	1349
MA0906.2	HOXC12	1637	3308	5615	3697	1175	3401	4603	3957	3635	4134	2599	2954	3118	4059	3379	1802	3026	1056	8849	4519	1373	1161	1440	1167	1803	1063	1499	1879	2038	1619	1179	4834	1468	1151	1766	905	983	1119	1150	938	1100	1376	1443	1197	1625	793	2076	1015
MA0907.2	HOXC13	1987	4143	6769	4463	1623	5836	7698	6654	5483	6815	2212	2862	2685	6999	5521	2729	2706	1680	15892	7791	2279	2094	2337	1886	2900	1715	2434	2983	3600	2772	1983	8238	2421	1969	2912	1506	1592	1802	1913	1594	1826	2461	2426	2030	2889	1301	3558	1746
MA0908.2	HOXD11	1857	3485	5851	3767	1386	3861	4998	4379	3593	4469	2698	2852	3130	4383	3575	1798	3086	1194	9461	5007	1506	1276	1551	1187	1924	1164	1656	2055	2339	1762	1259	5165	1592	1355	1911	962	1118	1217	1207	1012	1213	1552	1582	1341	1885	841	2222	1153
MA0909.4	Hoxd13	5657	10129	27792	15390	4924	12451	16110	14835	11289	15016	6453	8100	7535	14069	12490	8672	7563	4511	41661	16687	6659	4144	4568	3695	5612	3499	4953	5872	7845	5665	3859	17279	4563	4283	5777	2941	3195	3218	4083	3049	3638	5457	4877	3883	5500	2337	7417	3841
MA0910.3	HOXD8	1721	3025	7110	5687	1600	6040	7812	7022	4761	7322	1816	2071	2195	6540	5242	2657	2163	1652	14695	8126	2419	1665	1589	1339	2136	1294	1723	2190	2539	2016	1583	5758	1831	1428	2021	1143	1142	1254	1345	1285	1361	1764	1720	1627	2031	860	2552	1379
MA0911.2	Hoxa11	1714	2922	5481	3497	1226	3426	4450	3930	3310	4035	2121	2191	2337	4362	3204	1710	2375	1077	8829	4561	1435	1214	1391	1136	1803	1069	1561	1946	2131	1662	1201	4873	1556	1267	1770	942	1072	1158	1165	1010	1182	1454	1483	1261	1738	789	2106	1097
MA0912.2	HOXD3	2007	3751	6604	5585	1699	6692	8522	7217	6007	7701	1933	2351	2312	7286	5370	2446	2305	1844	12520	8447	2123	1952	2322	1861	2801	1762	2432	3105	3617	2809	2023	8049	2279	1942	2864	1552	1510	1687	1886	1626	1833	2575	2296	1968	2722	1258	3570	1838
MA0913.3	HOXD9	4547	7630	20328	12822	3806	11227	14645	13225	9909	13446	4870	5966	5552	11787	10842	5828	5575	3770	31256	15159	5165	3886	4402	3374	5481	3202	4786	5825	7257	5398	3743	16173	4455	3971	5525	2772	2960	3120	3800	2835	3415	5003	4531	3846	5148	2195	6894	3514
MA0914.2	ISL2	0	0	0	0	0	0	0	0	0	0	0	0	0	0	0	0	0	0	0	0	0	0	0	0	0	0	0	0	0	0	0	0	0	0	0	0	0	0	0	0	0	0	0	0	0	0	0	0
MA1099.3	HES1	873	1276	7287	1565	268	2405	3422	3124	2407	3278	809	885	1043	3042	2012	1878	1034	592	9884	3905	1219	438	799	802	1055	439	808	1008	969	859	474	1929	865	440	866	512	937	654	435	633	610	700	601	523	850	539	801	356
MA1100.3	ASCL1	4231	9192	23191	10417	4170	26600	32023	29375	27395	32471	5807	8063	6085	29344	22247	12675	6437	8385	90240	33721	12499	7576	8512	6880	10871	6254	9318	10617	16105	12539	7504	36914	10082	8621	10926	6001	6048	6729	8410	7258	7243	11856	10047	7467	10181	4305	15258	7870
MA1101.3	BACH2	1869	3651	5600	3067	1739	8110	10276	9617	6304	10008	2122	2712	2366	8438	7365	3106	2360	1892	20823	10925	3194	2528	2171	1807	2980	1722	2465	2939	3885	3074	2061	8632	2739	2023	3077	1721	1593	1943	2123	1783	2062	2648	2448	2236	2850	1316	3557	1904
MA1102.3	CTCFL	2754	6287	13777	8841	2067	12585	17654	15195	12116	15748	2509	3607	3132	16156	10576	7121	3318	2800	51839	17679	5864	2395	2910	2206	3233	1972	3207	3847	4164	3426	2069	8978	3167	2267	3302	1760	2266	2122	2018	2077	2073	3164	2723	2282	3360	1330	4071	1924
MA1103.3	FOXK2	2985	5801	12070	6347	2154	9133	11351	10513	6710	11360	2390	2568	3239	9205	6940	4054	2840	2226	21405	12116	3227	2363	2807	2237	3370	2246	2955	3511	4139	3236	2382	9227	2869	2366	3461	1851	1643	1977	2234	1987	2273	2873	2906	2618	3381	1558	4062	2119
MA1104.3	GATA6	1627	3381	7262	5216	1837	6674	7897	7262	6257	8127	2919	3004	3292	7259	5448	3091	3347	2170	17079	8233	2860	2338	2499	2060	3045	1817	2510	3131	4132	2929	2224	8556	2772	2100	2970	1763	1709	1931	2063	1769	2125	2661	2391	2213	3028	1397	3765	1847
MA1105.3	GRHL2	3225	5991	12441	7755	2475	12438	15604	14452	12973	16236	4567	4794	4798	14747	9949	5295	4834	3991	33165	16513	5358	4255	4068	3317	5353	3212	4511	6551	6726	5293	3588	14688	4263	3601	5736	2770	2840	3110	3518	2981	3308	4626	4397	4471	5359	2212	6158	3214
MA1106.2	HIF1A	0	0	0	0	0	0	0	0	0	0	0	0	0	0	0	0	0	0	0	0	0	0	0	0	0	0	0	0	0	0	0	0	0	0	0	0	0	0	0	0	0	0	0	0	0	0	0	0
MA1107.3	KLF9	7318	28090	31953	13735	5426	24221	37334	37366	21945	34203	10659	11379	14384	33702	22469	20122	14688	6778	126074	39193	12057	3715	4339	3819	5298	3617	4670	6572	9008	6171	3834	22957	4852	4315	6260	2915	2849	3141	4138	3000	3206	6821	5069	3741	5527	2600	8019	3804
MA1108.3	MXI1	0	0	0	0	0	0	0	0	0	0	0	0	0	0	0	0	0	0	0	0	0	0	0	0	0	0	0	0	0	0	0	0	0	0	0	0	0	0	0	0	0	0	0	0	0	0	0	0
MA1109.2	NEUROD1	4585	9974	14170	9096	4370	17622	21500	19739	16852	21793	5686	6006	5733	21016	15444	9247	5647	6061	55869	22436	8296	5246	5679	4435	6967	4494	6057	7589	10288	7394	5350	21721	6823	5376	7376	4340	3650	4596	5122	4756	5136	6929	6127	5203	6899	2917	9195	4854
MA1110.3	Nr1H4	0	0	0	0	0	0	0	0	0	0	0	0	0	0	0	0	0	0	0	0	0	0	0	0	0	0	0	0	0	0	0	0	0	0	0	0	0	0	0	0	0	0	0	0	0	0	0	0
MA1111.2	NR2F2	2042	4645	7769	4474	2665	7987	11127	9531	6548	10015	2669	3225	3024	8123	7804	4575	3048	2268	23183	11002	3513	2517	2486	1998	3261	1957	2574	3419	4083	3144	2185	8973	2760	2138	3525	1717	1751	1903	2237	1815	2124	2815	2659	2281	3201	1386	3844	1982
MA1112.3	NR4A1	3784	7935	15424	10296	3774	13298	17315	15289	11883	16222	4628	5395	5058	15273	12345	7134	5141	4811	38601	17515	6601	4151	4486	3779	5757	3535	4721	6274	7562	5667	3879	16897	4911	4016	6155	3133	3332	3368	4121	3117	3710	5283	4993	4122	5594	2631	7265	3674
MA1113.3	PBX2	3540	5875	12741	8177	3009	10161	12988	11611	9034	12040	4723	5083	5343	10518	9629	5576	5233	2997	23572	13071	4658	3334	3740	3032	4539	2867	4110	4829	6318	4600	3267	13868	3793	3306	4770	2514	2680	2823	3369	2597	3048	4199	3867	3373	4410	1951	5934	3111
MA1114.2	PBX3	4065	7233	13538	7834	2268	13915	17372	15736	11461	16889	3751	3894	3678	15053	11467	6210	3563	3652	43756	17728	5708	4197	3795	3232	4938	3147	4171	5675	7604	5614	3579	17250	4435	3879	5942	2816	2599	3117	3861	3050	3313	5287	4846	3884	5057	2057	6899	3589
MA1115.2	POU5F1	5467	9143	14268	11034	4127	14595	18502	16893	12937	18338	6807	6541	6051	21680	12419	8785	5924	5702	36233	19540	8615	5020	5184	4687	7054	4057	5629	6936	8734	6643	4724	19306	5684	4640	6634	3646	3821	4114	4734	3847	4595	5803	5638	4913	6391	3119	8400	4232
MA1116.2	RBPJ	0	0	0	0	0	0	0	0	0	0	0	0	0	0	0	0	0	0	0	0	0	0	0	0	0	0	0	0	0	0	0	0	0	0	0	0	0	0	0	0	0	0	0	0	0	0	0	0
MA1117.2	RELB	931	4212	7220	4644	1640	7006	9607	8761	5305	8546	2157	2324	2642	7156	6498	3430	2514	1693	24176	10120	2864	1646	1721	1331	2216	1250	1793	2300	3269	2360	1359	6984	1745	1715	2585	1171	1145	1302	1654	1148	1351	2326	2095	1529	1991	790	3144	1550
MA1118.2	SIX1	2705	5106	11364	5719	2238	10020	13036	11358	8702	12531	3277	3393	3423	10478	8835	10448	3615	2769	23578	12845	4275	3689	3496	2970	4588	2950	3670	4692	6030	4448	3123	13232	3907	3249	4724	2412	2291	2679	3132	2510	3024	4100	3839	3476	4593	1994	5621	2820
MA1119.2	SIX2	3108	5975	10850	6739	2557	11901	15763	13827	9821	15338	3714	3886	4018	12052	10028	7952	4101	3177	26400	15903	4798	3737	3860	3285	4881	3157	4089	5220	6613	4812	3535	14852	4513	3407	5302	2804	2532	3106	3533	2995	3431	4703	4266	3705	4906	2158	6154	3057
MA1120.2	SOX13	2479	4487	11298	6766	2365	9146	12143	11257	6390	11326	3429	4509	3644	9106	8839	4404	3688	2701	27196	12944	3706	1695	1862	1285	2237	1345	1882	2328	3220	2434	1644	6772	1927	1840	2439	1300	963	1466	1659	1326	1574	2265	2151	1860	2364	885	2881	1647
MA1121.2	TEAD2	1926	3987	8529	5433	2009	7534	9692	8545	5328	9435	2441	2750	2710	8515	6653	4413	2841	2735	21710	10086	4301	2143	2004	1687	2609	1623	2206	2843	4409	3236	2041	9423	2484	2434	3448	1648	1576	1678	2395	1603	1957	3168	2969	2111	2598	1012	4306	2187
MA1122.2	TFDP1	628	1770	6760	1588	1175	3696	5971	4564	1986	4611	1074	1513	1373	4640	2993	4402	1161	782	16247	5659	1816	809	711	1002	1311	503	732	1095	1465	1209	493	2281	782	483	959	411	1169	595	614	557	506	786	902	727	1122	487	1344	455
MA1123.3	TWIST1	4234	8669	15185	8209	4368	17719	21594	20282	16845	21799	5619	6135	5715	21059	15222	10183	5759	5977	57078	22916	8473	5223	5518	4444	6868	4422	6032	7595	10014	7285	5167	21566	6397	5298	7275	4247	3734	4422	5212	4573	4958	6889	6044	5196	6996	2921	9087	4753
MA1124.1	ZNF24	5891	6498	12502	8995	3244	11730	14678	13312	9809	14171	5617	6391	6423	11629	10644	6453	6276	3867	32942	14891	6622	3514	3845	3152	4584	2991	4079	4851	6927	4593	3841	18680	4524	3637	4796	3043	2561	3138	3385	2796	3547	4784	3818	3608	4556	2102	6428	3086
MA1125.2	ZNF384	30507	223753	166588	76119	14014	71829	76560	73037	65616	77807	31794	26216	38364	72862	61847	23570	37167	21066	133964	98826	16756	29704	71242	28871	58729	47032	77442	70051	62236	42191	34727	156084	49201	28202	46246	25725	42645	32841	33449	24914	43615	44600	37235	29688	50490	22391	71048	27674
MA1126.2	FOS::JUN	2488	4185	10347	3985	1295	4578	6183	5325	3729	5763	1511	1836	1806	5244	4528	2441	1674	1413	13535	6290	1858	1228	1345	982	1871	1040	1300	1793	2126	1711	1310	4859	1641	1124	2221	1214	836	1160	1148	1068	1230	1481	1408	1376	1862	734	2011	958
MA1127.1	FOSB::JUN	2306	3921	12089	3950	1077	4372	5850	5208	3500	5445	1535	1635	1726	4759	4185	2231	1615	1222	12014	6259	1649	1258	1231	901	1730	1007	1284	1713	1961	1594	1257	4450	1606	1033	2119	1118	705	1101	1066	1035	1260	1396	1387	1282	1750	666	1870	901
MA1128.2	FOSL1::JUN	2085	3612	5794	4079	1838	7595	9415	8529	5677	8995	2482	2660	2720	7744	6804	3150	2708	1869	17453	9739	3185	2249	2272	1920	3028	1837	2420	3142	3814	2984	2131	8296	2870	1958	3047	1740	1597	1948	2096	1802	2058	2615	2452	2176	3058	1352	3481	1848
MA1129.1	FOSL1::JUN	2361	3983	11001	4418	1253	3896	5372	4636	3171	4811	1459	1601	1685	4421	3966	2241	1539	1158	12327	5514	1554	1031	1099	874	1626	895	1125	1532	1738	1446	1119	4114	1393	891	2239	1064	687	959	931	910	1090	1292	1287	1203	1613	617	1759	777
MA1130.2	FOSL2::JUN	2154	3862	5931	4095	1909	7901	9846	8978	5914	9457	2584	2852	2831	8132	7060	3249	2896	1921	18546	10167	3377	2334	2306	1970	3107	1905	2517	3250	4016	3159	2227	8785	2992	2108	3224	1779	1683	1975	2246	1881	2128	2754	2580	2271	3177	1422	3682	1995
MA1131.2	FOSL2::JUN	2795	4714	13743	4898	1456	5082	6760	6030	4378	6206	1681	1809	1905	5641	4872	2760	1800	1512	14799	7055	2019	1348	1507	1137	2020	1213	1511	1967	2469	1990	1479	5663	1850	1305	2902	1400	925	1338	1327	1207	1502	1794	1746	1493	2066	810	2383	1183
MA1132.2	JUN::JUNB	1744	4169	6163	2654	1282	6923	8619	7797	4761	8206	1920	2128	2083	6622	6040	2666	2089	1645	17342	8979	2577	1789	1818	1519	2424	1451	1920	2462	3192	2526	1715	6848	2475	1619	2530	1471	1273	1616	1634	1498	1651	2094	1975	1771	2478	1070	2871	1514
MA1133.2	JUN::JUNB	2075	3334	11829	3127	1078	3851	5149	4527	3279	4714	1225	1335	1398	4169	3879	2186	1361	1102	11830	5464	1660	1083	1166	844	1603	921	1125	1550	1809	1487	1117	4248	1473	899	2214	1125	745	1053	986	935	1122	1348	1310	1208	1622	656	1768	804
MA1134.2	FOS::JUNB	2456	4404	6064	4442	1986	9189	11532	10567	6704	11184	2836	3144	3160	9472	8121	3676	3215	2158	21139	11877	3764	2632	2638	2227	3530	2187	2869	3662	4681	3662	2433	10263	3307	2428	3799	2019	1920	2266	2564	2110	2385	3215	2975	2597	3579	1567	4227	2304
MA1135.2	FOSB::JUNB	2323	4108	5712	4349	1829	8610	10756	9910	6195	10541	2575	2886	2915	8880	7586	3422	2992	2003	19733	11125	3503	2431	2478	2050	3299	2032	2680	3401	4333	3421	2313	9605	3082	2279	3547	1907	1790	2105	2368	1975	2266	2996	2793	2427	3313	1465	3977	2136
MA1136.1	FOSB::JUNB	2329	3781	11341	4110	1147	3755	5121	4390	3061	4602	1352	1441	1493	4419	3774	2222	1418	1097	12114	5320	1548	975	1030	785	1555	849	1081	1472	1622	1314	1028	3772	1325	843	2186	1018	675	949	902	859	1020	1206	1190	1126	1499	596	1645	733
MA1137.2	FOSL1::JUNB	2198	4015	5420	4131	1821	8267	10293	9633	6074	9965	2503	2881	2846	8504	7391	4344	2901	1935	18839	10700	3345	2370	2374	1979	3198	1969	2566	3284	4094	3222	2216	9064	2930	2167	3337	1818	1746	2024	2246	1903	2162	2818	2657	2318	3178	1443	3788	2048
MA1138.2	FOSL2::JUNB	2484	4363	6415	4845	2284	9173	11483	10521	6988	11107	3065	3418	3384	9557	8250	3759	3457	2266	20870	11894	3916	2799	2758	2342	3679	2304	3000	3811	4791	3738	2581	10513	3415	2508	3863	2103	2013	2320	2656	2219	2521	3302	3088	2707	3731	1659	4417	2373
MA1139.2	FOSL2::JUNB	2618	4650	12339	4792	1430	4554	6104	5400	3778	5497	1621	1811	1842	5216	4438	2528	1783	1399	13465	6428	1810	1238	1334	1014	1927	1144	1407	1844	2147	1709	1345	4972	1732	1088	2565	1298	835	1276	1174	1113	1365	1584	1549	1466	1887	741	2093	979
MA1140.3	JUNB	1556	2173	10956	2300	619	2292	3322	2791	1971	2992	716	796	963	2709	2397	1402	837	651	7737	3369	965	745	654	520	962	539	642	951	924	795	601	2115	826	481	845	648	462	618	466	539	601	691	719	677	918	377	896	365
MA1141.2	FOS::JUND	2223	3720	5846	4200	1941	8168	10384	9288	5970	9829	2624	2805	2888	8608	7255	3247	2881	1966	18025	10653	3317	2351	2367	2014	3134	1911	2527	3292	3980	3094	2231	8675	2966	2071	3188	1825	1662	2031	2199	1864	2135	2710	2559	2265	3203	1407	3669	1935
MA1142.2	FOSL1::JUND	1878	3565	5274	3102	1657	7438	9397	8537	5376	8996	2208	2529	2573	7784	6560	4340	2597	1720	16327	9799	2887	2063	2109	1803	2770	1687	2283	2938	3589	2759	1966	7792	2531	1877	2813	1564	1556	1748	1937	1643	1846	2398	2292	1998	2824	1291	3239	1790
MA1143.2	FOSL1::JUND	1612	2055	9740	2818	868	3319	4318	3690	2815	3840	1192	1313	1460	3882	3185	1602	1344	931	7893	4439	1271	1025	1142	879	1493	875	1226	1430	1513	1231	958	3484	1384	857	1375	951	749	928	865	829	916	1029	1090	1005	1394	669	1544	697
MA1144.2	FOSL2::JUND	2483	4334	6138	4458	2101	8894	11248	10293	6652	10889	2873	3158	3209	9303	8047	3595	3279	2155	20573	11521	3727	2637	2605	2214	3482	2198	2855	3637	4656	3619	2428	10126	3303	2394	3726	2032	1917	2242	2517	2114	2398	3182	2983	2602	3561	1560	4224	2283
MA1145.2	FOSL2::JUND	2717	4653	12276	4813	1499	4956	6688	5777	4109	6256	1705	1820	1894	5789	4784	2814	1794	1503	14431	6960	1946	1299	1477	1105	2000	1199	1423	1983	2374	1891	1463	5415	1814	1202	2815	1394	896	1329	1284	1219	1482	1722	1670	1519	2028	752	2314	1075
MA1146.2	NR1H4::RXRA	1531	3267	8796	5779	1578	6837	8579	7748	5288	8534	1509	1929	1747	6748	5683	2909	1881	1542	23954	8923	2536	1511	1526	1286	2001	1343	1766	2362	3063	2022	1415	6638	1721	1426	2192	1057	1060	1173	1448	1130	1299	1890	1711	1415	2009	878	2691	1316
MA1147.2	NR4A2::RXRA	1535	3474	8883	5769	1461	6329	8252	7295	5142	8111	1397	2013	1756	6293	5268	2977	1822	1383	24946	8177	2521	1349	1355	1087	1808	1151	1593	2043	2393	1833	1232	5761	1552	1194	1968	922	933	972	1269	969	1170	1724	1493	1245	1769	747	2435	1134
MA1148.2	PPARA::RXRA	1735	4759	9220	5387	1964	8094	10313	9579	6905	9845	2322	2923	2724	8583	7304	4131	2711	2004	22894	10876	3368	1922	2165	1758	2708	1581	2297	2844	3562	2716	1746	8894	2264	1887	2963	1328	1400	1499	1801	1413	1621	2487	2310	1951	2659	1144	3350	1609
MA1149.2	RARA::RXRG	1554	2925	9944	5090	1278	6511	8232	7689	6086	8311	1480	1809	1675	7155	6203	3377	1679	1555	26706	8707	2943	1991	1577	1327	2106	1233	1727	2526	3115	2161	1404	7283	1902	1524	2432	1087	1125	1234	1462	1241	1357	2058	1903	1550	2151	877	2953	1449
MA1150.2	RORB	2336	5295	10222	6462	2545	8954	12050	10891	8267	11357	2981	3505	3491	9059	8251	3709	3391	2469	25486	12165	3788	2160	2355	1993	3014	1829	2529	3186	3784	2939	2200	8769	2610	2060	3135	1618	1612	1742	1944	1656	2020	2641	2491	2176	2992	1343	3921	1748
MA1151.2	RORC	1857	4506	9200	6149	2466	8438	11392	10261	8001	10681	3143	3526	3518	8705	7928	3812	3438	2384	23929	11506	3715	2007	2193	1886	2772	1768	2317	2995	3411	2720	2023	8182	2407	1892	2877	1468	1569	1661	1776	1577	1827	2434	2289	2001	2775	1276	3610	1657
MA1152.2	SOX15	0	0	0	0	0	0	0	0	0	0	0	0	0	0	0	0	0	0	0	0	0	0	0	0	0	0	0	0	0	0	0	0	0	0	0	0	0	0	0	0	0	0	0	0	0	0	0	0
MA1153.2	Smad4	1201	2374	4881	2472	1566	6124	8588	7343	5228	7859	1547	1684	1746	10704	5109	2297	1903	1667	12337	8335	2151	1294	1493	1364	1882	1223	1649	1972	2203	1688	1143	5015	1404	1169	1735	882	1046	1107	1182	1056	1062	1534	1402	1314	1979	939	2179	995
MA1154.2	ZNF282	1840	4284	8628	6157	2080	8328	10952	9848	6579	10595	2695	3087	3139	9442	7027	4622	3127	2246	25494	11182	3477	2215	2439	2023	3168	1944	2527	3416	4387	3319	2084	10223	2586	2227	3455	1676	1694	1795	2303	1746	1928	2940	2817	2367	3003	1341	4111	2119
MA1155.1	ZSCAN4	5701	19926	25926	11976	4079	15122	22078	23175	14401	21856	5945	6321	8256	19928	13502	12052	8645	4716	59986	23763	8185	3617	3935	3646	4810	3117	4374	5230	6938	4968	3535	19816	4459	3496	5233	2893	2897	2932	3517	2961	3199	5046	4141	3512	4976	2561	6346	3105
MA1418.2	IRF3	3464	8002	15109	7752	3015	10520	13181	11797	9547	13512	5159	5271	6292	11586	10075	6271	6278	3982	35795	13637	5521	4082	5127	3468	5406	3334	5341	6170	8273	5876	4754	23691	5836	4503	6129	3276	3441	3599	3760	3233	3911	5448	4618	4313	5397	2529	7776	3588
MA1419.2	IRF4	2141	4980	8196	4481	1515	5901	7542	6582	4924	7106	2198	2324	2441	6181	5021	2974	2491	1861	22134	7378	2699	2209	2205	1766	2844	1740	2178	2924	3664	2684	2009	8526	2270	1900	2869	1524	1326	1657	1808	1556	1763	2456	2341	2146	2678	1220	3459	1680
MA1420.1	IRF5	1407	3328	8448	3625	1153	4816	6331	5401	4119	5689	1583	1646	1865	4812	4096	2533	1875	1366	20181	6162	2099	1630	1669	1298	2338	1390	1809	2377	2961	2244	1405	6626	1744	1484	2270	1093	1003	1217	1462	1171	1313	1958	1891	1763	2207	860	2654	1351
MA1421.1	TCF7L1	3844	7837	10215	7656	3836	12748	15357	14544	10956	15748	4482	4822	5204	14146	11652	7118	5218	4282	31745	16517	5739	3993	4332	3884	5559	3445	4668	6058	7274	5621	3806	16751	4766	3880	5782	3079	3168	3412	3917	3236	3697	5122	4765	4074	5309	2453	6756	3499
MA1463.2	ARGFX	3932	5162	9248	8027	2359	9079	11917	10886	9000	11307	3416	4090	3975	9427	9136	3780	3756	2525	20531	12010	3706	2402	3237	2541	3781	2297	3550	4361	5540	3861	2848	12207	3044	2948	4230	2010	2242	2274	3065	2178	2522	3656	3353	2536	3638	1646	5442	2692
MA1464.2	ARNT2	1502	2097	11090	2530	505	4321	5506	4977	4193	4856	1591	1818	1651	5576	3603	2787	1637	860	16082	5553	1787	1006	1656	1141	2015	1049	1715	2285	1957	1902	1235	4794	2017	1088	2061	1142	1464	1348	1042	1415	1358	1568	1482	1217	1749	971	1823	938
MA1466.2	ATF6	1112	1781	6393	1669	829	2910	4113	3452	2371	3649	901	837	1072	3176	2689	1858	996	742	10166	4033	1284	785	944	658	1227	680	1029	1272	1441	1030	793	3104	1061	656	1092	655	656	837	653	760	841	865	921	796	1124	533	1231	577
MA1467.3	Atoh1	2548	7652	7954	4780	2632	9565	11804	10564	8477	11853	3323	3599	3388	10582	8123	5614	3277	3739	30743	12194	4863	2718	2896	2363	3475	2313	3047	4071	5073	3733	2890	10627	3651	2590	3784	2282	1969	2489	2480	2562	2725	3501	3082	2795	3556	1549	4506	2335
MA1468.1	ATOH7	2629	4805	10026	6068	2360	9007	11008	10027	8343	11157	3039	3147	3097	9987	7666	4888	2961	2735	29377	11504	3991	2702	2808	2372	3487	2168	3027	3656	4366	3416	2459	9755	2998	2247	3423	1929	1997	2172	2328	2175	2278	2952	2798	2818	3614	1534	4116	2074
MA1470.2	BACH2	1124	1797	4727	1685	757	2340	3113	2746	1889	2932	818	932	955	2725	2105	1065	905	621	7377	3281	986	814	780	617	999	596	834	1159	1151	909	757	2829	917	615	908	648	561	699	601	639	710	778	772	807	1043	458	1178	490
MA1471.2	BARX2	3510	6482	12872	11205	2794	8934	11670	10447	7788	11085	4053	4449	4766	10357	8244	4144	4696	2765	21246	12110	3843	2853	3340	2744	4054	2692	3698	4484	5331	3939	2903	12055	3560	2837	3958	2378	2147	2502	2917	2108	2821	3588	3369	2902	4127	1742	5295	2612
MA1472.3	Bhlha15	4664	11862	20192	11614	5370	30768	36910	33136	30416	37298	7294	9964	7536	35340	27170	13058	7866	9244	92742	37862	12684	9136	9926	7778	12596	7412	10586	12842	18636	14396	8818	43600	11474	10278	12884	6978	5882	7546	9966	8414	8524	13756	11714	8676	11844	4976	17968	9404
MA1473.2	CDX4	4112	7514	19439	13232	3655	10502	13177	11982	9603	12961	4987	5809	5548	10714	10129	5475	5609	3734	30257	13862	4868	3502	4092	3133	5012	3002	4409	5339	6627	4983	3428	14853	4093	3692	5096	2503	2737	2896	3412	2619	3143	4555	4212	3498	4713	2021	6293	3170
MA1474.2	CREB3L4	1148	3254	7869	1962	646	3559	5433	4557	2989	4453	1310	985	1246	4572	3406	2206	1223	811	13532	5210	1612	877	1234	849	1507	814	1343	1744	1771	1367	975	3700	1498	848	1460	806	933	1022	787	949	1052	1109	1143	946	1352	676	1497	673
MA1475.2	CREB3L4	1650	1872	9255	2496	471	2278	3253	2679	1638	2835	629	650	752	2636	2186	1454	765	612	7248	3217	785	546	641	470	903	484	658	907	851	773	553	2021	831	417	1102	659	482	636	435	522	572	674	665	553	798	378	849	331
MA1476.3	Dlx5	1853	3241	6912	5999	1799	6318	8703	7462	6061	7719	2506	3106	2954	6806	5566	3065	2924	1869	14346	8725	2801	2114	2398	1896	2967	1813	2528	3303	3846	2845	2039	8788	2502	2064	2907	1709	1646	1814	1996	1739	2069	2642	2463	2085	2852	1307	3718	1909
MA1478.2	DMRTA2	0	0	0	0	0	0	0	0	0	0	0	0	0	0	0	0	0	0	0	0	0	0	0	0	0	0	0	0	0	0	0	0	0	0	0	0	0	0	0	0	0	0	0	0	0	0	0	0
MA1479.2	DMRTC2	2963	5678	12068	8259	2747	9351	12531	10970	8157	11633	3772	3824	4162	10879	8061	4186	4098	2952	19350	12351	4114	2800	2934	2553	3878	2440	3225	3879	4804	3775	2649	11080	3239	2590	3826	2082	1964	2309	2587	2086	2549	3143	3101	2783	3778	1531	4667	2171
MA1480.2	DPRX	1846	2955	6893	3570	2929	6580	8904	7558	5575	8194	2224	2707	2489	7497	5831	2923	2554	1900	18643	8663	2692	2236	2021	1687	2582	1705	2062	2882	3716	2799	1890	8419	2338	1963	2919	1545	1611	1618	1863	1483	1785	2562	2390	2265	2660	1148	3633	1728
MA1481.2	DRGX	0	0	0	0	0	0	0	0	0	0	0	0	0	0	0	0	0	0	0	0	0	0	0	0	0	0	0	0	0	0	0	0	0	0	0	0	0	0	0	0	0	0	0	0	0	0	0	0
MA1483.3	ELF2	1994	3356	7502	4269	1387	5476	8207	6672	4323	6765	2052	2152	2537	7589	4932	4853	2279	1856	21627	7839	2728	1307	1178	1128	1438	866	1271	1545	2656	1669	1155	4546	1446	1021	1641	964	934	1024	1009	977	1084	1427	1365	1271	1585	880	1878	845
MA1484.2	ETS2	1911	2569	7946	2728	1141	4641	6972	5620	3639	5633	3056	1914	2359	5727	3986	4582	1997	1726	20883	6401	2260	1116	952	1048	1287	717	1067	1436	2392	1449	997	3658	1300	880	1423	806	831	902	815	912	870	1180	1159	1045	1296	728	1587	761
MA1485.1	FERD3L	2725	5929	13208	6043	2200	13955	16739	15083	13075	17054	3232	3670	3130	15291	11092	5937	3092	3475	51907	17572	5445	3530	4038	3080	4962	2864	4191	5356	8320	5646	3386	18268	4575	4043	5224	2645	2801	2987	3864	3216	3360	5404	4752	3389	4816	1964	7323	3479
MA1487.3	FOXE1	7513	17774	23215	17442	5499	20457	25375	24219	15157	25287	7762	8644	8820	21829	18414	9957	8840	5670	58722	27322	8478	6098	8368	5672	8370	5385	8899	8941	11317	7967	6817	26462	7626	5901	8753	5124	4680	5295	6072	4818	6105	7403	7262	5982	8086	3488	11218	5177
MA1489.1	FOXN3	794	1805	2597	1789	751	3150	3892	3723	1692	3965	778	829	1186	2721	1928	1089	914	672	6766	4243	843	641	777	590	918	617	817	1005	1141	889	685	2581	829	712	1008	521	431	554	622	546	645	832	830	699	945	422	1188	693
MA1491.3	GLI3	1697	5312	9554	3952	1520	6906	9690	8294	6838	8659	2281	2280	2248	8770	6412	4027	2378	1910	33216	9419	3238	1894	1686	1207	2190	1288	1800	2803	2854	2284	1380	6653	1965	1499	2470	1169	1150	1291	1455	1267	1314	2003	1837	1664	2275	774	2733	1364
MA1493.1	HES6	1333	2306	6724	3005	704	4233	6121	5353	4698	5220	1169	1064	1017	5715	3714	2621	1042	1123	17256	5799	1965	1142	1555	1138	2053	1054	1674	2220	2107	1822	1150	5011	1750	1124	1872	987	1234	1178	1111	1201	1197	1535	1487	1246	1723	845	2018	979
MA1494.2	HNF4A	1917	5014	8453	5315	2027	8019	9823	9053	6292	9776	2339	3109	2615	8651	6810	4481	2693	2380	22710	10272	3445	2013	2098	1789	2660	1654	2244	2964	3844	2747	1797	8477	2343	1911	2998	1374	1458	1588	1893	1577	1672	2504	2339	1944	2658	1205	3419	1680
MA1495.2	HOXA1	0	0	0	0	0	0	0	0	0	0	0	0	0	0	0	0	0	0	0	0	0	0	0	0	0	0	0	0	0	0	0	0	0	0	0	0	0	0	0	0	0	0	0	0	0	0	0	0
MA1496.2	HOXA4	2340	3914	7083	4493	1293	5591	7106	6278	4824	6734	1987	2352	2489	6103	4774	2241	2536	1394	12578	7128	2103	2169	2009	1659	2535	1582	2214	2686	3135	2386	1793	6660	2170	1693	2521	1370	1380	1472	1732	1442	1570	2193	2024	1835	2506	1100	2978	1504
MA1497.2	HOXA6	2763	4491	8029	10890	2879	7582	9621	8324	6557	9037	2501	2943	2977	8134	6351	2864	3002	1805	14240	9866	2511	2405	2898	2266	3498	2145	3105	3804	4535	3434	2546	9991	3036	2361	3446	1931	1809	2204	2490	2027	2379	3053	2979	2397	3248	1510	4392	2213
MA1498.3	HOXA7	0	0	0	0	0	0	0	0	0	0	0	0	0	0	0	0	0	0	0	0	0	0	0	0	0	0	0	0	0	0	0	0	0	0	0	0	0	0	0	0	0	0	0	0	0	0	0	0
MA1499.2	HOXB4	0	0	0	0	0	0	0	0	0	0	0	0	0	0	0	0	0	0	0	0	0	0	0	0	0	0	0	0	0	0	0	0	0	0	0	0	0	0	0	0	0	0	0	0	0	0	0	0
MA1500.2	HOXB6	2140	3254	7406	6406	1947	6556	8936	7903	6237	8062	2615	3361	3058	7048	5807	3136	3075	2114	15196	9048	2942	2245	2595	1981	3155	1848	2614	3420	4034	3020	2128	9278	2624	2174	3014	1780	1723	1868	2123	1840	2207	2768	2601	2122	2986	1367	3944	1992
MA1501.2	HOXB7	2763	4491	8029	10890	2879	7582	9621	8324	6557	9037	2501	2943	2977	8134	6351	2864	3002	1805	14240	9866	2511	2405	2898	2266	3498	2145	3105	3804	4535	3434	2546	9991	3036	2361	3446	1931	1809	2204	2490	2027	2379	3053	2979	2397	3248	1510	4392	2213
MA1502.2	HOXB8	2140	3254	7406	6406	1947	6556	8936	7903	6237	8062	2615	3361	3058	7048	5807	3136	3075	2114	15196	9048	2942	2245	2595	1981	3155	1848	2614	3420	4034	3020	2128	9278	2624	2174	3014	1780	1723	1868	2123	1840	2207	2768	2601	2122	2986	1367	3944	1992
MA1503.2	HOXB9	1867	3454	5866	3805	1378	4321	5018	4438	3926	5363	2684	2852	3051	4765	3637	1887	3005	1290	9725	5089	1601	1394	1576	1283	2013	1255	1770	2196	2525	1915	1354	5732	1750	1480	2036	1070	1212	1327	1337	1100	1336	1706	1728	1441	1999	915	2473	1275
MA1504.2	HOXC4	0	0	0	0	0	0	0	0	0	0	0	0	0	0	0	0	0	0	0	0	0	0	0	0	0	0	0	0	0	0	0	0	0	0	0	0	0	0	0	0	0	0	0	0	0	0	0	0
MA1505.2	HOXC8	0	0	0	0	0	0	0	0	0	0	0	0	0	0	0	0	0	0	0	0	0	0	0	0	0	0	0	0	0	0	0	0	0	0	0	0	0	0	0	0	0	0	0	0	0	0	0	0
MA1506.2	HOXD10	1715	3295	5787	3811	1263	3708	4639	4117	3800	4346	2837	3076	3348	4431	3484	1788	3272	1209	9565	4781	1526	1265	1491	1194	1867	1156	1671	2031	2277	1750	1235	5267	1603	1343	1884	983	1090	1219	1212	998	1217	1562	1559	1326	1800	836	2270	1156
MA1507.2	HOXD4	0	0	0	0	0	0	0	0	0	0	0	0	0	0	0	0	0	0	0	0	0	0	0	0	0	0	0	0	0	0	0	0	0	0	0	0	0	0	0	0	0	0	0	0	0	0	0	0
MA1508.2	IKZF1	5139	11995	20332	12967	5585	21524	26892	24304	18469	27228	7524	8092	8221	24415	19410	11084	8439	6850	53372	27686	10969	7634	7751	6587	9793	5975	8355	11241	14456	10814	6879	32267	8922	7502	11022	5496	5960	6148	7627	5980	6632	10015	9343	7547	9377	4451	13699	6980
MA1509.1	IRF6	698	1447	6449	2114	675	2066	2790	2247	1668	2512	831	927	1058	2123	1628	1188	1083	518	8860	2603	961	648	606	565	1019	510	700	977	882	726	487	2044	635	425	775	390	435	494	469	443	459	629	674	677	795	444	841	400
MA1511.2	KLF10	1918	8156	13760	7313	2665	14344	22075	18121	11805	18058	4925	6183	6288	17783	11882	8606	6134	3379	72041	21013	5720	2458	2106	1657	3099	1945	2455	3621	5055	3681	1748	9527	2583	2248	3659	1461	1261	1663	2133	1671	1617	3115	3001	2171	3288	1107	4169	1972
MA1512.2	KLF11	2376	6035	11667	6455	1908	10711	15779	13350	8489	13264	3824	4571	5051	12826	9566	6371	4907	2445	56811	15512	4142	1977	1743	1306	2420	1543	2060	2808	3897	2855	1473	7890	2089	1781	2794	1284	936	1364	1720	1287	1375	2503	2396	1721	2564	864	3389	1566
MA1513.2	KLF15	747	1830	6194	2020	830	3778	7121	4993	2409	4733	1226	1831	1965	5423	3237	3023	1790	1108	22837	5983	1925	738	782	984	1449	448	951	994	2233	1413	630	2558	1075	457	1052	404	1307	681	655	739	730	828	1001	760	1177	369	1739	425
MA1514.2	KLF17	2347	8622	12349	5789	2310	11671	16280	14242	10334	14561	3442	3915	3705	13747	10200	6060	3827	2452	54348	16466	4885	3418	2738	1954	3834	2134	2965	4356	5036	3853	2307	11090	3066	2481	4092	1874	1700	2040	2381	2088	2145	3539	3194	2776	3499	1324	4498	2255
MA1515.2	KLF2	1829	4712	9736	4997	1558	8632	13457	11022	7555	10950	3335	3954	4439	11273	7454	5952	4321	2077	49938	12808	3912	1528	1365	971	2022	1129	1606	2200	3557	2426	1084	6016	1593	1369	2299	903	790	1101	1327	1087	1044	1990	1932	1276	1890	643	2803	1196
MA1516.2	KLF3	1458	2588	8429	4669	1265	6125	9099	7668	5467	7847	3107	3539	4082	8063	5839	3707	3989	1673	31758	8807	2751	1049	1401	920	1776	960	1461	1687	3265	2144	1068	5680	1697	1217	1892	865	870	1119	1248	1167	1057	1950	1685	1133	1628	608	2676	1128
MA1517.2	KLF6	2220	5559	10990	5037	1450	8881	12442	10834	7550	10557	3232	3865	4466	11470	7631	5343	4307	2169	49080	12546	3711	1963	1603	1081	2177	1385	1769	2534	3516	2529	1299	7466	1817	1661	2487	1109	866	1204	1557	1189	1135	2305	2168	1580	2181	775	3297	1487
MA1518.3	Lhx1	1898	3858	6194	5588	1558	6334	9868	7070	6762	7234	1866	2192	2266	7858	5340	2346	2160	1708	12540	8352	2276	1678	2152	1748	2618	1494	2314	3040	3402	2572	1796	7438	2162	1936	2582	1454	1432	1642	1792	1590	1712	2298	2186	1696	2522	1150	3290	1668
MA1519.2	LHX5	2763	4491	8029	10890	2879	7582	9621	8324	6557	9037	2501	2943	2977	8134	6351	2864	3002	1805	14240	9866	2511	2405	2898	2266	3498	2145	3105	3804	4535	3434	2546	9991	3036	2361	3446	1931	1809	2204	2490	2027	2379	3053	2979	2397	3248	1510	4392	2213
MA1520.2	MAF	2877	5784	12082	6786	2212	13241	15771	15098	11236	16269	3333	3607	3310	14209	9876	5779	3487	3496	35820	17854	5294	4137	4337	3540	5309	3143	4513	5352	7525	5501	4075	17368	5195	3871	5445	3337	2942	3451	3759	3757	3900	5076	4611	3978	5248	2325	6866	3465
MA1521.2	MAFA	2585	5229	14213	6074	2047	12817	15589	14740	10904	15837	3151	3388	3159	13432	9514	5744	3233	3294	37854	17546	5019	4262	4189	3334	5121	2927	4302	5195	7301	5342	3701	16612	4865	3644	5212	3129	2949	3210	3640	3567	3559	4841	4532	3797	4988	2174	6654	3274
MA1522.2	MAZ	1805	6386	15073	5890	2605	12664	19220	15671	9926	16124	3348	4631	3965	16000	10443	7424	4072	3006	63671	18104	5669	2662	2785	2411	4006	2089	3069	4300	5162	3825	2137	9956	3024	2259	3978	1736	2095	2044	2198	2003	1993	3227	3213	2492	3738	1456	4353	2053
MA1523.2	MSANTD3	2401	3549	9427	8782	1188	7724	9853	8536	5323	9363	1667	1625	1739	7566	5835	3326	1913	1992	23544	9521	2594	1926	1757	1409	2349	1473	1896	2375	3878	2646	1800	8530	2316	1978	2773	1435	1213	1579	1868	1590	1545	2629	2324	1766	2393	908	3358	1784
MA1524.3	Msgn1	3858	7242	13321	8821	3671	12491	16396	14112	10824	15682	5116	5940	5720	14501	10579	7434	5526	4109	38103	16265	5973	3386	3806	3084	4842	2996	4096	5051	6382	4766	3509	14100	4258	3217	5007	2721	2583	2993	3227	3063	3353	4296	4049	3586	4625	1986	5948	2917
MA1525.3	NFATC4	3438	7287	14576	8345	3474	12129	15343	14279	10515	14857	4916	4789	5135	14564	10762	6133	5037	3897	31366	16301	5556	3823	4277	3582	5430	3360	4625	5974	7707	5594	3712	16538	4828	4014	5764	3010	3015	3445	3900	3164	3643	5111	4880	3922	5284	2404	7028	3555
MA1527.2	NFIC	3039	5482	16103	8465	3064	13493	17206	15579	14133	17315	4074	4377	3759	16458	11398	6828	3863	3569	47697	18239	6721	3299	3475	2783	4436	2678	3645	4674	6242	4607	2915	14595	3798	3242	4729	2463	2430	2716	3024	2683	2826	4743	3963	3149	4126	1752	6110	3060
MA1528.2	NFIX	2918	5891	16063	6831	2929	13706	17682	16076	13581	17406	3131	3606	3183	16468	11505	6174	3108	3244	48639	18797	6386	2968	3182	2507	3914	2305	3328	4225	5696	4214	2509	12550	3384	2764	4127	2203	2108	2454	2717	2375	2537	4103	3514	2658	3619	1513	5105	2590
MA1529.2	NHLH2	2352	4600	13228	4541	1889	13838	16529	15017	12957	16941	2942	3399	2999	16254	11578	5446	3213	3443	46680	17086	6084	3690	4260	3277	5310	2902	4546	5437	8999	6338	3800	21702	4902	4680	5462	2963	2958	3150	4312	3566	3647	6114	5139	3466	5115	1944	8530	4054
MA1530.2	NKX6-3	2489	4178	7671	6144	1774	7978	10037	9332	6577	9608	2559	3461	3232	8521	7251	3528	3196	1955	17894	10797	2958	2501	2486	2056	3148	1956	2723	3359	4362	3177	2298	9381	2733	2352	3248	1691	1755	1884	2269	1757	2010	2885	2700	2287	3048	1346	4082	2169
MA1531.2	NR1D1	2047	6146	10336	6268	1456	8041	10712	9255	8231	10212	2029	2018	1971	9180	6701	3960	2040	2053	24860	10715	3302	2141	1920	1525	2532	1581	2150	2822	3716	2552	1751	8251	2355	1816	2818	1379	1297	1556	1746	1546	1657	2518	2229	2015	2459	1008	3394	1747
MA1532.2	NR1D2	1828	5758	9266	8809	1489	7566	10021	8599	7153	9471	1851	1885	1912	8233	6258	3310	1859	1883	21161	9954	2837	1764	1811	1361	2347	1494	1970	2593	3426	2416	1696	7628	2093	1678	2535	1285	1155	1410	1675	1393	1534	2364	2027	1753	2311	966	3071	1563
MA1533.2	NR1I2	1728	3937	7397	4346	1396	6540	9439	7933	5193	8538	1426	1846	1670	7206	5636	3061	1612	1701	22740	9215	2628	1741	1507	1179	1993	1171	1537	2256	2508	1879	1311	5843	1855	1260	1999	1101	1193	1260	1218	1122	1294	1843	1611	1595	1986	745	2366	1208
MA1534.2	NR1I3	2527	5685	7023	5491	2467	8979	10785	9715	7233	10759	3378	3490	3539	9163	7894	4105	3600	2788	19153	11474	3854	2663	2968	2533	3775	2324	3096	3732	4738	3558	2538	10291	3179	2566	3722	2078	2039	2158	2579	2097	2556	3186	2999	2690	3576	1771	4411	2264
MA1535.2	NR2C1	0	0	0	0	0	0	0	0	0	0	0	0	0	0	0	0	0	0	0	0	0	0	0	0	0	0	0	0	0	0	0	0	0	0	0	0	0	0	0	0	0	0	0	0	0	0	0	0
MA1536.2	NR2C2	0	0	0	0	0	0	0	0	0	0	0	0	0	0	0	0	0	0	0	0	0	0	0	0	0	0	0	0	0	0	0	0	0	0	0	0	0	0	0	0	0	0	0	0	0	0	0	0
MA1537.2	NR2F1	1938	6222	10004	5186	1920	8984	11557	10447	8085	11216	2293	3082	2593	9822	8484	5557	2550	2256	28763	12023	3653	2063	2269	1816	2848	1675	2472	3152	3903	2985	1819	9093	2411	2071	3141	1355	1544	1687	1975	1558	1696	2763	2574	2070	2900	1238	3737	1821
MA1538.1	NR2F1	1571	3367	9880	6813	1263	6669	8340	7909	5132	8638	1430	1849	1611	7392	5520	2925	1738	1422	24634	9145	2288	1595	1506	1250	2001	1342	1808	2440	3244	2146	1552	7045	1894	1504	2368	1126	1112	1189	1405	1201	1438	1991	1911	1503	2040	846	2920	1325
MA1539.1	NR2F6	1682	4434	11207	7270	1527	7990	9338	8792	5921	10521	1744	2243	2020	7868	6625	3410	2173	1474	26641	10145	2625	1699	1708	1378	2176	1475	1958	2608	3455	2343	1670	7554	2051	1559	2546	1323	1147	1372	1574	1252	1572	2241	1971	1671	2312	870	3257	1433
MA1540.3	Nr5a1	2734	6107	11151	5817	3536	11206	15022	13473	9806	13892	3438	4275	4144	11315	9142	5687	4233	3179	36510	15254	5291	4236	3338	2532	4123	2716	3633	4742	6053	4640	3016	13537	3847	3110	4946	2341	2191	2639	3083	2374	2855	4170	3803	3519	4505	1757	5561	2826
MA1541.2	NR6A1	2418	4404	8173	4773	1998	7338	9748	8615	6988	9183	2537	3376	2904	8015	7593	3908	2927	2486	24443	9874	3721	3078	2469	1977	3152	1999	2615	3605	4269	3218	2221	9576	2898	2175	3570	1846	1843	2035	2110	1793	2140	2933	2712	2941	3334	1313	3983	1985
MA1542.2	OSR1	1934	4297	6969	4970	1521	8461	10949	9821	8271	10539	2455	2483	2735	9443	6665	4145	2675	2663	24427	11607	3632	2666	2550	2235	3452	2086	2809	3513	3747	3036	2227	8286	2897	1993	3118	1709	1708	2008	2064	2044	2161	2574	2493	2442	3261	1616	3643	1751
MA1544.2	OVOL1	550	748	4259	2043	314	1225	1720	1450	888	1504	495	358	478	2273	1125	696	497	289	4456	1666	437	424	317	314	514	271	324	511	291	280	256	651	429	164	308	257	241	286	133	246	241	194	168	277	471	299	281	122
MA1545.2	OVOL2	348	560	2751	998	240	923	1296	1037	703	1154	280	260	316	1532	848	656	350	206	2972	1269	326	222	230	245	457	214	245	401	191	173	164	421	301	108	238	177	177	201	85	198	197	136	120	223	392	228	175	72
MA1546.2	PAX3	877	1446	3653	2185	538	2681	3619	3154	2136	3187	819	950	875	3052	2263	1388	810	725	7612	3396	1052	1060	801	690	1208	644	969	1215	1206	899	670	2847	870	600	975	541	527	659	588	620	684	772	803	850	1085	489	1194	558
MA1547.2	PITX2	1995	3663	7568	5544	1866	7839	9622	8757	5633	9497	2492	2706	3015	7969	6356	3038	2855	1954	18331	10205	2801	1966	2057	1882	2831	1689	2301	2960	3862	2855	1720	8690	2151	1961	3174	1366	1560	1570	1994	1452	1637	2719	2525	2072	2718	1194	3764	1829
MA1548.2	PLAGL2	1824	8939	16477	12220	2487	13158	18541	16064	12103	18411	1882	2790	2312	15551	11788	6139	2370	2042	62218	18861	5032	2334	1897	1696	2209	1436	2120	2404	2716	2548	1518	5588	2257	1456	2503	1266	1594	1616	1382	1315	1606	2040	1707	1669	2280	856	2520	1377
MA1549.2	POU6F1	2276	4292	6867	5092	1683	7050	8879	8120	6554	8599	2015	2653	2464	8350	6888	3102	2433	1969	14648	9333	2922	2424	2526	2095	3160	1854	2757	3324	4183	3176	2428	9237	2823	2269	3151	1851	1770	2041	2258	1988	2181	2887	2643	2384	3121	1375	3989	2044
MA1550.2	PPARD	2101	6172	9970	5626	2044	8803	11655	10279	7427	11019	2419	3279	2905	9562	7890	4814	2802	2233	27931	12153	3510	2293	2342	1876	3003	1767	2647	3210	4077	3100	1862	9571	2458	2107	3291	1436	1593	1647	2107	1636	1791	2927	2603	2145	2968	1330	3830	1899
MA1552.2	RARB	1272	2523	6940	2994	1026	5291	7343	6446	5096	7040	1563	1847	1762	6302	4342	2358	1790	1523	20961	7603	2844	1373	1398	1197	2150	1257	1522	2168	2640	1845	1274	5766	1648	1241	2075	997	1017	1093	1313	1046	1118	1683	1590	1316	2056	801	2323	1094
MA1553.2	RARG	1558	2889	6917	3262	1235	5963	8107	7161	5782	7756	1781	1985	1931	6425	4902	2627	1975	1651	22510	8320	3179	1730	1657	1333	2439	1469	1764	2479	3055	2179	1455	6768	1957	1415	2343	1148	1164	1265	1488	1237	1379	1973	1787	1559	2342	941	2783	1341
MA1554.2	RFX7	1661	4167	6510	6480	2118	5983	7908	7094	5287	7287	2707	2885	3102	7136	5831	3525	3088	2274	23320	8091	2945	1704	1679	1485	2450	1326	1870	2465	2449	1936	1542	5045	2078	1192	2011	1310	1210	1414	1121	1341	1565	1539	1567	1669	2269	1072	2269	1064
MA1555.1	RXRB	1296	2709	6330	3199	1345	5869	7839	7108	5544	7532	1517	1814	1684	6576	4713	2424	1665	1401	22801	8443	2629	1445	1361	1112	2043	1227	1464	2119	2555	1916	1271	5884	1672	1256	2061	943	980	1061	1306	1014	1118	1759	1648	1340	1967	788	2505	1149
MA1556.1	RXRG	1252	2594	6670	3280	1581	5911	7729	7261	5133	7777	1496	1860	1621	7802	4680	3019	1654	1362	21897	8714	2578	1459	1390	1197	2006	1159	1485	2259	2545	1889	1299	5817	1725	1244	2125	1022	1049	1098	1357	1059	1169	1779	1572	1382	1963	807	2412	1140
MA1557.1	SMAD5	909	1577	5160	1928	1145	4880	6777	5739	4772	6372	1057	1239	1265	18429	3756	1929	1247	1400	13140	6622	1796	933	1087	1043	1522	891	1141	1469	1590	1281	756	3614	1042	932	1227	676	764	721	853	728	747	1116	1022	913	1473	643	1462	751
MA1558.2	SNAI1	4323	10070	20365	8373	2906	16642	21414	19190	16108	20810	3870	4442	4502	18490	14210	8376	4620	5230	58393	21584	7759	4512	5034	3866	6377	3781	5378	6596	10258	7324	4334	22288	5613	5272	6969	3493	3188	3827	4940	3890	4082	6866	6025	4222	6171	2524	9121	4690
MA1559.2	SNAI3	3969	8476	18859	8012	2675	15225	19868	17704	15199	19075	3489	4040	3971	16938	13308	7579	4156	4926	55257	19932	7146	4359	4602	3491	5804	3444	4891	5916	9520	6640	3996	20186	5107	4689	6289	3248	2936	3516	4414	3548	3727	6076	5430	3900	5621	2321	8178	4106
MA1560.2	SOHLH2	1434	2000	12871	2168	403	4427	5577	5180	5455	5505	1276	1005	1250	5506	3731	1727	1091	988	19185	5598	2088	1108	1940	1416	2245	1121	1888	2386	2021	1962	1353	4976	2190	1069	2038	1267	1684	1419	1011	1494	1361	1563	1420	1130	1817	1102	1925	936
MA1561.2	SOX12	1676	2792	9834	3906	1505	4866	6629	5844	3851	6136	2363	2890	2626	4942	4597	2760	2688	1576	18964	6587	2450	1401	1546	1240	2035	1249	1738	2018	2485	1955	1411	5503	1789	1273	1958	1144	949	1361	1340	1265	1413	1748	1693	1430	1887	812	2233	1117
MA1562.2	SOX14	2164	3400	8520	5061	2003	5987	8131	7301	4896	7426	2532	2726	2611	6446	5402	3098	2609	1972	15434	8344	2924	1641	1846	1377	2173	1325	1928	2215	3081	2210	1490	6278	1939	1521	2301	1199	1038	1454	1553	1283	1579	2047	1857	1583	2134	911	2687	1394
[truncated: 359 more rows]
[truncated: 57 more columns]

## Sheet: Motifs in promoter G4s 
Motif_ID	Motif_Name	Erpetoichthys_calabaricus	Latimeria_chalumnae	Leptobrachium_leishanense	Xenopus_tropicalis	Anolis_carolinensis	Chelonoidis_abingdonii	Chelydra_serpentina	Chrysemys_picta_bellii	Crocodylus_porosus	Gopherus_evgoodei	Laticauda_laticaudata	Naja_naja	Notechis_scutatus	Pelodiscus_sinensis	Pelusios_castaneus	Podarcis_muralis	Pseudonaja_textlis	Salvator_merianae	Sphenodon_punctatus	Terrapene_carolina_triunguis	Varanus_komodoensis	Amazona_collaria	Anas_platyrhynchos	Apteryx_haastii	Aquila_chrysaetos	Athene_cunicularia	Cairina_moschata_domestica	Calidris_pugnax	Catharus_ustulatus	Corvus_moneduloides	Coturnix_japonica	Ficedula_albicollis	Gallus_gallus	Geospiza_fortis	Manacus_vitellinus	Meleagris_gallopavo	Nothoprocta_perdicaria	Numida_meleagris	Parus_major	Pavo_cristatus	Phasianus_colchicus	Serinus_canaria	Stachyris_ruficeps	Strigops_habroptila	Strix_occidentalis_caurina	Struthio_camelus_australis	Taeniopygia_guttata	Zonotrichia_albicollis
[truncated: 1,019 more rows]
[truncated: 57 more columns]

[truncated: 2 more sheets: Motifs in G4-free promoter, Promoter G4 associated file]
