# Supplementary material for: CGGBP1-regulated heterogeneous C–T transition rates relate with G-quadruplex potential of terrestrial vertebrate genomes
Source: bioRxiv preprint, doi:10.64898/2025.12.10.693595, version 2 (2026-03-24)
Supplement: Table S17 [file 693595_file45.xlsx]

## Sheet: Density in G4s Genomewide
Motif_ID	Motif_Name	Erpetoichthys_calabaricus	Latimeria_chalumnae	Leptobrachium_leishanense	Xenopus_tropicalis	Anolis_carolinensis	Chelonoidis_abingdonii	Chelydra_serpentina	Chrysemys_picta	Crocodylus_porosus	Gopherus_evgoodei	Laticauda_laticaudata	Naja_naja	Notechis_scutatus	Pelodiscus_sinensis	Pelusios_castaneus	Podarcis_muralis	Pseudonaja_textilis	Salvator_merianae	Sphenodon_punctatus	Terrapene_carolina	Varanus_komodoensis	Amazona_collaria	Anas_platyrhynchos	Apteryx_haastii	Aquila_chrysaetos	Athene_cunicularia	Cairina_moschata	Calidris_pugnax	Catharus_ustulatus	Corvus_moneduloides	Coturnix_japonica	Ficedula_albicollis	Gallus_gallus	Geospiza_fortis	Manacus_vitellinus	Meleagris_gallopavo	Nothoprocta_perdicaria	Numida_meleagris	Parus_major	Pavo_cristatus	Phasianus_colchicus	Serinus_canaria	Stachyris_ruficeps	Strigops_habroptila	Strix_occidentalis	Struthio_camelus	Taeniopygia_guttata	Zonotrichia_albicollis
MA0002.3	Runx1	5040.1	4529.35	3304.54	4256.93	2374.51	4797.35	3895.72	3624.51	8325.25	4360.12	2827.64	3118.95	1993.85	4590.09	5175.44	3479.49	2280.36	3018.3	4164.37	3400.33	3030.62	4031.43	4288.27	3065.81	3589.14	4900.25	3815.64	4365.4	4808.26	3991.09	5092.58	2146.7	4662.48	5522.26	4439.18	5664.63	2928.77	4821.82	4630.1	5157.38	5093.88	5135.22	5028.25	4568.32	4079.59	3800.13	4075.59	6095.97
MA0003.5	TFAP2A	31674.9	29283.1	38497.3	96649.4	31731.5	47312.8	41138.8	44245.3	38543.5	48038.4	19253	47216.5	21379.7	42424.6	43761.8	22510.6	22268.4	20531.3	33306.7	44698.6	40415.2	29242.4	48226.6	43184.8	41793.6	38276.2	49454.5	41526.2	43255	47906.5	23025	15536.2	28910.8	42336	45778.7	27301.6	44381.3	35000.8	44877.4	39130.5	28095.7	43952.8	46004.8	33647.1	43250.4	35295.3	41776	41705.9
MA0004.1	Arnt	0	0	0	0	0	0	0	0	0	0	0	0	0	0	0	0	0	0	0	0	0	0	0	0	0	0	0	0	0	0	0	0	0	0	0	0	0	0	0	0	0	0	0	0	0	0	0	0
MA0006.2	Ahr::Arnt	0	0	0	0	0	0	0	0	0	0	0	0	0	0	0	0	0	0	0	0	0	0	0	0	0	0	0	0	0	0	0	0	0	0	0	0	0	0	0	0	0	0	0	0	0	0	0	0
MA0007.4	Ar	1188.65	2072.64	2352.56	4193.89	1201.67	2795.58	2857.19	3230.06	2497.69	2915.82	1108.34	1046.29	1132.04	2693.02	2822.18	1838.88	1041.33	1779.42	2133.76	3145.18	2150.28	3155.34	5249.98	3498.93	4166.73	4843.75	4827.17	5006.52	4279.62	4586.19	3431.86	1959.2	3556.64	5018.67	4297.36	4221.84	4904.78	4824.03	4916.78	4377.07	4053.54	5026.21	4859.82	6340.08	4257.82	3027.79	4537.6	5011.13
MA0009.2	TBXT	1266.51	573.452	1532.5	920.204	637.765	597.614	532.843	561.094	988.571	532.707	797.836	763.546	676.788	707.357	579.036	563.063	637.14	613.97	805.973	536.641	752.771	668.086	991.924	752.48	843.555	856.185	859.479	1125.74	1320.52	2559.08	777.18	814.49	847.867	1395.88	893.82	1510.57	969.777	1407.38	1437.33	1068.87	1446.33	1252.13	1172.44	813.709	1046.91	721.969	1491.07	1379
MA0014.4	PAX5	5358.46	1492.57	3633.14	2262.42	2343.88	2945.12	5134.22	3265.51	2948.4	2840.5	3578.04	6237.91	5450.83	3219.44	3260.79	2557.58	4874.25	3246.39	4003.17	3138.79	4077.6	3121.85	5051.93	4694.52	4438.07	3257.41	5683.45	4120.57	4830.82	5730.73	4012.7	1602.71	5288.55	3643.85	3570.08	5935.75	6103.03	6828.88	4459.27	5619.09	6330.88	3747.56	5706.86	4499.76	4713.91	3218.08	5760.95	3200.28
MA0017.3	NR2F1	25079.4	9622.87	11080.4	6334.61	7667.6	11588	9873.02	11305.2	12269.4	12343	10860.6	21968.5	11841.4	9704.25	13267.7	7645.96	11751.8	8573.71	12025	10881	8274.73	6950.57	9304.95	6167.54	7378.42	9018.19	9527.89	9687.43	14727.8	12032.4	21507.4	4896.5	20477.8	10830.1	15798.6	25352.8	6438.44	15613.9	11157	10462.5	24101.3	11429.8	12038.4	9934.11	9252.4	7661.83	16415.3	10168.3
MA0018.5	CREB1	18367.9	750.256	1216.76	3888.32	1228.69	820.327	1015.9	719.317	850.673	874.383	1352.73	1393.81	1239.16	1096.43	663.169	1087.47	1205.03	812.378	790.99	677.19	637.844	828.497	862.688	606.774	659.531	723.628	1046.74	840.52	1209.85	1124.38	1214.86	410.231	1225.4	976.544	1943.77	3280.16	899.292	1316.65	1142.8	1200.46	1501.31	1322.84	1223.13	885.879	806.936	528.884	1387.15	1022.25
MA0019.2	Ddit3::Cebpa	1861.7	3103.66	5799.49	2808.77	3682.46	4120.72	3302.8	3753.04	3759.08	3684.93	4663.39	4859.04	4517.2	3195.06	2973.75	3530.05	4488.94	3157.34	3248.69	3429.07	3940.84	2672.35	2734.08	3317.3	2963.19	3005.34	2732.09	3423.92	2581.95	2512.06	3258.02	1354.3	3284.5	3553.85	2863.61	3689.27	3339.53	4731.09	2886.45	3541.37	3829.4	3522.17	2894.31	2814.6	2794.1	3559.48	2330.36	3475.66
MA0024.3	E2F1	1783.85	1025.72	1172.95	1999.76	1610.63	1822.54	1789.04	1608.38	882.312	1858.58	826.587	916.754	905.631	2123.95	1277.47	2365.26	891.492	1065.47	1185.02	1573.59	1715.86	1098.2	1018.78	1752.46	730.723	693.206	1168.38	850.616	586.661	815.413	1016.47	291.998	1025.62	853.997	451.464	953.787	2522.88	951.529	618.525	1179.69	1053.03	509.692	814.331	873.249	989.374	1116.53	790.719	694.715
MA0025.3	NFIL3	363.344	797.271	351.932	415.887	623.353	199.912	174.46	195.009	187.446	191.03	402.512	430.974	390.736	219.848	237.553	620.559	396.639	262.461	378.36	187.266	709.098	176.276	228.26	147.702	146.413	154.287	206.467	159.017	121.415	149.112	290.42	59.7134	184.045	342.748	153.524	208.187	179.858	201.37	194.394	226.241	207.223	241.588	202.765	153.36	127.706	221.068	175.088	327.538
MA0027.3	EN1	0	0	0	0	0	0	0	0	0	0	0	0	0	0	0	0	0	0	0	0	0	0	0	0	0	0	0	0	0	0	0	0	0	0	0	0	0	0	0	0	0	0	0	0	0	0	0	0
MA0028.3	ELK1	11075.1	1347.55	3111.67	1482.31	2147.5	1677.77	2012.46	1831.76	1364.06	1427.51	1985.25	1241.85	2090.01	1972.07	1871.35	1655.48	1716.25	1777.86	2069.01	1843.51	2501.96	1309.73	758.629	1157.66	804.601	441.131	992.322	949.055	1400.04	1109.61	2548.33	291.998	1618.65	476.783	1059.05	1476.68	979.499	1568.92	832.554	1992.31	2089.15	948.674	992.568	1109.6	846.23	917.852	917.234	509.041
MA0029.2	Mecom	593.462	1125.71	760.535	505.193	632.361	557.313	433.681	511.012	683.523	450.124	661.269	488.271	775.385	1442.84	466.446	494.663	599.365	587.412	1035.88	472.755	519.469	3581.93	1282.28	445.101	424.464	901.819	1242	1970.05	478.139	693.168	1010.33	246.616	1591.91	754.428	1377.81	7526.2	420.479	807.694	665.651	881.879	1638.76	655.528	634.459	4880.45	631.515	568.061	464.265	663.422
MA0030.2	FOXF2	808.007	919.775	1022.94	613.761	641.369	480.424	459.603	477.772	632.781	456.022	393.886	310.152	454.033	357.194	473.25	643.359	353.827	487.427	788.235	447.6	433.274	484.759	441.414	465.061	404.316	564.995	424.138	434.142	469.544	467.486	832.401	246.616	1086.97	631.881	444.959	738.338	610.06	378.399	498.747	507.888	737.968	549.465	712.948	539.466	515.036	601.641	476.691	592.49
MA0031.2	FOXD1	3581.53	821.109	781.013	467.544	556.694	509.589	420.925	395.78	549.803	473.719	317.697	257.837	371.26	337.975	398.397	582.889	289.609	490.551	656.834	356.563	360.87	408.961	318.892	413.165	326.408	465.034	318.503	354.634	279.362	318.374	496.986	132.564	1278.88	382.958	333.068	801.278	549.297	440.359	349.516	554.06	759.114	346.178	469.303	409.561	467.321	391.766	316.288	337.97
MA0032.2	FOXC1	352.962	510.545	575.759	1394.75	897.196	185.064	202.851	216.283	221.473	163.351	245.82	180.61	266.577	180.941	202.91	449.063	195.171	342.136	329.106	212.82	189.629	200.955	213.155	247.5	155.816	241.209	244.88	190.568	130.011	131.648	245.425	60.9076	383.821	214.457	175.642	196.083	184.719	183.667	166.904	170.835	179.734	188.556	284.525	164.185	147.353	271.438	132.163	183.588
MA0033.2	FOXL1	3581.53	821.109	781.013	467.544	556.694	509.589	420.925	395.78	549.803	473.719	317.697	257.837	371.26	337.975	398.397	582.889	289.609	490.551	656.834	356.563	360.87	408.961	318.892	413.165	326.408	465.034	318.503	354.634	279.362	318.374	496.986	132.564	1278.88	382.958	333.068	801.278	549.297	440.359	349.516	554.06	759.114	346.178	469.303	409.561	467.321	391.766	316.288	337.97
MA0035.5	GATA1	468.887	548.951	1212.95	801.129	2039.41	578.524	483.879	475.999	467.422	461.014	738.896	641.478	693.83	497.353	2008.69	652.281	682.47	542.106	833.872	438.017	809.085	211.531	290.36	331.331	306.259	275.978	270.488	316.772	177.288	284.79	349.731	99.7213	303.596	277.645	283.628	367.959	260.065	272.182	233.665	223.933	268.544	288.727	264.903	216.508	213.312	464.523	229.309	250.348
MA0036.4	GATA2	617.684	801.906	1284.86	963.106	857.56	829.341	680.146	699.816	924.696	742.795	970.341	691.302	938.496	644.544	576.561	921.917	934.304	668.65	1280.77	663.615	526.365	599.339	657.926	762.46	607.145	575.86	627.404	600.732	417.969	513.159	930.571	192.277	486.068	693.155	411.131	641.507	549.297	666.071	555.691	574.837	600.524	705.613	518.359	588.18	541.7	724.768	611.113	636.301
MA0037.5	Gata3	664.4	754.891	1288.19	924.582	852.155	822.978	685.084	695.384	755.755	730.997	885.526	691.302	828.944	647.356	541.3	912.004	834.83	676.461	1212.92	661.219	550.499	604.627	696.528	800.383	615.204	612.802	659.414	638.593	433.012	534.653	983.747	191.083	509.664	714.217	426.744	723.813	532.283	681.561	594.962	604.849	638.586	724.764	541.252	608.027	565.557	738.759	580.614	657.163
MA0038.3	GFI1	1032.93	1968.68	2007.3	1196.88	1724.13	1520.81	1301.04	1569.38	1605.23	1358.08	1838.62	1473.53	2803.32	1437.68	1218.08	1099.36	2614.04	1162.33	993.861	1464.18	2818.01	881.38	921.432	944.093	796.542	875.742	809.863	1015.94	1788.99	896.014	1049.19	495.024	885.62	1342.27	1072.06	1224.91	641.657	1022.34	1074.07	923.433	1342.72	1328.73	1234.58	900.312	739.574	1021.39	1305.82	1416.55
MA0039.5	KLF4	356643	151450	92160.4	228430	359093	182986	121044	203357	192370	175840	441782	473791	478331	179546	166465	415159	500506	407317	0	0	402781	247557	260518	253919	318893	288013	266466	269811	270195	273182	277584	86052.9	297995	236262	264031	271418	184717	283363	258915	305922	285253	239639	268240	258557	310277	303753	250360	226461
MA0040.2	Foxq1	3247.6	583.385	691.958	1891.19	434.185	435.351	348.508	400.212	299.079	384.329	267.383	221.715	217.887	245.161	366.846	751.412	255.612	385.88	471.012	408.47	320.646	370.18	431.344	301.391	314.318	382.458	448.146	364.73	244.979	271.357	601.292	108.081	399.551	365.725	398.121	452.686	170.136	537.725	270.973	272.413	463.08	315.243	349.933	414.974	597.834	394.565	197.68	375.522
MA0041.3	FOXD3	427.361	2385.19	997.22	582.241	1320.57	481.485	618.427	486.636	712.177	481.433	570.704	332.572	572.105	457.04	643.992	810.89	509.964	1035.78	630.14	511.087	410.289	899.008	604.217	1001.98	941.612	1036.55	686.623	648.689	729.566	814.07	548.117	332.006	515.956	1070.37	931.551	406.691	405.896	407.166	916.988	408.619	441.935	930.997	1265.65	1410.91	593.624	878.676	763.609	1043.12
MA0042.2	FOXI1	3581.53	821.109	781.013	467.544	556.694	509.589	420.925	395.78	549.803	473.719	317.697	257.837	371.26	337.975	398.397	582.889	289.609	490.551	656.834	356.563	360.87	408.961	318.892	413.165	326.408	465.034	318.503	354.634	279.362	318.374	496.986	132.564	1278.88	382.958	333.068	801.278	549.297	440.359	349.516	554.06	759.114	346.178	469.303	409.561	467.321	391.766	316.288	337.97
MA0043.4	HLF	271.643	874.084	333.835	369.483	628.758	201.502	172.402	206.532	208.937	186.946	267.383	241.644	200.845	231.567	196.724	431.219	219.096	228.091	333.411	198.845	747.024	179.802	268.541	181.633	159.846	223.825	264.086	162.803	127.862	147.768	323.143	57.922	169.888	323.6	147.018	179.138	218.747	241.202	215.993	217.007	219.91	209.18	291.066	167.794	169.807	237.858	154.755	333.797
MA0046.3	HNF1A	416.98	241.035	1078.18	370.358	225.2	127.795	103.277	114.789	84.1718	100.733	138.004	107.121	116.856	127.502	124.344	177.444	144.804	151.54	162.228	146.139	87.3444	104.003	151.054	157.681	107.459	128.21	152.049	127.466	159.022	119.558	329.279	40.6051	245.394	111.058	204.265	152.509	114.234	99.5787	145.304	126.972	222.025	136.998	171.696	155.164	127.706	123.126	337.75	196.106
MA0047.4	FOXA2	3612.68	852.232	1639.65	618.139	987.275	549.359	428.743	421.929	583.233	504.12	342.135	261.574	404.125	349.694	430.565	636.42	318.57	720.205	738.637	394.096	395.348	389.57	335.676	433.125	355.959	486.765	342.511	384.923	280.437	358.674	492.896	149.283	709.44	434.658	374.702	593.091	566.311	442.572	406.459	468.642	583.608	328.501	513.454	427.603	481.355	425.346	345.657	373.436
MA0048.3	NHLH1	7889.75	10766.5	11147.5	16259	11739.2	16724.2	15047.2	19098.9	24217	16705.8	13783.1	25496	12176.1	24566.7	18025	13998.3	9646.5	11028	15104.2	18597.6	17650.5	12982.7	20315.1	18354.9	18599.9	23177.8	19270.3	16068.3	19537.1	19465.1	16709.4	9482.48	19722.7	25474.4	18726	26047.6	17558.1	25104.9	23939.9	24584.1	21931.8	22519.2	21561.8	13207	19953.1	17187.3	17770.8	24999.3
MA0050.4	Irf1	1185.19	2888.45	2325.89	990.248	2111.47	1402.56	1395.68	1301.24	1469.13	1210.16	2137.62	1685.28	2223.91	1237.52	1031.25	1981.63	2300.5	1795.04	1131.29	1286.9	1574.5	1662.28	1200.04	1293.39	972.506	1212.57	1209.99	1643.18	1170.1	1151.25	1378.47	495.621	1131.01	1478.22	1060.35	1280.59	1049.98	1307.8	1136.91	1359.76	1387.13	1577.69	1180.62	1797.02	1023.05	1628.63	1245.95	1727.4
MA0051.2	IRF2	1057.16	1703.14	1856.33	4394.39	4440.94	1139.55	1101.07	967.511	1329.44	4049.75	2819.02	1787.42	3258.57	1494.4	1062.18	2053	2998.08	2882.38	1718.55	983.842	1827.34	2356.81	3096.61	2155.65	1715.32	3722.45	3399.5	1889.28	2594.85	2932.53	3634.34	4796.18	3397.76	3638.1	3004.12	2965.46	2960.37	3666.71	2894.3	2490.96	3598.92	3413.17	2104.51	2724.39	1698.07	2568.87	3263.41	3504.87
MA0052.5	MEF2A	780.324	1727.64	2340.66	773.111	1500.73	1151.21	949.242	1001.64	890.669	1389.85	799.273	772.265	828.944	686.732	563.57	1995.5	804.61	838.937	766.536	1024.57	649.337	613.441	713.312	924.133	581.623	541.091	761.847	740.818	1582.69	959.151	1151.45	433.519	695.282	1202.49	856.09	670.556	532.283	511.171	655.833	540.209	754.885	1832.53	958.229	701.847	602.044	772.339	2741.54	1128.65
MA0056.3	MZF1	25555.2	23770.5	19592	32329.7	30528.1	28776.1	28340.2	28638.4	22924	28031.5	20298.1	20318	17443.1	24147.7	21171.3	17487.7	18878.7	15655.5	25435.2	26505.5	17479.2	24865.5	26317	19023.6	22033.2	21795.8	25730	27334.6	54026.5	34068.7	41885.9	14787.4	37789.1	42684.5	30168.7	38088.6	19888.9	33046.8	32954.6	31064.3	38752.9	47877.1	34040	30560.1	21767.6	21356.9	68501.1	40938.1
MA0058.4	MAX	0	0	0	0	0	0	0	0	0	0	0	0	0	0	0	0	0	0	0	0	0	0	0	0	0	0	0	0	0	0	0	0	0	0	0	0	0	0	0	0	0	0	0	0	0	0	0	0
MA0059.2	MAX::MYC	2666.25	2184.55	6035.7	1256.42	1781.78	2526.2	4942.07	2592.29	4670.64	2152.15	1625.86	1467.3	1886.73	3850.39	3322.03	2104.55	1528.63	1987.2	3803.23	2557.03	3602.96	2032.46	3680.69	4323.27	3065.28	3142.24	3895.67	3200.54	2128.53	3186.42	2656.73	816.282	3301.8	2368.6	2876.62	3730.42	5808.94	4728.88	2658.68	4467.11	3820.94	2681.04	2639.22	2448.34	8977.34	3047.38	2437.67	2977.05
MA0060.4	NFYA	3699.19	3228.81	3121.19	3362.99	2659.16	3286.08	2783.13	3114.83	4155.46	2961.65	5247.03	3116.46	6396.62	2487.24	4559.29	2234.41	8658.05	3799.43	3738.3	2938.35	1666.44	1438.41	1168.15	1079.82	891.912	947.453	1069.15	1094.19	1287.22	2757.9	2632.19	417.396	1804.27	1734.8	1256.81	1861.58	1246.86	1484.83	1323.45	1532.9	2122.98	1769.19	1304.89	1564.27	1009.02	1105.34	1373.59	1883.87
MA0062.4	GABPA	8583.56	5410.05	18508.1	8481.46	8887.28	14880.9	12574.3	14136.8	13588.7	14242	9231.89	8096.33	8898.06	14373.1	11703.8	10106.4	9335.49	11478	11188.2	13055.1	13030.4	9451.92	9954.48	8580.67	6643.67	10135.1	9615.92	10892.7	7799.58	8249.51	9426.38	3430.53	7781.81	10244.1	10828.6	10423.9	8623.48	9497.59	9450.67	10028.5	8974.03	9576.6	8821.92	9062.66	9204.68	9833.33	7105.18	10182.9
MA0063.3	NKX2-5	1128.1	772.108	1010.55	718.827	870.172	1158.11	1431.48	1167.84	1111.55	1028.66	915.714	701.267	678.006	1311.12	1034.96	997.256	711.431	662.401	1372.39	1102.03	997.565	530.591	397.776	467.057	449.986	673.648	404.932	561.608	601.703	662.271	834.446	212.58	679.552	733.365	645.32	796.437	476.381	581.982	657.797	660.255	729.51	677.625	600.119	582.767	599.238	646.414	624.668	682.198
MA0065.3	Pparg::Rxra	37429.6	52392.1	48874.7	45696.8	51073.5	81150.8	75673.2	82764.9	89646.6	79051.6	59831.9	67134.8	61761.8	86228.2	73502.3	58087.7	62072	55668.2	70852.8	82169.2	60373.4	50457.3	63622.4	64471.8	54766.6	66852	62521.1	59902.8	55248.2	62696.8	50602.6	24432.9	51729.3	66925.8	67385.2	59911.9	57037	61141.3	61703.3	55618.4	54176.2	65604.4	59881.1	57766.1	63606.2	73929.1	60194.1	64493.8
MA0066.2	PPARG	4200.95	3261.92	2974.04	3887.45	2367.3	6836.76	4084.58	4821.15	5462.81	11501.7	1689.11	2304.34	1807.61	4371.65	13835	3585.56	2085.19	2096.56	4184	4716.37	3314.49	3206.46	4595.41	3397.14	3335.27	3383.45	4164.55	5501.24	3442.6	3858.1	6201.08	1576.43	4338.44	4603.16	5429.27	7932.9	4117.3	4925.82	3974.27	3744.52	6170.18	4105.52	3715.18	3792.5	4066.96	3825.32	3981.84	4539.64
MA0067.3	PAX2	1655.81	723.106	1457.73	973.613	2534.85	1578.61	1791.92	1935.02	1525.84	1592.68	1835.74	1199.5	2589.08	1520.65	1825.57	1452.27	1754.02	1465.41	1390.13	1731.31	2213.49	2527.8	3402.08	3417.1	3597.2	1953.58	3661.99	2469.82	5316.48	2847.9	2521.75	861.067	2888.1	1499.28	2047.85	1953.57	4394.38	3317.08	2827.54	3723.75	3224.65	1903.24	2913.93	3336.03	3274.06	2356.19	2714.43	1698.19
MA0068.2	PAX4	262.992	131.113	335.264	448.282	194.572	154.308	172.814	148.473	421.456	117.522	399.637	421.009	472.291	163.128	151.564	219.079	452.042	203.095	138.462	129.369	142.509	119.868	364.209	169.657	141.04	130.383	419.336	246.098	248.203	169.262	1022.61	109.275	500.226	296.793	149.62	491.418	167.706	225.712	259.192	233.167	484.226	393.317	338.487	184.032	176.824	145.513	428.118	216.968
MA0069.1	PAX6	446.394	282.753	441.939	309.07	372.931	355.281	303.659	283.649	309.227	373.439	1316.79	1259.29	1704.14	322.038	617.391	303.34	1555.07	307.766	446.902	287.886	451.662	283.805	233.295	347.298	334.467	367.247	235.276	281.435	290.107	274.043	259.742	96.1385	239.102	247.008	205.566	280.81	294.093	309.8	274.9	307.042	270.659	234.222	279.62	342.804	304.531	299.421	257.548	327.538
MA0070.2	PBX1	1358.21	602.588	1166.76	703.067	544.082	625.188	572.343	442.759	351.611	634.801	520.39	473.324	344.481	717.67	350.762	439.149	391.602	432.748	420.897	396.891	340.183	292.618	208.119	199.597	245.813	308.574	203.266	344.537	395.405	291.507	591.066	162.42	311.461	398.277	279.725	329.226	211.455	243.415	526.237	240.093	376.385	443.402	359.745	313.937	249.799	313.413	302.733	425.591
MA0071.1	RORA	2155.84	2079.26	1877.76	970.986	2100.66	1689.97	1681.23	1688.6	1577.77	1623.98	2512.82	2719.12	2586.65	1409.09	1519.97	1581.14	2489.38	1477.9	2437.38	1594.75	1289.48	1323.83	1181.58	990	1092.06	1223.43	1062.75	1992.76	1680.47	1363.5	3810.23	597.134	2490.12	1616.08	1917.75	2694.33	1079.15	1617.6	1376.46	1373.61	2689.67	1621.88	1810.17	1533.6	1272.85	1340.4	2164.31	1798.33
MA0072.2	RORA	903.169	1446.87	630.049	1019.14	1046.73	1024.48	847.2	889.064	1939.53	1039.1	1300.98	1306.62	1351.14	966.581	922.993	826.751	1364.94	1020.16	1341.74	788.591	733.233	807.344	582.399	614.758	607.145	730.148	640.208	877.119	826.268	634.061	2122.93	365.446	1121.58	878.889	841.778	2415.94	605.199	1194.94	822.737	817.239	1545.72	1000.23	771.816	1080.74	813.953	702.381	1177.04	917.942
MA0073.2	RREB1	633729	223492	122898	317039	379791	152590	204122	169797	149866	142691	357505	287066	471681	133906	287073	276213	465630	215319	47389.7	100556	310074	327241	356785	217990	518531	330185	360352	306398	264050	287591	446662	1998.01	579988	220793	222060	266794	129585	267559	197848	274955	390070	237967	227805	378837	385272	316021	363682	194620
MA0074.1	RXRA::VDR	22819.7	3213.58	5423.75	4536.23	3534.73	7643.3	6249.28	6583.77	4256.94	7019.12	2683.89	3461.49	2294.51	5163.85	3770.54	3129.56	3049.71	2438.7	4152.66	6378.61	2491.61	5938.74	4827.03	3005.93	3547.5	3524.7	4907.19	4682.17	6873.39	5479.52	22720.3	2292.99	11834	5374.82	6639.25	15880.3	3594.74	8311.5	4551.56	4799.55	16689.9	5518.22	6035.53	6437.51	4475.34	3556.68	8886.55	5424.2
MA0075.4	PRRX2	503.491	262.225	550.042	882.555	304.47	255.59	269.507	233.568	525.925	202.374	544.828	539.34	617.143	215.629	243.739	290.453	590.551	287.457	241.792	218.809	211.465	190.378	528.69	231.532	220.292	193.402	622.602	374.826	336.309	317.03	1642.3	139.132	884.047	434.658	255.006	842.431	277.079	314.226	371.115	355.522	888.1	533.261	412.071	285.069	269.447	257.446	560.281	321.28
MA0076.3	ELK4	12405.6	1909.74	4571.78	2321.96	3623.01	4212.46	5063.04	4319.45	3055.85	3556.52	3307.78	2395.27	3371.77	4002.73	4125.01	3316.92	3118.96	3880.67	4829.98	4218.86	5159.06	4237.68	1908.32	2902.14	1711.29	1401.62	2159.1	2154.3	2659.31	2419.37	3556.62	959.594	2733.94	1673.53	2374.41	2885.57	2821.83	2960.81	2114.77	3520.59	3347.29	2159.56	2339.97	2679.29	2134.52	2174.3	2125.91	1685.68
MA0077.2	SOX9	1088.3	1362.11	1693.94	2750.11	1288.14	998.497	988.742	914.326	1056.03	930.649	1029.28	1130.99	855.723	1040.65	3400.6	1270.86	943.118	1238.88	2308.73	857.668	1090.66	1119.35	701.564	417.157	448.642	558.476	637.007	569.181	1620.3	754.962	5434.13	546.377	1816.86	1156.53	623.202	2149.65	524.992	1655.22	915.024	842.633	2554.34	1031.17	817.601	1133.06	401.363	607.238	1330.67	1767.04
MA0078.3	Sox17	2617.81	5335.89	3572.18	3293.82	2947.41	2658.77	2485.23	2481.93	2193.84	2330.93	2589.01	2395.27	2345.63	2467.55	4318.64	2927.33	2406.27	3376.06	3970.97	2291.51	2564.02	3613.66	2307.77	1411.15	1532.64	2001.39	2336.76	2375.16	3381.36	2790.14	6387.2	1209.79	5442.71	3952.13	3769.14	6737.03	2345.45	7426.36	2648.86	3086.58	7098.45	3215.77	2806.01	3521.86	2078.39	2048.38	3510.79	4137
MA0079.5	SP1	143429	183765	166540	139961	232566	234432	147927	138332	208090	223107	250588	473683	285159	127438	219535	248969	291067	657225	32469.2	136888	241709	631786	649500	577511	241277	508989	668353	412234	367382	452268	525433	58611.7	669322	244079	313609	308557	397628	490525	327166	510396	534410	262236	361592	548103	666773	659871	355337	249021
MA0080.7	Spi1	24570.7	29956.6	39791.6	18170.3	61931.7	38093	30975.7	34682.8	42615.4	35845.6	67499.8	51836.4	69189.4	49145.6	32545.4	41607.2	74614.6	45179.2	43065	32791	41184	40739.2	44277.4	40745.7	34160	37913.3	43932.7	38020.3	27130.4	33577	39139.2	12977.5	35220.3	38330.3	35457.5	39611.2	37677.9	41823	36738.4	35970	38862.8	33985.8	32023.8	47738.2	35776	49082.7	30525.2	38787.2
MA0081.3	SPIB	20009.9	25280.2	24563.8	16941	41148.5	32392	26874.2	31145.2	36857.1	31112.5	43596.3	33079.1	42114.3	42075.3	28488.4	31091.4	45415.7	33023.2	36264	28596.5	29189.1	32782.1	28925.2	30584.2	25214	30051.2	28273.2	27315.6	21493.7	25418.9	32093.5	9958.99	29104.3	28905.7	29124	33201	27666.6	30391.4	26967.7	28381.7	31292.8	26263.8	23674.5	33650.8	27827.4	36840	23671.9	29029.9
MA0083.3	SRF	808.007	1070.75	2213.98	2031.28	1711.52	684.578	625.422	696.714	942.008	682.446	787.773	610.339	620.795	693.763	812.259	1267.88	622.03	887.367	1078.76	665.212	817.13	691.002	730.096	556.875	561.475	465.034	824.268	1677.25	980.991	748.246	7205.28	262.739	2266.75	949.737	824.865	1650.97	619.782	907.272	534.091	868.028	3370.55	1009.07	690.056	1017.59	526.263	652.011	1240.3	1007.65
MA0084.2	SRY	3616.14	940.303	891.021	1484.93	839.544	511.71	505.275	542.036	483.54	453.3	615.268	530.621	814.337	421.414	486.242	914.977	565.367	724.891	750.864	559.001	663.128	394.858	387.706	457.077	377.451	497.63	396.929	333.179	492.108	386.885	544.026	190.486	413.709	635.711	672.642	426.057	255.204	630.665	549.8	339.362	494.798	596.604	539.617	402.344	345.228	520.489	521.875	717.664
MA0087.3	Sox5	1384.17	1768.03	2002.06	1874.55	1648.46	1530.36	1331.08	1380.58	1298.4	1358.99	1391.54	1444.88	1088.22	1346.28	1632.56	1727.85	1103.03	2423.07	2275.5	1382.73	1341.2	1782.15	1268.86	644.698	838.182	1129.99	1349.24	1412.22	2440.12	1727.55	4035.2	823.447	3690.34	2573.48	2382.22	4270.26	1509.35	5155.96	1568.89	1562.91	4478.56	2054.97	1700.61	1979.24	1028.67	973.819	2493.02	2872.74
MA0088.3	ZNF143	8391.51	5474.28	9850.28	29305.6	8750.36	13946.6	14048.1	13973.3	12650.8	13584	12542.6	11754.6	8301.61	11611.2	12304.5	7864.05	9324.15	7164.55	12126.6	14990	9325.16	11986.8	11579.2	9568.67	10770.1	11315.1	11896.7	12795.8	13125.7	12755.1	12942.1	4767.52	12371.9	13397.8	11544.2	13624.1	10310.3	13219.6	12816.2	12457.1	13186.2	14309.7	12452.1	11714.9	11438.8	9668.23	14435.1	13927.7
MA0089.3	MAFG::NRF1	889.327	952.222	842.446	766.983	778.29	1218.03	1104.77	1153.21	1226.76	1158.89	876.9	1112.31	636.619	1126.9	1020.74	828.734	653.509	874.869	901.898	1048.53	752.771	1073.52	1047.31	876.23	1104.14	1312.53	933.103	1144.67	1295.81	1160.65	989.882	547.572	1033.49	1363.33	1706.98	1205.55	1139.91	1292.31	1272.39	1338.98	1116.47	1430.38	1407.91	1010.37	1220.93	985.012	1121.69	1477.05
MA0090.4	TEAD1	2033	1848.82	4296.05	3300.83	2401.53	2675.21	2067.18	2446.48	1935.35	2651.28	2172.13	2248.29	2288.42	3212.87	2548.75	6009.31	2265.25	2585.55	2179.74	2303.88	4060.36	2295.11	1057.38	1077.82	1006.09	1460.3	963.513	1445.04	2756.02	2756.55	1497.09	1242.64	1322.92	3555.77	4102.21	1958.41	1754.83	1544.58	3237.93	1569.84	1632.41	3501.55	3030.03	1742.89	1119.89	1136.12	3096.23	3990.96
MA0091.2	TAL1::TCF3	2825.43	4273.74	2166.83	1533.09	4286	2148.12	1951.15	2102.11	2998.55	1956.13	2445.26	2915.92	2535.52	2239.73	3605.36	6477.21	2282.88	1854.41	2663.33	2027.58	2293.94	1311.49	1834.47	1868.23	1579.65	2144.81	1610.12	2175.76	1549.39	1688.59	1992.04	742.237	1816.86	2284.35	2410.84	2336.05	1460.74	1683.99	2102.99	1789.15	1981.31	1990.15	2171.55	1463.23	1821.57	1902.86	1501.24	2409.6
MA0092.2	Hand1::Tcf3	2584.93	3071.21	6278.58	1487.56	2030.4	2864.52	2115.74	2476.17	2985.41	2935.79	2229.63	2390.29	2350.5	3943.67	2713.92	2247.3	2227.47	2246.54	3813.56	2359.39	2156.03	1697.54	1854.61	1880.2	2126.35	3129.2	1800.58	2365.07	1990.99	2051.29	1513.46	939.291	1242.7	2638.58	2235.2	2219.86	1531.23	1641.94	2415.19	1724.51	1704.31	2557.3	2240.23	1899.86	3168.8	2098.75	2016.33	2578.58
MA0093.4	USF1	2757.95	3453.29	4132.7	1835.15	1952.93	3188.51	3466.56	3358.59	5621.6	2914.91	3184.15	4187.67	4105.77	3552.26	3070.25	2789.54	3811.51	1962.21	3596.05	3286.13	2632.97	1500.11	1752.23	2201.55	2045.76	1777.56	1842.2	1994.03	1980.25	2412.66	2231.33	815.087	2932.14	1945.43	2258.62	4633.37	2394.06	3350.27	2040.15	2525.59	3639.09	2604.44	2321.99	1762.74	2316.96	1888.87	1942.91	2132.13
MA0095.4	Yy1	8469.37	19431.2	4399.86	14261	8202.67	3075.56	2543.24	2692.9	4068.9	2636.31	5905.42	7193.28	5932.85	3823.2	3481.02	6632.84	5942.02	7222.35	3764.31	2704.77	4923.46	2957.91	4177.49	3235.46	3362.13	3250.89	4034.91	4318.71	7664.2	3927.95	8651.24	2201.63	6611.47	9351.84	16488.2	6478.01	3650.64	4545.21	3827	4088.5	8601.88	10824.3	5062.59	3790.69	3805.93	3858.9	17125.8	9089.71
MA0098.4	ETS1	6683.8	1001.22	3926.49	1365.86	2524.04	1593.99	1786.16	1545.45	1467.93	1275.96	951.653	941.665	1645.72	1575.03	1725.35	1330.34	1261.69	1484.15	1745.59	1563.21	1568.75	983.62	572.328	991.996	601.772	532.399	725.035	918.766	1422.6	862.43	2184.29	323.049	1263.15	679.751	788.435	1295.12	879.847	1203.8	793.283	1484.42	1668.36	1054.74	976.216	949.027	755.011	892.667	963.548	721.836
MA0099.4	FOS::JUN	539.825	1087.97	652.908	1224.9	681.004	829.341	764.496	806.185	817.243	731.451	347.885	423.5	360.305	754.233	713.278	570.002	351.308	773.322	801.323	766.63	493.036	549.981	528.69	576.835	560.131	623.668	529.772	686.551	566.246	573.61	576.75	279.459	597.754	622.307	703.867	656.031	580.894	710.328	706.886	796.461	562.463	668.786	750.558	580.963	659.582	559.666	554.633	753.13
MA0100.4	MYB	0	0	0	0	0	0	0	0	0	0	0	0	0	0	0	0	0	0	0	0	0	0	0	0	0	0	0	0	0	0	0	0	0	0	0	0	0	0	0	0	0	0	0	0	0	0	0	0
MA0101.1	REL	6804.91	9007.7	12435.2	8612.79	9305.25	9119.04	9753.7	9338.72	8460.76	10936.4	10032.6	9923.61	13288.7	8289.07	8546.35	11718.3	12926.6	10026.6	11102.8	9637.98	13621.1	7941.24	8883.67	9616.57	9031.95	8411.91	8913.3	10358.8	13180.5	15337	6906.68	4993.83	9144.06	14558.2	15036.2	7903.85	9466.87	8382.31	14175	8435.57	8153.6	15553	16657.8	8530.42	8500.19	8299.85	16700	14290.7
MA0102.5	CEBPA	410.059	760.851	477.18	654.912	895.394	453.911	327.935	419.713	548.012	386.598	583.642	514.428	507.591	563.917	473.25	709.777	537.665	759.261	475.145	414.46	787.249	424.825	515.263	429.133	402.972	521.534	460.95	527.533	361.022	413.752	631.97	132.564	846.294	501.675	381.207	583.408	439.924	557.641	384.86	524.048	566.692	381.532	366.285	490.752	465.918	590.448	315.158	506.954
MA0103.4	ZEB1	0	0	0	0	0	0	0	0	0	0	0	0	0	0	0	0	0	0	0	0	0	0	0	0	0	0	0	0	0	0	0	0	0	0	0	0	0	0	0	0	0	0	0	0	0	0	0	0
MA0104.5	MYCN	3612.68	5012.74	10569.4	1873.68	2824.9	3499.78	8234.17	4090.76	4294.55	3389.54	3053.34	3300.81	3534.88	5116.97	4689.2	2595.24	3281.4	3530.72	4641.58	3880.27	6470.38	3596.03	8022.66	9317.18	6272.94	5350.07	8233.07	6267.3	5570.05	5865.06	5677.51	1815.29	8566.76	4679.75	5443.59	9973.61	15778.9	11714.9	5411.6	9769.93	10268.1	4675.61	5883.46	4207.47	18793.9	6223.49	4540.99	4581.37
MA0105.4	NFKB1	39903.8	23642.7	20992.1	42806.6	14944.2	31426.4	33548.1	30065.1	29768.8	32310.4	18656.4	19939.4	23428.3	29878.7	33730.1	31412.6	23999.8	16155.4	38391.9	30584.6	29924.6	34298	51123.5	37172.9	55479.9	43346	52247.4	59184.7	45836.9	50092.2	26495.7	17236.9	27268.6	40063.2	49269.4	25282.6	45530.9	38986.2	47318.2	33236.7	29256.5	41884.6	49930.9	45205.1	50241.9	29978.5	52154.7	33511.1
MA0106.3	TP53	808.007	848.259	1904.43	1335.22	657.583	1536.72	1210.11	1293.71	3294.64	1305.45	1311.04	1164.63	1024.92	1442.84	1722.88	1276.81	1193.69	1160.76	1833.24	1272.93	2048	1582.96	1278.93	1920.12	1619.95	1744.97	1226	1597.74	1322.67	1773.22	820.13	563.694	998.878	1514.6	1236	1503.3	2187.47	1577.77	1388.25	1396.69	1416.73	1461.31	1520.74	2060.43	1887.53	1832.91	1425.55	1543.81
MA0107.1	RELA	5206.2	13062.3	10570.3	7275.83	8707.12	12415.2	12329.4	12238.1	10797.9	12304	8721.57	10007.1	11196.2	11302.3	11192.2	43375.7	10962.3	8239.39	16255.5	12845.5	17845.8	9420.19	11443.2	11969.8	12129.5	10884.8	11301.3	13496.3	19988.4	19813.1	8127.67	8023.68	10231	21313.5	19187.9	10540.1	12944.9	10606.2	21135.9	10725.7	10902.5	21738.5	23321.3	13338.7	11099.2	10127.2	23898.9	18519.5
MA0108.3	TBP	0	0	0	0	0	0	0	0	0	0	0	0	0	0	0	0	0	0	0	0	0	0	0	0	0	0	0	0	0	0	0	0	0	0	0	0	0	0	0	0	0	0	0	0	0	0	0	0
MA0111.1	Spz1	9057.64	13026.5	28157.9	22103.3	10224.1	19265.2	16408.3	18325.1	16894.1	20192	10013.9	17187.9	9178.03	17623	15825.1	9834.77	10235.8	13118.3	23313.8	17895.2	11345.6	15075.1	14976.2	13440.8	13975.1	16502.2	14996.9	14287.6	11278.7	15449.9	12698.7	5826.83	11388.8	14644.3	13909.5	14454.5	12930.4	13069.1	14084.7	13380.6	12410.1	14343.5	13699.7	14280.5	13470.9	14892.7	11838.2	14109.2
MA0112.4	ESR1	8099.11	4564.44	8115.86	7069.2	4622.9	7280.07	6055.89	5910.55	6670.47	6615.27	3636.98	4648.54	4668.14	5333.54	7254.65	5112.18	3748.55	5975.67	5419.48	5639.53	4607.42	5859.42	8546.32	8101.63	7939.9	7055.92	8788.45	9649.57	9225.4	8866.11	8025.41	3649.68	9126.76	9051.22	8091.22	10048.7	9724.5	11648.5	8808.58	8758.77	10927.9	9327.65	9848.83	8218.28	9127.5	9483.54	9881.73	8720.45
MA0113.4	NR3C1	1095.22	1937.55	1436.3	3687.82	942.235	2122.14	1967.61	2216.45	1706.72	2097.7	851.025	832.053	979.883	1995.98	1695.04	1398.74	886.456	1591.95	1581.81	2126.2	1421.64	2087.11	2784.44	2492.96	2613.95	3594.24	2615.25	3648.56	2613.11	2902.98	2354.04	1271.3	2228.99	3442.8	2991.11	4977.12	3176.69	3124.56	3108.33	2717.2	2717.16	2999.23	3275.31	5194.39	2892.34	2123.93	2755.09	3404.73
MA0114.5	HNF4A	5559.16	3810.87	4201.28	2583.75	4001.35	3930.36	5488.08	5222.25	3140.03	3616.87	3726.11	3835.17	3948.74	3094.75	3115.41	3192.01	3665.44	3082.35	3615.17	5305.32	4314.35	2134.7	2398.41	2227.5	2129.04	2735.88	2242.33	3406.25	3191.18	3096.42	3358.24	1277.87	3451.24	4013.4	3797.76	4817.35	2107.26	3954.38	3267.38	3834.56	4472.22	4180.65	3396.32	2287.77	2332.4	2585.66	3998.78	4055.64
MA0115.1	NR1H2::RXRA	2458.63	2608.35	2140.64	2235.28	1803.4	2753.69	1969.67	2252.8	4743.47	2556.45	1758.11	2314.3	1621.37	1987.07	3459.99	1895.38	1887.5	1907.53	2498.69	2121.81	2157.18	1591.77	1834.47	1730.5	1464.13	1897.08	1746.17	2293.13	2332.68	3285.83	2010.44	916.6	2334.39	2410.72	2162.34	3101.02	1764.56	2768.29	2317.01	1929.98	2524.74	2594.12	2433.18	1755.52	1829.99	3598.65	2334.88	2246.87
MA0116.2	ZNF423	53517.1	43791	46708.8	58334.5	43418.5	88101.1	84824.1	81047.1	64054.8	108581	40400.7	63762.9	41402.2	74713.6	79494.3	46072	43001.9	38153.7	72893.6	84985.8	65258.9	77965.1	119073	101992	104636	88165.3	125922	113791	102612	110292	53975.2	38557.5	68048	95400.7	103332	66167.2	121786	89355.3	109903	85110.6	66829.5	100850	114891	85183.3	111472	77152.8	113017	86367.9
MA0117.3	Mafb	629.796	1244.91	825.778	735.463	870.172	838.356	662.453	737.045	1209.45	745.063	481.577	908.034	556.281	720.952	929.179	866.403	567.886	648.34	743.975	676.392	704.501	710.393	773.734	704.577	671.62	873.569	747.443	839.258	919.747	791.233	934.662	333.201	810.114	989.947	662.234	1408.89	641.657	794.417	950.369	932.668	1006.51	754.226	817.601	692.826	684.843	845.096	656.297	955.494
MA0119.1	NFIC::TLX1	3915.46	2652.05	3258.82	4412.78	3190.63	8831.11	7268.88	8044.12	10452.8	8193.88	3356.66	4271.12	4152.02	8472.35	15551.1	4317.15	3200.81	4454.02	6471.04	7513.38	6673.8	4985.09	8563.1	7259.34	6538.9	15924.2	8309.9	7423.33	7392.36	6376.88	4139.51	2667.4	4420.23	7735.76	6786.27	5381.39	6892.95	7065.66	7263.25	6445.57	5011.42	9392.47	6558.8	5578.69	13955.1	6430.56	5583.61	7860.92
MA0122.4	Nkx3-2	626.336	943.614	569.091	1218.77	554.892	583.296	546.833	526.967	879.327	464.19	562.079	468.341	507.591	720.952	633.475	642.368	582.996	563.978	733.47	521.468	591.873	405.435	332.32	413.165	362.675	375.939	387.326	382.399	206.298	270.013	1059.42	96.1385	438.877	344.663	342.176	426.057	349.995	354.058	329.88	373.991	551.89	300.512	323.77	357.238	397.153	551.271	269.974	298.331
MA0124.3	Nkx3-1	1404.93	2115.02	1024.36	2669.55	1248.51	2604.15	2519.79	3931.2	2287.56	2386.29	1739.43	1593.11	1301.24	6330.59	1695.04	1401.71	1461.9	1416.97	1684.97	4343.44	1322.81	861.99	785.483	960.061	772.364	845.32	841.873	864.498	696.257	654.211	2225.19	234.076	1304.05	700.814	966.679	1186.18	768.044	1031.19	755.975	1022.7	1579.55	757.172	711.313	916.551	830.793	1301.22	650.649	678.025
MA0125.2	Nobox	0	0	0	0	0	0	0	0	0	0	0	0	0	0	0	0	0	0	0	0	0	0	0	0	0	0	0	0	0	0	0	0	0	0	0	0	0	0	0	0	0	0	0	0	0	0	0	0
MA0130.1	ZNF354C	0	0	0	0	0	0	0	0	0	0	0	0	0	0	0	0	0	0	0	0	0	0	0	0	0	0	0	0	0	0	0	0	0	0	0	0	0	0	0	0	0	0	0	0	0	0	0	0
MA0131.3	HINFP	7623.3	2222.95	5719.49	3592.39	2940.21	4273.44	4723.58	4881.87	2914.97	4275.27	3425.66	6969.07	3771.03	5364.48	3656.71	4816.77	3484.12	4927.39	6380.62	5624.75	6218.69	7579.87	12091.1	15013.7	13828.7	6871.21	13594.8	9816.16	10536.3	10401.6	7812.71	2733.68	12713.3	5851.6	5800.07	13648.4	16775.4	15467.9	8197.91	13936.9	13911.4	6101.57	9372.98	8645.89	10925.2	10342.6	8215.57	5111.27
MA0132.3	PDX1	0	0	0	0	0	0	0	0	0	0	0	0	0	0	0	0	0	0	0	0	0	0	0	0	0	0	0	0	0	0	0	0	0	0	0	0	0	0	0	0	0	0	0	0	0	0	0	0
MA0135.2	Lhx3	226.657	360.229	1951.58	189.119	264.835	126.734	136.194	143.154	125.959	106.178	231.444	143.243	165.545	131.721	124.963	254.766	159.915	218.717	323.078	150.93	109.18	112.817	176.23	187.621	131.638	126.037	246.48	170.376	198.777	102.095	447.901	66.879	146.292	185.735	135.309	191.242	153.123	97.3658	157.086	136.206	177.62	216.545	153.709	167.794	145.95	187.488	378.416	181.502
MA0136.4	Elf5	5799.66	4477.03	6102.38	6685.71	21008.4	8354.92	6200.32	6943.21	8485.24	7621.25	19258.7	14032.8	19154.6	10798.3	7545.41	11185.9	20723.4	13029.3	10025.9	6656.51	9455.03	8191.55	6500.37	8526.78	6760.53	7171.09	6448.49	6943.75	4454.75	6206.27	9632.95	2266.72	6954.4	7609.38	6816.19	7777.97	7600.23	7229.41	6687.93	7484.43	7299.33	6260.66	5703.59	7817.74	5930.63	11878.9	4963.46	6611.27
MA0137.4	STAT1	1936.1	1747.51	1458.21	3255.3	2158.31	2217.06	2334.22	1989.98	2106.09	2197.53	2054.25	1742.58	2679.16	3376.94	1923.31	2197.73	3008.16	2334.02	1839.44	1723.32	2850.18	3125.37	1878.11	1936.09	1787.85	2042.67	1779.78	2522.82	3273.91	3194.48	1701.62	1509.55	1536.86	3505.98	4128.23	3185.75	2289.55	1854.38	3308.62	2040.79	1820.6	3800.59	3054.56	1757.32	1778.07	2258.25	2931.31	3884.56
MA0138.3	REST	6246.05	13567.5	10975.6	6224.29	3680.66	10679.6	11931.2	11222.8	12119.5	12065.8	3746.23	5288.77	3150.23	13917.9	30163.1	6200.63	4070.9	5791.32	9774.84	10838.2	8121.88	12869.9	15939.6	13979.8	13480.8	13614.2	16275.7	14355.7	19104.1	14461.2	9393.66	6940.48	10440.2	16532.3	14187.9	10871.7	17195.9	13976.4	17332.4	13941.5	10669.9	15398.3	16636.6	13398.2	14479.9	11599.1	15241.7	15628
MA0139.2	CTCF	68050.8	19231.2	19122	20030	15236.1	27770.2	28841.8	31643.3	28816.6	28915	14430	21863.8	15519.9	27528.3	29636	18467.1	16716.7	25729	31012.8	32301.9	25465.5	29533.3	31538.5	24428.7	22086.9	19872.6	32997.9	27581.9	26592.1	23941.2	21454.3	9295.58	23892.9	22596.5	24104.5	26986.9	26774.6	28178.6	25528.4	28972.7	25915.6	23391.3	25587.7	22094.6	22643.3	20301.9	25066.9	21315
MA0140.3	GATA1::TAL1	506.951	589.345	1003.89	1554.1	531.471	867.521	672.74	769.842	886.49	741.887	563.516	505.709	439.426	849.391	685.44	544.228	484.78	667.087	825.261	687.971	499.932	588.762	518.62	455.081	429.837	532.399	497.762	475.79	416.894	420.468	830.356	198.845	465.619	499.761	456.668	743.179	413.188	515.596	549.8	528.666	596.295	580.4	495.466	552.095	460.304	584.851	445.062	527.817
MA0141.4	ESRRB	4136.93	1369.4	1256.29	1104.95	2338.47	1198.41	1542.57	1107.56	1741.94	1043.18	1921.99	2643.14	1667.63	1058.93	1655.45	1538.51	1910.16	2209.04	1875.61	1007	1646.9	1209.25	1148.01	1241.49	1219.66	1436.39	1117.16	2348.66	1238.86	1368.87	1294.62	624.602	1214.38	1554.81	2754.32	1491.2	1302.76	1427.29	1547.29	1368.99	1535.14	1532.02	1535.46	1551.64	1317.76	1488.71	1663.9	1879.7
MA0142.1	Pou5f1::Sox2	295.866	874.746	1714.42	437.776	463.01	237.03	214.371	261.046	295.497	218.256	464.326	399.834	357.87	286.881	276.527	819.812	380.269	492.114	386.454	246.759	502.23	285.567	275.255	291.411	325.064	319.44	241.679	263.767	217.043	225.683	298.601	111.067	703.148	304.452	256.307	331.647	289.232	305.375	269.009	283.956	342.553	282.835	266.538	331.979	325.581	313.413	229.309	358.832
MA0143.5	SOX2	2122.97	2542.79	2539.24	3695.7	2125.88	1930.18	1756.94	1751.09	1767.61	1757.84	1677.61	1593.11	1317.06	1817.85	4889.64	2095.63	1377.53	2148.12	4384.8	1692.58	1718.16	2764.01	1569.29	792.399	1081.31	1301.66	1653.34	1775.69	2764.61	2015.02	6213.35	908.24	5208.33	3061.75	2801.16	5947.86	1951.71	6514.66	1843.79	2264.72	6635.37	2446.81	1921.36	2726.2	1316.36	1183.69	2773.17	3269.13
MA0144.3	STAT3	4266.69	2458.69	1816.33	2955.86	3648.23	3008.75	3170.72	2680.93	2759.16	2964.83	3001.59	2450.07	3414.37	3192.25	2459.05	2992.76	4007.94	2843.32	7576.32	2410.49	3878.78	3724.71	2591.42	2734.48	2478.28	2814.11	2429.59	3374.7	6005.22	4723.22	2082.03	2353.3	2037.08	5909.05	9426.09	2776.63	3064.88	2527.09	5046.38	2671.03	2328.09	7084.12	5469.75	2479.02	2429.23	3201.29	6890.55	6511.13
MA0145.2	Tfcp2l1	6292.77	16326.8	10354.6	15113.8	8116.2	19866.5	17325	18685.4	22810	21360.5	10282.7	11557.8	10263.8	20032.9	24758.1	8664.03	11268.3	9378.28	12529.8	18141.6	20030.6	19030.8	23823	24107.3	25077	21574.1	24817.7	27451.9	35495.1	28718.1	14073.1	11774.9	16573.5	25861.2	32111.2	16117.6	23294.1	22148.5	29761.9	21310.5	16702.6	28193.6	27845.9	20321.1	24619.3	17593.1	32451.1	29374.2
MA0146.3	Zfx	16866.1	12749	38919.7	9870.09	17351.2	21962.2	22416.8	23462.2	20828.6	22292	10220.9	11699.8	10413.5	25123.6	24026.3	10870.7	11337.6	11548.3	16146.7	23477.7	21074.1	17086.4	17676.7	23358.8	16118.9	14635.5	18558	14903.4	15311.2	18252.1	11831.5	4400.28	13525	13985.6	14483.3	10370.6	27909.6	16828.8	16906.4	18097	12213.5	15522	19156.4	14897.6	18709.7	17372	13364.3	16727.4
MA0147.4	MYC	3808.19	6948.97	14016.3	2979.5	2659.16	4314.8	4590.68	4653.62	6680.62	4150.03	4161.68	4536.44	4668.14	5651.83	5432.79	3205.89	4216.96	3936.91	6967.36	4413.72	6995.59	4140.72	7294.25	7868.11	5724.89	5693.41	7363.99	6007.32	3941.16	5315.63	5456.62	1808.72	7273.72	5359.5	6083.7	8828.58	12028.6	9847.22	5333.06	8763.38	8491.92	4905.41	5366.74	5205.21	7623.09	5840.11	3934.39	5351.19
MA0148.5	FOXA1	3581.53	821.109	781.013	467.544	556.694	509.589	420.925	395.78	549.803	473.719	316.259	257.837	371.26	337.975	398.397	582.889	289.609	490.551	656.662	356.563	360.87	408.961	318.892	411.169	326.408	465.034	318.503	354.634	279.362	318.374	496.986	132.564	1278.88	382.958	333.068	801.278	549.297	440.359	349.516	554.06	759.114	346.178	469.303	409.561	465.918	391.766	316.288	337.97
MA0149.1	EWSR1-FLI1	89604	138138	138951	100136	240774	166622	157304	174298	191038	165296	324976	251675	351837	207066	153496	190066	354716	216767	51262.3	173873	173847	192850	174944	184030	187805	159405	169727	166394	127569	152891	178674	58204.4	172394	153894	160457	164870	161236	157549	152679	163007	167855	140881	139960	195822	152091	221387	122033	151415
MA0150.3	Nfe2l2	1276.89	1082.67	1697.27	1369.36	958.45	1668.23	1775.05	1476.75	1760.44	1553.2	1174.47	1651.65	1150.3	1366.43	1337.47	1008.16	1271.76	2066.88	1239.79	1391.51	1103.3	1642.89	1389.7	1163.65	1885.91	1705.85	1246.81	1549.79	1637.49	1552.91	1331.43	658.041	1195.51	1842.03	2137.62	1459.73	1574.98	1524.66	1694.56	1581.38	1317.35	1845.79	1844.51	1365.8	1597.03	1365.59	1469.61	1904.73
MA0151.1	Arid3a	0	0	0	0	0	0	0	0	0	0	0	0	0	0	0	0	0	0	0	0	0	0	0	0	0	0	0	0	0	0	0	0	0	0	0	0	0	0	0	0	0	0	0	0	0	0	0	0
MA0152.3	Nfatc2	1507.01	3073.2	2768.78	1407.01	2722.21	2176.23	1905.48	2014.8	2057.73	1832.26	2607.7	1965.54	2463.7	1641.59	1785.98	2614.08	2022.23	2173.11	2203.68	2010.01	2672.05	2023.65	1968.74	2001.96	1525.92	1918.81	1742.97	2076.06	2777.51	2090.25	2223.14	1172.17	1890.79	3498.32	2887.03	2704.01	1927.4	2097.79	2468.21	2237.02	2638.92	3086.14	2536.2	2018.94	1466.52	2462.53	2749.44	3790.68
MA0153.2	HNF1B	425.631	221.832	911.975	370.358	207.184	125.144	99.1623	115.233	88.3506	103.002	139.441	93.4192	105.9	126.565	129.912	176.453	139.768	143.728	128.474	146.139	82.7473	102.24	134.27	169.657	111.489	115.172	150.449	123.68	161.171	118.215	319.053	42.9936	226.517	109.143	199.06	169.455	111.804	101.791	151.195	126.972	232.597	125.213	176.602	151.556	126.303	125.925	342.269	196.106
MA0154.5	EBF1	30827.1	26878.1	70186.4	85261.2	37176	73198.4	62152.1	55841.7	45595.5	85461.3	22851.2	57214.9	28903.5	55069.3	60795.7	37938.4	29525	25316.5	52568.7	57916.1	42933.2	48098.7	83648.9	61733.3	68632.9	68783.8	85448.6	91668.4	67719.6	76572.3	36451.8	29237.5	44354.9	76829.1	74712.7	49524.3	77460.6	62455.7	77400.1	54598	44182.9	78287.7	82397.9	55597.5	79234.1	55625.2	76869.2	69181.6
MA0155.1	INSM1	53788.7	39874.1	66731.8	75044.3	47126.2	94872.1	83856.3	92231.7	101761	93748.7	45409.1	50143.7	41352.3	74928.8	70326.3	59171.2	43869.5	46180.6	66566.5	93619.2	58865.5	53316.5	81633.1	62669.4	61818.6	68518.7	79838.7	64308.6	70194.1	66217.7	71365.6	26649.5	66324	75722.4	69016.7	75036.9	59900.1	68904	69033.3	70746.5	70804.8	75169.2	66299.3	64604.2	71778	64814.9	70968.2	72592.5
MA0156.4	FEV	8907.11	1015.79	3065	1107.57	1915.1	1468.32	1718.26	1615.47	1237.5	1199.72	1785.43	1036.33	1782.05	1615.34	1719.79	1264.91	1468.19	1705.99	2026.47	1628.29	2189.36	1068.23	471.625	1025.93	1046.38	380.285	704.229	855.664	1301.18	969.898	2278.37	318.272	1250.56	490.187	1007.01	1217.65	884.708	1259.12	722.594	1606.77	1723.34	1087.15	904.267	940.006	701.683	811.516	907.068	473.575
MA0157.4	Foxo3	3581.53	821.109	781.013	467.544	556.694	509.589	420.925	395.78	549.803	473.719	317.697	257.837	371.26	337.975	398.397	582.889	289.609	490.551	656.834	356.563	360.87	408.961	318.892	413.165	326.408	465.034	318.503	354.634	279.362	318.374	496.986	132.564	1278.88	382.958	333.068	801.278	549.297	440.359	349.516	554.06	759.114	346.178	469.303	409.561	467.321	391.766	316.288	337.97
MA0158.2	HOXA5	659.21	370.824	773.393	1418.39	378.335	416.792	340.279	377.165	314.6	486.878	316.259	336.309	258.056	380.164	304.365	301.358	275.758	927.986	391.448	360.955	285.019	313.771	441.414	355.282	295.513	347.689	473.754	368.516	241.756	381.511	1055.33	85.3901	657.529	294.878	236.791	743.179	347.564	351.845	286.682	376.299	763.343	306.404	323.77	362.651	318.564	372.178	323.065	279.555
MA0159.1	RARA::RXRA	19496	13817.8	27810.7	19747.2	16441.4	26955.7	26752	27995.8	26759.5	26443.9	15350.1	19362.7	15640.4	24649.2	20745.1	18869.6	16842.7	17077.1	23234.9	26748.2	18903.2	17959	23794.4	19542.5	20449.5	20661.4	23796.5	31346.6	24424.9	24637	27651.3	9560.11	29687.9	23718.5	20914.4	29049.4	18182.7	25463.4	22414.2	24307.1	28782.9	23463.5	22907.6	23068.9	21237.2	21258.9	26067.8	22389.4
MA0160.3	NR4A2	3529.63	6470.87	2102.07	2427.9	4950.79	2719.22	3001.2	2511.63	4493.94	2549.64	3668.61	4467.93	3779.55	3146.78	6438.68	2696.36	3568.49	3736.94	2803.17	2584.58	3490.33	2407.93	2544.43	2854.23	2354.7	2620.71	2408.78	2655.34	2234.9	2674.61	2405.17	1053.34	2859.78	3325.99	2729.6	3147.01	2833.98	2604.54	2988.56	2539.44	2844.03	3561.95	3379.96	2282.36	2359.06	4698.4	2689.57	3515.3
MA0161.3	NFIC	1780.38	2793.76	2877.84	1826.4	4295.01	2932.92	2855.96	3461.41	3625.95	2639.94	2672.39	2959.52	2814.27	2989.75	5408.67	3639.09	2607.74	3232.33	2718.09	3186.71	4555.7	3040.76	3432.29	3979.96	3359.45	3522.53	3260.26	3268.69	3013.89	3756	1877.5	1205.02	1777.53	4241.26	4834.7	2527.29	4605.83	2790.42	3801.47	2691.81	2216.02	4170.34	3770.78	3157.41	3421.41	3640.63	2731.37	3957.58
MA0162.5	EGR1	161755	149180	95428.3	92593	136666	127377	175153	150698	125543	120919	168976	158790	203354	114157	121952	175561	221509	165011	85352.7	154913	187471	98073	112000	131644	189907	106671	122549	111758	101154	110957	114532	27035.8	132354	60338.9	80266.9	80924.3	112198	116275	92060.1	133642	119447	70269.7	104767	121445	144204	126952	89175.1	63828.3
MA0163.1	PLAG1	544374	263256	120843	374929	323255	153815	192495	164778	288280	152208	317023	247005	429960	164708	178888	248524	405961	234196	76821.7	102384	321188	454769	451540	285342	502717	332999	480535	331192	297918	353137	615703	65318.1	638725	237061	293133	331080	271430	324491	248148	324481	490000	247740	254653	400282	454587	364600	386343	213159
MA0164.2	Nr2e3	0	0	0	0	0	0	0	0	0	0	0	0	0	0	0	0	0	0	0	0	0	0	0	0	0	0	0	0	0	0	0	0	0	0	0	0	0	0	0	0	0	0	0	0	0	0	0	0
MA0258.2	ESR2	10793	11186.3	9910.29	10918.1	9220.58	14956.2	14229.2	13884.6	14454.9	14141.2	6221.68	8310.57	7035.68	13703.7	16029.9	9030.82	6407.92	9756.35	12452.6	13615.7	11553.6	10890.3	16856	15382.9	15725.3	15717.7	16955.9	18988.7	23168.8	16242.4	13999.5	7405.65	15447.2	18981.3	15240.5	18451.2	17366	21666.1	17393.3	17088.1	18855.2	17853.9	19059.9	13836.7	16756.2	15416	18288.2	17707.9
MA0259.2	ARNT::HIF1A	0	0	0	0	0	0	0	0	0	0	0	0	0	0	0	0	0	0	0	0	0	0	0	0	0	0	0	0	0	0	0	0	0	0	0	0	0	0	0	0	0	0	0	0	0	0	0	0
MA0442.3	SOX10	0	0	0	0	0	0	0	0	0	0	0	0	0	0	0	0	0	0	0	0	0	0	0	0	0	0	0	0	0	0	0	0	0	0	0	0	0	0	0	0	0	0	0	0	0	0	0	0
MA0461.3	Atoh1	629.796	854.881	1075.32	1010.39	956.648	592.841	506.921	573.504	1045.88	569.461	626.768	488.271	416.298	534.854	1213.13	974.456	538.925	890.491	695.755	533.447	712.546	426.588	515.263	558.871	401.629	525.88	449.746	459.383	208.447	311.657	1987.95	108.678	1434.61	425.084	349.982	1367.74	478.812	825.396	355.406	671.798	2038.4	321.135	387.543	683.804	482.758	646.414	249.641	408.901
MA0462.3	BATF::JUN	489.649	788	620.048	832.649	637.765	1041.98	791.241	996.319	914.548	1109.88	323.447	367.449	995.707	787.515	804.217	547.202	292.127	729.578	771.53	857.668	473.498	611.678	483.374	532.923	494.313	643.225	468.952	641.117	581.288	603.164	558.343	282.444	498.653	674.007	685.652	573.725	486.103	551.002	624.416	706.427	575.15	679.098	760.369	535.857	613.271	450.531	528.652	684.284
MA0463.3	BCL6	1103.87	768.797	968.17	416.762	1135.01	972.514	1291.58	869.12	854.851	1180.67	1032.15	977.787	1069.96	1061.74	877.215	1703.07	1145.84	984.227	1098.57	769.426	1610.12	4928.68	810.658	1023.93	818.034	973.53	825.868	1848.89	935.864	1113.64	603.337	429.339	733.035	1271.42	1517.02	1028.83	1003.8	672.709	1299.88	777.993	653.388	1353.78	1105.4	1030.22	1100.24	1122.13	1169.13	1253.83
MA0464.3	BHLHE40	2638.57	2521.6	7688.21	1322.96	1122.4	1531.42	1652.02	1767.05	2392.03	1370.34	1963.68	2560.93	2508.74	2429.58	1742.06	1213.36	2379.83	1657.56	2325.1	1704.56	3029.47	1477.19	3116.75	3516.9	2416.49	2114.39	3285.87	2206.05	1497.81	2079.5	2034.99	630.573	3308.1	1692.68	2001.01	3655.38	4997.14	3992	1904.66	3451.33	3381.12	1780.97	2145.39	1777.17	2513.43	2375.78	1356.65	1587.62
MA0465.3	CDX2	737.069	631.725	1221.52	805.507	470.217	491.56	891.226	542.48	399.368	358.012	461.451	484.534	611.057	343.6	561.096	677.063	508.705	490.551	438.463	517.476	387.303	424.825	478.339	389.214	378.794	438.958	494.561	417.736	329.862	431.215	887.622	168.392	427.866	666.347	543.838	399.429	403.466	338.567	488.929	406.311	486.34	550.938	485.655	485.339	408.38	506.498	432.636	652.991
MA0466.4	CEBPB	212.816	227.792	274.783	331.834	365.724	217.41	151.418	260.16	152.823	216.44	702.958	251.609	187.456	431.727	181.258	366.784	227.91	235.902	239.381	229.59	320.646	165.7	253.436	227.54	130.294	108.653	243.279	152.707	110.671	159.859	259.742	50.1592	143.146	153.183	102.783	147.668	284.371	212.435	109.96	203.155	148.017	103.117	161.885	187.64	123.496	263.043	121.997	139.778
MA0467.3	Crx	0	0	0	0	0	0	0	0	0	0	0	0	0	0	0	0	0	0	0	0	0	0	0	0	0	0	0	0	0	0	0	0	0	0	0	0	0	0	0	0	0	0	0	0	0	0	0	0
MA0468.1	DUX4	761.292	597.953	653.86	780.116	945.839	504.816	381.836	510.569	340.269	607.576	506.015	388.624	435.774	693.763	436.133	468.889	468.411	429.623	545.926	457.982	389.602	532.354	409.525	333.327	307.602	369.42	299.297	412.688	650.055	415.095	1124.87	326.632	841.575	714.217	452.765	665.715	245.482	460.275	728.485	457.1	826.778	605.443	497.102	582.767	335.405	349.791	573.836	765.647
MA0469.4	E2F3	1001.79	456.245	536.232	879.053	661.186	684.048	525.025	433.452	361.76	402.933	307.634	565.497	384.65	553.605	293.848	680.037	399.157	396.815	365.96	410.467	328.691	555.27	976.818	347.298	218.948	249.902	960.312	594.422	763.948	548.087	3910.44	253.185	1972.59	875.06	664.836	1399.21	568.741	577.556	333.807	602.54	5131.95	1764.77	845.4	604.418	606.255	296.623	1975.67	730.181
MA0470.3	E2F4	1617.74	825.745	807.205	1958.61	1271.93	1002.74	1113	872.222	487.719	1038.64	587.955	832.053	758.344	1081.9	665.644	1315.47	681.211	728.016	734.159	870.844	1299.82	869.041	615.966	868.246	390.883	332.478	726.636	556.56	430.863	445.992	861.034	189.291	684.271	482.527	558.15	646.348	1361.09	568.705	343.625	754.907	892.328	309.35	505.278	532.249	555.733	565.263	645.001	448.54
MA0471.3	E2F6	17170.6	21851.4	32484.4	26076.5	49286.3	43839.5	49320.7	47823.3	41425.7	44909.8	69002	66020	75390.1	45448.1	42535.6	51017.7	74486.2	63748.3	43791.4	46682.2	51753.8	47871.3	42713.1	56108.7	59837.4	39947.3	44193.6	46392.6	51525.2	53879.1	42127.3	16320.9	46859.2	41016.8	47830.4	39197.3	68902.7	47687.1	53191.2	53792.3	46807.1	43702.4	57647.4	55696.7	50776.6	47773.1	48893.6	45006.3
MA0472.2	EGR2	6119.75	6023.23	11806.6	8383.4	11303.2	13681.5	19650.6	16437.9	11842	13328.6	10745.6	11997.5	11813.4	13382.1	11524.4	12544	13762.7	16997.5	15436.8	16310.1	19379	9503.04	14249.5	19885.8	20679.2	9194.21	16424.5	12029.8	17528.9	19220.6	12269.2	3817.48	15500.7	8063.19	13080.7	9942.14	24912.8	17176.2	15135.2	19918.5	15526.9	9638.47	17845	11197.1	16622.9	12122.4	14627.2	10164.1
MA0473.4	ELF1	9651.1	4845.21	16783.7	8908.73	6790.22	14853.4	12506	13992.3	13486	14282.4	6286.37	5956.41	5920.68	12863.2	11247.3	7381.28	6245.48	9653.24	10982.2	13019.5	10141.1	8475.35	9162.29	7335.18	6160.1	9359.36	8285.89	11167.8	7703.95	7936.51	8313.78	3391.12	7239.12	9794.16	11407.6	9407.15	7855.43	8917.82	9002.98	9569.08	8297.39	9137.62	8597.9	7965.69	8570.36	8478.94	7008.03	9680.12
MA0474.4	Erg	9358.7	5773.59	14214.9	8716.11	14212.8	13746.2	11791.3	12741.6	13293.2	12845.8	11294.8	9480.18	11376.4	14429.8	11237.4	10923.2	11557.9	12216.9	12137.6	11886.4	14411.8	10141.2	10275.1	9798.21	7000.97	10793.6	10041.7	11579.2	8389.47	8793.56	9890.64	3788.81	8400.02	10883.7	12052.9	11111.4	10120.7	10002.1	10139.9	10395.6	9610.5	10052.4	9476	9531.77	9401.16	11476	7803.27	10744.1
MA0475.3	FLI1	6573.06	909.18	2844.03	1006.01	1567.39	1257.27	1270.59	1243.18	1017.23	966.495	848.15	849.492	1536.16	1094.55	1368.41	1052.77	1179.84	1332.61	1550.98	1266.94	1346.94	787.954	352.46	720.544	445.956	358.555	512.166	724.412	1051.91	624.657	1979.76	263.933	1044.5	492.101	537.333	1021.57	580.894	909.485	541.946	1198.15	1361.75	883.858	709.678	696.434	526.263	657.607	815.57	477.747
MA0476.2	FOS	487.919	907.193	594.332	1465.67	711.631	1010.69	802.762	933.384	812.467	1074.49	360.823	450.903	357.87	769.234	725.651	596.768	334.939	817.065	848.339	852.477	501.081	557.032	501.836	548.891	545.356	647.571	523.37	697.909	593.108	583.014	609.473	292.596	556.855	647.2	703.867	675.398	542.005	568.705	718.667	747.981	549.776	682.044	811.061	597.201	634.322	548.473	530.912	715.578
MA0477.3	FOSL1	553.667	1297.88	753.868	1006.88	823.33	1211.14	996.56	1097.37	1137.81	1237.39	405.387	430.974	1082.13	927.674	922.375	676.072	365.159	884.242	948.913	1025.77	590.724	752.699	609.253	638.71	612.518	786.647	577.788	786.252	742.459	724.065	728.095	342.755	632.361	785.065	814.456	777.07	687.837	703.689	812.919	918.816	663.96	817.569	938.606	674.783	750.801	598.843	702.611	844.924
MA0478.2	FOSL2	4906.87	10619.5	2235.89	2482.19	1843.03	3073.97	2772.43	2768.68	3087.49	3089.61	1131.35	1192.03	1003.01	2233.64	2399.66	1707.03	1047.63	1963.77	2336.63	2664.84	1797.46	1729.27	1675.03	1475.02	1664.28	2133.94	1542.9	2069.75	2014.63	1978.75	1852.96	969.745	1788.54	2470.08	2603.4	1997.14	1378.1	1911.91	2289.52	2243.94	1771.97	2664.83	2362.87	1769.95	2015.23	1645.42	1985.83	2739.22
MA0479.2	FOXH1	808.007	1345.56	1184.85	2148.6	695.417	865.4	761.204	854.051	748.592	799.514	592.267	453.394	460.119	724.233	722.558	1610.88	502.409	640.529	829.222	876.035	636.694	514.726	409.525	425.141	374.764	549.784	406.532	523.747	1045.46	525.25	621.744	269.904	550.563	855.912	752.006	505.943	330.55	469.126	608.707	415.545	653.388	854.396	722.76	521.423	385.926	534.481	989.529	903.339
MA0480.3	Foxo1	3581.53	821.109	781.013	467.544	556.694	509.589	420.925	395.78	549.803	473.719	317.697	257.837	371.26	337.975	398.397	582.889	289.609	490.551	656.834	356.563	360.87	408.961	318.892	413.165	326.408	465.034	318.503	354.634	279.362	318.374	496.986	132.564	1278.88	382.958	333.068	801.278	549.297	440.359	349.516	554.06	759.114	346.178	469.303	409.561	467.321	391.766	316.288	337.97
MA0481.4	FOXP1	3581.53	821.109	781.013	467.544	556.694	509.589	420.925	395.78	549.803	473.719	317.697	257.837	371.26	337.975	398.397	582.889	289.609	490.551	656.834	356.563	360.87	408.961	318.892	413.165	326.408	465.034	318.503	354.634	279.362	318.374	496.986	132.564	1278.88	382.958	333.068	801.278	549.297	440.359	349.516	554.06	759.114	346.178	469.303	409.561	467.321	391.766	316.288	337.97
MA0482.3	GATA4	2308.1	966.79	1642.51	1255.54	1214.28	1147.5	874.768	925.406	1208.25	1018.68	1582.73	1269.26	1727.27	802.515	729.363	1125.13	1639.44	873.307	1504.48	876.434	711.397	796.768	869.402	906.169	752.215	806.205	830.67	801.396	606.001	706.602	1464.37	269.307	690.563	898.037	625.804	1099.03	741.308	913.911	712.777	838.016	858.496	928.051	712.948	866.032	746.591	920.651	875.439	851.183
MA0483.2	Gfi1B	1432.61	3023.54	2692.11	1969.99	3781.55	3405.39	2575.34	2547.53	2878.56	3250.69	1648.86	3363.09	1485.04	2525.21	3553.4	2318.67	1672.18	1934.08	1843.58	2491.15	2885.81	2115.31	2202.04	1700.56	1885.91	2494.67	2026.26	2455.93	3412.52	2251.45	2384.72	1369.23	2280.9	3303.02	2792.05	2612.02	1528.8	2608.96	2692.06	2571.76	2839.8	2999.23	2727.52	2056.83	1905.77	2249.86	2740.41	3605.01
MA0484.3	HNF4G	5171.59	3682.41	3236.44	2255.42	3590.58	3292.97	4985.27	4616.84	2617.09	3243.43	3119.47	3259.71	3344.99	2659.27	2780.73	2643.82	3146.67	2616.8	3321.02	4713.98	3770.75	1604.11	1737.13	1724.52	1560.85	1936.19	1590.92	2666.69	2780.73	2517.44	2511.52	935.111	2471.24	3144.09	2979.4	3769.15	1638.17	2974.08	2811.83	2733.36	3569.31	3295.32	2717.71	1730.26	1796.31	2028.79	3417.04	3181.5
MA0485.3	HOXC9	548.476	654.901	405.746	188.244	165.747	108.705	414.342	118.778	116.408	101.187	234.319	226.697	282.401	150.003	203.529	192.314	339.976	129.668	197.188	124.977	121.822	89.9008	154.411	123.75	99.3998	69.5379	142.446	150.183	179.437	84.631	351.776	38.8137	202.922	105.314	148.32	312.281	87.4986	92.9401	106.033	115.429	268.544	139.944	124.275	128.101	161.387	162.303	120.867	118.915
MA0486.2	HSF1	337.391	804.555	473.846	350.22	733.25	499.514	428.332	614.278	260.276	485.97	554.891	736.143	458.901	420.477	478.818	670.124	504.927	957.669	565.387	486.731	693.009	306.72	322.249	433.125	321.035	365.074	320.104	339.489	1478.47	1086.77	312.917	391.123	303.596	1164.19	1816.26	367.959	439.924	373.973	1307.74	313.967	389.072	1476.04	1144.64	407.757	376.102	405.758	1485.42	1214.19
MA0488.2	JUN	14087.4	1095.25	1577.26	4359.37	1372.82	1178.26	1238.5	956.874	1266.16	1090.82	1250.66	1250.57	1065.09	1298.93	1065.28	1012.13	958.228	1140.45	1081.18	887.614	1064.22	1519.5	1508.87	956.069	996.685	1006.13	1672.54	1857.72	1698.74	1458.88	1877.5	687.898	1700.45	1702.25	2301.55	4618.85	1280.88	1971.66	1651.36	1803	2192.76	2093.27	1803.63	1445.19	1198.48	948.634	1870.62	1785.81
MA0489.3	Jun	667.861	1325.69	880.068	1294.06	965.656	1434.38	1151.27	1388.55	1244.67	1457	478.701	563.006	1142.99	1153.15	1140.13	789.081	424.34	1074.84	1133.87	1222.22	698.755	876.092	731.774	778.428	742.812	934.415	734.639	974.296	896.108	874.52	832.401	416.202	762.923	988.033	984.894	898.109	763.183	845.312	970.005	1085.03	843.694	1019.38	1156.09	799.275	913.592	649.212	790.719	1047.29
MA0490.3	JUNB	545.016	1234.31	772.441	1422.77	828.735	1172.96	926.612	1049.5	1111.55	1198.36	487.327	493.253	1102.82	872.829	890.824	645.342	411.749	829.563	923.081	968.67	560.843	717.444	557.223	608.77	580.28	762.743	529.772	749.653	689.81	682.422	687.191	320.661	630.788	742.939	771.522	718.972	641.657	697.051	765.793	844.942	647.044	785.161	889.55	618.852	710.104	618.431	659.686	809.458
MA0491.3	JUND	532.904	1245.57	766.25	806.382	852.155	1187.27	936.075	1055.71	1113.93	1205.17	483.014	422.255	1099.17	869.548	889.587	639.394	390.343	820.189	958.213	981.846	553.947	705.104	558.901	608.77	574.907	762.743	528.172	744.605	687.661	671.675	685.146	318.869	594.608	746.769	771.522	714.13	644.087	674.922	763.829	833.399	640.7	783.688	876.469	615.244	701.683	579.254	664.204	819.889
MA0492.2	JUND	15227.6	1094.59	1896.81	5069.44	1464.7	1166.59	1476.32	1008.73	1256.01	1084.02	1338.35	1241.85	956.755	1282.52	1030.02	1044.84	928.008	1224.82	1143.17	924.349	1105.6	1903.78	1463.55	922.137	960.417	893.127	1637.33	1409.7	1665.43	1328.57	2576.97	607.882	2197.53	1560.56	2807.66	4737.47	1110.75	1852.16	1509.99	1595.23	2825	1895.88	1718.6	1273.79	1056.74	884.272	1777.99	1633.52
MA0493.3	KLF1	282522	301700	233991	196965	322727	165201	201960	187433	157268	158377	380428	416103	425673	168207	157849	366474	441693	360313	40340.5	186154	359989	210202	221457	219590	282245	237709	231072	215418	237721	237861	237578	71141.9	260012	186217	220370	228713	156008	246650	216835	270388	250998	196698	231075	221672	269121	260172	218222	179278
MA0494.2	Nr1h3::Rxra	8343.07	4845.87	11290.4	13764.5	4233.75	8564.38	6945.88	7690	7358.17	8667.15	3878.49	4931.29	4732.65	6798.88	6641.59	5048.73	4164.07	5099.24	7624.54	7393.19	5648.65	6178.48	8272.74	5764.36	6169.51	6054.14	8734.04	10734.9	13011.8	10200.1	26119.4	4735.27	17975.1	11389.2	11829.1	17388.5	8992.92	13002.8	9328.93	8172.39	22335.7	12080.9	9912.6	9668.89	8479.14	6923.07	16875.1	10345.6
MA0495.4	MAFF	664.4	1152.2	754.344	872.924	953.045	1024.48	634.062	774.274	1177.21	890.718	439.888	849.492	488.115	687.67	846.902	969.499	472.189	738.952	719.004	772.62	714.845	616.966	681.423	678.629	605.802	843.146	659.414	754.701	1001.41	754.962	850.808	585.788	666.968	955.481	1118.9	1253.96	573.602	661.645	911.097	833.399	951.535	773.376	734.206	629.678	637.129	730.364	747.794	986.788
MA0496.4	MAFK	3117.84	3155.97	2021.58	2109.2	2203.35	4789.39	4499.74	4445.32	4061.14	4433.63	1771.05	2006.64	2876.35	3892.58	4364.42	2753.85	1911.42	2144.99	2444.1	4000.85	2274.4	3113.04	5404.39	2664.62	2581.71	3946.27	3265.06	2985.99	6873.39	3387.93	2474.71	1490.45	3087.87	4193.39	3789.95	2883.15	2284.69	3387.89	3652.24	3539.06	2710.82	3993.57	3965.37	2751.46	3139.33	2803.93	2872.57	4176.64
MA0497.2	MEF2C	1141.94	2666.62	2077.78	1048.91	3469.88	1799.2	2413.22	1713.42	1316.9	1955.68	1427.48	1253.06	1347.49	1102.05	942.789	1984.6	1338.5	1326.36	1128.71	1750.07	1074.57	1845.61	1460.19	1562.84	1118.92	1238.64	1406.86	1486.68	3427.56	2188.32	2617.87	921.974	2693.04	2336.05	1937.26	1408.89	1120.47	1042.26	1396.1	953.445	1674.7	3810.9	2218.97	1766.34	1169	1432.74	5933.78	2305.29
MA0498.3	MEIS1	0	0	0	0	0	0	0	0	0	0	0	0	0	0	0	0	0	0	0	0	0	0	0	0	0	0	0	0	0	0	0	0	0	0	0	0	0	0	0	0	0	0	0	0	0	0	0	0
MA0499.3	MYOD1	7901.86	9541.42	7880.13	15229.3	8283.74	12211	10897.6	13234.9	20733.1	12441	11992	9492.63	8104.42	14287.8	15389.6	9205.29	8250.08	8822.11	15563.2	12828.3	13155.7	13416.4	12539.2	12323.1	10739.2	13060.1	12173.6	10323.5	15198.4	14838.6	9127.78	6487.26	10492.2	16685.5	12240.3	11416.4	11819.6	14133.5	15031.1	13412.9	11746.2	16606.2	14867.3	8001.78	12480.1	11414.4	13177.9	16291.4
MA0500.3	MYOG	6637.08	13402.6	7551.06	14420.3	13883.1	16755.5	15079.2	17051.8	22496	17108.3	15030.9	7879.6	6064.32	24330.5	19448.4	10238.2	6028.91	10470.3	14702.1	16560	16048.4	12646	21050.3	18754.1	18778.5	23208.3	20000.1	17105.7	21119.8	19594.1	17298.4	10507.2	20160	28074.7	18115.8	31678.3	17524	25222.2	25408.6	24706.5	22261.7	24052.7	22304.2	12741.5	20980.3	18497	19598.5	27175.3
MA0501.2	MAF::NFE2	986.219	978.709	1093.89	1040.15	873.775	1274.24	1466.86	1229	1201.09	1188.83	865.4	1238.12	797.296	1098.3	990.424	841.621	809.646	1810.67	977.845	1101.63	799.891	1228.64	1047.31	886.21	3523.32	1334.26	961.912	1203.99	1283.99	1213.04	967.385	567.277	976.856	1336.52	1738.2	1244.28	1300.33	1367.55	1297.92	1368.99	1146.07	1322.84	1456.97	1048.26	1284.08	1071.76	1172.52	1481.22
MA0502.3	NFYB	16850.5	7411.84	6984.35	9244.94	7797.31	9397.43	9041.87	11389.4	8739.54	8820.06	6434.44	7513.39	5846.43	8722.67	14850.8	6659.61	6266.89	6738.05	8940.45	11490.7	9489.51	6640.32	4837.1	5225.44	4372.25	5391.36	4684.72	6038.87	5815.03	6806.75	6610.12	1774.08	5275.97	5441.84	6926.78	5894.6	6448.16	5757.86	5849.48	5732.21	6049.65	5771.59	5775.54	8108.23	5352.44	5677.81	5329.45	5599.45
MA0504.2	NR2C2	118329	122181	112353	91000.4	134590	119025	138914	139487	119843	115765	110889	108660	140457	127394	120276	110458	139837	99913.1	59079.2	147589	112949	88677.4	107076	99598.8	118553	87148.3	104320	96817.5	70106	84318	100716	32786.2	119655	68823.4	76597.9	86194.3	64420.9	91096.8	69323.9	90584.2	95288.8	69496.3	72647.1	97307.7	96123.6	125259	75825.5	64180.9
MA0505.3	Nr5a2	2861.76	2915.6	3454.55	1662.67	7604.54	3265.4	2865.83	2893.22	3544.77	3792.47	3297.72	3880.01	3469.15	2866.93	9978.47	3078.01	3438.79	3193.27	3715.05	2754.28	3329.43	2598.31	3036.19	2742.46	2646.18	3318.26	2920.95	18578.5	3409.29	4001.84	2836.71	1627.79	2409.89	4876.97	5880.74	3427.82	3339.53	3644.58	4390.55	3111.97	3664.47	4762.52	4362.72	3206.12	3278.27	3195.69	4190.81	6100.14
MA0506.3	Nrf1	4022.73	3224.84	6983.4	7427.3	6280.37	11017.9	12880.8	12664.9	14532.5	11201.4	11953.2	14021.6	15718.3	15750.3	11431	10541.6	13657	19212.7	9616.05	12686.1	22310.7	16862.6	20912.6	33801.7	25865.5	14090.1	22949.9	12910.7	23105.4	22173.3	10404	5539.61	17275.1	11345.1	14756.5	8932.68	44325.3	19570.5	19192	22257.1	16780.9	12456.5	21802.2	21800.6	23086.8	16213.5	18410.2	14914.5
MA0507.3	POU2F2	359.883	380.756	423.842	514.824	531.471	265.135	222.189	247.307	333.702	201.013	336.385	277.766	402.908	216.098	270.341	656.246	308.497	362.446	505.628	235.978	357.422	239.735	243.365	235.524	214.919	273.805	211.269	172.9	197.703	165.232	773.09	65.6847	677.979	258.497	153.524	254.182	218.747	230.137	257.228	233.167	289.69	235.696	210.941	196.661	186.648	221.068	352.435	275.383
MA0508.4	PRDM1	2863.5	7144.98	6362.4	2919.09	8635.06	5718.42	4236	4389.03	4958.97	6548.57	12338.4	9361.85	12543.7	6261.22	4460.93	7384.25	13573.9	7864.45	4927.98	4186.92	6657.71	5355.27	4691.08	6015.85	4438.07	6432.25	4627.1	5067.1	2703.37	4552.61	4407.43	1640.33	4317.99	4425.08	6211.2	6139.1	4698.19	4512.02	4235.42	4938.06	4550.45	4344.16	4004.61	5087.94	6274.45	6967.84	3053.31	4625.18
MA0509.3	RFX1	1077.92	899.909	864.352	1000.75	1297.15	878.656	854.606	933.827	1612.99	858.502	590.83	743.617	598.885	924.393	1502.65	1448.3	623.289	1040.47	1617.29	892.406	1264.19	1420.79	1497.12	1373.23	1263.99	993.087	1494.89	1803.46	1453.76	1299.02	1967.49	436.505	2117.31	2004.79	1095.48	2464.35	2107.26	2204.01	1301.85	1592.92	3161.21	3162.74	1304.89	1721.24	1359.86	1066.16	1564.49	1510.43
MA0510.3	RFX5	1192.11	1452.17	997.22	1270.42	1502.53	1317.19	1322.85	1809.6	2052.96	1257.35	681.395	737.389	725.478	1239.87	2173.24	1908.27	839.866	1366.98	2014.24	1471.37	1496.35	1681.67	1774.05	1632.7	1558.16	1355.99	1699.75	2004.12	1915.78	1740.98	1916.36	601.911	1810.57	2573.48	1636.72	2411.1	2326.01	2292.52	1790.78	1793.77	2753.11	3535.43	1728.41	1901.66	1595.63	1421.55	1772.34	2096.66
MA0511.2	RUNX2	882.406	1108.5	2104.45	941.217	774.687	1133.19	1126.17	813.719	897.833	879.375	1086.78	1074.94	690.178	809.078	1008.98	891.186	742.91	659.276	1110.97	819.736	994.117	1078.81	1030.53	993.992	1176.68	1082.18	971.515	1055.07	1180.84	992.735	1323.25	563.097	1079.1	934.418	748.103	1161.97	870.125	1159.54	877.717	1105.81	1224.31	958.986	1022	1205.23	1079.19	1066.16	948.863	1283.03
MA0512.2	Rxra	9222.01	7958.8	8852.59	7566.51	6525.39	11580	9920.34	10696.7	12506.4	11708.7	7912.23	13366.4	8084.94	9298.77	11880.8	7450.67	8039.8	6942.71	9079.77	10365.1	7020.88	5993.39	7112.98	6139.6	5747.73	6942.92	6872.63	20838.8	8210.03	7928.45	9070.51	3262.74	8469.23	9365.25	8463.32	10196.3	5777.34	8450.91	7820.91	7295.12	9103.02	8680.96	8440.92	7566.96	8212.5	8649.64	10635.2	8522.26
MA0514.3	Sox3	2122.97	2542.79	2539.24	3695.7	2125.88	1930.18	1756.94	1751.09	1767.61	1757.84	1677.61	1593.11	1317.06	1817.85	4889.64	2095.63	1377.53	2148.12	4384.8	1692.58	1718.16	2764.01	1569.29	792.399	1081.31	1301.66	1653.34	1775.69	2764.61	2015.02	6213.35	908.24	5208.33	3061.75	2801.16	5947.86	1951.71	6514.66	1843.79	2264.72	6635.37	2446.81	1921.36	2726.2	1316.36	1183.69	2773.17	3269.13
MA0515.1	Sox6	2967.31	4086.34	3344.07	2808.77	3417.63	3566.06	3680.11	3404.24	3064.21	3030.17	3211.47	2512.35	2729.06	3676.01	3298.53	3546.9	2940.16	3980.65	4859.78	3260.97	3294.95	4098.42	3534.67	2359.23	2581.71	3037.94	3593.17	3656.13	4900.66	4638.59	6104.96	1774.68	5139.11	5782.67	4787.86	6470.74	3252.03	7981.78	4286.48	4106.97	6783.39	4593.12	4567.12	4411.35	3497.19	3240.47	4998.48	6306.68
MA0516.3	SP2	149277	205757	194990	144454	311069	255986	86837.3	154163	240167	121774	336081	353559	387836	147672	234120	288699	388822	333733	47422.2	152109	273782	238609	203918	212900	245010	195343	214796	204195	228676	208836	197758	60780.4	216587	160605	195602	194263	187592	215344	187242	236219	219614	170875	202078	203011	233440	228125	183657	160748
MA0517.2	STAT1::STAT2	2654.14	6058.99	4730.36	3242.17	6381.26	4216.7	3202.41	3080.26	4234.26	3554.25	6545.13	4332.16	6676.59	4533.84	3291.1	5019.98	6664.79	5945.98	3473.09	3062.93	4888.99	5050.31	6372.82	5007.88	4479.71	8379.31	6781.4	4316.18	5234.82	5616.54	6653.07	9507.56	6866.31	7925.32	6340.01	5226.46	5881.85	5514.45	6305.03	4612.55	5916.43	7453.87	4802.59	5714.01	3834	6564.88	6887.16	7522.95
MA0518.2	Stat4	2079.71	1863.39	1540.12	2692.32	2832.11	2343.26	2522.26	2150.86	2488.14	2339.1	2344.63	2112.52	3069.89	3701.32	2333.47	2751.87	2799.13	2252.79	1917.11	1935.74	3086.93	3356.3	2190.29	2343.27	2090.08	2364.29	2093.48	2757.56	3175.06	3202.54	1767.06	1482.09	1678.43	3550.02	4690.28	2587.81	2464.54	2073.45	3485.34	2313.2	1896.73	3790.28	3227.89	1975.64	2061.55	2616.44	3025.07	4028.51
MA0519.2	Stat5a::Stat5b	2026.07	1831.6	2185.41	66342.2	3399.61	3429.25	2768.31	2709.74	2320.4	3360.5	2666.64	2411.46	2928.69	3228.34	2259.85	3269.33	2846.98	2830.83	2604.77	2633.7	5540.62	2776.35	2252.39	2265.42	2033.67	2357.77	2035.86	2635.14	4715.85	4192.59	1736.38	2181.33	2859.78	4758.26	7451.1	2507.93	2518.02	2396.53	4310.04	2437.86	2304.83	5232.44	4097.82	2118.17	2231.35	2733.97	4965.72	5138.39
MA0520.2	Stat6	733.608	930.37	1929.2	1230.15	1289.94	1633.76	1061.98	1529.93	1080.5	1761.02	1085.34	993.98	978.665	1118.46	893.918	2982.85	1035.04	1235.75	1062.06	1692.58	1935.37	717.444	785.483	928.125	873.107	958.319	702.628	971.772	1236.72	1119.01	578.795	546.974	2022.93	1713.74	3106.9	823.065	918.736	840.887	1415.74	928.051	955.764	1725	1378.48	752.365	732.558	1013	1448.15	1879.7
MA0521.3	Tcf12	0	0	0	0	0	0	0	0	0	0	0	0	0	0	0	0	0	0	0	0	0	0	0	0	0	0	0	0	0	0	0	0	0	0	0	0	0	0	0	0	0	0	0	0	0	0	0	0
MA0522.4	TCF3	6688.99	5020.02	11329.9	8560.26	4725.59	10804.8	9725.72	11186.4	16737.1	10721.7	8375.12	23574	8295.53	12218.2	11497.8	11780.7	8835.6	7714.47	11848.8	10733.6	12483.4	7049.28	12114.6	11758.2	10438.3	11119.5	11752.6	9599.09	8781.65	10656.8	8047.91	4390.72	8724.06	11431.3	10282.2	9879.2	12349.5	13106.8	11453.5	12505.6	9591.47	10867	11642.6	7619.28	10311.9	9928.47	8617.71	11128
MA0523.2	TCF7L2	1750.97	1103.86	1151.52	643.53	1293.55	790.632	804.819	823.913	863.209	772.289	980.403	868.176	1090.65	1095.49	817.826	1193.54	1124.44	1420.1	1275.09	809.354	1806.65	890.194	637.785	840.303	686.396	782.301	624.203	898.573	541.533	686.452	813.994	266.322	583.597	857.827	961.475	1019.15	685.406	705.902	771.684	715.661	767.572	777.795	719.489	2507.88	732.558	1018.59	1473	897.08
MA0524.3	TFAP2C	30946.5	39559.6	86081.9	83140.6	34378.1	68542.1	72504.5	71058.6	53847.9	73656.9	27342	58771.9	33012.9	70328.4	72475.4	31196.5	33229.5	37897.4	51430.7	73723.5	66480.6	58026.6	101213	100182	94298.2	66567.3	110610	78659.3	84824.1	88896.1	45278.9	25703.6	57354.5	63169	72247.2	45609.9	112049	74648.6	81282.1	79022.8	56582.5	68129.3	90495.4	74076.4	90268.8	63953	77192.3	63644.7
MA0525.2	TP63	636.717	336.39	431.462	584.868	286.454	482.015	444.379	436.998	677.553	434.242	431.262	352.502	329.873	576.105	442.938	378.68	339.976	401.502	613.091	440.014	632.097	703.341	607.574	676.633	668.934	619.322	561.783	829.161	633.938	667.645	437.675	268.71	552.136	568.693	625.804	1343.53	1502.06	1073.24	592.999	660.255	1262.37	586.293	626.283	994.133	872.894	847.894	761.35	523.644
MA0526.5	USF2	4273.62	2365.99	8884.49	960.479	1367.41	1696.33	2040.85	1732.03	2591.42	1333.58	2576.07	2939.59	3537.32	2633.02	2098.39	1703.07	3135.33	1668.5	2371.77	1738.89	2339.91	1473.67	2343.02	2912.12	2134.41	1760.18	2533.62	2347.4	1960.91	1968.01	2245.64	613.853	3573.94	1510.77	2227.39	4260.57	3791.61	3859.23	2101.02	3384.38	3865.35	1845.79	2142.12	1692.37	3024.26	1944.84	1295.65	1917.25
MA0527.2	ZBTB33	1012.17	291.361	1856.33	529.708	2044.81	2071.76	2054.02	2166.82	1339.59	4685.91	1456.23	1390.08	2054.71	1509.87	1597.92	2661.66	2679.51	1823.16	1078.59	2257.57	3632.84	3708.85	3596.77	8874.07	4366.88	3046.63	4495.86	2324.68	4590.14	4116.02	2137.25	1067.08	3163.38	1782.67	3400.94	1965.67	11931.4	4078.3	3667.95	4402.47	3412.84	2803.3	4200.84	3873.69	4393.94	3749.76	3558.24	1819.19
MA0528.3	ZNF263	52366.5	50843.2	54938.5	57251.4	66698.7	72837.3	70145.6	76249.9	80440.2	71838.7	84395.2	78808.4	81693	94341.5	69225.1	64342.8	88648.1	59286.4	78692.4	73008.4	60999.7	81206.9	76853.1	80222	70459.7	82367.6	75411.7	74957.7	64088.9	70928.8	61929	27489.6	61295	76400.2	72316.2	70950.6	78700.2	71973.3	74311.4	74110.2	65526.9	70262.3	69546.8	82935.2	73238.9	85970.3	57603.9	76147.5
MA0591.2	Bach1::Mafk	1828.83	1701.82	2111.59	2051.42	1628.64	2810.43	3110.24	2686.25	3040.33	2588.21	1763.86	2158.61	1618.94	2715.52	2115.71	1829.95	1582.78	2560.55	2972.63	2599.36	1862.96	2684.68	3086.54	2197.56	4964.62	2842.36	2319.15	2371.38	2440.12	2585.95	2020.67	1094.55	2301.35	3078.99	2271.63	2495.82	2391.63	2861.23	2980.7	2927.28	2345.01	3121.49	2869.78	2186.73	2645.35	2224.67	2162.05	3141.87
MA0592.4	ESRRA	2564.17	2207.06	1543.93	1321.21	2534.85	1816.7	1704.27	1762.62	3694.01	1615.82	2233.94	3609.72	2083.92	1775.19	2646.49	2176.91	2334.5	2388.7	2627.51	1640.27	2328.42	2062.43	2341.34	2073.81	1966.5	3852.83	2155.9	16867.2	2449.79	2431.46	2114.75	1173.96	2095.29	2960.27	4055.37	2704.01	2384.34	2940.89	2908.05	2398.62	2858.83	3183.36	2820.72	2498.86	2382.92	2336.61	2739.28	3237.83
MA0593.2	FOXP2	4000.24	2444.79	1289.15	1217.89	882.783	771.542	982.159	643.973	841.121	722.83	564.954	439.693	629.316	488.447	658.839	1027	564.108	779.571	890.532	581.761	618.306	847.888	540.439	636.714	576.25	751.878	545.777	605.78	537.235	565.55	758.773	232.882	862.024	752.513	606.288	869.06	743.738	590.833	685.287	646.404	797.175	659.947	941.877	626.069	701.683	727.566	564.799	690.543
MA0594.3	HOXA9	233.578	117.207	550.995	52.5331	72.0639	54.0875	47.3181	62.9347	32.236	44.4679	115.003	139.506	692.613	76.8765	38.9736	65.4263	163.692	54.6793	133.123	56.6987	59.7619	29.9669	60.4217	73.8508	52.3864	117.345	62.4203	53.0057	20.4149	30.897	192.25	13.1369	99.1013	42.1254	63.7514	191.242	68.0545	57.5343	35.3443	64.6403	69.7792	58.9239	39.2449	34.2804	49.1178	64.3616	27.1104	41.7246
MA0595.1	SREBF1	5984.79	7439.65	4362.72	3457.55	4004.95	7388.24	6624.94	6351.09	6607.79	7221.04	4902.02	5662.45	4352.87	5649.02	5630.75	4455.93	4612.34	4791.47	5337.85	6175.37	4725.79	5859.42	6196.59	4963.97	5809.52	6969	5821.09	8343.36	6260.94	6681.82	11342.7	2948.05	9944.74	7869.79	8675.39	12072.4	4498.89	8962.08	7730.58	8581.01	9900.19	7349.28	7358.41	7164.61	6576.18	5605.05	6374.33	7806.68
MA0596.1	SREBF2	4469.13	7158.22	4594.16	3595.89	4071.61	7286.96	6025.03	6800.5	7236.39	7225.12	5258.53	6002.49	4505.03	5349.95	6045.23	4759.27	4750.85	4394.65	5496.81	6953.18	4997.02	6437.6	6325.82	4822.26	5758.47	7251.49	5875.51	8545.28	6263.09	6634.8	12453.3	3151.07	10152.4	7969.36	8354.03	12266.1	4484.3	8820.46	7685.42	8608.71	10115.9	7523.11	7358.41	7718.51	6604.24	5960.44	6939.13	7925.6
MA0597.3	THAP1	12409.1	25782.8	29955.2	41530.9	17657.5	39150.8	32788.6	36523.4	46427.6	39114.9	19717.3	24445.9	18509.4	39603.1	68542.1	27657.5	19463	26931.9	32156.1	36064	36341	28651.9	36798.5	39113	34266.1	44267.4	36194.2	42347.8	37783.8	35374.4	23781.7	17270.9	28151.1	45970.3	37357	32624.9	41894.8	35076	40514.4	37235.1	29772.5	43366.5	41169.5	32456.4	39669	36378.3	33673.3	47399.2
MA0598.4	EHF	8664.88	4007.54	9957.91	6619.17	6347.03	10858.3	9478.43	10150.2	8821.33	9919.96	6279.18	5637.54	5977.89	10078.8	7752.03	6746.84	6080.53	7964.43	8591.71	9331.73	8643.65	6620.93	6204.98	5782.32	4049.87	5521.74	5491.38	7056.07	5587.25	5553.41	6393.33	2393.91	5436.42	6791.77	7350.92	6879.86	6156.5	6412.87	6257.9	6556.38	6034.85	6410.92	5942.33	5769.94	5104.05	6377.39	5112.56	6805.29
MA0599.1	KLF5	229856	285781	226579	188827	334382	171779	149317	201591	165970	179033	438263	455928	478253	174259	157236	332153	499092	375519	42957.3	74169.9	338215	263748	237904	238131	275989	246142	243191	242591	238250	240466	247417	75715.9	266863	209321	239176	242298	175172	248090	225192	265725	253692	212004	234511	233190	268168	282074	217669	202269
MA0600.3	RFX2	910.09	762.837	763.392	928.084	1318.77	796.995	788.772	951.112	1508.53	760.037	540.516	751.09	574.54	859.235	1091.88	1350.16	581.736	992.039	1460.91	909.575	1089.51	1288.58	1287.32	1167.64	1071.91	877.915	1237.2	1544.74	1275.4	1180.8	1814.1	415.605	1769.67	2012.45	1068.16	2336.05	1805.87	1967.23	1215.45	1454.41	2968.79	3021.32	1180.62	1548.03	1181.63	1026.99	1469.61	1518.78
MA0601.2	Arid3b	0	0	0	0	0	0	0	0	0	0	0	0	0	0	0	0	0	0	0	0	0	0	0	0	0	0	0	0	0	0	0	0	0	0	0	0	0	0	0	0	0	0	0	0	0	0	0	0
MA0602.2	Arid5a	285.484	473.462	743.867	862.418	318.883	152.718	158.824	179.94	157.001	167.889	307.634	208.013	255.621	264.38	167.648	532.332	271.981	260.898	210.793	155.322	221.809	123.393	203.084	141.714	123.578	104.307	232.075	185.52	92.4045	96.7212	531.755	51.3535	184.045	97.6544	117.094	268.707	128.817	121.707	125.669	173.144	367.927	100.171	88.3009	178.619	96.8323	145.513	93.7567	114.743
MA0603.2	Arntl	3091.88	2495.11	5917.12	1521.71	1059.34	1532.48	1743.77	1716.52	2186.08	1343.56	1336.91	1691.51	1684.67	2325.98	1742.06	1220.3	1553.82	1724.74	2225.55	1634.68	2667.45	1560.04	3121.79	3447.04	2523.95	2110.04	3279.47	2742.42	1794.37	2305.19	2155.65	751.194	3459.11	1935.85	2270.33	4483.28	5507.55	4585.04	2159.93	3555.22	4083.14	2053.5	2415.19	1867.38	2773.05	2451.34	1693.27	1742
MA0604.1	Atf1	3884.32	446.975	732.438	692.561	531.471	450.729	931.138	504.364	431.604	392.951	349.323	982.77	391.953	1161.59	445.412	784.125	361.382	565.54	392.654	398.089	494.185	586.999	901.291	862.258	875.793	656.264	1081.95	916.242	551.203	760.336	754.683	235.271	992.586	440.402	856.09	2425.62	1606.57	1358.7	693.141	1101.19	1061.49	490.541	755.464	779.429	951.483	733.162	712.777	415.16
MA0605.3	ATF3	16116.9	580.736	1149.61	6326.73	1162.03	541.935	987.508	555.776	641.139	515.918	947.34	607.847	528.284	1140.49	401.49	708.785	518.778	703.019	588.292	541.832	386.154	710.393	741.845	516.956	644.756	456.342	942.706	723.15	1058.35	835.563	840.582	353.503	877.755	712.303	2330.18	2933.99	964.915	1075.45	971.968	960.371	1105.9	1026.75	1093.95	725.302	665.196	478.514	1275.32	786.51
MA0606.3	Nfat5	2936.16	12298.1	3445.5	2100.45	7363.13	2909.06	2579.04	2698.66	2829.01	2492.47	5021.33	3947.27	5144.08	3291.16	2798.67	4320.12	4943.5	3649.45	2831.76	2686	4032.78	3511.42	3761.25	3738.45	3000.8	3374.76	3447.52	3839.13	4138.86	4146.92	3325.51	2036.82	3229.44	6148.4	7719.12	3812.73	3582.58	3425.51	4451.42	3319.74	3859	5513.8	4868	3686.05	2788.49	4468.93	4803.05	6039.64
MA0607.2	BHLHA15	2463.82	6159.64	1705.85	2113.58	1693.5	1288.55	1054.16	1139.92	2006.99	1128.94	1285.16	1195.77	910.5	1151.27	2483.17	1871.59	1092.96	1627.88	1610.22	1102.83	1452.67	987.146	1137.94	1105.77	894.599	995.261	1059.54	1050.02	524.342	738.842	6008.83	244.825	3271.92	915.27	762.414	3606.96	1098.59	1858.8	832.554	1597.54	5603.48	742.441	811.061	1540.82	1004.81	1259.25	533.171	880.39
MA0608.1	Creb3l2	4261.5	1413.77	2107.31	646.157	969.259	1220.15	1914.94	1269.77	1254.22	976.478	1127.03	1656.63	1522.77	1901.76	1683.91	1060.7	1289.39	1296.68	1594.21	1192.67	1717.01	1323.83	2440.37	2459.03	2044.41	1794.95	2448.8	2693.2	1583.77	2041.89	1961.36	618.033	2998.21	1434.18	1922.95	4568.01	4007.92	3792.84	1869.32	3028.86	3880.15	1595.36	1924.63	1591.33	2968.12	1961.63	1398.44	1516.69
MA0609.3	CREM	24648.6	788	1642.98	6006.28	1325.98	1098.72	1739.66	1045.96	1067.37	1003.7	1152.91	911.771	849.637	1609.72	873.503	1800.22	833.571	1993.45	985.078	975.857	1091.8	1325.6	1755.59	1329.31	1423.84	1186.49	2064.67	1617.94	1753.54	1547.54	1578.9	592.357	1972.59	1397.8	3122.52	4880.29	2031.91	2252.69	1743.65	2008.47	2410.56	1879.67	1998.22	1400.09	1456.69	1281.64	2031.02	1431.16
MA0610.2	DMRT3	439.473	368.837	811.015	3867.31	327.891	331.949	269.096	338.607	342.06	272.706	260.195	211.75	205.714	295.318	290.755	264.679	230.428	312.453	298.623	308.249	257.436	234.447	240.009	229.536	217.605	412.881	195.263	285.221	182.66	181.352	327.234	83.0016	158.877	275.73	554.247	321.964	153.123	236.776	215.993	242.401	251.628	327.027	233.834	276.048	312.951	296.623	166.051	248.262
MA0611.3	Dux	197.244	280.766	304.785	295.936	956.648	453.38	268.685	331.959	235.8	715.116	254.445	212.996	226.408	184.691	237.553	301.358	195.171	285.895	409.359	283.094	206.868	167.462	129.235	147.702	116.862	176.018	136.044	194.354	238.532	132.992	200.431	111.067	117.978	298.707	145.717	140.405	167.706	110.643	269.009	140.824	188.192	216.545	214.212	294.09	159.984	148.311	159.273	206.537
MA0612.3	EMX1	0	0	0	0	0	0	0	0	0	0	0	0	0	0	0	0	0	0	0	0	0	0	0	0	0	0	0	0	0	0	0	0	0	0	0	0	0	0	0	0	0	0	0	0	0	0	0	0
MA0613.1	FOXG1	3322	754.229	637.192	537.588	466.614	414.671	320.94	322.651	348.627	388.867	241.507	200.54	320.136	272.818	321.687	496.645	243.02	362.446	504.767	298.666	289.616	319.06	292.038	349.294	288.797	428.092	297.697	309.2	248.203	317.03	370.183	123.01	567.866	394.447	355.186	227.553	311.106	292.097	353.443	233.167	260.086	377.113	495.466	351.825	412.59	414.153	255.289	371.349
MA0614.1	Foxj2	3510.59	727.079	579.568	524.455	421.574	293.239	309.419	309.798	324.151	321.711	280.321	237.907	295.791	280.787	289.518	558.106	319.829	371.819	486.512	297.469	273.526	264.414	226.582	267.46	220.292	365.074	235.276	267.553	208.447	256.58	355.867	83.0016	572.585	314.026	316.155	208.187	228.469	314.226	265.082	182.378	287.575	284.308	421.882	281.46	355.052	335.8	204.457	315.021
MA0615.2	Gmeb1	0	0	0	0	0	0	0	0	0	0	0	0	0	0	0	0	0	0	0	0	0	0	0	0	0	0	0	0	0	0	0	0	0	0	0	0	0	0	0	0	0	0	0	0	0	0	0	0
MA0616.3	HES2	2775.25	3271.19	4427.48	1885.06	2201.55	2662.48	3134.93	2837.82	3420.6	2200.71	2929.71	3645.84	3963.35	4315.4	2797.44	3043.32	3576.04	3115.16	3328.08	2694.79	6335.91	2816.89	5850.84	9213.39	5180.88	3537.74	6402.08	4096.59	3932.56	4799.79	3337.79	1164.41	5326.3	2596.46	3562.27	5807.45	15042.5	7904.33	3950.71	6877.27	6453.52	2722.28	4166.5	3464.13	5854.85	4885.88	3415.91	2805.98
MA0618.2	LBX1	503.491	262.225	550.042	882.555	304.47	255.59	269.507	233.568	525.925	202.374	544.828	539.34	617.143	215.629	243.739	290.453	590.551	287.457	241.792	218.809	211.465	190.378	528.69	231.532	220.292	193.402	622.602	374.826	336.309	317.03	1642.3	139.132	884.047	434.658	255.006	842.431	277.079	314.226	371.115	355.522	888.1	533.261	412.071	285.069	269.447	257.446	560.281	321.28
MA0619.2	LIN54	667.861	1852.13	751.486	255.661	1259.32	584.357	492.52	511.899	355.79	503.213	610.955	543.077	697.482	781.89	496.758	609.654	760.539	626.468	572.448	509.49	451.662	378.993	297.074	303.387	216.262	280.325	190.462	215.809	319.118	244.49	364.048	125.398	206.068	407.851	284.93	237.236	243.052	210.222	327.916	270.104	264.315	443.402	402.26	301.307	216.119	299.421	354.694	438.109
MA0620.4	MITF	2373.85	2672.58	5174.68	1117.2	1347.59	2191.07	3254.66	2659.21	3723.86	1887.62	3412.72	4110.44	4440.51	2522.86	2045.18	1483	4122.52	1274.81	1783.13	2612.93	1556.11	899.008	1127.87	1636.69	1219.66	890.954	1270.81	1103.02	1068.02	1577.09	1468.46	351.115	2504.27	792.724	1303.65	3025.97	1822.89	2314.65	1091.75	1805.31	2723.51	1090.09	1206.78	1039.24	1386.53	1180.9	772.646	922.115
MA0621.2	mix-a	0	0	0	0	0	0	0	0	0	0	0	0	0	0	0	0	0	0	0	0	0	0	0	0	0	0	0	0	0	0	0	0	0	0	0	0	0	0	0	0	0	0	0	0	0	0	0	0
MA0622.2	Mlxip	0	0	0	0	0	0	0	0	0	0	0	0	0	0	0	0	0	0	0	0	0	0	0	0	0	0	0	0	0	0	0	0	0	0	0	0	0	0	0	0	0	0	0	0	0	0	0	0
MA0623.2	NEUROG1	1520.85	1437.6	1751.09	2360.49	1430.47	1256.74	1063.63	1166.95	2289.95	1143.46	1190.28	915.508	746.172	1137.21	2137.36	1839.87	891.492	1843.47	1642.26	1118	1359.58	893.72	1101.02	1125.73	937.582	1090.88	987.521	1113.12	556.576	711.975	4184.5	266.919	2906.97	903.782	706.469	2670.12	1074.29	1920.76	816.846	1315.89	4032.39	817.569	930.43	1557.05	1146.55	1203.28	563.67	817.803
MA0624.3	Nfatc1	0	0	0	0	0	0	0	0	0	0	0	0	0	0	0	0	0	0	0	0	0	0	0	0	0	0	0	0	0	0	0	0	0	0	0	0	0	0	0	0	0	0	0	0	0	0	0	0
MA0625.3	NFATC3	0	0	0	0	0	0	0	0	0	0	0	0	0	0	0	0	0	0	0	0	0	0	0	0	0	0	0	0	0	0	0	0	0	0	0	0	0	0	0	0	0	0	0	0	0	0	0	0
MA0626.2	Npas2	3019.21	3620.83	7083.88	1888.56	1722.33	2740.96	3229.56	3130.34	3975.78	2555.54	3107.97	3410.42	3488.63	3978.83	3746.41	1947.92	3292.73	2444.95	4222.58	2920.78	5293.53	2603.6	6015.32	6464.94	4503.89	4359.15	6085.18	5022.93	2794.7	4099.9	3712.06	1302.95	5425.4	3833.41	4324.68	6599.05	10339.4	7946.38	3966.42	6780.31	6324.54	3653.28	4269.51	3321.59	6520.04	4513.71	2917.75	3876.22
MA0627.3	POU2F3	517.332	851.57	601.951	583.117	848.552	577.463	521.733	545.139	649.496	441.502	757.585	636.496	629.316	547.979	524.597	1109.27	648.472	896.74	913.436	521.468	949.295	653.984	533.725	658.669	729.38	680.167	492.96	489.672	364.245	455.395	830.356	182.126	548.99	649.114	417.637	610.037	580.894	785.565	561.582	625.626	604.753	761.591	539.617	626.069	641.339	724.768	556.892	692.629
MA0628.2	POU6F1	0	0	0	0	0	0	0	0	0	0	0	0	0	0	0	0	0	0	0	0	0	0	0	0	0	0	0	0	0	0	0	0	0	0	0	0	0	0	0	0	0	0	0	0	0	0	0	0
MA0629.2	Rhox11	2408.45	561.533	5029.44	851.911	371.129	499.514	673.974	557.992	365.938	897.525	286.071	300.187	287.27	368.445	400.252	496.645	337.457	335.887	407.292	542.231	407.99	525.303	624.358	532.923	488.94	636.706	587.391	463.169	347.054	459.425	748.547	161.226	509.664	507.42	480.087	578.566	471.52	546.576	441.804	570.22	788.717	471.391	506.913	487.143	501.002	500.901	410.044	515.299
MA0630.2	SHOX	0	0	0	0	0	0	0	0	0	0	0	0	0	0	0	0	0	0	0	0	0	0	0	0	0	0	0	0	0	0	0	0	0	0	0	0	0	0	0	0	0	0	0	0	0	0	0	0
MA0631.2	Six3	2674.9	1256.16	2948.32	3073.18	2032.2	1938.66	1620.75	1672.2	1959.83	2167.13	2816.14	1386.34	4928.63	1809.88	1687.62	1291.67	3470.27	1440.41	1863.04	1619.91	1599.78	1662.28	1381.31	1307.36	1364.73	1540.7	1246.81	1895.59	2122.08	2092.94	4284.72	1111.27	1915.96	2161.8	1900.83	2374.79	1630.88	1595.47	2063.71	1509.81	2262.54	2113.89	1934.44	2074.87	1540.9	1575.46	2189.16	2355.36
MA0632.3	TCFL5	3034.79	2316.99	3509.79	1237.15	3008.67	2070.17	2746.92	2293.13	2254.13	1747.41	3320.72	3551.17	4299.31	3123.34	2168.91	4741.43	3676.78	4383.72	2192.66	2360.58	7178.33	2839.81	3835.1	11724.3	5073.42	1807.98	4921.6	2450.88	4867.35	5198.76	2157.7	695.064	4522.48	1033.99	3096.49	1931.78	21830.9	5423.72	3825.04	6101.59	5032.56	2015.2	4585.11	3709.5	4412.19	4466.13	4208.89	2073.71
MA0633.3	Twist2	0	0	0	0	0	0	0	0	0	0	0	0	0	0	0	0	0	0	0	0	0	0	0	0	0	0	0	0	0	0	0	0	0	0	0	0	0	0	0	0	0	0	0	0	0	0	0	0
MA0634.2	ALX3	0	0	0	0	0	0	0	0	0	0	0	0	0	0	0	0	0	0	0	0	0	0	0	0	0	0	0	0	0	0	0	0	0	0	0	0	0	0	0	0	0	0	0	0	0	0	0	0
MA0635.2	BARHL2	0	0	0	0	0	0	0	0	0	0	0	0	0	0	0	0	0	0	0	0	0	0	0	0	0	0	0	0	0	0	0	0	0	0	0	0	0	0	0	0	0	0	0	0	0	0	0	0
MA0636.1	BHLHE41	2681.82	1539.58	4983.72	1480.56	1028.71	1412.64	1609.64	1615.92	2137.73	1193.37	1380.04	2060.2	1952.46	2312.86	1571.93	1567.26	1852.24	1320.11	2485.77	1652.25	2384.73	1371.43	2601.49	3257.42	2292.91	1690.64	2924.15	1939.76	1764.28	2142.64	1805.92	661.624	2704.05	1355.67	2358.8	3285	4360.35	3232.99	2104.95	2677.96	2793.28	1682.28	2070.17	1659.89	2234.16	2121.13	1619.84	1360.22
MA0638.2	CREB3	2458.63	1179.35	1544.4	872.924	789.1	857.446	2227.65	893.496	940.814	790.439	737.459	814.615	732.782	1258.15	937.84	725.638	695.062	1271.68	906.031	782.602	1127.43	1038.27	2687.09	1636.69	1683.08	1788.43	2685.67	1952.38	986.364	1229.16	1143.27	401.274	1646.97	1051.22	1580.77	2996.93	2483.99	2139.84	1205.63	1895.35	1858.67	972.244	1334.33	1290.03	2102.24	1637.02	1556.59	913.77
MA0639.2	DBP	361.614	252.292	272.878	479.802	187.366	140.521	134.959	131.188	110.438	114.346	132.254	114.594	90.0762	143.909	107.023	151.67	110.807	135.917	132.09	115.394	178.137	109.291	161.125	111.774	107.459	99.9607	147.248	93.3911	90.2555	141.052	237.244	38.2166	102.247	109.143	130.105	147.668	143.4	115.069	157.086	163.909	116.299	111.955	161.885	128.101	91.2189	120.328	96.0159	143.95
MA0640.3	ELF3	8678.73	6312.61	18482.4	9244.07	11096	16165.8	13695.1	15276.3	15020.2	15442.1	13520.1	11131.8	12649.6	14893.4	12034.2	11311.8	13711.1	12212.2	11587.8	14246.9	12507.5	10906.2	11085.7	9902	7957.36	11134.7	10216.1	13574.5	8900.91	9347.02	10027.7	3940.48	8741.37	11578.7	12712.5	11244.5	10076.9	10433.6	10707.4	11185.1	9830.42	10802.2	10014	10147	10408.8	11517.9	8462.95	11561.9
MA0641.1	ELF4	5998.63	1342.91	3555.99	1945.47	2997.86	2474.77	4271.38	2557.72	2259.51	2068.66	2298.63	1556.99	1925.68	2864.59	2447.91	2171.96	2291.69	2782.4	3716.09	2553.04	2978.9	3770.55	1069.13	1756.45	1590.4	1006.13	1248.41	1450.09	2238.12	1782.62	2656.73	709.992	1785.4	1286.74	1878.71	1970.51	1657.61	1825.61	1582.64	2250.87	2364.04	1798.65	1752.94	1984.66	1444.06	1527.89	1752.01	1201.67
MA0642.3	EN2	1394.55	1395.89	1348.68	1820.27	1127.8	973.575	1465.63	997.648	757.546	1121.23	1348.41	1723.9	1342.62	1549.25	866.698	1224.27	1393.9	1026.41	999.889	2858.09	819.428	574.66	716.669	548.891	554.759	519.361	733.038	591.897	677.991	603.164	2734.45	271.099	1217.53	796.553	1393.42	1101.45	542.005	606.323	598.889	600.232	1262.37	936.89	703.137	663.958	489.775	744.356	1049.4	903.339
MA0643.2	Esrrg	4502	1596.53	1394.39	1474.43	2635.74	1915.86	1550.8	1889.81	4022.94	1708.38	2274.19	3832.68	2079.06	1737.22	2305.63	1948.91	2164.51	2990.18	2442.89	1730.11	2465.18	2148.81	2227.21	2191.57	2053.82	3631.18	2045.46	6855.41	2103.81	2275.63	2028.85	944.665	2122.03	2780.28	3443.87	2430.46	2289.55	2529.3	2599.77	2255.49	2609.32	2890.22	2637.58	2168.69	2304.33	2420.56	2068.3	2856.05
MA0644.3	ESX1	503.491	262.225	550.042	882.555	304.47	255.59	269.507	233.568	525.925	202.374	544.828	539.34	617.143	215.629	243.739	290.453	590.551	287.457	241.792	218.809	211.465	190.378	528.69	231.532	220.292	193.402	622.602	374.826	336.309	317.03	1642.3	139.132	884.047	434.658	255.006	842.431	277.079	314.226	371.115	355.522	888.1	533.261	412.071	285.069	269.447	257.446	560.281	321.28
MA0645.2	ETV6	15783	4074.42	6048.09	6117.47	7721.65	10010.4	9301.91	11047.7	9417.1	9249.31	6102.36	4837.87	5094.17	8963.61	8303.85	6485.14	5700.26	7252.04	6991.3	9393.62	7556.44	6638.56	4477.92	6427.02	4990.14	5576.07	4361.42	4404.52	4500.96	4766.2	6190.85	1514.33	5722.71	4176.16	5132.64	6419.91	5245.06	6377.46	4903.04	6667.19	6252.64	4581.33	4725.74	5759.11	6362.87	6506.12	3732.19	4139.08
MA0646.2	GCM1	3392.94	3416.21	6304.77	9434.94	2893.37	8030.4	8234.99	7857.98	10162.1	8832.31	4398.88	2915.92	2363.89	6095.27	5870.16	3767.96	2491.9	4155.63	7952.1	7676.69	6155.48	8618.14	9143.82	7688.47	8850.62	7738.26	9286.22	8010.18	6327.56	8074.87	9129.82	2705.02	9402.04	6213.5	6032.96	8068.46	10072.1	10004.3	7477.28	10797.2	8938.09	5798.11	7466.34	10641.4	8842.62	6371.8	6780.98	6596.67
MA0647.2	GRHL1	804.547	925.735	752.915	678.552	817.925	683.517	553.827	578.379	466.825	573.998	1288.04	1332.78	1194.12	890.173	497.377	717.707	1621.81	617.095	829.739	562.595	657.381	551.744	448.128	526.936	671.62	851.839	360.117	643.641	466.32	733.469	339.505	216.162	309.888	626.137	1203.47	392.166	435.063	342.993	557.654	334.745	327.751	886.804	593.579	557.508	1128.31	540.078	777.164	680.112
MA0648.2	GSC	0	0	0	0	0	0	0	0	0	0	0	0	0	0	0	0	0	0	0	0	0	0	0	0	0	0	0	0	0	0	0	0	0	0	0	0	0	0	0	0	0	0	0	0	0	0	0	0
MA0649.2	HEY2	2584.93	2937.45	4224.61	3917.21	1960.14	3062.31	3398.26	3836.36	4099.94	2690.76	2524.32	2745.28	3043.11	4981.97	3159.33	2313.71	2807.95	2449.63	3785.84	3805.6	5485.46	3077.78	6384.56	7804.24	5239.98	4433.04	6813.41	4985.06	3480.21	4579.48	3517.76	1544.78	4870.12	3716.61	4401.45	6030.16	11360.2	7424.14	4341.46	6392.47	5969.3	3638.55	4678.31	3696.87	6124.29	5028.6	3522.09	3711.41
MA0650.4	Hoxa13	1988.01	1689.23	4733.22	4264.81	1866.45	1211.67	1150.86	1205.95	1254.82	1065.41	1395.85	1469.8	1236.72	1149.4	1526.16	3089.91	1317.09	1434.16	1785.02	1215.83	1104.45	1727.51	2005.67	1528.91	1126.98	1447.26	2000.65	1419.8	3342.68	2058.01	11792.7	917.794	6466.75	2831.98	1567.76	5592	1147.2	1772.5	1867.36	1560.6	10249.1	3883.08	2246.77	1930.53	1159.18	1357.19	3971.67	3671.77
MA0651.3	HOXC11	501.76	633.711	487.657	177.737	205.382	107.114	134.137	146.257	144.465	91.2045	241.507	257.837	328.656	140.628	219.613	181.409	303.46	164.038	194.605	146.538	140.211	116.342	199.727	155.685	130.294	106.48	185.66	145.135	121.415	95.3778	351.776	49.5621	160.45	112.973	676.545	295.335	140.97	97.3658	88.3607	115.429	277.002	136.998	125.911	122.688	171.211	176.295	121.997	112.656
MA0652.2	IRF8	441.203	966.79	697.673	367.731	572.908	752.452	663.688	563.753	497.867	732.812	596.58	509.446	604.971	323.444	356.33	636.42	606.92	568.665	467.396	549.418	484.991	757.987	345.747	475.04	456.702	536.745	419.336	468.217	421.192	407.035	439.721	178.543	427.866	488.272	373.401	496.26	296.523	389.463	390.751	461.717	439.821	608.389	443.14	801.08	450.481	503.699	450.71	700.974
MA0653.1	IRF9	581.35	1419.06	971.027	359.851	695.417	810.782	800.704	644.859	573.682	709.217	800.711	657.671	727.913	395.164	446.649	681.029	807.128	668.65	530.771	621.29	575.783	1394.34	547.153	750.484	1433.24	1134.34	536.174	882.167	817.672	753.619	664.694	422.771	558.428	1055.05	852.187	534.992	393.744	526.66	810.955	554.06	596.295	1138.7	1033.45	1856.56	839.213	688.389	942.086	1358.14
MA0654.2	ISX	0	0	0	0	0	0	0	0	0	0	0	0	0	0	0	0	0	0	0	0	0	0	0	0	0	0	0	0	0	0	0	0	0	0	0	0	0	0	0	0	0	0	0	0	0	0	0	0
MA0655.1	JDP2	603.843	900.572	514.802	525.331	592.726	1005.92	718.823	903.246	856.045	1225.59	355.073	305.169	279.966	527.354	658.22	459.967	259.389	660.838	673.194	826.524	389.602	433.639	375.957	409.173	384.167	467.207	368.12	477.052	392.182	370.764	513.348	188.097	363.372	405.936	385.11	527.73	405.896	389.463	469.294	500.963	389.072	453.714	488.926	458.275	399.96	405.758	378.416	440.195
MA0656.2	JDP2	18148.2	521.14	885.306	5239.3	917.013	418.382	851.314	409.076	551.594	389.774	876.9	621.549	567.236	789.39	339.008	604.698	540.184	546.793	457.407	360.556	365.467	564.083	667.996	453.085	566.848	319.44	918.698	670.144	1083.07	685.108	828.311	279.459	882.474	530.397	2067.37	2926.72	789.918	940.465	832.554	826.473	1099.55	883.858	915.713	678.392	603.448	374.976	1149.93	632.128
MA0657.2	KLF13	9123.39	5873.58	9347.39	9498.85	8761.17	9015.11	9456.21	9344.92	8961.61	9053.29	11654.2	15787.8	12956.4	9829.41	14177.1	9583.97	12788.1	6463.09	10928.2	9217.13	10337.7	6125.59	7777.62	6077.72	6855.9	5991.12	8415.53	7326.15	5948.27	7079.45	7732.94	2466.76	7330.35	6301.58	6950.2	7925.63	6839.48	7727.3	6475.86	8405.55	7887.17	8010.7	7889.85	7850.22	7679.22	6875.5	7288.17	5716.28
MA0658.2	LHX6	441.203	256.266	735.295	813.387	299.065	265.135	275.679	253.955	678.747	205.097	780.585	763.546	875.199	225.473	251.163	298.384	847.421	290.581	232.492	218.41	220.66	252.075	654.569	247.5	263.275	243.382	827.469	472.003	460.948	365.391	2311.09	176.752	1198.65	582.097	299.241	1048.2	332.981	387.25	508.565	420.162	1108.01	751.279	582.132	344.609	339.615	265.841	799.756	404.729
MA0659.4	Mafg	1688.68	10099	2499.72	1920.96	1904.29	5251.79	4679.97	4853.51	4825.85	4954.99	2192.25	2488.69	3340.12	6645.6	5662.92	2614.08	2479.31	2165.3	2533.3	4820.99	2868.57	3721.19	6567.51	3638.65	3622.72	5084.96	4340.61	3812.63	11122.9	4189.91	2996.23	1999.8	3811.47	5499.28	4190.68	3815.15	3115.92	4257.54	5016.93	4441.72	3653.89	5300.2	5041.33	3480.37	4031.87	3553.88	3814.66	5493.05
MA0660.1	MEF2B	333.93	410.555	1255.33	1878.93	461.209	782.147	393.357	627.131	588.606	1159.34	228.569	242.89	228.842	209.535	251.782	378.68	224.132	282.77	269.002	685.176	271.227	297.906	240.009	221.553	201.486	199.921	300.898	257.457	235.309	209.562	486.76	71.656	212.36	371.47	218.576	164.613	245.482	234.563	247.41	249.327	302.377	424.252	248.551	234.55	185.244	257.446	385.193	260.779
MA0661.2	MEOX1	503.491	262.225	550.042	882.555	304.47	255.59	269.507	233.568	525.925	202.374	544.828	539.34	617.143	215.629	243.739	290.453	590.551	287.457	241.792	218.809	211.465	190.378	528.69	231.532	220.292	193.402	622.602	374.826	336.309	317.03	1642.3	139.132	884.047	434.658	255.006	842.431	277.079	314.226	371.115	355.522	888.1	533.261	412.071	285.069	269.447	257.446	560.281	321.28
MA0662.2	MIXL1	0	0	0	0	0	0	0	0	0	0	0	0	0	0	0	0	0	0	0	0	0	0	0	0	0	0	0	0	0	0	0	0	0	0	0	0	0	0	0	0	0	0	0	0	0	0	0	0
MA0663.1	MLX	1302.85	1306.49	2735.93	986.746	675.599	955.015	1045.94	936.486	1453.61	740.98	796.398	744.862	1073.61	1514.09	935.366	720.681	928.008	731.14	1666.54	965.875	1435.44	782.666	1468.58	1810.34	1351.3	1034.38	1714.16	1162.34	872.47	1210.36	1247.58	296.178	1993.04	777.405	1068.16	2185.96	2253.09	2168.6	975.895	1791.46	2188.53	936.89	1107.03	905.725	2095.23	1099.74	689.055	1151.6
MA0664.2	MLXIPL	2200.83	2454.72	3883.63	1299.32	862.965	1428.55	1607.17	1611.93	2086.39	1385.76	1240.6	1314.1	1539.82	2060.2	1708.65	1120.18	1441.75	1445.1	2118.61	1527.27	2472.08	1397.87	2948.92	3111.71	2318.43	1984	3048.99	2611.16	1598.81	2149.36	2061.57	695.064	3138.21	1880.33	2176.65	4246.05	4963.12	4343.84	2024.44	3340.52	3882.26	1950.38	2268.03	1750.11	2545.71	2185.5	1554.33	1648.12
MA0665.1	MSC	3763.2	2752.7	2715.92	3210.65	6907.32	3857.71	3188.42	3987.05	5320.73	3855.09	3760.61	2960.77	1957.33	4455.09	5039.34	3265.37	1995.78	2898	4469.71	3733.33	4005.2	2459.05	4023.08	3546.84	3364.82	4582.98	3718.01	3421.39	3455.5	3526.29	3059.64	1864.25	3685.63	5102.92	4454.79	4311.41	2851	4029.62	4698.83	4215.47	3433.98	4781.67	4400.33	2334.68	3664.19	3802.93	3339.09	4906.82
MA0666.3	MSX1	0	0	0	0	0	0	0	0	0	0	0	0	0	0	0	0	0	0	0	0	0	0	0	0	0	0	0	0	0	0	0	0	0	0	0	0	0	0	0	0	0	0	0	0	0	0	0	0
MA0667.1	MYF6	1290.74	1681.29	607.666	1344.85	3666.25	1514.45	1211.75	1508.66	2219.51	1759.66	1687.67	884.368	850.855	1951.44	1656.69	1422.53	858.754	1349.8	1671.71	1332.02	1400.96	824.972	1253.75	1335.3	1159.22	1731.93	1195.59	1280.97	1173.32	1284.24	1478.69	647.89	2049.67	1843.94	1428.55	8378.32	986.79	1763.65	1753.47	1957.68	1979.19	2647.16	1672.81	893.096	1357.06	1407.56	1110.4	1679.42
MA0668.3	Neurod2	7367.23	5665.65	2951.18	6833.68	7914.42	6064.16	5123.52	5752.32	7910.96	5931.47	4879.02	4870.25	4830.03	7157.01	6451.05	25027.6	4306.36	4678.99	6025.86	5509.36	6055.49	4699.52	5424.53	5251.39	5239.98	6740.83	5131.27	6892.01	6530.63	5651.47	5736.82	3128.98	6147.43	8428.91	5750.63	11489	4494.03	6709.39	7157.22	7066.57	7123.83	7449.45	6692.88	4806.48	5860.46	6086.37	6561.84	8288.6
MA0669.1	NEUROG2	4024.47	2129.59	1394.87	1097.07	1927.71	1102.96	1411.31	998.092	2895.87	1037.28	996.216	914.262	837.465	1163.93	1415.42	1575.19	842.385	1590.39	1996.68	990.231	1232.02	920.161	884.507	1103.77	979.223	1258.2	854.678	1412.22	675.842	859.744	1028.74	332.006	917.081	1118.24	788.435	1043.36	1008.66	1232.56	928.769	1112.74	1127.04	954.567	1018.73	981.503	1122.69	1113.74	687.926	1011.82
MA0670.2	NFIA	0	0	0	0	0	0	0	0	0	0	0	0	0	0	0	0	0	0	0	0	0	0	0	0	0	0	0	0	0	0	0	0	0	0	0	0	0	0	0	0	0	0	0	0	0	0	0	0
MA0671.2	NFIX	0	0	0	0	0	0	0	0	0	0	0	0	0	0	0	0	0	0	0	0	0	0	0	0	0	0	0	0	0	0	0	0	0	0	0	0	0	0	0	0	0	0	0	0	0	0	0	0
MA0672.2	NKX2-3	2387.69	3065.25	2012.54	1924.46	2023.19	2534.69	2108.74	2241.27	2867.81	2259.69	1749.49	1677.81	1900.12	2221.92	2194.27	2342.46	1779.21	2041.88	2360.57	2221.23	2601.94	1586.48	1356.13	1335.3	1300.26	1716.72	1320.43	1617.94	1076.62	1276.18	1869.32	454.419	1824.72	1508.86	1440.26	1953.57	1373.24	1630.88	1478.57	1701.43	2006.68	1595.36	1386.65	1688.76	1508.62	1799.33	1103.62	1437.41
MA0673.2	NKX2-8	1967.25	1960.73	1981.11	1028.77	1614.23	2116.84	1803.03	1864.55	2211.15	1855.85	1430.35	1177.08	1688.32	1937.38	1749.48	1736.77	1215.1	1651.31	1687.21	1845.1	1908.93	1366.14	1030.53	1017.94	1118.92	1382.06	990.722	1268.35	960.577	1049.16	1274.17	404.26	1113.71	1229.3	1271.12	1428.26	1062.14	1243.63	1225.27	1352.83	1393.47	1168.17	1079.23	1362.2	1195.67	1379.58	921.753	1153.69
MA0674.2	NKX6-1	0	0	0	0	0	0	0	0	0	0	0	0	0	0	0	0	0	0	0	0	0	0	0	0	0	0	0	0	0	0	0	0	0	0	0	0	0	0	0	0	0	0	0	0	0	0	0	0
MA0675.2	NKX6-2	0	0	0	0	0	0	0	0	0	0	0	0	0	0	0	0	0	0	0	0	0	0	0	0	0	0	0	0	0	0	0	0	0	0	0	0	0	0	0	0	0	0	0	0	0	0	0	0
MA0676.1	Nr2e1	555.397	1210.47	542.423	916.702	724.242	465.577	364.555	453.839	811.273	446.947	748.959	626.531	1247.68	380.164	885.875	1008.16	1011.11	882.68	531.288	477.547	570.037	361.366	354.139	415.161	322.378	434.612	300.898	403.853	275.064	313	429.494	123.01	357.079	402.106	1307.55	382.483	337.842	369.548	369.151	297.807	501.142	413.94	493.831	409.561	348.035	537.279	372.768	385.953
MA0677.2	Nr2f6	9777.41	7509.18	8261.11	6464.19	6127.23	12176	9543.85	10406.4	14575.5	12343.5	7538.47	17595.2	6689.98	9890.82	12914.5	7263.32	7184.82	7303.59	9147.28	10008.9	7726.53	5810.06	7259	6782.3	5998.91	8079.43	7021.48	21057.2	7896.28	8124.58	7986.55	3579.22	7862.04	9267.59	12254.6	10053.5	6516.22	9035.1	8380.52	7576.77	8434.83	9056.6	8802.3	6722.57	8698.07	9385.6	9058.25	8858.14
MA0678.1	OLIG2	776.864	1065.46	1442.02	1695.07	1005.29	673.972	574.4	643.973	1150.35	642.061	679.957	563.006	454.033	600.012	1742.68	1134.06	571.663	1135.77	839.383	601.725	770.01	474.183	602.539	616.754	467.448	580.207	510.566	512.389	231.011	354.644	2311.09	114.052	1486.52	474.868	415.034	1394.37	510.409	893.995	408.423	713.352	2241.39	387.425	462.762	757.778	547.313	716.372	314.029	467.316
MA0679.3	ONECUT1	1124.64	392.014	872.448	367.731	1198.06	300.132	269.507	310.685	271.021	276.336	306.196	323.853	273.88	232.505	1232.93	410.402	268.203	292.144	653.734	262.331	268.929	232.684	161.125	175.645	142.384	169.499	145.647	204.451	337.384	145.082	1143.27	88.9729	295.731	300.622	251.102	464.79	162.845	269.969	233.665	170.835	503.256	303.458	217.482	281.46	147.353	223.866	380.675	431.85
MA0680.3	Pax7	231.848	294.672	2664.49	372.985	326.089	195.669	341.925	224.704	105.662	142.025	211.319	212.996	174.066	167.816	211.571	230.975	173.765	184.347	453.274	177.283	129.867	74.0359	147.698	131.734	87.3107	104.307	251.282	152.707	132.16	108.811	484.715	102.707	361.798	181.905	148.32	283.231	102.082	126.133	135.487	103.886	251.628	176.772	155.344	120.884	110.866	95.1432	399.878	148.123
MA0681.3	PHOX2B	237.039	400.622	831.016	162.852	398.153	103.933	131.668	202.543	113.423	84.8519	253.007	241.644	370.043	100.783	183.733	402.471	294.646	409.314	201.493	132.164	106.882	95.1891	119.165	129.738	79.2512	86.9223	92.8302	98.4392	257.873	65.8241	147.255	56.1306	140	168.502	106.686	121.039	77.7766	55.3215	90.3243	83.109	80.3519	197.395	124.275	79.3863	70.1683	145.513	254.16	146.036
MA0682.3	PITX1	0	0	0	0	0	0	0	0	0	0	0	0	0	0	0	0	0	0	0	0	0	0	0	0	0	0	0	0	0	0	0	0	0	0	0	0	0	0	0	0	0	0	0	0	0	0	0	0
MA0683.2	POU4F2	311.438	927.059	2833.08	315.198	286.454	154.839	155.121	154.234	219.683	126.144	186.88	165.663	186.239	174.378	251.782	575.95	181.321	264.023	222.159	165.704	234.451	123.393	142.662	183.629	103.43	132.556	160.052	123.68	139.681	115.528	396.771	59.7134	121.124	139.78	227.683	162.192	128.817	123.92	149.232	124.663	217.796	164.987	137.357	156.968	112.269	162.303	240.605	137.691
MA0684.3	RUNX3	4149.04	2215.01	3572.66	4769.13	1834.03	2665.13	2215.72	2063.99	2010.57	2298.26	1604.3	1691.51	1404.7	2493.8	1815.67	2238.37	1494.63	1526.33	3374.07	1904.6	1659.54	1790.96	1822.72	1387.2	1597.11	2060.06	1717.36	2082.37	2215.56	1953.23	2748.76	727.309	2214.84	2309.24	2037.44	3185.75	1288.17	2310.23	2004.81	2137.75	3245.79	2408.51	1980.23	2204.77	1716.32	1651.01	2026.5	2622.39
MA0685.2	SP4	139278	180128	172640	128976	232336	227825	64176.1	131456	199243	212807	223660	467972	262028	122310	203462	224108	265407	648484	32469.2	130274	219336	541804	598335	516916	215313	471884	615648	374352	336600	419966	496264	51027.5	638068	220165	284659	286245	333008	457301	290807	471888	503762	239271	328682	494230	627330	621277	324057	221981
MA0686.2	SPDEF	4410.3	903.22	2324.47	885.182	2610.51	1632.17	1696.87	1591.54	1781.34	1369.43	1430.35	1555.74	2191.04	1901.29	1427.18	1305.55	1789.28	1516.96	6629.99	1581.18	2115.8	1667.57	2012.38	1802.36	1135.04	912.684	1717.36	1476.59	2068.36	1934.42	1640.26	631.17	1573.04	1443.75	1134.51	1718.75	2219.06	1659.64	1743.65	1768.38	1820.6	1702.9	1816.71	1333.33	1298.11	1432.74	1932.74	1424.9
MA0687.2	SPIC	3422.35	6057.67	5323.27	3241.29	8572	3927.17	3291.69	3620.96	5778.6	3704.44	7551.41	5065.81	8861.55	5659.33	4139.24	5667.31	9406	6795.86	4493.47	3373.17	5385.47	5332.35	5721.6	5357.18	3779.88	4587.33	6171.6	4355.31	5274.58	5887.9	6644.89	2180.73	5784.06	7077.07	10516.4	6787.87	5220.75	6231.41	5244.7	5589.08	6311.85	8267.02	5258.81	8144.31	4043.1	6396.98	7647.38	6292.08
MA0688.2	TBX2	13497.4	3071.21	5877.6	2929.59	3686.07	5221.03	5810.25	4810.96	5429.38	5236.32	3335.1	8227.12	2580.56	5301.2	4142.95	3542.94	2824.32	3240.14	3913.45	5171.96	3806.38	3728.24	3981.12	3441.05	3707.35	4726.4	3762.82	5626.18	4334.41	4576.79	5133.48	2171.78	3992.37	5137.39	4914.06	4781.04	2967.66	3799.48	5064.05	4021.55	3804.03	4921.62	4876.17	4739.72	4729.35	4759.96	4310.55	5378.31
MA0689.1	TBX20	4929.36	3430.78	6225.24	4273.56	4039.18	5641.54	5576.13	5450.06	5774.43	5573.91	3199.97	3399.21	2777.75	5686.52	4754.78	4140.69	2772.69	3919.72	4955.01	6337.08	3615.6	5346.45	4766.6	4137.64	4407.17	5660.82	4412.63	6470.49	4174.32	4744.71	5689.78	2100.72	4634.17	5616.08	6274.96	5734.83	3626.33	4346.06	5443.02	5044.26	4761.9	5027.68	5289.88	6464.57	5456.29	4883.09	4368.16	6006.26
MA0690.3	TBX21	2742.38	1769.36	3850.77	2344.73	2853.73	3634.47	4137.66	3579.3	3095.25	3628.67	2655.14	1860.91	2915.3	3514.76	2990.45	2285.96	2387.39	2591.8	2738.93	3845.93	2677.79	2663.53	2675.34	2640.67	2584.4	3342.16	2472.8	3820.2	3066.54	3138.06	3084.18	1434.91	2623.83	3691.72	3619.52	3652.96	2257.95	2766.07	3499.09	3012.7	2852.49	3510.39	3881.97	3166.43	3420.01	3506.31	3236.3	3861.62
MA0691.1	TFAP4	3145.52	3751.94	2470.19	2994.38	2835.71	4739.55	3935.63	4863.7	7004.17	4410.94	3832.49	3882.5	2917.74	6679.35	7077.72	4067.34	3013.19	3201.08	4520.51	4284.75	3959.23	3176.49	4949.55	4435.04	4108.97	7064.61	4511.87	5093.6	6531.71	5411.01	4352.21	2925.36	5362.48	8518.91	5944.49	6211.72	3215.57	5463.55	7538.15	5976.92	5392.03	8032.8	7392.75	3227.77	5282.27	5095.76	5636.7	8253.14
MA0692.2	TFEB	2681.82	3914.84	6019.51	1926.21	1596.22	2615.29	2774.9	3034.61	3611.03	2220.67	3082.09	3924.85	3920.75	3106.94	2632.26	1888.44	3610.04	1768.48	3225.27	2979.08	3593.76	1697.54	3036.19	3538.85	2509.17	2392.54	3223.45	2373.9	1723.45	2506.69	2621.96	717.755	3783.15	1889.9	2211.78	5536.32	4844.02	4892.63	2277.74	3774.53	4415.12	2121.26	2374.31	1930.53	3578.59	2459.73	1508.01	2092.49
MA0693.4	Vdr	904.899	1003.21	747.201	550.721	753.068	2412.2	1429.01	4631.46	1131.84	2235.64	514.64	1010.17	570.888	1079.55	767.099	849.551	614.475	835.812	920.325	4141	784.95	479.471	486.731	562.863	468.791	595.418	419.336	530.057	689.81	656.898	539.936	286.027	456.181	909.526	1562.56	1086.93	374.3	531.086	769.72	623.318	657.616	833.773	845.4	519.619	551.523	643.616	652.908	897.08
MA0694.2	ZBTB7B	65099.1	42736.1	38969.7	35631.4	39916.2	39208.1	42585	41496.6	29952	40406.8	40208	44689.2	49400.7	30737.5	34989	44096.4	48960.3	36614.8	47641.6	43098.6	38263.7	28013.8	37392.7	30099.2	43973.7	28243.2	40534.8	39070.3	38787.3	37286	43601.9	9034.63	44650.7	23320.2	34432.2	30818.9	29778.7	31922.7	31611.5	37232.8	39704.4	27268.5	35305.7	35909.7	37328.2	26119.6	44438.4	20847.7
MA0695.3	ZBTB7C	67244.6	48191.8	24715.7	22732.8	38255.1	28107.5	31936	29200.8	28233.4	26595.9	31433.3	40101.7	39038.3	22306.4	29411.4	29074.1	36735	31168.8	39870	28935.9	31647.4	30160.8	33925.1	26827.8	34682.5	29232	32722.6	39745.5	20743.7	25942.8	28786.4	7565.09	29461.4	21150.8	28551.5	28252.9	21590.3	28428.6	24140.2	31029.7	29584.3	23045.1	26570.4	28997.6	29417.4	27474	22078	19354
MA0696.1	ZIC1	32586.7	41813.7	32654.4	45834.2	24042.3	41595.4	50142.4	47149.2	37692.9	44779.6	22700.2	28825.4	28979	35671.6	48062.5	29029.5	28051.8	37963.1	40566.1	49829.4	43592.9	47605.1	67366.9	57156.5	63795.9	39441	72820.5	56470	52152.6	50590.5	45700.2	14620.8	54150.2	32166.6	39995.5	42964	65218.1	55768.5	43989.9	63650	52361.9	34231.8	49057.7	56158.6	59018.6	36481.8	43310	30204.5
MA0697.3	Zic3	8711.6	20411.9	12562.4	18179.1	9888.97	23998.4	26968.4	25198.7	34529.5	25221.9	13875.2	11900.4	11052.6	27560.7	29606.3	15186.8	12537.6	18892.5	20519.8	26399.6	22102.7	23354.8	40801.5	33987.3	28918.6	28664.8	41403.8	29947	41377.9	34827.7	23184.5	13714.4	25678.3	33420.8	25678.8	28163.4	40912.9	36065.2	35568.1	37807.7	27918	32062	33426.8	27267.4	30580.8	26707.3	30562.4	32789.3
MA0698.2	ZBTB18	2086.63	3438.06	2804.03	3025.9	6928.94	4102.16	3812.19	4207.32	5406.7	6056.25	3658.54	2598.3	2600.04	4083.83	4118.83	7857.11	2528.41	2915.19	4786.41	4117.44	4032.78	2589.5	3511.17	3205.52	3006.17	4380.88	3428.31	4364.14	5436.82	4394.1	4141.55	2657.24	4234.62	6665.39	5331.7	9063.4	3035.72	5076.3	5262.37	4580.23	5527.36	6100.09	5021.71	2780.32	3894.34	3430.75	6740.32	7170.38
MA0699.2	LBX2	0	0	0	0	0	0	0	0	0	0	0	0	0	0	0	0	0	0	0	0	0	0	0	0	0	0	0	0	0	0	0	0	0	0	0	0	0	0	0	0	0	0	0	0	0	0	0	0
MA0700.3	LHX2	0	0	0	0	0	0	0	0	0	0	0	0	0	0	0	0	0	0	0	0	0	0	0	0	0	0	0	0	0	0	0	0	0	0	0	0	0	0	0	0	0	0	0	0	0	0	0	0
MA0701.3	LHX9	503.491	262.225	550.042	882.555	304.47	255.59	269.507	233.568	525.925	202.374	544.828	539.34	617.143	215.629	243.739	290.453	590.551	287.457	241.792	218.809	211.465	190.378	528.69	231.532	220.292	193.402	622.602	374.826	336.309	317.03	1642.3	139.132	884.047	434.658	255.006	842.431	277.079	314.226	371.115	355.522	888.1	533.261	412.071	285.069	269.447	257.446	560.281	321.28
MA0702.3	LMX1A	0	0	0	0	0	0	0	0	0	0	0	0	0	0	0	0	0	0	0	0	0	0	0	0	0	0	0	0	0	0	0	0	0	0	0	0	0	0	0	0	0	0	0	0	0	0	0	0
MA0703.3	LMX1B	337.391	235.738	2193.5	483.304	189.168	147.415	132.902	401.098	180.88	141.117	182.568	188.084	208.149	118.127	214.045	223.044	195.171	242.151	274.513	502.702	133.315	141.021	325.606	163.669	182.681	141.249	451.347	355.896	338.458	202.846	2172.01	131.369	684.271	434.658	241.995	643.928	157.984	340.78	280.791	283.956	685.105	441.929	225.658	312.132	266.64	151.11	719.554	319.193
MA0704.2	Lhx4	0	0	0	0	0	0	0	0	0	0	0	0	0	0	0	0	0	0	0	0	0	0	0	0	0	0	0	0	0	0	0	0	0	0	0	0	0	0	0	0	0	0	0	0	0	0	0	0
MA0705.2	Lhx8	0	0	0	0	0	0	0	0	0	0	0	0	0	0	0	0	0	0	0	0	0	0	0	0	0	0	0	0	0	0	0	0	0	0	0	0	0	0	0	0	0	0	0	0	0	0	0	0
MA0706.2	MEOX2	654.019	317.187	751.963	1359.73	270.24	269.377	212.726	461.817	259.679	347.122	260.195	191.821	206.932	178.129	226.418	191.322	206.504	253.087	324.628	564.192	205.719	192.141	369.244	267.46	216.262	230.344	419.336	379.875	265.394	321.06	1315.07	108.081	688.99	268.071	209.469	728.655	221.177	325.29	286.682	318.585	742.197	319.662	268.173	290.482	289.094	263.043	395.36	212.796
MA0707.3	MNX1	0	0	0	0	0	0	0	0	0	0	0	0	0	0	0	0	0	0	0	0	0	0	0	0	0	0	0	0	0	0	0	0	0	0	0	0	0	0	0	0	0	0	0	0	0	0	0	0
MA0708.3	MSX2	0	0	0	0	0	0	0	0	0	0	0	0	0	0	0	0	0	0	0	0	0	0	0	0	0	0	0	0	0	0	0	0	0	0	0	0	0	0	0	0	0	0	0	0	0	0	0	0
MA0709.2	Msx3	0	0	0	0	0	0	0	0	0	0	0	0	0	0	0	0	0	0	0	0	0	0	0	0	0	0	0	0	0	0	0	0	0	0	0	0	0	0	0	0	0	0	0	0	0	0	0	0
MA0710.2	NOTO	503.491	262.225	550.042	882.555	304.47	255.59	269.507	233.568	525.925	202.374	544.828	539.34	617.143	215.629	243.739	290.453	590.551	287.457	241.792	218.809	211.465	190.378	528.69	231.532	220.292	193.402	622.602	374.826	336.309	317.03	1642.3	139.132	884.047	434.658	255.006	842.431	277.079	314.226	371.115	355.522	888.1	533.261	412.071	285.069	269.447	257.446	560.281	321.28
MA0711.2	OTX1	0	0	0	0	0	0	0	0	0	0	0	0	0	0	0	0	0	0	0	0	0	0	0	0	0	0	0	0	0	0	0	0	0	0	0	0	0	0	0	0	0	0	0	0	0	0	0	0
MA0712.3	OTX2	4766.72	3828.75	7867.27	5289.2	3974.32	3300.93	2659.69	2832.95	2531.12	3081.44	2958.46	2532.28	2584.21	3675.54	2671.85	3902.78	2639.22	2852.7	3145.71	2570.61	2342.21	2095.92	2794.51	2540.87	2107.55	2236.08	3032.99	2241.39	3225.56	3910.49	7164.38	1313.69	3528.32	3754.91	2926.06	4367.09	2593.36	3248.48	3100.48	2539.44	5142.52	3672.43	2894.31	2403.24	2325.38	2714.38	3270.19	4022.26
MA0713.1	PHOX2A	233.578	331.755	732.438	311.696	466.614	149.006	121.381	238.886	105.066	110.716	227.132	256.591	230.059	134.534	110.116	220.07	217.836	192.159	190.816	148.934	119.524	128.681	166.16	141.714	81.9377	108.653	132.843	95.9152	323.416	90.0044	1846.83	77.0302	537.979	179.99	200.361	239.657	126.387	143.836	149.232	136.206	444.05	268.104	147.168	115.471	81.3953	151.11	260.937	208.623
MA0714.2	PITX3	0	0	0	0	0	0	0	0	0	0	0	0	0	0	0	0	0	0	0	0	0	0	0	0	0	0	0	0	0	0	0	0	0	0	0	0	0	0	0	0	0	0	0	0	0	0	0	0
MA0715.1	PROP1	186.863	385.392	984.362	263.541	371.129	99.1604	122.204	273.899	81.784	72.1468	261.633	413.536	395.605	136.409	90.9383	204.209	273.24	182.785	190.644	126.973	105.733	61.6966	134.27	139.718	76.5647	106.48	108.835	70.6743	233.16	67.1675	323.143	32.8424	171.461	141.695	67.6545	157.351	102.082	86.3015	102.106	96.9605	260.086	181.191	106.288	73.9736	77.1852	134.32	168.31	87.6218
MA0716.2	PRRX1	0	0	0	0	0	0	0	0	0	0	0	0	0	0	0	0	0	0	0	0	0	0	0	0	0	0	0	0	0	0	0	0	0	0	0	0	0	0	0	0	0	0	0	0	0	0	0	0
MA0717.2	RAX2	0	0	0	0	0	0	0	0	0	0	0	0	0	0	0	0	0	0	0	0	0	0	0	0	0	0	0	0	0	0	0	0	0	0	0	0	0	0	0	0	0	0	0	0	0	0	0	0
MA0718.2	RAX	0	0	0	0	0	0	0	0	0	0	0	0	0	0	0	0	0	0	0	0	0	0	0	0	0	0	0	0	0	0	0	0	0	0	0	0	0	0	0	0	0	0	0	0	0	0	0	0
MA0719.2	RHOXF1	0	0	0	0	0	0	0	0	0	0	0	0	0	0	0	0	0	0	0	0	0	0	0	0	0	0	0	0	0	0	0	0	0	0	0	0	0	0	0	0	0	0	0	0	0	0	0	0
MA0720.2	Shox2	0	0	0	0	0	0	0	0	0	0	0	0	0	0	0	0	0	0	0	0	0	0	0	0	0	0	0	0	0	0	0	0	0	0	0	0	0	0	0	0	0	0	0	0	0	0	0	0
MA0721.2	UNCX	0	0	0	0	0	0	0	0	0	0	0	0	0	0	0	0	0	0	0	0	0	0	0	0	0	0	0	0	0	0	0	0	0	0	0	0	0	0	0	0	0	0	0	0	0	0	0	0
MA0722.2	VAX1	503.491	262.225	550.042	882.555	304.47	255.59	269.507	233.568	525.925	202.374	544.828	539.34	617.143	215.629	243.739	290.453	590.551	287.457	241.792	218.809	211.465	190.378	528.69	231.532	220.292	193.402	622.602	374.826	336.309	317.03	1642.3	139.132	884.047	434.658	255.006	842.431	277.079	314.226	371.115	355.522	888.1	533.261	412.071	285.069	269.447	257.446	560.281	321.28
MA0723.3	VAX2	0	0	0	0	0	0	0	0	0	0	0	0	0	0	0	0	0	0	0	0	0	0	0	0	0	0	0	0	0	0	0	0	0	0	0	0	0	0	0	0	0	0	0	0	0	0	0	0
MA0724.1	VENTX	371.995	372.148	492.895	594.499	360.32	405.126	345.216	405.53	316.39	399.757	324.884	467.096	250.753	338.444	428.709	535.306	273.24	296.83	566.937	345.782	253.988	188.615	213.155	205.585	153.13	208.614	216.07	206.975	149.351	149.112	1126.91	68.0732	311.461	193.394	218.576	360.696	216.316	205.796	147.268	191.613	355.24	163.514	268.173	194.857	175.421	251.85	158.144	216.968
MA0725.2	VSX1	503.491	262.225	550.042	882.555	304.47	255.59	269.507	233.568	525.925	202.374	544.828	539.34	617.143	215.629	243.739	290.453	590.551	287.457	241.792	218.809	211.465	190.378	528.69	231.532	220.292	193.402	622.602	374.826	336.309	317.03	1642.3	139.132	884.047	434.658	255.006	842.431	277.079	314.226	371.115	355.522	888.1	533.261	412.071	285.069	269.447	257.446	560.281	321.28
MA0726.2	VSX2	503.491	262.225	550.042	882.555	304.47	255.59	269.507	233.568	525.925	202.374	544.828	539.34	617.143	215.629	243.739	290.453	590.551	287.457	241.792	218.809	211.465	190.378	528.69	231.532	220.292	193.402	622.602	374.826	336.309	317.03	1642.3	139.132	884.047	434.658	255.006	842.431	277.079	314.226	371.115	355.522	888.1	533.261	412.071	285.069	269.447	257.446	560.281	321.28
MA0727.2	NR3C2	1166.16	2209.71	1439.63	4550.24	1039.52	2161.38	1935.93	2201.83	1697.76	2164.4	794.961	815.861	906.848	3473.97	1722.26	1379.9	852.458	1565.39	1474.86	2071.1	1396.36	1960.19	3368.51	2423.11	2523.95	3485.59	3000.97	3514.79	2477.73	2741.78	2272.23	1188.89	2115.73	3232.17	2737.41	3911.98	3055.16	3089.15	3031.75	2611.01	2632.58	2800.36	3218.08	2836.26	2709.9	2017.6	2605.98	3219.06
MA0728.1	Nr2F6	18466.5	4758.46	6020.46	5221.79	3381.6	7663.45	7049.57	8121.68	6928.36	7187.91	2899.52	9100.27	3106.41	4891.97	5624.57	3624.22	3450.13	3752.56	5560.53	7629.17	3592.61	3472.64	4353.72	3165.61	3159.3	3431.26	4315	5107.48	4639.56	5034.87	9784.29	1487.46	7481.36	4769.75	4388.44	9755.74	3397.86	6441.63	4058.7	4637.94	9147.42	4734.53	4212.28	3846.63	3899.96	4155.52	6710.95	4531.3
MA0729.1	RARA	20520.3	9178.55	6267.63	5361	5451.63	7588.15	6681.31	7556.6	6801.8	7811.37	4502.38	9264.69	5038.18	6035.74	8039.07	4775.13	4845.29	4760.22	8088.15	7584.85	4656.83	5519.2	5578.94	4129.66	4051.22	4235.29	5246.5	5831.89	6337.23	5221.6	11571.8	2290.01	9046.54	6096.7	7206.51	11121.1	4362.78	8827.1	5344.84	5376.69	10346.4	6041.17	5196.67	6480.81	5029.67	5661.02	6124.69	5853.97
MA0730.1	RARA	9343.13	5202.79	12649.5	13928.3	7390.15	15737.9	13409.1	15562.2	14040.6	15700.3	14108	21696.9	17682.9	12022.3	13216.4	8048.43	16801.1	8305	12436.3	15077.5	9375.73	10269.8	16221.6	10927.9	10994.4	10939.2	16608.6	19256.2	25511.2	20148.9	30717	8856.09	29625	20802.3	17555	31659	15185.9	22748.2	18479.2	15726.1	37067.6	22318.9	19543.9	14673.8	14552.9	11862.1	29715.2	18880.4
MA0731.1	BCL6B	1088.3	1117.11	897.688	1136.47	898.997	989.483	848.845	736.159	1232.73	1083.11	1069.53	1022.63	1106.48	1029.86	1135.8	1828.96	1271.76	901.427	1021.42	714.723	1314.76	1346.75	772.056	884.214	799.228	986.568	773.051	1137.1	1088.44	1351.41	584.931	543.989	655.956	1579.7	2223.49	936.842	1081.58	624.026	1358.79	701.809	644.929	1589.47	1270.55	768.604	808.339	1130.53	1331.8	1408.21
MA0732.2	EGR3	106987	149423	100932	90571.4	127551	82292.5	122058	106954	79923.2	80810.8	108848	91936.9	138252	86730.3	92835.7	129845	147056	115994	49934.4	114272	137335	70124.4	86461.8	104675	152563	58418.3	95661.5	77144.8	69792.2	84913.1	84223.9	17776.1	98793	36704.6	56850.6	52506.7	87600.7	83172.5	61345.9	98361.8	86154.1	43136.7	73445.1	87866.2	96442.2	87814.4	66045.4	40748.3
MA0733.2	EGR4	165690	213255	122160	133743	188276	129680	180051	168411	131729	123400	191417	163431	233699	136499	146143	209394	239383	183102	43327.4	175562	200268	108071	125449	149354	200573	99962.8	134348	115227	97487.8	119667	128247	27431.7	149983	62550.5	87076.6	88782.1	113539	123015	89809.8	141175	127757	70446.4	104328	129147	140029	147895	92001.3	64571
MA0734.4	Gli2	31920.6	29287.1	19326.7	22699.5	19084.3	24484.7	22749.3	23127.6	27040	23293	26757	30223	28556.6	23192.3	31347.1	22256.9	27680.3	25296.2	32093.4	22588.4	28420.3	20231.2	31088.7	22023.5	27470.6	27269.7	30971.7	31524.5	28940.9	29405.9	26822.9	8802.94	26628.4	25436.1	27017.6	28478.1	25153.4	28778.2	26877.4	30586.4	25511.7	26038.5	28542.5	24032.4	31884.5	21105	27963.2	25460.4
MA0735.2	GLIS1	21058.4	14285.3	13741.1	15776.6	8892.68	12583.3	17131.2	13203.9	12252.1	12321.7	9151.39	11275.1	9201.16	11086.6	11932.1	12836.5	9908.41	11524.8	12707.2	12484.1	11669.7	13786.6	13959.1	14870	16610.5	11734.5	15350.6	15244.2	11896.5	12962	16187.8	3511.74	18099.4	8210.63	11411.5	12970.5	15560.2	14213.2	10919.4	15322.1	14994.1	9706.24	12157.7	15976.5	15984.3	11408.8	12267.4	7510.44
MA0736.1	GLIS2	107522	125560	86531.4	104102	75692.3	75402.2	93603	90643.3	76400	87557.2	65421.1	69506.4	79186.7	71923.6	87775.9	89452.7	80273.3	78274.2	84647	95812.4	93603.3	76250	98957.4	86920.4	116949	64696.3	108250	91501.8	63936.4	75657.4	91146.9	18503.4	99455.3	44562.9	66215.5	69294.8	75978	78552.1	54738.5	87453.8	82356.4	49257.4	61722.4	92981.2	94297.8	70229.7	66476.9	37397.8
MA0737.1	GLIS3	37784.3	48669.9	42452.3	47672	25139.5	34072.5	37658.6	36944.5	37119.2	38698.8	25303.6	30034.9	25805.6	28361.8	38307.3	30090.2	27385.7	29494	39941	36192.5	32255.4	30931.2	35744.5	29745.9	37256.1	28125.9	38466.9	36064.1	29436.2	31948.9	53891.3	8285.83	49763	21776.9	31248.6	34868.9	29377.7	31380.6	24521.1	33511.4	41224.7	24970.5	26773.2	36956.1	37737.9	26959.1	33280.2	18358.8
MA0738.2	HIC2	0	0	0	0	0	0	0	0	0	0	0	0	0	0	0	0	0	0	0	0	0	0	0	0	0	0	0	0	0	0	0	0	0	0	0	0	0	0	0	0	0	0	0	0	0	0	0	0
MA0739.2	Hic1	10580.2	5745.12	9009.74	8236.31	5219.23	8479.54	6773.48	7553.94	13246.6	8109.03	8973.14	7995.44	7213.4	9797.53	10968.3	8214.97	7274.22	12696.5	8720.87	6921.24	9305.62	8833.19	16206.5	9894.01	11799	11784.5	15120.1	18018.2	14049.8	13738.4	11764.1	6859.87	13539.1	18041.2	11904.6	17044.7	12458.8	17930.8	14061.1	17090.4	15634.8	17943.8	13586.9	10031.5	11459.9	9203.71	16426.6	17288.6
MA0740.2	KLF14	261966	285530	206734	193243	314204	114911	158711	148540	106784	123747	401349	437214	440942	135790	110549	370705	455996	362535	44518.8	146154	347434	260878	239936	236746	289971	255554	249438	233416	249427	246467	253408	74394.5	276763	200082	231946	246455	177122	260876	222663	281753	263235	206126	236642	235599	285734	274359	225832	193811
MA0741.1	KLF16	147845	164789	91025.1	93051.8	859868	186035	136167	109932	169289	169865	634363	359886	145676	159671	99722.2	451458	157866	439104	42935.6	127073	123028	419306	453972	341907	108894	391615	455332	294693	225690	296273	401389	20300.2	519171	162204	214285	218848	200734	327344	188656	329966	377212	177728	209293	368536	490155	481218	224708	148463
MA0742.2	KLF12	138373	182199	174306	133574	256236	235799	87820.3	78000.1	215372	116915	234112	268089	274349	61313.7	211930	231703	281662	261217	48751.1	77189.7	234643	162535	185637	185188	225596	180053	198060	168799	193954	186093	172006	52634.9	197990	131054	169473	169220	162052	195057	161924	211843	196758	144844	175184	175597	214196	193502	165877	132257
MA0743.3	SCRT1	3086.69	2567.29	2904.99	3492.57	5422.81	3261.69	3205.7	3052.33	4566.17	3381.83	8763.25	10034.5	2453.97	2935.37	3977.16	4002.9	2359.68	3219.83	4253.58	2929.97	3309.89	1972.53	3063.05	2233.49	2082.02	2757.61	2999.37	3860.58	2555.09	2756.55	3061.68	1134.55	2851.92	3356.63	2881.82	3885.35	2394.06	3292.73	2896.27	3135.06	3664.47	3398.43	2922.11	2098.32	2531.67	2468.13	2583.39	3277.47
MA0744.3	SCRT2	3351.41	2859.31	3177.86	3145.85	4988.62	3660.45	3181.01	3482.24	5326.7	3685.39	8855.26	4750.68	2772.89	3585.07	4215.95	3808.61	2564.93	3277.63	4627.97	3312.88	3558.13	2192.87	3110.04	2447.06	2503.8	2933.63	3039.39	3691.47	2465.91	2763.27	2501.29	1108.88	2559.33	3255.15	2927.36	3125.23	2734.33	3219.71	2766.67	3144.29	2905.35	3285.01	2964.62	2231.84	2593.42	2840.3	2470.43	3064.68
MA0745.3	SNAI2	9690.9	5492.16	11429.9	11569.5	8829.63	13838.4	11996.6	14526.4	22331.8	16517.5	9818.41	25149.7	8526.8	14140.1	14423.9	13504.6	9113.87	10131.3	16005.5	14962.9	13741.8	7262.57	13522.7	11971.8	11077.7	12460.3	12741.7	11426.5	15201.6	15855.6	9377.29	6880.17	9862.94	17824.8	12245.5	11786.8	11229	14412.4	15056.7	13971.5	11141.4	17305.9	14677.6	7756.4	11878.1	11176.5	15969.1	16719.1
MA0746.3	SP3	136295	141721	91042.7	92043.2	142984	165798	102788	200201	154094	158510	161744	185863	190504	157638	153518	149070	203710	162951	78875.9	98563.9	162140	84707.7	93853.4	93437.3	128308	108427	102675	85035.1	118711	104042	111141	27335.6	128437	68017.2	95009	96567.3	69257.6	112606	85643.1	125164	116557	79214.3	97472.8	99438.5	124814	111793	93154.6	66442.3
MA0747.2	SP8	80100	68838.8	234457	248496	881199	172426	64538.2	199531	170484	157699	649438	389820	84002.1	185390	215460	488185	361650	441520	63007.5	58476.7	289763	427693	455209	335257	56002.4	395707	454059	295828	204876	285325	415626	8247.01	533656	160841	201600	225283	184467	326890	179294	329636	384391	170202	197560	369702	488752	483697	212148	144576
MA0748.3	YY2	2122.97	2357.38	2968.8	3749.11	3666.25	3069.73	3731.96	3108.18	2776.48	2923.53	3475.98	2678.02	3466.72	3332.41	3121.6	4992.23	3567.23	3697.88	3078.54	2942.34	5010.81	4371.65	5842.45	4652.6	5308.49	2948.84	6065.97	4405.79	11513	4113.34	6035.42	1073.05	4402.93	2075.63	4060.57	4115.33	6448.16	5096.22	3609.05	5833.79	4945.87	2523.41	4222.09	5008.55	4816.36	2949.44	3734.45	2603.62
MA0749.2	ZBED1	98.6219	203.291	797.204	105.066	106.294	116.659	110.272	128.972	71.6356	95.742	80.5023	70.9986	83.9899	83.9079	89.0825	109.044	55.4035	107.796	173.25	142.146	545.902	192.141	292.038	177.641	166.562	132.556	332.908	210.761	358.873	222.996	797.633	102.11	363.372	264.241	226.382	324.385	194.441	190.306	335.771	240.093	365.812	210.653	256.727	229.138	151.564	111.933	314.029	179.416
MA0750.4	ZBTB7A	34773.7	36293.7	38625.8	50298.7	27641.9	59199.3	53591.2	55958.7	35896.6	70558.7	28985.2	36626.5	31409.8	40561.7	62933.7	36457.3	34097.1	27955.2	37804.6	57678.2	43228.6	53915.8	74609.1	56671.5	61456	41907.4	83145.4	60454.3	78254.8	73631.7	83321.9	21908.8	65691.6	50123.5	67272	50269.9	72879.1	53982.7	62859.8	51282.9	78546.1	56609.6	63146.6	59344.8	64975.9	39260.6	86648.1	46080.7
MA0751.2	ZIC4	38426.2	49199	37804.3	50607.7	27696	45296.1	56990.3	51677.4	41672.2	49322.1	26123	33036.8	33474.2	39578.3	53682.7	33581.6	32819	46455.5	45041	54947.8	49612.8	53378.2	78501.3	66190.3	75652.7	43183	85675.8	62154.3	53572	57786.9	52431	15717.8	61980.8	34749.6	47233.3	46435.4	74952.3	62011	49664.6	70677.3	59422.3	38819	55963.2	64079.2	68518	40819.2	50336.1	32405.4
MA0752.2	ZNF410	6664.76	3324.17	7482.01	8928.87	4570.65	5564.12	3596.59	4274.24	5484.9	5069.79	6021.86	4413.12	4444.16	3544.76	4686.11	4587.77	4291.25	5397.63	6593.65	4565.84	3956.93	5015.05	5654.47	3397.14	3389	4711.19	5689.85	5322.03	13718.8	8553.11	25342.2	16098.1	14278.5	9914.79	5560.68	13810.5	3696.82	8481.89	7630.44	7265.11	14943.3	11338.4	5844.21	6733.4	4871.09	4253.46	11206.8	10433.2
MA0753.3	ZNF740	805343	35998.4	18978.1	17485.6	818206	194041	14289.2	14401	198180	179706	673550	483058	23344.3	210493	226039	301995	400819	545340	12025.2	14735.7	22938.2	837726	422340	809858	655222	756883	439320	355242	448864	594584	907888	1236.66	527221	356540	487996	527181	399723	683880	381644	712050	781217	382955	429963	816538	454339	1.06955e+06	473973	300691
MA0754.3	CUX1	901.439	123.166	354.789	138.337	73.8655	90.1458	75.2975	86.4244	60.2933	75.3231	106.378	79.7177	71.8175	74.5327	63.7187	151.67	164.951	79.6755	120.552	77.4616	77.001	132.207	28.5325	59.879	40.2972	78.2301	32.0104	63.1021	90.2555	37.6138	134.984	28.0653	62.9215	55.529	54.644	65.3611	70.485	50.8958	39.2714	57.7146	61.3212	107.536	65.4081	115.471	64.5549	72.7566	37.2768	60.5007
MA0755.2	CUX2	641.907	107.936	350.979	92.8084	64.8575	89.6155	239.882	83.322	38.2056	142.479	93.4402	62.2795	77.9037	53.9073	45.7785	80.296	61.6993	70.302	82.1473	69.8752	58.6127	91.6636	55.3866	51.8952	51.0432	54.3264	38.4125	61.84	62.3193	34.9271	57.2659	74.6417	92.8092	99.5692	94.9765	48.4156	63.1935	53.1086	31.4171	36.9373	57.0921	72.1817	47.4209	82.9947	37.8909	123.126	59.8687	91.7942
MA0756.3	ONECUT2	373.725	161.573	259.544	155.848	120.707	166.505	112.74	187.918	90.7384	311.275	148.067	129.541	124.159	150.003	125.582	136.8	110.807	126.543	181.344	155.722	236.749	213.294	159.446	149.698	158.502	128.21	166.454	186.782	186.958	196.129	783.316	123.01	229.663	237.434	161.33	292.914	148.262	245.627	186.539	166.218	300.262	232.749	184.778	317.545	161.387	142.715	258.678	210.709
MA0757.2	ONECUT3	787.245	435.718	773.869	152.346	1163.83	143.173	163.762	184.815	128.347	120.245	211.319	206.768	175.283	639.387	1064.66	310.279	198.949	179.661	611.024	146.938	113.778	163.937	109.095	161.673	130.294	136.903	121.639	152.707	262.171	112.841	237.244	78.2245	157.304	224.031	201.662	150.088	138.54	97.3658	153.159	126.972	135.329	273.996	183.143	156.968	134.723	165.101	250.771	227.399
MA0758.1	E2F7	3204.35	12455.7	4057.46	7879.96	8134.21	7399.38	7502.18	5753.65	5429.38	8787.85	5971.55	5260.12	6864.05	4594.31	4631.67	7346.59	6083.05	5488.24	5209.03	6646.53	4363.77	4477.41	4627.3	5447	4562.99	4435.21	5084.85	5877.33	15481	7714.86	8982.57	2725.92	9733.95	11067.5	16659.9	5935.75	5206.17	4087.15	5539.24	3908.43	8145.14	17965.9	9750.71	6289.56	4730.75	5680.61	28022	8657.86
MA0759.3	ELK3	10651.2	1328.34	1758.71	1497.19	2394.32	1863.37	1984.07	1843.72	1446.44	1424.33	2182.19	1426.2	2275.03	2222.39	2037.14	1907.28	1891.27	2015.32	3348.23	1888.63	2922.59	1644.66	971.783	1634.7	1251.9	588.899	1250.01	1124.48	1706.26	1546.2	2288.59	420.382	1860.9	702.729	1329.67	1638.87	1431.57	1914.12	1288.1	2359.37	2380.95	1337.57	1427.53	1461.43	1156.37	1172.5	1520.44	715.578
MA0760.2	ERF	4079.83	1013.81	4006.5	1383.37	1697.1	2355.46	2401.7	2228.86	1650.01	2125.38	986.154	879.386	1637.2	1690.81	2071.79	1257.97	1276.8	2127.81	1723.89	2099.85	1473.36	967.756	505.193	750.484	599.086	478.073	606.597	865.76	1164.73	781.829	2351.99	279.459	1226.97	631.881	710.372	1273.33	775.335	1177.24	828.627	1433.63	1607.04	869.127	878.104	932.789	668.003	657.607	882.217	636.301
MA0761.3	ETV1	6858.55	4698.2	11377.5	7640.06	7163.15	11830.3	9369.39	10479.5	11394.2	11212.3	6911.7	6652.69	6819.01	10998	9192.2	7883.87	6992.17	9334.54	8970.76	9766.15	12147.8	7047.52	7686.99	6914.03	5104.32	6834.27	7620.07	8267.63	8435.67	6351.36	6831.01	2638.73	6153.72	7649.59	9284.28	7226.03	7529.74	7189.58	7398.74	7579.08	6916.6	7184.29	6988.86	6549.37	6355.85	7628.25	5763.21	7685.68
MA0762.2	ETV2	3503.67	930.37	17797.1	1122.46	1643.06	1211.67	1470.56	1163.85	1047.67	1054.07	800.711	722.442	1420.53	1056.58	1459.34	1175.69	989.707	1252.94	1281.64	1147.95	1251.55	1441.94	453.163	756.472	482.224	454.169	520.169	723.15	990.662	664.958	1812.06	273.487	852.586	593.585	554.247	985.257	595.477	969.232	628.343	1082.73	1220.08	942.782	773.451	1232.29	575.38	752.751	783.942	617.525
MA0763.2	ETV3	6772.04	1036.32	3202.63	1016.51	1848.44	1438.62	1496.9	1478.97	1796.26	1172.5	1746.61	942.911	1674.93	1580.19	1719.79	1142.98	1327.17	1531.02	1918.84	1502.52	2102.01	969.518	481.696	940.101	697.142	454.169	630.605	819.065	1278.62	933.628	2116.79	246.019	1211.24	492.101	1044.74	1203.13	746.169	1148.47	663.687	1579.07	1702.19	1012.02	873.198	867.836	732.558	786.331	821.218	531.989
MA0764.4	ETV4	11457.4	1124.39	3292.16	1627.65	2788.87	1754.66	2048.67	1903.11	1552.1	1485.14	2041.31	1317.83	2148.44	2184.89	1988.89	1824.01	1793.06	1896.59	2162.7	1915.38	2685.84	1434.89	861.01	1431.11	858.331	475.9	1105.96	1060.11	1691.22	1265.44	2642.41	321.258	1731.91	551.46	1143.62	1537.2	1224.98	1681.77	964.114	2116.97	2243.51	1022.33	1151.18	1264.77	978.147	1082.95	996.306	615.438
MA0765.4	ETV5	10988.6	1020.43	1668.7	1139.97	2255.6	1567.48	1756.12	1640.73	1358.09	1241.92	2015.43	1246.83	2096.1	1947.69	1813.2	1748.67	1707.43	1812.23	2232.96	1684.99	2574.36	1387.29	819.05	1277.42	850.272	467.207	1067.55	917.504	1493.51	1249.31	2092.25	342.158	1684.72	559.119	1129.31	1486.36	1149.63	1595.47	916.988	2112.35	2173.73	1216.78	1167.53	1183.58	927.626	987.811	1095.71	592.49
MA0766.3	GATA5	2238.89	814.487	1572.03	1099.69	1104.38	1106.14	799.881	809.287	873.954	890.718	1315.35	1132.24	1468	706.42	609.349	1017.08	1395.16	782.695	1354.48	780.606	653.933	754.462	872.759	868.246	730.723	808.378	856.278	792.562	631.789	689.138	1517.55	249.602	679.552	831.02	594.579	1261.23	719.433	882.931	710.813	805.696	852.153	914.793	727.665	833.556	739.574	811.516	908.197	830.321
MA0767.2	GCM2	7169.98	7526.39	15551.2	9059.33	6478.54	11812.8	12008.1	12489.9	9654.69	11472.7	10231	9597.26	8528.02	9762.85	8702.24	7776.81	9513.03	7067.69	11501.7	11884.4	9582.6	10317.4	9674.19	9065.69	12664.1	8609.66	9415.86	10111.5	8536.67	9557.93	25663.3	3097.33	18936.2	8683.58	7661.87	11680.3	11314.1	11679.5	9065.81	12955.8	13137.5	7845.71	8803.93	14502.4	10459.3	8089.97	9724.72	8831.02
MA0768.3	Lef1	2610.88	1773.33	2259.7	1102.32	2311.45	1473.62	1670.12	1390.33	1297.8	1378.96	1842.93	1600.58	1866.04	1854.88	1495.22	1954.86	1903.86	2082.5	1708.56	1316.45	1957.2	1353.8	1158.08	1405.16	1112.2	2005.73	1131.57	1351.65	885.364	1176.77	1388.7	456.21	1053.93	1589.28	1418.14	1583.19	1283.31	1128.56	1345.05	1223.55	1365.98	1386.18	1303.26	2903.01	1108.66	1810.52	2009.56	1564.67
MA0769.3	TCF7	1468.95	748.269	1114.37	546.344	891.791	522.315	615.958	516.331	702.029	476.441	738.896	615.321	654.878	557.823	627.289	769.255	661.064	988.914	741.909	485.932	818.279	535.879	424.631	590.807	448.642	1138.68	411.334	589.373	383.586	545.4	566.524	213.177	456.181	672.092	761.113	588.25	464.229	526.66	634.234	526.357	501.142	612.808	549.428	2098.32	484.162	727.566	467.654	657.163
MA0770.1	HSF2	863.374	509.882	439.558	288.932	736.853	510.649	398.295	484.863	317.584	471.904	576.454	554.287	572.105	452.821	784.42	733.568	616.993	1032.66	482.034	416.057	783.801	290.856	310.501	391.21	318.348	338.997	307.3	367.254	1164.73	940.345	333.37	314.092	391.686	993.777	840.477	462.369	430.202	606.323	1081.93	510.197	482.111	1278.65	1012.19	362.651	336.808	472.918	1249.34	949.236
MA0771.1	HSF4	937.773	899.909	556.233	477.175	711.631	787.45	672.328	793.775	432.798	752.324	605.205	809.633	548.978	699.857	655.746	828.734	547.739	1082.65	658.212	652.834	959.639	475.945	500.158	630.726	472.821	530.226	497.762	565.395	1472.02	1457.53	496.986	457.404	456.181	1445.67	2197.47	542.255	673.253	659.432	1610.13	517.123	509.6	1568.85	1365.39	561.117	486.968	587.649	1249.34	1418.64
MA0772.2	IRF7	546.746	2038.21	741.962	422.016	1235.9	799.646	845.554	711.34	706.804	706.041	1014.9	769.774	968.927	474.384	612.442	1056.73	1116.88	971.729	595.008	679.586	748.173	1045.32	637.785	938.105	1147.13	1147.37	689.824	878.381	950.906	844.967	627.88	367.834	649.664	1238.87	889.917	566.462	537.144	679.348	907.17	607.158	682.991	1244.77	1069.42	1618.4	798.516	990.609	934.178	1604.31
MA0773.1	MEF2D	375.455	442.34	1657.75	1784.37	540.479	758.816	501.572	625.358	632.184	1121.68	273.133	267.802	271.446	191.254	254.256	376.697	255.612	298.393	282.607	673.597	262.033	280.279	219.868	211.573	201.486	195.575	288.094	233.478	241.756	201.502	413.133	75.2388	188.764	302.537	221.178	150.088	221.177	223.499	255.264	230.858	226.254	406.575	256.727	239.963	179.631	291.026	363.731	229.486
MA0774.1	MEIS2	4242.47	2716.95	4948.95	3229.03	3482.49	5123.99	4846.61	4458.17	5962.47	5060.71	2681.02	2493.67	1898.9	4689	3848.49	2600.2	2111.63	3296.38	4023.15	4529.11	3099.58	3618.95	10426.1	3578.77	3810.77	5084.96	8886.09	6295.06	6078.28	6180.75	4002.48	2685.91	3525.18	6619.44	5137.84	4751.99	4112.44	4826.25	6542.62	4483.27	4112.75	6973.64	6738.67	4140.72	5104.05	4065.97	5435.63	6544.51
MA0775.2	MEIS3	1870.36	772.77	759.106	600.628	709.829	681.396	1296.52	600.982	2500.08	617.105	868.275	500.727	667.051	657.669	668.118	769.255	600.624	787.382	802.184	622.887	1022.85	486.522	349.103	439.113	398.943	571.514	358.516	498.506	412.597	478.232	388.59	173.169	336.63	651.029	519.118	416.374	415.618	378.399	620.489	464.025	386.958	654.055	488.926	478.122	482.758	685.591	464.265	527.817
MA0776.1	MYBL1	359.883	280.766	918.642	486.806	279.248	385.506	454.665	362.096	234.607	1614.91	227.132	221.715	254.404	313.6	274.052	310.279	391.602	257.774	360.449	367.743	273.526	453.029	537.082	680.625	538.64	454.169	534.574	459.383	176.213	239.116	558.343	108.678	408.99	312.111	232.888	387.325	884.708	473.552	302.39	470.951	376.385	335.866	358.109	505.185	596.431	489.708	290.307	210.709
MA0777.1	MYBL2	602.113	417.839	563.377	573.486	547.686	361.644	516.796	356.335	259.679	328.518	291.821	246.627	663.399	397.976	335.915	516.472	265.685	245.276	402.814	383.315	314.899	384.282	375.957	554.879	459.388	469.38	388.926	424.046	205.224	347.928	406.997	92.5557	305.169	331.259	258.909	336.488	529.853	285.459	274.9	404.002	274.888	396.263	397.354	364.455	703.087	363.783	333.232	225.313
MA0778.2	NFKB2	44381.6	29475.2	29861.4	48228	17664.7	38880.4	45713.4	37695.7	39159	37832.6	23311.2	27881.3	28354.5	39449.4	44320.4	36356.2	30047.6	19464.3	47413.8	38438.5	35949.1	46055.6	69975.1	49506	67758.5	55888.9	71938.6	79651.2	77670.2	64859.6	33746	23333	38951.5	54734.3	60691.3	32564.3	63071.9	46107.1	65182.7	44645.7	36585.5	58934.2	70395.5	63290.7	67276	40130.8	72776.7	45440.2
MA0779.2	PAX1	1806.34	709.862	1843.48	1069.92	1378.22	1781.17	1566.43	1845.94	1852.38	2034.18	1645.99	1487.23	1651.8	1490.19	1842.89	1402.7	1581.52	1420.1	1561.31	1704.16	2110.06	2508.41	3311.45	2614.72	2877.22	2199.13	3333.88	2566.99	5225.15	2752.52	2259.96	916.6	2444.5	2012.45	2214.38	2251.33	3592.3	2881.14	2778.45	2957.3	2645.27	2227.32	2845.25	2702.74	2750.6	1905.66	2621.8	2096.66
MA0780.1	PAX3	173.021	215.21	1560.6	189.119	243.216	189.306	499.514	276.115	77.0083	112.985	159.567	188.084	110.769	133.596	90.3197	184.383	142.286	149.977	661.311	182.075	111.479	82.8497	102.381	99.7984	79.2512	69.5379	222.472	118.632	101	88.6611	425.404	83.5987	473.484	139.78	148.32	254.182	106.943	106.217	106.033	87.7262	257.972	163.514	107.923	119.079	85.6054	72.7566	361.472	168.985
MA0781.2	PAX9	2500.15	688.01	2139.69	1161.86	963.855	1790.19	1840.47	2107.43	2091.76	2060.5	1880.3	1746.32	1890.38	1539.87	1794.64	1374.94	1888.75	1409.16	1705.8	1978.47	2277.85	2252.81	3247.67	2746.45	2975.28	2186.1	3284.27	2414.29	5047.86	2817	2319.27	911.226	2667.87	2079.46	2495.41	2159.34	3373.56	3024.98	2951.25	3169.69	2579.72	2359.9	2904.12	2677.48	2687.45	2406.56	2804.79	2232.27
MA0782.3	PKNOX1	4121.36	2456.04	7375.33	5279.57	2603.31	4902.34	4108.44	3926.77	5101.05	4580.19	4144.43	2661.82	2483.18	4638.84	3786	2879.75	2401.24	2918.31	3551.28	3796.42	2624.93	10562.5	4306.73	3069.8	3777.19	13118.8	4161.35	5494.93	7938.19	6845.71	3057.59	3296.77	3358.43	7795.12	5468.31	4655.16	3538.83	4558.49	6711.49	3552.91	4167.72	7561.41	6781.19	3778.06	11657.8	5073.37	8331.92	7817.11
MA0783.1	PKNOX2	2572.82	1964.04	3287.4	1850.91	1262.92	2316.75	2143.3	2013.02	5686.07	2365.42	1733.68	1116.05	1003.01	2868.81	3850.34	2066.88	1018.67	1821.6	3272.97	1908.59	2327.27	1369.66	2066.09	2021.92	2052.47	2890.17	1975.04	2264.1	2980.58	3756	1521.64	1462.98	1807.42	3391.1	2164.94	2125.44	1869.07	2449.64	3157.42	2350.14	1945.36	3592.88	2962.99	1445.19	2319.77	2154.71	2367.64	3398.47
MA0784.3	POU1F1	347.772	386.716	439.082	541.091	452.201	199.912	188.449	183.929	284.752	181.501	287.508	222.96	378.563	173.441	242.502	648.316	260.648	306.204	399.542	195.251	317.198	185.09	208.119	217.56	175.965	239.036	150.449	142.611	202	170.605	631.97	72.8503	391.686	264.241	156.126	215.449	196.872	185.88	239.556	159.292	255.857	234.222	184.778	189.445	181.034	209.875	351.305	252.434
MA0785.2	POU2F1	352.962	369.499	407.651	301.19	529.67	276.27	258.809	301.821	335.493	223.701	323.447	230.434	223.973	592.043	274.671	648.316	258.13	396.815	516.133	311.044	427.528	255.6	258.471	241.512	217.605	236.863	225.673	176.686	188.032	193.442	758.773	59.1162	687.417	260.412	145.717	285.652	233.33	272.182	261.155	283.956	300.262	265.157	233.834	218.312	213.312	240.656	323.065	289.986
MA0786.2	POU3F1	368.534	407.244	343.836	375.611	491.836	198.321	174.871	193.236	232.816	174.241	268.82	198.049	191.107	175.316	216.52	591.811	224.132	323.389	405.398	198.446	339.034	216.82	196.371	183.629	167.905	182.537	144.047	162.803	168.692	162.545	519.484	68.0732	383.821	250.838	147.018	191.242	172.567	203.583	204.212	196.23	236.827	231.276	170.061	169.598	172.614	223.866	268.844	250.348
MA0787.1	POU3F2	311.438	324.471	336.216	304.692	417.971	177.11	160.881	166.644	271.618	152.915	254.445	199.294	344.481	509.072	206.622	536.298	217.836	285.895	395.065	174.089	286.168	174.513	213.155	197.601	169.248	182.537	158.452	142.611	212.745	155.828	523.574	66.879	368.091	279.56	157.427	208.187	179.858	177.029	210.102	166.218	230.483	263.684	166.791	185.836	158.581	193.085	342.269	250.348
MA0788.1	POU3F3	233.578	259.577	302.404	293.31	309.875	128.325	121.793	119.665	171.925	97.1033	211.319	161.927	310.398	481.416	134.861	463.932	192.653	203.095	311.023	115.394	217.212	126.919	182.944	147.702	122.235	102.134	118.439	93.3911	246.054	123.588	456.082	57.3248	295.731	260.412	134.008	147.668	140.97	121.707	178.685	101.578	181.849	293.146	158.615	117.275	126.303	131.522	372.768	248.262
MA0789.1	POU3F4	318.358	476.773	437.177	405.38	535.074	292.709	278.148	313.787	379.072	241.851	415.45	291.468	277.532	623.45	295.704	665.168	336.198	435.872	517.166	319.429	464.304	296.144	268.541	273.448	235.067	249.902	238.477	195.616	200.926	206.876	750.593	71.656	715.732	271.9	153.524	317.122	240.621	307.587	290.609	302.425	321.407	265.157	240.375	239.963	225.942	277.035	314.029	304.59
MA0790.2	POU4F1	176.481	281.429	1307.72	282.803	223.398	109.236	113.152	113.017	131.332	93.4733	171.067	127.05	137.549	140.159	127.437	567.028	162.433	178.098	152.412	129.369	120.673	93.4263	124.2	123.75	104.773	117.345	136.044	97.1772	122.49	95.3778	239.29	48.3678	102.247	111.058	255.006	116.197	77.7766	108.43	119.778	92.3434	135.329	141.417	112.829	122.688	116.48	111.933	196.55	102.225
MA0791.2	POU4F3	188.593	319.173	1291.53	284.554	241.414	111.887	116.032	125.426	134.317	95.2883	172.505	138.26	159.459	127.502	134.242	290.453	161.174	185.91	162.228	147.337	133.315	95.1891	132.592	143.71	115.519	141.249	132.843	112.322	133.234	100.751	255.651	50.1592	106.966	130.206	256.307	145.247	89.9292	112.856	121.742	90.0348	148.017	160.568	121.005	120.884	122.093	111.933	201.069	102.225
MA0792.1	POU5F1B	365.074	392.676	423.366	327.456	556.694	301.193	300.779	318.219	358.178	245.027	347.885	261.574	255.621	609.387	290.755	695.898	284.572	418.687	549.026	325.019	480.394	283.805	258.471	269.456	248.5	267.286	230.475	204.451	191.256	202.846	631.97	73.4474	709.44	291.048	173.039	302.598	264.926	298.736	278.827	325.51	310.835	278.415	246.916	236.355	239.976	285.43	350.176	335.883
MA0793.2	POU6F2	1361.67	462.205	1121.52	1252.91	421.574	539.284	508.567	502.148	618.454	469.181	667.019	584.181	679.223	456.103	511.606	468.889	614.475	360.883	481.001	412.863	363.169	676.9	584.077	405.182	380.137	462.861	645.01	575.491	492.108	451.365	1634.12	171.377	789.664	595.5	418.938	837.59	495.826	555.428	565.509	600.232	803.519	499.38	531.441	566.529	502.405	428.144	632.575	621.697
MA0794.1	PROX1	657.479	464.854	808.634	374.736	792.703	541.405	526.26	552.673	444.141	431.974	529.015	519.411	660.964	567.198	476.962	1781.38	589.292	774.884	503.733	1124.79	749.323	440.69	699.885	852.278	557.445	519.361	712.231	579.277	494.256	1227.82	456.082	147.492	788.091	409.765	503.506	668.135	673.253	513.383	392.714	554.06	539.203	378.586	516.724	503.381	530.473	721.969	298.214	344.228
MA0795.1	SMAD3	730.148	976.061	766.25	288.056	522.463	664.428	689.61	764.524	763.516	671.102	382.386	450.903	771.734	1338.31	635.95	516.472	734.096	1020.16	931.347	669.205	530.962	222.108	1725.38	399.194	287.454	369.42	1683.75	275.125	200.926	317.03	239.29	100.319	157.304	285.304	219.877	217.87	289.232	223.499	253.301	212.39	196.651	344.705	304.148	290.482	367.682	514.893	221.401	285.814
MA0796.1	TGIF1	1074.46	958.182	1422.01	1178.49	1160.23	1244.54	1107.65	1107.56	3387.77	1666.64	1273.66	868.176	686.526	1562.84	1448.83	992.299	624.548	1224.82	1227.9	1004.21	1199.84	893.72	1228.58	1167.64	1351.3	1934.02	1155.58	1487.95	2004.96	1667.1	1088.05	854.498	1108.99	2202.01	1664.04	1505.73	1049.98	1469.34	2077.46	1532.9	1338.49	2432.08	1944.26	988.72	1622.29	1348.8	1737.32	2157.16
MA0797.1	TGIF2	3379.1	1099.89	1368.2	1439.41	1394.44	1449.23	1313.39	1280.41	4106.51	1766.01	1362.79	863.193	781.472	1784.1	1808.87	1305.55	737.874	1427.91	1957.41	1152.34	1551.51	1177.52	1596.14	1481.01	1693.83	2255.63	1501.29	1732.78	2231.68	1981.44	1233.26	1025.88	1376.41	2506.46	1751.21	1592.87	1382.96	1801.27	2570.32	1763.76	1552.06	2822.45	2464.25	1188.99	1936.65	1583.85	1841.25	2561.89
MA0798.3	RFX3	1147.13	1258.81	1092.47	1174.99	1498.93	1232.35	1173.9	1255.15	2021.91	1275.5	777.71	830.808	831.379	1366.9	1786.6	1720.91	866.309	1399.79	2057.3	1236.99	2008.92	1857.95	2141.62	1958.04	2017.55	1451.6	2127.09	2497.58	1897.51	1778.59	2472.66	588.774	2715.06	2466.25	1500.11	2854.1	2853.43	2925.4	1857.54	2248.56	3795.57	3544.27	1815.07	2226.42	2029.27	1575.46	1960.98	1990.27
MA0799.3	RFX4	2578.01	1232.33	5974.27	4414.53	2363.7	2075.47	2668.74	1893.36	2489.93	2133.55	1216.16	1138.47	1286.63	3023.5	2135.5	2475.3	1163.47	2216.86	1909.36	4245.62	2644.47	1933.75	2868.35	2752.44	3067.96	2483.81	2844.12	2854.74	9304.91	2838.5	1897.96	851.513	1917.53	2190.52	2486.3	2294.9	2724.61	2781.56	3261.49	2793.39	2148.35	2272.99	2344.88	2249.88	2941.46	2269.45	1624.36	2121.7
MA0800.2	EOMES	3877.4	1383.97	3362.64	2740.47	2406.93	2880.95	3862.8	2787.3	2547.24	2860.01	2633.58	1981.73	2976.17	2825.21	2541.32	2084.72	2410.05	2337.15	2081.24	2812.18	2722.62	2177.01	2151.69	2057.84	2090.08	2648.96	2056.67	3198.01	2675.43	2679.98	2879.66	1302.35	4412.37	2962.18	2615.11	3217.22	1728.1	2398.74	2821.65	2569.45	2531.08	2915.26	3128.14	2733.41	2989.17	2367.39	2798.02	2993.74
MA0801.1	MGA	12384.8	3039.43	5857.12	3835.79	3114.96	4658.42	5112.82	4294.19	5283.12	4675.93	3336.53	7961.81	3584.79	4818.37	3915.92	2791.52	3084.97	3026.11	3510.12	4406.53	4023.59	3670.07	4120.43	3335.26	3762.42	4843.75	3810.84	5592.11	4460.13	4924.72	4386.98	2371.22	4179.56	5405.46	4738.42	4834.3	2851	3905.7	5272.19	4342.45	3949.93	4903.94	5491.01	4544.86	4925.82	3718.98	4623.45	5457.58
MA0802.2	TBR1	2185.25	1390.59	2950.7	1654.79	2484.4	2657.71	3628.68	2539.55	2469.64	2759.73	1503.67	1581.9	1183.16	2420.67	2577.2	3258.43	1174.81	2151.24	2164.76	2553.44	2434.15	2032.46	2009.02	1828.31	1837.55	2427.31	1890.21	3073.07	2237.05	2262.2	2564.7	1047.97	2309.22	2470.08	2231.3	2883.15	1506.92	2069.02	2417.16	2285.5	2156.81	2542.57	2411.92	2552.99	2690.25	2182.7	2279.53	2710.02
MA0803.1	TBX15	14518.2	4153.22	9008.31	6092.96	5530.9	8253.64	7824.77	7444.47	9065.48	7931.16	7141.71	15551.2	7269.39	12742.3	6731.91	5988.49	6419.25	5755.39	7414.09	7312.94	6241.68	6723.17	7386.56	6628.61	6867.99	8659.64	6965.46	9716.46	8297.06	10290.1	7796.35	4276.67	7084.96	10454.8	10299.1	9082.77	6134.63	7667.56	9839.46	8297.05	7424.09	10243.9	9925.68	7799.7	7958.49	7639.44	8410.99	10767
MA0804.2	TBX19	998.33	330.43	1004.84	758.227	580.114	414.671	370.315	383.37	665.017	353.928	587.955	769.774	546.543	450.946	405.82	379.671	554.035	407.751	488.062	339.394	439.02	475.945	678.066	552.883	539.983	538.918	598.594	718.102	759.651	1532.76	533.8	455.613	575.731	917.185	504.807	1084.51	631.935	1009.06	948.405	701.809	936.734	864.708	755.464	510.598	665.196	489.708	913.846	890.821
MA0805.1	TBX1	13384.9	2347.45	5724.25	3932.97	3215.85	4981.88	5420.18	4466.59	5192.39	4911.88	3500.41	7821.05	3464.28	5328.85	4023.56	2987.8	2994.31	2866.76	3379.4	4547.48	3673.06	3437.38	3809.93	3119.7	3530.04	4574.29	3578.76	5144.08	4540.71	4849.49	4296.99	2362.86	4012.82	5367.16	4729.31	4500.23	2748.92	3932.25	5338.95	4063.11	3723.67	5015.89	5387.99	4337.38	4605.85	3646.22	4508.23	5513.91
MA0806.1	TBX4	13384.9	2347.45	5724.25	3932.97	3215.85	4981.88	5420.18	4466.59	5192.39	4911.88	3500.41	7821.05	3464.28	5328.85	4023.56	2987.8	2994.31	2866.76	3379.4	4547.48	3673.06	3437.38	3809.93	3119.7	3530.04	4574.29	3578.76	5144.08	4540.71	4849.49	4296.99	2362.86	4012.82	5367.16	4729.31	4500.23	2748.92	3932.25	5338.95	4063.11	3723.67	5015.89	5387.99	4337.38	4605.85	3646.22	4508.23	5513.91
MA0807.1	TBX5	14404	4533.32	10167.5	5543.99	5741.69	9083.51	8994.14	8369.43	10706.5	8960.27	6201.55	10076.8	5762.44	9685.97	7782.96	8214.97	5405.62	5481.99	7071.38	8226.1	6670.35	5520.97	7421.8	5588.71	6161.45	8776.98	6967.06	8583.14	8863.31	8602.81	7113.25	4394.31	7212.37	9547.15	7829.71	8027.31	4610.69	7457.34	9340.71	7826.1	7066.73	9055.13	9309.21	6915.63	8752.8	6321.43	8998.38	9901.26
MA0808.1	TEAD3	1868.63	1329.01	3956.97	2963.74	2050.22	1815.11	1677.53	1934.13	1257.8	1931.63	1781.11	1604.32	1497.21	1695.5	1490.89	5450.21	1522.34	1959.08	1616.25	1788.8	3548.94	1741.61	975.14	756.472	789.826	1010.47	776.252	954.103	1406.48	1653.66	1022.61	702.229	1135.73	1976.07	2344.49	1273.33	1193.38	1263.54	1898.77	1399	1194.71	1950.38	2001.49	1066.3	842.02	758.347	1585.96	2152.99
MA0809.3	TEAD4	2816.78	3453.29	5273.74	19750.7	4039.18	3578.79	3073.62	3443.68	2793.79	3763.43	3107.97	2935.85	2675.51	4110.55	3581.24	6917.35	2684.55	5625.72	3709.03	3277.35	4916.57	2473.15	1955.31	1772.42	1758.3	2359.94	1803.79	2219.93	4932.89	4431.71	2372.45	1990.84	2189.67	6167.54	5083.2	2844.42	3891.26	2327.93	5388.04	2310.89	2482.45	6702.59	5229.38	2536.75	1887.53	1964.43	5993.65	6809.46
MA0810.2	TFAP2A	76347.2	58339.8	91020.4	105555	48866.5	90123.5	104124	99276	72591.3	97782.1	43520.1	70931.3	51044	93654.8	91422.7	56529.4	51765.7	57835.1	70454.1	106091	96299.5	86632.6	151763	140255	145689	93039.5	167347	111848	118844	126976	76302.7	35223.1	92839.1	84172.3	102577	67249.3	150573	111524	115364	123671	92463.8	91959.5	128892	111411	132860	89932.7	111092	84636.4
MA0811.2	TFAP2B	39578.5	45176.2	85109.4	82818.4	32900.8	67314	72248.1	69874.8	51996.7	72622.8	26979.8	58403.2	32695.2	69371.7	71475.7	30525.4	33031.8	36746.1	50603.1	72199.4	66258.8	56857.8	98792.9	97357.3	93057.1	65183	107771	77481.8	84146.1	84906.4	44197	25040.8	56284.8	60978.5	70593.6	43404.6	109680	72858.4	79279.2	77473.8	55628.9	66075.8	88392.5	72595.1	89078.7	62884.1	75509.2	61552.2
MA0812.2	TFAP2B	34066.1	31122.7	27713.6	31261.5	22563.2	46039.6	45939.7	52142.8	36568.2	45353.1	18476.7	29887.9	18825.9	47668.1	43088.1	20548.8	20528.2	32717	24952.1	51814.2	43615.9	36772.9	53369.2	67318	58719.8	42872.3	59318.5	39861.6	49270.9	49545.4	29399.9	15600.7	38655.8	36011.5	39674.2	27587.2	71357.6	47379.5	52881	52042.4	38160.8	39442.2	56357.3	46412.1	54859	40368.7	45153.5	41532.7
MA0813.1	TFAP2B	68853.7	37172.4	48384.2	73593.6	40799	54097	62528.6	58258.5	46979.2	61420.1	38221.4	40698.4	50127.4	50241.6	80160	37928.4	42769	35368.1	56220.1	64658.9	60688.3	85536.2	94689.3	85513.3	83272.9	54296	103414	73720.9	69380.7	77006.2	48725.1	20687.7	55647.8	49382.5	69395.3	43196.4	95915.5	62407.1	65534.2	70238.7	54776.7	53336.4	76707.4	67812.1	79756.2	53926.6	63205.6	48632.2
MA0814.3	TFAP2C	30512.2	29510.3	22125	25572.2	25737.6	41446.4	39771.1	44126.1	33736.8	41029.8	17131.2	37532.1	18843	41524.1	35878	20527	19792.9	23933.9	28013.4	42762.8	39688.8	31927.1	48137.7	52178.6	48191.5	38076.3	51320.7	39260.8	44385.3	46933.9	23879.9	15101.5	31731.3	37692.7	40850.3	25498.1	54715.8	38030.2	47883.7	42692.6	31347.8	40087.4	50207.3	38668.3	46618.4	35161	43653.3	40241.3
MA0815.1	TFAP2C	71950.7	41911	44854.4	78602.6	45313.8	60007.4	70291.6	65510.2	50322.2	67740.9	37246.7	43188.3	53740.2	56002.6	86955.6	42090	46395.4	46669.6	62327.9	74138.4	69048	102242	107473	100737	99085.5	60882.6	118450	83668.3	83621.7	89327.4	54398.5	23167	63769.3	53935.9	77664.8	47270.6	111240	70970.8	75183.2	80982.8	62900.7	59124.2	88144	78884.7	92873.4	60589.4	72624.2	53808.1
MA0816.1	Ascl2	5617.99	9407.66	6021.89	12685	4923.77	12836.8	12143.1	13684.8	18926.7	13045.4	13465.5	6924.23	5425.26	20953.5	14666.4	8514.35	5432.06	8817.43	12147.1	13196.4	13484.4	10809.2	18019.1	14903.9	14583.6	17667	17093.6	13182	14740.7	14715	13042.3	7369.23	16383.2	19910	14768.2	17361.8	14794.6	19293.9	19019.2	19239.7	17110.7	17164.5	16585.9	10520.5	15980.1	14128.8	13586.8	19641.9
MA0817.2	BHLHE23	641.907	918.451	1076.75	948.222	861.163	548.829	460.014	514.115	1153.93	517.279	470.076	421.009	328.656	500.166	1564.51	849.551	400.416	867.057	692.827	520.67	528.663	352.552	421.274	496.996	358.645	447.65	334.509	364.73	147.202	276.73	1210.77	88.3758	574.159	308.281	271.919	600.353	384.022	504.532	320.062	459.408	869.069	259.265	340.122	472.709	352.245	528.884	224.79	321.28
MA0818.2	BHLHE22	882.406	1028.37	1246.29	1481.43	989.077	735.484	627.89	692.725	1273.32	702.411	669.894	524.393	456.467	667.044	1881.87	1164.79	541.443	1081.09	873.999	676.392	789.547	520.014	624.358	662.661	542.669	608.456	540.976	543.94	243.905	405.692	2431.76	131.966	1598.21	501.675	416.335	1493.62	578.463	1000.21	471.257	819.547	2368.27	396.263	474.209	828.143	565.557	803.121	323.065	494.437
MA0819.3	CLOCK	3012.29	2995.72	6254.77	1333.46	1569.19	2282.28	2809.87	2502.76	2871.99	2294.18	2153.44	2406.48	2430.84	3247.09	3141.39	1756.6	2188.44	2302.78	3218.21	2281.92	3670.76	2393.83	4922.69	4882.14	3762.42	3596.41	4851.18	4957.3	3090.18	3624.36	3552.53	1250.4	5331.02	3588.32	3999.42	7315.6	8633.2	7262.6	3750.42	6053.11	6857.4	3371.92	3986.62	3043.74	5836.6	3707.79	2874.83	3452.71
MA0820.2	FIGLA	0	0	0	0	0	0	0	0	0	0	0	0	0	0	0	0	0	0	0	0	0	0	0	0	0	0	0	0	0	0	0	0	0	0	0	0	0	0	0	0	0	0	0	0	0	0	0	0
MA0821.2	HES5	3754.55	2265.33	3314.07	2691.44	2687.98	4098.45	5197.17	4681.55	6203.05	3687.66	3388.29	3957.24	4416.17	6651.69	4541.35	4168.45	3890.84	4072.83	5281.71	4480.4	9371.13	4188.32	9365.37	14049.6	7743.78	5839.01	10310.5	7231.5	5053.23	7678.58	5268.46	1980.1	8370.13	4643.37	6542.97	8654.29	24105.9	12482.7	6328.59	10910.4	9764.87	5005.58	6673.26	5374.81	8825.77	7866.11	5515.83	4760.78
MA0822.1	HES7	2424.02	1975.96	5331.84	3721.97	1979.96	4239.5	5017.36	6410.92	7442.94	3976.7	2108.87	2111.27	2184.96	5581.05	5940.07	3103.79	2155.7	3435.42	5092.79	6650.12	7364.51	4357.54	8878.64	11031.7	7661.85	6167.14	9545.5	6262.25	6344.75	7354.84	4652.86	2270.3	6117.54	5250.36	6474.02	5834.08	15433.8	9068.3	6835.19	8364	6337.22	5667	7628.22	5668.9	7456.09	6374.6	6181.17	5102.92
MA0823.1	HEY1	3548.66	2461.34	4921.81	2125.84	2035.8	3157.75	3717.56	3425.95	4218.74	2723.43	3176.97	3908.66	4023	4958.53	3531.75	2525.85	3743.51	2968.3	4223.44	3163.55	6391.08	3202.94	7248.93	9141.53	5684.6	4506.92	7421.61	5811.7	3761.72	5098.01	4339.94	1533.44	6694.85	3915.75	4635.63	8308.12	14835.9	9884.84	4667.41	7999.24	8252.98	3906.65	4921.96	3987.36	6371.29	5585.47	3749.14	3711.41
MA0825.2	MNT	0	0	0	0	0	0	0	0	0	0	0	0	0	0	0	0	0	0	0	0	0	0	0	0	0	0	0	0	0	0	0	0	0	0	0	0	0	0	0	0	0	0	0	0	0	0	0	0
MA0826.1	OLIG1	764.752	1804.45	1818.71	984.119	983.672	647.459	545.187	573.504	1192.14	588.065	610.955	960.349	422.384	574.699	1682.67	987.343	515	1026.41	915.847	559.401	647.038	445.978	508.55	556.875	437.897	528.053	398.529	442.977	202	341.211	1392.79	114.052	696.855	419.339	349.982	731.076	488.534	581.982	404.496	611.775	1000.17	319.662	392.449	595.397	444.867	632.423	265.456	423.505
MA0827.1	OLIG3	1031.2	1964.7	1954.44	2137.22	987.275	918.427	717.178	818.151	1360.48	851.242	809.336	736.143	603.754	798.297	1556.47	1413.61	712.69	1310.74	1018.14	741.875	1044.68	636.357	735.131	734.516	596.399	714.936	630.605	658.786	304.075	466.142	3012.6	152.269	1840.45	568.693	516.516	1636.45	648.948	1059.96	541.946	932.668	2454.96	483.176	608.295	986.916	668.003	878.676	358.083	577.886
MA0828.3	SREBF2	1112.52	837.664	1919.67	734.587	951.243	1027.66	1905.07	1004.3	1410.62	962.865	1070.97	1135.98	1217.25	1279.71	1143.22	808.908	1173.55	598.348	883.643	1039.74	775.756	586.999	626.036	696.593	690.426	751.878	702.628	947.793	1092.74	851.683	832.401	391.123	1308.77	809.957	706.469	1416.16	680.545	1208.22	920.915	1068.87	1423.07	975.19	1026.91	692.826	822.373	696.784	860.754	857.442
MA0829.3	SREBF1	1235.37	1484.62	2053.02	1058.54	1091.77	1498.54	2582.74	1470.55	2043.41	1458.36	1354.16	1342.74	1348.71	1699.25	2581.54	1233.19	1381.31	1096.71	1739.56	1435.84	1195.24	1006.54	1064.09	1075.83	975.193	1186.49	971.515	1345.34	1707.33	1728.89	1308.94	714.769	1417.31	1897.56	1498.81	1634.03	826.376	1402.95	1996.95	1470.57	1590.12	1951.85	2022.75	1033.83	1152.16	1133.32	1624.36	1727.4
MA0830.3	TCF4	13864.2	11099.5	13058.6	16682.7	7318.09	17133.5	16047	18147.8	28479.9	19266.8	12837.2	27515.1	12510.8	19150.2	18422.1	15912.5	12550.1	13118.3	17514.6	18455.4	18507.8	10826.9	18831.4	16893.9	15425.8	16654.3	17711.4	15487.8	22565	17871.9	12457.4	8088.18	13356.7	22240.3	16280	14745	16948	19318.3	19205.7	18918.8	14503.5	21084.4	19092.6	11106.9	15935.2	15525.1	18655.3	20599.5
MA0831.3	TFE3	4225.17	2561.99	5623.29	1532.21	1351.2	2380.91	2830.86	2834.72	3955.48	2010.58	3464.48	4223.79	4603.62	2900.68	2300.68	1692.16	4222	1709.12	2550.18	2858.09	2245.67	1230.41	1928.46	2582.78	1923.52	1490.72	2147.9	1903.16	1459.13	2027.11	1959.31	523.089	3202.7	1215.89	1664.04	3853.88	3045.44	3334.78	1612.09	2668.72	3419.18	1536.44	1695.71	1447	2780.07	1706.98	1129.6	1694.02
MA0832.2	Tcf21	3540.01	2806.34	1623.46	2394.63	4168.9	2861.86	2412.81	2908.29	3760.87	3153.13	5337.59	2042.77	1453.39	3061.93	4507.94	2281.99	1460.64	1945.02	3804.61	2717.55	2898.45	1508.92	2608.21	2524.9	2415.15	3209.61	2415.18	2414.29	2298.29	2416.69	2441.98	1262.34	3635.29	3400.67	2730.9	16197.4	1847.19	2732.88	3143.68	3398.24	3543.94	3426.42	2958.08	1607.57	2603.25	2711.58	2256.94	3511.13
MA0833.3	ATF4	619.415	791.311	524.802	1511.2	590.924	457.092	404.878	409.962	508.016	411.101	730.271	675.109	654.878	493.135	561.714	615.602	649.732	617.095	542.31	442.01	620.605	437.165	525.333	441.109	389.54	460.688	488.159	446.763	347.054	339.867	572.659	243.033	407.417	591.671	325.262	861.798	405.896	524.448	386.824	519.431	592.066	453.714	444.775	451.058	454.691	500.901	279.011	567.455
MA0834.2	ATF7	14109.9	427.109	818.635	4265.68	684.607	390.808	947.596	379.824	481.152	333.963	813.649	559.269	530.719	800.172	296.942	478.802	494.854	428.061	357.349	343.387	362.019	527.065	857.653	540.907	628.637	319.44	1117.16	665.096	984.215	626.001	869.215	249.005	913.934	396.362	2034.84	3188.17	981.929	1057.75	679.396	863.41	1133.38	788.107	858.481	709.064	627.305	405.758	1074.25	502.782
MA0835.3	BATF3	489.649	788	620.048	832.649	637.765	1041.98	791.241	996.319	914.548	1109.88	323.447	367.449	995.707	787.515	804.217	547.202	292.127	729.578	771.53	857.668	473.498	611.678	483.374	532.923	494.313	643.225	468.952	641.117	581.288	603.164	558.343	282.444	498.653	674.007	685.652	573.725	486.103	551.002	624.416	706.427	575.15	679.098	760.369	535.857	613.271	450.531	528.652	684.284
MA0836.3	CEBPD	413.52	595.304	294.785	331.834	868.37	394.52	306.539	331.959	464.437	352.567	579.329	495.744	447.946	517.979	413.244	741.499	488.558	473.366	510.105	338.196	1299.82	507.675	570.65	381.23	429.837	630.187	496.161	742.08	280.437	350.614	496.986	132.564	393.259	471.039	402.024	479.314	388.883	535.512	388.787	459.408	475.768	346.178	363.015	535.857	408.38	565.263	316.288	494.437
MA0837.3	CEBPE	216.276	237.062	285.26	349.345	369.327	191.427	155.121	160.882	155.21	175.603	700.083	246.627	182.587	428.915	168.886	360.836	222.873	242.151	238.003	152.528	328.691	165.7	245.044	201.593	124.921	112.999	240.078	157.755	109.596	151.798	231.109	51.9506	138.427	157.013	107.987	142.826	262.496	208.009	119.778	203.155	150.131	114.902	155.344	194.857	129.11	263.043	119.737	143.95
MA0838.1	CEBPG	257.801	305.93	316.215	448.282	437.788	250.817	196.679	226.92	225.055	224.154	498.827	240.399	233.711	350.632	379.219	365.793	243.02	254.649	281.746	214.018	366.616	273.228	3333.27	221.553	167.905	182.537	3295.47	239.788	146.128	188.069	282.239	57.922	187.191	178.076	154.825	312.281	255.204	316.439	184.576	247.018	209.338	167.933	196.224	277.852	155.774	299.421	140.07	187.761
MA0839.2	CREB3L1	1342.64	1820.35	3588.37	1173.24	1297.15	1855.94	2930.84	1729.38	2001.02	1655.75	1253.54	1605.56	1106.48	2179.26	1996.31	1245.08	1143.33	1563.83	2117.92	1656.24	3821.32	1917.88	4739.75	3279.38	3166.02	2731.53	4609.5	3662.44	2655.02	2506.69	2341.77	983.479	3213.71	2556.25	2449.87	4171	4362.78	4206.65	2485.88	3818.4	3569.31	2094.74	2680.1	2323.85	3624.9	2957.83	2557.41	2317.8
MA0840.2	Creb5	13542.3	401.284	741.962	4959.12	801.711	305.435	762.438	306.696	447.125	297.209	777.71	546.814	530.719	799.703	285.806	509.532	464.634	470.242	354.422	282.695	242.496	474.183	560.58	353.286	467.448	249.902	803.461	514.913	868.172	604.507	654.468	253.185	665.395	442.317	2025.73	2474.04	663.531	770.075	720.631	690.266	737.968	804.311	825.777	577.355	520.649	246.253	1052.79	540.334
MA0841.2	NFE2	1783.85	1434.95	856.733	1481.43	1273.73	1350.6	1329.02	1238.75	1789.1	1279.59	815.086	807.142	669.485	1235.65	1208.18	1269.87	664.842	1238.88	1542.54	1177.9	924.011	944.84	686.458	888.206	823.407	1019.16	683.422	1105.55	756.427	885.267	1069.65	381.568	832.136	947.822	1005.71	1062.72	782.627	863.015	989.64	1036.55	898.672	1123.97	1008.92	1046.46	912.188	1007.4	782.812	1053.55
MA0842.3	NRL	555.397	1187.96	757.201	1157.48	853.957	678.215	540.661	601.869	889.475	600.77	362.26	739.88	373.694	613.606	741.735	691.933	394.12	574.914	627.901	547.023	572.336	562.321	622.68	584.819	565.505	682.34	592.192	670.144	1031.49	624.657	742.412	235.271	619.777	804.212	537.333	1060.3	517.7	655.006	742.23	731.821	704.136	626.066	680.244	570.138	583.801	668.801	509.449	730.181
MA0843.2	TEF	188.593	213.886	427.652	520.953	140.525	124.613	105.746	124.097	91.3354	109.355	127.941	98.4015	98.5969	118.596	101.455	123.913	125.917	128.106	124.168	114.995	126.419	125.156	125.879	75.8468	67.1621	58.6726	113.637	82.0327	75.2129	104.781	210.657	27.4681	88.0901	84.2508	100.181	145.247	106.943	97.3658	109.96	124.663	90.9245	89.8589	132.451	95.6244	78.5885	95.1432	75.6831	164.812
MA0844.2	XBP1	2346.16	848.921	1559.17	747.721	704.424	953.424	2084.88	1014.93	832.167	846.251	682.832	1251.82	604.971	1182.21	1261.38	999.239	650.991	1526.33	886.743	922.352	1215.93	1110.54	2651.84	1836.29	1842.93	2064.41	2599.24	2026.84	3569.39	1278.87	1259.85	403.065	1590.34	1112.49	1436.36	1975.36	2812.11	2228.35	1242.94	1909.2	1761.4	994.34	1358.85	1364	1992.78	1634.22	1545.29	990.96
MA0845.1	FOXB1	330.47	401.946	567.663	1468.3	817.925	170.747	157.178	195.895	208.937	150.192	191.193	133.278	208.149	183.754	173.216	411.393	162.433	301.517	304.995	185.668	191.928	144.546	181.265	217.56	127.608	186.883	192.062	133.776	74.1385	102.095	249.516	53.1449	116.405	176.161	134.008	176.717	140.97	165.964	111.924	140.824	173.391	129.632	222.388	207.487	119.286	221.068	102.793	141.864
MA0846.2	FOXC2	351.232	987.98	535.756	1414.01	965.656	415.201	411.462	483.977	380.266	372.986	329.197	261.574	421.167	240.942	337.771	590.82	285.832	448.37	431.058	532.649	275.824	398.384	297.074	518.952	355.959	441.131	352.114	338.227	303.001	314.344	292.465	128.981	468.765	430.828	357.788	232.395	269.788	190.306	404.496	251.636	219.91	372.693	649.175	487.143	348.035	498.103	275.622	444.368
MA0847.4	FOXD2	370.265	1205.84	553.376	461.415	695.417	396.642	382.248	357.664	486.525	375.254	393.886	323.853	411.429	303.756	501.707	581.898	377.751	543.668	569.692	378.923	501.081	539.405	355.817	624.738	491.626	510.669	404.932	352.11	409.373	408.378	343.596	152.866	432.585	528.482	452.765	280.81	274.649	267.756	453.585	337.053	291.804	505.272	636.094	606.222	392.943	584.851	358.083	544.507
MA0848.1	FOXO4	3581.53	821.109	781.013	467.544	556.694	509.589	420.925	395.78	549.803	473.719	317.697	257.837	371.26	337.975	398.397	582.889	289.609	490.551	656.834	356.563	360.87	408.961	318.892	413.165	326.408	465.034	318.503	354.634	279.362	318.374	496.986	132.564	1278.88	382.958	333.068	801.278	549.297	440.359	349.516	554.06	759.114	346.178	469.303	409.561	467.321	391.766	316.288	337.97
MA0849.1	FOXO6	3581.53	821.109	781.013	467.544	556.694	509.589	420.925	395.78	549.803	473.719	317.697	257.837	371.26	337.975	398.397	582.889	289.609	490.551	656.834	356.563	360.87	408.961	318.892	413.165	326.408	465.034	318.503	354.634	279.362	318.374	496.986	132.564	1278.88	382.958	333.068	801.278	549.297	440.359	349.516	554.06	759.114	346.178	469.303	409.561	467.321	391.766	316.288	337.97
MA0850.1	FOXP3	3581.53	821.109	781.013	467.544	556.694	509.589	420.925	395.78	549.803	473.719	317.697	257.837	371.26	337.975	398.397	582.889	289.609	490.551	656.834	356.563	360.87	408.961	318.892	413.165	326.408	465.034	318.503	354.634	279.362	318.374	496.986	132.564	1278.88	382.958	333.068	801.278	549.297	440.359	349.516	554.06	759.114	346.178	469.303	409.561	467.321	391.766	316.288	337.97
MA0851.2	Foxj3	3555.58	966.128	693.387	729.334	1093.57	309.677	352.623	323.538	428.023	327.61	326.322	259.082	349.349	301.881	324.161	624.524	329.902	418.687	492.539	313.44	311.452	331.399	312.179	353.286	290.14	443.304	310.501	310.462	273.99	338.524	454.037	104.498	604.046	356.151	339.574	249.34	323.259	300.949	320.062	272.413	287.575	331.447	508.548	337.392	411.187	402.959	279.011	358.832
MA0852.3	FOXK1	3581.53	821.109	781.013	467.544	556.694	509.589	420.925	395.78	549.803	473.719	317.697	257.837	371.26	337.975	398.397	582.889	289.609	490.551	656.834	356.563	360.87	408.961	318.892	413.165	326.408	465.034	318.503	354.634	279.362	318.374	496.986	132.564	1278.88	382.958	333.068	801.278	549.297	440.359	349.516	554.06	759.114	346.178	469.303	409.561	467.321	391.766	316.288	337.97
MA0853.2	Alx4	619.415	404.595	2238.27	755.601	383.74	312.329	345.216	319.549	716.356	245.935	685.707	629.023	769.299	283.599	358.186	504.576	758.02	382.755	404.02	291.08	240.197	297.906	646.177	261.472	299.543	258.594	952.309	567.919	589.884	347.928	3626.16	200.637	1406.3	764.002	372.1	1193.44	364.578	500.106	518.383	464.025	1268.71	889.75	603.39	456.471	373.296	249.051	1245.95	609.18
MA0854.2	Alx1	352.962	205.277	2094.45	365.98	180.16	161.202	157.178	195.009	513.388	143.386	678.52	690.056	781.472	137.815	202.91	249.81	783.204	231.215	174.283	153.326	165.495	243.261	493.444	183.629	236.41	169.499	774.652	411.425	466.32	217.623	2981.92	140.923	1079.1	666.347	299.241	876.322	238.191	362.909	451.622	346.288	888.1	786.634	500.372	342.804	275.06	167.9	1036.97	479.833
MA0855.1	RXRB	13358.9	8247.51	11629	9628.43	8415.26	14737.8	12568.5	13914.8	14986.2	15086.4	9759.47	15148.9	10185.9	11431.2	13705.7	9827.83	10142.6	9426.71	13370.2	13329.4	8434.48	7809.03	8734.3	7283.29	7202.46	9318.07	8562.78	9034.95	9622.96	10545.3	12717.1	3769.7	11458	10242.2	10495.6	12227.4	6482.19	9988.85	9197.37	8855.73	11600.3	10454.6	9565.94	9723.01	10296.5	10138.3	12269.7	9970.1
MA0856.1	RXRG	12400.4	7402.57	10913.7	9096.97	7629.76	14069.1	12096.2	13191.5	13949.2	14177.1	9068.01	14381.6	9008.83	10561.6	12866.2	8933.67	8785.23	8564.34	11456.4	12541.6	7520.81	7273.15	7933.71	6437	6493.23	8685.71	7730.51	8200.75	8849.34	9000.44	12240.6	3639.53	10982.9	9550.98	10826	11752.9	5993.66	9590.53	8735.93	8315.52	10875	9309.97	8799.03	8900.28	10053.7	9340.83	11315.2	9216.97
MA0857.1	Rarb	17108.3	6326.52	5265.64	4816.41	5062.49	7818.29	7556.08	7573.88	7636.35	7780.97	5216.84	9533.74	5609.07	6288.4	13898.7	4253.7	5745.59	4999.25	7490.21	7435.52	5153.32	6374.14	5555.44	4460.99	4074.05	4602.54	5739.46	6048.96	6465.09	6140.45	10663.7	2456.01	8341.81	6931.55	6303.58	10097.1	4950.96	8767.35	5501.93	5702.2	9111.48	6813.07	5607.11	7002.23	4734.96	6405.38	6402.57	6557.03
MA0858.1	Rarb	3892.97	1903.12	5589.95	3223.78	2529.44	4403.89	3548.86	4217.51	4311.87	4074.25	2985.77	5238.95	3082.07	4101.64	5203.9	2754.85	3171.85	2994.86	4565.98	3944.55	3254.73	3264.63	5108.99	2920.1	2941.7	3509.49	4902.39	4509.27	6851.9	5656.84	11373.4	2505.57	10161.8	5730.97	6353.02	11791.6	3091.62	6534.57	5103.32	4931.13	12904.9	6332.84	5592.39	4539.45	3977.14	3565.07	8127.46	5065.37
MA0859.2	Rarg	21079.1	8723.63	8263.97	12460	7008.21	10928.3	10633.4	10651.5	11616.3	11117.9	6576.75	11222.8	8459.86	8805.17	22524.3	6056.89	8494.36	6516.21	10359.3	10550	7592.06	8039.95	8365.05	6207.46	5908.92	6451.81	8311.5	8910.01	8980.42	8956.11	17985.6	3370.22	13882.1	9315.46	8926.49	15217	6491.91	11194.9	7375.18	8024.64	14679	9118.47	7863.69	9778.95	7150.15	8392.19	11104	8787.21
MA0860.1	Rarg	11310.4	4719.39	5939.51	6942.24	4776.03	7750.95	5869.09	6848.36	6546.9	7620.34	4291.06	5577.75	4765.52	5407.6	10417.1	5845.74	4433.54	4725.85	8014.27	6752.74	6226.73	7794.93	7010.6	5560.77	6215.18	6860.34	7538.45	8634.89	12762.6	10386.8	16320.8	3958.4	14684.3	9353.76	9368.85	14950.7	8088.76	9156.81	9313.22	6731.83	17117.1	9871.22	9000.16	12958	7102.44	6147.93	16061.8	8622.4
MA0861.2	TP73	880.676	797.271	980.076	1197.75	769.282	1312.42	1187.48	1153.21	2030.87	1106.71	1270.79	1523.36	1984.11	1325.65	1443.88	812.873	1051.41	1088.9	1845.64	1151.94	1874.46	1508.92	1393.06	1844.27	1665.62	1514.62	1416.46	1980.14	1466.65	1569.03	1169.86	589.371	1470.79	1556.73	1548.25	2130.29	2972.52	2130.98	1500.17	1639.09	2082.8	1436.27	1479.86	2152.45	2006.81	2095.95	1640.18	1449.93
MA0862.1	GMEB2	280.294	168.857	107.627	162.852	250.422	93.8577	52.2556	64.2643	51.3388	43.1066	58.9392	34.8765	47.4726	78.7515	67.4305	70.3829	51.626	60.9284	79.7362	67.8787	44.8215	44.069	104.06	61.875	71.1918	47.8073	72.0234	69.4123	26.8618	38.9571	83.8537	9.5541	42.472	13.4035	23.4189	121.039	94.7902	50.8958	29.4536	62.3318	82.4664	88.3858	42.5153	48.7143	75.7818	81.1516	27.1104	22.9486
MA0863.1	MTF1	1885.93	2321.62	2312.56	1811.51	1243.1	3475.39	3208.99	3417.98	3002.13	3283.82	1965.12	1984.22	2223.91	3772.1	2623.6	7071.99	2347.09	2259.04	3217.18	3295.71	3468.49	3523.76	3950.91	4480.95	3266.76	3081.4	3780.43	2732.32	2593.77	3322.1	3182.35	1187.1	3504.73	2906.65	3022.34	3546.44	5505.12	4390.31	3308.62	4441.72	3518.57	3068.46	3201.73	3581.4	3283.88	3422.36	2775.42	3018.78
MA0864.3	E2F2	1370.33	764.824	703.864	1716.96	1325.98	838.886	1058.69	783.139	410.711	911.591	562.079	711.231	696.264	1070.18	617.391	1225.26	603.142	767.072	662.517	732.292	1213.63	701.579	565.615	694.597	347.899	312.92	598.594	482.1	350.277	376.138	697.417	168.989	605.619	384.873	217.275	571.304	1198.25	493.468	312.208	667.181	765.457	259.265	444.775	506.99	484.162	500.901	474.432	383.867
MA0865.3	E2F8	8408.81	9591.75	11297.1	9464.71	16158.5	14580.3	20341	17805.2	10584.2	13835.4	12636	12185.6	16441.3	14345.4	17222	18081.5	17934.4	19034.6	12230.3	20303.3	22064.8	13594.4	12243.8	20392.8	21807.5	12605.9	12658.5	13704.5	12726	15017.3	9819.06	3615.05	12504.1	7594.06	11873.4	8898.79	25068.4	13965.4	12690.6	15707.6	12397.4	8894.56	14947.4	16676.5	18326.6	15066.2	12441.4	8741.31
MA0866.1	SOX21	560.588	727.741	410.508	1003.38	708.028	758.816	578.104	760.978	908.578	769.112	514.64	332.572	328.656	630.481	514.08	598.75	394.12	674.899	566.248	660.021	526.365	458.318	407.847	357.278	351.929	499.803	414.535	420.26	883.215	421.812	462.218	240.645	396.405	629.966	625.804	832.748	367.008	484.616	579.254	427.088	477.882	608.389	560.875	499.773	373.296	425.346	421.34	759.389
MA0867.3	SOX4	2238.89	2874.55	2878.32	2198.51	3116.76	2711.8	2670.39	2579.88	2356.81	2303.25	2313	1911.98	2055.93	2819.59	2216.54	2734.03	2258.95	3166.71	3856.62	2551.84	2786.98	2776.35	2366.52	1812.34	1833.52	2142.64	2373.57	2395.35	2960.17	3082.99	2836.71	1077.83	2348.54	3341.31	2457.68	3040.5	1844.76	3764.07	2947.32	2800.31	3230.99	2909.37	2958.08	2852.49	2513.43	2496.11	2575.49	3636.3
MA0868.3	SOX8	821.849	987.98	1366.3	1948.98	927.823	702.077	622.13	651.064	650.093	645.692	678.52	634.005	539.24	707.826	669.974	963.552	584.255	1965.33	1052.93	619.693	804.488	509.438	570.65	391.21	386.853	428.092	531.373	418.998	738.161	462.112	1036.92	238.853	597.754	677.836	791.037	859.377	337.842	882.931	644.052	641.786	995.94	598.077	557.604	530.445	343.825	509.296	590.78	899.166
MA0869.3	Sox11	2586.66	3436.74	2911.65	1925.34	3666.25	2868.76	2503.33	2806.8	2663.65	2410.79	2412.2	1853.44	2197.13	2983.65	2396.57	2601.19	2413.83	3121.41	3034.97	2760.67	2677.79	3132.43	3101.65	2235.48	2283.51	2583.77	3239.45	3056.66	3495.25	3185.08	3133.26	1305.93	2914.84	4168.5	3456.89	3471.4	2693.01	4122.56	3640.46	3732.98	3753.28	3561.95	3759.33	3419.02	2826.38	2913.06	2983.27	4335.19
MA0870.1	Sox1	865.104	889.977	965.789	1949.85	880.981	1162.88	990.8	1064.13	1546.13	1138.47	549.141	767.283	463.771	1420.81	1065.28	915.969	540.184	854.559	1164.36	1096.44	781.502	712.155	532.047	449.093	519.834	697.552	568.184	755.963	1261.43	722.722	1149.41	364.849	849.44	1202.49	952.367	963.47	566.311	1033.41	873.789	840.324	998.055	1153.43	966.405	826.339	558.54	710.776	998.565	1462.45
MA0871.3	TFEC	2776.98	3219.54	6957.2	1974.37	2102.46	2094.03	2204.61	2288.25	2707.83	1727.44	2290	3313.27	3041.9	2908.65	2034.05	1599.97	2797.88	1801.29	3033.77	2171.72	3278.86	1639.37	2890.17	3526.88	2489.03	2173.06	3119.41	2291.87	1891.07	2346.83	2384.72	675.358	3723.38	1734.8	2144.13	5001.33	4916.94	4885.99	2165.82	3589.85	4131.78	2007.83	2276.2	1831.3	3481.75	2389.77	1511.4	1915.16
MA0872.1	TFAP2A	75604.9	53223.8	38976.3	85498.4	43319.4	59549.8	70258.7	65123.3	53418.7	67941	37134.6	43084.9	52603.3	60569.3	88343.8	41255.3	45793.5	43557.5	63335.2	72840.7	69020.4	92400.4	108662	100234	98326.6	61690.9	118587	85263.5	87702.6	89804.2	54635.8	23797.6	64074.5	55529	77339.5	49003.8	111140	71807.3	76133.6	82017.1	62985.3	63331.4	88919	78850.4	92327.5	60872.1	73303.1	54915.9
MA0873.2	HOXD12	397.948	612.521	425.747	181.239	129.715	112.947	127.142	160.882	112.229	95.2883	211.319	222.96	266.577	152.347	186.826	141.757	263.166	128.106	162.228	156.92	121.822	102.24	177.909	129.738	123.578	65.1917	177.658	133.776	112.819	85.9744	376.319	44.785	531.687	107.228	139.212	513.205	102.082	126.133	94.2514	237.784	437.706	148.783	125.911	97.4286	131.917	142.715	93.7567	108.484
MA0874.2	Arx	505.221	259.577	1666.8	550.721	237.811	229.607	254.283	248.193	624.424	202.374	507.452	498.236	557.498	203.91	261.061	310.279	546.48	357.759	269.002	214.018	156.3	216.82	594.147	209.577	221.635	193.402	873.884	444.239	511.448	275.387	2949.19	167.795	1234.83	670.177	330.466	1079.67	306.245	464.7	475.184	427.088	1103.78	832.3	554.334	377.085	294.707	167.9	1052.79	534.076
MA0875.2	BARX1	0	0	0	0	0	0	0	0	0	0	0	0	0	0	0	0	0	0	0	0	0	0	0	0	0	0	0	0	0	0	0	0	0	0	0	0	0	0	0	0	0	0	0	0	0	0	0	0
MA0876.2	BSX	0	0	0	0	0	0	0	0	0	0	0	0	0	0	0	0	0	0	0	0	0	0	0	0	0	0	0	0	0	0	0	0	0	0	0	0	0	0	0	0	0	0	0	0	0	0	0	0
MA0877.4	BARHL1	0	0	0	0	0	0	0	0	0	0	0	0	0	0	0	0	0	0	0	0	0	0	0	0	0	0	0	0	0	0	0	0	0	0	0	0	0	0	0	0	0	0	0	0	0	0	0	0
MA0878.3	CDX1	1282.08	1117.11	1165.33	1615.39	646.773	596.553	1028.65	888.177	512.194	448.309	599.455	691.302	845.986	502.978	632.857	884.247	705.135	568.665	456.202	944.712	482.693	419.537	629.393	467.057	454.015	451.996	637.007	523.747	378.214	484.949	1227.13	184.514	586.743	727.621	599.783	551.938	483.673	473.552	536.055	496.346	680.876	567.142	524.9	546.683	439.254	615.633	493.635	690.543
MA0879.3	DLX1	0	0	0	0	0	0	0	0	0	0	0	0	0	0	0	0	0	0	0	0	0	0	0	0	0	0	0	0	0	0	0	0	0	0	0	0	0	0	0	0	0	0	0	0	0	0	0	0
MA0880.2	Dlx3	0	0	0	0	0	0	0	0	0	0	0	0	0	0	0	0	0	0	0	0	0	0	0	0	0	0	0	0	0	0	0	0	0	0	0	0	0	0	0	0	0	0	0	0	0	0	0	0
MA0881.2	Dlx4	0	0	0	0	0	0	0	0	0	0	0	0	0	0	0	0	0	0	0	0	0	0	0	0	0	0	0	0	0	0	0	0	0	0	0	0	0	0	0	0	0	0	0	0	0	0	0	0
MA0882.2	DLX6	0	0	0	0	0	0	0	0	0	0	0	0	0	0	0	0	0	0	0	0	0	0	0	0	0	0	0	0	0	0	0	0	0	0	0	0	0	0	0	0	0	0	0	0	0	0	0	0
MA0883.2	Dmbx1	1162.7	1252.19	2390.66	1417.52	886.386	1060.01	909.742	897.041	835.749	1114.42	1059.47	871.912	939.713	1128.3	1218.7	1755.61	928.008	1007.66	1081.18	831.315	738.979	770.326	938.215	790.403	827.437	1023.51	934.704	725.674	930.491	914.821	2380.63	449.045	1190.79	1181.43	943.26	1699.39	794.779	1369.76	971.968	833.399	2010.91	1079.78	904.267	806.492	1595.63	2213.48	987.269	1452.02
MA0884.2	DUXA	4597.16	261.563	444.796	193.497	263.033	162.793	150.184	179.497	207.146	168.796	260.195	401.08	234.928	249.38	165.792	252.784	197.69	173.411	318.084	152.927	113.778	77.5615	70.492	115.766	77.908	130.383	104.034	93.3911	102.075	52.3906	274.058	44.1879	62.9215	206.798	100.181	91.9896	68.0545	97.3658	94.2514	55.406	118.413	109.009	101.383	84.799	77.1852	170.698	162.662	118.915
MA0885.3	Dlx2	337.391	358.904	1442.97	1716.08	363.923	365.356	308.185	684.304	2463.07	332.148	511.765	409.799	396.822	311.256	340.245	360.836	410.489	409.314	353.733	837.703	371.214	236.21	485.052	596.794	323.721	343.343	478.555	354.634	205.224	260.61	1145.32	98.5271	739.327	314.026	644.019	716.551	301.384	365.122	267.046	417.854	917.703	343.232	266.538	238.159	286.287	391.766	248.512	267.038
MA0886.2	EMX2	0	0	0	0	0	0	0	0	0	0	0	0	0	0	0	0	0	0	0	0	0	0	0	0	0	0	0	0	0	0	0	0	0	0	0	0	0	0	0	0	0	0	0	0	0	0	0	0
MA0887.2	EVX1	0	0	0	0	0	0	0	0	0	0	0	0	0	0	0	0	0	0	0	0	0	0	0	0	0	0	0	0	0	0	0	0	0	0	0	0	0	0	0	0	0	0	0	0	0	0	0	0
MA0888.2	EVX2	0	0	0	0	0	0	0	0	0	0	0	0	0	0	0	0	0	0	0	0	0	0	0	0	0	0	0	0	0	0	0	0	0	0	0	0	0	0	0	0	0	0	0	0	0	0	0	0
MA0889.2	GBX1	1394.55	1395.89	1348.68	1820.27	1127.8	973.575	1465.63	997.648	757.546	1121.23	1348.41	1723.9	1342.62	1549.25	866.698	1224.27	1393.9	1026.41	999.889	2858.09	819.428	574.66	716.669	548.891	554.759	519.361	733.038	591.897	677.991	603.164	2734.45	271.099	1217.53	796.553	1393.42	1101.45	542.005	606.323	598.889	600.232	1262.37	936.89	703.137	663.958	489.775	744.356	1049.4	903.339
MA0890.2	GBX2	0	0	0	0	0	0	0	0	0	0	0	0	0	0	0	0	0	0	0	0	0	0	0	0	0	0	0	0	0	0	0	0	0	0	0	0	0	0	0	0	0	0	0	0	0	0	0	0
MA0891.2	GSC2	0	0	0	0	0	0	0	0	0	0	0	0	0	0	0	0	0	0	0	0	0	0	0	0	0	0	0	0	0	0	0	0	0	0	0	0	0	0	0	0	0	0	0	0	0	0	0	0
MA0892.2	GSX1	0	0	0	0	0	0	0	0	0	0	0	0	0	0	0	0	0	0	0	0	0	0	0	0	0	0	0	0	0	0	0	0	0	0	0	0	0	0	0	0	0	0	0	0	0	0	0	0
MA0893.3	GSX2	654.019	317.187	751.963	1359.73	270.24	269.377	212.726	461.817	259.679	347.122	260.195	191.821	206.932	178.129	226.418	191.322	206.504	253.087	324.628	564.192	205.719	192.141	369.244	267.46	216.262	230.344	419.336	379.875	265.394	321.06	1315.07	108.081	688.99	268.071	209.469	728.655	221.177	325.29	286.682	318.585	742.197	319.662	268.173	290.482	289.094	263.043	395.36	212.796
MA0894.2	HESX1	0	0	0	0	0	0	0	0	0	0	0	0	0	0	0	0	0	0	0	0	0	0	0	0	0	0	0	0	0	0	0	0	0	0	0	0	0	0	0	0	0	0	0	0	0	0	0	0
MA0895.2	HMBOX1	214.546	284.74	379.553	561.228	214.39	172.338	361.263	208.748	182.074	156.999	237.194	214.241	241.015	145.315	212.189	195.288	271.981	289.019	225.087	233.583	132.166	84.6125	70.492	101.794	84.6242	119.518	78.4255	80.7707	48.3512	47.0172	196.34	24.4825	78.6518	57.4438	81.966	84.7273	97.2207	73.0244	47.1257	80.8004	65.5502	79.5472	53.9617	113.667	96.8323	187.488	88.1087	50.0696
MA0896.2	Hmx1	448.124	351.62	2089.68	1128.59	230.605	304.375	284.731	292.514	359.372	265.9	448.513	376.168	402.908	275.162	310.551	368.767	420.563	357.759	450.346	287.486	293.063	153.36	240.009	221.553	235.067	232.517	228.874	290.269	134.309	155.828	503.122	78.2245	460.9	269.986	978.388	324.385	233.33	219.073	168.867	244.71	410.217	219.491	192.954	221.921	206.295	282.631	169.44	246.175
MA0897.2	Hmx2	335.661	296.659	680.053	344.091	286.454	241.803	264.158	256.614	262.664	214.172	296.134	282.749	277.532	236.255	217.757	298.384	280.795	281.208	343.572	242.766	243.645	148.072	208.119	187.621	192.083	206.44	190.462	164.065	162.245	166.575	513.348	63.2962	240.675	268.071	604.987	300.177	184.719	177.029	166.904	203.155	378.5	194.449	179.872	171.402	168.404	221.068	198.809	225.313
MA0898.2	Hmx3	352.962	286.064	1793.95	1040.15	189.168	263.014	228.773	258.83	296.691	242.304	409.699	347.519	353.001	225.004	244.358	306.314	381.529	295.268	365.099	249.554	257.436	130.444	211.476	209.577	218.948	212.96	208.068	223.381	114.968	131.648	409.042	56.7277	206.068	235.519	939.357	256.603	179.858	194.732	145.304	214.698	353.125	170.879	165.155	178.619	172.614	218.27	138.941	219.054
MA0899.2	HOXA10	960.266	660.198	1471.07	787.12	457.606	323.995	325.055	565.526	355.193	237.767	493.077	474.569	567.236	309.85	483.767	680.037	540.184	409.314	429.164	674.395	350.527	331.399	392.741	379.234	345.213	347.689	419.336	365.992	271.841	318.374	844.672	125.398	350.787	564.864	728.587	312.281	352.425	236.776	382.897	348.596	317.178	436.037	379.367	422.191	339.615	450.531	380.675	559.11
MA0900.3	HOXA2	0	0	0	0	0	0	0	0	0	0	0	0	0	0	0	0	0	0	0	0	0	0	0	0	0	0	0	0	0	0	0	0	0	0	0	0	0	0	0	0	0	0	0	0	0	0	0	0
MA0901.3	HOXB13	1420.5	1861.4	3736	2312.33	1797.99	745.559	779.72	783.139	780.828	703.772	1116.97	1708.95	1239.16	834.391	987.331	2971.94	1081.63	1581.01	1363.09	730.295	861.951	1062.94	1282.28	922.137	916.09	1147.37	1205.19	1017.21	2180.1	1593.21	5346.18	535.032	1930.12	1918.62	1160.54	2418.36	707.281	1095.37	1382.35	865.719	5089.66	3153.9	1839.6	1250.33	878.508	1133.32	2417.34	2568.15
MA0902.3	HOXB2	0	0	0	0	0	0	0	0	0	0	0	0	0	0	0	0	0	0	0	0	0	0	0	0	0	0	0	0	0	0	0	0	0	0	0	0	0	0	0	0	0	0	0	0	0	0	0	0
MA0903.2	HOXB3	0	0	0	0	0	0	0	0	0	0	0	0	0	0	0	0	0	0	0	0	0	0	0	0	0	0	0	0	0	0	0	0	0	0	0	0	0	0	0	0	0	0	0	0	0	0	0	0
MA0904.3	HOXB5	0	0	0	0	0	0	0	0	0	0	0	0	0	0	0	0	0	0	0	0	0	0	0	0	0	0	0	0	0	0	0	0	0	0	0	0	0	0	0	0	0	0	0	0	0	0	0	0
MA0905.2	HOXC10	673.051	716.484	440.034	218.012	189.168	136.279	420.925	163.542	131.929	127.505	253.007	247.872	301.877	162.659	228.274	203.218	373.974	168.725	225.087	160.513	139.061	105.766	198.049	133.73	115.519	89.0954	179.258	164.065	192.33	102.095	409.042	41.7994	218.652	118.717	173.039	343.751	99.6512	117.281	153.159	117.738	323.522	150.256	135.722	153.36	181.034	170.698	126.515	131.433
MA0906.2	HOXC12	3330.65	773.432	472.417	192.621	219.795	145.824	139.074	141.381	152.823	117.522	254.445	298.941	374.912	165.003	218.376	206.192	337.457	181.223	196.844	140.549	149.405	119.868	191.335	135.726	135.667	104.307	169.655	143.873	138.607	100.751	388.59	43.5908	182.472	130.206	176.943	295.335	104.512	106.217	107.996	99.2691	296.033	142.89	140.627	140.73	148.757	176.295	124.256	123.088
MA0907.2	HOXC13	979.298	418.501	737.676	308.194	362.121	270.968	279.382	322.208	256.097	239.128	274.57	257.837	259.273	254.067	310.551	575.95	305.978	428.061	439.497	296.271	276.974	557.032	328.963	267.46	310.289	289.017	326.506	430.356	338.458	353.301	865.124	96.7356	1565.17	352.322	421.54	1345.95	233.33	628.452	316.135	655.638	1302.55	540.626	323.77	571.942	276.463	291.026	299.344	352.573
MA0908.2	HOXD11	365.074	749.593	382.887	156.724	147.731	110.296	382.659	162.212	107.453	102.095	258.757	257.837	337.177	112.502	189.919	177.444	357.604	117.17	149.312	156.92	110.33	75.7987	162.803	125.746	99.3998	67.3648	137.645	126.204	110.671	65.8241	304.736	42.9936	152.585	103.399	113.191	263.865	85.0681	70.8115	102.106	106.195	207.223	106.063	134.087	102.841	147.353	151.11	98.2751	100.139
MA0909.4	Hoxd13	880.676	993.94	2499.24	1397.38	767.48	466.637	464.54	514.115	475.183	559.932	685.707	662.653	656.095	468.759	656.983	1718.93	683.729	704.582	739.326	496.313	499.932	779.14	622.68	548.891	569.534	660.61	604.996	620.924	1063.73	681.078	1486.87	311.107	537.979	1242.7	528.226	672.977	522.561	539.938	700.995	537.9	623.784	1745.62	984.392	844.381	576.784	657.607	953.381	1591.8
MA0910.3	HOXD8	621.145	610.535	925.309	1386	581.916	532.921	497.046	502.591	495.479	581.712	595.142	397.343	466.205	451.415	533.257	517.463	487.299	488.989	570.726	475.151	449.364	430.114	436.379	375.242	330.437	467.207	414.535	412.688	350.277	326.434	1102.37	117.038	509.664	304.452	772.823	571.304	362.147	438.146	341.661	427.088	795.061	325.554	405.53	541.27	418.203	458.926	259.808	346.315
MA0911.2	Hoxa11	297.596	223.156	444.796	168.981	151.334	103.403	130.022	161.326	75.2174	103.002	196.943	196.803	243.449	105.471	188.063	171.496	285.832	120.294	205.454	156.92	119.524	79.3242	162.803	123.75	102.086	67.3648	153.65	148.921	176.213	83.2877	366.093	43.5908	545.844	107.228	145.717	527.73	102.082	137.197	104.069	240.093	465.195	147.31	124.275	126.296	154.37	131.522	107.312	112.656
MA0912.2	HOXD3	570.969	316.524	825.302	967.484	335.097	279.452	280.617	481.761	378.475	237.767	293.259	286.486	295.791	239.067	295.086	280.54	273.24	877.993	303.273	581.361	219.51	227.396	527.012	269.456	245.813	282.498	587.391	455.597	324.49	411.065	1619.81	149.881	838.429	350.407	284.93	953.787	301.384	418.23	333.807	373.991	981.139	422.779	328.676	350.021	325.581	274.236	484.598	262.865
MA0913.3	HOXD9	738.799	637.684	1257.24	737.214	432.383	409.368	848.023	699.373	394.593	304.015	442.763	511.937	562.367	344.538	513.461	660.211	540.184	412.438	402.126	774.217	378.109	320.822	427.987	391.21	345.213	360.728	448.146	410.163	294.405	353.301	879.441	145.103	386.967	616.563	749.404	358.275	388.883	283.246	426.095	387.842	380.614	459.606	425.153	414.974	367.682	442.136	412.304	565.369
MA0914.2	ISL2	0	0	0	0	0	0	0	0	0	0	0	0	0	0	0	0	0	0	0	0	0	0	0	0	0	0	0	0	0	0	0	0	0	0	0	0	0	0	0	0	0	0	0	0	0	0	0	0
MA1099.3	HES1	2280.41	3140.08	3812.2	1658.29	2491.61	2438.18	2837.03	2572.35	2891.09	2070.48	2584.7	2984.43	3635.91	3915.54	2334.7	3552.85	3103.85	3613.52	2641.63	2501.93	6301.44	2889.16	5355.72	10784.2	5307.15	2857.57	6170	3882.04	4190.43	4926.06	3255.98	1031.85	5928.78	2119.67	3451.68	5366.87	18870.5	7780.41	3917.33	7212.02	6952.55	2865.17	4410.14	3541.71	5104.05	5087.36	3680.23	2409.6
MA1100.3	ASCL1	6292.77	11076.4	8137.29	16951.5	5703.86	16082.5	14808.9	18143.4	23401.6	16747.6	14593.9	7817.32	5902.42	24287.3	18669	9352.99	6072.98	9953.19	14756	17935.2	17487.3	12988	21053.6	19394.8	18100.2	20641.9	20371.4	15378	16262.1	17722.8	15815.6	8205.81	18498.9	22330.3	16489.5	20186.9	18953.2	24064.8	21457.9	23039.7	20293.1	18527.1	19306.8	12902.1	19452.1	17864.5	15370.5	22182.9
MA1101.3	BACH2	851.263	1881.93	1154.85	940.342	1180.05	1722.85	1449.58	1587.55	2193.24	1514.63	838.087	929.209	1486.26	1539.87	1547.19	1059.71	741.651	1262.31	1781.75	1501.72	1129.73	1327.36	1191.65	1099.78	1066.53	1358.16	1121.96	1325.14	1071.25	1209.01	1135.09	524.88	1148.32	1259.93	1204.77	1660.66	1110.75	1431.72	1348.97	1595.23	1226.42	1266.86	1355.58	1259.36	1305.13	1365.59	1070.86	1481.22
MA1102.3	CTCFL	27017.2	16478.5	27369.3	33139.6	33443.1	50902.1	50846	58985.8	43252.4	51234.7	24239.8	28303.5	26910.9	48444.4	42122.4	37274.2	26939.9	29692.4	46695.6	57443	50002.4	30065.6	55628.3	51154.7	41319.4	33719.3	58122.9	37771.6	41870	44526.7	31661.9	12814.5	33099.8	32492.1	32298.5	29618.2	57822	41672.6	38650.9	44846.5	34139	33879.8	40459.8	34082	40766.4	36577	34286.7	32019.5
MA1103.3	FOXK2	3581.53	821.109	781.013	467.544	556.694	509.589	420.925	395.78	549.803	473.719	317.697	257.837	371.26	337.975	398.397	582.889	289.609	490.551	656.834	356.563	360.87	408.961	318.892	413.165	326.408	465.034	318.503	354.634	279.362	318.374	496.986	132.564	1278.88	382.958	333.068	801.278	549.297	440.359	349.516	554.06	759.114	346.178	469.303	409.561	467.321	391.766	316.288	337.97
MA1104.3	GATA6	664.4	754.891	1288.19	924.582	852.155	822.978	685.084	695.384	755.755	730.997	885.526	691.302	828.944	647.356	541.3	912.004	834.83	676.461	1212.92	661.219	550.499	604.627	696.528	800.383	615.204	612.802	659.414	638.593	433.012	534.653	983.747	191.083	509.664	714.217	426.744	723.813	532.283	681.561	594.962	604.849	638.586	724.764	541.252	608.027	565.557	738.759	580.614	657.163
MA1105.3	GRHL2	1100.41	1785.91	1542.02	1601.38	1235.9	2019.27	1929.34	2050.7	2244.58	1855.85	12483.6	14296.9	13983.7	2221.45	1878.15	1559.33	13385	1327.93	2533.99	2027.98	1864.11	1443.7	1775.73	1614.74	1524.58	2166.54	1643.73	2573.3	1401.11	2199.06	1290.53	632.962	1124.72	1811.39	3395.74	1655.81	1570.11	1719.39	1794.7	1452.1	1387.13	1873.78	1756.21	1723.04	1998.39	1760.15	1574.66	1988.18
MA1106.2	HIF1A	0	0	0	0	0	0	0	0	0	0	0	0	0	0	0	0	0	0	0	0	0	0	0	0	0	0	0	0	0	0	0	0	0	0	0	0	0	0	0	0	0	0	0	0	0	0	0	0
MA1107.3	KLF9	229175	230495	151253	193112	175661	200625	115147	107747	212429	196630	205054	205452	242934	171794	194135	194748	261203	169371	42821.5	116623	215304	122903	140202	126217	184393	151043	140998	139795	117488	129847	153109	44954	167519	101645	118433	133838	86256.6	143493	114421	155869	144060	107577	120593	137926	161916	149218	116476	96031.4
MA1108.3	MXI1	0	0	0	0	0	0	0	0	0	0	0	0	0	0	0	0	0	0	0	0	0	0	0	0	0	0	0	0	0	0	0	0	0	0	0	0	0	0	0	0	0	0	0	0	0	0	0	0
MA1109.2	NEUROD1	9763.57	6574.17	4300.81	8610.17	11240.2	7925.41	6385.06	7244.58	10873.1	7884.88	6000.3	7048.79	5925.55	8821.11	9628.95	26286.5	5395.54	5966.29	8932.7	6989.11	7856.4	5353.5	6837.73	6241.39	6162.79	8103.33	6413.28	8073.28	8618.33	8934.62	6878.05	3993.63	7347.66	10728.6	7055.58	13064.9	5441.93	8152.17	8983.34	8682.58	8633.6	9645.84	8463.81	5481.26	7021.04	7208.5	8521.69	10543.8
MA1110.3	Nr1H4	0	0	0	0	0	0	0	0	0	0	0	0	0	0	0	0	0	0	0	0	0	0	0	0	0	0	0	0	0	0	0	0	0	0	0	0	0	0	0	0	0	0	0	0	0	0	0	0
MA1111.2	NR2F2	1885.93	1352.18	1018.17	729.334	1787.18	826.69	775.194	824.356	2608.73	776.826	1323.98	2210.92	1279.33	814.703	1036.2	1143.97	1193.69	1862.22	909.303	767.828	1102.15	884.906	897.934	864.254	878.48	1036.55	782.654	1369.32	936.938	1007.51	1012.38	431.728	1127.87	1102.92	1946.37	1338.69	782.627	1152.9	1134.94	1022.7	1391.36	1288.96	1329.42	840.773	954.289	1018.59	1009.86	1224.62
MA1112.3	NR4A1	3453.5	6405.98	1916.34	1837.78	4822.88	2646.04	2885.17	2456.23	4412.75	2495.19	3530.6	4268.63	3666.34	3072.25	6383.01	2579.38	3442.57	3652.58	2580.15	2524.29	3396.09	2362.1	2484.01	2774.4	2296.94	2559.86	2336.76	2584.66	2185.47	2602.07	2341.77	1027.07	2779.56	3264.72	2678.86	3006.61	2729.47	2516.02	2929.65	2458.64	2738.31	3498.61	3283.49	2233.64	2286.08	4597.66	2635.35	3454.8
MA1113.3	PBX2	1231.91	955.533	1829.19	811.636	517.058	492.09	433.269	428.133	552.788	432.881	583.642	404.816	424.819	379.226	2300.68	764.299	435.673	504.612	476.868	430.032	459.707	472.42	552.188	413.165	378.794	1229.95	588.991	499.768	1167.95	566.893	1736.38	332.603	1324.5	909.526	568.558	1074.83	340.272	626.239	789.356	503.271	1497.08	992.867	735.841	467.296	682.036	472.918	1696.66	1174.55
MA1114.2	PBX3	6974.47	5063.07	24969.1	10618.7	5873.21	10774	8776.89	8916.34	11769.1	10873.3	8449.87	5602.66	5969.37	10911.8	8401.59	6225.42	5540.35	6258.44	10751.6	8598.24	6796.77	15135.1	7774.26	6945.97	7690.06	17956	7498.44	10180.9	12493.9	11223.7	5740.91	5095.34	5895.74	13685	12641	7792.49	7374.19	7853.44	11746.1	7025.02	6806.65	12615.6	11943.5	9488.46	16032.1	7877.3	11079.1	13439.5
MA1115.2	POU5F1	503.491	905.207	624.334	571.735	888.188	639.505	586.333	611.176	825.6	513.195	833.774	665.145	657.312	713.92	541.3	1173.71	692.543	993.601	911.37	574.973	1110.19	789.717	706.599	828.327	920.12	897.473	651.412	667.62	435.161	565.55	926.481	256.17	679.552	781.235	558.15	764.966	768.044	1009.06	712.777	805.696	807.748	879.439	660.622	828.143	787.289	903.861	602.076	801.113
MA1116.2	RBPJ	0	0	0	0	0	0	0	0	0	0	0	0	0	0	0	0	0	0	0	0	0	0	0	0	0	0	0	0	0	0	0	0	0	0	0	0	0	0	0	0	0	0	0	0	0	0	0	0
MA1117.2	RELB	28955	41026.3	15533.1	36105.1	19138.4	17139.9	15989.4	16804.5	15858.9	16670.5	24415.2	14536	21918.9	15385.6	19463.9	19805.3	19277.9	23652.7	26035.2	16344.4	15210.6	13397	20434.3	13067.6	18595.8	12940.6	18684.5	11768.5	23754.4	16887.2	18488.7	7747.81	15623.4	23253.2	18759.8	17216.6	13268.2	12850.1	16820	12307.1	15687.6	27004.8	19660	15375.7	10863.5	14937.5	28505.4	23217.7
MA1118.2	SIX1	1199.03	1091.28	1674.41	977.115	825.132	1091.29	1433.94	1016.71	967.081	905.239	1035.03	1221.92	1003.01	1170.02	1004.65	962.56	1065.26	943.609	1188.47	965.076	845.861	782.666	824.085	742.5	706.545	893.127	825.868	788.776	1198.03	896.014	1116.69	447.253	858.878	1093.35	1376.51	912.634	636.796	896.208	983.75	904.965	1086.86	1079.78	904.267	721.693	914.995	915.054	1302.43	1264.26
MA1119.2	SIX2	1086.57	1028.37	1425.35	834.4	868.37	1434.91	2405.41	1506.89	1066.77	1321.33	802.148	622.794	1229.42	1267.06	984.856	996.265	959.487	1049.84	948.913	1494.93	872.294	657.51	793.875	764.456	679.68	927.896	793.858	817.803	1196.96	1221.1	1016.47	456.807	633.934	1256.1	1014.82	861.798	712.142	1037.83	1081.93	881.879	835.236	1336.1	1133.2	635.09	893.945	948.634	1442.5	1691.93
MA1120.2	SOX13	2122.97	2542.79	2539.24	3695.7	2125.88	1930.18	1756.94	1751.09	1767.61	1757.84	1677.61	1593.11	1317.06	1817.85	4889.64	2095.63	1377.53	2148.12	4384.8	1692.58	1718.16	2764.01	1569.29	792.399	1081.31	1301.66	1653.34	1775.69	2764.61	2015.02	6213.35	908.24	5208.33	3061.75	2801.16	5947.86	1951.71	6514.66	1843.79	2264.72	6635.37	2446.81	1921.36	2726.2	1316.36	1183.69	2773.17	3269.13
MA1121.2	TEAD2	2417.1	3055.98	2214.93	18210.6	3251.88	3147.15	2638.7	3004.03	2386.66	3407.69	2468.26	2399	2149.66	3030.53	3022.62	2678.51	2133.03	4871.14	3222	2873.67	3597.21	2150.57	1701.88	1610.75	1543.38	2151.33	1573.31	1903.16	3323.34	3487.33	2071.8	1597.33	1912.81	4719.96	3996.82	2517.61	3628.76	1998.21	4533.89	2040.79	2000.34	4725.69	4241.72	2219.21	1712.11	1732.17	3771.73	5303.2
MA1122.2	TFDP1	9318.9	9265.29	21142.6	13204.2	26730.3	24999.5	35440.8	31532.1	15382	24153.3	19619.6	19625.5	24621.2	23671.9	24668.4	26533.4	24324.6	27260	22028.6	32373.4	31557.8	28160.1	25096.8	40923.3	43807.1	21393.8	28647.7	25716.6	36273	35120.5	22967.7	8652.47	28432.6	16423.2	24362.1	18463.3	56315.1	32079.8	32795.6	37124.3	30512.6	20831.1	37869.7	35548.8	35335.4	24297.9	31291	19863
MA1123.3	TWIST1	7628.49	5879.54	5932.36	3679.07	7516.26	5420.41	4915.32	5279.87	8030.35	5778.55	4207.68	4443.02	4559.8	6657.79	5902.33	27680.3	4224.52	4568.06	5999.33	5126.04	6062.39	3844.58	5080.46	4498.91	4748.36	6136.72	4862.38	6322.83	6706.84	5365.34	4679.44	3095.54	4728.55	8312.11	5178.17	10353.7	4017.65	5841.95	7066.9	5720.67	5965.07	7738.18	6303.71	4036.07	5425.42	5342.01	6983.18	8086.24
MA1124.1	ZNF24	1975.9	1521.04	4574.64	6143.74	2396.12	2252.05	1777.93	1890.7	1663.74	2249.26	2466.82	3013.08	2323.72	1767.69	1521.83	1991.54	2368.5	1854.41	2288.59	1663.03	1812.4	2106.5	1300.75	1249.48	3393.03	1447.26	1219.6	1408.44	1493.51	1405.14	2695.59	681.927	1999.33	1991.38	1343.98	2043.14	1195.81	1579.98	1816.3	1586	1909.41	1726.47	1530.55	1715.83	1359.86	1762.95	1296.78	1998.61
MA1125.2	ZNF384	5405.17	56583	12238.1	2945.35	17509.7	3632.88	7722.31	4423.6	5769.05	3131.35	16396.6	4852.81	11838.9	5570.26	4261.73	17312.2	11983.5	6956.77	5948.88	5058.16	4698.21	8759.16	10518.4	14379	15519.8	13494.7	10984.4	10671.8	12767.9	8120.55	5487.3	5477.51	5161.13	10092.9	8845.83	5582.32	7575.92	6558.92	7848.4	4605.62	6648.06	12519.9	12833.1	15188	8074.97	16823.6	14437.4	9025.04
MA1126.2	FOS::JUN	14052.8	539.681	862.447	3274.56	778.29	557.313	968.581	538.934	579.651	460.106	743.209	663.899	600.102	915.486	455.31	555.133	543.961	551.48	473.768	499.907	505.678	653.984	926.467	642.702	670.277	443.304	1152.37	832.947	1020.75	726.752	1043.06	289.013	1124.72	572.523	1510.52	3439.93	1045.12	1163.96	775.611	1025.01	1351.18	951.621	958.229	846.186	722.734	467.321	1087.8	642.56
MA1127.1	FOSB::JUN	10734.2	480.746	928.643	3231.66	772.885	463.455	900.278	435.668	549.803	394.766	830.899	582.936	578.192	799.234	364.991	548.193	511.223	688.959	391.448	426.438	457.409	588.762	1028.85	588.811	690.426	384.631	1181.18	742.08	976.694	738.842	889.667	268.71	917.081	513.164	2508.42	2829.89	955.193	991.361	761.866	893.422	1165.1	823.461	918.984	746.953	649.759	447.733	1126.21	567.455
MA1128.2	FOSL1::JUN	539.825	1044.27	649.574	1430.65	727.845	795.934	715.532	772.945	687.105	704.679	330.635	868.176	338.394	692.357	650.178	538.28	329.902	709.269	685.766	742.673	473.498	500.624	480.017	542.903	522.521	560.649	478.555	618.4	503.927	541.37	513.348	250.796	542.698	578.267	634.912	571.304	539.575	692.625	655.833	713.352	539.203	595.131	683.515	526.836	597.834	528.884	503.801	698.888
MA1129.1	FOSL1::JUN	16969.9	443.664	837.207	4289.32	700.821	429.518	802.762	425.917	498.464	382.514	800.711	544.322	486.898	748.608	309.314	494.663	452.042	385.88	422.791	364.549	360.87	505.912	800.588	449.093	490.283	265.113	1045.14	605.78	934.789	585.7	887.622	231.091	1027.19	400.192	2004.92	3207.53	729.155	867.441	634.234	787.227	1038.23	783.688	842.129	660.349	544.506	307.816	1040.36	498.61
MA1130.2	FOSL2::JUN	543.285	1093.27	656.717	1243.28	738.655	842.598	772.725	812.39	818.437	740.526	350.76	419.764	359.087	757.046	715.753	574.959	352.568	773.322	804.423	775.814	504.529	548.219	530.369	578.831	564.161	621.495	532.973	694.123	566.246	574.953	584.931	278.861	600.9	631.881	705.168	653.611	578.463	723.605	712.777	791.844	570.921	673.205	765.275	584.572	663.793	565.263	528.652	765.647
MA1131.2	FOSL2::JUN	21176	548.951	961.503	5001.15	942.235	560.495	899.867	517.66	643.526	507.75	920.027	766.037	624.447	876.58	411.388	636.42	577.959	731.14	504.594	446.003	456.259	639.882	819.05	504.98	611.175	421.573	1056.34	716.84	1144.31	801.98	965.34	355.295	1077.53	687.41	2349.69	3251.11	789.918	1102	958.223	948.828	1220.08	1107.77	1093.95	741.54	665.196	411.354	1297.91	780.251
MA1132.2	JUN::JUNB	688.623	864.814	761.011	960.479	668.393	1015.47	1008.08	996.762	1014.24	942.9	415.45	895.578	1094.3	910.33	827.724	660.211	390.343	799.88	799.257	932.734	644.739	749.173	1394.74	800.383	705.202	788.82	761.847	806.444	659.725	851.683	687.191	314.092	704.721	769.746	737.694	825.486	848.251	909.485	771.684	1055.02	786.602	755.699	847.035	718.085	867.281	699.582	600.947	788.596
MA1133.2	JUN::JUNB	10457.4	508.558	948.168	3208.89	965.656	567.388	1008.08	508.353	605.321	508.204	734.584	576.708	524.633	874.704	503.563	933.812	512.482	918.612	534.216	485.133	507.976	673.375	943.251	624.738	738.783	523.707	1211.59	836.734	1171.17	878.551	979.656	338.575	1082.25	712.303	2037.44	3282.58	1001.37	1208.22	968.041	1078.11	1298.32	1166.69	1136.47	802.884	769.045	587.649	1264.02	740.612
MA1134.2	FOS::JUNB	569.239	1264.11	785.775	783.618	877.378	1075.39	986.685	1005.18	971.259	958.328	411.137	399.834	415.081	926.737	871.028	644.35	380.269	984.227	967.168	971.465	557.395	641.645	632.75	678.629	670.277	790.993	611.399	805.182	717.746	707.945	693.327	355.892	655.956	792.724	951.066	777.07	685.406	774.501	830.591	911.891	651.273	829.354	941.877	683.804	756.415	632.423	692.444	932.546
MA1135.2	FOSB::JUNB	551.937	1102.54	756.725	1060.29	733.25	1018.12	932.784	945.351	934.247	910.23	378.074	373.677	382.215	890.173	860.512	621.55	360.123	927.986	908.27	915.564	519.469	632.831	615.966	654.678	644.756	760.57	584.19	781.204	680.14	693.168	699.462	343.949	630.788	752.513	910.734	755.283	646.518	730.244	807.028	861.102	600.524	789.58	894.456	676.587	732.558	612.834	645.001	880.39
MA1136.1	FOSB::JUNB	13803.6	464.192	917.214	4319.97	697.218	438.533	982.982	409.962	510.404	374.347	819.399	523.147	499.071	776.734	304.984	537.289	459.597	446.808	398.853	376.527	407.99	544.693	904.648	496.996	599.086	310.747	1150.77	678.978	1036.86	613.911	865.124	245.422	950.114	400.192	2047.85	3185.75	816.654	982.51	675.469	851.867	1173.56	793.999	860.117	714.476	575.38	400.161	1073.12	496.523
MA1137.2	FOSL1::JUNB	536.365	1076.05	602.904	640.903	621.551	873.884	818.809	819.924	825.6	771.381	346.447	372.431	353.001	777.671	733.074	567.028	336.198	757.699	787.718	787.393	488.439	549.981	538.76	580.827	557.445	623.668	529.772	665.096	579.14	591.074	591.066	290.804	545.844	629.966	705.168	636.665	578.463	668.284	679.396	787.227	509.6	655.528	766.91	568.333	632.918	548.473	548.985	738.526
MA1138.2	FOSL2::JUNB	486.189	1097.24	607.19	1339.59	796.306	900.397	848.845	846.073	847.091	798.153	365.136	408.553	354.218	779.546	755.964	582.889	350.049	790.506	845.755	817.739	502.23	574.66	532.047	568.851	549.386	649.744	520.169	706.743	601.703	592.417	615.609	302.747	589.889	666.347	727.286	665.715	597.907	685.986	722.594	766.45	562.463	702.667	793.073	593.593	638.532	596.044	582.873	778.165
MA1139.2	FOSL2::JUNB	19189.7	480.746	831.493	4786.64	717.036	446.487	839.382	427.247	508.613	383.422	829.462	602.865	559.933	765.015	316.738	538.28	527.592	443.683	437.258	358.16	358.572	498.861	612.609	441.109	535.953	289.017	913.897	596.946	936.938	592.417	799.678	235.271	891.912	432.743	2024.43	2936.41	704.85	874.08	716.704	798.77	1076.29	801.365	843.765	671.175	575.38	319.01	1049.4	544.507
MA1140.3	JUNB	9711.66	458.232	978.171	2227.4	781.893	443.305	970.638	405.087	365.938	335.324	451.388	478.306	467.422	806.266	375.507	556.124	426.859	567.102	411.425	357.761	539.007	645.17	1236.97	828.327	874.45	475.9	1464.48	868.284	983.14	848.997	930.571	289.013	1151.46	587.841	1280.23	3285	1419.42	1321.08	824.7	1098.89	1465.36	827.88	1017.1	804.688	818.163	828.306	1100.23	573.714
MA1141.2	FOS::JUND	555.397	1054.86	634.335	1424.52	729.647	933.274	711.829	846.96	690.09	994.628	327.76	437.202	331.091	691.42	656.983	513.498	324.866	710.831	689.211	787.793	464.304	493.573	468.269	528.932	502.372	564.995	467.352	624.711	498.554	519.876	523.574	246.616	526.967	578.267	638.815	573.725	510.409	690.412	649.942	692.575	530.745	596.604	685.15	534.053	586.607	523.288	503.801	686.37
MA1142.2	FOSL1::JUND	404.869	975.399	482.894	638.277	513.455	760.937	560.822	685.634	555.773	842.62	263.07	732.406	255.621	561.573	532.02	437.167	232.946	492.114	569.865	619.294	394.199	410.723	370.922	407.178	388.197	421.573	369.72	475.79	395.405	415.095	419.268	195.263	383.821	423.169	412.432	443.003	427.771	453.636	502.674	524.048	372.156	444.875	516.724	413.17	443.464	355.388	360.342	525.731
MA1143.2	FOSL1::JUND	4903.41	286.726	528.136	1273.93	542.281	208.926	541.484	238	215.504	181.501	260.195	229.188	304.311	407.82	1159.93	299.375	328.643	412.438	182.033	180.078	244.794	340.213	570.65	313.367	364.018	208.614	726.636	318.034	459.873	377.481	415.178	146.298	523.821	227.86	1026.53	2006.83	529.853	491.255	416.277	457.1	539.203	380.059	500.372	387.91	346.632	268.64	568.188	173.157
MA1144.2	FOSL2::JUND	532.904	1115.12	677.671	767.858	801.711	1013.34	941.424	954.215	947.978	904.785	399.637	379.905	404.125	881.267	828.343	618.576	368.937	940.484	931.347	925.147	530.962	613.441	600.861	646.694	628.637	756.224	571.386	781.204	680.14	678.391	662.649	345.143	629.215	748.684	927.647	740.759	651.379	721.392	808.992	870.336	608.982	791.053	874.833	671.175	728.347	618.431	669.852	888.735
MA1145.2	FOSL2::JUND	19928.5	529.748	970.551	4962.62	893.592	540.875	1013.43	534.059	602.336	468.274	961.715	809.633	702.351	905.643	388.498	628.489	644.695	521.797	476.179	481.14	466.603	645.17	787.161	485.02	599.086	362.901	1075.55	714.316	1100.26	769.739	924.436	309.315	1091.69	639.54	2125.91	3297.1	780.196	1099.79	858.081	951.136	1266.6	1163.75	1030.18	737.932	649.759	360.985	1217.71	730.181
MA1146.2	NR1H4::RXRA	2448.25	3034.13	4108.41	4001.27	4540.03	3809.99	4232.29	3758.36	4311.27	5582.53	1492.17	2219.64	1463.13	4605.09	6543.23	2475.3	1332.2	2151.24	4123.9	3568.43	2837.54	2993.17	3121.79	3111.71	3382.28	2998.82	2965.76	3418.87	3014.96	4459.92	3493.22	1365.64	3220.01	3716.61	3782.15	3553.7	3033.29	5379.46	3342	3839.17	3935.13	3229.03	3921.22	2942.7	3303.53	2882.28	3664.42	3260.78
MA1147.2	NR4A2::RXRA	4505.46	5578.91	6414.3	6403.78	5909.24	5277.24	5612.75	5239.09	5837.11	6921.56	2189.38	3471.46	2100.97	6013.24	8496.24	4012.82	2057.48	2904.25	5642.67	4929.59	4054.62	4195.37	4825.35	4684.54	5202.37	4463.46	4787.15	5444.45	4265.65	6260.01	4865.56	1935.91	4566.53	5022.5	5137.84	4933.55	4630.14	6935.1	4769.52	5314.36	5463.93	4603.43	5708.49	4353.62	5540.49	3942.85	5333.97	4297.64
MA1148.2	PPARA::RXRA	10780.9	11371	10265.6	12414.4	11706.8	15984.4	16208.3	14738.7	17866.5	15764.3	11645.5	12133.3	13112.2	15207.5	17613.6	11005.5	12470.8	11324.9	15373.8	14235.4	10722.7	9050.01	10318.7	9173.47	8753.9	10719.7	9825.59	9618.02	9842.15	10652.8	15467.9	4068.27	12491.5	11324.1	18347.4	13333.7	8212.72	11657.3	9678.45	10298.6	13442	11995.4	10079.4	10724.4	9984.96	11436.8	12313.8	11165.5
MA1149.2	RARA::RXRG	25513.7	17630.7	36645.7	40491.6	25883.5	41312.8	43589	44336.2	35368.9	41853.3	22290.5	31510.9	26960.8	33758.6	36657.4	25475.6	25557.4	28605.1	35827.1	43997	29204.1	27994.4	38060.7	29426.6	32501.1	28808.2	39291.2	48735	36799.5	39044.4	58818.2	13460.6	62166.4	33960.7	35704.7	51245.5	29958.6	43549.1	32230.1	38410.2	60456.3	34984.6	35266.4	37244.8	33871.7	28375.1	43847.6	31475
MA1150.2	RORB	2650.68	8552.78	2002.54	2357.86	1996.17	2494.39	2051.55	2325.48	2291.14	2531.04	2382.01	2379.08	2334.68	2354.11	2243.15	1654.49	2384.87	1840.35	3380.44	2100.25	2699.63	1882.63	2423.58	1381.21	1344.58	1395.1	2379.97	1818.6	3037.53	1941.14	16881.2	872.412	10957.8	2537.1	4108.71	13624.1	1633.31	4901.48	1871.28	2777.23	15503.7	2999.23	2137.21	2419.48	1702.28	1634.22	4187.42	2538.94
MA1151.2	RORC	2564.17	6051.71	2544.01	4817.28	3340.16	5233.23	16720.6	4971.84	3734.01	5321.62	3171.22	3431.6	3200.14	5349.48	3375.85	2993.75	3252.44	2530.87	4084.8	4814.6	2966.26	2480.2	2917.03	2447.06	2374.85	2892.34	2954.56	3346.93	3290.03	2701.48	11608.6	1415.21	6962.26	4034.47	5051.97	7828.8	2714.89	4830.67	2913.94	3536.75	9215.09	3860.99	3321.1	3399.18	2552.72	3100.55	5449.19	3700.98
MA1152.2	SOX15	0	0	0	0	0	0	0	0	0	0	0	0	0	0	0	0	0	0	0	0	0	0	0	0	0	0	0	0	0	0	0	0	0	0	0	0	0	0	0	0	0	0	0	0	0	0	0	0
MA1153.2	Smad4	998.33	847.597	453.844	552.473	472.019	645.868	494.577	691.839	656.063	654.313	327.76	246.627	406.56	675.951	554.291	402.471	415.526	339.012	485.823	555.009	345.93	195.666	189.657	319.355	228.351	325.959	172.856	222.119	137.532	201.502	216.792	82.4044	117.978	239.349	199.06	191.242	311.106	172.603	151.195	163.909	154.36	206.234	235.469	263.418	449.077	380.573	141.2	216.968
MA1154.2	ZNF282	9076.67	10204.3	13613.9	36476.3	10535.7	13401.5	12472.6	11519.7	11723.2	13386.2	9171.52	9273.41	9571.2	11902.7	10161.6	11118.5	9276.3	8658.08	14142.4	10786.3	8709.15	9480.13	9380.48	9484.84	8393.91	9752.68	10075.3	9954.98	11280.9	10969.8	11070.7	5045.18	9340.69	12725.7	12315.7	13043.2	9884.92	11500.2	11102	9181.24	10727	12269.4	11014.7	10040.6	9937.24	11364	11861.9	12703.1
MA1155.1	ZSCAN4	4303.03	11454.5	5714.25	3396.26	4460.75	3887.93	4644.58	4264.49	5507.58	4093.31	3307.78	3059.17	3293.87	3681.63	3453.8	2854.97	3146.67	2708.97	4335.72	4212.87	3875.33	2575.39	3079.83	3113.71	3094.83	4400.44	3050.59	4306.09	2627.08	2988.95	2624.01	1426.55	2098.43	3410.24	2742.61	2570.87	2744.05	2971.87	3047.46	2557.91	2660.07	2918.2	2889.4	3207.93	4120.29	3623.84	3369.59	3588.32
MA1418.2	IRF3	1965.52	4283.67	4396.05	2993.51	7418.98	2970.04	2367.14	2613.56	3704.16	2686.68	9881.66	5882.92	10063	3667.1	2655.15	4611.57	10131.3	6010.04	3762.59	2435.65	4421.23	5921.11	6894.79	5305.28	4267.48	6434.42	6779.8	4833.62	6279.21	6738.24	9021.43	6911.82	7833.72	8815.7	6903.36	6637.78	6581.84	7984	6848.94	5937.68	8255.1	7758.8	5471.39	6699.12	3575.78	6956.65	7978.36	8376.22
MA1419.2	IRF4	622.875	1121.74	1182.47	363.354	560.297	986.301	786.303	648.405	522.343	799.968	623.893	464.605	533.154	450.946	449.743	641.376	627.067	701.457	743.287	623.287	559.694	1390.82	693.172	754.476	1168.62	1060.45	643.409	808.969	1187.29	902.731	822.175	591.162	698.428	1168.02	958.873	697.185	405.896	577.556	862.008	671.798	754.885	1330.21	994.203	1686.96	847.634	635.221	1293.39	1441.59
MA1420.1	IRF5	2422.29	2101.11	4213.18	1880.68	2433.96	2457.27	2229.3	2013.02	1173.03	2304.16	1605.73	1636.7	1449.74	1935.97	1722.88	1573.21	1596.63	1537.27	2255.18	1958.5	1502.09	5325.3	2641.77	2089.78	5000.89	3542.08	2570.43	2744.94	3822.97	3284.49	2634.23	1635.55	2718.21	3804.69	3870.62	2706.43	1623.59	2418.66	3212.4	2308.58	3006.85	4285.24	3375.06	11366.7	3674.01	1992.41	4402.05	3692.63
MA1421.1	TCF7L1	3095.34	1919.01	2327.8	5427.54	2289.83	1477.86	1367.29	1477.19	1703.14	1441.12	2440.95	2303.09	2620.73	1803.32	1349.85	2280.01	3110.15	2282.47	1899.55	1486.15	2373.24	1574.15	1659.92	1714.54	1347.27	1857.96	1466.08	1684.83	1402.18	1509.92	1992.04	1108.28	1884.5	2408.81	1980.2	2379.63	1742.68	4558.49	1934.12	1678.34	2292.14	2066.75	1718.6	1723.04	1547.91	2157.51	1832.21	2196.8
MA1463.2	ARGFX	377.185	185.412	1874.43	460.54	180.16	164.914	192.564	179.497	489.51	148.377	437.013	473.324	516.112	158.441	204.766	256.749	497.372	265.585	171.872	152.528	140.211	172.75	468.269	173.649	189.397	147.768	637.007	336.965	396.48	206.876	2319.27	131.966	821.125	545.716	269.317	762.546	221.177	327.503	353.443	330.127	771.801	623.12	403.895	317.545	218.925	173.496	852.847	404.729
MA1464.2	ARNT2	3318.54	2790.45	6254.77	1526.09	1385.43	1928.06	2262.63	2093.69	2746.03	1726.08	1657.49	1959.31	2085.14	3102.72	2360.07	1469.12	1869.87	1920.02	2953.69	1990.84	3355.86	1861.48	3825.03	4245.42	3069.31	2748.92	3959.69	3291.4	2168.28	2817	2632.19	901.075	4011.24	2397.32	2824.58	5093.32	6477.33	5463.55	2754.89	4388.62	4842.26	2533.73	2917.2	2244.47	4089.41	2879.48	1950.82	2367.87
MA1466.2	ATF6	1212.88	831.704	1335.34	605.881	659.385	1004.86	2006.29	1040.2	1047.67	952.883	648.331	767.283	657.312	1356.59	1171.68	904.073	668.619	1526.33	1128.36	956.292	1277.99	1032.98	2245.67	1552.86	1675.02	1453.78	2213.52	1784.53	1204.48	1207.67	971.475	437.699	1234.83	1058.88	1208.67	1391.95	1997.89	1703.9	1146.73	1569.84	1287.74	938.363	1236.21	1253.94	1716.32	1346	1430.07	1011.82
MA1467.3	Atoh1	6275.47	4477.69	2443.52	5374.13	3104.15	4508.35	3766.52	4077.02	5519.52	4279.35	4092.68	4248.7	4274.97	5374.79	4493.71	25622.3	3749.81	3905.66	4873.04	3851.52	4776.36	3856.92	3494.39	3488.95	3179.45	3937.58	3308.27	4675.86	2814.04	3155.53	4548.55	1408.04	4737.99	4160.84	3891.44	5054.59	3145.09	4370.4	3720.97	4838.79	5072.74	3392.54	3471.54	3550.73	3511.22	4133.13	3042.01	4295.55
MA1468.1	ATOH7	1572.76	2064.03	1402.97	1304.57	1331.38	1294.39	1357.82	1191.77	2503.07	1235.12	1118.41	927.964	741.303	1256.74	1534.2	1429.47	865.05	1418.54	1610.4	1141.16	1335.45	950.128	958.356	1089.8	920.12	1188.66	862.68	1197.68	572.693	890.641	2196.56	267.516	2081.13	905.697	771.522	1740.54	962.485	1405.17	781.502	1288.19	2490.91	795.472	909.173	1248.53	1173.21	1220.07	579.484	982.615
MA1470.2	BACH2	5465.73	264.874	451.94	298.563	300.867	236.5	223.424	234.897	228.637	173.788	221.381	236.662	301.877	261.099	201.054	596.768	234.206	257.774	238.52	196.848	210.316	241.498	379.314	233.528	218.948	191.229	393.728	324.345	238.532	190.756	409.042	99.7213	390.113	189.564	473.582	905.372	306.245	416.018	204.212	401.694	615.326	265.157	266.538	272.439	228.749	263.043	385.193	168.985
MA1471.2	BARX2	307.977	359.567	434.319	359.851	273.843	238.621	182.689	233.568	262.664	230.053	219.944	164.418	197.194	290.162	238.172	325.149	183.839	232.778	199.771	217.212	186.181	151.597	144.341	191.613	143.727	210.787	140.846	198.141	160.096	103.438	280.194	69.8646	125.843	243.179	136.61	324.385	114.234	146.049	133.523	147.749	412.332	260.738	174.967	171.402	192.261	212.673	155.885	225.313
MA1472.3	Bhlha15	8581.83	10751.2	7173.89	9643.32	14347.9	20033.6	17499.5	20285.4	26512.3	20191.1	17210.2	11040.9	8498.81	26163.3	23903.8	11320.7	8333.19	10445.3	15113.7	19416.5	16473.6	12314.6	21990.2	19133.4	19525.4	24320.9	20829.2	19064.4	21867.6	20950.9	17237	11090	20068.8	30510.3	19424.7	31997.9	16853.2	25217.7	27709.9	24327.9	22084.1	26975.3	24394	13167.3	21676.4	19588.3	20814	29828.9
MA1473.2	CDX4	1212.88	1084.66	984.362	750.347	466.614	488.378	1170.61	530.07	433.992	363.457	504.577	1064.98	695.047	375.945	567.282	674.09	639.658	492.114	403.503	496.313	375.811	380.756	528.69	419.153	372.078	430.265	518.568	431.618	323.416	404.348	891.712	156.449	462.473	660.603	575.063	459.948	388.883	342.993	498.747	385.534	560.348	483.176	466.033	460.079	401.363	486.909	429.248	619.611
MA1474.2	CREB3L4	3801.27	1870.01	3440.74	1668.8	3504.11	2561.2	4608.37	2988.96	2237.42	2237.46	2364.76	3527.51	2757.06	3927.26	2857.44	2960.05	2617.81	2796.46	3499.61	2716.75	3401.83	3116.56	5641.04	4441.03	4436.73	3305.22	5947.53	4807.12	3054.72	3825.86	4067.93	1055.73	5268.1	2764.96	3005.42	6364.23	6443.3	6946.17	3532.47	6632.56	6182.86	2875.49	3895.05	3996.38	4920.2	3492.32	4107.22	2563.98
MA1475.2	CREB3L4	11236	409.23	966.741	2642.41	830.536	382.324	1006.85	366.528	383.847	350.298	598.017	495.744	480.812	768.765	366.228	1089.45	475.966	1299.81	369.06	324.62	497.633	639.882	1112.77	790.403	848.928	528.053	1344.44	816.541	896.108	791.233	861.034	265.724	1069.67	539.971	1415.54	3045.34	1358.66	1139.62	830.591	1098.89	1334.26	849.977	1031.81	788.45	857.457	716.372	1066.34	563.283
MA1476.3	Dlx5	337.391	358.904	1442.97	1716.08	363.923	365.356	308.185	684.304	2463.07	332.148	511.765	409.799	396.822	311.256	340.245	360.836	410.489	409.314	353.733	837.703	371.214	236.21	485.052	596.794	323.721	343.343	478.555	354.634	205.224	260.61	1145.32	98.5271	739.327	314.026	644.019	716.551	301.384	365.122	267.046	417.854	917.703	343.232	266.538	238.159	286.287	391.766	248.512	267.038
MA1478.2	DMRTA2	0	0	0	0	0	0	0	0	0	0	0	0	0	0	0	0	0	0	0	0	0	0	0	0	0	0	0	0	0	0	0	0	0	0	0	0	0	0	0	0	0	0	0	0	0	0	0	0
MA1479.2	DMRTC2	269.913	797.933	487.18	733.712	461.209	246.575	192.564	227.363	249.531	213.264	211.319	181.856	180.152	211.41	252.4	267.653	159.915	287.457	293.285	226.396	235.6	250.312	134.27	123.75	221.635	252.075	118.439	180.472	112.819	189.412	251.561	46.5764	133.708	181.905	507.409	246.92	114.234	210.222	174.758	168.527	209.338	324.081	161.885	193.053	136.127	165.101	144.589	202.364
MA1480.2	DPRX	588.271	854.881	1559.64	876.427	1131.4	1370.75	1041.41	1116.87	1362.27	1199.72	1007.72	949.139	775.385	1124.08	1641.22	1237.15	974.597	1291.99	1478.65	1042.54	1035.49	1108.78	990.245	1153.67	877.136	2449.04	1006.73	1424.84	1718.08	1563.66	1118.73	951.234	762.923	2251.8	1628.91	1130.5	1314.91	1062.17	2104.95	1212.01	1110.12	1888.51	1903.38	1096.97	1080.59	1208.88	1618.72	2140.47
MA1481.2	DRGX	0	0	0	0	0	0	0	0	0	0	0	0	0	0	0	0	0	0	0	0	0	0	0	0	0	0	0	0	0	0	0	0	0	0	0	0	0	0	0	0	0	0	0	0	0	0	0	0
MA1483.3	ELF2	8521.28	1348.87	2680.21	1673.18	2567.28	2138.05	3913	2231.97	1749.1	1765.56	2248.32	1398.8	1973.15	2100.51	2450.39	1932.06	2094	2387.14	2748.58	2238.4	2939.83	3003.74	694.85	1281.41	846.242	758.397	859.479	1029.83	1878.17	1238.57	2079.98	650.279	1437.76	894.208	1397.33	1614.66	1125.33	1458.27	993.567	1876.88	1860.78	1286.01	1234.58	1560.66	1077.79	1150.11	1327.28	826.148
MA1484.2	ETS2	6360.25	1453.5	4271.28	1336.09	2516.83	1719.13	2061.42	1804.28	1700.15	1441.58	2100.25	1164.63	1866.04	2118.79	1983.94	1486.96	1571.44	1745.05	2074.35	1831.13	2641.02	1452.51	805.623	1455.06	881.166	684.513	941.106	1142.15	1627.82	1210.36	2456.3	341.56	1562.03	792.724	1286.74	1556.56	1273.59	1637.52	1060.33	1980.76	2161.04	1110.71	1113.57	1320.7	1049.72	1211.68	886.735	751.044
MA1485.1	FERD3L	7133.65	7442.3	5642.34	4956.49	3509.51	8538.4	9033.64	10026.6	12653.8	9061.46	4321.25	5835.58	4713.17	11941.2	12143.7	10199.6	6553.98	7228.6	10321.6	10116.7	8487.34	8045.24	12176.7	12351.1	10938	11093.5	12351.2	11132.5	17022.8	14447.7	8816.91	7224.12	10421.4	18540.9	9528.88	11491.4	14568.5	12783.7	17735	12965	10735.4	17437	15820.6	9475.83	17290.9	9984.44	17459.1	16666.9
MA1487.3	FOXE1	612.494	3185.11	1389.15	794.125	1062.94	750.861	890.403	807.071	878.133	690.159	667.019	518.165	720.609	525.01	836.385	1178.67	666.101	640.529	929.797	874.837	656.232	1221.59	830.799	1225.52	1254.59	1355.99	758.646	920.028	868.172	828.846	644.242	380.971	682.698	1286.74	1007.01	493.839	418.049	593.046	1015.17	537.9	558.234	1078.31	1625.39	1685.15	1111.47	1043.78	867.532	1170.38
MA1489.1	FOXN3	2956.93	137.072	125.248	123.453	153.136	84.3128	85.584	85.538	69.8447	137.941	73.3146	59.7883	111.987	67.5013	58.7697	128.87	83.1052	115.608	146.04	69.8752	80.4488	70.5104	45.3163	73.8508	75.2215	160.806	60.8198	68.1502	45.1278	80.601	71.5824	16.7197	361.798	76.5917	85.8692	45.9948	65.624	106.217	72.6522	53.0974	65.5502	69.2356	163.52	68.5609	186.648	81.1516	62.1279	81.3631
MA1491.3	GLI3	25581.1	30572.4	17895.7	24606.5	12569.7	19123.6	20051.8	19317.9	20564.2	18658.8	19023	24653.9	19122.9	16857.5	22383.8	16553.9	19505.8	17569.2	25786.7	19482	21813.1	17283.9	22171.4	17474.7	23401.9	17330.1	23061.9	23935.9	20114.1	20863.6	22468.7	5540.21	24391.5	15596	20109	23379.9	19560.8	20316.3	17581.8	22626.4	24822.4	16665.1	19269.2	19458.7	22897.3	15449.6	24153.1	14213.5
MA1493.1	HES6	3444.85	1464.09	3489.79	2691.44	1430.47	2696.42	3069.5	2852.01	4730.34	3178.54	2065.75	2687.98	1903.77	3059.12	2833.94	2281	2115.41	2424.64	3511.84	2899.22	3286.91	2480.2	4915.98	4594.72	3892.71	3370.41	5068.85	4159.69	2780.73	3870.19	2758.99	1347.13	3363.15	3197.7	3750.92	4359.82	6559.97	5481.25	3689.55	4233.94	4042.97	3522.17	3880.34	3177.26	3794.7	3598.65	3290.52	2843.53
MA1494.2	HNF4A	5578.19	4183.02	3468.36	3504.83	5584.95	5199.82	4747.44	4790.13	7037.6	4896	5075.96	13520.9	8384.39	5009.16	5048.62	4683.93	7617.98	4743.04	5583.43	4828.57	4856.81	3195.89	3642.09	3674.58	3333.92	3720.28	3580.36	3908.54	3547.9	3923.92	4800.11	1304.14	4568.1	4319.77	3926.56	5185.31	3803.76	4450.06	3758.28	4016.94	4964.9	4246.94	4205.74	4447.44	3821.37	4166.71	6334.79	4203.76
MA1495.2	HOXA1	0	0	0	0	0	0	0	0	0	0	0	0	0	0	0	0	0	0	0	0	0	0	0	0	0	0	0	0	0	0	0	0	0	0	0	0	0	0	0	0	0	0	0	0	0	0	0	0
MA1496.2	HOXA4	674.781	342.35	1121.52	591.872	246.819	251.348	270.742	252.625	192.222	242.758	231.444	235.416	215.452	269.068	290.137	259.723	229.169	849.872	270.897	243.166	226.406	220.345	313.857	197.601	209.546	234.69	308.9	291.532	199.851	227.026	1648.44	79.4188	1192.36	204.883	222.479	1101.45	226.038	351.845	202.248	277.03	1061.49	215.072	186.413	286.873	193.665	265.841	282.4	212.796
MA1497.2	HOXA6	654.019	317.187	751.963	1359.73	270.24	269.377	212.726	461.817	259.679	347.122	260.195	191.821	206.932	178.129	226.418	191.322	206.504	253.087	324.628	564.192	205.719	192.141	369.244	267.46	216.262	230.344	419.336	379.875	265.394	321.06	1315.07	108.081	688.99	268.071	209.469	728.655	221.177	325.29	286.682	318.585	742.197	319.662	268.173	290.482	289.094	263.043	395.36	212.796
MA1498.3	HOXA7	0	0	0	0	0	0	0	0	0	0	0	0	0	0	0	0	0	0	0	0	0	0	0	0	0	0	0	0	0	0	0	0	0	0	0	0	0	0	0	0	0	0	0	0	0	0	0	0
MA1499.2	HOXB4	0	0	0	0	0	0	0	0	0	0	0	0	0	0	0	0	0	0	0	0	0	0	0	0	0	0	0	0	0	0	0	0	0	0	0	0	0	0	0	0	0	0	0	0	0	0	0	0
MA1500.2	HOXB6	295.866	324.471	1365.82	1702.95	290.057	359.523	321.763	704.692	2498.89	325.341	467.201	475.815	387.084	359.07	339.627	388.593	411.749	404.627	396.27	866.452	378.109	239.735	389.385	572.843	317.005	334.651	326.506	309.2	149.351	167.919	711.734	87.1815	404.271	269.986	621.901	413.953	291.662	294.31	223.847	339.362	583.608	257.792	206.036	232.746	259.623	358.186	146.848	242.003
MA1501.2	HOXB7	654.019	317.187	751.963	1359.73	270.24	269.377	212.726	461.817	259.679	347.122	260.195	191.821	206.932	178.129	226.418	191.322	206.504	253.087	324.628	564.192	205.719	192.141	369.244	267.46	216.262	230.344	419.336	379.875	265.394	321.06	1315.07	108.081	688.99	268.071	209.469	728.655	221.177	325.29	286.682	318.585	742.197	319.662	268.173	290.482	289.094	263.043	395.36	212.796
MA1502.2	HOXB8	295.866	324.471	1365.82	1702.95	290.057	359.523	321.763	704.692	2498.89	325.341	467.201	475.815	387.084	359.07	339.627	388.593	411.749	404.627	396.27	866.452	378.109	239.735	389.385	572.843	317.005	334.651	326.506	309.2	149.351	167.919	711.734	87.1815	404.271	269.986	621.901	413.953	291.662	294.31	223.847	339.362	583.608	257.792	206.036	232.746	259.623	358.186	146.848	242.003
MA1503.2	HOXB9	545.016	652.914	389.554	183.866	162.144	102.872	395.415	99.2773	114.02	91.2045	231.444	227.943	283.618	150.472	198.58	181.409	343.753	131.23	193.571	104.613	121.822	95.1891	151.054	113.77	94.0269	63.0187	142.446	153.969	176.213	83.2877	355.867	39.4108	187.191	107.228	145.717	302.598	92.3597	95.153	106.033	115.429	270.659	142.89	119.37	128.101	164.194	156.707	118.608	114.743
MA1504.2	HOXC4	0	0	0	0	0	0	0	0	0	0	0	0	0	0	0	0	0	0	0	0	0	0	0	0	0	0	0	0	0	0	0	0	0	0	0	0	0	0	0	0	0	0	0	0	0	0	0	0
MA1505.2	HOXC8	0	0	0	0	0	0	0	0	0	0	0	0	0	0	0	0	0	0	0	0	0	0	0	0	0	0	0	0	0	0	0	0	0	0	0	0	0	0	0	0	0	0	0	0	0	0	0	0
MA1506.2	HOXD10	723.227	739.661	429.557	216.261	198.176	147.945	522.968	161.769	157.598	127.505	291.821	288.977	367.608	269.536	248.07	240.888	419.304	212.468	213.548	148.535	187.331	128.681	209.798	143.71	132.981	112.999	198.464	179.21	157.947	122.245	537.891	62.1019	385.394	158.928	232.888	624.561	131.248	130.559	149.232	145.441	410.217	181.191	160.25	162.381	178.228	201.48	170.569	164.812
MA1507.2	HOXD4	0	0	0	0	0	0	0	0	0	0	0	0	0	0	0	0	0	0	0	0	0	0	0	0	0	0	0	0	0	0	0	0	0	0	0	0	0	0	0	0	0	0	0	0	0	0	0	0
MA1508.2	IKZF1	4804.79	4218.78	24857.6	4530.98	4833.69	4622.36	4630.59	4146.6	5277.75	4474.01	5037.15	4160.27	4935.93	5277.29	5141.42	5068.56	5394.28	6044.41	4386.01	3957.73	7008.24	5034.44	4863.95	4057.8	3368.85	6725.61	5456.17	4985.06	5023.15	4402.16	4857.38	2328.22	3835.06	5815.22	5655.66	5197.41	4270.42	5153.75	5419.46	4607.93	4704.81	5616.92	5347.11	4685.59	6469.52	4843.91	4559.06	6162.73
MA1509.1	IRF6	2235.43	652.914	4894.66	874.675	799.909	1126.29	1736.78	1121.3	562.339	1241.47	918.589	2034.05	1040.74	799.703	802.979	977.43	938.082	674.899	878.649	981.048	759.666	1769.81	1106.05	1552.86	1383.54	943.107	1232.4	1085.36	827.342	1084.08	586.976	400.079	722.024	735.28	706.469	680.239	991.651	794.417	797.21	669.489	742.197	1082.73	1201.87	7397.36	1170.41	1152.91	1594.99	648.818
MA1511.2	KLF10	288462	308619	233911	209598	328361	144838	188437	173797	126046	138556	412924	435678	451563	130011	133395	373723	471487	378407	32213.8	173105	365858	283094	256081	250221	311199	277608	266579	256443	251540	263859	269669	79067.1	294498	207996	246945	256670	194410	276492	240528	300201	281836	215189	255471	256553	305833	280429	241176	199198
MA1512.2	KLF11	195131	186988	118594	125185	190427	203165	124278	116592	196937	196337	207699	215016	237353	192337	186928	225038	257967	202877	31190.5	118434	200781	119917	119944	120293	168491	135516	128038	116391	127251	130015	142938	34812.9	159382	86615.6	121483	124435	87316.3	137985	107492	153188	144794	96644	119501	131722	154157	145242	114601	83263.6
MA1513.2	KLF15	60510.6	44328.7	54589.9	53740.4	100589	89423.6	141902	117190	66237.8	86718.2	83226.5	90568	115822	96160.8	92857.9	131772	119332	161709	40340.5	120833	142655	102108	113240	147967	181937	67234.4	139804	87183.1	163055	155482	112577	29686.5	138054	50424.1	87573.6	74954.6	202076	148014	126063	180647	157523	74718.4	156958	145309	148633	83096.4	133200	74063.3
MA1514.2	KLF17	175364	155679	130656	122165	181954	152779	178859	173855	169391	149298	217895	216713	246904	146692	148913	160898	255041	186806	51597.6	175907	162771	133852	151429	134498	170651	140245	149738	146100	102892	126483	163065	41100.7	178747	110416	124921	151098	108005	144807	118189	154290	150979	107162	121430	148820	153262	159648	110681	105780
MA1515.2	KLF2	256671	212119	129271	143351	218471	76098.4	105963	91238.1	255464	72573.4	278716	294082	315856	229241	240794	296703	349538	265410	58819.3	91370.4	287963	155636	159879	161131	224798	184771	171184	159902	169805	180249	187159	50310.9	203458	123290	141138	159868	129204	189848	160940	210748	192462	137327	174589	176499	212596	182524	159319	119545
MA1516.2	KLF3	29507	22159.4	30199	29913.2	39091.1	44285.4	63346.6	54720.9	34703.9	47046.1	46462.8	52957.5	53323.9	44456.2	45654.8	36951	54051.1	51611	37817.7	56374.9	51724	35976.2	46549.9	40168.9	49968.6	40879.6	53975.9	29668.1	64203.9	57276.4	42419.7	13870.2	53261.5	27946.4	35957.1	42085.3	55165.5	61707.8	48547.3	68207.1	57849.1	34881.5	56533.9	46967.8	53647.9	25033.9	52689	32854
MA1517.2	KLF6	145033	127951	72935.2	86651.5	135181	166630	204597	188476	156129	159685	167351	183491	200978	145700	147628	180532	219976	163041	72111.2	187893	168617	78825.4	90199.6	86758.7	130253	107790	96335.3	88681.1	99942.9	101403	109638	28770.5	119628	72317.9	76547.2	99951.6	66134.4	106658	88468.7	116824	110604	78443.9	97731.2	98449.8	126641	104946	91620.6	68474.3
MA1518.3	Lhx1	806.277	319.173	489.562	1299.32	306.272	369.067	403.232	338.607	543.237	277.697	451.388	378.659	394.387	360.945	491.191	402.471	382.788	349.947	388.176	328.214	310.302	373.705	802.266	299.395	386.853	278.151	979.518	557.822	545.831	604.507	2401.08	204.22	1403.15	635.711	447.561	1321.75	456.937	601.898	608.707	609.466	1370.21	875.019	598.484	436.625	457.498	313.413	833.644	504.868
MA1519.2	LHX5	654.019	317.187	751.963	1359.73	270.24	269.377	212.726	461.817	259.679	347.122	260.195	191.821	206.932	178.129	226.418	191.322	206.504	253.087	324.628	564.192	205.719	192.141	369.244	267.46	216.262	230.344	419.336	379.875	265.394	321.06	1315.07	108.081	688.99	268.071	209.469	728.655	221.177	325.29	286.682	318.585	742.197	319.662	268.173	290.482	289.094	263.043	395.36	212.796
MA1520.2	MAF	704.195	1109.16	1374.39	1036.65	675.599	2184.71	2303.36	2460.22	2838.56	2122.66	1007.72	1190.78	1151.51	2044.73	2722.58	1311.5	1424.12	1340.42	1452.65	2458.41	1813.55	2206.98	2932.13	2397.16	2456.79	2729.36	2693.67	2150.52	2253.16	2184.29	2059.53	952.428	3315.96	2975.59	1982.8	3009.03	2221.49	2781.56	2892.34	3079.65	2717.16	2630.95	2544.38	2296.79	2474.14	2384.18	2012.95	2897.78
MA1521.2	MAFA	925.662	1304.5	1704.42	1449.04	1034.12	3390.01	3639.38	3736.2	4042.04	3404.97	1510.86	1631.72	1797.87	2964.9	4228.94	1759.57	2101.55	1952.83	2337.84	3801.21	2899.6	3588.98	4763.25	4437.04	4293	4719.88	4641.51	3373.44	3864.87	3770.78	3108.72	1460.59	4704.95	4379.13	3009.32	4120.17	4632.57	4591.68	4628.14	5041.95	4186.75	3971.47	4251.53	4027.05	4179.23	3478.32	3537.9	4420.73
MA1522.2	MAZ	188524	204501	215628	147662	291641	258942	131296	133551	228198	117204	251793	270279	292231	139319	229602	262754	300399	282890	0	130925	272729	204325	241449	246606	290214	217512	257156	232814	227936	232751	210422	70919.2	229516	169296	212641	201087	226123	241719	213621	258388	234207	180920	228171	228239	260309	238600	209884	171273
MA1523.2	MSANTD3	3988.13	2510.34	3929.35	9077.71	3246.48	5018.47	4728.11	4636.34	5892.62	5124.69	4134.37	7854.68	3907.36	4094.14	3545.98	3452.73	3970.16	2563.68	6008.63	4337.85	2866.27	3973.26	2853.25	2333.29	5762.5	3326.95	2826.52	3205.59	3381.36	3209.26	3654.79	1548.37	3454.39	3618.96	3337.19	4016.07	2853.43	3717.6	3891.8	4067.72	3761.74	3321.83	3615.43	3646.36	3592.62	2538.09	3019.42	3767.74
MA1524.3	Msgn1	5005.49	5066.38	4063.65	4198.27	4640.91	3687.49	6204.84	3253.1	4096.96	3413.59	3185.59	3579.82	3117.37	3533.51	3795.28	23244.2	2807.95	3827.55	3753.46	3289.32	4497.09	2252.81	3014.37	2606.73	2311.72	2742.4	3002.58	2938.03	2478.8	2478.48	4057.7	970.342	4130.79	3285.78	2606	4105.64	2508.29	3618.03	2629.22	3268.95	5588.68	2818.03	2747.14	2558.4	2572.37	3069.77	2580	3271.21
MA1525.3	NFATC4	1347.83	8550.79	2470.67	710.947	1862.85	1233.41	2531.72	1416.92	1238.1	1123.95	1523.79	1401.29	1683.45	1059.4	1044.86	1864.65	1475.75	1438.85	1308.16	1727.71	1560.71	1124.64	1319.21	1413.15	1122.95	1338.6	1277.21	1442.51	2009.26	1301.71	1214.86	652.07	1193.93	2002.87	3955.19	1329.01	1297.9	1163.96	1421.63	1235.09	1700.08	2116.84	1646.65	1299.05	1058.14	1385.17	2057	1994.44
MA1527.2	NFIC	4792.68	3785.05	4937.05	5979.14	4327.44	13905.3	11339.1	12753.6	13704.5	13441.5	5042.9	7235.63	5477.6	12822.9	20784.7	6809.3	5137.41	6342.8	8953.19	12291.6	9943.47	6952.33	11057.2	10750.3	9330.15	19531.4	10718.7	10095.1	10169.9	8765.35	5886.12	3848.53	6287.43	10418.4	10857.2	7407.59	10239.8	9198.86	9833.57	9176.62	7075.19	10389.8	9695.12	7691.45	17021.4	9167.33	7808.92	11134.2
MA1528.2	NFIX	10909	7475.41	11176.6	8083.09	7644.18	23440.6	19804.9	23480.4	20396.4	22513.4	6221.68	8470.01	7826.89	19761.5	28744.6	13784.1	6825.96	19982.9	16901.5	24393.2	17599.9	12247.7	21283.6	21255.1	17267.4	33443.4	22354.5	17987.9	18051.1	18735.7	11512.5	6182.72	13222.9	15619	15902.7	13713.7	21850.4	20218.9	17143.9	19902.3	15015.2	16017	17913.6	13932.3	31798.9	15141.8	14354.9	15774
MA1529.2	NHLH2	5912.12	7845.57	6595.75	12289.2	6343.42	13410.5	12357.4	15004.6	18838.4	13101.7	6267.68	15406.7	5719.84	15831.4	15037	10823.1	5860.18	8303.44	10434.8	14610.3	14049.8	11262.3	17124.5	16602.5	15706.5	18114.6	16683.8	13934.2	22149.1	19643.8	13195.7	10093.9	15958.5	25853.5	15282.1	25050.2	16933.4	19614.8	22989.5	20066.2	17117.1	23102.6	21224.9	11720.3	17540.7	13876.9	26255.3	24096
MA1530.2	NKX6-3	1674.84	1203.19	3293.11	1985.75	1080.96	979.938	910.976	900.144	730.683	965.588	1610.05	1823.54	1369.4	920.174	1055.38	1258.96	1397.68	1088.9	1490.36	891.607	909.071	1011.82	1324.24	808.367	785.796	1003.95	1208.39	978.082	1781.47	943.031	12825.5	516.521	4421.81	1365.25	1139.72	2549.08	889.569	1471.55	1046.58	1103.5	3307.11	1520.24	1190.43	1686.96	997.794	959.827	1636.79	1627.26
MA1531.2	NR1D1	28738.8	18964.3	23849	33284.1	13818.3	32495.4	29238.1	31306.5	31474.9	33764.3	24534.5	29129.3	24495.8	25033.1	34658.6	14660.5	23408	17581.7	27561	31720.5	18569.9	17735.1	25387.2	18941.7	20297.7	21196	25523.5	26553.4	21302.5	23428	46260.6	9166	40002.3	22546.7	28568.4	36565.9	20008	30619.3	20081.4	25117.4	35346.4	21524.9	20322.3	25412.6	22971.7	19283.3	24136.1	21586.2
MA1532.2	NR1D2	25203.9	19036.5	17618	59182.9	7638.77	23226.3	20994.4	22006.8	21370.7	24425.1	19225.7	22340.9	20700.5	15920.9	18075.7	8859.32	20307.9	9732.92	18477.1	22301.4	10585.9	11287	15854	9985.83	12230.2	12408.2	15843.5	16069.6	14935.1	15620.5	42440.2	6088.97	32462.8	14738.2	20375.7	30141.1	10553.3	21413.8	12580.6	16513.3	29539.9	14485	12875.6	17228.6	13678.6	11383.6	17253.5	14311.6
MA1533.2	NR1I2	22392.4	3838.69	8350.64	9943.63	5914.64	9955.28	8857.54	10487.1	7803.5	9748.44	4134.37	4937.52	4890.89	7730.77	7599.85	7471.49	5662.49	9498.58	8008.76	9787.72	7736.87	9432.53	9989.73	9654.5	9123.29	6979.86	10646.7	8790.12	10554.5	11231.7	17574.5	3586.38	17644.8	8419.34	10949.6	17412.7	12332.4	12832.4	9275.91	11053.5	20310	8302.37	10269.1	11895.3	9412.38	7661.83	14974	8611.97
MA1534.2	NR1I3	358.153	755.553	298.594	317.825	506.249	430.048	360.852	469.351	402.95	383.422	283.196	283.994	278.749	380.632	353.855	527.376	253.093	499.925	397.476	428.435	373.512	222.108	203.084	227.54	153.13	243.382	188.861	209.499	207.373	196.129	237.244	90.1672	162.023	356.151	209.469	246.92	160.414	227.924	245.446	235.476	264.315	263.684	263.268	200.27	175.421	263.043	175.088	325.452
MA1535.2	NR2C1	0	0	0	0	0	0	0	0	0	0	0	0	0	0	0	0	0	0	0	0	0	0	0	0	0	0	0	0	0	0	0	0	0	0	0	0	0	0	0	0	0	0	0	0	0	0	0	0
MA1536.2	NR2C2	0	0	0	0	0	0	0	0	0	0	0	0	0	0	0	0	0	0	0	0	0	0	0	0	0	0	0	0	0	0	0	0	0	0	0	0	0	0	0	0	0	0	0	0	0	0	0	0
MA1537.2	NR2F1	16156.7	11660.4	16002.7	14211.1	12917.5	25904.2	21623.5	24776.3	28692.4	26121.7	15121.5	27450.3	14986.7	20462.7	28994.5	18428.4	15237.2	15503.9	19086.9	24603.2	16927.6	12832.9	15823.8	14570.6	13895.8	16873.8	15781.1	15798.2	14882.5	16118.8	21116.8	6303.94	18231.5	17066.5	18720.8	20044.1	13810.2	18130	16223	16250.1	17827.5	16906.7	16164	16662.1	16999	17825.4	17751.6	16351.9
MA1538.1	NR2F1	3799.54	6905.27	4963.24	7489.46	5887.62	5480.86	4969.63	5399.09	5579.22	7290.01	2221	4183.93	1895.25	6586.07	19432.3	3388.29	2219.92	3047.98	5311.16	5284.16	3748.91	14096.8	6337.57	4512.88	5625.49	4715.54	6429.29	6225.65	6798.17	6692.57	5716.37	2742.63	5604.73	6441.36	5392.85	6172.99	5028.74	6762.5	6104.74	5981.54	6398.55	6131.03	6849.86	4721.68	6009.22	4228.28	7471.17	5628.65
MA1539.1	NR2F6	4576.4	10992.9	6857.67	6465.94	6590.24	6416.26	6580.92	6502.66	7054.91	8231.55	3151.09	5155.49	2322.5	8125.94	21469.5	4516.4	2867.13	3791.62	6492.73	6349.86	4870.6	6661.47	6567.51	5580.73	6606.06	5799.89	6557.33	7655.54	6828.26	7939.19	6755.33	2834	9104.74	6900.91	6371.23	12394.4	5777.34	7835.73	6870.54	8627.18	12344.6	6855.79	7834.26	5502.91	6576.18	4849.51	7932.04	6269.13
MA1540.3	Nr5a1	3569.42	2316.99	1959.2	1804.51	2796.08	3207.6	3387.56	2921.15	3485.67	3662.7	3842.55	4419.35	3953.61	3031.47	4697.24	2490.17	3781.29	2469.94	3066.83	3574.41	2783.53	2060.67	2472.26	2321.31	2028.29	2903.21	2306.35	17365.7	2645.35	2557.74	2186.33	1312.5	1988.32	3448.54	3956.49	2699.17	2493.71	2940.89	3342	2537.13	2655.84	3589.94	3260.59	2435.72	2634.12	2691.99	2948.25	3776.08
MA1541.2	NR6A1	2811.59	2090.52	2484.95	3187.88	2034	2602.56	2156.47	2327.26	3904.14	2365.87	3925.93	4944.99	4253.06	3023.5	3357.29	2406.9	3926.09	3035.48	3029.29	3371.98	3065.1	2640.62	2512.54	2558.83	2157.25	4120.12	2503.21	20363	2442.27	3018.51	2184.29	1214.57	2162.93	3289.61	3784.75	2556.34	2717.32	3146.69	3177.06	2426.32	2203.33	3259.96	3221.35	2479.02	2744.99	2876.68	2601.47	3227.4
MA1542.2	OSR1	1266.51	1857.43	1422.97	8489.34	989.077	2007.6	2206.26	1647.38	2747.82	2206.6	1221.91	908.034	1196.55	2478.33	1908.47	1350.16	1236.5	1576.33	1893	1710.94	1925.02	1480.72	1742.16	1632.7	2275.45	1692.81	1720.56	2413.02	1465.58	1394.4	1400.97	440.685	1451.91	1055.05	3839.39	1871.26	1557.96	1484.83	1229.2	1685.27	1439.99	1203.52	1213.32	1650.87	2085.4	1712.58	1162.36	1070.24
MA1544.2	OVOL1	231.848	401.284	863.4	307.318	180.16	199.381	192.976	173.735	101.484	167.435	171.067	174.382	137.549	136.878	168.267	146.714	147.323	143.728	203.388	182.474	802.189	472.42	251.757	327.339	237.754	193.402	248.081	239.788	300.852	236.429	441.766	238.256	245.394	373.384	187.351	292.914	549.297	232.35	445.731	253.944	264.315	458.133	361.38	364.455	252.606	346.993	730.851	325.452
MA1545.2	OVOL2	218.006	374.797	319.548	182.115	142.326	138.4	165.819	110.801	318.778	128.412	87.69	303.924	148.504	78.7515	124.963	104.087	149.841	84.3623	117.452	111.002	79.2995	139.258	162.803	289.415	175.965	117.345	161.653	161.541	42.9788	64.4808	186.114	23.8853	154.158	95.7396	61.1493	142.826	456.937	157.113	68.725	163.909	128.986	109.009	75.2193	140.73	183.841	201.48	57.6095	50.0696
MA1546.2	PAX3	508.681	280.766	747.677	392.247	246.819	296.951	263.747	296.945	297.288	280.42	300.446	347.519	315.267	329.069	266.01	384.628	323.607	406.189	504.078	269.918	544.753	319.06	439.736	327.339	431.18	367.247	457.749	439.19	485.661	403.005	660.603	149.283	399.551	423.169	343.477	818.224	427.771	730.244	378.969	438.631	661.846	385.951	505.278	380.693	425.22	279.833	641.612	242.003
MA1547.2	PITX2	4522.77	3636.72	8571.61	5267.31	3293.32	3870.97	3339.42	3394.93	2641.56	3847.38	2645.08	2529.79	2584.21	3567.26	2796.82	3914.68	2670.7	3144.84	3168.78	3264.57	2381.28	2185.82	2838.14	2628.69	2248.59	2562.04	3012.18	2300.7	3175.06	3970.94	7217.55	1368.03	3531.47	3703.21	2866.21	4246.05	2666.28	3162.18	3112.26	2488.65	5007.19	3585.52	2912.3	2486.23	3212.31	4219.88	3195.64	4057.72
MA1548.2	PLAGL2	92825.7	91031.9	69421.1	154698	56433.2	107105	121178	96576	71304.9	119137	38293.2	59611.4	51554	82804.9	133767	66553.5	51404.4	38144.3	43748.5	103574	96928.1	113178	97930.2	113323	88206.6	57592.6	106945	60713	70354.2	90016.5	58388.7	22703	64559	48258.5	78267.2	49986.7	124676	73042.1	64493.5	77062.8	62272.7	50503.7	73301.2	76716	91232.9	74707	57149.8	45317.1
MA1549.2	POU6F1	1598.71	473.462	1115.32	1368.49	430.582	573.221	531.609	518.104	517.567	495.499	593.705	560.515	630.533	453.759	515.317	497.637	589.292	515.548	498.222	430.032	376.96	708.63	469.947	403.186	361.332	475.9	494.561	513.651	463.097	441.962	1564.59	152.269	786.518	545.716	400.723	769.808	415.618	555.428	504.638	570.22	737.968	447.821	467.668	577.355	474.338	428.144	560.281	634.215
MA1550.2	PPARD	18563.4	13365.5	19881.1	15058.6	13924.5	22923	21111.3	21846.8	23725.1	23011.7	16774.7	22754.4	18063.9	19472.3	23652	16560.8	17508.8	14964.9	19951.3	21123.5	13665.9	13152	14808.4	12772.2	12498.9	14896.3	14708.8	14970.3	13860.7	15097.9	20687.3	5879.38	18775.8	15846.8	17810	18509.3	11233.9	15514.4	14532.4	14527.9	17726	15819.6	14443.7	17216	16768.8	16605.3	16911.2	15194
MA1552.2	RARB	4223.44	2613.64	5823.78	2914.71	2662.76	3750.6	4339.27	3980.84	5061.05	4126.44	2632.14	4046.92	2281.12	5453.54	4490.62	3048.27	2178.36	2307.47	4340.55	3832.35	3905.21	2922.66	4224.49	3355.22	3834.95	3246.55	4495.86	3822.72	3461.94	3678.09	3280.52	1396.7	3111.47	3471.52	4796.96	3297.1	3463.49	4323.93	3862.35	3933.83	3763.85	3254.07	4789.51	3473.15	4073.97	2789.93	4177.26	3292.07
MA1553.2	RARG	2965.58	3645.99	2783.07	2415.64	3893.25	4125.5	4386.59	4362	4264.11	3980.78	2544.45	4588.75	2012.11	4729.31	3807.66	2631.92	1945.42	1757.55	3905.01	4278.76	2807.66	2339.18	3328.23	2680.59	2881.25	2714.15	3383.5	3296.45	2830.16	2807.6	2574.92	1206.21	2326.52	3159.41	3469.9	2805.68	2600.65	3179.88	3137.79	3035.79	2949.76	2950.61	3610.53	2670.27	3074.78	2456.93	3323.28	2899.86
MA1554.2	RFX7	1347.83	1989.87	1039.6	1301.07	2125.88	1350.6	1292.81	1139.92	1608.22	1164.79	1259.29	2734.07	1287.85	1500.97	1875.06	2088.69	1356.13	1804.42	1786.92	1087.66	1694.02	1327.36	1431.66	1748.47	1308.32	1864.48	1424.46	1528.33	1201.26	1018.26	1560.5	307.524	1648.54	899.952	1049.95	1922.1	1796.15	1978.3	895.389	1724.51	1930.56	1203.52	992.568	1842.12	1427.22	1387.97	870.921	801.113
MA1555.1	RXRB	21541.1	6920.5	9383.1	4007.4	5943.47	7744.05	7488.6	8148.72	7717.54	8765.61	3084.96	5578.99	2787.49	9089.24	7734.71	4542.17	2797.88	3333.87	7744.92	8119.89	4862.55	4764.74	6700.1	4730.44	5826.98	5226.2	7091.9	6759.49	5089.77	5689.08	5417.77	2122.21	4975.52	5411.2	7387.35	6010.8	4943.67	6895.27	5896.61	6050.8	6633.26	5170.57	6756.66	5528.17	6417.6	4298.23	6261.37	4558.42
MA1556.1	RXRG	26136.5	4719.39	7588.68	4016.15	8382.83	9163.05	8530.83	9871.44	7861.41	9595.53	3616.85	4355.82	3527.58	8561.42	6717.68	5035.85	3091.26	3586.96	8603.42	9952.62	5259.05	14405.3	8192.18	5882.12	7276.34	5891.16	8673.22	8029.11	6683.21	7031.09	6812.6	2573.65	7246.98	6240.31	7825.81	8920.57	6428.72	9725.52	7157.22	7805.32	8606.11	6354.94	8028.85	6616.12	7645.54	5151.73	7625.92	5424.2
MA1557.1	SMAD5	775.133	1195.91	886.735	239.901	511.654	723.818	711.006	797.321	785.604	682.446	389.574	437.202	782.689	1202.37	695.338	509.532	729.059	1006.1	978.018	696.356	532.111	246.786	1837.83	512.964	476.851	423.746	1784.58	324.345	262.171	345.241	265.877	107.484	234.382	321.685	257.608	290.494	320.828	287.672	314.171	247.018	251.628	394.79	372.826	350.021	399.96	579.254	315.158	296.245
MA1558.2	SNAI1	8566.26	5439.19	10594.6	11755.1	8876.47	12970.4	10973.7	12715.5	21077	13080.4	9080.95	25248.1	8640.01	13332	14905.8	13491.7	9232.23	9261.11	15831.2	12323.6	13370.6	7327.8	12029	10975.8	10516.2	12019.2	11418.1	10424.5	13305.2	14604.9	8845.54	6163.02	9037.1	15077.1	11839.5	10712	10079.4	13011.6	14023.8	12965	10409.8	15653.1	13961.4	7769.03	11333.6	10244.7	12653.8	15254.5
MA1559.2	SNAI3	7907.05	4577.68	10192.7	11220.2	8202.67	12093.9	10295.2	11978.9	18829.4	12332.1	8379.43	24450.9	7865.84	12400.1	13045	12108.8	8506.95	7961.31	14818.2	11623.2	12340.8	6705.54	10880.9	9969.86	9453.73	10865.3	10225.7	9394.64	12268.3	13424.1	8115.4	5546.77	8363.84	13501.2	10673.8	9833.21	9131.45	11927.3	12657.2	11965.4	9532.27	13801.4	12520.7	7103.27	10166	9198.11	11448.5	13514.6
MA1560.2	SOHLH2	2849.65	3264.57	7423.91	1793.13	1340.39	2216.53	2417.75	2546.2	3529.84	2052.33	2719.83	3366.83	3400.98	3333.81	2678.66	1680.27	3158	2273.1	3262.64	2424.47	4870.6	2102.97	4884.09	5762.36	3712.72	3394.32	5056.04	3345.67	1872.8	3272.4	2732.4	942.277	4026.97	2640.5	2989.81	4095.96	8472.78	5788.84	2750.96	5150.45	4011.25	2574.97	3079.09	2632.38	3826.98	3763.75	2140.59	2476.36
MA1561.2	SOX12	993.14	1230.34	1185.33	972.737	1016.1	1123.64	1112.18	1306.56	798.14	1115.33	966.028	814.615	847.203	965.175	1093.12	1287.71	857.495	1960.64	1235.48	1179.49	1132.03	1108.78	1064.09	856.27	1085.34	1399.45	1093.16	1683.56	1563.35	1397.08	1116.69	540.406	1030.34	1573.96	2230	1108.72	724.294	1137.41	1665.11	1138.13	1076.29	1508.45	2091.42	1152.91	1268.64	985.012	1327.28	1735.75
MA1562.2	SOX14	543.285	829.718	844.827	871.173	650.377	736.014	689.198	804.855	583.233	617.105	549.141	505.709	443.077	670.326	637.187	752.403	522.556	1832.54	809.59	747.065	667.725	456.555	568.971	347.298	329.094	347.689	537.775	347.061	640.384	440.619	852.853	220.939	580.451	580.182	754.608	750.442	308.676	989.148	646.015	711.044	924.046	540.626	565.78	413.17	326.985	436.539	526.393	751.044
MA1563.2	SOX18	3768.39	1269.41	1369.15	1259.04	850.354	752.982	639	656.383	653.675	711.032	705.833	637.742	570.888	712.045	707.092	1295.64	614.475	1679.44	1069.98	633.269	811.383	553.507	562.258	409.173	505.059	465.034	516.968	391.233	939.087	615.254	938.752	361.863	578.878	966.97	729.888	818.224	364.578	739.095	814.882	563.294	894.443	929.524	802.885	530.445	360.665	542.876	850.588	1107.79
MA1564.2	SP9	849055	54873.3	38164.8	42797.8	892502	68042.6	99979.4	87209.8	273617	132535	621206	298071	87233.9	66646.8	68903.4	445444	98192.6	438790	70303.9	88550.6	561723	393986	413140	312573	84123.2	334942	410749	243016	186819	253439	359288	12269.9	478040	117019	160855	172573	168756	291453	144297	290856	344194	128101	169796	328784	442490	459808	176206	107466
MA1565.2	TBX18	17134.3	6785.41	9687.89	8757.26	9782.67	13085.5	12300.6	12532	14087.7	12541.3	11494.6	18903.1	10631.4	17721	10867.4	10825.1	11667.5	10607.8	13350.7	12180.2	11076.6	11253.5	11612.7	11291.2	10752.6	13088.3	10705.9	13332.2	11514	13511.4	11643.4	5806.53	13749.9	15737.7	15111.7	13648.4	10621.4	11318.8	15013.5	12413.3	11249.3	15231.8	14278.6	12970.6	11657.8	13566.3	12316	16053.6
MA1566.3	TBX3	13853.8	3079.16	5803.78	2916.46	3606.8	5283.6	5721.79	4841.99	5547.58	5324.8	3365.29	6478.31	2628.03	5254.79	4034.69	3518.15	2874.68	3405.74	3976.82	5215.48	4048.87	3807.56	4080.15	3488.95	3720.78	4728.57	3842.85	5602.2	4082.99	4437.08	5068.03	2051.75	3978.21	4932.5	4846.4	4768.94	3096.48	3717.6	4867.69	3991.54	3861.12	4666.77	4704.48	4810.09	4715.31	4782.35	4200.98	5121.7
MA1567.3	Tbx6	16838.4	7762.13	9190.71	9260.7	11582.5	12935.4	12921.5	12608.2	13511.7	12471.4	11832.4	14338	11510.3	13552.8	11283.8	12073.1	11964.6	10748.4	11467.2	12875.4	11296.2	11191.8	10847.4	10383	10265	12992.7	10062.5	13970.8	11740.7	13547.7	11915.4	5857.28	13682.3	16076.6	16170.7	13832.3	9996.72	10789.9	14960.5	11746.1	11158.3	14918.1	14618.7	13178.1	11511.8	13001	13109	16435.3
MA1568.2	TCF21	1444.72	3080.48	1152.47	1195.13	1479.11	1153.34	955.826	1048.62	1986.69	978.747	884.088	893.087	640.271	1367.84	1492.75	1451.28	761.798	1149.83	1421.13	1042.54	1064.22	729.783	741.845	936.109	768.334	980.049	704.229	891.001	478.139	894.671	1687.3	219.745	1311.91	796.553	559.451	1258.81	935.749	1044.47	722.594	1066.57	1769.86	939.836	744.017	943.614	1080.59	943.037	1050.53	968.012
MA1569.2	TFAP2E	64452	56047.3	84026	76160.7	50733	84268.8	93590.2	91424.7	68400.6	90305.1	33838.3	73971.8	39855.1	86487.5	84700.1	43146.7	43107.7	51456.3	61363.2	96101.5	89822.2	76160.1	132490	137133	127405	92476.7	146776	100826	97510.3	118372	59090.2	35033.8	77377.7	82249.9	99094.3	54925.1	145381	94960.4	114029	104159	73834.9	89278.5	124270	96165.6	121972	84881.7	105464	82931.9
MA1570.1	TFAP4	1733.67	1974.64	1332.48	820.391	3466.27	737.074	621.307	693.168	1125.28	584.435	612.393	590.409	511.243	762.671	917.426	818.821	491.076	957.669	1140.76	624.484	765.413	527.065	597.504	628.73	505.059	582.38	484.957	639.855	366.394	693.168	1120.78	157.046	646.518	704.643	526.924	704.447	580.894	655.006	557.654	667.181	957.879	1044.43	546.158	716.281	731.154	632.423	395.36	753.13
MA1571.1	TGIF2LX	3508.86	1160.15	1381.06	1202.13	1616.03	1661.33	1431.89	1577.8	4948.83	2011.49	1532.42	854.474	881.286	1957.54	2122.51	1737.76	836.089	1349.8	1612.29	1437.43	1613.57	1212.78	1807.62	1798.37	2275.45	2492.5	1752.57	2113.92	2777.51	2427.43	1538	1339.37	1786.97	2992.82	1683.56	2277.95	1774.28	2403.17	3122.08	2357.06	1943.25	3760.82	2987.52	1304.46	2276.26	1835.7	2271.62	2997.92
MA1572.1	TGIF2LY	3415.43	1010.49	1199.62	1169.74	1538.56	1353.25	1200.23	1195.32	4636.61	1565.9	1290.91	748.599	754.692	1629.41	1837.33	1281.76	736.614	1131.08	1425.95	1067.69	1415.9	981.858	1364.52	1457.06	1926.21	1988.35	1362.04	1636.87	2053.31	1882.03	1184.18	1000.2	1404.72	2186.69	1319.26	1692.13	1446.16	1898.63	2411.27	1796.08	1482.28	3093.5	2317.08	1060.89	1848.23	1480.32	1728.29	2276.08
MA1573.2	Thap11	9441.75	5027.31	16456.5	8892.97	8926.91	12370.7	12372.7	11191.7	10723.8	11892	10169.2	9594.77	5750.27	9611.91	9044.34	8815.7	6480.95	5608.53	8259.33	12088	7244.99	7851.34	8059.59	6305.26	9139.41	8298.91	7807.34	8682.85	10276.2	10110	9579.77	4492.24	9040.24	11247.5	9526.28	11704.5	6805.45	9579.47	10338.2	9192.78	10684.7	11680.2	9511.97	9769.92	7825.17	6925.87	11063.3	12352.6
MA1574.2	THRB	25897.8	20043	23255.1	21579.7	20035.6	37380.8	33219.8	36134.7	36946.1	36961.4	23771.2	35799.5	22811.2	29578.2	36770	25707.6	23382.8	22732.5	30210.7	35649.1	23094.5	19742.9	22275.5	20287	20836.4	25372.6	22471.3	24539.1	20053.9	23539.5	30547.3	8392.71	27732.6	22433.7	25206.5	26621.3	18134.1	24368	21593.4	23351.3	25207.2	22513.3	21501.3	23936.8	24831.2	24628.1	23131.9	21367.2
MA1575.2	THRB	7427.79	8884.54	4938	4670.19	5467.85	7985.86	8300.42	8279.46	8566.42	8002.85	5889.61	25094.9	6878.65	10607.5	13486.7	5711.92	7323.33	5338.26	9707.33	7935.42	7815.02	8292.03	11018.6	10223.3	12077.1	13197	11623	28402.2	10782.3	11269.4	7606.14	4344.74	8278.89	11176.6	11630.1	8983.51	11153.6	9661.34	11875.7	9684.51	8572.27	10690.3	12999.9	10628.7	12577	8700.01	10752.7	10072.3
MA1576.2	THRB	10322.4	3657.25	8101.58	6029.04	4552.64	7367.56	6659.1	7194.06	7111.03	7156.15	3756.3	4959.94	3716.25	6231.68	6976.27	4893.1	3903.43	4885.2	8020.3	7254.64	5933.67	8778.55	9122	7381.09	8015.12	10187.3	9452.67	10336.1	15862.4	12017.6	9283.21	5512.14	12091.9	12852.1	9227.03	14381.9	10375.9	10610.7	12413.7	8246.26	14072.1	12531.6	11995.8	14018.9	9354.84	8392.19	17594.6	11230.2
MA1577.2	TLX2	0	0	0	0	0	0	0	0	0	0	0	0	0	0	0	0	0	0	0	0	0	0	0	0	0	0	0	0	0	0	0	0	0	0	0	0	0	0	0	0	0	0	0	0	0	0	0	0
MA1578.2	VEZF1	0	0	0	0	0	0	0	0	0	0	0	0	0	0	0	0	0	0	0	0	0	0	0	0	0	0	0	0	0	0	0	0	0	0	0	0	0	0	0	0	0	0	0	0	0	0	0	0
MA1579.2	ZBTB26	12557.9	3516.86	3516.94	1695.07	3325.75	5061.42	3613.05	4911.12	3683.86	5363.82	3986.3	4249.95	4710.74	4829.62	7726.05	3909.72	3984.01	3124.53	3518.9	4579.02	4485.59	3590.74	3412.15	2894.15	2959.16	19309.8	3191.44	4670.82	5076.87	4086.47	2730.36	1814.09	3400.91	5807.56	4743.62	3682.01	2919.05	4034.04	5189.72	3769.92	3237.33	5781.91	4897.43	3525.47	8164.79	3327.21	4071.07	5839.36
MA1580.1	ZBTB32	951.615	966.128	1044.37	4457.43	419.772	510.649	464.129	468.465	503.837	466.913	253.007	457.131	250.753	383.914	417.574	472.854	265.685	578.038	579.681	462.374	291.914	262.651	184.622	227.54	228.351	243.382	185.66	257.457	171.915	208.219	325.189	82.4044	235.956	235.519	212.071	280.81	179.858	208.009	239.556	270.104	253.743	172.352	289.431	272.439	251.203	394.565	138.941	202.364
MA1581.2	ZBTB6	17175.8	15630.2	6721.47	5853.93	6489.35	26288.6	22267.5	25646.8	13811.9	31914.8	8735.94	13289.2	7343.64	21616.8	17689.7	8416.21	8111.57	7248.91	9955.49	25661.4	12030.5	15552.8	17594.5	14430.8	12776.9	16302.3	17695.3	32097.5	27597.8	24487.9	12304	8589.77	12172.2	23525.1	22500.3	12149.9	18061.2	14821.7	24367.9	14918.1	12272.7	24776	23824.9	19253	14574	12581.3	20017.6	22965.2
MA1583.2	ZFP57	1209.42	760.188	1569.17	858.915	704.424	3312.59	3954.56	4401.89	1687.02	3501.16	773.397	964.086	632.968	2105.67	2268.51	1149.92	731.578	1177.95	1672.22	4512.74	2985.8	3231.14	3549.78	6764.34	4635.52	2638.09	3862.05	2118.97	15252.1	3343.6	2034.99	827.03	2951.02	1533.75	1759.02	2125.44	6717.95	3810.54	3145.64	4213.17	3030.11	2193.44	3214.81	3821.37	4069.76	3061.37	2846.59	1810.85
MA1584.2	ZIC5	75416.3	64397.5	61919.1	68316.6	50718.6	58916.6	76367.3	69740.5	55955.2	64555.5	44467.5	46774.4	58864.8	54134.2	68314.5	60730.5	57321.2	67680.5	60420.6	73096.2	75163.3	66653.5	86419.9	73170.2	100109	50814.8	93340.7	70501.4	66594.6	68897.7	72903.6	17872.8	85135.9	39866	53721.6	58660.3	75445.7	75805.9	54186.7	87673.1	75907.1	43753.9	61727.3	80678.1	78176	52521.9	56477.7	37322.7
MA1585.2	ZKSCAN1	1834.02	6082.83	1831.09	16457.7	1419.66	2982.77	2150.3	2478.83	4032.49	2716.62	1799.8	1626.74	1577.55	2782.09	2666.29	1672.34	1698.62	2330.9	3439.68	2859.69	1391.76	1478.96	1317.53	1283.41	1200.86	1694.99	1181.18	1771.91	957.353	939.001	1855.01	375.597	1577.76	1064.62	1047.34	2336.05	1030.54	1739.31	985.713	1763.76	1845.98	1171.11	1090.68	1239.51	1343.02	1849.7	690.185	1070.24
MA1587.1	ZNF135	18907.7	29034.8	19882	17291.3	24874.7	22585.8	21463.5	23356.8	21166.5	23100.1	18922.4	27772.9	20995	23514.8	23310.5	22093.3	21715.6	17330.2	27902.7	22277.8	22817.6	17705.2	28376.4	22796	24150.1	24898.9	28148.3	29870	19191.1	21238.4	19464.3	6688.49	20515.5	18743.9	20261.2	21063.2	23906.6	22732.7	21793.7	22970.4	20796.3	19384.5	22045.8	20469	24478.9	21432.4	17805.9	18183.6
MA1588.1	ZNF136	1290.74	1264.77	1910.62	1141.72	1621.44	1492.18	1278.82	1340.69	1618.37	1385.31	1303.85	1206.98	1118.65	1806.13	1346.75	1338.27	1231.47	1207.63	1656.72	1453.4	1226.27	946.602	1023.81	846.29	847.585	1058.28	854.678	1249.42	3070.84	1868.6	1439.83	939.291	961.125	3100.05	2844.09	1157.13	699.989	1053.32	2106.91	900.348	1674.7	3756.4	2568.9	1400.09	924.819	940.239	4519.53	3022.95
MA1589.3	ZNF140	5261.56	14589.9	5145.64	5149.99	6383.06	6830.93	7301.39	8140.74	5327.3	6176.04	8354.99	5874.2	9963.15	6440.28	5536.72	6672.5	8263.93	10281.3	6360.99	7214.31	5511.89	4549.69	4226.17	4648.61	7276.34	4272.23	4226.97	4393.17	6416.74	5609.83	5221.42	2417.79	4887.43	6447.1	5759.74	5790.51	4574.23	4604.96	5511.75	4792.62	5493.53	7022.25	5989.75	5309.86	4034.68	4824.32	7505.06	6682.2
MA1592.2	ZNF274	2152.38	2989.77	2395.9	5428.42	1947.53	3194.34	2437.09	2608.25	1910.88	2711.18	2110.31	1842.23	2296.94	2499.42	2026.63	2618.05	2479.31	1577.89	2480.43	2594.96	2722.62	1879.1	2230.57	1860.24	2095.46	2283.88	2179.91	3071.81	2334.82	2435.49	2906.25	898.686	2570.34	2516.04	3118.61	3774	2199.62	2518.23	2656.71	2306.28	3207.73	2731.12	2581.99	2123.58	2173.82	2070.76	2512.23	2503.48
MA1593.2	ZNF317	1268.24	1931.59	2032.06	2497.07	1525.95	2927.62	2510.33	3215.88	4018.76	2790.59	2768.71	2158.61	1679.8	3965.7	3103.66	2736.01	1732.62	2280.91	2599.95	2474.78	4131.62	3012.56	3037.87	2720.5	2518.58	3642.05	2896.94	3654.87	2981.66	3594.8	2695.59	1603.3	3515.74	4227.86	3760.03	3585.18	2676	3414.44	4090.12	3716.82	3000.51	4002.4	3610.53	3168.23	3001.8	3324.42	2694.09	4274.69
MA1594.1	ZNF382	1320.15	1664.73	1196.28	1933.22	1461.1	1517.1	1509.24	1492.71	1905.51	1463.81	1168.72	1064.98	1280.54	1288.62	1726.59	1150.91	911.639	1070.15	1894.04	1425.45	1181.45	1817.41	1943.57	1375.22	2000.09	1838.41	1741.37	2235.08	2545.42	1888.75	2184.29	811.505	1820	2004.79	1654.93	2038.3	1166.65	1838.89	2063.71	1890.73	2175.84	1758.88	2027.65	1944.96	1730.35	1262.05	1793.8	1867.18
MA1596.1	ZNF460	68016.2	86604.5	70163	56437.1	104365	90693.6	110721	109424	84687	94000.5	82471.8	81584.8	102609	101685	100003	91557.2	107149	84395.2	48734	113524	111865	92941.6	129487	126449	144307	88795.5	137915	112134	106707	106718	86555.4	29052.3	107544	69694.6	88496	76353.8	126902	109751	96326.9	118520	103049	75826.2	102813	104599	118510	96326.9	89196.5	73089.1
MA1597.1	ZNF528	6557.49	7431.04	3806.48	17340.3	7586.53	6853.2	6058.36	6839.05	8867.29	9876.4	6049.18	10999.8	6434.36	9739.88	9613.48	9468.98	6888.92	7289.53	10184.5	6654.51	11019.2	7024.6	8438.9	8656.51	8737.78	10222.1	8103.43	9804.8	7845.78	8833.87	5822.72	3525.48	6034.17	10364.8	8650.67	7017.84	8975.9	7362.18	9955.31	7662.19	6070.79	9413.09	9700.02	7092.44	8305.13	8358.61	7254.28	10009.7
MA1599.2	ZNF682	35561	32082.9	89734.1	35969.4	43499.6	67417.9	72274.1	73118.2	77227.3	74175.1	43777.5	53077	44643.7	69821.2	74270	50266.3	45167.7	38145.8	47801.6	73081.8	51999.8	54374.1	84051.7	66769.1	69801.5	60526.2	86296.8	72346.5	77613.3	74259	55742.2	26872.8	54254	68986.1	68055.2	54511.1	68591.6	74438.4	76536.1	73108.2	58908.5	69743.8	76164.5	64023.2	71611	51883.8	69855.5	67906.9
MA1600.2	ZNF684	26690.2	28268.7	28232.7	33017.9	24492.7	39493.9	36755	42406.5	35348.6	38704.3	31822.9	32796.4	27994.2	39189.2	34009.1	31441.3	30278	29859.6	33090.9	41600.5	27630.7	34366.8	27072.3	24528.5	25200.5	27600	26520.6	29529.2	21192.9	25166.3	30982.9	9798.37	29544.8	27672.6	29070.6	33665.8	23622.2	28048	26427.7	28954.3	28601	25894.1	25128.2	27644.5	25458.5	27283.7	22219.2	26922.8
MA1601.2	ZNF75D	5150.83	7671.41	4320.81	5537.86	10101.6	9920.28	8443.19	8517.02	9866.01	10425.9	8400.99	8156.12	8187.19	9793.31	10504.9	23025.1	8058.69	7553.55	10844.6	8927.25	10502	7095.11	8026.02	8987.84	8009.75	9374.57	7645.68	9875.47	11056.3	11986.7	6450.6	4256.37	8623.39	11643.8	13793.7	9053.72	8122.79	8501.81	10850.7	9035.8	7673.6	12705.5	11282.9	7785.27	8138.12	9142.14	9266.1	11392.9
MA1602.2	ZSCAN29	859.914	548.289	883.402	801.129	553.09	1538.31	2251.11	1974.47	911.563	1459.73	458.576	1021.38	669.485	976.425	1107.96	548.193	784.463	596.785	906.375	2079.09	703.352	791.48	615.966	766.452	729.38	612.802	614.6	830.423	450.203	1157.97	1448.01	185.709	780.226	440.402	464.474	864.218	913.875	776.714	524.274	651.021	866.954	433.091	531.441	1006.76	792.902	791.927	376.156	427.678
MA1603.2	Dmrt1	688.623	751.58	460.988	1953.35	576.511	314.45	307.773	330.629	444.738	240.489	290.383	483.289	267.794	274.224	283.95	441.132	275.758	414	337.544	362.153	279.272	208.006	216.511	207.581	200.143	675.821	193.663	882.167	122.49	193.442	286.33	67.4761	165.169	275.73	212.071	268.707	148.262	258.904	304.354	237.784	287.575	216.545	152.074	202.074	740.978	302.22	324.195	210.709
MA1604.2	Ebf2	29254.4	24548.5	46819.8	46412.1	38175.8	59933.2	53374	48434.9	43333	73123.3	22182.7	49870.9	24593.2	45131.2	54119.4	34750.3	25099	23923	45943.9	49486.8	34753.9	42627.1	69933.1	52841.3	58604.3	59320.1	69937.9	74538.7	60726.9	66380.3	34261.4	25499.4	39544.6	67088.6	64897.6	43954.1	70861.7	56359.3	68872.3	46234	41026	68745	69126.6	50027.8	65715.5	49883	68303.5	62073.8
MA1606.2	Foxf1	3581.53	821.109	781.013	467.544	556.694	509.589	420.925	395.78	549.803	473.719	317.697	257.837	371.26	337.975	398.397	582.889	289.609	490.551	656.834	356.563	360.87	408.961	318.892	413.165	326.408	465.034	318.503	354.634	279.362	318.374	496.986	132.564	1278.88	382.958	333.068	801.278	549.297	440.359	349.516	554.06	759.114	346.178	469.303	409.561	467.321	391.766	316.288	337.97
MA1607.2	Foxl2	3238.95	601.264	829.588	590.997	879.179	456.032	376.899	396.223	411.905	443.317	274.57	211.75	366.391	285.943	332.822	533.324	275.758	442.121	531.977	389.305	296.511	357.84	214.833	305.383	263.275	358.555	216.07	287.745	219.192	210.906	419.268	96.7356	862.024	386.788	275.822	498.681	260.065	327.503	325.953	350.905	492.684	278.415	654.081	333.783	319.968	310.615	206.717	337.97
MA1608.2	Isl1	1107.33	952.222	2378.28	2107.45	1306.16	1317.72	1544.63	1244.51	1157.51	1300.46	853.9	1995.43	828.944	1466.75	1382.02	1111.26	979.634	1031.1	1395.3	1179.09	882.638	814.395	788.839	730.524	574.907	725.801	728.236	694.123	385.735	490.322	4761.25	218.551	1668.99	559.119	576.364	1200.71	802.071	951.529	526.237	911.891	1203.16	1247.71	855.211	1015.78	632.918	887.071	511.708	694.715
MA1615.2	Plagl1	40447.1	23740	25131.5	37729.2	29618.3	46844	51859.8	49128.1	45094	46019.7	25382.7	43397.6	30551.6	42461.6	57797.8	20650.9	29619.5	24526	43030.2	49215.7	36800.7	28784.1	49033.9	39977.2	34714.7	31635.4	49784.2	48187.3	78743.6	47640.5	43800.2	20857.9	47060.5	51423.6	42501.3	60282.3	54973.4	60700.9	47901.3	42164	60115.9	52504.1	49227.8	35810.4	43296.7	37651.5	67690.1	47981.3
MA1616.2	Prdm15	4557.37	9012.34	4235.56	2410.39	4880.53	5274.06	4555.7	4571.63	4964.35	7377.58	7236.58	7324.06	7284	6311.37	4587.75	6223.43	7790.48	4803.97	4780.39	4404.53	9337.8	8433.05	4978.08	5031.84	4446.13	4685.11	4540.67	5388.92	7398.8	6141.79	2826.48	2727.71	3064.28	7841.07	14873.6	3718.32	4617.98	3823.82	7031.55	3846.1	3647.55	8082.88	7176.9	9004.93	4267.64	4989.42	7628.18	7752.44
MA1618.2	Ptf1A	3489.83	2972.55	2459.71	4173.75	2830.31	3085.64	2681.5	2991.17	3830.71	3017.92	3171.22	2929.63	2775.32	3046	3093.14	7182.03	2789.06	2677.72	4150.76	2963.91	3269.67	2506.65	2722.34	2520.91	2409.77	3177.01	2640.86	4048.63	2864.54	2649.08	3251.89	1259.95	3748.55	3844.9	2968.99	4400.98	2326.01	3578.19	3414.65	3310.51	4317.85	3273.22	2976.07	2572.84	3038.29	3019.4	3406.87	3972.19
MA1619.2	Ptf1A	4206.14	8838.18	4690.84	10407.7	11380.7	7516.04	7035.99	8288.33	11456.3	7520.51	10899.4	3125.18	3274.39	10083	8692.34	5083.43	3169.33	5646.03	6414.03	7742.97	7154.19	6197.87	9456	8596.63	8920.46	12108.3	8958.11	8106.09	13237.5	10237.7	8420.14	6216.16	10921.6	15779.8	10109.1	19710	8098.48	12215	13544.7	11981.5	11985.1	14156.5	12733.3	6107.33	10386.3	8442.56	11533.2	15198.2
MA1620.2	Ptf1A	5488.22	2971.22	4205.56	5780.39	6456.92	6094.39	4841.67	5554.65	9583.05	8024.18	4023.68	4475.4	3101.54	6121.06	7218.77	6820.2	3219.7	4183.75	7869.78	5447.87	5540.62	2585.97	4645.76	4441.03	4353.44	5067.57	4207.77	5163.01	14187.3	10463.3	4133.37	5593.35	4763.16	11343.2	7340.51	6112.47	4384.65	5881.78	10059.4	5875.35	5592.91	12584.7	9059.02	2699.13	5235.96	4639.63	15526.3	11545.2
MA1623.2	Stat2	1714.64	6144.41	3117.86	1562.86	3309.53	1978.43	2314.06	1790.98	2222.49	1754.21	3911.55	2557.19	3837.97	1906.44	1693.8	3539.96	4046.97	3486.98	1962.41	1730.11	2435.3	2457.29	2420.23	2644.66	1936.95	2170.88	3066.6	1840.06	1974.88	1860.54	2131.11	780.454	1867.19	2489.23	2665.85	1985.04	1728.1	1940.68	2110.84	2103.12	2114.52	2508.68	1998.22	2899.4	1703.69	3013.8	1836.73	2789.29
MA1624.2	Stat5a	3012.29	2201.77	1902.53	1552.35	2949.21	2516.13	2639.94	2173.02	1980.13	2433.48	2863.58	2800.08	2847.14	2851.46	1945.59	3938.47	3297.77	2348.09	3658.57	2123.01	3476.54	2406.17	1483.69	1443.09	1380.85	1712.37	1336.43	2553.11	2764.61	2783.42	1229.17	1049.76	1344.95	2931.55	4587.5	3130.07	1604.14	1487.04	2768.64	1544.44	1465.36	3329.2	2616.32	5504.72	1526.86	1874.88	2786.72	3279.56
MA1625.2	Stat5b	4588.51	3363.24	3300.73	67842.1	4939.98	5556.69	4935.07	4860.16	3861.76	9536.54	4230.69	4467.93	4473.38	5431.51	4070.57	5154.8	4470.05	4166.56	4299.39	4520.72	6076.18	5295.33	3685.73	3510.91	3359.45	4337.42	3293.87	4157.16	7345.08	6470.91	2828.53	3364.85	3910.57	8074.68	10084.4	5824.4	3772.16	4102.64	7033.51	4051.56	3679.27	8676.54	6573.51	3444.28	3696.47	4214.28	7454.22	8705.85
MA1627.2	Wt1	149516	234522	174631	129521	225805	199398	115232	113903	210868	195309	243773	214286	270080	220139	191485	227227	282099	207458	55685	113925	229459	143034	160638	184801	200373	151299	164164	155449	125823	142059	150853	42772.1	164058	111738	137647	138369	133875	153603	127766	168947	151759	116348	130823	150533	165783	203769	115520	108303
MA1628.2	Zic1::Zic2	8711.6	20411.9	12562.4	18179.1	9888.97	23998.4	26968.4	25198.7	34529.5	25221.9	13875.2	11900.4	11052.6	27560.7	29606.3	15186.8	12537.6	18892.5	20519.8	26399.6	22102.7	23354.8	40801.5	33987.3	28918.6	28664.8	41403.8	29947	41377.9	34827.7	23184.5	13714.4	25678.3	33420.8	25678.8	28163.4	40912.9	36065.2	35568.1	37807.7	27918	32062	33426.8	27267.4	30580.8	26707.3	30562.4	32789.3
MA1629.2	Zic2	8877.7	13574.8	12070.5	17448	13978.6	24073.7	21930.5	23811.5	31272.5	24859.8	13075.9	11836.8	11299.7	26116.9	27074.3	11750	11994.9	13382.4	17417.3	23449.7	18460.7	18405	30504.6	24137.2	22076.2	23949.3	29894.5	28293.7	32305	26212.8	18883.4	12483.7	21646.6	33577.8	24334.8	28584.6	26738.1	27583.3	30576.7	29609.9	22767.1	30874.6	28787.7	20243.5	24192.6	22165.6	23993.8	32866.5
MA1630.3	ZNF281	164199	181830	123957	125360	196100	189125	122871	127571	173972	177356	204545	323673	221821	214074	201915	397906	242041	393977	36445	120952	179385	769649	418493	742434	153526	720347	411481	295554	511056	643788	762375	36285.4	440582	461158	536422	570854	521470	699447	522118	712494	749896	465238	532654	740905	416125	898507	512854	444931
MA1631.2	ASCL1	15334.8	12817.3	14952.6	30857	9802.49	26971.1	24503	28431	42123.5	29353.8	14740.6	30072.3	13627.1	30149.6	27412.6	21167.4	14698.3	18370.7	24836.4	28332.2	28320.3	19385.1	29249.2	30516.4	26645.9	27752.1	28775.7	22969.2	30434.4	28402.4	18509.2	11761.7	20960.7	30544.8	25581.2	22455.2	29997.4	29402.3	30349	27940.8	22509.1	29451.6	29577.5	21463.2	27350.2	24899.5	23644.8	30592.5
MA1632.2	ATF2	18707	823.758	1120.09	3760.49	1270.13	1039.33	1149.62	898.371	801.722	986.46	1165.85	1269.26	1039.53	1136.74	694.719	753.394	1031.26	770.197	729.509	871.643	635.545	1089.39	892.899	590.807	647.442	562.822	1070.75	937.697	1224.9	1102.89	1437.78	406.648	1379.55	1049.31	1874.81	3587.6	916.305	1467.13	1129.05	1242.02	1807.92	1281.59	1218.23	950.831	764.835	663.204	1443.63	1028.51
MA1633.2	BACH1	441.203	1005.86	643.383	813.387	632.361	874.414	682.615	803.526	675.762	952.883	421.2	822.089	359.087	670.326	626.67	500.611	324.866	671.774	661.656	740.677	425.229	458.318	469.947	510.968	474.164	551.957	448.146	593.159	488.884	514.503	529.71	244.228	495.507	559.119	636.213	556.779	503.117	646.155	571.399	685.649	501.142	581.873	647.54	510.598	534.683	456.128	493.635	655.077
MA1634.2	BATF	489.649	788	620.048	832.649	637.765	1041.98	791.241	996.319	914.548	1109.88	323.447	367.449	995.707	787.515	804.217	547.202	292.127	729.578	771.53	857.668	473.498	611.678	483.374	532.923	494.313	643.225	468.952	641.117	581.288	603.164	558.343	282.444	498.653	674.007	685.652	573.725	486.103	551.002	624.416	706.427	575.15	679.098	760.369	535.857	613.271	450.531	528.652	684.284
MA1635.2	BHLHE22	0	0	0	0	0	0	0	0	0	0	0	0	0	0	0	0	0	0	0	0	0	0	0	0	0	0	0	0	0	0	0	0	0	0	0	0	0	0	0	0	0	0	0	0	0	0	0	0
MA1636.2	CEBPG	529.444	762.175	549.566	1220.52	549.487	484.136	365.378	382.927	493.689	525.9	692.895	700.021	623.23	741.108	510.987	748.438	664.842	598.348	502.011	390.902	635.545	371.942	454.841	423.145	335.81	397.67	393.728	400.067	328.788	291.507	517.438	235.271	435.731	526.568	322.66	774.65	349.995	449.211	365.224	461.717	526.516	408.048	376.097	411.365	384.522	503.699	257.548	494.437
MA1637.2	EBF3	26115.8	23655.9	49758.6	48039.7	37148.9	60131.5	54238.5	49077.6	44386	73506.3	21290	51695.7	23592.7	45931.8	55520	34687.9	24200	23310.6	47044.9	50107.3	34866.5	44553.8	72955.9	54619.7	59817.2	58455.3	73084.5	74365.8	59801.8	66628.8	35222.6	25278.5	39917.4	66136.9	65380.3	43600.7	74867.2	58215.9	69088.3	47739.2	41603.2	68341.4	69775.7	51965.5	66550.5	49955.8	68040.3	60951.4
MA1638.2	HAND2	0	0	0	0	0	0	0	0	0	0	0	0	0	0	0	0	0	0	0	0	0	0	0	0	0	0	0	0	0	0	0	0	0	0	0	0	0	0	0	0	0	0	0	0	0	0	0	0
MA1639.2	MEIS1	1885.93	882.693	1650.13	899.191	774.687	930.623	902.336	710.01	645.317	820.84	889.838	752.336	696.264	663.294	712.66	819.812	696.321	590.536	780.658	659.222	663.128	983.62	699.885	473.045	578.937	1432.05	659.414	788.776	899.332	1012.89	1317.12	438.893	1013.04	1145.05	698.663	919.896	490.965	858.589	1237.05	817.239	1034	1035.59	989.298	858.815	875.701	556.868	874.309	1124.48
MA1640.2	MEIS2	1090.03	837.664	1678.22	696.063	457.606	460.804	480.587	443.202	416.68	399.757	487.327	312.643	320.136	427.977	377.982	669.133	327.384	428.061	368.027	476.349	362.019	377.231	459.877	345.303	329.094	1162.59	515.367	401.329	1030.42	452.709	1405.06	294.984	1159.33	762.087	429.346	886.005	306.245	466.913	677.432	401.694	1291.97	838.192	631.188	344.609	592.221	402.959	1483.16	1051.46
MA1641.2	MYF5	4003.7	8636.22	4532.73	10121.4	11105	7192.57	6740.57	7907.62	10914.9	7234.65	10591.8	2877.31	3033.38	9604.87	8245.08	4825.69	2898.61	5433.56	6022.07	7468.26	6911.7	5859.42	9147.18	8319.2	8669.28	11599.8	8681.22	7751.46	12829.2	9903.17	8066.31	6013.14	10476.4	15245.6	9770.87	19201.6	7899.18	11816.7	13061.7	11556.8	11545.3	13552.5	12234.6	5878.19	9975.13	8064.79	11194.3	14695.4
MA1642.2	NEUROG2	6275.47	4477.69	2443.52	5374.13	3104.15	4508.35	3766.52	4077.02	5519.52	4279.35	4092.68	4248.7	4274.97	5374.79	4493.71	25622.3	3749.81	3905.66	4873.04	3851.52	4776.36	3856.92	3494.39	3488.95	3179.45	3937.58	3308.27	4675.86	2814.04	3155.53	4548.55	1408.04	4737.99	4160.84	3891.44	5054.59	3145.09	4370.4	3720.97	4838.79	5072.74	3392.54	3471.54	3550.73	3511.22	4133.13	3042.01	4295.55
MA1643.2	NFIB	18530.5	6080.18	17790.4	9146.01	7413.57	23060.4	20690.8	22216.8	23476.2	22289.3	8155.17	11803.2	9280.28	22324.7	56925.5	10354.2	7828.26	8867.42	17617.7	20911.4	16605.8	13532.7	21453.1	21147.3	18681.8	35531.7	21640.6	18583.6	25459.6	20326.2	9755.66	8447.05	11495.8	22458.6	19911.2	12980.2	23072.9	17886.5	21656.2	17060.4	12340.4	24942.5	21198.8	16137.1	32626.9	17075.4	18107.5	22698.2
MA1644.2	NFYC	3138.6	2637.48	2505.91	2595.13	2010.58	2596.73	2090.23	2446.92	3175.25	2289.64	4723.76	2447.58	5694.27	1996.91	3260.79	1718.93	7762.78	2802.7	3137.1	2343.01	1287.18	957.179	800.588	780.423	616.548	801.858	737.84	766.059	1036.86	921.538	1638.21	349.92	1068.09	1478.22	1044.74	1278.17	724.294	958.168	1024.98	1004.23	1427.3	1227.09	1022	1057.28	757.818	873.079	1017.77	1197.5
MA1645.2	NKX2-2	6118.02	5309.4	6377.63	9152.13	6201.1	13279.5	12494.9	12882.6	11992.4	12973.3	8570.62	8468.76	7763.59	9946.6	10881.1	7287.11	7979.36	7205.17	12122.5	12339.6	7454.15	5286.52	4501.42	4339.23	5338.04	6171.48	4326.21	5852.09	5299.29	5742.82	6790.1	2279.26	6775.07	6807.08	6139.65	7872.38	4365.21	6583.26	6422.84	6969.61	6635.37	6268.03	6001.19	5437.96	5452.08	5101.36	5152.1	6682.2
MA1646.2	OSR2	2565.9	2391.81	2228.74	7609.41	2933	4196.55	3731.55	3429.94	5840.69	3624.13	5032.83	2808.8	3590.87	7453.27	4648.99	3622.24	7645.68	3610.4	4674.99	3547.26	5028.05	3532.57	3915.66	3081.77	3012.89	3707.24	3605.97	3678.85	3234.16	3289.86	2372.45	1446.26	2773.26	4197.22	3326.78	3190.59	3162.1	3297.16	3750.42	3589.85	2903.24	3312.99	3546.75	3013.07	3349.84	3411.16	2799.15	3786.51
MA1647.3	Prdm4	4263.23	3221.53	2624.96	1737.09	2990.65	3911.8	3441.05	3270.39	2736.48	6666.09	2232.5	2242.06	2365.11	2917.09	3014.57	3308.99	2481.82	2418.39	3310.69	3152.37	3082.34	2111.79	2517.57	2698.55	2313.06	3805.02	2389.58	2965.8	3113.82	2729.69	2045.21	1491.64	1577.76	3410.24	3009.32	2147.23	2454.82	2000.42	2813.8	1796.08	2196.99	4136.46	3057.83	2556.6	2585	3268.45	3336.84	4055.64
MA1648.2	TCF12	7303.21	4453.19	10210.3	8972.65	6352.43	14239.9	13926.7	14363.7	18846.1	14385.8	9454.71	24678.9	9709.97	15451.7	14479	17530.3	10672.7	11121.8	13925.9	14099.2	17684.9	11487.9	16287	18311	15930.8	14400.9	16242.1	12288.5	13022.6	13390.5	9354.8	5126.39	10976.7	12524.7	11514.3	10910.5	16872.7	15374.9	14328.2	15631.4	11517.8	12488.9	14514.1	12043.3	15052.5	13451.6	10925.5	12682.2
MA1649.2	ZBTB12	1638.51	2487.17	2287.8	1612.76	6064.18	3611.66	3011.08	3634.26	1934.76	4174.08	1329.73	7168.36	1396.18	2615.21	3252.13	1600.96	1285.61	1982.52	7506.75	3363.19	2357.15	1512.45	1376.27	1111.75	1057.13	1482.03	1320.43	1789.57	2678.65	3124.63	1435.74	1227.11	1444.05	2929.63	2685.36	1634.03	1193.38	2029.19	2823.62	1793.77	1571.09	4061.33	2627.77	1492.1	1279.87	1124.93	3349.26	3083.45
MA1650.2	ZBTB14	12018	5981.52	13168.2	10391.9	13176.9	14458.9	18644.2	17858.4	11204.4	14890.8	11214.3	13058.8	17063.3	14497.3	15963.1	14366	14586.2	21432.7	13947.5	16923.8	18517	15773.2	21031.8	24205.1	23032.6	12523.3	22589.7	15694.7	23020.5	22518.6	16116.3	5584.99	19376.7	9686.93	13413.8	13232	32248.1	23146.5	18212.1	26996.6	20813.2	11339.9	20476	19882.7	20117.3	14103.6	18339	10604.3
MA1651.2	ZFP42	3119.57	12123.3	2624.01	3971.5	3585.18	4857.27	11971.5	4913.34	5771.44	4459.94	2704.02	2780.15	2737.59	3661.95	3318.94	3936.48	3093.78	5258.59	3919.3	5364.82	6472.68	2804.55	4269.8	3197.54	3362.13	2851.05	4287.79	4030.96	3806.85	2819.69	5444.35	1039.61	4396.64	2879.85	3011.93	4795.57	3801.33	4107.07	2843.25	4247.79	7094.22	3703.37	2974.43	3419.02	3519.64	2742.36	3841.77	3531.99
MA1652.2	ZKSCAN5	54091.5	41959.4	68164.8	41577.3	59800.4	68300.3	68885.7	69149.8	74378.6	68453.7	73422.4	63270.9	69694.6	78921.2	56561.8	56881.3	72187	60659.7	69869.4	64276	63108.6	52137.2	57764.9	58713.4	59421	57720.8	56711.2	60718.1	44265	47882.3	56486.7	18305.7	59743.9	51297.3	50791.6	64438.7	51074.9	58970.5	53106.8	61576.9	60293.5	47071.3	50967.6	54724.2	53173.6	67036.8	44923	52132.9
MA1653.2	ZNF148	394214	330017	146984	269361	403551	133509	179554	164464	249020	129213	388546	493931	443670	163957	147646	311937	439601	614764	65254.9	193448	382465	611213	672991	593078	450449	552891	684502	493942	412511	494623	532438	107120	662602	312161	389128	363369	450492	516068	394866	537658	560454	322427	413539	559837	687515	691299	383342	313759
MA1654.2	ZNF16	13224	21685.2	24664.8	30126	21246.2	26893.7	25496.6	27211.3	27843	26746.1	18304.2	24641.5	21630.5	28785.1	33986.2	17463.9	18808.2	18389.4	33551.6	27771.6	20112.2	24063.4	26157.6	22600.3	23697.5	24131.8	26720.7	28531	24727.9	25232.1	28434.6	9705.21	26881.6	26315	29563.7	24212.6	25340.6	23339	27134.6	24235.5	24816	25178.2	25751.2	26969.7	25045.9	21583.5	24059.3	26017.4
MA1655.2	ZNF341	3129.95	3370.52	2780.69	34792.6	6914.53	5126.64	4876.23	5301.59	4569.16	4849.27	3624.04	3533.74	2817.92	4678.68	5727.88	3766.97	3387.17	4050.95	4527.74	5539.3	4198.28	4565.55	4543.38	4441.03	4212.4	8681.37	4462.25	4895.46	4724.45	5318.32	7718.63	2212.38	8116.87	6364.77	6074.59	14638.5	4639.86	7337.84	5753.27	6092.35	7988.67	5790.74	6282.45	5636.43	4915.99	4670.41	5454.83	6154.39
MA1656.2	ZNF449	29711.1	22286.5	23281.3	24210.7	24114.4	45942	41961.7	47755.5	41710.4	50589.9	30037.4	29490.6	29422	37801.7	35853.2	28802.5	28501.3	22987.2	27886.2	45975.5	30996.9	34601.2	37285.3	27444.6	32893.3	40716.6	36984.8	34579.9	44940.8	39818.2	46827.2	17785.6	46874.9	47004.3	40899.8	50347.4	28099.2	51486.6	43288.9	52698	49048.5	45990.1	41393.5	42558.3	37799.7	26791.2	39816.1	47599.5
MA1657.2	ZNF652	1526.04	1111.81	5607.1	2793.88	1661.07	1472.56	1237.68	1330.49	1246.46	1541.85	928.652	858.211	797.296	1364.56	1316.44	1500.84	848.681	1223.25	1117	1310.46	1063.07	1225.12	995.28	993.992	830.123	1034.38	1083.55	941.483	988.513	831.533	1550.27	532.046	1272.59	1526.09	4055.37	1338.69	943.041	1028.98	1129.05	1029.63	1053.03	1605.68	1231.31	1057.28	1216.72	1276.04	1535.12	1510.43
MA1683.2	FOXA3	3581.53	821.109	781.013	467.544	556.694	509.589	420.925	395.78	549.803	473.719	317.697	257.837	371.26	337.975	398.397	582.889	289.609	490.551	656.834	356.563	360.87	408.961	318.892	413.165	326.408	465.034	318.503	354.634	279.362	318.374	496.986	132.564	1278.88	382.958	333.068	801.278	549.297	440.359	349.516	554.06	759.114	346.178	469.303	409.561	467.321	391.766	316.288	337.97
MA1684.1	Foxn1	0	0	0	0	0	0	0	0	0	0	0	0	0	0	0	0	0	0	0	0	0	0	0	0	0	0	0	0	0	0	0	0	0	0	0	0	0	0	0	0	0	0	0	0	0	0	0	0
MA1707.2	DMRTA1	941.234	577.425	726.246	3271.93	437.788	274.68	290.903	308.469	274.603	261.362	227.132	215.487	216.67	221.254	241.265	302.349	226.651	292.144	294.318	293.875	210.316	200.955	114.13	169.657	146.413	158.633	120.039	135.038	85.9576	122.245	190.205	73.4474	125.843	149.354	105.385	150.088	82.6376	183.667	125.669	145.441	156.475	388.898	132.451	144.339	133.32	193.085	132.163	173.157
MA1708.2	ETV7	15051.1	4612.78	6335.25	5248.05	8323.38	10216.2	9531.92	11236.1	9796.17	9053.29	7725.35	6789.71	6827.53	10044.6	8765.34	8431.08	7324.59	8504.97	7270.64	9837.63	8990.72	8410.13	5258.37	7311.23	5429.38	5830.31	5227.3	5030.5	5213.33	5444.59	7377.08	2079.82	6962.26	6148.4	5816.99	7470.53	6076.29	7366.61	5755.23	7666.81	7345.85	5599.24	5562.96	6796.55	6858.25	7124.55	4642.65	5094.58
MA1709.2	ZIM3	1524.31	2999.7	1734.42	1585.62	1850.24	1669.29	1457.81	1526.83	2019.53	1517.35	1911.93	1289.18	1376.7	1431.12	2374.29	2964.01	1529.89	2048.13	1639.85	1503.71	2006.62	1990.16	1634.74	1682.6	1834.87	2514.23	1571.71	1880.44	1665.43	1835.02	1846.83	751.791	1429.89	2454.76	1968.49	2055.24	1169.08	1666.28	1967.5	1542.13	2260.42	2474.8	2236.96	2401.43	1980.15	2087.55	1678.58	2572.32
MA1710.2	ZNF257	40921.2	43804.2	57774.5	32653.7	71779.2	65369.5	62153.3	67240	68400.6	62335.3	81784.6	84128.3	75133.3	82828.8	69261.6	67587.4	82165.9	61200.2	64314.9	66021.7	65031.3	64531.1	66730.8	68950.7	67076.1	61936.5	64813.1	67044.7	52928.4	50202.3	49751.8	18263.3	53750.7	51377.7	50210.1	58820.1	69384	56691.2	55286.3	60935.1	57056.2	49182.3	52683	59929.4	62580.3	73624.1	40266.8	50645.4
MA1711.2	ZNF343	14459.4	8034.95	6751.95	9273.84	10791.6	18926.4	17878.4	19780.1	16788.4	17253.5	11690.1	12407.3	13053.7	18930.8	15856.7	11709.3	14579.9	11984.1	12312.3	19164.6	16582.8	22549.2	17607.9	21444.7	19186.9	16341.4	17698.5	16874.8	14141.1	14290.6	12105.6	4586.58	14372.8	11963.6	13987.6	13919.5	21728.8	17773.7	15688.9	17905.4	15258.4	11995.4	14831.3	17661.6	17643.1	17912.1	11314.1	12191.9
MA1712.2	ZNF454	29083.1	27813.1	105033	56390.7	28310.3	74323.6	81841.8	80894.2	53547	82363.1	24308.8	34337.2	27727.6	77960.7	80802.1	28743	28233.1	33035.7	53371.8	82107.3	62825.9	82030.1	113705	128437	108338	83165.1	128203	87583.2	108725	115398	57415.2	32709.2	72213.4	73034	83836.9	54249.7	156141	97943.4	110219	96828.9	75274.9	80238.1	112466	93576.6	107497	69143.9	105697	77292.8
MA1713.2	ZNF610	17520.1	18084.9	39529.2	27052.8	28205.8	40614.4	63395.1	58491.2	30956.1	42727.3	26942.4	31271.8	32453	40514.4	42811.5	42689.7	35196.3	44648	35622.6	61552.8	52552.6	58086.5	71084.5	84928.4	96631.4	53876.6	81091.9	51983.5	84321.2	79151.5	61084.3	20489.4	71782.4	35557.7	56353.6	41995.7	110418	82179	75976.5	98292.6	80622.5	44396.2	80174	81363.7	91332.5	41244.6	72509	47691.3
MA1714.2	ZNF675	19108.4	28038.9	22321.2	40300.7	20637.3	17201.4	24820.6	16002.3	17070.2	15923.6	19054.6	16028.2	20752.8	18334.1	16017.5	21074.2	20885.9	20226.7	17450	15785.4	16998.8	19207	17701.9	16516.6	14466.7	14535.6	17900.2	17149.9	17895.3	15698.4	25102.9	6640.72	22838.9	20593.6	23990	22687.5	15927.2	19103.6	15498.5	16513.3	21274.2	21561.7	15967.8	18747.8	14277.9	20814	25243.1	19495.8
MA1715.1	ZNF707	50620.7	53198.6	44272.5	33812	36999.4	64677	62464.4	63776.8	57467.3	71915	36059.3	52794.3	39957.3	60244	55749.5	38322	39699.1	33445	58460.3	63314.9	41593.2	39600.4	39232.2	34053.2	52253.4	39938.6	38715	44306.5	46870.6	44506.5	35623.5	17533.6	35983.2	42931.5	46660.8	37756.9	33164.4	39723	44035.1	40550.3	39175.8	41931.7	41488.4	44281.3	41949.4	35208.6	43472.6	41799.8
MA1716.2	ZNF76	17475.1	31110.8	18860.5	68868.2	17738.5	32024	29286.6	31311.8	35416	32053.6	23636.1	22524	23199.5	27091	30790.4	18071.5	22536.6	19042.5	29099.3	30580.6	23693.3	33453.7	28708.7	25207.1	26726.5	25989.8	28767.7	29822	32128.8	33493.7	39413.3	11198	41757.8	32394.4	27806	39342.5	27464.8	38959.6	29797.2	37080.5	41305.1	32001.6	30601.2	30085.6	28748	23606.7	34711.4	31235.1
MA1717.2	ZNF784	2640.3	3132.8	3783.15	8198.66	3050.1	3315.24	2762.14	3141.86	4591.24	2981.62	3408.41	3042.97	2760.71	3951.17	4597.64	2719.16	3006.9	2741.78	4774.01	3045.76	2129.59	2025.41	2009.02	2051.86	2262.02	2112.21	2037.46	2058.39	1074.47	1445.44	2059.53	809.116	1791.69	1616.08	1743.4	1987.46	1784	2263.76	1494.28	2006.16	1774.08	1585.05	1545.27	2125.39	1888.93	2851.5	1193.99	1474.97
MA1718.1	ZNF8	188.593	502.598	2829.27	1084.81	290.057	242.333	208.2	220.715	290.124	215.987	204.131	164.418	185.021	215.16	196.105	292.436	161.174	234.34	377.671	204.435	211.465	142.784	156.089	143.71	139.697	199.921	158.452	223.381	159.022	165.232	224.973	60.3105	169.888	214.457	186.05	198.504	121.526	212.435	204.212	163.909	192.422	213.599	191.319	173.206	141.74	201.48	177.347	237.831
MA1719.2	ZNF816	47733	52304	91652.3	72669.9	61162.4	86505.5	91519.4	89708.1	90319.3	87773.2	56686.6	60129.6	63276.1	79594.4	99068.3	65071.5	64706.2	75038.7	43310.6	86190.4	71604	77159.6	113457	90263.7	103227	88080.6	115425	115166	134142	114377	97221.2	45135.5	111587	111087	102870	113239	109893	110017	108633	94183.3	114076	113367	111709	103222	108170	88141.8	150330	101948
MA1720.2	ZNF85	958.536	2004.43	1014.36	1036.65	1107.98	1470.44	1225.74	1430.21	1358.09	1391.66	1119.85	1211.96	1107.69	1585.34	1386.96	1619.8	1196.21	1187.32	1497.42	1296.08	1405.55	1091.15	1025.49	962.057	1218.32	1143.03	931.503	1143.41	1337.72	1378.28	1014.42	790.008	939.103	2481.57	1383.01	1997.14	989.221	1124.13	1637.62	1228.17	1630.3	2162.51	1605.77	1053.67	966.92	1175.3	1295.65	2478.44
MA1721.2	ZNF93	18054.7	30756.5	24870	24824.5	35059.1	47900.3	66791.8	56060.7	56537.8	50562.7	32048.6	38957	43850.1	46680.9	62396.1	56620.6	73699.2	56561.8	46287.7	59891.4	71193.7	82356.2	110582	132077	134903	72291.1	126873	76573.1	115636	113355	71251.1	26904.5	89181.8	49449.5	67987.6	49662.3	156798	102086	104411	122295	98006	62150	113717	110033	134462	58893.7	96246.3	67339.4
MA1722.2	ZSCAN31	1960.33	1961.39	2866.89	22686.4	1527.75	3779.76	3362.46	3606.78	3758.48	3603.26	2440.95	2006.64	1556.86	3679.76	3591.75	2114.46	1891.27	2073.13	2956.1	3603.56	2260.61	2321.56	2955.63	3065.81	2374.85	3077.05	2976.97	2594.76	3781.06	2182.94	4712.17	1045.58	3813.04	2774.53	3286.45	3933.77	3429.46	4166.81	2517.3	3416.7	6159.6	3044.89	2410.29	2711.76	2229.95	3011	2184.64	3087.62
MA1723.2	PRDM9	433592	169807	160365	325651	487451	186209	111853	212650	193904	179907	552253	433796	363302	218693	187642	377110	368574	382505	56783.9	118813	420482	416988	497075	362839	575909	354152	504145	383652	278115	367059	489458	7453.42	588332	264440	310434	345080	289676	366565	281782	379850	460040	265537	279188	429500	450136	465172	318370	249161
MA1724.2	Rfx6	3918.92	4846.53	2915.94	5276.07	4278.79	5750.24	4423.62	4519.33	5391.77	5236.32	4557.01	6031.14	3207.44	4807.12	5790.36	4604.63	3112.67	3557.28	5739.46	4268.38	3905.21	4198.9	3237.6	3642.64	3492.43	3874.56	3164.23	3175.3	2314.41	2469.08	2969.65	924.96	2946.3	2694.11	3726.2	3563.39	3312.8	3799.48	2517.3	3358.99	3359.98	3806.48	2568.9	3330.61	3340.01	4085.56	1930.48	2576.5
MA1725.2	ZNF189	5484.76	9401.7	8023.48	11272.7	7231.61	13964.1	12193.3	13806.2	14571.3	13412.5	8994.7	8609.51	8444.03	13733.7	14230.3	10054.8	9234.75	10648.4	19866.4	13886	11597.3	12515.6	13997.7	12927.9	11310.1	14183.5	13341.9	13965.8	17525.7	17710.7	11385.7	8611.86	11481.6	21932	18199.1	15098.4	13640.1	14554	20387.8	14327.1	12915.5	19598.1	19045.2	12961.6	12453.5	13574.7	15755.6	21876.2
MA1726.2	ZNF331	14808.9	8137.59	8201.59	13359.2	5073.3	20398.4	18413.7	20266.8	17790.1	20736.5	7890.67	11930.3	10890.7	25358.9	21541.9	9709.86	8848.19	7492.63	11025.8	19258.4	13817.7	20594.3	27419.7	24261	20707.4	23423.4	27765.8	21309.6	28710.9	27373.4	17846.5	11860.3	20809.7	31316.4	30227.3	22525.4	28823.5	25731.1	29913.1	27956.9	23464.9	27770.8	30148.2	20719.8	22790.7	17858.9	23120.6	32015.3
MA1727.2	ZNF417	7780.75	7205.23	6195.24	7649.69	5981.3	6969.86	7121.99	6311.2	8011.25	7011.4	2946.96	2778.91	2660.9	10300.5	6733.15	8291.3	2702.18	7233.29	6519.77	6061.97	7402.44	7255.52	11047.1	9969.86	7742.44	8057.7	10547.4	11430.3	8716.1	8832.52	5534.34	3748.8	6586.31	10362.9	7120.64	7364.01	14087.3	8154.39	9089.37	8153.92	7775.1	9279.04	8471.98	8618.82	9255.21	7236.48	9676.14	10059.8
MA1728.2	ZNF549	17776.2	39219.2	21203.5	21613	13946.2	41317.5	47239.5	45277.5	52888	40733.9	18389	23484.3	24723.5	44583.7	40846.8	24391.1	23003.8	27542.7	31195.6	47272	38686.7	43200	65007.1	58172.5	52013	58144.5	65186	46993.4	60810.7	50381	52015.9	20902.1	55806.6	54701.8	46085.7	63954.6	76767.9	69634.3	56014.8	70871.2	63638.7	51682.1	54442.4	46787.4	64380.9	41597.2	45839.1	56995.9
MA1729.2	ZNF680	1335.72	2969.9	1785.85	1063.79	2212.36	1451.88	1218.34	1236.09	1968.19	1277.32	1878.87	1619.27	2036.45	1593.31	1546.57	2569.47	2224.95	2010.64	1851.16	1209.44	2183.61	1796.25	1685.1	1439.09	1382.2	1503.76	2271.14	1673.47	1267.88	1358.13	1145.32	548.766	1031.91	1788.42	3131.62	1365.32	1237.13	1245.84	1641.55	1242.02	1264.48	1881.14	1492.94	1333.33	1397.75	1614.64	1489.94	1662.73
MA1730.2	ZNF708	4135.2	5195.5	10339.8	10524.1	2673.57	8265.31	7982.36	7895.65	10150.8	8225.19	3060.53	2768.94	2614.64	9030.17	8748.02	5392.72	2710.99	4436.83	6456.05	7696.25	6566.92	7960.63	11161.2	9209.4	8733.75	10706.7	10829.1	9270.96	13106.4	11777.1	8283.11	6298.57	9306.09	16509.3	11263.2	9697.64	8331.81	11321	14182.9	12588.7	9217.2	14253.7	13655.6	8829.92	9739.37	8073.18	12177.1	15496.5
MA1731.2	ZNF768	20561.8	14793.9	29322.7	25609	17360.2	21839.7	19284.4	20052.2	19691.4	20086.3	28651.6	30149.5	29108	23504	19070.4	20189	29958.2	20621.9	19312.9	18980.5	19350.2	14149.7	17005.4	18235.2	15942.9	27480.5	16933.5	23727.6	16805.8	18586.6	13310.2	8269.7	15615.5	21932	23958.8	16538.8	16260.2	17952.9	20556.6	18027.7	15055.4	20611.6	19360.8	14957.1	24640.3	20517.4	17838.6	22178.7
MA1928.2	BNC2	489.649	788	620.048	832.649	637.765	1041.98	791.241	996.319	914.548	1109.88	323.447	367.449	995.707	787.515	804.217	547.202	292.127	729.578	771.53	857.668	473.498	611.678	483.374	532.923	494.313	643.225	468.952	641.117	581.288	603.164	558.343	282.444	498.653	674.007	685.652	573.725	486.103	551.002	624.416	706.427	575.15	679.098	760.369	535.857	613.271	450.531	528.652	684.284
MA1929.2	CTCF	10905.5	5922.58	6142.38	5889.83	4442.74	10444.2	10896.7	11864.5	11071.3	12107.5	4613.07	5013.5	4868.98	11378.7	11382.8	6814.25	5269.63	9773.53	8740.85	11881.6	10360.7	9173.41	14841.9	12822.1	12461.2	10463.3	15694.7	13545.5	18404.6	11309.7	8227.89	3979.3	10205.9	9608.43	11230.6	8804.38	13807.8	11971.6	11115.8	13479.8	10162.4	9726.86	12161	10670.2	12255.6	8574.08	10356.2	9164.82
MA1930.2	CTCF	7022.92	4744.56	4834.66	6126.23	3462.67	8790.28	10430.6	9525.3	10280.3	10016.2	4150.18	4480.38	4606.06	9185.8	10038.5	4542.17	5246.96	5157.04	7915.59	9638.38	9379.18	7572.82	12285.8	10917.9	10407.4	8044.66	13013.8	9996.63	15525	9932.73	7103.02	3558.32	9147.21	8118.72	7993.64	7731.97	11654.3	10354	9647.03	11510.6	9206.63	8368.66	10048.3	8896.68	10177.2	7253.27	9324.84	7992.36
MA1931.1	ELK1::HOXA1	7083.47	1078.04	931.977	1029.65	1428.67	1481.04	1634.33	1586.66	1275.11	1423.43	1496.48	1089.89	1149.08	1454.56	1326.96	1172.72	1244.06	1921.59	1565.1	1623.9	1811.25	937.789	478.339	934.113	603.115	504.149	629.004	609.566	712.374	640.778	1417.33	211.982	1094.83	1221.64	532.129	944.104	704.85	1022.34	596.926	1207.39	1283.52	637.851	585.403	851.598	604.851	825.507	543.337	502.782
MA1932.2	ELK1::HOXB13	4053.88	532.397	679.1	1012.14	1145.82	812.373	914.268	805.299	705.611	746.879	733.146	638.987	1080.91	750.483	803.598	695.898	1001.04	857.684	994.206	767.429	1066.52	865.515	406.168	618.75	513.118	656.264	422.537	512.389	462.022	444.649	781.271	158.838	685.844	446.147	398.121	486.577	568.741	661.645	538.019	729.513	731.625	492.014	523.265	562.921	519.246	537.279	472.172	381.781
MA1933.2	ELK1::SREBF2	5457.08	2197.79	3373.59	2362.24	3396.01	5832.96	5537.04	5488.17	4175.76	4714.5	3207.16	3932.32	2957.91	4373.99	3850.34	3385.32	3215.92	3610.4	5070.23	5830.78	5213.08	4174.22	3338.3	3958	3402.43	2935.8	3493.93	3763.41	3377.06	3476.59	5472.99	1215.17	5159.56	2929.63	2803.76	5049.75	4010.35	4724.45	3487.3	4644.87	5131.95	3080.25	3587.63	3850.23	3491.58	3285.24	3406.87	2872.74
MA1934.2	ERF::FIGLA	5092	8764.02	9567.4	7778.39	6419.09	9277.06	8880.58	9624.58	10306.6	10494.4	5193.84	5714.76	5844	9933.94	8814.21	8118.81	4714.33	6891.15	10770.2	9165.23	9210.23	8690.41	10476.5	12283.2	11222.8	10715.3	10560.2	10557	13367.5	12243.3	7062.12	5097.73	7319.34	10609.9	9152.87	8332.32	13994.9	11517.9	12961.5	9885.36	8214.92	10448.7	12136.5	10381.6	10968.7	9936.87	10906.3	10931.9
MA1935.2	ERF::FOXI1	4164.61	2881.83	5348.51	2622.28	6363.24	3135.48	2884.76	2888.35	3716.1	2862.73	3450.1	2838.7	4036.39	3665.7	3262.03	3371.44	3661.67	4386.84	3954.44	2704.37	3653.52	3908.04	3345.01	2728.49	2196.2	4819.84	4065.32	3259.85	2320.86	2428.78	3354.15	1049.76	2497.98	3019.63	2926.06	3190.59	2812.11	3465.34	2794.16	3271.26	3032.23	2962.4	2784.75	3242.21	4997.39	3276.84	2420.73	2935.33
MA1936.2	ERF::FOXO1	4925.9	4675.69	25395.8	3964.49	6647.89	4176.4	3084.73	3410.88	4329.18	3800.64	3935.99	3809.01	4512.33	4405.87	3197.07	3707.49	4467.53	4105.63	5259.32	3187.11	5607.28	4706.57	4385.61	3516.9	3210.35	5875.95	4879.98	4302.3	3282.51	3177.02	3779.55	1436.7	3130.34	4204.88	3815.97	3972.5	3781.89	4076.09	3691.51	3696.04	3607.38	3974.42	3890.15	4072.15	5839.41	4287.04	3418.17	3986.79
MA1937.2	ERF::HOXB13	877.216	684.699	1011.51	710.072	900.799	692.532	617.192	709.567	571.891	601.677	793.523	818.352	996.924	581.73	621.721	946.699	1026.22	860.808	927.558	690.766	752.771	615.203	580.72	650.686	530.58	649.744	560.182	533.843	474.916	447.335	787.406	198.845	1195.51	603.159	493.097	658.452	493.395	508.958	585.144	669.489	710.48	547.992	523.265	573.746	559.943	833.902	506.06	552.852
MA1938.2	ERF::NHLH1	5598.95	2402.41	7709.17	9995.29	2776.26	7749.89	8183.15	9261.6	8995.04	7609.45	3596.73	4319.7	3327.95	7301.39	7820.08	5786.27	3621.37	4816.47	6946.18	8321.53	7288.66	8066.39	11483.5	10734.3	9757.3	10232.9	11658.2	8691.68	12310.2	9167.02	7029.39	3572.65	8019.34	8817.62	10394.1	8046.67	12249.8	10320.8	11157	11238.2	8426.37	8406.96	10022.2	8833.53	15340.2	7591.87	8329.66	8630.74
MA1939.2	ERF::SREBF2	1408.39	515.18	3296.92	657.539	808.917	985.771	1524.05	961.306	850.673	950.614	950.215	744.862	733.999	834.86	929.179	891.186	793.277	740.514	1232.9	1030.96	974.579	664.561	914.718	900.182	797.885	736.667	835.471	869.547	922.97	814.07	816.039	388.137	799.103	978.459	733.791	1077.25	979.499	1040.04	948.405	911.891	928.275	1035.59	1030.18	755.974	811.146	825.507	1128.47	899.166
MA1940.2	ETV2::DRGX	754.371	625.765	547.661	585.744	464.812	436.412	394.18	407.746	370.117	456.022	602.33	504.464	555.064	398.445	439.226	716.716	543.961	653.027	543.86	384.513	495.334	366.654	302.109	383.226	271.335	310.747	276.89	336.965	244.979	282.103	617.654	112.261	1055.51	312.111	235.49	556.779	289.232	307.587	316.135	397.076	549.776	378.586	320.5	353.63	252.606	492.506	288.048	652.991
MA1941.2	ETV2::FIGLA	8837.91	7856.82	13169.6	11434.7	9056.63	15987.1	13649	15919.4	16451.7	17207.7	7258.15	7943.12	6719.19	19407.6	14389.3	11919.5	7041.28	9645.43	15357.8	15430	13672.8	13077.9	15437.8	16654.4	15071.2	15593.9	15472.2	14765.9	16006.4	15949.6	10559.4	6603.7	10929.5	14782.2	13385.2	12520.3	18843.8	14775.3	17169.5	14717.2	12054.9	14137.3	15773.2	14358.1	15131.1	15091.4	13916.7	14968.7
MA1942.2	ETV2::FOXI1	4367.05	2857.99	23042.3	2741.35	3313.14	3182.68	2985.98	2996.05	3701.77	3037.88	3011.65	2529.79	3621.31	3547.1	3353.58	2992.76	3171.85	3958.78	3087.84	2838.13	5313.07	3363.35	3647.12	2401.15	1751.59	2625.05	3918.07	3117.24	2397.14	2289.07	3223.25	1029.46	2274.61	2854.95	2635.92	2994.5	2457.25	2870.08	2617.44	2867.26	2896.9	2759.11	2599.97	2995.03	2335.2	2924.25	2183.51	2828.93
MA1943.2	ETV2::HOXB13	541.555	447.637	501.943	479.802	367.526	453.38	584.687	540.264	300.272	392.043	333.51	343.783	340.829	307.506	626.052	490.698	311.015	374.944	354.077	574.174	347.079	278.516	285.325	301.391	227.008	206.44	297.697	294.056	235.309	349.271	433.585	109.873	280.001	264.241	261.511	329.226	281.94	276.607	257.228	214.698	393.301	282.835	256.727	236.355	242.782	305.018	294.825	373.436
MA1944.2	ETV5::DRGX	1763.08	756.215	735.771	829.147	868.37	1078.57	1159.09	959.533	911.563	1367.16	1125.6	845.755	863.027	1022.36	2837.03	1018.07	877.641	1138.89	1007.98	877.632	918.265	858.464	629.393	736.512	585.653	677.994	580.989	642.379	472.767	507.786	889.667	239.451	652.81	829.105	1040.84	757.704	576.033	688.199	657.797	824.164	801.404	745.387	590.308	745.148	540.296	937.441	507.19	965.926
MA1945.2	ETV5::FIGLA	16170.5	18537.2	26460.1	28316.2	17300.7	35320.2	31834.4	36175.9	37821.2	37310.8	23459.2	21825.2	23636.5	42759.7	30234.2	29162.3	24296.9	24329.2	33881.9	36353.5	28146.7	29871.7	35398.7	34440.4	36653	34686.4	35307.5	33290.1	35474.7	33260	25661.3	13026.5	24300.3	33104.8	30816.6	27345.1	36061.6	32296.7	34160.3	31849.2	26867.1	30849.6	32211.9	37277.3	35509.4	32846.8	27999.4	32128
MA1946.2	ETV5::FOXI1	4427.6	6478.82	8175.39	4569.5	6087.6	5480.86	4345.04	5117.21	7010.74	4872.41	6177.12	5290.02	6170.22	6249.03	4879.12	5745.62	6428.06	6977.08	7394.46	4782.66	6235.93	9469.55	6983.75	6007.86	4745.67	7179.78	7135.12	6350.59	5218.7	5022.78	5816.58	2313.89	5074.62	6200.1	7285.87	6223.83	6943.99	6311.07	6151.87	6196.24	5605.6	5580.09	5888.36	5972.01	6465.31	7393.19	4675.41	6116.83
MA1947.2	ETV5::FOXO1	4728.66	10148	7639.64	4711.34	5033.66	5939.02	4564.34	4768.86	6540.93	4691.36	6451.69	6513.19	6661.98	6118.71	7405.6	5249.97	6321.03	5864.75	5901.34	4439.27	5238.36	5163.13	5625.94	5101.69	4293	5284.88	6162	5460.85	5490.54	5339.81	4789.89	2788.02	4137.09	7393.01	8248.65	6371.49	5983.93	5171.45	6536.73	5178.15	5222.87	6441.85	6444.33	5207.02	4702.68	5966.04	5435.63	7310.16
MA1948.2	ETV5::HOXA2	1507.01	812.501	1546.31	903.569	1217.88	1165	925.377	959.09	902.011	1149.36	820.836	848.246	809.468	780.015	2772.07	1022.04	829.793	1010.79	1230.66	929.939	1038.94	1166.95	763.664	840.303	734.753	743.186	805.062	959.152	615.672	668.988	1578.9	266.919	1464.5	775.491	727.286	1924.52	777.766	1241.41	759.902	1304.35	1454.79	761.591	799.614	806.492	644.145	1071.76	605.465	784.423
MA1949.2	FLI1::DRGX	982.759	410.555	567.663	645.281	508.05	766.769	945.539	772.945	491.301	784.54	474.389	447.166	547.76	672.669	635.331	585.863	564.108	632.718	757.581	761.839	545.902	349.027	293.717	377.238	268.648	312.92	307.3	342.013	334.16	306.284	617.654	133.758	396.405	325.515	775.425	387.325	291.662	382.825	337.734	413.236	458.851	410.994	312.324	398.736	245.589	352.59	248.512	463.144
MA1950.2	FLI1::FOXI1	3645.55	3520.84	6101.9	2302.7	2790.67	2338.49	2129.31	2221.77	2705.44	2159.87	2902.4	2673.03	3010.25	2566.46	2374.91	2659.68	2999.34	3271.38	3373.55	2089.87	3020.28	2450.24	2818	2033.89	1709.95	2518.57	3353.09	2621.26	1972.73	1898.15	2695.59	878.981	1999.33	2577.31	2574.77	2716.12	2031.91	2732.88	2275.78	2435.56	2334.43	2482.17	2380.86	2188.54	2554.13	2484.92	2132.68	2534.77
MA1951.2	FOS	9332.75	540.343	1054.37	4406.65	868.37	465.577	1114.24	473.783	606.515	422.898	681.395	498.236	559.933	875.173	408.295	665.168	484.78	920.174	438.98	459.579	468.901	800.293	1305.78	798.387	967.134	580.207	1512.49	1041.18	1377.47	975.272	961.249	355.295	1079.1	622.307	2599.49	2926.72	1288.17	1325.5	1011.24	1066.57	1277.17	998.76	1084.14	972.482	895.348	638.019	1329.54	746.871
MA1952.2	FOXJ2::ELF1	2828.89	2037.54	3029.76	2174.87	4786.84	1763.15	1735.96	1793.2	2304.28	1635.78	1877.43	1548.27	2374.85	1899.88	1719.17	1930.08	2086.44	2282.47	2209.54	1778.42	1774.47	1762.76	1470.26	1143.69	909.374	1162.59	2199.11	1191.37	1496.74	1096.17	1987.95	529.658	1214.38	1361.42	1567.76	1336.27	991.651	1296.74	1111.38	1375.92	1528.8	1346.41	1363.76	1212.44	1066.56	1326.41	1423.29	1228.79
MA1953.2	FOXO1::ELF1	4147.31	3756.58	5667.1	2483.06	2585.29	2450.91	2207.08	2405.26	3041.53	2302.8	2236.81	2001.66	2389.45	2754.43	2389.14	2562.53	2222.43	3515.1	3671.14	2273.94	2751.35	3209.99	2717.3	2075.81	2009.49	2405.58	3281.07	2868.62	2217.71	2156.08	2871.48	1012.74	2049.67	2935.38	3027.54	2895.25	2185.04	2429.72	2534.97	2327.05	2383.07	2542.57	2655.57	2800.17	2116.28	2624.83	2272.75	2743.4
MA1954.2	FOXO1::ELK1	4427.6	3965.16	6688.61	2846.42	6074.99	3009.28	2639.12	2808.57	3510.14	2784.69	3033.21	2524.81	3153.88	3613.2	2984.26	3245.54	3101.34	4291.54	4987.56	2602.95	3391.49	3721.19	3385.3	2602.74	2192.17	4574.29	3846.05	3784.86	2478.8	2502.66	3286.65	1086.19	2469.67	3280.04	3398.34	3306.79	2807.25	2920.97	2892.34	2915.74	2896.9	2957.98	2881.23	3348.66	4298.51	3758.16	2520.14	3177.33
MA1955.2	FOXO1::ELK3	3173.2	3022.87	2047.3	1639.91	1652.06	1735.57	1834.3	1644.72	2056.54	1455.64	1579.86	1411.25	1797.87	1759.25	1542.86	2343.45	1657.07	2085.62	2708.97	1595.15	2818.01	1854.42	2024.13	1504.96	1153.84	1592.85	2688.87	1929.66	1737.42	1465.59	2041.12	709.992	1505.4	1918.62	2254.72	2047.98	1776.71	1697.26	1629.76	1715.28	1704.31	1733.84	1936.08	1529.99	1347.23	1919.65	1831.08	1762.87
MA1956.2	FOXO1::FLI1	2847.92	2300.43	1911.58	1211.76	1378.22	1314.54	1315.03	1337.14	1509.12	1182.03	1418.85	1074.94	1506.95	1554.41	1284.89	1697.12	1420.34	2073.13	2498.17	1309.26	2281.3	1552.99	1710.27	1033.91	960.417	1312.53	2208.72	1577.55	1174.4	986.018	1656.62	504.578	1097.98	1451.41	1091.58	1607.4	1110.75	1265.76	1205.63	1292.81	1410.39	1314	1414.45	1299.05	1128.31	1438.34	1225.61	1410.29
MA1957.1	HOXB2::ELK1	3249.33	747.607	824.826	1170.61	1062.94	999.028	1002.73	986.125	830.973	927.472	813.649	643.97	785.123	798.297	862.368	902.091	856.236	1070.15	2827.11	969.069	1046.98	624.017	493.444	672.641	502.372	451.996	507.365	579.277	410.448	499.726	848.763	178.543	712.586	421.254	369.498	651.19	493.395	756.798	538.019	842.633	930.39	511.165	503.642	579.159	485.565	607.238	381.804	461.057
MA1958.2	HOXD12::ELK1	1110.79	1051.55	918.642	858.04	1342.19	885.02	744.334	732.613	807.691	701.503	990.466	771.02	1049.27	789.39	757.819	1021.05	1169.77	1034.22	938.924	728.299	773.457	773.852	634.428	742.5	643.413	1264.72	633.806	681.502	639.31	697.198	940.797	290.804	707.867	871.23	733.791	999.782	709.711	672.709	773.647	833.399	767.572	1047.37	693.326	775.82	2113.47	954.231	678.889	799.027
MA1959.2	KLF7	289808	292016	218953	182727	310610	64593.2	98862.7	86639.4	46053.9	61503.1	357852	388148	412006	165057	291086	358063	428270	351469	55385.7	85281.3	351963	213862	225056	224670	286237	234616	239039	217147	237055	238880	239155	68444.1	265324	176684	217698	218248	169798	250777	216126	278780	259856	190414	234737	225029	276546	249415	221207	173764
MA1960.2	MGA::EVX1	3332.38	3033.47	4119.37	4188.64	3266.3	3335.39	3354.24	3071.84	3122.71	3351.88	3566.54	3672	3459.41	3327.72	3030.66	3007.63	4300.07	3886.92	3651.16	3235.02	2457.14	3158.87	2982.48	2223.51	2217.69	2703.28	2978.57	2900.17	3363.09	3107.17	9919.28	1350.12	6295.29	3877.45	3822.48	5490.33	2595.79	3452.06	3222.22	2971.15	4713.27	3847.73	3062.73	4470.89	2521.85	2454.14	3892.6	3982.62
MA1961.2	PATZ1	739507	193624	156481	123802	870429	228112	146276	137487	203128	216117	703848	465611	322148	121981	211364	249208	340662	545957	60093.4	142874	266572	586328	592026	519349	268459	462181	618891	421812	394090	451575	478888	50801.1	611867	238836	327549	289838	405860	464906	344198	496761	521610	259583	370602	505010	636814	574427	345933	248808
MA1962.1	POU2F1::SOX2	223.197	791.973	377.172	362.478	322.486	183.473	209.845	194.123	168.344	171.065	241.507	206.768	204.497	168.753	181.258	665.168	195.171	303.079	227.154	194.852	288.466	227.396	182.944	179.637	161.189	204.268	206.467	184.258	347.054	205.532	445.856	101.513	276.854	386.788	178.244	348.592	167.706	263.33	241.519	182.378	338.324	413.94	282.89	250.788	169.807	223.866	370.508	504.868
MA1963.2	SATB1	515.602	354.269	772.441	1453.41	317.081	336.721	374.43	391.791	238.785	328.064	207.006	662.653	220.321	370.32	344.576	516.472	217.836	309.329	297.074	396.891	196.525	438.927	191.335	223.548	167.905	236.863	256.083	198.141	116.043	175.979	1456.19	52.5478	386.967	193.394	143.115	404.27	218.747	376.186	155.122	184.687	357.354	206.234	150.439	326.566	207.698	215.471	143.459	244.089
MA1964.2	SMAD2	0	0	0	0	0	0	0	0	0	0	0	0	0	0	0	0	0	0	0	0	0	0	0	0	0	0	0	0	0	0	0	0	0	0	0	0	0	0	0	0	0	0	0	0	0	0	0	0
MA1965.2	SP5	0	0	0	0	0	0	0	0	0	0	0	0	0	0	0	0	0	0	0	0	0	0	0	0	0	0	0	0	0	0	0	0	0	0	0	0	0	0	0	0	0	0	0	0	0	0	0	0
MA1966.2	TFAP4::ETV1	10069.8	9771.2	15040.7	13754	16043.2	19223.9	17857	19766.8	21003.6	20274.2	10450.9	10547.6	10329.5	21226.3	17332.7	15942.2	11983.5	13594.8	18708.7	18822	18858.3	19122.4	21622.6	24783.9	23033.9	26274.4	21922.3	20028.6	20808.2	20897.1	15058.9	7702.43	15989.9	18495	16808.2	16219.2	28011.7	20882.8	22748	21541.4	17493.4	17123.3	21300.1	20958	21915	19694.6	17082.9	18546.6
MA1967.2	TFAP4::FLI1	5605.88	4087.67	4066.5	6190.15	4433.73	10064.5	8901.15	10312.9	12408.5	11323.9	8005.67	5060.83	3936.57	9752.06	10746.8	6605.09	4974.98	5533.55	8752.39	9628.4	8070.16	6936.46	10164.3	9127.56	9734.47	18957.8	9889.61	8754.78	11260.5	9998.55	7350.49	5038.61	8315.07	13363.3	9904.88	13856.5	9296.73	10227.8	11877.6	11134.3	8984.61	11658.1	10890.4	6924.65	10817.2	8481.74	10063.6	12517.4
MA1968.2	TFCP2	13258.6	866.138	671.48	443.904	1120.59	532.39	447.259	475.113	433.395	510.927	741.771	839.527	789.992	672.201	579.655	716.716	1381.31	567.102	1447.48	463.971	659.68	491.81	372.601	556.875	565.505	614.975	384.125	625.973	459.873	1507.24	372.228	165.406	393.259	484.442	1017.42	464.79	498.256	380.612	541.946	431.705	452.508	559.777	587.038	550.291	781.675	540.078	629.187	538.248
MA1969.2	THRA	15954.3	11287.6	13410.6	19157.9	11883.3	19126.3	16371.6	18263.9	16799.7	18367.5	8889.76	11851.8	9202.38	13753.9	18744.4	12843.4	9388.37	12026.3	19411.2	17399.3	16444.9	16162.8	21293.6	16378.9	16474.9	17364.9	22634.6	22285.1	31214.4	26852.2	36711.5	10652.9	33708.6	24543.8	18147	42898.6	24059.7	26934.9	23704.2	19306.7	37160.6	24991.1	23854.3	22498.8	19735.5	17165	38215.5	22180.8
MA1970.2	TRPS1	664.4	754.891	1288.19	924.582	852.155	822.978	685.084	695.384	755.755	730.997	885.526	691.302	828.944	647.356	541.3	912.004	834.83	676.461	1212.92	661.219	550.499	604.627	696.528	800.383	615.204	612.802	659.414	638.593	433.012	534.653	983.747	191.083	509.664	714.217	426.744	723.813	532.283	681.561	594.962	604.849	638.586	724.764	541.252	608.027	565.557	738.759	580.614	657.163
MA1971.2	ZBED2	2041.65	505.909	1325.34	404.505	855.759	838.356	846.788	787.127	386.832	869.392	899.901	859.456	1016.4	641.731	690.389	1182.63	946.896	584.287	789.096	724.705	759.666	928.975	1223.54	1916.13	1382.2	886.608	1331.63	1125.74	626.416	1006.17	631.97	335.589	766.069	658.688	791.037	760.125	1076.72	843.099	742.23	736.438	837.351	1113.66	1089.05	1059.09	1117.08	1172.5	1477.52	830.321
MA1972.1	ZFP14	61896.5	41588.5	80104.3	38252.8	77072.3	66048.2	64466.6	70286.1	67526.1	66557	98250.2	85293	99993.1	76043.5	58620.6	63447.7	104827	69344.3	80269.4	67365.3	68707.8	68564.3	86189.9	75619.2	70809	85559.8	88137.4	79227.2	81899.4	85786.3	71324.7	35966.6	91591.6	80296.8	94181.6	68496	78513	70203	82254	72221.7	71572.4	74610.9	78573.1	73627.2	75381.9	76808.6	93652.8	78903.4
MA1973.2	ZKSCAN3	8149.28	30808.8	15427.4	12245.5	11061.8	23721.1	21933.4	24674.4	24146	25931.6	14351	14639.4	12941.8	23771.7	40844.3	13073.4	13160.8	13032.4	16745.5	23123.1	21093.7	18140.6	27324.1	23861.8	25549.8	24783.7	27319.3	23520.7	39826.3	31615.7	14095.6	13413.4	15986.8	32898	29959.2	17613.6	24018.4	21905.1	35261.8	22282.5	16457.3	35338.1	33734.2	20660.3	24700.7	21471.6	31668.3	33390.1
MA1974.2	ZNF211	1109.06	1512.43	4129.84	5170.13	1185.45	1351.66	802.35	1123.96	1289.44	1568.17	572.142	478.306	574.54	828.766	794.937	1165.78	601.883	731.14	1182.78	1369.95	678.068	881.38	476.66	475.04	486.253	588.899	532.973	499.768	498.554	707.945	10520.6	901.075	2406.75	898.037	594.579	1488.78	384.022	814.332	718.667	681.032	1450.56	964.878	459.492	2298.59	557.137	691.188	977.103	1047.29
MA1975.2	ZNF214	2896.37	2280.57	2703.07	1813.27	4487.78	1484.22	1291.17	1317.2	1883.42	1477.42	1424.6	2090.1	1757.7	1901.29	1571.93	1309.52	1143.33	1827.85	1732.33	1175.5	1471.06	1621.74	1542.43	1550.87	1246.53	1592.85	1438.87	2058.39	1636.42	1395.74	2425.62	637.142	1788.54	1970.32	2671.05	2016.51	1706.22	1856.59	1614.06	1532.9	2154.7	1835.48	1667.91	1578.7	1474.94	1774.14	1714.73	2121.7
MA1976.3	ZNF320	51395.8	46519.8	69455.4	65690	46837.9	62770.1	65294.9	64642.4	71624.8	61175.1	45805.8	62913.5	53533.2	64878.1	93678.9	52856.6	50738.3	44227.7	74104.6	64251.6	55047.6	85841.2	55138.2	55142.6	56332.8	46060.1	56845.7	55245.9	60985.9	54033.5	45964.1	20648.9	49264.4	53221.6	55359.6	46239.3	54504.4	50021.7	51753.9	45686.9	47234.2	56746.6	55570.7	49228.5	54976.9	50512.7	57540.6	49356.1
MA1977.2	ZNF324	4540.07	6747	6686.71	6484.33	6979.39	9523.11	6859.07	7656.32	9491.72	9468.02	9824.16	8690.47	7893.84	11509.9	10304.5	6942.13	8246.3	6839.6	10206.6	7213.11	7570.23	7860.15	8477.51	7884.07	8281.08	9872.2	8028.21	10396.7	10508.3	13911.7	7839.3	5081.61	7981.59	14973.7	10702.4	9908.25	7520.02	8762.92	13986.5	8858.04	8045.76	14241.9	12388.3	8784.81	8410.38	9156.14	9994.69	15012.5
MA1978.2	ZNF354A	173.021	397.311	251.448	255.661	246.819	132.567	116.444	116.562	132.526	101.641	196.943	173.137	157.025	106.408	144.759	269.636	158.655	184.347	156.028	133.362	218.361	193.904	127.557	133.73	84.6242	136.903	153.65	92.129	186.958	142.395	247.471	71.0589	1005.17	193.394	98.8797	111.356	85.0681	101.791	131.559	124.663	152.246	181.191	178.237	119.079	103.849	212.673	141.2	231.572
MA1979.2	ZNF416	9092.25	20054.9	63992.6	11787.5	5185	12849	11385.1	11397.8	13701.5	12630.2	7041.08	7111.07	7601.7	12338.7	14226	10805.3	8160.68	6088.15	8554.86	10760.4	10004.4	8366.06	11463.3	9510.79	9322.09	13564.2	10849.9	12277.1	12405.8	12117	6773.74	5804.74	6877.32	16616.6	15930	9508.82	9722.07	10296.4	14153.4	10100.1	7973.86	18590.5	13274.6	9327.89	10733	9908.89	12476.4	17223.9
MA1980.1	ZNF418	1974.17	3395.02	1971.1	3694.82	2803.29	3904.37	3666.53	3575.31	4705.86	3425.84	3123.78	2686.74	4114.29	4951.03	3286.15	2933.28	3256.21	3510.41	3022.92	3533.29	4464.91	2836.28	3789.79	3413.11	2818.12	3581.2	3514.74	3100.84	2528.23	2498.63	2372.45	994.825	2502.7	3019.63	3345	2750.01	3123.22	3246.26	2695.98	2987.31	2651.61	2766.48	2640.85	2975.18	2956.89	3814.12	2155.27	3010.43
MA1981.2	ZNF530	105570	141147	171595	177396	217422	184893	196901	212139	211747	186152	241324	231866	281853	207549	186877	180278	280333	203490	50835.7	106701	211935	192187	213775	197581	208028	195223	217983	183553	193939	195447	176833	82328	211153	176214	176806	171929	179503	177055	178243	182404	174463	169673	174342	189836	200214	200369	179907	169767
MA1982.2	ZNF574	20184.6	16537.4	11578	14875.6	15072.2	18251.9	18032.3	19167.2	15250	17992.7	10761.4	11598.9	10956.4	20409.3	17937.1	11652.8	10953.5	10507.8	14516.1	19924.4	17129.8	12894.6	15199.4	18307	15738.8	15424.4	15654.7	17133.5	22452.1	20585.5	11882.7	7220.54	13602	18288.2	18461.9	14197.9	22161.5	17025.7	19459	17072	13856.5	18838	18770.5	16923.7	18022	15799.4	17428.6	17705.9
MA1983.2	ZNF582	1437.8	2824.22	3225.01	2476.93	2996.06	4626.6	4033.56	4081.45	4271.27	4730.38	4591.51	4005.81	8239.53	4644	3135.83	2183.85	5901.73	1830.98	3238.88	4213.27	2983.5	2556	3084.87	2742.46	2565.59	11912.7	2952.96	2664.17	2170.43	2368.32	2574.92	1258.76	2387.87	3599.81	2871.41	3105.86	3118.35	3055.96	2707.77	3075.03	2886.32	2928.52	2734.06	2605.31	9631.31	2921.46	2291.96	3385.96
MA1984.2	ZNF667	1968.98	1393.24	1708.7	3767.5	1392.63	2942.46	2366.73	2699.55	2292.94	2646.75	1450.48	1641.69	1334.1	3503.04	1502.65	3845.28	1283.09	1624.76	1643.29	2648.47	1540.02	2261.62	2228.89	1846.27	1598.46	1949.23	1776.58	2501.37	1903.96	2000.25	2351.99	971.536	1856.18	2753.47	2529.24	2720.96	1759.69	2082.3	2389.67	2218.55	2068	2536.67	2402.11	1953.98	1779.47	2053.97	1880.78	2803.9
MA1985.1	ZNF669	6285.85	3674.46	9408.82	3954.86	7865.77	6763.06	10426.9	7794.6	6920	6907.49	4444.88	5070.79	4696.13	9426.75	7367.86	7083.89	5216.74	12480.9	6170.17	7749.36	11643.2	9517.14	13786.2	14981.7	16783.8	10528.5	15305.8	12675.9	14264.7	12419.3	9129.82	3698.65	11277.1	7611.3	8951.21	8310.54	16690.4	12363.2	11606.7	13740.7	11746.2	8520.39	12728.4	12057.7	14516.4	8369.8	10270.3	8267.74
MA1986.2	ZNF692	13172.1	12840.4	82224.4	47996	14230.8	24014.3	23701.8	22762.4	29719.8	29568.9	13965.7	21319.5	16000.7	25551.1	43378.8	12897.9	15518	17967.6	25784.4	21742.4	23445.1	32038.2	15901	21794	15756.2	17025.9	15627.5	15059.9	23876.9	21438.5	14813.5	5405.85	16458.7	17543.3	26086	16011	23719.4	23854.6	18606.8	19595.3	13518.1	17006.9	19050.1	13732	19007.2	19431.6	14443.1	18433.9
MA1987.2	ZNF701	270451	184270	188520	220543	244738	198821	112574	216065	192414	195449	302499	222681	420070	116816	204160	199477	401493	213265	59534.9	120957	251439	270515	319891	210385	360194	284319	340495	227164	204218	238520	274316	34703	360531	177266	202196	182602	187155	210956	179578	220015	278635	176791	177377	260907	335531	266908	234213	163692
MA1988.2	Atf3	489.649	788	620.048	832.649	637.765	1041.98	791.241	996.319	914.548	1109.88	323.447	367.449	995.707	787.515	804.217	547.202	292.127	729.578	771.53	857.668	473.498	611.678	483.374	532.923	494.313	643.225	468.952	641.117	581.288	603.164	558.343	282.444	498.653	674.007	685.652	573.725	486.103	551.002	624.416	706.427	575.15	679.098	760.369	535.857	613.271	450.531	528.652	684.284
MA1989.2	Bcl11B	3322	3256.63	2577.34	1992.75	1763.76	2336.37	1884.49	1959.84	3116.75	1891.25	2163.5	2092.59	1519.12	1840.35	2072.4	2369.23	1771.65	1780.98	2759.08	1906.99	1730.8	2496.07	2171.83	1586.79	2196.2	2972.74	1901.42	2720.96	2417.56	2164.14	3266.2	1155.45	2249.44	2809	2161.04	2699.17	1487.48	2305.8	2295.42	2373.22	3047.03	2700.19	2858.33	3245.82	2197.67	2045.58	2328.1	3287.9
MA1990.2	Gli1	32116.1	22352.7	12515.7	18280.6	13512	17422.5	15389.9	15657	20007.8	16510.3	19520.4	20106.3	19126.6	15332.2	18983.2	15911.5	18399	18762.8	25793.9	15197.3	19397.3	13883.5	19066.4	13692.3	17935	18325.4	19433.5	22275	21548.5	18825.7	20842.7	6373.8	18453.3	19023.5	19299.7	20102.2	15689	19745.3	18950.4	20643.4	17861.4	18883.6	19689.5	16936.3	19492.8	14727.6	21871.3	19262.2
MA1991.2	Hnf1A	4789.22	2736.81	3567.89	2526.84	2686.18	2226.07	2115.32	2114.07	2883.93	1969.74	2466.82	2208.43	2658.46	2498.02	2295.73	2828.2	2630.41	3001.11	2845.53	2036.76	2769.74	2088.87	1977.13	2147.66	1735.47	2866.26	1963.84	2428.17	2309.04	2513.41	2370.4	927.348	1890.79	3201.53	2840.19	2909.78	1990.59	2146.47	2937.5	2294.73	2332.32	2795.94	2626.14	3834	2048.92	2851.5	3152.71	3394.3
MA1992.2	Ikzf3	8483.21	5575.6	18463.3	8832.56	8417.06	16319	13708.3	15581.7	16234.4	15790.6	8403.87	8176.05	8147.02	15126.9	12437.5	9356.96	8640.42	11820.1	11924.3	14568.8	14036	10072.4	10875.9	9327.16	7694.08	10889.2	9950.43	13299.4	9532.7	9433	9227.99	4023.49	8529.01	11492.6	13985	10603	10193.6	10318.6	10970.5	11231.3	9676.06	10733	10391.7	9551.61	10182.8	10219.5	8349.99	11495.1
MA1993.2	Neurod2	0	0	0	0	0	0	0	0	0	0	0	0	0	0	0	0	0	0	0	0	0	0	0	0	0	0	0	0	0	0	0	0	0	0	0	0	0	0	0	0	0	0	0	0	0	0	0	0
MA1994.2	Nkx2-1	1022.55	680.064	1043.41	432.522	610.741	757.225	531.609	739.705	836.346	668.379	504.577	412.29	712.089	660.95	676.779	644.35	484.78	537.419	648.051	761.04	679.217	437.165	305.466	339.315	404.316	430.265	316.903	388.709	300.852	1293.65	494.941	140.923	383.821	449.976	463.173	559.2	371.869	444.785	431.986	436.322	475.768	394.79	341.757	485.339	405.573	506.498	340.009	438.109
MA1995.2	Npas4	3584.99	429.758	1529.17	662.792	1176.44	733.362	819.632	838.982	521.149	703.772	516.077	818.352	659.747	656.731	621.721	556.124	581.736	713.955	966.823	831.315	845.861	497.099	699.885	870.242	957.731	677.994	904.294	771.107	712.374	948.405	771.045	256.17	1039.78	499.761	510.011	1176.5	1176.37	1398.53	630.307	877.262	1050.92	550.938	778.356	642.307	893.945	772.339	595.299	452.712
MA1996.2	Nr1H2	0	0	0	0	0	0	0	0	0	0	0	0	0	0	0	0	0	0	0	0	0	0	0	0	0	0	0	0	0	0	0	0	0	0	0	0	0	0	0	0	0	0	0	0	0	0	0	0
MA1997.2	Olig2	0	0	0	0	0	0	0	0	0	0	0	0	0	0	0	0	0	0	0	0	0	0	0	0	0	0	0	0	0	0	0	0	0	0	0	0	0	0	0	0	0	0	0	0	0	0	0	0
MA1998.2	Prdm14	1685.22	1919.67	2945.94	3886.57	1086.36	2807.25	2281.14	2432.74	2066.09	2939.42	915.714	1975.5	827.727	3384.91	3012.1	1277.8	1094.22	1412.29	2940.6	2257.97	1075.71	3497.32	2138.26	1552.86	1636.07	1366.85	2338.36	3064.24	1927.6	2059.35	38848.8	671.178	22507	1499.28	2439.47	13120.6	2590.93	7278.09	1360.76	2345.52	24904.8	1717.63	1416.09	4102.83	2037.69	2076.36	2241.12	1489.57
MA1999.2	Prdm5	8228.87	16430.8	8231.11	9280.84	9661.97	10858.3	10947.8	10632	10680.3	10955	15989.8	12876.9	18957.4	12588.5	11356.2	12027.5	18231.5	9898.52	12439	10132.7	10754.9	12288.2	12839.6	11734.3	11324.9	21850.1	12147.9	15697.3	11073.5	12435.4	11831.5	5590.37	11157.6	16574.4	13642.8	14195.5	11287.3	12664.2	15480.8	13359.8	13991.8	15563.3	13977.7	15285.5	19014.2	15242.5	15038.3	16775.4
MA2001.2	Six4	970.647	1123.07	1479.16	1208.26	882.783	1167.65	928.258	992.33	898.43	977.385	955.965	1172.1	973.796	1275.49	1119.1	973.465	979.634	838.937	1261.31	997.019	884.936	860.227	837.513	1165.65	706.545	869.223	880.286	945.269	1300.11	1213.04	1386.65	491.441	1137.31	1215.89	1386.92	1345.95	612.49	1318.86	1032.84	1158.91	1497.08	1063.58	977.851	736.127	955.693	965.424	1204.15	1397.78
MA2002.2	Zfp335	5704.5	3694.99	8000.62	6694.46	6118.22	9778.17	9064.09	8754.13	18005.6	10698.6	5251.34	4798.01	4843.42	11536.6	8920.62	10210.5	5724.19	6506.84	8642.34	8698.06	9758.44	8789.12	11084	10436.9	11232.2	12140.9	10616.2	10583.5	8776.27	7988.9	5618.2	3917.2	6570.58	10705.6	10019.4	7315.6	7833.56	8437.63	9766.81	9716.83	7149.2	9673.83	9054.12	9443.36	11200.3	9799.75	6536.99	10742
MA2003.2	NKX2-4	4221.71	3863.19	3667.43	2621.4	3743.72	8775.43	8224.71	8525.44	6491.38	8430.74	4623.13	4548.89	4530.59	6701.38	6750.47	4120.87	4252.22	4169.69	4632.8	8271.22	4699.36	3155.34	2525.96	2498.95	2725.44	3563.82	2424.79	3389.84	2728.08	3189.11	3376.64	1248.61	3286.07	3877.45	3449.08	4212.16	2488.85	3447.63	3601.19	3659.11	3605.26	3606.14	3375.06	3337.83	2968.12	3380.38	2704.26	3479.84
MA2093.1	HOXB1	654.019	317.187	751.963	1359.73	270.24	269.377	212.726	461.817	259.679	347.122	260.195	191.821	206.932	178.129	226.418	191.322	206.504	253.087	324.628	564.192	205.719	192.141	369.244	267.46	216.262	230.344	419.336	379.875	265.394	321.06	1315.07	108.081	688.99	268.071	209.469	728.655	221.177	325.29	286.682	318.585	742.197	319.662	268.173	290.482	289.094	263.043	395.36	212.796
MA2094.1	PAX8	2294.26	559.546	2081.59	1315.08	985.474	1743.53	1754.47	1594.2	1492.41	1902.59	1331.16	1245.59	1370.62	1361.28	1815.67	1058.72	1281.84	1201.38	1589.73	1688.98	2145.68	2030.7	2655.2	2987.96	3136.47	2073.1	2893.74	2583.4	5228.37	2757.9	2006.35	822.85	2543.6	1778.84	1951.57	1709.07	3791.61	2918.76	2619.4	3068.11	2558.57	1934.18	2920.47	2747.85	2928.83	1860.89	2470.43	1885.95
MA2095.1	Sox7	2451.71	4921.36	3128.81	3113.46	2660.96	2496.51	2309.53	2282.49	2126.98	2148.52	2310.13	2138.68	1981.68	2341.45	2520.29	2783.59	2020.97	3232.33	3390.77	2184.5	2339.91	3236.43	2218.82	1317.34	1460.1	1901.43	2255.13	2308.27	3428.64	2477.14	5906.57	1178.74	4393.49	3998.09	3486.81	6022.9	2104.83	6669.56	2534.97	2798	6206.12	3221.66	2809.28	3022.09	2020.85	1891.67	3590.99	4293.47
MA2096.1	ZNF524	26363.2	28590.5	46196.9	27699.8	29409.3	42637.4	43457.3	44766.5	31859.9	45947.1	28139.9	32702.9	27075.2	40835.9	34611	29270.4	27873	27430.3	36923	44408.3	35056.1	31290.8	37874.4	37839.6	40590.1	33532.5	39880.2	52049.1	32691.8	36888.4	34543.6	12153.5	35332	29711.8	36865.2	34203.2	33220.3	37981.5	34992.8	40146.3	36304.2	31600.9	33932.1	38459	45234.7	34593	37571.6	29505.6
MA2097.1	ZNF75A	12194.5	16730.8	12549.5	38427.9	12867	14755.3	13070.9	13147.6	15718.6	13727	15052.5	13411.3	16948.9	18646.8	12154.8	12141.5	15965	11790.4	17176.2	14182.7	13588.9	12413.4	12915.1	14055.6	12562	14531.2	12083.9	15833.6	16849.8	16774.4	13432.9	6622.21	13312.6	20758.3	28806.5	15263	13542.8	12690.7	17658.4	13362.1	13638.7	21275.9	17634	14872.3	12954.5	15681.8	19938.5	19399.9
MA2098.1	ZNF766	2325.4	2345.46	2729.26	2302.7	2533.05	2866.11	2188.98	2409.69	2248.16	2699.83	3047.59	2323.02	2905.56	2859.43	2259.85	2998.71	3321.69	2318.4	2865.86	2281.52	2397.37	5936.98	2566.25	2732.48	2675.74	3400.84	2655.26	3402.46	3126.71	3159.56	3186.44	1411.62	1941.13	4325.51	3205.78	2464.35	2403.78	2265.97	3385.2	2227.78	3063.94	4112.89	3826.37	7574.17	2937.25	3111.74	3629.4	4389.43
MA2099.1	ZNF770	13364.1	11743.2	10860.8	10269.3	32183.7	18599.2	20933.1	19595.7	20180.3	17618.8	16403.8	16644.8	18018.9	22706.7	24787.2	22510.6	18839.7	24035.5	18245	19808.6	31969.2	21359.4	29359.9	29785.8	30449.9	24594.7	30754	29112.8	25443.5	22018.8	20632.1	6825.24	24316	17336.5	17914.1	19630.1	38467.8	26897.3	24057.7	29533.7	24450.2	18870.4	24408.7	24629.6	28982.3	21161	18199	19341.5
MA2100.1	ZSCAN16	1323.61	1489.25	1782.04	1642.53	900.799	1853.29	1627.74	1693.48	1743.13	1942.07	938.715	975.296	989.62	1488.78	2226.44	1159.83	873.864	1045.16	1452.47	1645.86	1420.5	1193.39	1683.42	1387.2	1328.47	1592.85	1486.88	1540.95	1638.57	1403.8	1376.43	666.998	1017.75	1725.23	1606.79	2035.88	1312.48	1332.14	1761.32	1472.88	1323.69	1570.32	1663	1347.76	1453.89	1536.28	1367.94	1863.01
MA2101.1	ZNF677	1205.96	2526.24	1332.96	1608.39	1529.56	1825.19	1883.26	1578.24	2112.65	1690.69	1886.05	3471.46	1716.32	1823.47	1751.95	1642.6	1689.81	2241.85	1627.45	1492.53	1944.56	1496.58	1681.74	1784.4	1344.58	1781.91	1514.09	1760.55	1563.35	1433.35	1552.32	751.791	1293.04	2041.17	1635.42	1663.08	1667.34	1555.64	1940.01	1715.28	1459.02	1996.05	1976.96	1580.51	1467.92	2193.89	1503.5	2082.06
MA2102.1	ZBTB17	162.64	117.869	223.827	66.5419	122.509	98.6301	195.856	123.21	68.0538	64.433	255.882	184.347	221.539	92.8143	89.0825	118.957	224.132	118.732	114.007	97.426	108.031	74.0359	83.9191	67.8629	88.6539	60.8456	83.227	85.8188	107.447	134.335	122.713	41.7994	116.405	91.91	104.084	183.979	77.7766	172.603	54.98	115.429	207.223	126.686	94.8418	64.9524	67.3616	106.337	117.478	158.554
MA2117.1	FOXP4	3581.53	821.109	781.013	467.544	556.694	509.589	420.925	395.78	549.803	473.719	317.697	257.837	371.26	337.975	398.397	582.889	289.609	490.551	656.834	356.563	360.87	408.961	318.892	413.165	326.408	465.034	318.503	354.634	279.362	318.374	496.986	132.564	1278.88	382.958	333.068	801.278	549.297	440.359	349.516	554.06	759.114	346.178	469.303	409.561	467.321	391.766	316.288	337.97
MA2118.1	FOXS1	3567.69	811.177	776.727	465.793	551.289	503.756	418.045	392.234	543.833	468.728	306.196	254.1	362.739	332.819	393.447	575.95	284.572	487.427	654.25	353.369	357.422	403.672	315.536	409.173	322.378	462.861	315.302	349.586	279.362	317.03	486.76	132.564	1275.73	379.129	330.466	801.278	549.297	438.146	343.625	554.06	756.999	341.759	467.668	409.561	460.304	391.766	315.158	335.883
MA2119.1	HOXA3	654.019	317.187	751.963	1359.73	270.24	269.377	212.726	461.817	259.679	347.122	260.195	191.821	206.932	178.129	226.418	191.322	206.504	253.087	324.628	564.192	205.719	192.141	369.244	267.46	216.262	230.344	419.336	379.875	265.394	321.06	1315.07	108.081	688.99	268.071	209.469	728.655	221.177	325.29	286.682	318.585	742.197	319.662	268.173	290.482	289.094	263.043	395.36	212.796
MA2120.1	ZNF184	5254.64	6939.04	7014.35	7229.42	15200.1	10706.7	10387.8	10807	12521.3	10653.7	13629.3	10876.5	16031.1	13760.4	12612	10998.6	15437.4	11831	11965.1	10074.8	12355.8	10024.8	11408	12065.6	9103.14	10013.5	11832.6	9268.43	8171.35	13025.1	10007.2	4169.19	9877.1	11747.2	11402.4	11636.7	11360.2	10566.4	11608.6	10217.8	9974.2	12117.7	10339.4	10592.7	8706.49	15038.2	9488.63	12746.9
MA2121.1	ZNF213	38692.7	52291.4	35330.8	61643.2	26179	68426	72902	74802.8	73424.7	70496.5	41632.6	49611.8	41555.5	67984.6	88579.5	35551.3	41866.1	37166.3	47513.7	74659.4	67116.1	66725.8	104852	117652	114709	81763.5	111425	87551.6	106225	110179	48776.2	33727.3	65955.9	81501.2	82022	51274.5	123239	81163.3	107460	88347.2	63960.1	84707.5	112291	86556.3	109907	69281.1	91952.7	88135
MA2122.1	Ebf4	20025.4	23350	36337.6	75894.5	32461.2	61630.6	50588	45783.7	37633.8	74540.4	20007.7	49626.8	24001.6	45505.3	48959.5	31864.6	24563.9	22010.8	40826	47489.2	35396.3	39905.4	65596.2	51166.6	55888.2	58274.9	66908.1	75899.2	55972.4	64124.8	28909.1	24839.6	35846.4	64608.9	61150.6	39308.6	63976.1	49318	65381.1	42685.7	34716.2	65807.7	68461	45259.2	64787.8	46273.2	66906.1	58218.4
MA2123.1	Hand1	32607.5	16469.9	113447	14900.1	12386	23114.4	18821.9	21669.5	23214.1	22905.5	11251.6	10766.9	9617.46	27658.2	22869.4	10019.2	9475.25	10465.6	14950.3	19519.5	15927.7	15894.8	18888.5	16207.3	16359.3	34169.2	18610.8	21107.6	22029.9	21105.4	17836.3	8288.81	16778	21796.1	19755.1	20090.1	14413	16948.3	21960.6	17729.9	18041.1	22240.8	22145.5	17757.3	20392.3	16792.8	21814.8	23553.6
MA2124.1	Hmga1	596.922	1443.56	1524.88	577.864	1091.77	345.205	571.52	1040.64	548.012	332.601	526.14	536.849	558.716	561.105	566.663	951.656	535.147	813.94	869.349	917.96	432.125	317.297	429.666	403.186	368.048	406.362	483.357	372.302	1616	458.082	597.202	237.062	295.731	988.033	1182.65	367.959	298.954	309.8	483.039	309.35	568.807	1720.58	801.249	351.825	356.455	464.523	1643.57	897.08
MA2125.1	Zfp809	24712.6	16799.6	21179.7	29664.5	39406.3	57389.5	51294	57062.3	54847.8	58513.3	45679.3	33573.6	29570.5	57756.3	53678.4	61802.1	31349.6	29006.6	38946.9	54961.8	50109.2	44416.3	49648.2	45120.9	46077.2	50695.3	48148.4	54184.5	65262.3	72284.3	47017.4	31279.1	45599.2	87025.4	73625	54368.3	47660	50904.6	79901.7	53203.6	47416.1	78731.1	72246.5	48064.8	46618.4	46645.4	68949.6	85710.8
MA2126.1	Zfp961	15085.7	10538	10978.9	10991.7	11115.9	16523.2	20537.3	18758.5	9744.23	15287.9	7225.08	9247.25	8951.62	16292.2	10351.5	16948.4	8274.01	14922.8	12383.9	20557.3	20567.3	13818.3	19611.9	33063.2	18375.5	11369.4	22224.8	14398.6	16746.7	15193.3	14559.9	4747.81	16521.6	10286.3	10115.7	10995.2	46729.1	17229.3	13919.8	18417.9	19669.3	10523.8	16648	17811.4	18096.4	15071.8	14408	11486.8
MA2323.1	Pgr	427.361	832.366	591.474	944.72	605.337	892.443	778.486	901.917	763.516	880.736	537.641	898.07	440.643	1009.24	742.354	1049.8	469.67	887.367	832.15	919.158	750.472	902.533	820.729	818.347	769.677	1047.41	741.041	1072.74	820.895	881.237	838.537	419.188	630.788	1120.15	1141.02	2142.39	1074.29	980.297	1176.18	794.153	1008.63	972.244	984.392	1158.32	777.465	926.247	727.462	1295.55
MA2324.1	BCL11A	13706.7	10332.1	18995.8	15948.2	11683.4	23331.9	18379.2	21029.5	20296.2	26104.9	8311.87	10306	7279.13	17977.8	23126.8	11443.7	8664.35	12227.9	14927.9	19884.9	11064	13018	17107.7	10965.8	13875.7	17480.1	16573.4	15760.4	23896.2	20062.9	23276.6	8671.57	23129.9	21522.3	20237.8	29005.8	9641.86	21334.2	18864	18951.2	27480.3	20869.4	19499.8	16709	15272.8	12405	24087.6	19387.4
MA2325.1	EPAS1	1918.8	2335.53	2538.29	2787.75	1073.75	1915.86	2211.2	2635.28	2310.84	1954.32	1421.73	1444.88	2471.01	3074.59	2015.49	1486.96	1478.27	2009.07	2639.56	2592.97	3723.63	2355.05	4563.52	5193.51	4197.63	2944.49	4761.55	3191.7	1969.5	2943.28	2775.35	972.731	3838.21	2171.37	2555.26	3720.74	6579.41	4921.4	2823.62	4834.17	4007.02	2468.91	3105.25	2962.55	3901.36	3534.29	2358.6	2127.96
MA2326.1	IKZF2	0	0	0	0	0	0	0	0	0	0	0	0	0	0	0	0	0	0	0	0	0	0	0	0	0	0	0	0	0	0	0	0	0	0	0	0	0	0	0	0	0	0	0	0	0	0	0	0
MA2327.1	PGR	1920.53	2315	2654.49	2392.01	810.719	2315.16	1615.4	1850.81	2151.46	2337.74	701.52	642.724	489.333	1890.04	1408	1399.73	475.966	1231.07	1481.41	1770.44	1073.42	1240.98	1745.52	1405.16	1364.73	2112.21	1398.85	2001.6	1867.43	2071.44	1456.19	886.146	1274.16	2424.13	2258.62	1650.97	1706.22	1478.19	2049.97	1689.88	1433.65	1867.89	2253.31	1670.72	1981.55	1751.75	1667.29	2399.17
MA2328.1	ZBED4	52340.5	57416.7	53800.8	44259.1	88878.2	88794.7	147918	123406	67092.7	91774.9	72784.2	73199.5	96240.3	90031.7	106211	122412	106331	156656	71098.2	132466	147349	121747	149294	183597	217096	82280.7	176697	107265	194302	170286	123925	34697.6	160966	55940.6	97931.2	76208.6	225992	166546	140136	201622	168236	76863.2	161908	174791	171049	99108.5	142863	80244.8
MA2329.1	ZBTB11	16321.1	3410.25	6349.54	4708.71	6199.3	9120.1	9410.54	10013.3	7444.73	8508.33	5313.15	4611.17	4954.19	8990.8	7758.22	5587.01	5258.29	6706.81	7845.5	9536.56	9460.77	8339.62	5063.68	6373.13	4690.6	4682.94	5099.26	6054.01	6172.83	6277.47	6196.99	2291.2	5738.44	5386.31	7038.67	5904.28	6564.83	6543.43	6224.52	7445.18	6620.57	5826.1	6277.54	6147.02	5282.27	5602.26	5271.84	5349.1
MA2330.2	ZBTB24	13533.7	6399.36	28169.8	7876.46	7064.06	17458.6	15187.1	14883.6	16541.9	17634.7	8503.06	9500.11	7465.37	15170	28578.8	9305.41	8063.72	8122.22	12777.6	15105	12627	12919.3	15358.9	14544.6	14849.5	15085.4	15544.2	16569.3	20177.5	21276	13608.8	6227.51	13644.5	18039.3	18538.6	14205.1	15552.9	13502.9	17556.3	13576.8	13993.9	18001.2	16674.2	15458.7	16295.9	15777	19580.5	16902.7
MA2331.1	ZNF157	961.996	6485.44	1786.8	1737.97	814.322	1162.88	1128.23	1110.66	1878.64	1062.24	806.461	880.631	816.772	1938.79	1389.44	872.351	958.228	1102.96	1400.46	988.634	982.624	2989.64	884.507	942.097	918.777	1158.24	902.693	898.573	760.725	744.216	1059.42	444.865	995.732	1012.92	811.854	1038.51	748.599	1037.83	991.604	1078.11	964.222	1115.13	891.185	1024.8	1170.41	1054.97	754.572	1066.06
MA2332.1	ZNF175	5514.17	3648.64	10692.7	7219.79	5257.06	9381	7726.84	8509.93	8789.69	9130.43	5058.71	4411.88	4691.26	9134.71	7515.09	6459.36	4925.87	7472.32	6493.08	7873.53	9395.27	5702.53	5214.73	5425.04	3836.3	5473.93	5833.89	5685.5	4398.88	4778.29	5335.96	1982.48	4782.03	5514.6	7478.43	5444.33	6020.39	5662.71	5458.73	5946.91	5404.72	5235.39	5268.62	5133.04	4715.31	6089.17	4062.04	5551.46
MA2333.1	ZNF35	307.977	477.435	424.795	888.684	380.137	237.03	341.513	244.204	176.104	256.371	301.884	249.118	283.618	251.724	204.766	456.002	323.607	503.05	359.416	212.82	363.169	86.3753	120.844	153.69	123.578	136.903	113.637	114.846	180.511	126.275	245.425	65.6847	108.54	224.031	202.964	215.449	111.804	137.197	121.742	115.429	192.422	220.964	196.224	124.492	167.001	190.286	195.421	269.124
MA2334.1	ZNF547	711.116	1474.02	936.263	1590	1284.54	1479.45	1722.79	1393.43	2513.22	1474.7	1269.35	1169.61	1045.61	1424.09	1248.39	1186.6	1057.7	1390.42	1444.55	1333.22	1414.75	990.672	1238.65	1313.35	1164.59	1240.82	1166.78	1077.78	898.257	1012.89	1057.37	423.965	904.496	1459.07	1007.01	1157.13	1268.73	1270.18	1087.82	1242.02	1027.66	1199.1	1093.95	1077.13	1007.62	1362.79	865.273	1487.48
MA2335.1	ZNF558	147.068	196.007	207.635	76.1729	117.104	75.8285	71.1829	63.8211	87.7536	80.3144	70.4395	63.525	99.8141	62.8137	72.3795	131.844	80.5869	120.294	102.813	61.4902	86.1951	74.0359	70.492	59.879	76.5647	97.7876	64.0208	84.5568	58.0214	56.4207	77.718	28.6624	51.9102	84.2508	66.3535	104.094	46.1798	86.3015	84.4336	64.6403	95.1535	107.536	104.653	97.4286	53.3279	75.5549	85.8495	102.225
MA2336.1	ZSCAN21	2531.3	986.656	410.032	830.022	592.726	1306.05	1085.02	1120.42	1773.58	1177.49	652.644	703.758	665.833	1950.51	1001.56	962.56	712.69	735.827	869.177	1112.81	840.115	1032.98	835.834	864.254	805.945	947.453	816.265	855.664	671.544	741.529	873.305	332.603	797.53	898.037	746.802	999.782	724.294	1053.32	783.465	1149.67	1036.12	1000.23	752.193	1001.35	818.163	1138.92	567.059	890.821
MA2337.1	Nr1h3	0	0	0	0	0	0	0	0	0	0	0	0	0	0	0	0	0	0	0	0	0	0	0	0	0	0	0	0	0	0	0	0	0	0	0	0	0	0	0	0	0	0	0	0	0	0	0	0
MA2338.1	Ppara	1885.93	1352.18	1018.17	729.334	1787.18	826.69	775.194	824.356	2608.73	776.826	1323.98	2210.92	1279.33	814.703	1036.2	1143.97	1193.69	1862.22	909.303	767.828	1102.15	884.906	897.934	864.254	878.48	1036.55	782.654	1369.32	936.938	1007.51	1012.38	431.728	1127.87	1102.92	1946.37	1338.69	782.627	1152.9	1134.94	1022.7	1391.36	1288.96	1329.42	840.773	954.289	1018.59	1009.86	1224.62
MA2339.1	Nanog	500.03	468.827	847.208	650.534	587.321	909.942	556.296	786.684	1101.99	991.905	557.766	407.308	361.522	759.39	690.389	440.141	370.196	892.054	677.155	751.458	1119.39	370.18	278.611	379.234	311.632	404.189	296.096	379.875	261.096	272.7	359.957	120.621	330.338	396.362	271.919	355.855	269.788	380.612	382.897	408.619	389.072	366.801	336.852	445.646	304.531	470.119	212.365	444.368
MA2340.1	Zbtb2	15258.7	3107.63	9107.85	4183.38	5487.67	7046.22	7870.85	7932.43	5160.75	6771.82	4575.7	4157.78	4912.8	6983.1	7621.5	4691.86	4533.01	5958.48	7274.08	7405.97	7392.09	8274.4	5703.14	6313.25	6019.06	4191.83	6517.32	5713.26	6664.94	6907.5	6192.9	2392.71	5494.62	4331.26	4675.97	5347.5	6615.87	6145.11	6854.83	7068.88	5965.07	5325.24	6844.96	6399.62	5409.98	5302.84	7165.05	4285.12
MA2341.1	FEZF2	43025.1	55081.9	47147	91573.9	52590.4	112415	102249	114708	129862	114334	53745.4	56929.6	47742.8	104416	108622	100734	50227	52714	60742.5	109248	80787.8	83895.1	121674	93477.2	104997	108790	119479	111894	123088	114275	83360.8	50414.2	83751.6	136159	110826	94722.7	88908.3	107096	130621	111128	87198.7	129887	119355	97692	103229	89336.7	104515	135528
MA2457.1	ZNF260	316.628	628.414	405.269	527.082	340.502	345.205	248.111	356.335	535.476	326.249	247.257	199.294	185.021	329.069	321.687	791.064	188.875	357.759	333.411	295.472	321.795	297.906	223.225	237.52	2210.97	286.844	211.269	323.083	194.479	249.863	1664.8	105.693	1039.78	287.219	323.961	912.634	243.052	593.046	235.629	355.522	1086.86	265.157	255.092	331.979	234.362	313.413	206.717	367.177
MA2458.1	ZNF146	224.927	297.321	464.322	414.136	340.502	205.214	154.298	205.646	242.367	155.637	297.571	292.713	309.18	160.784	218.376	509.532	261.907	332.763	272.102	176.485	326.392	137.495	92.311	153.69	112.832	178.191	97.6317	135.038	83.8087	99.4079	435.63	49.5621	220.225	135.95	131.406	263.865	102.082	137.197	127.632	113.121	253.743	170.879	155.344	151.556	120.69	179.093	93.7567	181.502
MA2462.1	ZNF250	700.735	2318.31	1796.81	519.202	990.879	518.603	912.211	500.375	713.371	447.855	589.392	777.248	553.847	439.227	632.238	939.76	533.888	1006.1	547.132	457.583	610.261	823.209	570.65	850.282	780.423	817.07	526.571	590.635	551.203	581.67	546.072	318.272	418.428	773.576	660.933	459.948	459.368	480.19	667.614	397.076	463.08	718.871	806.155	938.201	780.272	957.029	668.722	813.631
MA2469.1	FOXM1	3581.53	821.109	781.013	467.544	556.694	509.589	420.925	395.78	549.803	473.719	317.697	257.837	371.26	337.975	398.397	582.889	289.609	490.551	656.834	356.563	360.87	408.961	318.892	413.165	326.408	465.034	318.503	354.634	279.362	318.374	496.986	132.564	1278.88	382.958	333.068	801.278	549.297	440.359	349.516	554.06	759.114	346.178	469.303	409.561	467.321	391.766	316.288	337.97
MA2470.1	ZBTB48	11369.2	5444.49	5784.26	3750.86	5444.43	9438.79	6780.48	8076.03	6441.83	9189.87	4411.82	5283.79	4879.94	7828.75	8900.82	4491.62	4313.92	4466.52	9866.46	7748.16	4882.09	4941.02	5741.74	4592.72	5235.95	8868.25	5552.2	12161	11213.2	8323.39	4151.78	4889.93	4264.5	11741.5	10274.4	5805.03	4566.94	4686.84	9458.53	5404.39	5055.82	10989.3	9130.97	5452.39	7738.17	5798.14	10749.3	12027.1
MA2484.1	Dmrtb1	565.778	859.516	1995.39	8824.68	626.956	314.45	390.477	540.707	761.725	274.067	287.508	265.31	255.621	306.1	305.602	322.175	254.352	379.631	429.852	1477.76	275.824	280.279	177.909	183.629	214.919	202.094	177.658	196.879	141.83	184.039	249.516	77.0302	195.057	204.883	204.265	290.494	155.553	199.157	251.337	186.995	300.262	184.137	189.684	230.942	165.597	316.211	150.237	154.381
MA2485.1	Duxbl1	501.76	483.395	558.615	415.011	830.536	446.487	306.95	394.893	367.729	447.855	1355.6	398.589	1834.39	441.571	368.084	411.393	3878.24	409.314	689.211	370.937	395.348	431.876	251.757	245.504	228.351	252.075	219.271	297.842	479.214	362.704	1002.15	160.032	700.001	551.46	312.252	472.052	192.011	340.78	565.509	286.264	554.005	502.326	416.977	378.889	221.732	285.43	542.207	632.128
MA2486.1	Fosb	489.649	788	620.048	832.649	637.765	1041.98	791.241	996.319	914.548	1109.88	323.447	367.449	995.707	787.515	804.217	547.202	292.127	729.578	771.53	857.668	473.498	611.678	483.374	532.923	494.313	643.225	468.952	641.117	581.288	603.164	558.343	282.444	498.653	674.007	685.652	573.725	486.103	551.002	624.416	706.427	575.15	679.098	760.369	535.857	613.271	450.531	528.652	684.284
MA2487.1	ZBTB21	0	0	0	0	0	0	0	0	0	0	0	0	0	0	0	0	0	0	0	0	0	0	0	0	0	0	0	0	0	0	0	0	0	0	0	0	0	0	0	0	0	0	0	0	0	0	0	0
MA2488.1	ZBTB40	235.308	602.588	602.904	1567.24	500.844	199.912	174.46	202.1	183.865	176.964	435.575	247.872	307.963	366.57	212.808	578.924	308.497	342.136	255.914	188.863	189.629	142.784	241.687	181.633	188.054	219.479	238.477	175.424	168.692	130.305	188.16	57.922	166.742	235.519	134.008	174.296	126.387	139.41	192.43	136.206	177.62	190.03	199.495	212.899	138.933	268.64	160.403	173.157
MA2489.1	ZFP28	1536.43	7609.83	3017.38	978.866	3051.91	1116.22	1032.36	955.544	1383.76	1009.15	3429.97	1689.02	3837.97	1152.68	1120.34	2623.99	4170.37	2932.37	1121.65	1207.44	1991.68	1976.05	2373.23	2632.68	2381.57	2231.73	2395.98	2047.03	1733.12	1409.17	1785.47	1593.15	1412.59	2314.98	1597.69	1600.14	1844.76	1818.97	1773.11	1537.52	1943.25	2037.29	1661.37	3406.39	1640.54	3511.9	1842.38	2175.94
MA2490.1	ZFP3	2813.32	2136.87	2924.51	4791.01	2974.44	5853.11	4457.78	5122.09	3775.2	5364.73	2875.08	2803.82	2441.79	6763.26	3739.61	2498.1	2796.62	3069.85	4303.35	4743.93	2011.22	2104.74	2072.8	2045.87	2107.55	2851.05	2050.27	2382.73	2474.51	2431.46	2298.82	975.119	1788.54	2971.76	2667.15	2582.97	2044.07	2270.39	2662.6	2267.03	2042.63	2916.73	2493.68	2359.94	2335.2	2568.87	2077.33	3091.8
MA2491.1	ZNF134	3642.09	3359.26	4460.34	4371.63	2666.36	5221.03	4974.16	5485.51	6388.1	6338.03	3089.28	3161.3	3553.14	4571.81	6258.66	3999.93	3509.31	4038.46	5109.15	4950.76	4428.13	4311.71	4472.89	3680.57	3417.21	4280.92	4468.65	4409.57	4037.86	3965.57	3507.54	1692.28	3394.61	5026.33	4820.38	3865.99	3252.03	4485.47	4518.18	4231.63	3704.64	4867.11	4465.74	3507.43	3843.82	3858.9	3600.03	5242.7
MA2492.1	ZNF18	14857.3	4898.18	6507.17	6771.51	4397.7	6433.76	6676.38	6071.87	7071.63	6512.27	5189.53	7828.53	5355.88	6864.98	6022.96	4798.92	4789.88	5130.48	6478.79	5942.98	8047.18	5981.05	5802.17	4806.29	5163.42	6675.63	5267.31	7377.89	6907.77	7788.74	6845.32	3486.66	7371.25	8752.51	7646.26	7119.51	4926.66	6120.77	8598.48	6741.06	6127.89	7917.9	8594.63	7177.24	6469.52	5333.62	7507.31	9162.73
MA2493.1	ZNF322	3334.11	7639.63	5039.91	6224.29	2630.33	8018.73	7118.29	7354.06	10275.5	8054.13	3480.29	3526.26	2747.32	9113.15	16556.3	3873.04	2970.38	4952.38	5964.55	7082.95	5984.24	6368.85	8803.11	7790.26	6481.14	7838.22	8428.34	6915.99	6825.04	10685	3755.01	3211.98	4371.47	8808.04	7434.19	5119.95	7257.53	6417.29	7974.07	6030.02	4398.21	8356.88	7618.41	6489.83	7009.82	7093.77	5776.77	8695.42
MA2494.1	ZNF436	39564.7	27133.7	28423.6	26395.2	32272	42667.1	42316	43160.8	34075.9	49209.6	28346.9	32233.4	35966	47663.9	38468.8	46175.1	34173.9	32359.2	41282	44662.6	45219.1	29982.8	44490.5	37713.8	41452.4	48285.3	45438.8	45423.4	36998.3	36751.4	29007.2	10784.8	34632	29608.4	32113.8	32114.1	42820.9	35616	32361.6	38343.3	32942.1	30359.1	32578.1	32395	50504.4	36011.7	27736.2	29027.8
MA2495.1	ZNF490	2000.12	2500.41	3266.44	2160.86	1392.63	3646.66	3134.1	3206.13	4636.61	3561.97	1726.49	1971.77	1610.42	3513.35	4276.58	2924.36	1639.44	2740.21	2955.41	3039.37	3964.97	2529.56	2923.74	2642.66	2450.07	3313.91	2792.91	3062.97	2288.62	2915.07	2769.22	1238.46	3193.26	3337.48	2619.01	3422.98	2440.24	2980.72	3430.36	3331.29	2778.48	2912.31	2979.34	2619.75	2726.74	2899.07	2250.16	3534.08
MA2496.1	ZNF596	17912.8	28225	37965.8	14015.8	40292.7	21019.3	20069.9	22839.5	16707.8	22894.6	64583	49158.4	68401.9	22535.6	14383.7	35129	70770.4	45888.4	23783.6	23311.2	32815.1	18568.9	21031.8	32059.2	25837.2	19918.2	21967.1	20554.9	19656.4	23402.5	16705.3	8928.94	19091.9	16721.9	21440	16972.1	30921	22170.6	23411.7	22686.5	19521.3	19142.9	22905.9	20423.9	22702.3	28772.4	20514.6	18596.7
MA2497.1	ZNF623	6673.41	8750.11	13083.9	40896.1	11681.6	20273.3	17629.9	19255.4	19080.1	20124	7695.16	11351.1	7876.8	17682.5	19157.7	9227.1	8365.92	8314.38	12939.3	19248	13079.8	12173.6	16542.1	16542.6	14310.9	14270.5	16643.8	14788.6	13084.9	13867.4	8898.72	5454.82	9740.24	15967.4	16735.4	11053.3	17037.9	14673.5	14885.8	12935	9984.78	15321.7	15153.4	14325.6	14940.2	14506.5	12631.2	16166.2
MA2503.1	Banp	550.206	197.331	1413.44	327.456	1145.82	1060.54	1077.21	1001.64	722.326	1025.48	793.523	946.648	1412	926.268	802.979	2133.3	2062.52	877.993	620.668	1044.53	1958.35	1656.99	1916.71	4594.72	2635.44	1934.02	2410.38	1466.49	2555.09	2345.49	1333.48	661.624	1812.14	1171.85	1608.1	987.678	5857.55	2319.08	2277.74	2594.85	1894.61	1673.44	2622.86	2345.5	2694.46	2104.34	2200.46	1063.98
MA2504.1	BCL11A	2276.95	2001.79	762.44	988.497	1909.69	1184.62	908.507	1007.4	1254.82	1066.32	872.588	884.368	804.599	1011.58	1053.52	997.256	1028.74	863.933	1658.1	911.971	925.161	1380.24	1033.88	688.609	659.531	1001.78	968.314	1371.84	905.779	873.177	1026.7	319.466	821.125	1041.65	1061.66	997.361	760.752	898.421	816.846	819.547	877.527	1144.6	1100.49	1358.59	884.121	971.02	980.492	1178.72
MA2506.1	MYT1	468.887	1346.22	331.93	550.721	1005.29	1341.05	783.423	1025.57	530.103	1238.75	861.087	572.971	1096.74	845.173	871.647	1096.39	1455.6	790.506	578.303	994.623	1431.99	336.687	575.685	532.923	476.851	460.688	561.783	528.795	540.459	384.198	462.218	194.666	327.192	631.881	478.786	740.759	367.008	449.211	518.383	387.842	560.348	791.053	634.459	375.281	418.203	643.616	617.891	602.921
MA2507.1	NACC2	160.909	751.58	324.311	253.034	208.985	120.371	120.147	124.54	269.23	96.6495	487.327	427.237	370.043	122.346	110.734	130.853	407.971	81.2378	215.615	113.397	273.526	98.7146	100.703	149.698	122.235	147.768	96.0312	166.589	64.4682	49.7039	116.577	44.785	110.113	109.143	81.966	167.034	157.984	272.182	54.98	87.7262	186.078	76.601	81.7601	135.317	211.908	181.891	41.7952	100.139
MA2508.1	CASZ1	3906.81	8950.09	4162.7	3692.2	5768.71	4271.32	17601.5	4407.2	2446.95	3679.94	5459.78	5473.12	5610.28	2633.49	3759.4	4173.41	5128.6	3360.43	3118.15	4454.44	2445.64	5103.19	9271.38	4057.8	4626.12	4324.39	9111.76	8536.45	52279.4	16781.1	20918.4	6207.2	22798	31123	26300.7	13079.5	4895.06	5105.07	9103.12	3929.21	24839.3	62594.8	26805.9	9824.05	6621.09	4077.17	98130.5	23601.5
MA2509.1	ZBTB5	2565.9	3599.64	6019.51	2171.37	6826.25	4842.95	4827.68	4943.92	4411.56	5345.67	2788.83	4649.78	4502.59	3952.58	4766.53	2935.26	3429.98	2949.56	7289.93	4653.29	3639.73	4124.86	3600.13	3934.05	4439.41	3954.97	3572.36	4940.89	7205.4	7420.66	4237.68	3325.44	3385.18	8013.4	6913.77	4381.61	4861.04	5667.13	8631.86	3816.09	4271.34	7707.24	7883.31	4588.17	4255.01	3464.33	8012.24	8645.35
MA2510.1	ZBTB41	625346	176590	189303	244668	435927	244199	150731	142713	203990	127990	438390	387688	308174	209824	237769	404234	602019	423118	60803.6	158649	486662	525720	662409	451897	364036	424924	710224	512203	479810	550377	660053	3120.02	398697	343998	430292	413581	435661	467732	397288	505806	596257	373878	426371	592950	614616	472898	562929	311662
MA2511.1	ZNF335	15445.6	15636.8	25067.2	12978.3	13389.5	22430.9	15804.2	17792.4	17807.4	20465.2	10777.2	16433.1	11840.1	14123.7	19763.9	12118.7	12543.9	10170.3	15572	18702.2	17075.8	60741.2	18779.4	15428.8	17554.8	14453	19934.5	19865.8	18806.5	17283.5	42321.6	5027.87	32750.6	14638.6	19864.4	28988.8	15375.5	19121.3	14177	16534.1	32373.3	15551.5	14384.9	17863.7	17970.1	15709.8	19762.3	13207.9
MA2512.1	ZNF648	120746	217907	184350	142564	231257	207513	104449	114527	237950	209175	296631	263169	316368	121599	210958	237208	327019	241354	38809.2	113168	226359	185786	199937	214509	190544	217512	204940	175251	157958	171086	184824	69810.3	225476	149381	164205	174577	156669	169352	150985	179218	182982	139464	144027	194956	195152	248721	166171	140892
MA2513.1	FLYWCH1	252.611	458.232	492.895	276.674	621.551	205.214	183.1	195.452	290.721	189.215	1006.28	702.512	1124.73	283.599	319.212	399.497	1060.22	746.763	339.955	168.898	526.365	319.06	352.46	317.359	264.618	262.94	345.712	391.233	341.682	322.404	850.808	155.255	446.743	482.527	395.519	566.462	313.537	668.284	335.771	424.779	693.563	422.779	315.594	516.011	276.463	545.674	368.249	450.626
MA2514.1	ZNF853	745.72	623.116	982.457	685.556	826.933	1365.97	1821.95	1830.43	765.307	1282.76	968.903	807.142	2719.33	1199.55	880.308	1890.42	1257.91	1192.01	1353.45	1743.69	1866.41	1166.95	1495.44	2249.46	1348.61	1127.82	1542.9	937.697	1198.03	991.392	1006.24	290.804	1219.1	714.217	819.66	1396.79	2639.54	1783.56	942.514	1689.88	1374.44	958.986	925.525	1293.64	1430.03	1553.07	772.646	709.319
MA2515.1	ZNF865	11910.8	22997	16762.2	10272.8	12560.7	15653.6	17107.8	17570.8	16545.4	15784.7	10603.3	11006	12717.8	16152	10608.9	9787.19	12382.7	15871.1	16386.1	17719.1	20937.4	10373.8	13913.8	15147.4	14012.7	12801.5	13335.5	12922	9199.62	12915	10798.7	4288.02	11344.7	10163.7	10973	10528	13715.4	12870	11331.8	13870	10532.4	9283.46	11578.9	12055.9	13722.1	12917.1	9004.03	10449.9
MA2516.1	ZSCAN2	4138.66	2367.97	3034.04	5846.93	3206.84	4856.74	3890.78	4521.11	5217.46	5035.76	2982.9	3086.57	2780.19	5446.51	4461.55	2316.69	3063.56	2493.38	5508.52	4168.55	3378.85	3606.61	3781.39	3097.74	3312.43	3931.06	3855.65	4723.82	6750.9	5861.03	4346.07	2136.54	4410.8	5977.98	6461.01	4967.44	3235.02	4093.79	5056.2	3963.84	4586.4	5848.19	4693.03	3563.36	4075.38	3509.11	9133.94	5474.27
MA2517.1	ZSCAN25	79994.5	115815	140648	111515	127157	152527	144314	156859	169736	154508	151346	152768	155972	165478	134523	124763	155813	121402	77537.4	153831	127866	122521	132889	127115	129539	136051	130244	132369	102566	114232	118745	46090.4	122412	129785	119549	129250	105103	119886	123265	125294	120428	118265	116258	124378	125673	148955	99046.6	126880
MA2518.1	ZNF551	2558.98	5637.84	4850.37	3271.06	3253.68	3228.28	3309.8	2978.32	2631.41	2975.72	2784.52	3049.2	2467.36	2899.27	2462.76	4967.45	2757.58	1896.59	3112.81	3009.42	1810.1	3321.04	2960.67	2379.19	3887.34	4041.89	2988.17	4178.62	11312	5850.29	8362.87	1760.35	4360.46	6267.11	5027.25	3321.31	1681.92	2305.8	4372.87	2006.16	5062.17	9276.09	6619.3	6049.59	3356.85	2571.67	13201.6	5993.75
MA2519.1	ZNF606	7820.54	11447.9	12722.9	10508.4	16241.4	17284.1	15295.3	16193.3	13358.2	18737.3	15535.5	13479.8	16709.1	18183.2	14745.6	33774.9	16749.5	14388.5	16802.3	16338	15793.2	15672.7	20862.3	21153.3	19485.1	20344.2	20834	27674	19295.3	19240.8	15470	7080.81	18590.2	17604.6	18066.4	20642	23515.3	21411.6	20721.6	18097	18755.8	18807	21377	16561.1	20480.7	18474.6	20833.2	16775.4
MA2520.1	ZNF678	15826.2	9416.27	9857.9	27247.1	15909.9	17127.7	14725.8	16099.8	18543.5	17607	15118.6	15674.5	14882	18516	20968.4	12104.9	15932.3	15982	18962.1	17162.1	12718.9	10897.4	11752	11015.7	11496.8	13070.9	11307.7	13158	9571.38	11011.4	11929.7	4436.7	12285.4	12564.9	14746.1	13423.2	10587.3	14407.9	11840.3	14763.4	12063.4	12839.5	12051.4	11797.9	11699.9	14948.7	10017.3	12323.4
MA2521.1	FIZ1	1344.37	3302.98	2093.49	1243.28	1392.63	2692.71	2016.16	2220	1964.61	2701.65	1164.41	1138.47	1533.73	2180.2	2042.71	1740.74	1411.53	1631.01	1971.19	2244.39	2021.56	1567.09	1705.24	1417.14	1332.5	1460.3	1730.16	1761.81	2071.58	2113.09	1364.16	957.802	1011.46	2223.07	1943.77	1677.6	1339.22	1460.49	2012.66	1382.84	1505.54	2398.2	2259.85	1708.61	1292.5	1320.81	2005.04	2334.49
MA2522.1	ZNF683	15044.2	25642.5	38533.9	31566.2	42409.6	23180.2	19977.3	21231.2	26221.6	21967.6	64013.7	45612.2	66466.5	31361.9	19602.5	31953.8	68273.5	37246	29396	20037.8	29111	27666.5	26219.7	26027.4	20749	25902.9	26634.3	22998.2	20195.7	26418.3	26851.6	14319.3	25854.4	28892.3	25883.1	26563.2	23464.2	30176.8	25822.9	23462.1	26748.7	26894.3	22318.9	24727	22149.3	34111.6	24566.5	28001.4
MA2523.1	ZNF689	666.13	593.318	845.779	949.973	589.122	1126.29	918.383	1115.1	465.034	990.544	628.206	885.614	606.188	416.727	1138.28	729.603	611.957	560.853	628.246	1118.4	628.65	380.756	335.676	435.121	380.137	338.997	291.295	401.329	226.713	300.91	629.925	105.096	391.686	516.994	244.597	433.32	359.717	404.953	274.9	408.619	441.935	341.759	287.796	413.17	293.304	531.683	216.883	617.525
MA2524.1	ZNF696	6808.37	2957.98	4596.07	5473.94	6509.17	5605.48	5687.63	5602.08	6406.01	5357.92	5258.53	4018.27	5762.44	6293.56	4923.04	4287.41	4929.65	4115.01	5224.36	5590.81	4381.01	6837.75	4788.42	4043.83	4370.91	5556.51	4718.33	7567.2	3926.12	4466.64	5753.18	1770.5	5450.57	5076.11	5906.76	6497.37	3791.61	4078.3	4696.86	4811.09	5184.81	4702.13	4423.22	5221.45	4647.95	4513.71	3972.8	4992.35
MA2525.1	ZNF699	10907.2	10118.8	14978.8	10321	13135.4	17433.1	15838.4	15555.1	19133.9	16757.6	13876.6	14288.2	14079.9	18914	14780.9	13523.4	14464.1	13980.7	22920.3	15459.2	13672.8	17068.8	14813.4	14375	14445.2	17206.3	14505.5	18249.1	12711	13652.5	14525.1	6063.89	13224.5	17348	13811.9	16262.8	14165.1	14202.1	16219.1	14839.6	14374.5	15451.3	14749.5	16949	16057.3	18667.7	12897.8	17526.4
MA2526.1	ZNF721	1171.35	5537.85	1041.99	851.035	2376.31	1100.31	794.121	1098.7	1263.17	917.49	2005.37	3358.11	2012.11	1973.48	966.297	1586.09	2033.56	1324.8	1174.52	1071.69	1137.78	1068.23	1216.83	1385.2	1020.86	1214.74	1110.76	1231.75	1041.16	1038.41	828.311	404.857	715.732	1332.7	2086.88	1072.41	1037.83	953.742	1219.38	844.942	1053.03	1247.71	1375.21	1138.47	1277.06	1631.43	1010.99	1331.02
MA2527.1	ZNF726	915.28	1183.32	1305.34	1129.46	1498.93	1768.98	990.8	1576.47	1291.23	1945.7	1480.67	1074.94	1968.29	1855.82	1097.45	1399.73	1420.34	1370.11	1176.41	1621.9	1400.96	1177.52	1151.37	1329.31	1135.04	1423.35	1070.75	1169.91	1527.9	1265.44	1216.9	692.675	1653.26	2468.17	1653.63	1319.33	974.638	1263.54	1563	1209.7	1294.09	2902	1540.36	1201.62	1188.65	1553.07	1523.83	2338.67
MA2528.1	ZNF732	10073.3	23493	16332.7	18788.4	11128.5	21323.7	22080.7	22066.2	22595.7	22269.8	7476.65	9562.39	7885.32	22282.5	24844.1	12156.4	8694.57	11762.3	15283.5	20746.1	16092.1	18357.4	20813.6	20348.9	19083.4	22115.2	20890	28130.9	28677.6	26112	13492.3	13131.6	16276.2	27268.5	23793.6	16153.9	25408.6	20641.6	26486.6	20283.2	15973.1	25537.6	26622.7	19565.1	21680.6	17377.6	23118.4	26013.2
MA2529.1	ZNF772	401.408	313.876	332.407	447.406	243.216	423.155	307.362	376.279	524.134	373.893	340.697	220.469	226.408	282.193	368.084	350.923	236.724	267.147	426.58	379.322	244.794	135.733	159.446	163.669	118.205	178.191	140.846	147.659	89.181	124.931	210.657	57.3248	122.697	126.376	111.89	193.662	99.6512	157.113	123.705	152.367	241.056	145.837	124.275	120.884	182.438	201.48	81.3311	127.26
MA2530.1	ZNF773	4901.68	7676.71	3623.61	6696.21	6121.83	10430.4	8102.09	8809.98	7859.62	9916.33	6545.13	8253.27	7326.6	14838.6	11869.6	28934.3	7363.63	5508.55	8326.67	8638.17	7471.39	9954.31	9192.5	8742.34	8322.72	10015.6	9174.18	10795.5	11286.2	10142.3	8021.32	4786.03	7402.71	13183.3	10559.3	8777.75	10774.5	8530.57	11106	8537.14	9386.37	12133.9	11717.9	8589.96	9279.06	9147.74	11577.3	12703.1
MA2531.1	ZNF775	34453.6	70485.6	73744.3	45773.8	89665.5	73165	68095.3	73121.3	76412.5	72469	112969	88157.8	121894	88730.5	64388.7	72557.8	126865	78911.6	84256.9	71451.2	57733.5	69955.2	71082.8	73339.9	66295.7	64737.6	68892.8	69970.1	57498.1	62112.4	65982.6	23663.2	63928.2	66431.8	73543.1	70665	62041.4	67441.3	63022.8	64924.3	67616.1	64151.9	58332.6	77627.1	61355.2	90153.8	56647.1	66936.8
MA2532.1	ZNF780B	3012.29	2063.37	1381.06	1440.28	1437.67	2358.64	2107.92	2298	1846.41	2773.8	3192.78	1183.31	1426.61	2192.86	1980.85	2112.48	1137.03	1857.53	1378.94	2005.62	2156.03	1484.24	1847.9	2309.34	1715.32	3181.36	1800.58	1698.71	1352.76	1622.77	1351.88	665.804	1351.24	1746.29	1569.06	1680.02	1531.23	1628.66	1865.39	1671.41	1416.73	1694.06	1761.11	1479.47	1828.59	2319.82	1432.33	1948.54
MA2533.1	ZNF814	24141.6	40617.1	40852.2	51506.9	66381.7	51665.2	52585.6	53353.6	53856.8	49443.7	82159.8	83556.6	87936.2	60561.8	46348.2	49987.7	88857.1	66357.2	67888.8	53577.1	45570.8	100414	46687.5	45869.3	46832.1	45840.7	46885.6	50147.2	43163.6	48180.6	44297.2	16995	42231.3	47867.9	51387.5	44452.8	41474.4	40922.4	47685.3	44163.2	42831.8	46803.2	46945	46255.1	45268.4	50451.1	44864.3	46124.5
MA2534.1	ZNF831	24776.6	13639.7	10774.6	35382.8	10584.4	16987.7	17725.8	16999.9	13828.7	17248.1	9594.15	10281.1	10877.3	16138.9	16888.5	19970.9	12300.8	9440.77	24465.8	17195.3	19529.5	11874	14984.6	15380.9	18681.8	17590.9	15038.5	17971.5	24144.4	25378.6	11408.2	10206.2	11442.3	25755.9	24821.4	12910	17769.5	15476.7	26074.3	13528.3	13875.5	25645.1	28081.3	14459.1	15362.7	13759.4	27391.6	23797.7
MA2535.1	MYPOP	2230.24	5289.53	1995.39	2490.07	1760.16	1179.32	1086.67	1164.74	946.784	1417.53	1137.1	2797.59	1021.27	1341.12	4722.61	3936.48	886.456	1526.33	1269.92	1124.79	2495.06	987.146	4153.99	1544.88	914.747	808.378	4111.74	803.92	716.672	792.576	1047.15	309.315	1233.26	691.24	538.634	1065.14	1570.11	1188.31	836.482	1091.96	1190.48	718.871	884.645	1284.61	1025.86	1094.15	652.908	669.681
MA2536.1	PRDM13	34621.5	16226.8	26994	28989.5	29234.5	41936.4	40120.8	41461.6	47296.2	43461	26982.7	46715.8	29209	46020.9	40440.3	38524.2	29411.7	31537.5	41945.4	39876	38476.3	31003.4	47048.4	37514.2	39076.2	41585.8	45101	42138.3	35301.7	33164.6	29825.3	12898.7	28975.3	33574	30091.9	34058	35684.9	39933.3	35110.6	41432.2	32741.3	32465.6	34141.4	36326.4	38137.9	35082.7	26390.8	32989.6
MA2537.1	SALL3	200.704	473.462	771.012	899.191	234.208	175.519	201.616	184.372	308.63	150.646	219.944	149.471	163.111	139.221	144.759	275.584	142.286	182.785	207.004	190.859	162.047	111.054	95.6678	139.718	100.743	93.4415	86.4281	71.9364	62.3193	57.764	196.34	23.2882	91.2361	78.5065	74.1598	234.816	87.4986	73.0244	84.4336	71.5661	112.07	70.7086	99.7474	167.794	155.774	187.488	60.9983	83.4493
MA2538.1	CGGBP1	6938.14	13066.2	15193.6	8780.02	20846.3	19084.4	33284.8	25563.5	13265.1	19715.1	20115.5	20177.3	27280.9	16081.2	23518.4	40511.8	41080.4	45977.5	18935.6	29649.8	42833.2	50168.2	60886.7	94040	100656	25859.4	77393.1	48548.2	70840.9	69859.5	48428.6	11309.7	61795.2	15682.1	36175.6	20557.3	102862	64644.3	61573.7	84757.3	74048.5	28554.5	73934.1	75059.7	75210.6	30918.7	60347.7	33548.7
MA2539.1	SLC2A4RG	24596.6	26511.2	31181.5	35261.9	32183.7	33854	63935.4	54335.7	27348.1	43321.2	31932.1	30505.7	55219.1	39214	55164.3	67216.6	41239.1	101583	43946.9	60561.4	98780.7	84332.2	114373	166530	179981	54239.5	142691	83943.4	148333	144139	83923.2	26619	107569	39546.2	77636.2	38115.2	194816	113314	130285	144508	121839	63876.4	150260	128678	143730	60326.4	123969	71678.8
MA2540.1	SP140L	0	0	0	0	0	0	0	0	0	0	0	0	0	0	0	0	0	0	0	0	0	0	0	0	0	0	0	0	0	0	0	0	0	0	0	0	0	0	0	0	0	0	0	0	0	0	0	0
MA2541.1	CREB3L3	3605.75	2734.16	3025.95	2880.56	2343.88	3740.52	6582.15	3749.93	4637.21	3680.4	2284.25	3421.63	3004.16	4751.34	4889.02	2701.31	2363.46	2630.86	4323.32	3552.45	5302.72	2973.78	6705.14	6596.67	5073.42	4609.06	6866.23	5994.7	12627.2	4828	3734.56	1678.54	5046.3	4354.24	4454.79	7136.46	10774.5	8141.11	4775.41	6604.86	7096.34	4691.81	4926.87	3568.77	6184.64	4757.16	4601.99	4441.59
MA2542.1	SCAND3	4060.8	6513.91	3240.73	4344.48	5384.97	7693.15	7895.54	7753.82	10483.9	7254.16	9496.4	18991.5	9843.86	12284.8	12499.4	6159	9793.82	4800.84	6668.05	7319.32	9967.6	6920.6	7008.92	6253.37	7351.56	8070.74	6406.88	8223.46	6951.82	6685.85	3887.95	2704.42	4179.56	8271.9	5789.66	6117.31	6591.56	5877.35	8148.82	5619.09	4886.66	7733.76	7649.48	6298.58	7610.46	6562.08	5647.99	8440.9
MA2543.1	ZBTB47	1825.37	2103.76	4920.38	3651.92	2374.51	2175.7	1818.25	1685.06	1694.18	1693.86	3290.53	1418.73	1319.49	1736.75	1748.24	2076.79	1465.67	1459.16	1930.37	1578.78	1404.41	1951.38	3165.43	1437.1	1212.95	1538.53	1951.03	1463.97	1623.52	1384.99	5139.62	760.151	2122.03	2290.09	3403.54	1929.36	1536.09	1584.41	1635.66	1521.36	1843.86	2351.06	1877.21	1928.73	2033.48	1648.22	2326.97	2288.6
MA2544.1	ZKSCAN4	178.212	279.442	600.523	865.044	230.605	243.394	200.793	207.862	349.82	511.38	232.882	462.113	191.107	225.473	202.291	264.679	231.687	196.845	288.979	192.456	237.899	349.027	261.828	177.641	202.829	243.382	254.483	263.767	356.724	288.82	607.428	211.385	240.675	354.236	418.938	363.117	174.997	314.226	231.702	244.71	444.05	431.617	277.984	247.18	262.43	277.035	455.228	463.144
MA2545.1	ZNF57	8026.44	10973.1	11513.7	10628.3	9215.17	11481.9	11200.8	11966	12568.5	11180	9783.91	8430.15	9476.26	13325.9	10104.7	9010	9465.18	7826.95	15601.6	11405.6	8235.66	10661.2	7282.5	7838.17	8643.76	8750.9	7266.36	8035.42	6587.58	6896.76	6767.6	2597.53	6952.82	7274.29	7827.11	12505.7	6003.38	8656.71	7117.95	7179.7	6341.45	7512.79	7387.85	7631.91	8157.77	8867.91	5479.68	7416.56
MA2546.1	ZNF131	327679	125291	117451	152633	284986	117360	128521	149427	85611.7	98906.5	213517	69662.1	338235	160290	174357	169492	288949	211550	68877.5	122593	325688	298878	342712	358568	572422	202214	399807	177521	277746	314540	227460	40543	348006	71513.6	142544	73107.6	447021	260485	219999	305340	329379	104481	266536	310395	431955	253389	240511	121663
MA2547.1	ZNF215	34104.1	27753.5	41442.2	40600.2	21363.3	56331.6	53989.9	62038.6	57447.6	57121.2	32117.6	49428.7	31744.5	55105.9	41119.6	46232.6	34855.1	33905.9	53741	59076.9	41729.9	45680.2	53600.8	43516.1	47080.6	46238.3	52948.4	43920.3	34313.2	39190.9	32901.3	14992.8	36170.4	38401.1	38995	36873.3	41523	45399	39831.1	45573.8	36714.5	34928.6	38751	44324.6	48644.9	41356.5	32076.1	38488.9
MA2548.1	ZNF226	2667.98	6682.11	4783.23	6859.94	3060.91	2902.16	2596.73	2273.63	1913.86	2482.94	3244.53	2731.58	3158.75	2162.39	1973.42	2699.33	3257.47	2629.29	2969.01	2333.03	3093.83	2122.36	1962.03	1872.22	1634.72	1925.33	1968.64	1903.16	3444.75	2650.43	5115.07	1478.5	2704.05	3898.52	4280.45	2580.55	1995.45	2257.12	2562.46	2084.65	3093.55	4547.45	2863.24	2421.28	1905.77	2546.48	4621.19	4193.33
MA2549.1	ZNF234	6682.07	14891.2	11592.3	10585.4	6163.26	6535.04	5487.25	4636.78	4130.99	5588.43	9561.09	7184.56	9481.12	4614	3536.7	5645.5	9990.25	5049.24	6719.54	4216.87	3784.54	3412.7	3257.74	3562.8	2840.95	3700.72	3178.63	3158.89	3861.65	3457.78	7798.39	1535.83	4031.69	4706.56	4039.75	4212.16	3196.13	3308.22	3432.32	3322.05	4233.27	5322.3	3391.41	3900.75	3380.71	4331.81	5361.08	4531.3
MA2550.1	ZNF275	19878.4	15162	18387.1	22654	9161.12	33174.2	27915.2	30744.9	29341.9	37220.5	10512.7	15048	10896.8	25957.5	30604.2	22462.1	11026.6	15539.9	23713.5	30687.2	18242.3	30501	44200.2	33121.1	32741.5	29299.3	44508.9	35844.5	32309.3	32413.7	24916.8	12661.6	24929.5	32880.8	31694.8	28441.7	40606.7	35534.1	33331.6	31339	28070.3	30843.7	30594.6	34572.7	35432.2	28876	31542.9	31262.2
MA2551.1	ZNF286B	2071.06	2483.86	2864.51	3759.62	4046.39	3054.88	2942.36	2950.4	4200.83	3127.72	1500.79	1883.33	2019.41	3446.32	3239.14	2884.71	1767.87	2648.04	2737.55	2669.63	2808.81	2471.39	3086.54	2704.54	3311.09	8046.83	2912.95	3271.21	3509.22	4380.66	2347.9	1130.37	2222.7	3174.72	2859.7	2665.28	2744.05	2982.93	2864.85	2791.08	2389.41	2809.2	2781.48	2551.19	7781.67	2731.17	2366.51	3131.43
MA2552.1	ZNF367	2548.6	3265.23	4148.42	2110.95	1794.39	3809.99	3211.05	2974.77	956.335	3937.67	1200.35	1463.57	1118.65	1228.62	1121.57	2759.8	1174.81	1273.25	1700.81	3215.06	1560.71	1448.99	970.105	960.061	771.02	823.589	1045.14	854.402	1346.31	906.761	4329.71	394.705	4185.85	1472.47	1113.7	1798.64	918.736	845.312	973.932	904.965	1659.9	1431.85	1129.92	1571.49	910.785	1077.36	1986.96	1318.5
MA2553.1	ZNF407	8114.68	4956.45	11971.9	8401.79	8572	11791.1	14407.7	13917.9	9456.49	12586.7	7833.16	8776.42	8265.1	11761.6	16488.9	9119.04	9441.26	10818.7	11778.7	16895.8	21338.5	28045.5	27866.2	37438.4	32507.8	16487	31925.6	22080.7	34878.4	26864.3	15981.3	6580.41	21792.9	12823.4	19800.7	13936.4	49115.9	23925.4	26406.1	27506.8	22984.9	16759.4	28410	25398.2	28164.2	16887.9	23286.7	16026.4
MA2554.1	ZNF471	4766.72	7999.86	9571.21	4578.26	8548.58	4824.92	3703.57	4014.08	4231.87	4598.34	15469.4	10796.8	17618.4	5088.38	3591.14	7052.17	17302.3	7300.47	3754.15	3913.81	5099.3	5751.89	5318.79	5600.69	4507.92	4791.59	4942.41	8265.11	4853.38	5307.57	6606.03	2407.64	5090.35	7324.08	6487.03	5831.66	4960.69	5328.57	5682.58	5307.43	5795.91	6242.98	5458.31	5981.03	4469.72	7298.04	5481.94	6586.24
MA2555.1	ZNF493	3159.36	5433.89	6905.29	35388.9	2614.12	6532.39	6683.37	6127.27	7539.65	7430.22	2397.82	6331.33	2316.42	6033.4	7471.79	3762.01	2329.46	2787.08	4752.14	5652.7	4262.64	4392.8	5800.49	4920.06	4271.51	5678.2	5465.78	5285.43	7164.57	6908.85	5213.24	3990.05	5584.28	8978.46	8909.58	6390.86	5750.6	7534.79	7862.14	6156.99	5973.53	8424.64	7912.75	4626.05	4834.6	5017.41	7828.12	9002.09
MA2556.1	ZNF510	2773.52	3030.82	2013.49	2603.89	2361.89	4918.78	2410.34	3107.73	3235.54	4136.87	2026.93	2026.57	1763.79	2583.8	2439.87	2832.17	1834.61	2807.39	3091.46	3083.29	2460.58	3005.51	3766.29	2297.36	2041.73	13023.1	3469.93	3069.28	2895.7	2622.22	2683.32	1112.46	2115.73	3400.67	4688.98	2837.15	2272.53	2761.65	2961.07	2460.95	2655.84	3411.69	3115.06	2664.85	6372.69	2652.82	3020.55	3513.22
MA2557.1	ZGLP1	0	0	0	0	0	0	0	0	0	0	0	0	0	0	0	0	0	0	0	0	0	0	0	0	0	0	0	0	0	0	0	0	0	0	0	0	0	0	0	0	0	0	0	0	0	0	0	0
MA2558.1	MSANTD4	548.476	503.923	626.715	1098.82	448.598	567.918	431.212	529.183	608.903	542.689	342.135	312.643	260.49	1163.93	450.361	435.184	368.937	409.314	575.892	510.288	312.601	352.552	280.29	289.415	321.035	410.708	275.289	364.73	177.288	221.653	300.646	93.1528	220.225	237.434	1118.9	283.231	267.357	276.607	208.139	260.87	287.575	396.263	245.28	384.302	411.187	500.901	351.305	204.451
MA2559.1	NACC2	0	0	0	0	0	0	0	0	0	0	0	0	0	0	0	0	0	0	0	0	0	0	0	0	0	0	0	0	0	0	0	0	0	0	0	0	0	0	0	0	0	0	0	0	0	0	0	0
MA2560.1	POGK	114.194	88.7328	233.351	204.003	109.897	85.9036	104.511	101.936	119.393	73.5081	169.63	455.886	149.721	116.252	95.2687	145.722	117.103	95.2982	177.383	85.4474	114.927	68.7477	63.7785	67.8629	53.7296	99.9607	70.4229	74.4604	30.0852	37.6138	224.973	14.9283	99.1013	38.2958	118.395	125.881	75.346	104.004	33.3807	62.3318	128.986	47.1391	52.3265	104.645	95.429	111.933	57.6095	31.2935
MA2561.1	TIGD4	3865.29	3104.32	4751.8	5784.77	1752.95	2264.78	2956.35	2097.23	2037.44	2104.06	1380.04	1831.02	1721.19	2003.01	1914.04	2403.92	2365.98	2479.32	2767	1993.24	1584.84	2229.89	2569.6	1706.55	2435.3	1816.68	2703.28	2065.96	3072.99	1806.8	13199.8	633.559	6664.96	2198.18	1765.52	5621.05	2065.94	2451.85	1672.96	2225.47	4205.79	1842.84	1761.11	3664.4	2135.92	1860.89	2134.94	1961.06
MA2562.1	TIGD5	3306.43	1042.94	7503.91	7889.59	918.815	1433.32	1652.84	1596.41	1137.21	1494.66	744.647	1063.73	660.964	1297.06	1227.36	1248.06	673.656	1307.62	1455.23	1456.2	748.173	1387.29	1253.75	995.988	1034.3	819.243	1410.06	1214.08	784.363	848.997	24914.8	242.436	4564.95	725.706	612.794	2251.33	1378.1	1506.96	683.323	1429.01	2863.06	885.331	786.533	2554.79	1185.85	985.012	1169.13	892.907
MA2563.1	TIGD7	486.189	281.429	736.723	359.851	371.129	274.149	213.137	344.811	280.573	235.498	274.57	225.452	310.398	270.005	220.232	334.071	274.499	254.649	284.674	341.789	288.466	100.477	243.365	201.593	177.308	193.402	208.068	194.354	313.745	155.828	370.183	87.1815	275.281	229.775	167.835	343.751	196.872	212.435	176.721	230.858	378.5	287.254	219.117	193.053	168.404	221.068	454.099	275.383
MA2564.1	ZNF43	1986.28	3942.65	3907.44	8196.91	2497.01	4917.72	3082.67	3827.49	4178.15	4437.71	3329.35	4592.49	3718.68	5025.1	3122.83	5130.02	3942.46	3885.35	4080.84	3665.85	3386.89	2332.13	3158.71	2860.22	2963.19	3802.85	3135.42	5882.38	2071.58	2651.77	3268.25	896.895	3245.18	2950.69	4491.22	3449.61	2688.15	3140.05	2391.63	2867.26	3438.21	2549.93	2614.69	2827.23	2973.73	2795.53	2339.4	2614.05
MA2565.1	ZNF70	0	0	0	0	0	0	0	0	0	0	0	0	0	0	0	0	0	0	0	0	0	0	0	0	0	0	0	0	0	0	0	0	0	0	0	0	0	0	0	0	0	0	0	0	0	0	0	0
MA2566.1	ZNF395	0	0	0	0	0	0	0	0	0	0	0	0	0	0	0	0	0	0	0	0	0	0	0	0	0	0	0	0	0	0	0	0	0	0	0	0	0	0	0	0	0	0	0	0	0	0	0	0
MA2567.1	ZNF497	455.045	734.363	612.428	676.801	574.71	497.923	376.899	523.422	681.732	418.815	610.955	565.497	477.16	556.417	493.047	583.88	496.113	601.472	555.571	523.066	576.933	553.507	433.022	518.952	362.675	786.647	369.72	646.165	377.139	677.048	634.015	235.271	454.608	603.159	398.121	656.031	403.466	469.126	612.634	457.1	543.432	561.25	560.875	516.011	523.456	556.868	408.915	659.249
MA2568.1	ZNF568	2318.48	3612.88	2515.91	3506.58	5159.77	4963.32	5086.9	5177.49	4198.44	5218.17	3869.86	7331.54	3964.57	5082.75	6215.36	4533.25	4491.46	4086.89	4556.85	5552.88	4451.12	4186.56	3892.17	4620.67	3767.79	4215.73	3942.08	4386.86	4967.28	6976.01	4102.69	2657.24	3960.91	6786.02	5655.66	4442.13	4404.1	4385.89	6992.28	4564.07	4250.19	6076.52	7430.36	4898.49	3644.54	4961.44	5137.42	6135.61
MA2569.1	ZNF676	3290.86	2357.38	3048.33	4263.93	2785.27	5527.53	5558.85	5358.76	5865.76	5493.14	3011.65	3831.43	3082.07	4839	5135.85	3424.97	3029.56	3579.15	5429.47	5152.8	4930.36	6176.71	7153.26	7694.46	6897.54	6136.72	7533.65	7664.38	9159.86	7636.94	4793.98	3194.66	6114.39	7168.98	6256.74	6189.93	9833.87	7669.77	7977.99	7576.77	6550.79	6948.6	7528.47	7002.23	7436.44	6441.76	7398.87	7197.5
MA2570.1	ZNF746	163141	239581	158694	141324	261369	143580	167513	168346	149891	142133	284567	241300	310788	164989	162441	225148	298705	233182	46457	178717	194846	189724	149285	154709	183393	135019	149210	144868	99354.1	123220	146852	48304.5	154202	104484	120554	127856	117187	135469	112448	147304	136873	104655	115344	155105	137590	166901	93421.2	105084
MA2571.1	ZNF800	0	0	0	0	0	0	0	0	0	0	0	0	0	0	0	0	0	0	0	0	0	0	0	0	0	0	0	0	0	0	0	0	0	0	0	0	0	0	0	0	0	0	0	0	0	0	0	0
MA2572.1	ZNF827	0	0	0	0	0	0	0	0	0	0	0	0	0	0	0	0	0	0	0	0	0	0	0	0	0	0	0	0	0	0	0	0	0	0	0	0	0	0	0	0	0	0	0	0	0	0	0	0
MA2573.1	ZNF836	6469.25	5864.31	8771.63	5490.58	5752.5	9382.59	13265.9	11801.6	9909.59	9119.99	7731.1	10495.3	9981.41	10115.8	10360.8	7496.27	9325.41	7092.69	8268.98	11554.2	9340.1	9243.92	11862.8	11161.5	12441.1	10495.9	12999.4	10071.1	15803.3	13279	8661.47	3588.18	10238.9	8329.34	9923.09	8078.14	11916.8	11633	12125.1	13188.9	10959.6	9066.91	13246.8	11182.6	13757.2	7765.37	10978.6	9373.44
MA2574.1	ZNF878	3777.05	2408.37	1668.22	1305.45	1866.45	1596.64	2004.23	1541.46	1525.24	1258.26	1972.31	1664.11	2043.76	1586.28	4899.53	1721.9	2072.59	2312.15	1732.67	1556.82	1757.23	3728.24	1891.54	2167.62	1665.62	1829.71	2048.67	2327.2	2066.21	2115.78	1683.21	919.586	2296.63	2743.9	2889.63	2018.93	2000.32	1832.25	2195.27	1842.25	2150.47	2790.05	2631.04	5327.9	1653.17	2171.5	2282.92	2707.93
MA2575.1	ZNF536	0	0	0	0	0	0	0	0	0	0	0	0	0	0	0	0	0	0	0	0	0	0	0	0	0	0	0	0	0	0	0	0	0	0	0	0	0	0	0	0	0	0	0	0	0	0	0	0
MA2576.1	ZXDB	18677.6	20108.6	20887.3	65455.3	15906.3	51972.8	40560.7	46007.1	50746.7	58243.8	22665.7	31061.3	20901.3	40551.9	44088.4	26565.1	21188.1	23690.2	36073.5	46060.1	27634.2	33524.2	34573	31558.3	30922.8	34895	34310.3	31320.1	35679.9	37400.2	17689	16288.6	22348.1	44545.7	37035.6	23663.1	36273	29103.5	40164.9	26641.1	21284.8	41103.8	39571.9	30616	34557.9	30736.9	35401.6	43689.9
MA2577.1	ZXDC	20162.1	20669.4	19473.9	51257.4	23154.1	56502.3	47284.8	52742.8	58358.5	62616.6	26774.2	32943.3	21894.6	48719.5	49404.3	29468.6	22676.4	27709.9	40164	53333.5	36762.8	38213.1	42881	41560	37754.5	40249.4	42455.4	36356.9	37056.3	42151.6	21225.2	17716.4	26041.6	49349.9	41238	27870.4	50802.7	35627	45011	33432.9	24718.8	46190.4	44385.9	36983.2	39907.5	38740.1	37202.2	48045.9
MA2578.1	ZBTB8A	51677.9	63773.7	71428.4	63948.5	144261	95285.2	104104	104585	98735.9	94401.6	186899	179033	207879	104417	103751	148414	198741	187503	51955.1	108154	130723	96074	109605	118584	123778	95627.6	111348	109856	101906	111206	100183	35445.3	102048	93639.1	98013.2	96456	133829	112362	115128	128249	113833	93703.7	116227	112209	111479	108304	90567.8	102161
MA2579.1	ZBTB8B	4666.37	1168.76	3422.17	1392.13	1745.75	3225.1	4420.74	3156.93	1208.85	2848.67	1602.86	2861.12	1673.71	2516.3	2048.28	2166.01	2232.51	2432.45	3055.29	4378.98	2260.61	3289.31	3454.11	3544.84	3124.38	2472.94	3389.9	3018.8	3807.92	4224.83	2468.57	1538.81	2184.95	2879.85	3001.52	2490.98	3949.59	3064.81	3402.87	2728.75	2617.78	5429.83	4475.55	3422.63	2872.69	2375.78	4913.76	2639.08
MA2580.1	ZNF20	3491.56	2475.91	2620.68	7045.56	1709.72	3277.06	3569.84	3063.86	2925.72	3255.68	5119.09	1726.39	1476.52	3236.31	2885.28	2214.58	1328.42	2441.82	3315.51	2795.81	2865.13	2485.49	2067.77	2271.41	2288.88	2553.34	2082.28	3110.93	2032.9	2028.46	1975.67	881.369	1860.9	2292.01	2669.75	3268.05	1621.16	3294.95	2207.05	2396.31	1960.16	2296.56	2183	2304.01	2312.75	2773.14	1809.62	2409.6
MA2581.1	ZNF66	13106.3	16508.9	24185.2	26388.2	11542.8	36188.2	40510.5	38003.7	39231.2	41935	19306.2	14980.7	15640.4	41578	41277.3	19826.2	18337.3	19501.8	24850.8	36782.3	30986.6	42602.4	63896	52382.2	46266.6	57005.8	63719.9	47312.7	52697.4	53062.3	38233.2	21613.8	41856.9	54537.1	45593.9	41368.7	64408.7	56138	60902.1	59155.2	45282.5	50469.8	55150.5	45937.6	59408.7	38116.1	47385.5	56144.7
MA2582.1	ZNF121	8183.89	16299	18194.7	18697.4	5977.7	6414.67	5842.34	5489.5	9804.52	6361.17	4293.94	8411.46	4329.74	7652.96	7112.99	8193.16	4394.5	6477.15	8736.37	5400.35	8489.64	5526.25	8101.55	6025.83	6130.55	9752.68	7866.56	8371.12	3928.26	4845.46	8528.53	1983.68	6771.92	6510.29	4933.57	14026	6727.67	6820.03	5007.11	6554.07	7474.84	5885.02	5057.68	6094.7	8295.3	6478.13	4153.54	6519.48
MA2583.1	ZNF142	16080.6	18452.4	26625.9	30371.1	40280.1	28067.7	37572.2	33768	23784.2	29182.3	58035	60604.1	75638.4	28968.4	31973.8	44451.3	68702.8	75327.8	32063.4	34785.5	60515.9	38371.8	45076.3	61685.4	61341.8	34056.2	49172.8	38927.7	57933.3	55511.2	34729.7	13308.9	41989.1	29443.8	41088.4	26384.1	81453.9	46607.2	51979.7	55932.4	45614.5	34109.6	56846.2	49766.2	54022.6	36154.4	45226.9	37166.2
MA2584.1	DNTTIP1	1006.98	2383.87	1799.66	1577.74	1239.5	1022.36	861.601	873.109	2233.24	883.912	10012.5	10866.5	9378.88	1334.09	1459.34	830.716	9089.95	1415.41	1793.81	855.671	1411.3	793.242	819.05	1115.75	902.658	858.358	731.438	767.321	345.979	494.353	846.717	201.234	772.361	536.142	425.443	927.159	974.638	940.465	492.856	884.188	795.061	441.929	508.548	990.524	874.298	1320.81	352.435	579.973
MA2585.1	ZNF500	4502	3265.9	6521.93	2773.75	5412	6976.22	8032.55	7677.59	5542.8	6776.36	3304.91	3460.25	3055.29	6104.18	5974.71	4314.17	3338.06	5128.92	9223.92	7486.63	4868.3	13952.3	6894.79	5263.37	5812.2	5802.06	6880.63	8176.77	7698.58	7000.19	5427.99	2570.06	6638.22	6579.22	6533.86	11525.3	6355.8	8585.89	7110.09	7151.99	7715.89	7072.34	7629.86	5472.24	6904.57	5770.16	6974.14	5974.97
MA2586.1	ZNF518B	783.784	1052.21	762.44	1371.99	711.631	869.642	766.553	979.034	1104.98	832.638	587.955	756.073	634.185	724.702	1564.51	639.394	570.404	801.442	932.036	973.86	760.816	939.551	897.934	510.968	499.686	730.148	771.451	1153.51	402.926	675.705	7812.71	377.986	3706.07	769.746	428.045	3248.69	831.237	2007.06	414.314	900.348	4387.63	503.799	502.007	1059.09	847.634	735.961	480.079	571.628
MA2587.1	ZNF672	30076.2	23017.6	39933.6	73970.9	33776.3	75709.2	69989.2	79128.9	70072.1	76648.1	31830	37635.5	32349.5	71604.4	62397.3	36358.2	33750.8	38761.4	49482.8	79226.5	46252.3	50164.6	75617.8	63445.8	64779.1	67338.7	75600.6	63141.2	58318	58948.9	43667.3	24214.4	46096.3	60528.5	54700	51850.7	60673	61212.1	63843.6	60046.3	50708.4	59552.9	61208.9	57832.9	64133.9	58787.3	56476.6	58671.1
MA2588.1	FAM200B	17533.9	9496.4	20409.2	17006.7	15859.5	20989.1	25984.6	25634.8	12633.5	22977.2	10702.5	12611.6	11240	18917.7	19549.3	19724.1	12192.5	17236.5	15926.6	26632.4	23487.6	28079	36718	44045	39901	19566.2	44175.9	25380.9	38344.6	43140.3	31136.3	9424.56	40773.1	17221.6	27279.1	27667.1	57476.9	41462.3	35460.1	43701.5	43770.6	22519.2	40417.3	43076.1	34696.8	21480	43331.4	18600.8
MA2589.1	ZNF728	4647.34	9742.73	18442.4	7373.01	4956.19	20734.6	19380.3	20685.6	28813.6	21765.2	6591.13	9818.98	5876.86	22385.1	27906.9	8078.17	6376.44	7100.5	14267.4	20181.1	12143.2	18133.5	24005.9	21095.4	19019	19933.5	23884.6	19579.3	28545.5	24798.2	13563.8	11574.8	12568.6	27938.7	19109.8	19586.5	20309.4	19988.8	27782.6	19013.5	13958	27212.5	25005.5	19550.7	20744.6	18427	22663.1	28462.5
MA2590.1	ZNF841	4737.31	4757.14	3363.59	4187.76	1533.16	3801.5	3972.25	3685.67	4205.61	3647.73	3234.47	3275.9	1841.69	5880.11	3231.09	3345.67	2141.85	2558.99	3507.53	3503.74	2915.69	3604.85	5407.75	4041.84	4150.61	4126.64	5041.64	4745.28	3976.62	4758.14	2877.61	1722.13	2755.96	5428.43	5256.23	3640.85	4878.05	4084.94	4973.73	3781.46	3514.34	4674.14	5119.82	4209.28	4262.03	5112.55	3497.24	4913.08
MA2591.1	ZNF850	11590.7	14818.4	11123.7	21329.3	11645.5	15755.9	15195.7	15340.1	17399.7	19462.4	12634.6	17944	13540.6	19271.2	19777.5	31356.1	13989.4	16561.6	19708.6	15172.9	22815.3	62340	21770.3	17540.6	19310.4	19557.5	21991.1	25238.3	17268.9	19645.1	12400.1	7569.27	13631.9	19869.8	21086.1	13788.8	21128.5	15793.2	20546.8	16859.6	13607	20523.2	21051.6	18459.1	20790.9	15930.9	17542.7	18711.4
MA2592.1	MKX	0	0	0	0	0	0	0	0	0	0	0	0	0	0	0	0	0	0	0	0	0	0	0	0	0	0	0	0	0	0	0	0	0	0	0	0	0	0	0	0	0	0	0	0	0	0	0	0
MA2593.1	ZNF362	6060.92	45138.5	14507.3	2621.4	13081.4	2939.28	5874.03	3583.73	5027.62	2459.34	14821.1	3841.4	10257.7	4765.4	3531.75	10907.4	10059.5	5986.6	4954.32	4235.63	3645.48	7997.65	11590.9	13428.9	13232.3	10850.1	11888.7	8721.97	6606.92	5967.16	6215.4	4735.87	5939.79	6711.35	6480.52	5984.17	8764.45	7286.95	5869.12	4988.85	6887	7530.47	7415.64	11016.6	6678.62	17811.4	7090.49	5889.43
MA2594.1	DMTF1	10206.5	7051.61	9164.04	4793.64	8006.3	8522.49	10312.5	10214.9	10279.1	9012	6326.62	7163.38	6541.48	9832.69	10634.2	7838.27	6509.91	6969.27	9953.94	9279.42	14286.6	11609.5	16186.3	15315.1	13620.5	11054.3	16019.6	15275.7	17678.3	18256.1	8461.04	6945.86	10380.5	17217.8	17807.4	12396.8	20588.9	12237.1	19250.9	12902.7	12107.8	17297.1	19061.6	11604.8	13875.1	11182.1	18298.4	15824.1
MA2595.1	ZNF700	328.74	536.37	678.148	598.001	417.971	384.976	347.685	324.424	331.912	318.535	429.825	459.622	451.598	271.88	1612.76	578.924	402.934	409.314	591.908	306.652	444.767	237.973	236.652	347.298	245.813	223.825	236.877	310.462	210.596	216.279	468.353	87.7786	270.562	459.55	215.974	375.221	269.788	287.672	245.446	286.264	321.407	294.619	188.048	331.979	196.471	372.178	224.79	538.248
MA2596.1	ZXDA	33187.1	26283.4	23717.1	78225.2	27088.8	62006	59099.9	61017.4	61542.7	66305.7	32223.9	37518.4	30520	60283.8	65154.5	33820.5	33321.4	41456.3	46793.8	60046.3	48083.1	49191.6	53817.3	55292.3	52420	49673.9	55408.4	50664.7	58772.5	58935.4	30211.9	22352.5	36960.1	62418.4	66434.1	39838.8	65317.7	47494.6	58803.1	49099	38298.2	59331.9	60533.6	47534.3	65541.4	43421.7	52881	63156.5
MA2597.1	LEUTX	4626.58	3710.88	8284.92	5255.93	3783.35	3130.71	2506.62	2663.65	2389.64	3016.55	2627.83	2085.12	2167.91	3483.35	2501.73	3700.55	2256.43	2638.67	2988.3	2403.71	2185.91	1907.31	2596.46	2275.4	1940.98	2094.83	2813.71	2062.18	2889.25	3645.85	6859.64	1205.02	3345.85	3429.39	2710.08	4185.53	2291.98	3086.94	2652.79	2327.05	4751.33	3310.05	2606.51	2228.23	2794.1	2384.18	2958.42	3506.96
MA2598.1	MSANTD1	449.854	531.072	431.462	567.357	392.748	378.612	255.929	325.31	521.746	305.83	342.135	301.433	294.573	413.445	358.804	509.532	357.604	459.306	497.706	351.372	547.052	320.822	187.979	347.298	225.665	212.96	166.454	267.553	122.49	236.429	605.383	63.2962	626.069	264.241	231.587	256.603	267.357	234.563	227.774	277.03	439.821	191.503	284.525	263.418	202.085	414.153	228.179	258.693
MA2599.1	TIGD3	612.494	1411.78	1033.41	1103.19	484.63	762.527	618.427	675.884	955.738	983.738	725.959	783.476	660.964	815.172	794.318	870.369	677.433	728.016	822.851	633.269	924.011	505.912	365.887	588.811	397.599	547.611	409.733	506.079	276.139	350.614	672.875	143.909	429.439	444.232	372.1	593.091	461.798	511.171	433.949	676.415	687.22	436.037	415.341	512.402	493.985	710.776	309.51	515.299
MA2600.1	TPRX1	527.714	1095.25	841.97	600.628	1551.18	617.234	555.473	612.506	662.629	552.218	869.713	645.215	845.986	776.734	821.538	895.151	881.419	810.816	653.217	585.354	726.337	532.354	790.518	764.456	535.953	747.532	721.835	687.813	1034.72	949.748	903.984	333.201	775.507	1269.51	768.919	762.546	561.45	683.774	797.21	607.158	892.328	1129.87	925.525	644.111	827.986	979.415	1137.51	1416.55
MA2601.1	USF3	3612.68	5012.74	10569.4	1873.68	2824.9	3499.78	8234.17	4090.76	4294.55	3389.54	3053.34	3300.81	3534.88	5116.97	4689.2	2595.24	3281.4	3530.72	4641.58	3880.27	6470.38	3596.03	8022.66	9317.18	6272.94	5350.07	8233.07	6267.3	5570.05	5865.06	5677.51	1815.29	8566.76	4679.75	5443.59	9973.61	15778.9	11714.9	5411.6	9769.93	10268.1	4675.61	5883.46	4207.47	18793.9	6223.49	4540.99	4581.37
MA2602.1	ZBED5	21769.5	16044.1	16047.4	18972.3	14110.1	22201.8	25906	23613.8	19518.9	24636.6	16346.3	19243.1	15696.4	25140	26799.6	26375.7	18358.7	26550.7	23310.2	24605.6	26465.3	31824.9	48179.6	49362.3	48797.3	30377.2	52207.4	39990.3	45364.1	40761.2	23434	12047.8	29085.5	26590.7	28157.3	23304.8	63575	33321.2	38258.2	35921.6	30760	29579.8	39477.1	41928.6	44984.9	30124	45306	26582.8
MA2603.1	ZFTA	51511.8	48513.7	33573.5	60724.7	35185.2	55349	57162.7	52277.9	50283.4	55721.9	21718.4	39482.7	25335.7	45845.6	68582.4	28823.3	25688.3	24919.7	55086.2	53721.2	46676.4	37243.6	52565.2	57647.6	50002.1	40216.8	56847.3	46246.2	78073.2	53155	39333.5	17524.7	44877.2	41058.9	44808.1	44702.1	71787.8	52219.1	48557.2	50179.4	53656	41529.5	51778.7	44829.8	53022	40419.1	47555	40447.9
MA2628.1	HELT	2951.74	3446.67	5738.54	2495.32	1893.48	2560.67	2881.05	2718.16	2892.29	2251.98	1847.24	2538.51	2488.05	3456.16	2424.4	2327.59	2398.72	2421.51	3285.72	2505.92	4459.16	2268.67	4994.86	6690.49	4383	3261.76	5651.44	3935.05	2874.21	3815.11	3732.51	970.939	5472.6	2270.94	3581.79	6255.3	10140.1	7216.13	3065.14	5609.86	5559.08	2408.51	3633.42	2863.32	4405.17	4093.96	3107.53	2161.34
MA2629.1	GSC::TBX21	9453.86	6533.78	11447.5	6144.62	7907.21	9561.82	10048.7	9114.46	8825.5	8861.36	6398.5	6308.91	5639.5	8045.31	7092.57	6917.35	6662.27	6091.27	11026.7	8565.9	6189.96	6559.23	6238.55	5119.66	6342.78	6792.98	5928.33	7287.03	6132	6278.81	7060.07	2667.4	6611.47	7557.68	7733.43	6887.12	4224.24	5879.57	6998.17	6057.72	6457.75	6973.64	6436.16	7278.28	6051.32	6198.3	6259.11	7598.06
MA2674.1	HIF3A	0	0	0	0	0	0	0	0	0	0	0	0	0	0	0	0	0	0	0	0	0	0	0	0	0	0	0	0	0	0	0	0	0	0	0	0	0	0	0	0	0	0	0	0	0	0	0	0
MA2675.1	HOMEZ	164.37	117.207	180.014	118.199	147.731	74.768	61.3078	73.5716	50.1449	65.7943	104.941	113.349	287.27	80.6266	58.151	143.74	104.511	96.8605	88.3471	68.278	116.076	75.7987	134.27	151.694	95.3701	108.653	102.433	102.225	70.9151	71.1975	87.9441	27.4681	108.54	95.7396	288.833	162.192	85.0681	104.004	82.47	101.578	148.017	81.0203	88.3009	88.4074	105.252	151.11	62.1279	64.6732
MA2676.1	HSF5	297.596	175.479	963.884	386.993	1875.46	256.12	237.002	272.126	145.062	229.146	205.569	521.902	318.918	224.536	248.07	11310.8	269.462	254.649	327.728	235.18	357.422	128.681	137.627	157.681	147.756	117.345	217.671	156.493	122.49	173.292	241.335	82.4044	239.102	212.542	163.932	183.979	165.275	225.712	161.013	219.315	245.285	172.352	217.482	142.534	123.496	137.118	162.662	135.605
MA2677.1	HOXD1	558.857	301.956	671.48	1390.37	302.668	335.13	315.591	275.672	391.011	388.867	582.204	492.008	562.367	260.161	304.365	255.757	548.998	340.574	335.306	262.331	222.958	255.6	691.493	313.367	298.2	282.498	835.471	578.015	457.724	502.413	2388.81	186.903	1343.37	516.994	305.746	1280.59	388.883	495.68	522.31	512.506	1336.38	683.517	502.007	414.974	401.363	324.606	782.812	383.867
MA2678.1	IRX1	0	0	0	0	0	0	0	0	0	0	0	0	0	0	0	0	0	0	0	0	0	0	0	0	0	0	0	0	0	0	0	0	0	0	0	0	0	0	0	0	0	0	0	0	0	0	0	0
MA2679.1	IRX2	0	0	0	0	0	0	0	0	0	0	0	0	0	0	0	0	0	0	0	0	0	0	0	0	0	0	0	0	0	0	0	0	0	0	0	0	0	0	0	0	0	0	0	0	0	0	0	0
MA2680.1	IRX5	0	0	0	0	0	0	0	0	0	0	0	0	0	0	0	0	0	0	0	0	0	0	0	0	0	0	0	0	0	0	0	0	0	0	0	0	0	0	0	0	0	0	0	0	0	0	0	0
MA2681.1	KLF8	206201	260913	224862	203458	287216	162546	193364	186320	159988	162958	314691	327524	362067	159918	161730	290479	378933	301878	77476.1	187930	318567	226753	263545	256550	313241	234742	277988	226350	244192	253384	241085	77456	267624	182817	226773	213399	214554	264527	223144	281324	257923	195813	238228	241693	276265	260396	215872	182660
MA2682.1	MYT1L	0	0	0	0	0	0	0	0	0	0	0	0	0	0	0	0	0	0	0	0	0	0	0	0	0	0	0	0	0	0	0	0	0	0	0	0	0	0	0	0	0	0	0	0	0	0	0	0
MA2683.1	NPAS3	0	0	0	0	0	0	0	0	0	0	0	0	0	0	0	0	0	0	0	0	0	0	0	0	0	0	0	0	0	0	0	0	0	0	0	0	0	0	0	0	0	0	0	0	0	0	0	0
MA2684.1	SOX30	1498.36	1797.17	1989.68	2436.66	1668.28	1604.6	1403.08	1455.48	1420.77	1416.62	1403.04	1329.04	1101.61	1423.15	1716.07	1738.75	1140.81	2896.44	2224.52	1425.45	1417.05	1873.81	1371.24	698.589	924.15	1206.05	1440.47	1532.12	2631.38	1836.36	4057.7	892.118	3849.22	2900.91	2544.85	4371.93	1616.29	5332.99	1753.47	1634.48	4599.09	2249.42	1923	2069.46	1128.31	1060.57	2711.04	3179.42
MA2685.1	TLX3	1036.39	735.025	2830.22	1852.67	699.02	721.697	628.302	654.61	518.761	575.36	1254.97	1280.47	977.448	607.512	755.345	783.134	1052.67	679.586	895.182	612.106	505.678	691.002	928.145	500.988	586.996	756.224	965.114	771.107	1060.5	720.035	7456.84	350.517	2471.24	955.481	772.823	1752.64	663.531	1017.92	785.429	900.348	1829.06	1032.64	1002.38	1228.68	733.961	584.851	1154.45	1001.39
MA2686.1	ZEB2	0	0	0	0	0	0	0	0	0	0	0	0	0	0	0	0	0	0	0	0	0	0	0	0	0	0	0	0	0	0	0	0	0	0	0	0	0	0	0	0	0	0	0	0	0	0	0	0
MA2687.1	ZNF251	1436.07	1550.18	1712.99	856.289	1351.2	1028.19	954.591	946.237	1069.16	960.143	934.402	1063.73	953.103	4588.21	1251.48	1089.45	1004.82	1334.17	901.898	892.406	1122.83	891.957	1042.28	882.218	693.112	1023.51	1003.53	902.36	658.65	818.1	959.204	343.949	700.001	980.373	824.865	1101.45	838.529	1031.19	895.389	1059.64	873.298	933.943	845.4	842.577	771.852	1105.34	715.036	1368.57
MA2688.1	ZNF347	271103	202305	193589	209089	327718	225338	130721	119854	247513	213789	393117	283920	489325	145358	225361	217867	459689	245582	71887.3	139046	262485	299449	319544	236255	345448	297865	332971	233470	193211	251527	293255	92650.1	348417	221103	216726	232651	194247	247442	206277	231971	301222	204962	188429	258000	332956	328045	224630	211851
MA2689.1	ZNF470	2105.66	7125.11	3650.28	6868.7	7017.22	3130.18	2321.06	2606.92	2825.43	2555.54	7755.54	4511.52	10147	3265.84	2587.1	4187.29	9533.18	4100.95	2999.32	2476.38	3605.25	2993.17	3804.89	3227.48	2744.24	2807.59	4455.85	3229.56	2020	2293.1	2697.63	1016.32	2147.2	2822.4	2535.74	3021.13	2488.85	2615.6	2766.67	2585.61	2719.28	2644.21	2513.31	3523.67	2566.76	4264.65	2162.05	2914.47
MA2690.1	ZNF724	569.239	544.316	375.267	519.202	825.132	572.691	525.025	552.673	638.751	506.389	517.515	961.595	456.467	475.791	426.853	575.95	433.154	687.397	598.452	572.178	499.932	340.213	335.676	335.323	350.586	328.132	358.516	525.009	541.533	502.413	347.686	232.285	300.45	610.819	1509.22	530.151	386.452	356.27	539.982	337.053	501.142	636.378	495.466	378.889	444.867	447.733	612.243	711.405
MA2691.1	ZNF841	5522.83	6329.16	4248.42	6971.14	4568.85	8655.06	8281.9	8098.19	12761.9	8371.75	8727.32	5859.25	6175.09	11238	8582.85	5817	7299.41	6320.93	8150.49	7978.15	8682.72	9005.94	12614.7	10109.6	9477.91	10458.9	12191.2	10064.8	9162.01	10554.7	7747.26	4500	8319.79	12800.4	9817.71	10307.7	12303.3	10119.4	11290.5	10575.6	9599.93	12178.1	10707.3	9511.92	9867.07	9301.65	8416.64	13802.5
MA2692.1	ZNF43	951.615	2810.31	911.023	1111.07	5035.46	849.491	1809.61	852.278	1191.54	718.746	1518.04	1134.73	1369.4	831.579	911.858	2301.82	1391.38	2032.51	1160.22	864.456	1167.66	440.69	1591.11	830.323	865.047	714.936	1765.37	1286.02	6487.65	1805.46	1075.78	908.24	1247.42	3253.23	1572.97	1522.67	512.839	938.252	1517.84	789.536	2816.54	4824.39	3283.49	728.91	1010.42	842.297	8813.13	2778.86
[truncated: 57 more columns]

## Sheet: Density in G4-free Genomewide
Motif_ID	Motif_Name	Erpetoichthys_calabaricus	Latimeria_chalumnae	Leptobrachium_leishanense	Xenopus_tropicalis	Anolis_carolinensis	Chelonoidis_abingdonii	Chelydra_serpentina	Chrysemys_picta	Crocodylus_porosus	Gopherus_evgoodei	Laticauda_laticaudata	Naja_naja	Notechis_scutatus	Pelodiscus_sinensis	Pelusios_castaneus	Podarcis_muralis	Pseudonaja_textilis	Salvator_merianae	Sphenodon_punctatus	Terrapene_carolina	Varanus_komodoensis	Amazona_collaria	Anas_platyrhynchos	Apteryx_haastii	Aquila_chrysaetos	Athene_cunicularia	Cairina_moschata	Calidris_pugnax	Catharus_ustulatus	Corvus_moneduloides	Coturnix_japonica	Ficedula_albicollis	Gallus_gallus	Geospiza_fortis	Manacus_vitellinus	Meleagris_gallopavo	Nothoprocta_perdicaria	Numida_meleagris	Parus_major	Pavo_cristatus	Phasianus_colchicus	Serinus_canaria	Stachyris_ruficeps	Strigops_habroptila	Strix_occidentalis	Struthio_camelus	Taeniopygia_guttata	Zonotrichia_albicollis
MA0002.3	Runx1	7035.03	5316.02	7951.09	9191.53	6651.5	8374.01	8072.47	7741.41	8710.89	9276.54	7790.04	6584.18	7033.24	7890.62	8104.65	10981.7	7270.45	7391.08	8355.6	7788.49	8208.07	10352.7	8996.13	8139.56	9355.67	9635.34	9391.85	9737.91	10854.3	9858.84	9665.67	13357.9	9589.23	10324.6	9902.28	9058.56	8319.66	8948.8	10245.9	9668.35	9777.55	10226.2	10828.3	10311.2	9458.69	7896.89	10674.7	10070.2
MA0003.5	TFAP2A	3977.75	5168.35	7268.18	6317.98	4637.31	9183.74	9320.02	8808.2	9957.35	9965.79	5034.27	5880.43	4501.37	9855.19	8731.32	7086.86	5039.2	5352.32	10963	9153.25	8211.52	7488.21	7069.34	6816.23	7309.92	6869.04	7168.73	7448.57	8585.02	8391.9	6475.14	10374.6	7179.34	8421.25	8171.88	6615.99	7780.09	6908.55	7981.92	7175.08	6538.1	9106.68	8692.74	7388.34	7324.17	6173.12	8751	8196.81
MA0004.1	Arnt	0	0	0	0	0	0	0	0	0	0	0	0	0	0	0	0	0	0	0	0	0	0	0	0	0	0	0	0	0	0	0	0	0	0	0	0	0	0	0	0	0	0	0	0	0	0	0	0
MA0006.2	Ahr::Arnt	0	0	0	0	0	0	0	0	0	0	0	0	0	0	0	0	0	0	0	0	0	0	0	0	0	0	0	0	0	0	0	0	0	0	0	0	0	0	0	0	0	0	0	0	0	0	0	0
MA0007.4	Ar	2467.28	2271.96	3380.74	3595.01	2507.82	3165.71	3219.28	3085.13	3162.71	3497.99	2616.33	2129.96	2114.36	3627.73	3316.47	3233.65	2232.51	2980.8	3124.52	3167.94	3173.13	3862.21	3588.38	3247.44	3574.36	3535.57	3735.61	3721.76	4277.47	3942.73	3904.31	5480.49	4004.95	3990.43	4181.57	3887.77	3543.69	3589.26	3925.18	4035.4	4093.72	4014.19	4020.96	3803.32	3645.95	3282.44	4233.74	3865.79
MA0009.2	TBXT	3197.43	2013.7	3660.76	4026.66	2134.89	2919.13	3163.32	2841.81	2857.66	3084.16	2435.2	2071.41	2271.38	2633.96	2847.55	2605.16	2326.95	2877.69	2499.72	2891.63	2649.06	3881.6	3230.88	2702.54	3070.65	3296.53	3173.83	3209.37	3583.36	3245.53	3660.93	4778.86	3411.92	3247.49	3022.34	3352.78	2836.41	3164.39	3200.62	3275.88	3376.89	3162.74	3101.98	3444.28	3483.16	2412.16	3569.53	3348.4
MA0014.4	PAX5	2602.23	1144.92	3000.71	1902.57	1457.49	2190.01	2412.81	2170.8	1870.88	2278.75	1480.67	1616.77	1565.38	2145.04	2072.4	1975.68	1469.45	1609.13	2885.32	2280.73	1881.35	2330.37	1851.26	1810.34	2041.73	1934.02	1923.82	2199.74	1867.43	1765.16	1852.96	2219.55	2044.95	1625.66	1662.74	1922.1	2148.58	2018.13	1720.09	1911.51	1892.5	1667.55	1833.06	1979.24	2062.95	1631.43	1825.43	1671.07
MA0017.3	NR2F1	4936.29	3745.98	6494.31	4267.44	4536.42	5165.88	5097.6	5110.57	5649.06	5815.31	4140.12	4683.41	4100.9	4895.72	5262.05	5005.12	4091.04	4115.01	5463.57	5165.17	4355.73	4584.94	4162.39	4143.63	4472.99	4233.12	4193.36	4462.58	4603.03	4447.83	4358.35	5874	4066.3	4157.01	4634.33	3987.02	4433.26	4169.03	4435.71	4157.76	4275.56	4498.84	4663.6	4077.57	4549.72	3898.07	4845.98	4333.1
MA0018.5	CREB1	6889.69	4289.63	7389.14	5848.68	4368.87	5158.46	5016.54	4864.15	4965.54	5538.97	4743.89	4467.93	4660.83	4661.81	5588.07	4289.39	4623.67	4072.83	4884.92	5101.29	4338.49	5143.74	5065.36	4704.5	4959.25	5373.97	5086.45	4860.12	5362.68	5112.79	5779.77	6653.86	5493.04	4959.31	5796.17	5889.76	4491.6	5662.71	5319.32	5584.46	5992.56	5170.57	5461.58	5127.63	5327.18	4256.26	5427.72	4860.92
MA0019.2	Ddit3::Cebpa	3683.61	3185.77	5092.77	5504.59	3532.93	4494.56	4460.24	4405.87	4276.05	4718.13	3803.74	3249.74	3258.57	3992.89	4167.7	4452.96	3437.53	4027.52	3994.91	4479.6	5107.35	4350.49	4051.61	4413.09	4458.22	3957.14	4273.39	4022.13	4437.56	4175.13	4487.19	5547.37	4321.13	4024.89	4021.54	4279.94	4241.25	4226.56	4015.5	4448.64	4495.47	4158.55	4248.26	4257.99	4137.13	3951.24	4280.05	4141.17
MA0024.3	E2F1	1114.25	1082.67	2382.09	2555.73	947.64	1389.84	1493.61	1325.17	645.317	1417.53	724.521	607.847	657.312	1285.81	970.628	1388.82	924.231	679.586	1336.92	1467.78	1666.44	364.891	379.314	532.923	424.464	328.132	395.328	391.233	351.352	405.692	368.138	391.72	407.417	400.192	294.037	360.696	644.087	338.567	251.337	330.127	395.416	337.339	397.354	420.386	411.187	495.304	360.342	275.383
MA0025.3	NFIL3	6043.62	3820.81	5307.55	7046.43	5058.89	4968.62	4875.41	4853.95	4948.83	5181.41	5691.23	4773.1	4924.98	5369.17	4856.85	4467.83	5109.71	4510.26	3632.91	4957.94	4993.57	5045.02	5491.67	5610.67	5484.45	5569.55	5460.97	5263.97	5474.43	5134.28	5581.38	7118.43	5370.35	5263.76	5251.03	5388.66	5245.06	5355.12	5403.75	5120.44	5724.01	5036.52	5419.06	5104.18	5498.39	5039.79	5751.92	5288.6
MA0027.3	EN1	0	0	0	0	0	0	0	0	0	0	0	0	0	0	0	0	0	0	0	0	0	0	0	0	0	0	0	0	0	0	0	0	0	0	0	0	0	0	0	0	0	0	0	0	0	0	0	0
MA0028.3	ELK1	2681.82	1166.77	2986.9	1909.58	1408.85	1714.36	2091.87	1809.15	1297.2	1807.75	1917.68	1750.05	2228.78	2249.11	1831.14	3487.42	1884.98	1620.07	2628.89	1902.6	1687.13	1031.21	736.81	1115.75	925.493	738.84	793.858	930.125	1508.56	943.031	1053.28	897.492	1077.53	710.388	925.045	963.47	994.082	1088.73	679.396	1094.27	970.566	770.43	865.022	974.286	900.962	1186.49	830.255	644.646
MA0029.2	Mecom	5396.52	3831.4	4344.14	5220.03	4846.3	4906.58	4570.52	4503.82	4646.76	5061.62	5878.11	5572.77	5966.94	5065.41	4869.84	3752.1	6084.31	4327.48	3946.51	4584.21	4368.37	5394.05	5419.49	5259.38	5292.37	5549.99	5681.85	5600.94	5874.13	5112.79	5822.72	7378.78	5620.46	5229.3	5373.33	5516.96	5787.06	5625.09	5427.31	5302.82	5988.33	5082.18	5358.56	5154.69	5616.27	4869.09	5688.66	4994.44
MA0030.2	FOXF2	6066.11	4397.57	5340.41	6478.2	4857.11	4991.96	4872.94	4852.18	4141.73	5224.97	5028.52	4719.54	4963.93	4397.9	4595.79	4822.71	4788.62	4144.69	3973.72	4943.57	4262.64	4826.44	5211.38	4999.9	5070.74	5341.38	5488.18	4969.92	5302.51	5083.23	5828.85	6556.53	5161.13	5315.46	4915.36	5267.62	4904.78	5045.32	5119.03	5228.94	5301.11	4892.15	5147.62	5107.78	5282.27	4983.83	5487.59	5013.22
MA0031.2	FOXD1	5164.67	3841.34	5748.06	5557.12	3880.64	4842.95	4670.5	4659.39	4005.62	5154.64	3435.72	3198.67	3942.66	4314.93	4293.28	4018.76	3576.04	3477.6	3686.29	4837.76	3708.69	4165.4	4711.22	4464.98	4526.72	4880.69	4729.54	4431.03	4447.23	4347.08	4871.69	5509.75	4513.04	4530.4	4502.93	4480.86	3993.34	4374.82	4386.62	4587.16	4806.31	4232.21	4751.9	4723.48	4744.78	4359.8	4588.43	4420.73
MA0032.2	FOXC1	12836.4	9441.43	11264.7	15514.8	12227.4	9094.12	9128.69	9115.78	8011.84	9547.43	11394	14700.4	12222.4	8488.29	9236.12	8461.81	11671.2	9058.02	11454.3	9275.43	11178.9	8480.64	13034.3	9866.07	9154.19	9520.17	13447.6	9312.6	10246.2	9004.47	12261	13271.3	9792.15	9916.71	9569.21	9891.31	11229	9648.07	10291.1	9289.74	10733.3	8965.27	9585.56	8875.02	9707.09	8467.75	10874.6	9815.72
MA0033.2	FOXL1	5164.67	3841.34	5748.06	5557.12	3880.64	4842.95	4670.5	4659.39	4005.62	5154.64	3435.72	3198.67	3942.66	4314.93	4293.28	4018.76	3576.04	3477.6	3686.29	4837.76	3708.69	4165.4	4711.22	4464.98	4526.72	4880.69	4729.54	4431.03	4447.23	4347.08	4871.69	5509.75	4513.04	4530.4	4502.93	4480.86	3993.34	4374.82	4386.62	4587.16	4806.31	4232.21	4751.9	4723.48	4744.78	4359.8	4588.43	4420.73
MA0035.5	GATA1	2723.35	2040.19	3228.34	4529.23	2808.69	3215.55	3086.79	3082.47	3130.48	3605.07	3172.65	3034.25	3099.11	3598.19	3508.86	2398.97	3293.99	2748.03	2700.01	3138.39	2791.57	2933.23	2886.82	3293.35	3106.92	3046.63	2973.77	3292.67	2963.39	2963.43	3161.9	3798.37	2814.16	2887.51	2946.87	3042.92	3128.08	3011.7	3131.9	3040.4	3013.19	2826.87	2915.57	3323.4	3139.33	2901.87	2970.85	2822.67
MA0036.4	GATA2	2851.38	2386.51	3615.52	5006.4	3284.31	3719.84	3423.77	3335.1	3911.9	3868.7	4189	3703.14	4014.48	3308.5	3532.99	3123.61	4171.63	3643.2	2997.77	3511.73	3335.18	4061.4	4150.64	4097.72	4145.24	3861.52	4060.52	3937.57	4455.83	3811.08	4575.14	5016.52	4360.46	3844.9	3857.61	4180.69	4209.66	4133.62	3933.03	4238.56	4529.31	3847.73	3805.12	3920.6	4203.08	4029.6	4100.44	3832.41
MA0037.5	Gata3	2815.05	2238.85	3458.36	4566.87	3309.53	3539.02	3249.31	3218.54	3735.2	3687.66	4196.18	3741.75	4007.17	3402.72	3370.29	3064.13	4214.44	3390.12	2941.29	3287.33	3286.91	4121.33	4194.28	4111.69	4090.17	3948.45	4017.3	3951.45	4439.71	3934.67	4548.55	5109.08	4360.46	4021.06	3864.11	4267.84	4153.75	4273.03	4050.85	4083.88	4493.36	3919.91	3909.77	3992.77	4249.4	3909.27	4252.94	3853.27
MA0038.3	GFI1	5128.34	3947.28	7155.31	6652.44	5532.71	6379.14	6147.24	6008.05	6000.08	6533.15	5662.48	5529.17	5242.68	6110.27	6863.06	4928.78	5351.47	5269.52	4810.52	6105.09	5178.6	7033.41	6535.62	6490.89	6426.07	6171.48	6693.37	6690.08	7584.69	6816.15	7645	9598.92	7204.51	7236	6977.52	6695.88	6513.79	6879.78	7176.85	6782.62	7369.11	7003.1	7317.53	6462.76	6442.86	5918.47	7160.53	7212.11
MA0039.5	KLF4	4749.42	7011.21	7447.72	7793.28	6067.78	9568.18	10802.9	9935.71	9612.3	10680	8559.12	8803.82	8108.07	10203	9912.28	11074.9	8343.26	7370.77	16464.9	10344.7	9211.38	8651.63	5602.44	4806.29	6584.57	6432.25	5773.08	8090.95	7994.06	7176.17	5724.55	8806.53	6152.15	6613.69	7127.14	5441.91	4462.43	5724.67	6532.8	5676.81	5550.62	6925.03	7144.2	6359.92	6969.12	4505.31	7095.01	6484.01
MA0040.2	Foxq1	8645.85	6615.89	6993.4	10460.2	6447.92	6626.78	6508.09	6468.54	6016.2	6987.35	7261.02	7062.49	7126.97	6261.22	6892.14	6779.56	7014.84	5658.53	5324.59	6617.78	5698.07	6576.86	7210.33	7151.55	6784.71	7012.46	7565.66	6430.1	7082.91	6691.22	7491.61	9049.56	6889.9	7306.85	6695.19	6848.39	6652.33	6941.74	6968.72	6452.49	7206.29	6618.62	6951.25	6599.89	7225.94	6360.6	7479.07	6663.43
MA0041.3	FOXD3	15878.1	14695.9	14835	16559.3	13012.9	11155.8	10623.1	10830.1	9449.93	11582.1	13984.4	16633.6	14546.1	9835.5	11858.5	11491.2	13673.3	11167.1	14216.6	10924.5	13138.4	11985	20657.5	12087.6	12379.3	13110.1	20965.2	12943.5	14243.2	11865.8	18832.3	18874.8	14800.7	12815.7	13113.3	14793.4	14313.3	13356.8	14536.3	13124.3	15717.2	12508.1	13333.4	11967.5	12212.1	10930.3	14326.7	12586.2
MA0042.2	FOXI1	5164.67	3841.34	5748.06	5557.12	3880.64	4842.95	4670.5	4659.39	4005.62	5154.64	3435.72	3198.67	3942.66	4314.93	4293.28	4018.76	3576.04	3477.6	3686.29	4837.76	3708.69	4165.4	4711.22	4464.98	4526.72	4880.69	4729.54	4431.03	4447.23	4347.08	4871.69	5509.75	4513.04	4530.4	4502.93	4480.86	3993.34	4374.82	4386.62	4587.16	4806.31	4232.21	4751.9	4723.48	4744.78	4359.8	4588.43	4420.73
MA0043.4	HLF	5201.01	3356.62	4659.41	6974.64	4794.05	4327.53	4134.37	4145.71	4203.22	4422.74	4802.83	3892.47	4188.54	4690.4	4029.12	3746.15	4355.47	3843.17	3173.61	4252.8	4426.98	4116.05	4622.26	4708.49	4534.78	4628.61	4545.48	4342.68	4463.35	4157.67	4524.01	5642.32	4332.14	4258.5	4184.17	4306.57	4445.42	4332.78	4390.55	4236.25	4641.38	3967.05	4359.45	4135.3	4438.85	4225.48	4647.17	4293.47
MA0046.3	HNF1A	7014.27	3672.48	5734.73	7642.68	4617.49	4794.17	4798.88	4771.52	4042.04	4788.92	5251.34	5192.86	5092.95	4662.28	5036.25	4071.3	5330.07	3604.15	4245.48	4799.03	4094.84	4658.98	5424.53	5083.73	5068.05	5267.49	5805.09	5180.68	5805.36	4794.41	5738.86	7240.25	5008.55	5175.68	5176.87	5165.94	5364.15	5355.12	5439.09	4734.91	5322.25	5124.9	5340.57	4817.3	5174.21	4717.98	6003.82	5215.58
MA0047.4	FOXA2	7647.52	5549.77	7465.81	8930.62	6121.83	6836.23	6680.49	6556.73	5739.2	7248.26	5482.78	5206.56	5992.5	6132.31	6233.92	5579.08	5812.33	4847.71	4932.45	6863.74	5168.26	6139.7	6745.42	6510.85	6615.46	6914.67	6859.83	6308.95	6690.73	6364.79	7115.29	8406.45	6498.22	6738.15	6684.79	6461.06	6127.33	6408.44	6599.56	6519.44	6933.52	6256.24	6923.45	6690.1	6800.72	6226.28	6987.7	6496.53
MA0048.3	NHLH1	7763.45	6224.54	10884.2	9074.21	7382.95	13527.2	12773	12458.4	14924.1	14174.4	8471.43	8910.94	7548.14	13779.6	13344.4	12083.1	8381.03	11970.1	14638.4	12826.7	13996.9	13548.6	14603.6	13460.8	14853.6	13442.5	14811.2	13637.6	17613.8	16928.9	15733.8	22510.1	15985.2	17208.2	14126.8	14674.8	14162.6	14879.3	16763	17028.1	15871.6	17419.4	16482.8	13497.5	14192.2	11487.1	17473.8	16604.3
MA0050.4	Irf1	14807.1	11870.3	11599.5	13529	11173.5	12692.5	12108.9	11886.2	12496.2	13162.5	14440.1	13025.1	14149.3	11864.8	13376.6	11414.9	14260.1	12409.1	10335.9	12139.1	12910.9	15732.6	16342.4	15386.9	15471.5	15341.8	16576.6	15520.6	17103.4	15949.6	17799.5	21956	16660	15986.6	15690.6	16439.5	15565	16494.7	16505.8	15559.9	17383.5	16102.4	16723.2	15595.8	16046.1	14962.7	17160.9	15844.9
MA0051.2	IRF2	4894.76	4161.83	5070.39	5447.68	4077.01	4305.26	4123.26	4037.57	4219.93	4682.74	4472.19	4269.88	4463.64	4063.67	4529.6	4063.37	4473.83	4177.5	3927.05	4097.48	4529.27	4939.26	5119.06	4957.98	5162.08	4845.92	5174.48	5339.7	5558.24	5130.25	5695.91	7414.01	5236.64	5250.36	5172.97	5250.67	5053.05	5085.15	5266.3	5030.4	5482.96	5338.5	5191.77	5246.71	5073.17	5034.2	5532.78	4875.52
MA0052.5	MEF2A	9770.49	8601.12	10122.7	12093.1	8939.53	8635.44	8590.5	8393.37	8344.35	8879.51	9917.6	9248.5	9613.8	9098.15	9648.74	8026.62	9924.78	7495.75	6734.01	8639.77	7708.14	8790.89	11105.9	10203.4	9937.3	10174.3	11205.2	10496.4	11207.8	9744.66	10230.1	13603.9	9645.86	10450.9	9913.99	9758.16	10908.2	9926.89	10835	9040.41	10397.1	9977.28	10365.5	9282.78	10070.6	9830.53	11310.7	10393.6
MA0056.3	MZF1	3277.01	4317.45	5635.2	6328.48	4417.52	5930	6324.58	6183.12	5578.02	6396.11	4565.63	4135.36	4436.86	6469.34	5820.67	6255.15	4459.98	3971.28	6714.03	6472.44	5228.02	4826.44	4583.66	4265.38	4632.84	4578.63	4571.08	5176.89	6424.26	5620.57	4845.11	7450.44	5382.93	5853.52	5526.85	4500.23	4316.6	4410.23	5329.13	4838.79	4461.64	5930.69	5649.63	4604.4	4983.36	3623.84	6129.2	5760.09
MA0058.4	MAX	0	0	0	0	0	0	0	0	0	0	0	0	0	0	0	0	0	0	0	0	0	0	0	0	0	0	0	0	0	0	0	0	0	0	0	0	0	0	0	0	0	0	0	0	0	0	0	0
MA0059.2	MAX::MYC	2671.44	2703.7	6830.05	2722.96	1952.93	3277.59	3257.95	3117.04	3768.63	3256.14	2423.7	2239.57	2038.89	3842.89	3034.37	3876.02	2048.67	2707.41	3956.85	3203.08	3292.65	2615.94	3564.88	3017.9	3339.3	3042.28	3599.57	3460.52	3136.38	3490.02	3331.65	4188.89	3775.29	3019.63	3576.58	3500.45	4489.17	3483.04	2980.7	3903.82	3402.27	3097.92	3273.68	3388.35	3293.7	3125.73	3189.99	2901.95
MA0060.4	NFYA	4328.98	4477.03	4961.34	7797.66	3646.43	4437.29	4096.51	4146.6	3719.08	4647.8	5758.79	5764.59	5375.36	4057.58	4449.79	4889.13	5652.41	4357.16	4465.57	4164.96	3751.21	2570.11	2210.43	2303.35	2447.39	2162.19	2349.56	2312.06	2675.43	2650.43	2787.62	3295.58	2782.7	3000.48	2529.24	2493.4	2386.77	2637.73	2371.99	2534.82	2738.31	2862.23	2637.58	2502.47	2461.51	2165.91	2735.89	3087.62
MA0062.4	GABPA	8078.34	6209.31	8848.3	8501.6	6921.74	10447.4	10581.1	10068.2	10369.3	11241.3	8004.23	7674.07	7762.37	10216.6	10264.3	9554.23	8036.02	9112.7	9806.53	10228.9	10743.4	10118.2	9605.38	9630.55	9268.36	9391.96	9779.18	10196	11812.7	10953.7	10766	14298.4	10725	10782.2	10533.3	10072.9	10409.9	10101.7	10974.4	10423.3	10640.3	10962.8	11278	9879.98	9948.47	9184.12	11184.2	10335.2
MA0063.3	NKX2-5	3392.94	2162.03	3070.24	2944.48	2608.71	3726.2	3670.65	3553.15	2961.53	3803.36	2761.52	2734.07	2489.27	3253.19	3639.39	3308	2576.26	2626.17	3282.62	3578.81	3090.38	3652.44	3088.22	2914.11	3249.3	3235.68	3156.23	3370.91	3566.17	3303.3	3636.39	4418.19	3330.12	3546.19	3305.96	3447.19	3057.59	3303.8	3365.56	3492.89	3603.15	3405.8	3468.26	3334.22	3230.55	2792.73	3502.89	3242.01
MA0065.3	Pparg::Rxra	5605.88	6854.28	9307.38	9048.82	6287.57	10242.7	10370.5	10041.6	10774.6	11076.1	6517.81	7434.92	6295.59	10315.5	10290.3	9749.52	6344.96	7491.06	10351.4	10437.4	9703.27	8720.38	8474.15	8490.85	8869.42	8122.89	8812.46	9239.41	9972.16	9646.59	8516.26	12830	8766.53	9618	9848.94	7998.26	9325.9	8284.95	9171.84	8470.19	8561.7	10106.9	9688.58	8770.38	9135.92	7983.64	9675.01	9143.96
MA0066.2	PPARG	2052.03	2875.21	3394.07	4527.47	2599.7	3529.47	3581.77	3421.08	3824.74	3777.5	2049.93	2534.77	2083.92	3481.47	3789.1	2870.83	2197.25	2504.31	3691.12	3533.29	3350.12	2975.54	2606.53	2457.04	2605.89	2720.67	2658.46	3035.21	2906.44	2855.96	3196.67	4097.53	2875.51	2657.73	3011.93	2711.27	2639.54	2657.64	2686.17	2654.87	3057.6	2782.68	2859.97	2850.69	2926.02	2297.43	2915.49	2630.74
MA0067.3	PAX2	1205.96	862.827	1593.46	1307.2	700.821	1219.62	1430.65	1267.56	1205.87	1315.43	902.776	696.284	800.947	1202.37	1170.44	1498.86	802.091	837.374	1465.56	1381.93	1340.05	1163.42	1161.44	1061.86	1245.18	1195.18	1272.41	1282.23	976.694	1144.53	1235.31	1316.68	1313.49	926.759	962.776	1140.19	1205.54	1274.61	915.024	1140.44	1173.56	944.255	1030.18	1185.38	1317.76	973.819	1057.3	782.337
MA0068.2	PAX4	2875.61	1525.67	1790.61	3623.91	2293.43	2283.87	2412.4	2261.22	2981.23	2213.86	1980.93	2182.27	2004.8	4445.24	3536.08	1603.94	2160.74	2223.1	1452.65	2410.89	1760.68	1998.97	2502.47	2353.25	2309.03	2266.5	2461.6	2497.58	2688.33	2362.95	2515.61	3152.27	2202.25	2558.16	2485	2265.85	2527.74	2376.61	2534.97	2313.2	2448.62	2421.77	2425.01	2201.16	2352.04	2244.26	2652.3	2511.82
MA0069.1	PAX6	2432.67	1528.99	2844.03	2961.99	1902.49	2346.97	2471.65	2330.36	2253.54	2471.14	2153.44	1936.89	1898.9	2449.74	3031.9	2205.66	1925.27	2026.26	1964.13	2444.43	2601.94	2626.51	2588.06	2682.58	2793.94	2690.25	2637.66	2681.84	2632.45	2589.98	2979.87	3407.24	2716.63	2594.54	2470.69	2720.96	2556.9	2889.99	2425.01	2784.15	2784.83	2476.28	2514.94	2893.99	2757.62	2563.27	2628.58	2442.98
MA0070.2	PBX1	4924.17	3610.89	3565.99	4708.71	4208.53	3686.43	3630.33	3561.13	3670.13	3989.4	6289.24	6044.84	6130.05	3491.79	4141.72	3977.13	5928.17	3815.05	3500.13	3647.88	4146.56	3335.14	3511.17	3526.88	3309.75	3572.51	3722.81	3663.71	4165.72	3480.62	3867.49	5929.54	3732.82	3607.47	3655.95	3776.42	3458.63	3525.09	3899.65	3458.26	4165.61	3731.35	3919.58	3599.45	3776.46	3131.33	4156.92	3700.98
MA0071.1	RORA	4778.84	3988.34	5104.2	5331.23	4776.03	5062.48	5704.92	5114.11	5041.95	5553.04	4545.51	4849.08	4367.48	4663.22	5781.08	4880.21	4456.2	4158.75	4972.58	5207.9	4608.56	4764.74	4521.56	4508.89	4904.17	4785.07	4662.31	4675.86	4793.21	4639.93	5182.57	6173.76	4785.18	4599.33	5061.08	4609.17	4683.61	4684.62	4773.44	4501.74	5002.96	4541.56	4939.95	4535.84	5021.25	4424.16	5024.46	4479.14
MA0072.2	RORA	3501.94	2828.19	3854.58	4264.81	4476.97	4172.69	4349.56	4219.29	4322.01	4392.79	3736.17	3815.24	3639.56	4040.23	5659.21	3270.33	3712.03	3230.77	3307.25	4267.98	3643.18	3631.29	3759.58	3886.15	3955.84	4135.33	3833.24	3923.69	3978.76	3777.5	4074.06	5152.67	3976.64	3645.76	3917.46	3977.34	3876.68	3872.5	3793.62	3714.51	3983.76	3662.12	3857.44	3981.94	4189.05	3962.44	4219.05	3586.23
MA0073.2	RREB1	10646	18008.1	12653.4	10034.7	9888.97	11054.5	12217.5	13085.5	10517.9	13152.5	12164.5	11151.8	12161.5	11205.7	11474.3	16347.7	12731.5	7331.71	17176.4	12456.5	10535.3	13384.6	13638.5	8225.38	11960.2	13301.3	14451.1	15489	15115.7	12696	14799.1	23599.3	12463.2	13736.7	13810.6	11377.7	8130.08	10258.8	12914.4	10425.6	11949.2	14194.8	14519	14112.7	11643.7	7429.57	14865.5	12131.4
MA0074.1	RXRA::VDR	3152.44	2439.49	3448.84	3389.26	2655.55	3256.91	3622.92	3344.85	2943.03	3599.17	1982.37	1889.56	1869.69	3155.22	3195.83	2782.6	1939.12	2137.18	2857.24	3415.5	2307.73	3800.51	2467.22	2235.48	2511.86	2386.02	2533.62	2824.45	2567.98	2447.58	2599.46	3318.27	2464.95	2293.92	2637.22	2311.84	2571.49	2500.53	2246.33	2479.42	2558.57	2449.76	2547.65	2601.7	2396.95	1992.41	2533.69	2200.98
MA0075.4	PRRX2	4472.59	2856	3554.08	5648.18	3480.69	3871.5	4420.74	3746.83	4838.98	3943.57	3764.92	3811.5	3848.93	3910.39	4013.66	2806.39	3878.24	3538.53	2571.36	3818.38	3131.76	3724.71	4380.58	4403.11	4227.18	4222.25	4505.46	4538.3	4623.45	4149.61	4765.34	5650.68	4138.66	4662.52	4392.34	4185.53	4440.56	4394.74	4628.14	4210.86	4482.79	4344.16	4428.13	4036.07	4298.51	4121.94	4730.76	4474.97
MA0076.3	ELK4	3912	2334.2	4374.15	3820.9	2469.99	3432.96	3942.63	3512.82	3263	3560.6	3348.03	2832.47	3228.13	4295.24	3366.57	4989.25	2956.53	3397.93	4293.87	3634.71	4058.07	2489.02	2104.69	2600.75	2161.27	2088.31	2178.31	2267.89	3125.63	2579.23	2601.51	2988.06	2682.03	2320.73	2364	2510.35	2525.31	2693.05	2287.56	2798	2541.66	2323.07	2465.89	2381.59	2377.3	2647.22	2394.75	2234.35
MA0077.2	SOX9	4953.59	3685.72	5213.26	8132.99	5730.88	5856.83	6053.01	5930.49	4594.83	6174.68	7031.02	7442.39	7066.11	5335.88	6378.67	5073.52	6954.4	5221.09	4705.64	6159	5325.71	3841.06	4105.32	3746.43	4135.84	3896.29	4172.56	3943.88	4367.72	3948.1	4485.15	5164.01	3975.06	4306.37	4072.28	4042.7	3473.21	4202.22	4274.7	3899.2	4446.84	3936.11	4184.48	4057.72	4285.88	3551.08	4206.63	4047.29
MA0078.3	Sox17	6898.34	4676.35	7148.65	9156.51	6795.62	7404.68	7649.48	7525.13	6433.47	7826.8	7534.16	6672.62	6724.06	6766.54	7960.51	6818.22	7008.54	6678.69	5732.74	7681.08	6955.37	6028.64	6121.06	5580.73	5931.75	5886.81	6333.26	5786.46	6858.35	6217.02	6775.79	8117.43	6311.02	6504.55	6112.32	6175.41	5398.18	6565.55	6299.14	6166.23	6935.63	6304.85	6349.49	6303.99	6529.87	5140.53	6368.68	6344.23
MA0079.5	SP1	4213.06	10177.8	8910.69	7654.07	6213.71	8898.45	10925.5	9633	7972.44	9687.19	6148.37	7035.09	6526.87	10105	8352.72	11351.5	6239.19	6117.83	12926.6	10163.4	8656.29	5933.45	5746.78	6369.13	6568.45	5749.91	6118.79	6312.73	6872.31	6116.27	5503.66	7705.41	5876.87	5694.59	6103.22	4747.15	5998.52	5490.1	5513.71	5808.4	5117.14	6119.24	6313.52	5733.85	6135.52	4871.89	6271.53	5589.02
MA0080.7	Spi1	10062.9	7929.67	10663.2	10222.9	10588	12514.4	12614.2	12270.1	11790.6	13572.7	14809.6	13707.7	14729.9	12831.8	13819.5	15301.8	15140.3	12879.3	11595.2	12557.6	14359	12589.6	12485.5	12648.5	12817.2	12138.7	12749.7	13385.2	13564.1	13266.9	13801.1	18941.1	13705.9	13250.4	13187.4	13670.1	13246.3	12856.7	12804.5	12946.5	13681	13531.9	13168.3	12783	13082.2	11646.6	13685.1	12602.9
MA0081.3	SPIB	8083.53	6153.69	8870.68	9223.93	7842.35	10712.5	10796.8	10379.8	10390.7	11606.1	10124.6	8959.52	9014.92	10391.9	11728	10536.6	9366.96	9100.2	9722.31	10480.5	11052.5	10208.1	9838.67	10291.2	10079.7	9598.4	10022.5	10577.2	11052	10539.9	11445	14276.3	11256.7	10341.8	10837.7	10685.3	10293.2	10683.7	10244	10905.7	11183.7	10576.8	10699.1	10249.9	10637.5	9598.27	10789.9	9930.47
MA0083.3	SRF	2301.18	2166.67	3094.52	7286.33	2574.48	2658.24	2562.58	2532.01	2325.17	2836.87	2281.38	2324.27	2037.67	2453.02	3250.89	2190.79	2117.92	2254.35	2420.68	2549.05	2658.26	1917.88	2123.15	2163.63	2086.05	2162.19	2003.85	2202.26	2213.41	2066.07	2611.74	2768.31	2186.52	2035.42	2138.92	2190.81	2133.99	2018.13	1904.66	1872.26	1998.22	1822.22	2009.66	2136.21	2280.47	1712.58	2058.13	1896.39
MA0084.2	SRY	10050.8	6728.46	8000.14	14026.3	9386.32	8399.47	8314.82	8130.1	7113.41	8701.63	10304.3	9817.73	10498.7	7618.74	8241.36	7669.75	10456.1	7494.19	6746.07	8255.25	7562.18	7389.49	8527.86	8059.72	8177.65	8062.05	8950.11	7659.33	8792.39	8037.26	9039.83	10799.8	8167.21	9194.83	8127.65	8678.5	7595.37	8501.81	8759.49	7973.85	9344.08	8772.29	8671.48	7566.96	8451.08	7356.81	9294.34	8783.04
MA0087.3	Sox5	6612.86	3940.66	5911.88	8702.1	6091.2	6040.83	6198.67	6115.75	5181.64	6449.2	6825.45	6473.33	6542.69	5575.89	6195.56	5740.67	6546.42	5527.3	4809.32	6240.85	5961.25	4824.68	5172.77	4648.61	4922.98	4817.67	5062.44	4629.17	5506.66	4889.79	5248.01	6300.95	5016.41	5317.38	4847.71	4994.07	4246.11	5175.88	5189.72	4958.84	5531.59	4952.55	5160.7	5091.55	5209.3	4121.94	5157.75	5242.7
MA0088.3	ZNF143	2266.57	1864.71	3932.21	3899.7	4305.82	3251.08	3217.22	3133.44	3095.85	3527.03	2935.46	2989.41	2872.7	3247.09	3278.11	4132.76	2957.79	2141.87	3365.28	3242.21	3914.41	2614.17	2537.71	2315.32	2678.42	2585.94	2693.67	2763.87	3199.77	3013.13	3006.46	4828.42	2788.99	2929.63	2896.13	2609.6	2398.92	2675.35	2910.01	2696.43	2803.86	3081.72	2992.42	2509.69	2813.75	2090.35	3127.86	2937.42
MA0089.3	MAFG::NRF1	4638.69	3207.62	3984.59	4147.48	4192.32	5603.36	5545.68	5231.56	5394.16	5941.9	4154.5	4008.31	3851.36	5242.13	6160.3	5337.2	4171.63	4452.46	4819.31	5519.74	5228.02	6241.94	5812.24	5872.14	5863.25	5932.45	5989.15	5744.81	6343.67	6153.88	6532.41	8135.35	6491.92	6165.63	6057.68	6473.17	6071.43	6280.09	6193.11	6348.61	6844.71	6126.61	6025.72	6036.97	6282.87	5490.32	6264.76	6106.4
MA0090.4	TEAD1	5566.08	4590.27	6110.47	7196.15	5743.49	6966.15	6905.97	6584.21	5709.36	7538.66	6407.12	5672.41	5929.2	6690.6	6988.64	7158.24	6338.66	7359.83	6044.8	6892.49	8511.48	7625.7	5689.71	5884.11	6019.06	5917.24	5877.11	5932.86	7999.43	7311.85	7064.16	9718.95	6705.86	7762.57	7275.46	6877.44	6234.28	6300.01	7754.15	6480.19	7047.7	7876.65	7762.31	6632.36	6040.09	4922.26	8011.12	7783.73
MA0091.2	TAL1::TCF3	6543.65	6019.92	7080.07	6682.2	7750.47	8131.15	7830.53	7473.28	7755.15	8336.36	7401.9	6802.16	6777.62	7663.74	7804.61	8716.57	6768.04	7576.99	8610.65	7624.78	7646.08	7645.09	7789.37	7634.58	7780.05	7814.32	7810.54	7819.61	8534.52	7701.42	8612.39	10610.5	8052.38	7707.04	7866.14	7884.48	7177.32	7924.25	8113.48	8795.7	8534.21	7847.19	8092.62	7758.2	7972.53	7032.2	8208.8	7744.09
MA0092.2	Hand1::Tcf3	4996.84	5060.42	7043.88	6039.55	6554.21	6985.24	6775.54	6691.47	7123.56	7381.21	6579.63	5988.79	6229.86	7509.05	7185.98	6273	6321.03	7464.51	6583.49	6940.4	7182.93	6673.81	6542.33	6730.4	7053.36	6897.29	6558.93	6914.73	7435.34	7009.6	7008.94	9309.31	6460.46	7161.32	6911.17	6272.24	6363.1	6253.54	7298.6	6826.48	6848.94	8057.84	7103.32	6879.54	6934.04	6058.38	7366.11	6584.15
MA0093.4	USF1	4702.71	3214.91	6417.16	4665.81	4322.03	4755.46	5009.55	4705.48	5041.95	5116.07	6236.06	6043.6	6128.83	4779.47	5557.76	7377.32	6144.75	3324.5	4179.01	4801.42	4468.35	3603.08	3586.7	3766.39	3844.36	3781.12	3617.17	3522.36	3877.76	3952.13	3546.4	4807.52	3909	3622.79	3968.2	3631.17	3451.34	3936.68	3760.24	3804.55	3795.57	3812.37	3867.25	3622.9	3803.12	3559.48	3777.38	3644.65
MA0095.4	Yy1	8111.22	8969.96	7562.01	12348.8	7842.35	8226.07	8401.22	8106.61	8435.69	8538.28	9122.64	8898.49	8633.92	9355.96	8604.5	8339.88	8675.68	9664.18	9460.54	8319.54	9881.41	7322.51	6997.17	7428.99	7532.9	7288.44	7162.33	7211.3	7979.02	7291.7	7970.19	9368.43	7424.73	7609.38	7462.81	7463.26	7162.74	7377.67	7172.93	7179.7	7627.08	7327.18	7876.77	7215.13	7683.43	6315.83	7851.84	7514.61
MA0098.4	ETS1	3181.85	1774.66	3593.13	2936.6	2399.73	2818.91	3097.48	2792.62	2323.38	2989.78	3125.22	2815.03	3295.08	3287.41	2845.07	3857.18	3019.49	2713.66	3224.24	2927.17	2676.65	2196.4	1904.96	2403.15	1914.12	1862.31	1963.84	1987.72	3019.26	2317.28	2241.55	2699.64	2331.24	2125.42	2187.06	2287.64	2328.44	2336.78	2051.93	2290.12	2171.61	2062.34	2254.94	2199.36	2058.74	2350.6	2250.16	1944.37
MA0099.4	FOS::JUN	3844.52	2625.56	2864.98	3537.23	3682.46	4237.38	4140.13	4069.48	3599.09	4388.25	3754.86	3617.19	3497.15	3900.54	4514.75	3300.07	3669.22	3094.85	3228.89	4117.44	3982.21	4248.25	3976.09	4063.79	4283.6	4350.46	4178.96	4222.79	4464.42	4369.92	4667.17	5350.32	4866.98	4112.97	4290.86	4468.76	4216.95	4509.81	4474.98	4504.05	4647.72	4195.38	4400.33	4232.73	4574.98	4057.58	4282.31	4266.35
MA0100.4	MYB	0	0	0	0	0	0	0	0	0	0	0	0	0	0	0	0	0	0	0	0	0	0	0	0	0	0	0	0	0	0	0	0	0	0	0	0	0	0	0	0	0	0	0	0	0	0	0	0
MA0101.1	REL	3005.37	3579.11	7044.35	5707.72	4332.84	5464.43	6126.25	5655.26	4775.71	5705.04	4180.37	4264.9	3993.78	6080.27	5675.29	5939.92	4072.16	4796.16	5860.87	5750.13	5352.14	4334.63	4333.58	4337.24	4839.7	4339.6	4391.83	4863.91	6647.75	5812.67	4256.09	7614.65	4841.81	5851.6	5637.44	4076.59	4822.15	4115.92	5770.94	4296.27	4184.64	6220.89	6046.98	4970.66	4581.99	3937.25	6579.91	5605.71
MA0102.5	CEBPA	5941.54	4349.23	5299.93	7592.78	5521.9	5454.88	5425.95	5370.28	5303.42	5706.86	6115.3	5524.19	5722.27	7056.7	5492.18	5241.05	5867.73	5628.84	4195.19	5536.51	6175.02	5691.95	5778.67	5906.07	5978.77	5808.58	5933.13	5698.12	6558.57	5593.71	5865.67	7833.2	5607.88	6039.25	5628.33	5814.71	5986.36	5804.33	5772.9	5868.42	6132.12	5787.8	5930.88	5688.75	5937.65	5425.96	6293	5647.43
MA0103.4	ZEB1	0	0	0	0	0	0	0	0	0	0	0	0	0	0	0	0	0	0	0	0	0	0	0	0	0	0	0	0	0	0	0	0	0	0	0	0	0	0	0	0	0	0	0	0	0	0	0	0
MA0104.5	MYCN	1941.29	1828.95	6440.5	2152.1	1012.5	2190.01	2468.77	2238.17	2304.28	2101.79	1727.93	1355.2	1509.38	2768.49	2110.76	2767.73	1485.82	1515.4	2926.65	2192.88	2307.73	1752.18	3098.29	2279.4	2654.24	2251.29	2996.17	2993.56	2402.52	2748.49	2683.32	3189.89	3407.2	2309.24	2893.53	2895.25	4024.94	3067.02	2183.49	3236.63	3061.83	2465.96	2632.68	2215.6	2610.26	2473.72	2363.12	2031.99
MA0105.4	NFKB1	3109.18	3399	7161.98	5659.56	3073.53	5996.29	6347.62	5879.08	6007.84	6510	3044.71	3987.13	2936	5784.96	5049.24	5085.41	3006.9	3074.54	8668.17	5886.68	4652.24	3481.45	3736.08	3391.15	4149.27	3624.66	3621.98	4751.59	5124.15	4841.43	3327.56	6084.19	3743.83	4377.21	5093.6	3643.27	3354.11	3339.2	4626.18	3372.84	3370.55	4861.22	4719.19	3850.23	4221.33	2927.05	5097.88	4497.92
MA0106.3	TP53	2652.41	1885.9	3250.25	3117.84	2504.22	2994.96	2877.76	2959.7	4046.81	3228.91	2175	2298.11	2002.37	2987.4	2822.18	2647.78	2036.08	2744.9	3038.42	3047.36	3619.05	3414.47	3036.19	3089.76	3407.8	3342.16	3157.83	3158.89	3054.72	2956.71	3076	4491.04	3264.05	2816.66	3013.23	3050.18	3084.33	2991.79	2868.78	3026.55	2987.82	2756.16	2982.61	3314.38	3397.55	2761.95	3349.26	2845.62
MA0107.1	RELA	5092	5089.55	6932.44	7113.85	5561.53	6459.74	6866.47	6675.07	6009.63	6838.07	5029.96	5494.29	4777.69	7704.52	6805.53	7309.91	4838.99	5730.39	7686.02	6766.31	6594.5	5660.22	5374.18	5257.38	6076.82	5699.93	5681.85	6046.44	8433.52	7426.04	5636.6	10076.6	6200.91	7705.12	7186.99	5761.46	5706.86	5359.55	7467.46	5863.8	5764.19	7838.35	7973.25	6049.59	5933.44	4944.65	8607.54	7347.71
MA0108.3	TBP	0	0	0	0	0	0	0	0	0	0	0	0	0	0	0	0	0	0	0	0	0	0	0	0	0	0	0	0	0	0	0	0	0	0	0	0	0	0	0	0	0	0	0	0	0	0	0	0
MA0111.1	Spz1	3050.36	3900.27	4996.1	5247.18	3116.76	5225.8	5209.93	5268.35	5320.73	5714.57	3007.34	3415.41	2927.48	5188.69	5146.37	4818.75	2979.2	3565.09	5329.58	5437.49	4195.98	5429.3	4597.09	4610.69	4853.13	4719.88	4659.11	4929.53	5146.71	4940.84	4812.38	6450.83	4697.09	4928.67	4803.47	4384.03	4610.69	4443.42	4798.97	4820.32	4533.54	5011.48	4923.6	4840.76	5053.52	4253.46	4873.09	4758.7
[truncated: 940 more rows]
[truncated: 57 more columns]

## Sheet: Density in G4s Promoters
Motif_ID	Motif_Name	Erpetoichthys_calabaricus	Latimeria_chalumnae	Leptobrachium_leishanense	Xenopus_tropicalis	Anolis_carolinensis	Chelonoidis_abingdonii	Chelydra_serpentina	Chrysemys_picta_bellii	Crocodylus_porosus	Gopherus_evgoodei	Laticauda_laticaudata	Naja_naja	Notechis_scutatus	Pelodiscus_sinensis	Pelusios_castaneus	Podarcis_muralis	Pseudonaja_textlis	Salvator_merianae	Sphenodon_punctatus	Terrapene_carolina_triunguis	Varanus_komodoensis	Amazona_collaria	Anas_platyrhynchos	Apteryx_haastii	Aquila_chrysaetos	Athene_cunicularia	Cairina_moschata_domestica	Calidris_pugnax	Catharus_ustulatus	Corvus_moneduloides	Coturnix_japonica	Ficedula_albicollis	Gallus_gallus	Geospiza_fortis	Manacus_vitellinus	Meleagris_gallopavo	Nothoprocta_perdicaria	Numida_meleagris	Parus_major	Pavo_cristatus	Phasianus_colchicus	Serinus_canaria	Stachyris_ruficeps	Strigops_habroptila	Strix_occidentalis_caurina	Struthio_camelus_australis	Taeniopygia_guttata	Zonotrichia_albicollis
[truncated: 1,019 more rows]
[truncated: 57 more columns]

[truncated: 3 more sheets: Density in G4-free promoters, Density in G4genome- background, Density inG4promoter-background]
