# Supplementary material for: CGGBP1-regulated heterogeneous C–T transition rates relate with G-quadruplex potential of terrestrial vertebrate genomes
Source: bioRxiv preprint, doi:10.64898/2025.12.10.693595, version 2 (2026-03-24)
Supplement: Table S19 [file 693595_file47.xlsx]

## Sheet: TFBS mean GC content raw
Motif_ID	Enrichment_Tier	Category	Thermal_Group	Species	Mean_GC	Hit_Count
MA0073.2	Highly_Reduced	Promoter_G4	Poikilotherm	Leptobrachium_leishanense	70.8721	15785
MA2688.1	Highly_Reduced	Promoter_G4	Poikilotherm	Leptobrachium_leishanense	72.7853	9344
MA1721.2	Moderately_Enriched	Promoter_G4	Poikilotherm	Leptobrachium_leishanense	82.2967	1532
MA2494.1	Moderately_Reduced	Promoter_G4	Poikilotherm	Leptobrachium_leishanense	70.5697	1776
MA0163.1	Highly_Reduced	Promoter_G4	Poikilotherm	Leptobrachium_leishanense	80.1182	12907
MA2538.1	Moderately_Enriched	Promoter_G4	Poikilotherm	Leptobrachium_leishanense	88.8131	990
MA1987.2	Highly_Reduced	Promoter_G4	Poikilotherm	Leptobrachium_leishanense	74.7847	10094
MA2545.1	Highly_Enriched	Promoter_G4	Poikilotherm	Leptobrachium_leishanense	64.3032	714
MA1654.2	Moderately_Reduced	Promoter_G4	Poikilotherm	Leptobrachium_leishanense	66.4956	1197
MA2528.1	Highly_Enriched	Promoter_G4	Poikilotherm	Leptobrachium_leishanense	70.5489	1084
MA1712.2	Highly_Enriched	Promoter_G4	Poikilotherm	Leptobrachium_leishanense	80.6647	2345
MA2553.1	Moderately_Enriched	Promoter_G4	Poikilotherm	Leptobrachium_leishanense	78.5491	583
MA0506.3	Highly_Enriched	Promoter_G4	Poikilotherm	Leptobrachium_leishanense	82.3333	525
MA2531.1	Moderately_Reduced	Promoter_G4	Poikilotherm	Leptobrachium_leishanense	65.6696	3604
MA0258.2	Highly_Enriched	Promoter_G4	Poikilotherm	Leptobrachium_leishanense	68.4951	711
MA0741.1	Highly_Reduced	Promoter_G4	Poikilotherm	Leptobrachium_leishanense	90.5704	27860
MA0736.1	Moderately_Reduced	Promoter_G4	Poikilotherm	Leptobrachium_leishanense	79.2159	5076
MA0747.2	Highly_Reduced	Promoter_G4	Poikilotherm	Leptobrachium_leishanense	89.6366	28762
MA1714.2	Highly_Reduced	Promoter_G4	Poikilotherm	Leptobrachium_leishanense	59.3873	1005
MA0080.7	Highly_Reduced	Promoter_G4	Poikilotherm	Leptobrachium_leishanense	60.2065	1594
MA0472.2	Moderately_Enriched	Promoter_G4	Poikilotherm	Leptobrachium_leishanense	78.5676	674
MA0145.2	Highly_Enriched	Promoter_G4	Poikilotherm	Leptobrachium_leishanense	71.6931	405
MA2524.1	Moderately_Enriched	Promoter_G4	Poikilotherm	Leptobrachium_leishanense	60.8254	300
MA2573.1	Highly_Enriched	Promoter_G4	Poikilotherm	Leptobrachium_leishanense	77.4427	378
MA0081.3	Highly_Reduced	Promoter_G4	Poikilotherm	Leptobrachium_leishanense	60.7679	1148
MA1114.2	Moderately_Enriched	Promoter_G4	Poikilotherm	Leptobrachium_leishanense	64.2778	907
MA1531.2	Moderately_Reduced	Promoter_G4	Poikilotherm	Leptobrachium_leishanense	67.2679	1382
MA2534.1	Moderately_Reduced	Promoter_G4	Poikilotherm	Leptobrachium_leishanense	69.0851	629
MA2328.1	Moderately_Enriched	Promoter_G4	Poikilotherm	Leptobrachium_leishanense	92.2819	3909
MA0111.1	Highly_Reduced	Promoter_G4	Poikilotherm	Leptobrachium_leishanense	65.4513	1132
MA0753.3	Highly_Reduced	Promoter_G4	Poikilotherm	Leptobrachium_leishanense	89.9521	62587
MA1713.2	Moderately_Enriched	Promoter_G4	Poikilotherm	Leptobrachium_leishanense	84.9409	2200
MA1630.3	Moderately_Reduced	Promoter_G4	Poikilotherm	Leptobrachium_leishanense	89.0224	39853
MA1653.2	Moderately_Reduced	Promoter_G4	Poikilotherm	Leptobrachium_leishanense	89.5502	34992
MA1564.2	Highly_Reduced	Promoter_G4	Poikilotherm	Leptobrachium_leishanense	94.0878	27753
MA0146.3	Moderately_Enriched	Promoter_G4	Poikilotherm	Leptobrachium_leishanense	78.7243	925
MA1516.2	Moderately_Enriched	Promoter_G4	Poikilotherm	Leptobrachium_leishanense	85.169	1834
MA2519.1	Highly_Reduced	Promoter_G4	Poikilotherm	Leptobrachium_leishanense	69.6255	824
MA1532.2	Highly_Reduced	Promoter_G4	Poikilotherm	Leptobrachium_leishanense	64.3614	937
MA1533.2	Highly_Enriched	Promoter_G4	Poikilotherm	Leptobrachium_leishanense	69.279	564
MA0729.1	Highly_Enriched	Promoter_G4	Poikilotherm	Leptobrachium_leishanense	59.3731	358
MA2539.1	Moderately_Enriched	Promoter_G4	Poikilotherm	Leptobrachium_leishanense	96.2744	1844
MA0728.1	Highly_Enriched	Promoter_G4	Poikilotherm	Leptobrachium_leishanense	58.1975	270
MA2340.1	Moderately_Enriched	Promoter_G4	Poikilotherm	Leptobrachium_leishanense	67.9714	350
MA1979.2	Highly_Enriched	Promoter_G4	Poikilotherm	Leptobrachium_leishanense	70.83	759
MA2489.1	Moderately_Enriched	Promoter_G4	Poikilotherm	Leptobrachium_leishanense	23.3223	101
MA1528.2	Highly_Enriched	Promoter_G4	Poikilotherm	Leptobrachium_leishanense	73.5485	529
MA0821.2	Moderately_Enriched	Promoter_G4	Poikilotherm	Leptobrachium_leishanense	81.3669	278
MA0646.2	Highly_Enriched	Promoter_G4	Poikilotherm	Leptobrachium_leishanense	69.5522	402
MA0685.2	Moderately_Reduced	Promoter_G4	Poikilotherm	Leptobrachium_leishanense	95.2596	35344
MA0079.5	Moderately_Reduced	Promoter_G4	Poikilotherm	Leptobrachium_leishanense	95.1816	36121
MA2493.1	Moderately_Enriched	Promoter_G4	Poikilotherm	Leptobrachium_leishanense	67.2736	338
MA2582.1	Highly_Enriched	Promoter_G4	Poikilotherm	Leptobrachium_leishanense	59.6991	432
MA0478.2	Moderately_Enriched	Promoter_G4	Poikilotherm	Leptobrachium_leishanense	56.9792	96
MA1553.2	Moderately_Enriched	Promoter_G4	Poikilotherm	Leptobrachium_leishanense	64.9922	98
MA2580.1	Moderately_Enriched	Promoter_G4	Poikilotherm	Leptobrachium_leishanense	57.2785	158
MA0814.3	Moderately_Enriched	Promoter_G4	Poikilotherm	Leptobrachium_leishanense	84.9238	1006
MA0812.2	Moderately_Enriched	Promoter_G4	Poikilotherm	Leptobrachium_leishanense	89.9212	1044
MA0857.1	Moderately_Enriched	Promoter_G4	Poikilotherm	Leptobrachium_leishanense	59.7656	208
MA2593.1	Moderately_Enriched	Promoter_G4	Poikilotherm	Leptobrachium_leishanense	9.36585	410
MA0526.5	Moderately_Reduced	Promoter_G4	Poikilotherm	Leptobrachium_leishanense	66.0225	445
MA0620.4	Moderately_Reduced	Promoter_G4	Poikilotherm	Leptobrachium_leishanense	63.0435	322
MA0831.3	Moderately_Reduced	Promoter_G4	Poikilotherm	Leptobrachium_leishanense	63.3151	365
MA1474.2	Highly_Enriched	Promoter_G4	Poikilotherm	Leptobrachium_leishanense	71.1228	285
MA1559.2	Moderately_Enriched	Promoter_G4	Poikilotherm	Leptobrachium_leishanense	68.939	577
MA0765.4	Highly_Reduced	Promoter_G4	Poikilotherm	Leptobrachium_leishanense	67.9012	81
MA0764.4	Highly_Reduced	Promoter_G4	Poikilotherm	Leptobrachium_leishanense	62.2834	109
MA0028.3	Highly_Reduced	Promoter_G4	Poikilotherm	Leptobrachium_leishanense	61.9342	108
MA0640.3	Moderately_Enriched	Promoter_G4	Poikilotherm	Leptobrachium_leishanense	59.4896	627
MA1580.1	Moderately_Reduced	Promoter_G4	Poikilotherm	Leptobrachium_leishanense	37.8571	42
MA0519.2	Moderately_Enriched	Promoter_G4	Poikilotherm	Leptobrachium_leishanense	49.3122	105
MA0469.4	Moderately_Reduced	Promoter_G4	Poikilotherm	Leptobrachium_leishanense	49.2857	20
MA1602.2	Moderately_Reduced	Promoter_G4	Poikilotherm	Leptobrachium_leishanense	56.4214	63
MA1513.2	Moderately_Enriched	Promoter_G4	Poikilotherm	Leptobrachium_leishanense	97.3514	3785
MA2602.1	Moderately_Enriched	Promoter_G4	Poikilotherm	Leptobrachium_leishanense	85.3626	848
MA2588.1	Highly_Enriched	Promoter_G4	Poikilotherm	Leptobrachium_leishanense	88.152	1342
MA1099.3	Moderately_Enriched	Promoter_G4	Poikilotherm	Leptobrachium_leishanense	76.4773	330
MA0781.2	Moderately_Reduced	Promoter_G4	Poikilotherm	Leptobrachium_leishanense	69.3359	96
MA1585.2	Moderately_Enriched	Promoter_G4	Poikilotherm	Leptobrachium_leishanense	57.0128	122
MA0632.3	Highly_Enriched	Promoter_G4	Poikilotherm	Leptobrachium_leishanense	86.7424	363
MA0131.3	Moderately_Enriched	Promoter_G4	Poikilotherm	Leptobrachium_leishanense	84.3344	308
MA0745.3	Highly_Enriched	Promoter_G4	Poikilotherm	Leptobrachium_leishanense	68.8515	616
MA1998.2	Moderately_Enriched	Promoter_G4	Poikilotherm	Leptobrachium_leishanense	56.1835	188
MA1645.2	Highly_Enriched	Promoter_G4	Poikilotherm	Leptobrachium_leishanense	58.6794	301
MA0807.1	Moderately_Enriched	Promoter_G4	Poikilotherm	Leptobrachium_leishanense	59.1919	529
MA0801.1	Moderately_Enriched	Promoter_G4	Poikilotherm	Leptobrachium_leishanense	58.4699	366
MA2597.1	Highly_Enriched	Promoter_G4	Poikilotherm	Leptobrachium_leishanense	46.904	323
MA0136.4	Moderately_Enriched	Promoter_G4	Poikilotherm	Leptobrachium_leishanense	47.619	273
MA1547.2	Moderately_Enriched	Promoter_G4	Poikilotherm	Leptobrachium_leishanense	42.2426	340
MA0837.3	Moderately_Reduced	Promoter_G4	Poikilotherm	Leptobrachium_leishanense	47.5	8
MA1125.2	Moderately_Enriched	Promoter_G4	Poikilotherm	Leptobrachium_leishanense	1.99115	339
MA2102.1	Moderately_Reduced	Promoter_G4	Poikilotherm	Leptobrachium_leishanense	37.5	12
MA1558.2	Highly_Enriched	Promoter_G4	Poikilotherm	Leptobrachium_leishanense	67.5404	654
MA1117.2	Highly_Reduced	Promoter_G4	Poikilotherm	Leptobrachium_leishanense	57.1429	756
MA1523.2	Highly_Enriched	Promoter_G4	Poikilotherm	Leptobrachium_leishanense	57.1429	261
MA0508.4	Highly_Enriched	Promoter_G4	Poikilotherm	Leptobrachium_leishanense	42.8571	311
MA0712.3	Highly_Enriched	Promoter_G4	Poikilotherm	Leptobrachium_leishanense	42.8571	325
MA0073.2	Highly_Reduced	Promoter_G4	Poikilotherm	Xenopus_tropicalis	72.8134	28819
MA1987.2	Highly_Reduced	Promoter_G4	Poikilotherm	Xenopus_tropicalis	76.9891	19421
MA2528.1	Highly_Enriched	Promoter_G4	Poikilotherm	Xenopus_tropicalis	68.0795	1650
MA0163.1	Highly_Reduced	Promoter_G4	Poikilotherm	Xenopus_tropicalis	81.0339	31052
MA0258.2	Highly_Enriched	Promoter_G4	Poikilotherm	Xenopus_tropicalis	70.634	899
MA2538.1	Moderately_Enriched	Promoter_G4	Poikilotherm	Xenopus_tropicalis	88.944	958
MA2688.1	Highly_Reduced	Promoter_G4	Poikilotherm	Xenopus_tropicalis	75.2533	17566
MA1721.2	Moderately_Enriched	Promoter_G4	Poikilotherm	Xenopus_tropicalis	80.908	2898
MA2531.1	Moderately_Reduced	Promoter_G4	Poikilotherm	Xenopus_tropicalis	65.5556	4230
MA0080.7	Highly_Reduced	Promoter_G4	Poikilotherm	Xenopus_tropicalis	60.9307	1886
MA2573.1	Highly_Enriched	Promoter_G4	Poikilotherm	Xenopus_tropicalis	75.2242	684
MA1712.2	Highly_Enriched	Promoter_G4	Poikilotherm	Xenopus_tropicalis	76.9547	3524
MA1654.2	Moderately_Reduced	Promoter_G4	Poikilotherm	Xenopus_tropicalis	65.6567	2579
MA2494.1	Moderately_Reduced	Promoter_G4	Poikilotherm	Xenopus_tropicalis	71.5413	2357
MA0506.3	Highly_Enriched	Promoter_G4	Poikilotherm	Xenopus_tropicalis	79.375	800
MA0741.1	Highly_Reduced	Promoter_G4	Poikilotherm	Xenopus_tropicalis	90.9035	42271
MA2545.1	Highly_Enriched	Promoter_G4	Poikilotherm	Xenopus_tropicalis	64.2857	973
MA0736.1	Moderately_Reduced	Promoter_G4	Poikilotherm	Xenopus_tropicalis	77.5148	8328
MA0747.2	Highly_Reduced	Promoter_G4	Poikilotherm	Xenopus_tropicalis	89.7104	42237
MA2519.1	Highly_Reduced	Promoter_G4	Poikilotherm	Xenopus_tropicalis	69.5067	1115
MA0081.3	Highly_Reduced	Promoter_G4	Poikilotherm	Xenopus_tropicalis	61.3137	1403
MA1114.2	Moderately_Enriched	Promoter_G4	Poikilotherm	Xenopus_tropicalis	60.0585	1616
MA1714.2	Highly_Reduced	Promoter_G4	Poikilotherm	Xenopus_tropicalis	58.1043	1808
MA1532.2	Highly_Reduced	Promoter_G4	Poikilotherm	Xenopus_tropicalis	63.9635	3539
MA1531.2	Moderately_Reduced	Promoter_G4	Poikilotherm	Xenopus_tropicalis	69.1648	3089
MA2534.1	Moderately_Reduced	Promoter_G4	Poikilotherm	Xenopus_tropicalis	67.7057	1222
MA2539.1	Moderately_Enriched	Promoter_G4	Poikilotherm	Xenopus_tropicalis	95.5383	2768
MA2328.1	Moderately_Enriched	Promoter_G4	Poikilotherm	Xenopus_tropicalis	91.7302	6300
MA2493.1	Moderately_Enriched	Promoter_G4	Poikilotherm	Xenopus_tropicalis	61.3215	780
MA0111.1	Highly_Reduced	Promoter_G4	Poikilotherm	Xenopus_tropicalis	64.3275	1960
MA0753.3	Highly_Reduced	Promoter_G4	Poikilotherm	Xenopus_tropicalis	89.4002	86836
MA1713.2	Moderately_Enriched	Promoter_G4	Poikilotherm	Xenopus_tropicalis	85.4147	3653
MA1630.3	Moderately_Reduced	Promoter_G4	Poikilotherm	Xenopus_tropicalis	88.9272	62685
MA1653.2	Moderately_Reduced	Promoter_G4	Poikilotherm	Xenopus_tropicalis	90.2692	50523
MA1564.2	Highly_Reduced	Promoter_G4	Poikilotherm	Xenopus_tropicalis	94.3759	39007
MA0145.2	Highly_Enriched	Promoter_G4	Poikilotherm	Xenopus_tropicalis	69.4352	1161
MA1528.2	Highly_Enriched	Promoter_G4	Poikilotherm	Xenopus_tropicalis	74.743	681
MA0729.1	Highly_Enriched	Promoter_G4	Poikilotherm	Xenopus_tropicalis	61.0725	432
MA0146.3	Moderately_Enriched	Promoter_G4	Poikilotherm	Xenopus_tropicalis	78.3498	812
MA1516.2	Moderately_Enriched	Promoter_G4	Poikilotherm	Xenopus_tropicalis	85.565	3416
MA0821.2	Moderately_Enriched	Promoter_G4	Poikilotherm	Xenopus_tropicalis	85.0467	214
MA1474.2	Highly_Enriched	Promoter_G4	Poikilotherm	Xenopus_tropicalis	79.9444	180
MA2553.1	Moderately_Enriched	Promoter_G4	Poikilotherm	Xenopus_tropicalis	79.0984	779
MA0728.1	Highly_Enriched	Promoter_G4	Poikilotherm	Xenopus_tropicalis	59.3315	359
MA0526.5	Moderately_Reduced	Promoter_G4	Poikilotherm	Xenopus_tropicalis	54.7541	122
MA0620.4	Moderately_Reduced	Promoter_G4	Poikilotherm	Xenopus_tropicalis	52.4731	186
MA2340.1	Moderately_Enriched	Promoter_G4	Poikilotherm	Xenopus_tropicalis	69.8228	508
MA0831.3	Moderately_Reduced	Promoter_G4	Poikilotherm	Xenopus_tropicalis	54.5614	171
MA2524.1	Moderately_Enriched	Promoter_G4	Poikilotherm	Xenopus_tropicalis	62.6691	461
MA2580.1	Moderately_Enriched	Promoter_G4	Poikilotherm	Xenopus_tropicalis	48.4479	451
MA1979.2	Highly_Enriched	Promoter_G4	Poikilotherm	Xenopus_tropicalis	63.5276	995
MA0781.2	Moderately_Reduced	Promoter_G4	Poikilotherm	Xenopus_tropicalis	66.4583	90
MA0472.2	Moderately_Enriched	Promoter_G4	Poikilotherm	Xenopus_tropicalis	76.7424	840
MA1580.1	Moderately_Reduced	Promoter_G4	Poikilotherm	Xenopus_tropicalis	36.9407	523
MA0685.2	Moderately_Reduced	Promoter_G4	Poikilotherm	Xenopus_tropicalis	94.837	50147
MA0079.5	Moderately_Reduced	Promoter_G4	Poikilotherm	Xenopus_tropicalis	94.7214	51544
MA0478.2	Moderately_Enriched	Promoter_G4	Poikilotherm	Xenopus_tropicalis	50.9292	226
MA0469.4	Moderately_Reduced	Promoter_G4	Poikilotherm	Xenopus_tropicalis	52.1429	60
MA0646.2	Highly_Enriched	Promoter_G4	Poikilotherm	Xenopus_tropicalis	66.0261	843
MA0814.3	Moderately_Enriched	Promoter_G4	Poikilotherm	Xenopus_tropicalis	84.7222	2208
MA0812.2	Moderately_Enriched	Promoter_G4	Poikilotherm	Xenopus_tropicalis	86.8156	2492
MA2582.1	Highly_Enriched	Promoter_G4	Poikilotherm	Xenopus_tropicalis	59.8563	1044
MA2593.1	Moderately_Enriched	Promoter_G4	Poikilotherm	Xenopus_tropicalis	7.70149	335
MA0857.1	Moderately_Enriched	Promoter_G4	Poikilotherm	Xenopus_tropicalis	61.9667	375
MA1559.2	Moderately_Enriched	Promoter_G4	Poikilotherm	Xenopus_tropicalis	68.7831	882
MA0765.4	Highly_Reduced	Promoter_G4	Poikilotherm	Xenopus_tropicalis	64.877	149
MA0764.4	Highly_Reduced	Promoter_G4	Poikilotherm	Xenopus_tropicalis	65.155	147
MA0028.3	Highly_Reduced	Promoter_G4	Poikilotherm	Xenopus_tropicalis	64.4592	151
MA0640.3	Moderately_Enriched	Promoter_G4	Poikilotherm	Xenopus_tropicalis	59.561	810
MA2489.1	Moderately_Enriched	Promoter_G4	Poikilotherm	Xenopus_tropicalis	32.3477	124
MA0519.2	Moderately_Enriched	Promoter_G4	Poikilotherm	Xenopus_tropicalis	51.3511	2463
MA1533.2	Highly_Enriched	Promoter_G4	Poikilotherm	Xenopus_tropicalis	70.4379	746
MA1553.2	Moderately_Enriched	Promoter_G4	Poikilotherm	Xenopus_tropicalis	66.684	148
MA1585.2	Moderately_Enriched	Promoter_G4	Poikilotherm	Xenopus_tropicalis	54.3997	1019
MA1513.2	Moderately_Enriched	Promoter_G4	Poikilotherm	Xenopus_tropicalis	97.2391	6565
MA2602.1	Moderately_Enriched	Promoter_G4	Poikilotherm	Xenopus_tropicalis	82.3805	2029
MA2588.1	Highly_Enriched	Promoter_G4	Poikilotherm	Xenopus_tropicalis	88.5187	1362
MA1099.3	Moderately_Enriched	Promoter_G4	Poikilotherm	Xenopus_tropicalis	82.568	147
MA0632.3	Highly_Enriched	Promoter_G4	Poikilotherm	Xenopus_tropicalis	93.0851	94
MA0745.3	Highly_Enriched	Promoter_G4	Poikilotherm	Xenopus_tropicalis	68.0751	926
MA1602.2	Moderately_Reduced	Promoter_G4	Poikilotherm	Xenopus_tropicalis	52.4476	65
MA1998.2	Moderately_Enriched	Promoter_G4	Poikilotherm	Xenopus_tropicalis	55.6959	485
MA1645.2	Highly_Enriched	Promoter_G4	Poikilotherm	Xenopus_tropicalis	60.109	1009
MA0807.1	Moderately_Enriched	Promoter_G4	Poikilotherm	Xenopus_tropicalis	58.0537	447
MA0801.1	Moderately_Enriched	Promoter_G4	Poikilotherm	Xenopus_tropicalis	58.959	293
MA2597.1	Highly_Enriched	Promoter_G4	Poikilotherm	Xenopus_tropicalis	44.4154	526
MA0136.4	Moderately_Enriched	Promoter_G4	Poikilotherm	Xenopus_tropicalis	47.6165	472
MA1547.2	Moderately_Enriched	Promoter_G4	Poikilotherm	Xenopus_tropicalis	40.433	537
MA0131.3	Moderately_Enriched	Promoter_G4	Poikilotherm	Xenopus_tropicalis	83.5332	271
MA0837.3	Moderately_Reduced	Promoter_G4	Poikilotherm	Xenopus_tropicalis	43.75	32
MA1125.2	Moderately_Enriched	Promoter_G4	Poikilotherm	Xenopus_tropicalis	1.60772	311
MA1558.2	Highly_Enriched	Promoter_G4	Poikilotherm	Xenopus_tropicalis	65.7709	909
MA1117.2	Highly_Reduced	Promoter_G4	Poikilotherm	Xenopus_tropicalis	57.1429	2309
MA1523.2	Highly_Enriched	Promoter_G4	Poikilotherm	Xenopus_tropicalis	57.1429	1194
MA0508.4	Highly_Enriched	Promoter_G4	Poikilotherm	Xenopus_tropicalis	42.8571	268
MA0712.3	Highly_Enriched	Promoter_G4	Poikilotherm	Xenopus_tropicalis	42.8571	520
MA2102.1	Moderately_Reduced	Promoter_G4	Poikilotherm	Xenopus_tropicalis	37.5	2
MA0073.2	Highly_Reduced	Promoter_G4	Poikilotherm	Erpetoichthys_calabaricus	79.6999	6176
MA2538.1	Moderately_Enriched	Promoter_G4	Poikilotherm	Erpetoichthys_calabaricus	89.9148	176
MA0163.1	Highly_Reduced	Promoter_G4	Poikilotherm	Erpetoichthys_calabaricus	88.343	4872
MA2688.1	Highly_Reduced	Promoter_G4	Poikilotherm	Erpetoichthys_calabaricus	85.2321	3092
MA1721.2	Moderately_Enriched	Promoter_G4	Poikilotherm	Erpetoichthys_calabaricus	84.2911	266
MA0728.1	Highly_Enriched	Promoter_G4	Poikilotherm	Erpetoichthys_calabaricus	62.1569	68
MA0741.1	Highly_Reduced	Promoter_G4	Poikilotherm	Erpetoichthys_calabaricus	92.7005	8632
MA2531.1	Moderately_Reduced	Promoter_G4	Poikilotherm	Erpetoichthys_calabaricus	65.8184	503
MA0747.2	Highly_Reduced	Promoter_G4	Poikilotherm	Erpetoichthys_calabaricus	91.777	8977
MA1714.2	Highly_Reduced	Promoter_G4	Poikilotherm	Erpetoichthys_calabaricus	62.2612	135
MA0729.1	Highly_Enriched	Promoter_G4	Poikilotherm	Erpetoichthys_calabaricus	63.0159	70
MA1712.2	Highly_Enriched	Promoter_G4	Poikilotherm	Erpetoichthys_calabaricus	81.7733	274
MA0472.2	Moderately_Enriched	Promoter_G4	Poikilotherm	Erpetoichthys_calabaricus	80.5665	138
MA1987.2	Highly_Reduced	Promoter_G4	Poikilotherm	Erpetoichthys_calabaricus	85.4441	3060
MA0081.3	Highly_Reduced	Promoter_G4	Poikilotherm	Erpetoichthys_calabaricus	63.3559	182
MA2519.1	Highly_Reduced	Promoter_G4	Poikilotherm	Erpetoichthys_calabaricus	70.8181	117
MA0857.1	Moderately_Enriched	Promoter_G4	Poikilotherm	Erpetoichthys_calabaricus	62.6582	79
MA1531.2	Moderately_Reduced	Promoter_G4	Poikilotherm	Erpetoichthys_calabaricus	69.5238	165
MA2328.1	Moderately_Enriched	Promoter_G4	Poikilotherm	Erpetoichthys_calabaricus	92.1206	929
MA0080.7	Highly_Reduced	Promoter_G4	Poikilotherm	Erpetoichthys_calabaricus	62.7682	294
MA0753.3	Highly_Reduced	Promoter_G4	Poikilotherm	Erpetoichthys_calabaricus	91.009	15342
MA1713.2	Moderately_Enriched	Promoter_G4	Poikilotherm	Erpetoichthys_calabaricus	87.7219	338
MA1630.3	Moderately_Reduced	Promoter_G4	Poikilotherm	Erpetoichthys_calabaricus	91.4177	11088
MA1653.2	Moderately_Reduced	Promoter_G4	Poikilotherm	Erpetoichthys_calabaricus	93.4397	9213
MA1564.2	Highly_Reduced	Promoter_G4	Poikilotherm	Erpetoichthys_calabaricus	95.1839	8536
MA1516.2	Moderately_Enriched	Promoter_G4	Poikilotherm	Erpetoichthys_calabaricus	86.3451	539
MA0821.2	Moderately_Enriched	Promoter_G4	Poikilotherm	Erpetoichthys_calabaricus	74.6154	52
MA2539.1	Moderately_Enriched	Promoter_G4	Poikilotherm	Erpetoichthys_calabaricus	96.8661	351
MA1528.2	Highly_Enriched	Promoter_G4	Poikilotherm	Erpetoichthys_calabaricus	80.6931	101
MA0506.3	Highly_Enriched	Promoter_G4	Poikilotherm	Erpetoichthys_calabaricus	84.6154	65
MA2553.1	Moderately_Enriched	Promoter_G4	Poikilotherm	Erpetoichthys_calabaricus	78.6181	63
MA0526.5	Moderately_Reduced	Promoter_G4	Poikilotherm	Erpetoichthys_calabaricus	65	28
MA0620.4	Moderately_Reduced	Promoter_G4	Poikilotherm	Erpetoichthys_calabaricus	56.6667	30
MA2340.1	Moderately_Enriched	Promoter_G4	Poikilotherm	Erpetoichthys_calabaricus	68.6364	88
MA0831.3	Moderately_Reduced	Promoter_G4	Poikilotherm	Erpetoichthys_calabaricus	61	40
MA0145.2	Highly_Enriched	Promoter_G4	Poikilotherm	Erpetoichthys_calabaricus	71.2798	48
MA2582.1	Highly_Enriched	Promoter_G4	Poikilotherm	Erpetoichthys_calabaricus	68.0392	51
MA1979.2	Highly_Enriched	Promoter_G4	Poikilotherm	Erpetoichthys_calabaricus	61.6949	59
MA2494.1	Moderately_Reduced	Promoter_G4	Poikilotherm	Erpetoichthys_calabaricus	72.7072	226
MA0736.1	Moderately_Reduced	Promoter_G4	Poikilotherm	Erpetoichthys_calabaricus	78.9905	750
MA1532.2	Highly_Reduced	Promoter_G4	Poikilotherm	Erpetoichthys_calabaricus	67.4185	133
MA1533.2	Highly_Enriched	Promoter_G4	Poikilotherm	Erpetoichthys_calabaricus	70.5263	76
MA2545.1	Highly_Enriched	Promoter_G4	Poikilotherm	Erpetoichthys_calabaricus	65.8898	59
MA0146.3	Moderately_Enriched	Promoter_G4	Poikilotherm	Erpetoichthys_calabaricus	79.5575	113
MA2528.1	Highly_Enriched	Promoter_G4	Poikilotherm	Erpetoichthys_calabaricus	68.9904	78
MA2493.1	Moderately_Enriched	Promoter_G4	Poikilotherm	Erpetoichthys_calabaricus	65.2308	25
MA0685.2	Moderately_Reduced	Promoter_G4	Poikilotherm	Erpetoichthys_calabaricus	96.2905	9660
MA0079.5	Moderately_Reduced	Promoter_G4	Poikilotherm	Erpetoichthys_calabaricus	96.5059	9648
MA1654.2	Moderately_Reduced	Promoter_G4	Poikilotherm	Erpetoichthys_calabaricus	67.6395	93
MA1114.2	Moderately_Enriched	Promoter_G4	Poikilotherm	Erpetoichthys_calabaricus	59.0909	56
MA0814.3	Moderately_Enriched	Promoter_G4	Poikilotherm	Erpetoichthys_calabaricus	85.8092	184
MA0812.2	Moderately_Enriched	Promoter_G4	Poikilotherm	Erpetoichthys_calabaricus	85.6121	295
MA2593.1	Moderately_Enriched	Promoter_G4	Poikilotherm	Erpetoichthys_calabaricus	7.22772	101
MA2534.1	Moderately_Reduced	Promoter_G4	Poikilotherm	Erpetoichthys_calabaricus	63.2867	78
MA0646.2	Highly_Enriched	Promoter_G4	Poikilotherm	Erpetoichthys_calabaricus	68	30
MA1559.2	Moderately_Enriched	Promoter_G4	Poikilotherm	Erpetoichthys_calabaricus	66.6667	50
MA0765.4	Highly_Reduced	Promoter_G4	Poikilotherm	Erpetoichthys_calabaricus	62.4339	42
MA0764.4	Highly_Reduced	Promoter_G4	Poikilotherm	Erpetoichthys_calabaricus	59.4203	46
MA0028.3	Highly_Reduced	Promoter_G4	Poikilotherm	Erpetoichthys_calabaricus	59.2593	45
MA0640.3	Moderately_Enriched	Promoter_G4	Poikilotherm	Erpetoichthys_calabaricus	57.7413	61
MA0519.2	Moderately_Enriched	Promoter_G4	Poikilotherm	Erpetoichthys_calabaricus	51.3228	21
MA2573.1	Highly_Enriched	Promoter_G4	Poikilotherm	Erpetoichthys_calabaricus	75.7488	69
MA2580.1	Moderately_Enriched	Promoter_G4	Poikilotherm	Erpetoichthys_calabaricus	58.8235	17
MA1474.2	Highly_Enriched	Promoter_G4	Poikilotherm	Erpetoichthys_calabaricus	75.2941	34
MA0111.1	Highly_Reduced	Promoter_G4	Poikilotherm	Erpetoichthys_calabaricus	63.5241	81
MA0258.2	Highly_Enriched	Promoter_G4	Poikilotherm	Erpetoichthys_calabaricus	68.9655	58
MA0781.2	Moderately_Reduced	Promoter_G4	Poikilotherm	Erpetoichthys_calabaricus	72.1354	24
MA1513.2	Moderately_Enriched	Promoter_G4	Poikilotherm	Erpetoichthys_calabaricus	97.2521	1301
MA0478.2	Moderately_Enriched	Promoter_G4	Poikilotherm	Erpetoichthys_calabaricus	56.4706	17
MA2602.1	Moderately_Enriched	Promoter_G4	Poikilotherm	Erpetoichthys_calabaricus	85.7919	161
MA2588.1	Highly_Enriched	Promoter_G4	Poikilotherm	Erpetoichthys_calabaricus	88.6628	215
MA1099.3	Moderately_Enriched	Promoter_G4	Poikilotherm	Erpetoichthys_calabaricus	79.3478	46
MA2489.1	Moderately_Enriched	Promoter_G4	Poikilotherm	Erpetoichthys_calabaricus	25.6039	23
MA0632.3	Highly_Enriched	Promoter_G4	Poikilotherm	Erpetoichthys_calabaricus	91.9872	39
MA2524.1	Moderately_Enriched	Promoter_G4	Poikilotherm	Erpetoichthys_calabaricus	61.2245	42
MA0745.3	Highly_Enriched	Promoter_G4	Poikilotherm	Erpetoichthys_calabaricus	68.6441	59
MA1553.2	Moderately_Enriched	Promoter_G4	Poikilotherm	Erpetoichthys_calabaricus	70.2797	22
MA1602.2	Moderately_Reduced	Promoter_G4	Poikilotherm	Erpetoichthys_calabaricus	63.6364	6
MA1998.2	Moderately_Enriched	Promoter_G4	Poikilotherm	Erpetoichthys_calabaricus	56.6176	17
MA1645.2	Highly_Enriched	Promoter_G4	Poikilotherm	Erpetoichthys_calabaricus	58.5526	57
MA0807.1	Moderately_Enriched	Promoter_G4	Poikilotherm	Erpetoichthys_calabaricus	58.8362	58
MA0801.1	Moderately_Enriched	Promoter_G4	Poikilotherm	Erpetoichthys_calabaricus	59.6429	35
MA1580.1	Moderately_Reduced	Promoter_G4	Poikilotherm	Erpetoichthys_calabaricus	36.25	8
MA0469.4	Moderately_Reduced	Promoter_G4	Poikilotherm	Erpetoichthys_calabaricus	53.5714	12
MA2597.1	Highly_Enriched	Promoter_G4	Poikilotherm	Erpetoichthys_calabaricus	44.697	33
MA0136.4	Moderately_Enriched	Promoter_G4	Poikilotherm	Erpetoichthys_calabaricus	48.1707	82
MA1547.2	Moderately_Enriched	Promoter_G4	Poikilotherm	Erpetoichthys_calabaricus	42.378	41
MA1585.2	Moderately_Enriched	Promoter_G4	Poikilotherm	Erpetoichthys_calabaricus	55.5556	21
MA0131.3	Moderately_Enriched	Promoter_G4	Poikilotherm	Erpetoichthys_calabaricus	82.7381	42
MA1125.2	Moderately_Enriched	Promoter_G4	Poikilotherm	Erpetoichthys_calabaricus	1.88953	86
MA0837.3	Moderately_Reduced	Promoter_G4	Poikilotherm	Erpetoichthys_calabaricus	40	6
MA1558.2	Highly_Enriched	Promoter_G4	Poikilotherm	Erpetoichthys_calabaricus	66.9951	58
MA1117.2	Highly_Reduced	Promoter_G4	Poikilotherm	Erpetoichthys_calabaricus	57.1429	105
MA1523.2	Highly_Enriched	Promoter_G4	Poikilotherm	Erpetoichthys_calabaricus	57.1429	35
MA0508.4	Highly_Enriched	Promoter_G4	Poikilotherm	Erpetoichthys_calabaricus	42.8571	45
MA0712.3	Highly_Enriched	Promoter_G4	Poikilotherm	Erpetoichthys_calabaricus	42.8571	40
MA0073.2	Highly_Reduced	Promoter_G4	Poikilotherm	Latimeria_chalumnae	68.3852	9549
MA0163.1	Highly_Reduced	Promoter_G4	Poikilotherm	Latimeria_chalumnae	81.1401	5656
MA2531.1	Moderately_Reduced	Promoter_G4	Poikilotherm	Latimeria_chalumnae	63.6893	1845
MA1987.2	Highly_Reduced	Promoter_G4	Poikilotherm	Latimeria_chalumnae	75.2762	4733
MA1721.2	Moderately_Enriched	Promoter_G4	Poikilotherm	Latimeria_chalumnae	83.9862	806
MA2545.1	Highly_Enriched	Promoter_G4	Poikilotherm	Latimeria_chalumnae	63.8132	257
MA2538.1	Moderately_Enriched	Promoter_G4	Poikilotherm	Latimeria_chalumnae	91.4574	438
MA2553.1	Moderately_Enriched	Promoter_G4	Poikilotherm	Latimeria_chalumnae	78.9624	144
MA2688.1	Highly_Reduced	Promoter_G4	Poikilotherm	Latimeria_chalumnae	73.7875	5593
MA0506.3	Highly_Enriched	Promoter_G4	Poikilotherm	Latimeria_chalumnae	84.8739	119
MA1712.2	Highly_Enriched	Promoter_G4	Poikilotherm	Latimeria_chalumnae	76.2794	646
MA1714.2	Highly_Reduced	Promoter_G4	Poikilotherm	Latimeria_chalumnae	58.7704	583
MA0741.1	Highly_Reduced	Promoter_G4	Poikilotherm	Latimeria_chalumnae	90.6456	17012
MA0747.2	Highly_Reduced	Promoter_G4	Poikilotherm	Latimeria_chalumnae	89.6973	17202
MA0080.7	Highly_Reduced	Promoter_G4	Poikilotherm	Latimeria_chalumnae	61.974	883
MA2528.1	Highly_Enriched	Promoter_G4	Poikilotherm	Latimeria_chalumnae	71.4953	428
MA2494.1	Moderately_Reduced	Promoter_G4	Poikilotherm	Latimeria_chalumnae	69.5621	629
MA0111.1	Highly_Reduced	Promoter_G4	Poikilotherm	Latimeria_chalumnae	64.3877	242
MA0736.1	Moderately_Reduced	Promoter_G4	Poikilotherm	Latimeria_chalumnae	81.5806	2763
MA0472.2	Moderately_Enriched	Promoter_G4	Poikilotherm	Latimeria_chalumnae	78.4376	199
MA0728.1	Highly_Enriched	Promoter_G4	Poikilotherm	Latimeria_chalumnae	56.2887	97
MA2539.1	Moderately_Enriched	Promoter_G4	Poikilotherm	Latimeria_chalumnae	96.8711	799
MA2328.1	Moderately_Enriched	Promoter_G4	Poikilotherm	Latimeria_chalumnae	92.2619	1932
MA0081.3	Highly_Reduced	Promoter_G4	Poikilotherm	Latimeria_chalumnae	63.0345	653
MA0857.1	Moderately_Enriched	Promoter_G4	Poikilotherm	Latimeria_chalumnae	57.655	129
MA2524.1	Moderately_Enriched	Promoter_G4	Poikilotherm	Latimeria_chalumnae	57.6923	78
MA0753.3	Highly_Reduced	Promoter_G4	Poikilotherm	Latimeria_chalumnae	89.763	42832
MA1713.2	Moderately_Enriched	Promoter_G4	Poikilotherm	Latimeria_chalumnae	86.302	649
MA1630.3	Moderately_Reduced	Promoter_G4	Poikilotherm	Latimeria_chalumnae	89.4601	24263
MA1653.2	Moderately_Reduced	Promoter_G4	Poikilotherm	Latimeria_chalumnae	91.5624	19246
MA1564.2	Highly_Reduced	Promoter_G4	Poikilotherm	Latimeria_chalumnae	94.8391	16813
MA1654.2	Moderately_Reduced	Promoter_G4	Poikilotherm	Latimeria_chalumnae	69.5281	441
MA0146.3	Moderately_Enriched	Promoter_G4	Poikilotherm	Latimeria_chalumnae	80.2273	264
MA1516.2	Moderately_Enriched	Promoter_G4	Poikilotherm	Latimeria_chalumnae	86.8892	794
MA1532.2	Highly_Reduced	Promoter_G4	Poikilotherm	Latimeria_chalumnae	68.4975	335
MA1553.2	Moderately_Enriched	Promoter_G4	Poikilotherm	Latimeria_chalumnae	66.6154	50
MA2534.1	Moderately_Reduced	Promoter_G4	Poikilotherm	Latimeria_chalumnae	69.1979	255
MA0258.2	Highly_Enriched	Promoter_G4	Poikilotherm	Latimeria_chalumnae	70.7438	242
MA1533.2	Highly_Enriched	Promoter_G4	Poikilotherm	Latimeria_chalumnae	69.5726	78
MA0526.5	Moderately_Reduced	Promoter_G4	Poikilotherm	Latimeria_chalumnae	65.7576	66
MA0620.4	Moderately_Reduced	Promoter_G4	Poikilotherm	Latimeria_chalumnae	59.7436	78
MA2340.1	Moderately_Enriched	Promoter_G4	Poikilotherm	Latimeria_chalumnae	68.1818	121
MA0831.3	Moderately_Reduced	Promoter_G4	Poikilotherm	Latimeria_chalumnae	64.0541	74
MA1531.2	Moderately_Reduced	Promoter_G4	Poikilotherm	Latimeria_chalumnae	72.0077	333
MA2519.1	Highly_Reduced	Promoter_G4	Poikilotherm	Latimeria_chalumnae	66.927	311
MA2582.1	Highly_Enriched	Promoter_G4	Poikilotherm	Latimeria_chalumnae	61.4433	291
MA1114.2	Moderately_Enriched	Promoter_G4	Poikilotherm	Latimeria_chalumnae	60.9946	117
MA2493.1	Moderately_Enriched	Promoter_G4	Poikilotherm	Latimeria_chalumnae	67.6208	129
MA1580.1	Moderately_Reduced	Promoter_G4	Poikilotherm	Latimeria_chalumnae	38.5714	28
MA0685.2	Moderately_Reduced	Promoter_G4	Poikilotherm	Latimeria_chalumnae	96.0423	22401
MA0079.5	Moderately_Reduced	Promoter_G4	Poikilotherm	Latimeria_chalumnae	95.9686	22628
MA1979.2	Highly_Enriched	Promoter_G4	Poikilotherm	Latimeria_chalumnae	70.9901	303
MA0478.2	Moderately_Enriched	Promoter_G4	Poikilotherm	Latimeria_chalumnae	59.7753	178
MA2573.1	Highly_Enriched	Promoter_G4	Poikilotherm	Latimeria_chalumnae	72.7132	129
MA0814.3	Moderately_Enriched	Promoter_G4	Poikilotherm	Latimeria_chalumnae	85.765	626
MA0812.2	Moderately_Enriched	Promoter_G4	Poikilotherm	Latimeria_chalumnae	89.3183	621
MA0821.2	Moderately_Enriched	Promoter_G4	Poikilotherm	Latimeria_chalumnae	78	70
MA2593.1	Moderately_Enriched	Promoter_G4	Poikilotherm	Latimeria_chalumnae	7.57547	1060
MA0145.2	Highly_Enriched	Promoter_G4	Poikilotherm	Latimeria_chalumnae	68.7579	337
MA2580.1	Moderately_Enriched	Promoter_G4	Poikilotherm	Latimeria_chalumnae	57.1186	59
MA1602.2	Moderately_Reduced	Promoter_G4	Poikilotherm	Latimeria_chalumnae	54.5455	11
MA0729.1	Highly_Enriched	Promoter_G4	Poikilotherm	Latimeria_chalumnae	57.964	173
MA1474.2	Highly_Enriched	Promoter_G4	Poikilotherm	Latimeria_chalumnae	73.5484	62
MA2489.1	Moderately_Enriched	Promoter_G4	Poikilotherm	Latimeria_chalumnae	23.9945	163
MA1559.2	Moderately_Enriched	Promoter_G4	Poikilotherm	Latimeria_chalumnae	66.3194	96
MA0765.4	Highly_Reduced	Promoter_G4	Poikilotherm	Latimeria_chalumnae	63.9918	54
MA0764.4	Highly_Reduced	Promoter_G4	Poikilotherm	Latimeria_chalumnae	64.8148	54
MA0028.3	Highly_Reduced	Promoter_G4	Poikilotherm	Latimeria_chalumnae	64.4444	50
MA0640.3	Moderately_Enriched	Promoter_G4	Poikilotherm	Latimeria_chalumnae	57.3099	190
MA0519.2	Moderately_Enriched	Promoter_G4	Poikilotherm	Latimeria_chalumnae	53.0303	44
MA1585.2	Moderately_Enriched	Promoter_G4	Poikilotherm	Latimeria_chalumnae	60.7843	102
MA1513.2	Moderately_Enriched	Promoter_G4	Poikilotherm	Latimeria_chalumnae	97.4055	1773
MA1528.2	Highly_Enriched	Promoter_G4	Poikilotherm	Latimeria_chalumnae	71.7647	170
MA2602.1	Moderately_Enriched	Promoter_G4	Poikilotherm	Latimeria_chalumnae	86.0746	342
MA2588.1	Highly_Enriched	Promoter_G4	Poikilotherm	Latimeria_chalumnae	89.1871	326
MA1099.3	Moderately_Enriched	Promoter_G4	Poikilotherm	Latimeria_chalumnae	79.0094	106
MA0646.2	Highly_Enriched	Promoter_G4	Poikilotherm	Latimeria_chalumnae	69.6429	56
MA0632.3	Highly_Enriched	Promoter_G4	Poikilotherm	Latimeria_chalumnae	92.3544	103
MA0745.3	Highly_Enriched	Promoter_G4	Poikilotherm	Latimeria_chalumnae	69.6591	110
MA0781.2	Moderately_Reduced	Promoter_G4	Poikilotherm	Latimeria_chalumnae	65.1786	14
MA1998.2	Moderately_Enriched	Promoter_G4	Poikilotherm	Latimeria_chalumnae	55.8036	28
MA1645.2	Highly_Enriched	Promoter_G4	Poikilotherm	Latimeria_chalumnae	59.6154	156
MA0807.1	Moderately_Enriched	Promoter_G4	Poikilotherm	Latimeria_chalumnae	57.1691	68
MA0801.1	Moderately_Enriched	Promoter_G4	Poikilotherm	Latimeria_chalumnae	54.8469	49
MA2597.1	Highly_Enriched	Promoter_G4	Poikilotherm	Latimeria_chalumnae	48.6538	65
MA0136.4	Moderately_Enriched	Promoter_G4	Poikilotherm	Latimeria_chalumnae	47.7083	120
MA1547.2	Moderately_Enriched	Promoter_G4	Poikilotherm	Latimeria_chalumnae	41.723	74
MA0131.3	Moderately_Enriched	Promoter_G4	Poikilotherm	Latimeria_chalumnae	82.9114	79
MA1125.2	Moderately_Enriched	Promoter_G4	Poikilotherm	Latimeria_chalumnae	2.56264	1317
MA0837.3	Moderately_Reduced	Promoter_G4	Poikilotherm	Latimeria_chalumnae	50	11
MA1558.2	Highly_Enriched	Promoter_G4	Poikilotherm	Latimeria_chalumnae	66.6667	126
MA1117.2	Highly_Reduced	Promoter_G4	Poikilotherm	Latimeria_chalumnae	57.1429	805
MA1523.2	Highly_Enriched	Promoter_G4	Poikilotherm	Latimeria_chalumnae	57.1429	76
MA0469.4	Moderately_Reduced	Promoter_G4	Poikilotherm	Latimeria_chalumnae	57.1429	12
MA0508.4	Highly_Enriched	Promoter_G4	Poikilotherm	Latimeria_chalumnae	42.8571	168
MA0712.3	Highly_Enriched	Promoter_G4	Poikilotherm	Latimeria_chalumnae	42.8571	68
MA1712.2	Highly_Enriched	Promoter_G4	Poikilotherm	Chelonoidis_abingdonii	82.7532	7862
MA0073.2	Highly_Reduced	Promoter_G4	Poikilotherm	Chelonoidis_abingdonii	73.6497	18762
MA1721.2	Moderately_Enriched	Promoter_G4	Poikilotherm	Chelonoidis_abingdonii	84.5827	6426
MA2528.1	Highly_Enriched	Promoter_G4	Poikilotherm	Chelonoidis_abingdonii	72.8423	1738
MA0163.1	Highly_Reduced	Promoter_G4	Poikilotherm	Chelonoidis_abingdonii	80.4617	22604
MA2553.1	Moderately_Enriched	Promoter_G4	Poikilotherm	Chelonoidis_abingdonii	81.1437	1508
MA2531.1	Moderately_Reduced	Promoter_G4	Poikilotherm	Chelonoidis_abingdonii	66.9105	4073
MA1654.2	Moderately_Reduced	Promoter_G4	Poikilotherm	Chelonoidis_abingdonii	71.2272	2081
MA2494.1	Moderately_Reduced	Promoter_G4	Poikilotherm	Chelonoidis_abingdonii	74.1421	3457
MA2519.1	Highly_Reduced	Promoter_G4	Poikilotherm	Chelonoidis_abingdonii	71.242	1378
MA1987.2	Highly_Reduced	Promoter_G4	Poikilotherm	Chelonoidis_abingdonii	76.6651	14035
MA2538.1	Moderately_Enriched	Promoter_G4	Poikilotherm	Chelonoidis_abingdonii	91.596	3539
MA2688.1	Highly_Reduced	Promoter_G4	Poikilotherm	Chelonoidis_abingdonii	73.7484	13668
MA0506.3	Highly_Enriched	Promoter_G4	Poikilotherm	Chelonoidis_abingdonii	85.0851	1841
MA0258.2	Highly_Enriched	Promoter_G4	Poikilotherm	Chelonoidis_abingdonii	72.6348	1317
MA0145.2	Highly_Enriched	Promoter_G4	Poikilotherm	Chelonoidis_abingdonii	77.0183	1858
MA0736.1	Moderately_Reduced	Promoter_G4	Poikilotherm	Chelonoidis_abingdonii	81.035	7260
MA1714.2	Highly_Reduced	Promoter_G4	Poikilotherm	Chelonoidis_abingdonii	64.5309	920
MA2545.1	Highly_Enriched	Promoter_G4	Poikilotherm	Chelonoidis_abingdonii	67.3307	822
MA0741.1	Highly_Reduced	Promoter_G4	Poikilotherm	Chelonoidis_abingdonii	87.2434	29108
MA1528.2	Highly_Enriched	Promoter_G4	Poikilotherm	Chelonoidis_abingdonii	77.777	1987
MA0747.2	Highly_Reduced	Promoter_G4	Poikilotherm	Chelonoidis_abingdonii	86.0913	25887
MA1531.2	Moderately_Reduced	Promoter_G4	Poikilotherm	Chelonoidis_abingdonii	72.4992	2295
MA0729.1	Highly_Enriched	Promoter_G4	Poikilotherm	Chelonoidis_abingdonii	63.5836	364
MA1553.2	Moderately_Enriched	Promoter_G4	Poikilotherm	Chelonoidis_abingdonii	70.0734	283
MA2534.1	Moderately_Reduced	Promoter_G4	Poikilotherm	Chelonoidis_abingdonii	70.2245	1482
MA2573.1	Highly_Enriched	Promoter_G4	Poikilotherm	Chelonoidis_abingdonii	79.7584	1076
MA0080.7	Highly_Reduced	Promoter_G4	Poikilotherm	Chelonoidis_abingdonii	63.4878	2048
MA0081.3	Highly_Reduced	Promoter_G4	Poikilotherm	Chelonoidis_abingdonii	64.1319	1747
MA1114.2	Moderately_Enriched	Promoter_G4	Poikilotherm	Chelonoidis_abingdonii	63.7727	800
MA1532.2	Highly_Reduced	Promoter_G4	Poikilotherm	Chelonoidis_abingdonii	69.9438	1542
MA0472.2	Moderately_Enriched	Promoter_G4	Poikilotherm	Chelonoidis_abingdonii	84.1199	1722
MA2539.1	Moderately_Enriched	Promoter_G4	Poikilotherm	Chelonoidis_abingdonii	97.0491	8194
MA2328.1	Moderately_Enriched	Promoter_G4	Poikilotherm	Chelonoidis_abingdonii	92.6181	13399
MA2493.1	Moderately_Enriched	Promoter_G4	Poikilotherm	Chelonoidis_abingdonii	70.688	644
MA0753.3	Highly_Reduced	Promoter_G4	Poikilotherm	Chelonoidis_abingdonii	88.4076	59459
MA1713.2	Moderately_Enriched	Promoter_G4	Poikilotherm	Chelonoidis_abingdonii	86.669	5614
MA1630.3	Moderately_Reduced	Promoter_G4	Poikilotherm	Chelonoidis_abingdonii	85.8271	57859
MA1653.2	Moderately_Reduced	Promoter_G4	Poikilotherm	Chelonoidis_abingdonii	86.97	43716
MA1564.2	Highly_Reduced	Promoter_G4	Poikilotherm	Chelonoidis_abingdonii	90.5683	24688
MA0728.1	Highly_Enriched	Promoter_G4	Poikilotherm	Chelonoidis_abingdonii	61.0317	504
MA0146.3	Moderately_Enriched	Promoter_G4	Poikilotherm	Chelonoidis_abingdonii	81.104	2038
MA1516.2	Moderately_Enriched	Promoter_G4	Poikilotherm	Chelonoidis_abingdonii	88.1394	5697
MA0821.2	Moderately_Enriched	Promoter_G4	Poikilotherm	Chelonoidis_abingdonii	80.9167	720
MA2524.1	Moderately_Enriched	Promoter_G4	Poikilotherm	Chelonoidis_abingdonii	64.5549	345
MA1474.2	Highly_Enriched	Promoter_G4	Poikilotherm	Chelonoidis_abingdonii	77.2956	318
MA0526.5	Moderately_Reduced	Promoter_G4	Poikilotherm	Chelonoidis_abingdonii	66.0967	269
MA0620.4	Moderately_Reduced	Promoter_G4	Poikilotherm	Chelonoidis_abingdonii	60.1695	236
MA2340.1	Moderately_Enriched	Promoter_G4	Poikilotherm	Chelonoidis_abingdonii	70.062	645
MA0831.3	Moderately_Reduced	Promoter_G4	Poikilotherm	Chelonoidis_abingdonii	62.9856	278
MA2582.1	Highly_Enriched	Promoter_G4	Poikilotherm	Chelonoidis_abingdonii	64.8285	379
MA2580.1	Moderately_Enriched	Promoter_G4	Poikilotherm	Chelonoidis_abingdonii	57.1967	239
MA1979.2	Highly_Enriched	Promoter_G4	Poikilotherm	Chelonoidis_abingdonii	67.4917	909
MA0111.1	Highly_Reduced	Promoter_G4	Poikilotherm	Chelonoidis_abingdonii	67.3429	1295
MA1602.2	Moderately_Reduced	Promoter_G4	Poikilotherm	Chelonoidis_abingdonii	60.107	85
MA0857.1	Moderately_Enriched	Promoter_G4	Poikilotherm	Chelonoidis_abingdonii	62.8192	372
MA0646.2	Highly_Enriched	Promoter_G4	Poikilotherm	Chelonoidis_abingdonii	73.3911	693
MA0781.2	Moderately_Reduced	Promoter_G4	Poikilotherm	Chelonoidis_abingdonii	73.9046	194
MA0685.2	Moderately_Reduced	Promoter_G4	Poikilotherm	Chelonoidis_abingdonii	91.7272	37671
MA0079.5	Moderately_Reduced	Promoter_G4	Poikilotherm	Chelonoidis_abingdonii	91.6103	40376
MA0478.2	Moderately_Enriched	Promoter_G4	Poikilotherm	Chelonoidis_abingdonii	60.0901	222
MA1533.2	Highly_Enriched	Promoter_G4	Poikilotherm	Chelonoidis_abingdonii	74.7762	767
MA2489.1	Moderately_Enriched	Promoter_G4	Poikilotherm	Chelonoidis_abingdonii	39.0212	42
MA0814.3	Moderately_Enriched	Promoter_G4	Poikilotherm	Chelonoidis_abingdonii	86.3647	3680
MA0812.2	Moderately_Enriched	Promoter_G4	Poikilotherm	Chelonoidis_abingdonii	89.4918	4386
MA2593.1	Moderately_Enriched	Promoter_G4	Poikilotherm	Chelonoidis_abingdonii	10.3738	107
MA1580.1	Moderately_Reduced	Promoter_G4	Poikilotherm	Chelonoidis_abingdonii	45.4839	31
MA1559.2	Moderately_Enriched	Promoter_G4	Poikilotherm	Chelonoidis_abingdonii	69.027	885
MA0765.4	Highly_Reduced	Promoter_G4	Poikilotherm	Chelonoidis_abingdonii	66.2887	294
MA0764.4	Highly_Reduced	Promoter_G4	Poikilotherm	Chelonoidis_abingdonii	66.0876	307
MA0028.3	Highly_Reduced	Promoter_G4	Poikilotherm	Chelonoidis_abingdonii	65.8593	289
MA0640.3	Moderately_Enriched	Promoter_G4	Poikilotherm	Chelonoidis_abingdonii	60.1916	870
MA0519.2	Moderately_Enriched	Promoter_G4	Poikilotherm	Chelonoidis_abingdonii	53.0688	210
MA1585.2	Moderately_Enriched	Promoter_G4	Poikilotherm	Chelonoidis_abingdonii	57.5163	204
MA0469.4	Moderately_Reduced	Promoter_G4	Poikilotherm	Chelonoidis_abingdonii	53.0612	28
MA1513.2	Moderately_Enriched	Promoter_G4	Poikilotherm	Chelonoidis_abingdonii	97.8432	13944
MA0837.3	Moderately_Reduced	Promoter_G4	Poikilotherm	Chelonoidis_abingdonii	48.8235	17
MA2602.1	Moderately_Enriched	Promoter_G4	Poikilotherm	Chelonoidis_abingdonii	86.4319	2247
MA2588.1	Highly_Enriched	Promoter_G4	Poikilotherm	Chelonoidis_abingdonii	90.7123	2720
MA1099.3	Moderately_Enriched	Promoter_G4	Poikilotherm	Chelonoidis_abingdonii	85.5505	654
MA0632.3	Highly_Enriched	Promoter_G4	Poikilotherm	Chelonoidis_abingdonii	92.3387	806
MA0131.3	Moderately_Enriched	Promoter_G4	Poikilotherm	Chelonoidis_abingdonii	84.5798	595
MA0745.3	Highly_Enriched	Promoter_G4	Poikilotherm	Chelonoidis_abingdonii	70.7311	1019
MA1998.2	Moderately_Enriched	Promoter_G4	Poikilotherm	Chelonoidis_abingdonii	57.1498	257
MA1645.2	Highly_Enriched	Promoter_G4	Poikilotherm	Chelonoidis_abingdonii	60.8761	662
MA0807.1	Moderately_Enriched	Promoter_G4	Poikilotherm	Chelonoidis_abingdonii	59.1582	591
MA0801.1	Moderately_Enriched	Promoter_G4	Poikilotherm	Chelonoidis_abingdonii	58.2918	401
MA2597.1	Highly_Enriched	Promoter_G4	Poikilotherm	Chelonoidis_abingdonii	46.2025	158
MA0136.4	Moderately_Enriched	Promoter_G4	Poikilotherm	Chelonoidis_abingdonii	48.5526	380
MA1547.2	Moderately_Enriched	Promoter_G4	Poikilotherm	Chelonoidis_abingdonii	41.973	204
MA1125.2	Moderately_Enriched	Promoter_G4	Poikilotherm	Chelonoidis_abingdonii	4.31034	116
MA2102.1	Moderately_Reduced	Promoter_G4	Poikilotherm	Chelonoidis_abingdonii	37.5	18
MA1558.2	Highly_Enriched	Promoter_G4	Poikilotherm	Chelonoidis_abingdonii	68.244	960
MA1117.2	Highly_Reduced	Promoter_G4	Poikilotherm	Chelonoidis_abingdonii	57.1429	1027
MA1523.2	Highly_Enriched	Promoter_G4	Poikilotherm	Chelonoidis_abingdonii	57.1429	391
MA0508.4	Highly_Enriched	Promoter_G4	Poikilotherm	Chelonoidis_abingdonii	42.8571	315
MA0712.3	Highly_Enriched	Promoter_G4	Poikilotherm	Chelonoidis_abingdonii	42.8571	172
MA0073.2	Highly_Reduced	Promoter_G4	Poikilotherm	Laticauda_laticaudata	77.7943	10690
MA2553.1	Moderately_Enriched	Promoter_G4	Poikilotherm	Laticauda_laticaudata	82.6298	786
MA2688.1	Highly_Reduced	Promoter_G4	Poikilotherm	Laticauda_laticaudata	76.004	11765
MA1712.2	Highly_Enriched	Promoter_G4	Poikilotherm	Laticauda_laticaudata	84.5262	1846
MA2494.1	Moderately_Reduced	Promoter_G4	Poikilotherm	Laticauda_laticaudata	73.7425	1379
MA1721.2	Moderately_Enriched	Promoter_G4	Poikilotherm	Laticauda_laticaudata	89.373	3233
MA0163.1	Highly_Reduced	Promoter_G4	Poikilotherm	Laticauda_laticaudata	86.7067	11336
MA2531.1	Moderately_Reduced	Promoter_G4	Poikilotherm	Laticauda_laticaudata	65.5562	3302
MA2519.1	Highly_Reduced	Promoter_G4	Poikilotherm	Laticauda_laticaudata	71.3815	758
MA1531.2	Moderately_Reduced	Promoter_G4	Poikilotherm	Laticauda_laticaudata	72.3497	411
MA1528.2	Highly_Enriched	Promoter_G4	Poikilotherm	Laticauda_laticaudata	78.415	411
MA2538.1	Moderately_Enriched	Promoter_G4	Poikilotherm	Laticauda_laticaudata	92.9611	2897
MA1987.2	Highly_Reduced	Promoter_G4	Poikilotherm	Laticauda_laticaudata	78.7964	10878
MA0081.3	Highly_Reduced	Promoter_G4	Poikilotherm	Laticauda_laticaudata	63.1454	1235
MA0506.3	Highly_Enriched	Promoter_G4	Poikilotherm	Laticauda_laticaudata	86.9066	660
MA2528.1	Highly_Enriched	Promoter_G4	Poikilotherm	Laticauda_laticaudata	73.8613	247
MA0145.2	Highly_Enriched	Promoter_G4	Poikilotherm	Laticauda_laticaudata	77.884	426
MA1714.2	Highly_Reduced	Promoter_G4	Poikilotherm	Laticauda_laticaudata	63.8551	536
MA0080.7	Highly_Reduced	Promoter_G4	Poikilotherm	Laticauda_laticaudata	63.1052	2175
MA0736.1	Moderately_Reduced	Promoter_G4	Poikilotherm	Laticauda_laticaudata	84.3235	2912
MA1654.2	Moderately_Reduced	Promoter_G4	Poikilotherm	Laticauda_laticaudata	70.4177	537
MA0258.2	Highly_Enriched	Promoter_G4	Poikilotherm	Laticauda_laticaudata	72.8552	251
MA0741.1	Highly_Reduced	Promoter_G4	Poikilotherm	Laticauda_laticaudata	91.8846	23252
MA0747.2	Highly_Reduced	Promoter_G4	Poikilotherm	Laticauda_laticaudata	91.3046	23285
MA0728.1	Highly_Enriched	Promoter_G4	Poikilotherm	Laticauda_laticaudata	60.8791	91
MA2545.1	Highly_Enriched	Promoter_G4	Poikilotherm	Laticauda_laticaudata	66.7718	317
MA2534.1	Moderately_Reduced	Promoter_G4	Poikilotherm	Laticauda_laticaudata	68.4971	447
MA1532.2	Highly_Reduced	Promoter_G4	Poikilotherm	Laticauda_laticaudata	67.6904	267
MA0857.1	Moderately_Enriched	Promoter_G4	Poikilotherm	Laticauda_laticaudata	60.8083	133
MA2539.1	Moderately_Enriched	Promoter_G4	Poikilotherm	Laticauda_laticaudata	97.5632	4711
MA2328.1	Moderately_Enriched	Promoter_G4	Poikilotherm	Laticauda_laticaudata	93.6305	6630
MA0753.3	Highly_Reduced	Promoter_G4	Poikilotherm	Laticauda_laticaudata	91.0896	52459
MA1713.2	Moderately_Enriched	Promoter_G4	Poikilotherm	Laticauda_laticaudata	88.6168	2581
MA1630.3	Moderately_Reduced	Promoter_G4	Poikilotherm	Laticauda_laticaudata	89.3418	37679
MA1653.2	Moderately_Reduced	Promoter_G4	Poikilotherm	Laticauda_laticaudata	90.7057	32831
MA1564.2	Highly_Reduced	Promoter_G4	Poikilotherm	Laticauda_laticaudata	94.7291	24252
MA0729.1	Highly_Enriched	Promoter_G4	Poikilotherm	Laticauda_laticaudata	64.0301	118
MA0472.2	Moderately_Enriched	Promoter_G4	Poikilotherm	Laticauda_laticaudata	86.7451	834
MA0146.3	Moderately_Enriched	Promoter_G4	Poikilotherm	Laticauda_laticaudata	81.2461	642
MA1516.2	Moderately_Enriched	Promoter_G4	Poikilotherm	Laticauda_laticaudata	90.1335	2173
MA0821.2	Moderately_Enriched	Promoter_G4	Poikilotherm	Laticauda_laticaudata	84.6491	228
MA2489.1	Moderately_Enriched	Promoter_G4	Poikilotherm	Laticauda_laticaudata	26.4427	129
MA2573.1	Highly_Enriched	Promoter_G4	Poikilotherm	Laticauda_laticaudata	81.9251	374
MA2340.1	Moderately_Enriched	Promoter_G4	Poikilotherm	Laticauda_laticaudata	72.13	277
MA2524.1	Moderately_Enriched	Promoter_G4	Poikilotherm	Laticauda_laticaudata	62.5929	173
MA0111.1	Highly_Reduced	Promoter_G4	Poikilotherm	Laticauda_laticaudata	66.1858	271
MA1553.2	Moderately_Enriched	Promoter_G4	Poikilotherm	Laticauda_laticaudata	69.0078	69
MA0685.2	Moderately_Reduced	Promoter_G4	Poikilotherm	Laticauda_laticaudata	95.2978	32824
MA0079.5	Moderately_Reduced	Promoter_G4	Poikilotherm	Laticauda_laticaudata	94.9936	33963
MA1114.2	Moderately_Enriched	Promoter_G4	Poikilotherm	Laticauda_laticaudata	64.0663	148
MA1979.2	Highly_Enriched	Promoter_G4	Poikilotherm	Laticauda_laticaudata	67.7717	184
MA0478.2	Moderately_Enriched	Promoter_G4	Poikilotherm	Laticauda_laticaudata	59.6154	26
MA0814.3	Moderately_Enriched	Promoter_G4	Poikilotherm	Laticauda_laticaudata	86.5497	1045
MA0812.2	Moderately_Enriched	Promoter_G4	Poikilotherm	Laticauda_laticaudata	89.8116	1168
MA0469.4	Moderately_Reduced	Promoter_G4	Poikilotherm	Laticauda_laticaudata	51.2605	17
MA2582.1	Highly_Enriched	Promoter_G4	Poikilotherm	Laticauda_laticaudata	64.3548	124
MA2593.1	Moderately_Enriched	Promoter_G4	Poikilotherm	Laticauda_laticaudata	8.18182	594
MA0526.5	Moderately_Reduced	Promoter_G4	Poikilotherm	Laticauda_laticaudata	67.0455	88
MA0620.4	Moderately_Reduced	Promoter_G4	Poikilotherm	Laticauda_laticaudata	60.4878	82
MA0831.3	Moderately_Reduced	Promoter_G4	Poikilotherm	Laticauda_laticaudata	62.619	84
MA1474.2	Highly_Enriched	Promoter_G4	Poikilotherm	Laticauda_laticaudata	81.0563	142
MA1533.2	Highly_Enriched	Promoter_G4	Poikilotherm	Laticauda_laticaudata	80.4878	205
MA0765.4	Highly_Reduced	Promoter_G4	Poikilotherm	Laticauda_laticaudata	69.0535	135
MA0764.4	Highly_Reduced	Promoter_G4	Poikilotherm	Laticauda_laticaudata	69.6353	131
MA0028.3	Highly_Reduced	Promoter_G4	Poikilotherm	Laticauda_laticaudata	69.296	131
MA0640.3	Moderately_Enriched	Promoter_G4	Poikilotherm	Laticauda_laticaudata	57.6857	386
MA2493.1	Moderately_Enriched	Promoter_G4	Poikilotherm	Laticauda_laticaudata	69.3117	95
MA0519.2	Moderately_Enriched	Promoter_G4	Poikilotherm	Laticauda_laticaudata	51.4957	104
MA0781.2	Moderately_Reduced	Promoter_G4	Poikilotherm	Laticauda_laticaudata	75	94
MA0646.2	Highly_Enriched	Promoter_G4	Poikilotherm	Laticauda_laticaudata	74.8649	111
MA1559.2	Moderately_Enriched	Promoter_G4	Poikilotherm	Laticauda_laticaudata	70.8471	202
MA1513.2	Moderately_Enriched	Promoter_G4	Poikilotherm	Laticauda_laticaudata	98.0198	7575
MA2580.1	Moderately_Enriched	Promoter_G4	Poikilotherm	Laticauda_laticaudata	56.6667	48
MA0837.3	Moderately_Reduced	Promoter_G4	Poikilotherm	Laticauda_laticaudata	48.3333	12
MA2602.1	Moderately_Enriched	Promoter_G4	Poikilotherm	Laticauda_laticaudata	88.1203	806
MA2588.1	Highly_Enriched	Promoter_G4	Poikilotherm	Laticauda_laticaudata	91.4919	1049
MA1099.3	Moderately_Enriched	Promoter_G4	Poikilotherm	Laticauda_laticaudata	89.9642	279
MA0632.3	Highly_Enriched	Promoter_G4	Poikilotherm	Laticauda_laticaudata	93.7128	336
MA0131.3	Moderately_Enriched	Promoter_G4	Poikilotherm	Laticauda_laticaudata	85.1032	339
MA1580.1	Moderately_Reduced	Promoter_G4	Poikilotherm	Laticauda_laticaudata	42.5	4
MA0745.3	Highly_Enriched	Promoter_G4	Poikilotherm	Laticauda_laticaudata	70.5275	218
MA1602.2	Moderately_Reduced	Promoter_G4	Poikilotherm	Laticauda_laticaudata	64.3357	13
MA1998.2	Moderately_Enriched	Promoter_G4	Poikilotherm	Laticauda_laticaudata	54.4872	39
MA1645.2	Highly_Enriched	Promoter_G4	Poikilotherm	Laticauda_laticaudata	60.5	200
MA0807.1	Moderately_Enriched	Promoter_G4	Poikilotherm	Laticauda_laticaudata	58.4158	101
MA0801.1	Moderately_Enriched	Promoter_G4	Poikilotherm	Laticauda_laticaudata	57.377	61
MA2597.1	Highly_Enriched	Promoter_G4	Poikilotherm	Laticauda_laticaudata	45.9906	53
MA0136.4	Moderately_Enriched	Promoter_G4	Poikilotherm	Laticauda_laticaudata	48.0686	576
MA1547.2	Moderately_Enriched	Promoter_G4	Poikilotherm	Laticauda_laticaudata	41.8269	52
MA1585.2	Moderately_Enriched	Promoter_G4	Poikilotherm	Laticauda_laticaudata	57.0048	23
MA1125.2	Moderately_Enriched	Promoter_G4	Poikilotherm	Laticauda_laticaudata	1.78571	602
MA2102.1	Moderately_Reduced	Promoter_G4	Poikilotherm	Laticauda_laticaudata	37.5	16
MA1558.2	Highly_Enriched	Promoter_G4	Poikilotherm	Laticauda_laticaudata	68.018	222
MA1117.2	Highly_Reduced	Promoter_G4	Poikilotherm	Laticauda_laticaudata	57.1429	459
MA1523.2	Highly_Enriched	Promoter_G4	Poikilotherm	Laticauda_laticaudata	57.1429	103
MA0508.4	Highly_Enriched	Promoter_G4	Poikilotherm	Laticauda_laticaudata	42.8571	357
MA0712.3	Highly_Enriched	Promoter_G4	Poikilotherm	Laticauda_laticaudata	42.8571	54
MA0073.2	Highly_Reduced	Promoter_G4	Poikilotherm	Terrapene_carolina_triunguis	79.0074	32413
MA2494.1	Moderately_Reduced	Promoter_G4	Poikilotherm	Terrapene_carolina_triunguis	76.1278	4490
MA1712.2	Highly_Enriched	Promoter_G4	Poikilotherm	Terrapene_carolina_triunguis	84.3091	11349
MA2688.1	Highly_Reduced	Promoter_G4	Poikilotherm	Terrapene_carolina_triunguis	79.3745	23501
MA1721.2	Moderately_Enriched	Promoter_G4	Poikilotherm	Terrapene_carolina_triunguis	85.6286	9755
MA0163.1	Highly_Reduced	Promoter_G4	Poikilotherm	Terrapene_carolina_triunguis	84.4292	37269
MA2528.1	Highly_Enriched	Promoter_G4	Poikilotherm	Terrapene_carolina_triunguis	74.271	2332
MA2553.1	Moderately_Enriched	Promoter_G4	Poikilotherm	Terrapene_carolina_triunguis	83.1682	2381
MA0258.2	Highly_Enriched	Promoter_G4	Poikilotherm	Terrapene_carolina_triunguis	73.9307	1596
MA1987.2	Highly_Reduced	Promoter_G4	Poikilotherm	Terrapene_carolina_triunguis	81.8017	25046
MA2531.1	Moderately_Reduced	Promoter_G4	Poikilotherm	Terrapene_carolina_triunguis	67.712	5440
MA2519.1	Highly_Reduced	Promoter_G4	Poikilotherm	Terrapene_carolina_triunguis	72.7247	1747
MA2538.1	Moderately_Enriched	Promoter_G4	Poikilotherm	Terrapene_carolina_triunguis	91.7797	5974
MA0736.1	Moderately_Reduced	Promoter_G4	Poikilotherm	Terrapene_carolina_triunguis	82.9662	10285
MA0506.3	Highly_Enriched	Promoter_G4	Poikilotherm	Terrapene_carolina_triunguis	85.6948	2442
MA1654.2	Moderately_Reduced	Promoter_G4	Poikilotherm	Terrapene_carolina_triunguis	72.7499	2566
MA2545.1	Highly_Enriched	Promoter_G4	Poikilotherm	Terrapene_carolina_triunguis	67.753	932
MA1531.2	Moderately_Reduced	Promoter_G4	Poikilotherm	Terrapene_carolina_triunguis	72.993	2607
MA0741.1	Highly_Reduced	Promoter_G4	Poikilotherm	Terrapene_carolina_triunguis	90.5091	54023
MA0145.2	Highly_Enriched	Promoter_G4	Poikilotherm	Terrapene_carolina_triunguis	78.5684	2324
MA1532.2	Highly_Reduced	Promoter_G4	Poikilotherm	Terrapene_carolina_triunguis	69.716	1655
MA0747.2	Highly_Reduced	Promoter_G4	Poikilotherm	Terrapene_carolina_triunguis	89.6834	49634
MA0080.7	Highly_Reduced	Promoter_G4	Poikilotherm	Terrapene_carolina_triunguis	63.8296	2555
MA2534.1	Moderately_Reduced	Promoter_G4	Poikilotherm	Terrapene_carolina_triunguis	71.0641	1771
MA1714.2	Highly_Reduced	Promoter_G4	Poikilotherm	Terrapene_carolina_triunguis	65.4328	1247
MA0081.3	Highly_Reduced	Promoter_G4	Poikilotherm	Terrapene_carolina_triunguis	64.4669	2238
MA1114.2	Moderately_Enriched	Promoter_G4	Poikilotherm	Terrapene_carolina_triunguis	63.6606	750
MA0472.2	Moderately_Enriched	Promoter_G4	Poikilotherm	Terrapene_carolina_triunguis	85.1558	2386
MA1528.2	Highly_Enriched	Promoter_G4	Poikilotherm	Terrapene_carolina_triunguis	79.7346	2616
MA0781.2	Moderately_Reduced	Promoter_G4	Poikilotherm	Terrapene_carolina_triunguis	75.7609	230
MA2524.1	Moderately_Enriched	Promoter_G4	Poikilotherm	Terrapene_carolina_triunguis	66.892	465
MA2539.1	Moderately_Enriched	Promoter_G4	Poikilotherm	Terrapene_carolina_triunguis	97.1789	13718
MA2328.1	Moderately_Enriched	Promoter_G4	Poikilotherm	Terrapene_carolina_triunguis	93.1577	22019
MA2493.1	Moderately_Enriched	Promoter_G4	Poikilotherm	Terrapene_carolina_triunguis	71.4047	736
MA1533.2	Highly_Enriched	Promoter_G4	Poikilotherm	Terrapene_carolina_triunguis	75.6133	924
MA0753.3	Highly_Reduced	Promoter_G4	Poikilotherm	Terrapene_carolina_triunguis	92.8785	53014
MA1713.2	Moderately_Enriched	Promoter_G4	Poikilotherm	Terrapene_carolina_triunguis	87.1402	8763
MA1630.3	Moderately_Reduced	Promoter_G4	Poikilotherm	Terrapene_carolina_triunguis	88.3059	93417
MA1653.2	Moderately_Reduced	Promoter_G4	Poikilotherm	Terrapene_carolina_triunguis	89.6435	75309
MA1564.2	Highly_Reduced	Promoter_G4	Poikilotherm	Terrapene_carolina_triunguis	93.311	49710
MA2573.1	Highly_Enriched	Promoter_G4	Poikilotherm	Terrapene_carolina_triunguis	81.5087	1467
MA0146.3	Moderately_Enriched	Promoter_G4	Poikilotherm	Terrapene_carolina_triunguis	81.6171	2826
MA1516.2	Moderately_Enriched	Promoter_G4	Poikilotherm	Terrapene_carolina_triunguis	89.7802	8509
MA0821.2	Moderately_Enriched	Promoter_G4	Poikilotherm	Terrapene_carolina_triunguis	82.9	1000
MA0729.1	Highly_Enriched	Promoter_G4	Poikilotherm	Terrapene_carolina_triunguis	63.3485	514
MA1474.2	Highly_Enriched	Promoter_G4	Poikilotherm	Terrapene_carolina_triunguis	78.9679	436
MA0857.1	Moderately_Enriched	Promoter_G4	Poikilotherm	Terrapene_carolina_triunguis	61.4793	496
MA0526.5	Moderately_Reduced	Promoter_G4	Poikilotherm	Terrapene_carolina_triunguis	65.7493	367
MA0620.4	Moderately_Reduced	Promoter_G4	Poikilotherm	Terrapene_carolina_triunguis	60.7429	350
MA2340.1	Moderately_Enriched	Promoter_G4	Poikilotherm	Terrapene_carolina_triunguis	71.1047	869
MA0831.3	Moderately_Reduced	Promoter_G4	Poikilotherm	Terrapene_carolina_triunguis	62.525	400
MA2580.1	Moderately_Enriched	Promoter_G4	Poikilotherm	Terrapene_carolina_triunguis	56.8498	273
MA1979.2	Highly_Enriched	Promoter_G4	Poikilotherm	Terrapene_carolina_triunguis	67.3233	1132
MA0111.1	Highly_Reduced	Promoter_G4	Poikilotherm	Terrapene_carolina_triunguis	67.4542	1443
MA1602.2	Moderately_Reduced	Promoter_G4	Poikilotherm	Terrapene_carolina_triunguis	61.0283	122
MA0728.1	Highly_Enriched	Promoter_G4	Poikilotherm	Terrapene_carolina_triunguis	60.3019	552
MA2489.1	Moderately_Enriched	Promoter_G4	Poikilotherm	Terrapene_carolina_triunguis	36.9763	61
MA0646.2	Highly_Enriched	Promoter_G4	Poikilotherm	Terrapene_carolina_triunguis	74.4292	727
MA0685.2	Moderately_Reduced	Promoter_G4	Poikilotherm	Terrapene_carolina_triunguis	94.0676	70305
MA0079.5	Moderately_Reduced	Promoter_G4	Poikilotherm	Terrapene_carolina_triunguis	93.7866	74430
MA2582.1	Highly_Enriched	Promoter_G4	Poikilotherm	Terrapene_carolina_triunguis	64.4767	516
MA0478.2	Moderately_Enriched	Promoter_G4	Poikilotherm	Terrapene_carolina_triunguis	57.1491	228
MA0814.3	Moderately_Enriched	Promoter_G4	Poikilotherm	Terrapene_carolina_triunguis	87.7189	5223
MA0812.2	Moderately_Enriched	Promoter_G4	Poikilotherm	Terrapene_carolina_triunguis	90.94	6506
MA1553.2	Moderately_Enriched	Promoter_G4	Poikilotherm	Terrapene_carolina_triunguis	69.4544	344
MA2593.1	Moderately_Enriched	Promoter_G4	Poikilotherm	Terrapene_carolina_triunguis	8.61789	246
MA1559.2	Moderately_Enriched	Promoter_G4	Poikilotherm	Terrapene_carolina_triunguis	69.0687	939
MA0765.4	Highly_Reduced	Promoter_G4	Poikilotherm	Terrapene_carolina_triunguis	67.6479	385
MA0764.4	Highly_Reduced	Promoter_G4	Poikilotherm	Terrapene_carolina_triunguis	67.1078	403
MA0028.3	Highly_Reduced	Promoter_G4	Poikilotherm	Terrapene_carolina_triunguis	66.7553	376
MA0640.3	Moderately_Enriched	Promoter_G4	Poikilotherm	Terrapene_carolina_triunguis	60.5423	1045
MA0519.2	Moderately_Enriched	Promoter_G4	Poikilotherm	Terrapene_carolina_triunguis	52.5892	221
MA1585.2	Moderately_Enriched	Promoter_G4	Poikilotherm	Terrapene_carolina_triunguis	57.265	195
MA1513.2	Moderately_Enriched	Promoter_G4	Poikilotherm	Terrapene_carolina_triunguis	98.1023	21743
MA0837.3	Moderately_Reduced	Promoter_G4	Poikilotherm	Terrapene_carolina_triunguis	45.7692	26
MA1580.1	Moderately_Reduced	Promoter_G4	Poikilotherm	Terrapene_carolina_triunguis	42.5	36
MA2602.1	Moderately_Enriched	Promoter_G4	Poikilotherm	Terrapene_carolina_triunguis	87.2166	3087
MA2588.1	Highly_Enriched	Promoter_G4	Poikilotherm	Terrapene_carolina_triunguis	91.1128	3889
MA1099.3	Moderately_Enriched	Promoter_G4	Poikilotherm	Terrapene_carolina_triunguis	86.7293	892
MA0469.4	Moderately_Reduced	Promoter_G4	Poikilotherm	Terrapene_carolina_triunguis	58.0357	32
MA0632.3	Highly_Enriched	Promoter_G4	Poikilotherm	Terrapene_carolina_triunguis	92.9134	1143
MA0131.3	Moderately_Enriched	Promoter_G4	Poikilotherm	Terrapene_carolina_triunguis	84.7994	810
MA0745.3	Highly_Enriched	Promoter_G4	Poikilotherm	Terrapene_carolina_triunguis	71.067	1141
MA1998.2	Moderately_Enriched	Promoter_G4	Poikilotherm	Terrapene_carolina_triunguis	56.2751	249
MA1645.2	Highly_Enriched	Promoter_G4	Poikilotherm	Terrapene_carolina_triunguis	60.533	788
MA0807.1	Moderately_Enriched	Promoter_G4	Poikilotherm	Terrapene_carolina_triunguis	58.8148	675
MA0801.1	Moderately_Enriched	Promoter_G4	Poikilotherm	Terrapene_carolina_triunguis	58.6316	433
MA2597.1	Highly_Enriched	Promoter_G4	Poikilotherm	Terrapene_carolina_triunguis	45.2982	218
MA0136.4	Moderately_Enriched	Promoter_G4	Poikilotherm	Terrapene_carolina_triunguis	47.3771	529
MA1547.2	Moderately_Enriched	Promoter_G4	Poikilotherm	Terrapene_carolina_triunguis	42.1875	248
MA1125.2	Moderately_Enriched	Promoter_G4	Poikilotherm	Terrapene_carolina_triunguis	3.18878	294
MA2102.1	Moderately_Reduced	Promoter_G4	Poikilotherm	Terrapene_carolina_triunguis	37.5	14
MA1558.2	Highly_Enriched	Promoter_G4	Poikilotherm	Terrapene_carolina_triunguis	68.1438	1009
MA1117.2	Highly_Reduced	Promoter_G4	Poikilotherm	Terrapene_carolina_triunguis	57.1429	1207
MA1523.2	Highly_Enriched	Promoter_G4	Poikilotherm	Terrapene_carolina_triunguis	57.1429	410
MA0508.4	Highly_Enriched	Promoter_G4	Poikilotherm	Terrapene_carolina_triunguis	42.8571	348
MA0712.3	Highly_Enriched	Promoter_G4	Poikilotherm	Terrapene_carolina_triunguis	42.8571	223
MA0073.2	Highly_Reduced	Promoter_G4	Poikilotherm	Naja_naja	74.5463	9493
MA1712.2	Highly_Enriched	Promoter_G4	Poikilotherm	Naja_naja	84.2795	2003
MA1721.2	Moderately_Enriched	Promoter_G4	Poikilotherm	Naja_naja	88.6515	4246
MA0163.1	Highly_Reduced	Promoter_G4	Poikilotherm	Naja_naja	80.7255	9676
MA1987.2	Highly_Reduced	Promoter_G4	Poikilotherm	Naja_naja	74.9827	10054
MA2688.1	Highly_Reduced	Promoter_G4	Poikilotherm	Naja_naja	71.7431	10967
MA2553.1	Moderately_Enriched	Promoter_G4	Poikilotherm	Naja_naja	82.3463	892
MA2494.1	Moderately_Reduced	Promoter_G4	Poikilotherm	Naja_naja	73.8969	1710
MA1528.2	Highly_Enriched	Promoter_G4	Poikilotherm	Naja_naja	76.6837	420
MA2538.1	Moderately_Enriched	Promoter_G4	Poikilotherm	Naja_naja	92.893	3622
MA1531.2	Moderately_Reduced	Promoter_G4	Poikilotherm	Naja_naja	70.1394	543
MA2531.1	Moderately_Reduced	Promoter_G4	Poikilotherm	Naja_naja	66.0718	3698
MA0506.3	Highly_Enriched	Promoter_G4	Poikilotherm	Naja_naja	87.1013	951
MA0080.7	Highly_Reduced	Promoter_G4	Poikilotherm	Naja_naja	63.0104	2242
MA0781.2	Moderately_Reduced	Promoter_G4	Poikilotherm	Naja_naja	71.6398	93
MA2519.1	Highly_Reduced	Promoter_G4	Poikilotherm	Naja_naja	71.5573	888
MA0741.1	Highly_Reduced	Promoter_G4	Poikilotherm	Naja_naja	86.5141	15559
MA1654.2	Moderately_Reduced	Promoter_G4	Poikilotherm	Naja_naja	71.4408	779
MA2545.1	Highly_Enriched	Promoter_G4	Poikilotherm	Naja_naja	67.9612	309
MA0747.2	Highly_Reduced	Promoter_G4	Poikilotherm	Naja_naja	85.3115	14969
MA0145.2	Highly_Enriched	Promoter_G4	Poikilotherm	Naja_naja	77.9063	494
MA0081.3	Highly_Reduced	Promoter_G4	Poikilotherm	Naja_naja	63.195	1342
MA2534.1	Moderately_Reduced	Promoter_G4	Poikilotherm	Naja_naja	68.7176	526
MA1114.2	Moderately_Enriched	Promoter_G4	Poikilotherm	Naja_naja	62.6623	168
MA2573.1	Highly_Enriched	Promoter_G4	Poikilotherm	Naja_naja	81.396	511
MA1532.2	Highly_Reduced	Promoter_G4	Poikilotherm	Naja_naja	67.2659	356
MA2528.1	Highly_Enriched	Promoter_G4	Poikilotherm	Naja_naja	72.729	322
MA0472.2	Moderately_Enriched	Promoter_G4	Poikilotherm	Naja_naja	86.7473	1173
MA1714.2	Highly_Reduced	Promoter_G4	Poikilotherm	Naja_naja	62.7677	661
MA2539.1	Moderately_Enriched	Promoter_G4	Poikilotherm	Naja_naja	97.7036	5378
MA2328.1	Moderately_Enriched	Promoter_G4	Poikilotherm	Naja_naja	92.7425	8175
MA0753.3	Highly_Reduced	Promoter_G4	Poikilotherm	Naja_naja	87.8366	40562
MA1713.2	Moderately_Enriched	Promoter_G4	Poikilotherm	Naja_naja	88.6548	3271
MA1630.3	Moderately_Reduced	Promoter_G4	Poikilotherm	Naja_naja	84.8769	31641
MA1653.2	Moderately_Reduced	Promoter_G4	Poikilotherm	Naja_naja	85.8142	26585
MA1564.2	Highly_Reduced	Promoter_G4	Poikilotherm	Naja_naja	89.9986	14451
MA0736.1	Moderately_Reduced	Promoter_G4	Poikilotherm	Naja_naja	82.8913	3183
MA0146.3	Moderately_Enriched	Promoter_G4	Poikilotherm	Naja_naja	81.6836	689
MA1516.2	Moderately_Enriched	Promoter_G4	Poikilotherm	Naja_naja	90.2107	2990
MA0729.1	Highly_Enriched	Promoter_G4	Poikilotherm	Naja_naja	62.2863	156
MA0258.2	Highly_Enriched	Promoter_G4	Poikilotherm	Naja_naja	71.0802	216
MA0728.1	Highly_Enriched	Promoter_G4	Poikilotherm	Naja_naja	62.6398	149
MA0526.5	Moderately_Reduced	Promoter_G4	Poikilotherm	Naja_naja	63.8608	158
MA0620.4	Moderately_Reduced	Promoter_G4	Poikilotherm	Naja_naja	58	110
MA2340.1	Moderately_Enriched	Promoter_G4	Poikilotherm	Naja_naja	72.6163	344
MA0831.3	Moderately_Reduced	Promoter_G4	Poikilotherm	Naja_naja	60.7353	136
MA2582.1	Highly_Enriched	Promoter_G4	Poikilotherm	Naja_naja	62.5989	177
MA2493.1	Moderately_Enriched	Promoter_G4	Poikilotherm	Naja_naja	69.1589	107
MA0821.2	Moderately_Enriched	Promoter_G4	Poikilotherm	Naja_naja	83.8596	342
MA2524.1	Moderately_Enriched	Promoter_G4	Poikilotherm	Naja_naja	63.0802	158
MA0685.2	Moderately_Reduced	Promoter_G4	Poikilotherm	Naja_naja	91.3344	22254
MA0079.5	Moderately_Reduced	Promoter_G4	Poikilotherm	Naja_naja	91.1788	23519
MA0478.2	Moderately_Enriched	Promoter_G4	Poikilotherm	Naja_naja	55.625	32
MA1533.2	Highly_Enriched	Promoter_G4	Poikilotherm	Naja_naja	80.8065	248
MA0814.3	Moderately_Enriched	Promoter_G4	Poikilotherm	Naja_naja	86.7323	1185
MA0812.2	Moderately_Enriched	Promoter_G4	Poikilotherm	Naja_naja	89.9746	1310
MA2593.1	Moderately_Enriched	Promoter_G4	Poikilotherm	Naja_naja	12.0851	235
MA0111.1	Highly_Reduced	Promoter_G4	Poikilotherm	Naja_naja	65.7561	416
MA1474.2	Highly_Enriched	Promoter_G4	Poikilotherm	Naja_naja	80.514	214
MA2580.1	Moderately_Enriched	Promoter_G4	Poikilotherm	Naja_naja	56.2687	67
MA2489.1	Moderately_Enriched	Promoter_G4	Poikilotherm	Naja_naja	39.4799	47
MA0765.4	Highly_Reduced	Promoter_G4	Poikilotherm	Naja_naja	70.3476	163
MA0764.4	Highly_Reduced	Promoter_G4	Poikilotherm	Naja_naja	70.5026	168
MA0028.3	Highly_Reduced	Promoter_G4	Poikilotherm	Naja_naja	69.9387	163
MA0640.3	Moderately_Enriched	Promoter_G4	Poikilotherm	Naja_naja	58.6871	479
MA1979.2	Highly_Enriched	Promoter_G4	Poikilotherm	Naja_naja	66.805	241
MA0519.2	Moderately_Enriched	Promoter_G4	Poikilotherm	Naja_naja	51.4991	126
MA0646.2	Highly_Enriched	Promoter_G4	Poikilotherm	Naja_naja	74.2614	176
MA0857.1	Moderately_Enriched	Promoter_G4	Poikilotherm	Naja_naja	58.663	158
MA1602.2	Moderately_Reduced	Promoter_G4	Poikilotherm	Naja_naja	67.0846	29
MA1559.2	Moderately_Enriched	Promoter_G4	Poikilotherm	Naja_naja	70.943	304
MA0469.4	Moderately_Reduced	Promoter_G4	Poikilotherm	Naja_naja	54.5918	28
MA1513.2	Moderately_Enriched	Promoter_G4	Poikilotherm	Naja_naja	97.8437	9739
MA1553.2	Moderately_Enriched	Promoter_G4	Poikilotherm	Naja_naja	69.1254	73
MA2602.1	Moderately_Enriched	Promoter_G4	Poikilotherm	Naja_naja	88.9469	933
MA2588.1	Highly_Enriched	Promoter_G4	Poikilotherm	Naja_naja	91.9808	1300
MA1099.3	Moderately_Enriched	Promoter_G4	Poikilotherm	Naja_naja	89.6699	409
MA1585.2	Moderately_Enriched	Promoter_G4	Poikilotherm	Naja_naja	53.9295	41
MA0632.3	Highly_Enriched	Promoter_G4	Poikilotherm	Naja_naja	94.035	658
MA0131.3	Moderately_Enriched	Promoter_G4	Poikilotherm	Naja_naja	84.3895	430
MA0745.3	Highly_Enriched	Promoter_G4	Poikilotherm	Naja_naja	70.7143	315
MA0837.3	Moderately_Reduced	Promoter_G4	Poikilotherm	Naja_naja	50.4545	22
MA1998.2	Moderately_Enriched	Promoter_G4	Poikilotherm	Naja_naja	56.3889	45
MA1645.2	Highly_Enriched	Promoter_G4	Poikilotherm	Naja_naja	61.1413	230
MA0807.1	Moderately_Enriched	Promoter_G4	Poikilotherm	Naja_naja	58.0307	179
MA0801.1	Moderately_Enriched	Promoter_G4	Poikilotherm	Naja_naja	55.9343	99
MA1580.1	Moderately_Reduced	Promoter_G4	Poikilotherm	Naja_naja	45	4
MA2597.1	Highly_Enriched	Promoter_G4	Poikilotherm	Naja_naja	46.9231	65
MA0136.4	Moderately_Enriched	Promoter_G4	Poikilotherm	Naja_naja	47.9915	529
MA1547.2	Moderately_Enriched	Promoter_G4	Poikilotherm	Naja_naja	41.5441	68
MA1125.2	Moderately_Enriched	Promoter_G4	Poikilotherm	Naja_naja	3.9916	238
MA2102.1	Moderately_Reduced	Promoter_G4	Poikilotherm	Naja_naja	37.5	6
MA1558.2	Highly_Enriched	Promoter_G4	Poikilotherm	Naja_naja	67.8796	318
MA1117.2	Highly_Reduced	Promoter_G4	Poikilotherm	Naja_naja	57.1429	490
MA1523.2	Highly_Enriched	Promoter_G4	Poikilotherm	Naja_naja	57.1429	156
MA0508.4	Highly_Enriched	Promoter_G4	Poikilotherm	Naja_naja	42.8571	445
MA0712.3	Highly_Enriched	Promoter_G4	Poikilotherm	Naja_naja	42.8571	70
MA0073.2	Highly_Reduced	Promoter_G4	Poikilotherm	Podarcis_muralis	72.7007	12677
MA1721.2	Moderately_Enriched	Promoter_G4	Poikilotherm	Podarcis_muralis	88.9755	5239
MA2688.1	Highly_Reduced	Promoter_G4	Poikilotherm	Podarcis_muralis	72.1993	12084
MA1712.2	Highly_Enriched	Promoter_G4	Poikilotherm	Podarcis_muralis	83.8435	2206
MA0163.1	Highly_Reduced	Promoter_G4	Poikilotherm	Podarcis_muralis	80.7536	12409
MA2494.1	Moderately_Reduced	Promoter_G4	Poikilotherm	Podarcis_muralis	73.3736	2145
MA2538.1	Moderately_Enriched	Promoter_G4	Poikilotherm	Podarcis_muralis	92.211	4654
MA1987.2	Highly_Reduced	Promoter_G4	Poikilotherm	Podarcis_muralis	75.3645	11833
MA2531.1	Moderately_Reduced	Promoter_G4	Poikilotherm	Podarcis_muralis	66.1189	4345
MA0506.3	Highly_Enriched	Promoter_G4	Poikilotherm	Podarcis_muralis	88.2709	1308
MA2519.1	Highly_Reduced	Promoter_G4	Poikilotherm	Podarcis_muralis	69.2086	1657
MA2553.1	Moderately_Enriched	Promoter_G4	Poikilotherm	Podarcis_muralis	82.0994	928
MA0736.1	Moderately_Reduced	Promoter_G4	Poikilotherm	Podarcis_muralis	82.7712	4536
MA0080.7	Highly_Reduced	Promoter_G4	Poikilotherm	Podarcis_muralis	62.9509	2527
MA1654.2	Moderately_Reduced	Promoter_G4	Poikilotherm	Podarcis_muralis	70.3198	932
MA2545.1	Highly_Enriched	Promoter_G4	Poikilotherm	Podarcis_muralis	67.2114	436
MA2573.1	Highly_Enriched	Promoter_G4	Poikilotherm	Podarcis_muralis	81.1089	493
MA2489.1	Moderately_Enriched	Promoter_G4	Poikilotherm	Podarcis_muralis	39.4918	129
MA0741.1	Highly_Reduced	Promoter_G4	Poikilotherm	Podarcis_muralis	88.4558	21819
MA2528.1	Highly_Enriched	Promoter_G4	Poikilotherm	Podarcis_muralis	71.0092	545
MA0258.2	Highly_Enriched	Promoter_G4	Poikilotherm	Podarcis_muralis	70.7667	400
MA1714.2	Highly_Reduced	Promoter_G4	Poikilotherm	Podarcis_muralis	63.2265	921
MA1532.2	Highly_Reduced	Promoter_G4	Poikilotherm	Podarcis_muralis	69.9603	336
MA0747.2	Highly_Reduced	Promoter_G4	Poikilotherm	Podarcis_muralis	87.286	22432
MA0145.2	Highly_Enriched	Promoter_G4	Poikilotherm	Podarcis_muralis	74.077	445
MA2524.1	Moderately_Enriched	Promoter_G4	Poikilotherm	Podarcis_muralis	63.4796	254
MA0472.2	Moderately_Enriched	Promoter_G4	Poikilotherm	Podarcis_muralis	85.7995	1249
MA0081.3	Highly_Reduced	Promoter_G4	Poikilotherm	Podarcis_muralis	63.0569	1535
MA1531.2	Moderately_Reduced	Promoter_G4	Poikilotherm	Podarcis_muralis	73.2332	566
MA2534.1	Moderately_Reduced	Promoter_G4	Poikilotherm	Podarcis_muralis	65.8796	770
MA2539.1	Moderately_Enriched	Promoter_G4	Poikilotherm	Podarcis_muralis	97.6889	6153
MA2328.1	Moderately_Enriched	Promoter_G4	Poikilotherm	Podarcis_muralis	93.049	10374
MA2493.1	Moderately_Enriched	Promoter_G4	Poikilotherm	Podarcis_muralis	69.6091	183
MA0857.1	Moderately_Enriched	Promoter_G4	Poikilotherm	Podarcis_muralis	61.4988	206
MA1114.2	Moderately_Enriched	Promoter_G4	Poikilotherm	Podarcis_muralis	63.7675	208
MA0753.3	Highly_Reduced	Promoter_G4	Poikilotherm	Podarcis_muralis	89.1596	58841
MA1713.2	Moderately_Enriched	Promoter_G4	Poikilotherm	Podarcis_muralis	88.5181	3779
MA1630.3	Moderately_Reduced	Promoter_G4	Poikilotherm	Podarcis_muralis	86.7246	41137
MA1653.2	Moderately_Reduced	Promoter_G4	Poikilotherm	Podarcis_muralis	87.6859	35266
MA1564.2	Highly_Reduced	Promoter_G4	Poikilotherm	Podarcis_muralis	91.9505	21969
MA0146.3	Moderately_Enriched	Promoter_G4	Poikilotherm	Podarcis_muralis	81.2621	824
MA1516.2	Moderately_Enriched	Promoter_G4	Poikilotherm	Podarcis_muralis	89.7226	3172
MA0729.1	Highly_Enriched	Promoter_G4	Poikilotherm	Podarcis_muralis	63.9918	189
MA1474.2	Highly_Enriched	Promoter_G4	Poikilotherm	Podarcis_muralis	78.7611	226
MA2340.1	Moderately_Enriched	Promoter_G4	Poikilotherm	Podarcis_muralis	69.6928	293
MA0111.1	Highly_Reduced	Promoter_G4	Poikilotherm	Podarcis_muralis	66.8863	414
MA1528.2	Highly_Enriched	Promoter_G4	Poikilotherm	Podarcis_muralis	76.8581	617
MA0821.2	Moderately_Enriched	Promoter_G4	Poikilotherm	Podarcis_muralis	83.3155	374
MA0685.2	Moderately_Reduced	Promoter_G4	Poikilotherm	Podarcis_muralis	93.4942	32839
MA0079.5	Moderately_Reduced	Promoter_G4	Poikilotherm	Podarcis_muralis	93.0987	34742
MA0469.4	Moderately_Reduced	Promoter_G4	Poikilotherm	Podarcis_muralis	49.7143	25
MA2582.1	Highly_Enriched	Promoter_G4	Poikilotherm	Podarcis_muralis	64.4882	254
MA0478.2	Moderately_Enriched	Promoter_G4	Poikilotherm	Podarcis_muralis	58.6667	60
MA0814.3	Moderately_Enriched	Promoter_G4	Poikilotherm	Podarcis_muralis	85.6633	1464
MA0812.2	Moderately_Enriched	Promoter_G4	Poikilotherm	Podarcis_muralis	89.7305	1505
MA2593.1	Moderately_Enriched	Promoter_G4	Poikilotherm	Podarcis_muralis	8.39506	486
MA1553.2	Moderately_Enriched	Promoter_G4	Poikilotherm	Podarcis_muralis	65.9951	126
MA1979.2	Highly_Enriched	Promoter_G4	Poikilotherm	Podarcis_muralis	68.2271	361
MA0526.5	Moderately_Reduced	Promoter_G4	Poikilotherm	Podarcis_muralis	66.3415	123
MA0620.4	Moderately_Reduced	Promoter_G4	Poikilotherm	Podarcis_muralis	60.9756	82
MA0831.3	Moderately_Reduced	Promoter_G4	Poikilotherm	Podarcis_muralis	62.4731	93
MA1580.1	Moderately_Reduced	Promoter_G4	Poikilotherm	Podarcis_muralis	40	18
MA0646.2	Highly_Enriched	Promoter_G4	Poikilotherm	Podarcis_muralis	72.0225	178
MA2580.1	Moderately_Enriched	Promoter_G4	Poikilotherm	Podarcis_muralis	58.2432	74
MA1533.2	Highly_Enriched	Promoter_G4	Poikilotherm	Podarcis_muralis	76.4256	401
MA1559.2	Moderately_Enriched	Promoter_G4	Poikilotherm	Podarcis_muralis	69.5767	504
MA0765.4	Highly_Reduced	Promoter_G4	Poikilotherm	Podarcis_muralis	65.5629	151
MA0764.4	Highly_Reduced	Promoter_G4	Poikilotherm	Podarcis_muralis	66.4352	144
MA0028.3	Highly_Reduced	Promoter_G4	Poikilotherm	Podarcis_muralis	66.2551	135
MA0640.3	Moderately_Enriched	Promoter_G4	Poikilotherm	Podarcis_muralis	58.5023	592
MA0781.2	Moderately_Reduced	Promoter_G4	Poikilotherm	Podarcis_muralis	73.7158	73
MA0728.1	Highly_Enriched	Promoter_G4	Poikilotherm	Podarcis_muralis	62.5086	194
MA0519.2	Moderately_Enriched	Promoter_G4	Poikilotherm	Podarcis_muralis	49.5604	139
MA1513.2	Moderately_Enriched	Promoter_G4	Poikilotherm	Podarcis_muralis	98.0576	11725
MA2602.1	Moderately_Enriched	Promoter_G4	Poikilotherm	Podarcis_muralis	87.2095	1334
MA2588.1	Highly_Enriched	Promoter_G4	Poikilotherm	Podarcis_muralis	91.5547	1563
MA1099.3	Moderately_Enriched	Promoter_G4	Poikilotherm	Podarcis_muralis	91.1579	516
MA1585.2	Moderately_Enriched	Promoter_G4	Poikilotherm	Podarcis_muralis	58.2437	62
MA0632.3	Highly_Enriched	Promoter_G4	Poikilotherm	Podarcis_muralis	94.8129	882
MA0131.3	Moderately_Enriched	Promoter_G4	Poikilotherm	Podarcis_muralis	84.7458	413
MA0745.3	Highly_Enriched	Promoter_G4	Poikilotherm	Podarcis_muralis	69.6291	519
MA0837.3	Moderately_Reduced	Promoter_G4	Poikilotherm	Podarcis_muralis	43.3333	9
MA1602.2	Moderately_Reduced	Promoter_G4	Poikilotherm	Podarcis_muralis	64.4628	44
MA1998.2	Moderately_Enriched	Promoter_G4	Poikilotherm	Podarcis_muralis	55.163	46
MA1645.2	Highly_Enriched	Promoter_G4	Poikilotherm	Podarcis_muralis	59.5331	257
MA0807.1	Moderately_Enriched	Promoter_G4	Poikilotherm	Podarcis_muralis	60.1461	308
MA0801.1	Moderately_Enriched	Promoter_G4	Poikilotherm	Podarcis_muralis	58.0682	110
MA2597.1	Highly_Enriched	Promoter_G4	Poikilotherm	Podarcis_muralis	45.9239	138
MA0136.4	Moderately_Enriched	Promoter_G4	Poikilotherm	Podarcis_muralis	48.385	565
MA1547.2	Moderately_Enriched	Promoter_G4	Poikilotherm	Podarcis_muralis	40.9247	146
MA1125.2	Moderately_Enriched	Promoter_G4	Poikilotherm	Podarcis_muralis	3.82231	726
MA2102.1	Moderately_Reduced	Promoter_G4	Poikilotherm	Podarcis_muralis	37.5	4
MA1558.2	Highly_Enriched	Promoter_G4	Poikilotherm	Podarcis_muralis	69.4296	536
MA1117.2	Highly_Reduced	Promoter_G4	Poikilotherm	Podarcis_muralis	57.1429	668
MA1523.2	Highly_Enriched	Promoter_G4	Poikilotherm	Podarcis_muralis	57.1429	120
MA0508.4	Highly_Enriched	Promoter_G4	Poikilotherm	Podarcis_muralis	42.8571	455
MA0712.3	Highly_Enriched	Promoter_G4	Poikilotherm	Podarcis_muralis	42.8571	150
MA0073.2	Highly_Reduced	Promoter_G4	Poikilotherm	Salvator_merianae	76.5884	7635
MA2553.1	Moderately_Enriched	Promoter_G4	Poikilotherm	Salvator_merianae	82.5642	863
MA2688.1	Highly_Reduced	Promoter_G4	Poikilotherm	Salvator_merianae	73.17	10625
MA1721.2	Moderately_Enriched	Promoter_G4	Poikilotherm	Salvator_merianae	87.9701	4927
MA0163.1	Highly_Reduced	Promoter_G4	Poikilotherm	Salvator_merianae	81.8593	9659
MA1712.2	Highly_Enriched	Promoter_G4	Poikilotherm	Salvator_merianae	84.4459	1973
MA1531.2	Moderately_Reduced	Promoter_G4	Poikilotherm	Salvator_merianae	73.5333	543
MA1714.2	Highly_Reduced	Promoter_G4	Poikilotherm	Salvator_merianae	64.2105	715
MA2494.1	Moderately_Reduced	Promoter_G4	Poikilotherm	Salvator_merianae	74.0743	1532
MA1987.2	Highly_Reduced	Promoter_G4	Poikilotherm	Salvator_merianae	76.573	10567
MA2538.1	Moderately_Enriched	Promoter_G4	Poikilotherm	Salvator_merianae	92.3618	4124
MA0145.2	Highly_Enriched	Promoter_G4	Poikilotherm	Salvator_merianae	77.8039	456
MA1532.2	Highly_Reduced	Promoter_G4	Poikilotherm	Salvator_merianae	70.8	300
MA0506.3	Highly_Enriched	Promoter_G4	Poikilotherm	Salvator_merianae	87.7996	1196
MA0080.7	Highly_Reduced	Promoter_G4	Poikilotherm	Salvator_merianae	63.4004	2045
MA2531.1	Moderately_Reduced	Promoter_G4	Poikilotherm	Salvator_merianae	66.3041	3641
MA0081.3	Highly_Reduced	Promoter_G4	Poikilotherm	Salvator_merianae	63.3457	1328
MA1654.2	Moderately_Reduced	Promoter_G4	Poikilotherm	Salvator_merianae	70.2101	766
MA0741.1	Highly_Reduced	Promoter_G4	Poikilotherm	Salvator_merianae	89.2204	16624
MA0747.2	Highly_Reduced	Promoter_G4	Poikilotherm	Salvator_merianae	88.3924	16125
MA0472.2	Moderately_Enriched	Promoter_G4	Poikilotherm	Salvator_merianae	86.9343	1139
MA2519.1	Highly_Reduced	Promoter_G4	Poikilotherm	Salvator_merianae	71.7947	917
MA0258.2	Highly_Enriched	Promoter_G4	Poikilotherm	Salvator_merianae	72.8511	235
MA2534.1	Moderately_Reduced	Promoter_G4	Poikilotherm	Salvator_merianae	65.1366	406
MA0111.1	Highly_Reduced	Promoter_G4	Poikilotherm	Salvator_merianae	67.7686	440
MA0736.1	Moderately_Reduced	Promoter_G4	Poikilotherm	Salvator_merianae	84.7598	3360
MA1528.2	Highly_Enriched	Promoter_G4	Poikilotherm	Salvator_merianae	78.5714	460
MA2573.1	Highly_Enriched	Promoter_G4	Poikilotherm	Salvator_merianae	81.6032	420
MA2545.1	Highly_Enriched	Promoter_G4	Poikilotherm	Salvator_merianae	67.7946	314
MA2539.1	Moderately_Enriched	Promoter_G4	Poikilotherm	Salvator_merianae	98.1558	6122
MA2328.1	Moderately_Enriched	Promoter_G4	Poikilotherm	Salvator_merianae	93.1932	8490
MA0753.3	Highly_Reduced	Promoter_G4	Poikilotherm	Salvator_merianae	90.0672	41203
MA1713.2	Moderately_Enriched	Promoter_G4	Poikilotherm	Salvator_merianae	88.6619	3206
MA1630.3	Moderately_Reduced	Promoter_G4	Poikilotherm	Salvator_merianae	86.7884	32025
MA1653.2	Moderately_Reduced	Promoter_G4	Poikilotherm	Salvator_merianae	87.7289	28260
MA1564.2	Highly_Reduced	Promoter_G4	Poikilotherm	Salvator_merianae	92.6332	16554
MA2528.1	Highly_Enriched	Promoter_G4	Poikilotherm	Salvator_merianae	73.238	376
MA1516.2	Moderately_Enriched	Promoter_G4	Poikilotherm	Salvator_merianae	91.0825	2679
MA1474.2	Highly_Enriched	Promoter_G4	Poikilotherm	Salvator_merianae	80.6358	173
MA0729.1	Highly_Enriched	Promoter_G4	Poikilotherm	Salvator_merianae	64.7595	134
MA0526.5	Moderately_Reduced	Promoter_G4	Poikilotherm	Salvator_merianae	65.9048	105
MA0620.4	Moderately_Reduced	Promoter_G4	Poikilotherm	Salvator_merianae	64.4737	76
MA2340.1	Moderately_Enriched	Promoter_G4	Poikilotherm	Salvator_merianae	70.6494	308
MA0831.3	Moderately_Reduced	Promoter_G4	Poikilotherm	Salvator_merianae	65.3191	94
MA0469.4	Moderately_Reduced	Promoter_G4	Poikilotherm	Salvator_merianae	51.6484	26
MA2580.1	Moderately_Enriched	Promoter_G4	Poikilotherm	Salvator_merianae	58.9062	64
MA1979.2	Highly_Enriched	Promoter_G4	Poikilotherm	Salvator_merianae	67.4439	223
MA1114.2	Moderately_Enriched	Promoter_G4	Poikilotherm	Salvator_merianae	65.7105	206
MA0146.3	Moderately_Enriched	Promoter_G4	Poikilotherm	Salvator_merianae	81.0938	576
MA2493.1	Moderately_Enriched	Promoter_G4	Poikilotherm	Salvator_merianae	70.1066	202
MA0646.2	Highly_Enriched	Promoter_G4	Poikilotherm	Salvator_merianae	72.518	139
MA0685.2	Moderately_Reduced	Promoter_G4	Poikilotherm	Salvator_merianae	93.2534	25618
MA0079.5	Moderately_Reduced	Promoter_G4	Poikilotherm	Salvator_merianae	93.0124	26827
MA0728.1	Highly_Enriched	Promoter_G4	Poikilotherm	Salvator_merianae	66.1587	105
MA2524.1	Moderately_Enriched	Promoter_G4	Poikilotherm	Salvator_merianae	63.2275	180
MA2582.1	Highly_Enriched	Promoter_G4	Poikilotherm	Salvator_merianae	63.9773	176
MA0478.2	Moderately_Enriched	Promoter_G4	Poikilotherm	Salvator_merianae	58.2353	51
MA1533.2	Highly_Enriched	Promoter_G4	Poikilotherm	Salvator_merianae	80.2034	295
MA2489.1	Moderately_Enriched	Promoter_G4	Poikilotherm	Salvator_merianae	40.0794	70
MA0814.3	Moderately_Enriched	Promoter_G4	Poikilotherm	Salvator_merianae	87.4654	1085
MA0812.2	Moderately_Enriched	Promoter_G4	Poikilotherm	Salvator_merianae	91.1209	1359
MA0821.2	Moderately_Enriched	Promoter_G4	Poikilotherm	Salvator_merianae	83.9683	252
MA0781.2	Moderately_Reduced	Promoter_G4	Poikilotherm	Salvator_merianae	75.1953	96
MA2593.1	Moderately_Enriched	Promoter_G4	Poikilotherm	Salvator_merianae	11.4205	176
MA1559.2	Moderately_Enriched	Promoter_G4	Poikilotherm	Salvator_merianae	69.8885	269
MA0765.4	Highly_Reduced	Promoter_G4	Poikilotherm	Salvator_merianae	68.1481	120
MA0764.4	Highly_Reduced	Promoter_G4	Poikilotherm	Salvator_merianae	67.9522	121
MA0028.3	Highly_Reduced	Promoter_G4	Poikilotherm	Salvator_merianae	67.8704	120
MA0640.3	Moderately_Enriched	Promoter_G4	Poikilotherm	Salvator_merianae	58.2869	419
MA0519.2	Moderately_Enriched	Promoter_G4	Poikilotherm	Salvator_merianae	51.8072	83
MA1585.2	Moderately_Enriched	Promoter_G4	Poikilotherm	Salvator_merianae	55.3535	55
MA1553.2	Moderately_Enriched	Promoter_G4	Poikilotherm	Salvator_merianae	67.334	73
MA0837.3	Moderately_Reduced	Promoter_G4	Poikilotherm	Salvator_merianae	53.3333	12
MA1513.2	Moderately_Enriched	Promoter_G4	Poikilotherm	Salvator_merianae	98.0577	10239
MA0857.1	Moderately_Enriched	Promoter_G4	Poikilotherm	Salvator_merianae	62.0673	130
MA2602.1	Moderately_Enriched	Promoter_G4	Poikilotherm	Salvator_merianae	89.0342	994
MA2588.1	Highly_Enriched	Promoter_G4	Poikilotherm	Salvator_merianae	92.1493	1226
MA1099.3	Moderately_Enriched	Promoter_G4	Poikilotherm	Salvator_merianae	90.4912	397
MA1580.1	Moderately_Reduced	Promoter_G4	Poikilotherm	Salvator_merianae	33.75	8
MA0632.3	Highly_Enriched	Promoter_G4	Poikilotherm	Salvator_merianae	94.9031	645
MA0131.3	Moderately_Enriched	Promoter_G4	Poikilotherm	Salvator_merianae	84.9943	439
MA0745.3	Highly_Enriched	Promoter_G4	Poikilotherm	Salvator_merianae	70.5251	338
MA1998.2	Moderately_Enriched	Promoter_G4	Poikilotherm	Salvator_merianae	57.2222	45
MA1645.2	Highly_Enriched	Promoter_G4	Poikilotherm	Salvator_merianae	59.8485	198
MA0807.1	Moderately_Enriched	Promoter_G4	Poikilotherm	Salvator_merianae	57.7419	155
MA0801.1	Moderately_Enriched	Promoter_G4	Poikilotherm	Salvator_merianae	56.6176	85
MA2597.1	Highly_Enriched	Promoter_G4	Poikilotherm	Salvator_merianae	46.875	92
MA0136.4	Moderately_Enriched	Promoter_G4	Poikilotherm	Salvator_merianae	48.1739	486
MA1547.2	Moderately_Enriched	Promoter_G4	Poikilotherm	Salvator_merianae	40	110
MA1602.2	Moderately_Reduced	Promoter_G4	Poikilotherm	Salvator_merianae	63.1818	20
MA1125.2	Moderately_Enriched	Promoter_G4	Poikilotherm	Salvator_merianae	3.49162	179
MA2102.1	Moderately_Reduced	Promoter_G4	Poikilotherm	Salvator_merianae	37.5	4
MA1558.2	Highly_Enriched	Promoter_G4	Poikilotherm	Salvator_merianae	67.4927	294
MA1117.2	Highly_Reduced	Promoter_G4	Poikilotherm	Salvator_merianae	57.1429	513
MA1523.2	Highly_Enriched	Promoter_G4	Poikilotherm	Salvator_merianae	57.1429	83
MA0508.4	Highly_Enriched	Promoter_G4	Poikilotherm	Salvator_merianae	42.8571	358
MA0712.3	Highly_Enriched	Promoter_G4	Poikilotherm	Salvator_merianae	42.8571	103
MA0073.2	Highly_Reduced	Promoter_G4	Poikilotherm	Gopherus_evgoodei	73.818	24073
MA1712.2	Highly_Enriched	Promoter_G4	Poikilotherm	Gopherus_evgoodei	84.4027	10713
MA1721.2	Moderately_Enriched	Promoter_G4	Poikilotherm	Gopherus_evgoodei	85.9316	9468
MA0163.1	Highly_Reduced	Promoter_G4	Poikilotherm	Gopherus_evgoodei	80.39	28986
MA2528.1	Highly_Enriched	Promoter_G4	Poikilotherm	Gopherus_evgoodei	74.0927	2287
MA2531.1	Moderately_Reduced	Promoter_G4	Poikilotherm	Gopherus_evgoodei	67.1451	4724
MA2545.1	Highly_Enriched	Promoter_G4	Poikilotherm	Gopherus_evgoodei	68.6303	1044
MA2688.1	Highly_Reduced	Promoter_G4	Poikilotherm	Gopherus_evgoodei	73.2512	15832
MA1714.2	Highly_Reduced	Promoter_G4	Poikilotherm	Gopherus_evgoodei	64.7068	999
MA1987.2	Highly_Reduced	Promoter_G4	Poikilotherm	Gopherus_evgoodei	76.583	17582
MA2553.1	Moderately_Enriched	Promoter_G4	Poikilotherm	Gopherus_evgoodei	83.1675	2123
MA2519.1	Highly_Reduced	Promoter_G4	Poikilotherm	Gopherus_evgoodei	72.4938	1683
MA2494.1	Moderately_Reduced	Promoter_G4	Poikilotherm	Gopherus_evgoodei	75.6631	4329
MA2538.1	Moderately_Enriched	Promoter_G4	Poikilotherm	Gopherus_evgoodei	92.0338	5811
MA0506.3	Highly_Enriched	Promoter_G4	Poikilotherm	Gopherus_evgoodei	86.3712	2894
MA0145.2	Highly_Enriched	Promoter_G4	Poikilotherm	Gopherus_evgoodei	80.888	2442
MA1654.2	Moderately_Reduced	Promoter_G4	Poikilotherm	Gopherus_evgoodei	72.5748	2451
MA1553.2	Moderately_Enriched	Promoter_G4	Poikilotherm	Gopherus_evgoodei	71.2375	322
MA1531.2	Moderately_Reduced	Promoter_G4	Poikilotherm	Gopherus_evgoodei	73.311	2603
MA0736.1	Moderately_Reduced	Promoter_G4	Poikilotherm	Gopherus_evgoodei	81.9169	10101
MA1528.2	Highly_Enriched	Promoter_G4	Poikilotherm	Gopherus_evgoodei	79.6637	2145
MA0741.1	Highly_Reduced	Promoter_G4	Poikilotherm	Gopherus_evgoodei	87.6329	36878
MA0747.2	Highly_Reduced	Promoter_G4	Poikilotherm	Gopherus_evgoodei	86.3351	33084
MA1532.2	Highly_Reduced	Promoter_G4	Poikilotherm	Gopherus_evgoodei	70.5874	1816
MA2573.1	Highly_Enriched	Promoter_G4	Poikilotherm	Gopherus_evgoodei	82.2222	1617
MA2493.1	Moderately_Enriched	Promoter_G4	Poikilotherm	Gopherus_evgoodei	70.7893	765
MA0728.1	Highly_Enriched	Promoter_G4	Poikilotherm	Gopherus_evgoodei	62.7332	461
MA2534.1	Moderately_Reduced	Promoter_G4	Poikilotherm	Gopherus_evgoodei	71.6851	1762
MA1602.2	Moderately_Reduced	Promoter_G4	Poikilotherm	Gopherus_evgoodei	61.2795	108
MA0258.2	Highly_Enriched	Promoter_G4	Poikilotherm	Gopherus_evgoodei	74.5215	1369
MA1114.2	Moderately_Enriched	Promoter_G4	Poikilotherm	Gopherus_evgoodei	63.897	837
MA0472.2	Moderately_Enriched	Promoter_G4	Poikilotherm	Gopherus_evgoodei	85.4048	2484
MA0081.3	Highly_Reduced	Promoter_G4	Poikilotherm	Gopherus_evgoodei	64.3258	1918
MA0080.7	Highly_Reduced	Promoter_G4	Poikilotherm	Gopherus_evgoodei	63.7869	2323
MA0729.1	Highly_Enriched	Promoter_G4	Poikilotherm	Gopherus_evgoodei	63.9598	431
MA2539.1	Moderately_Enriched	Promoter_G4	Poikilotherm	Gopherus_evgoodei	97.363	14251
MA2328.1	Moderately_Enriched	Promoter_G4	Poikilotherm	Gopherus_evgoodei	93.1619	21335
MA0753.3	Highly_Reduced	Promoter_G4	Poikilotherm	Gopherus_evgoodei	88.9663	76803
MA1713.2	Moderately_Enriched	Promoter_G4	Poikilotherm	Gopherus_evgoodei	86.9266	8606
MA1630.3	Moderately_Reduced	Promoter_G4	Poikilotherm	Gopherus_evgoodei	86.3896	73221
MA1653.2	Moderately_Reduced	Promoter_G4	Poikilotherm	Gopherus_evgoodei	87.6489	56306
MA1564.2	Highly_Reduced	Promoter_G4	Poikilotherm	Gopherus_evgoodei	90.9825	32071
MA0146.3	Moderately_Enriched	Promoter_G4	Poikilotherm	Gopherus_evgoodei	82.1252	2635
MA1516.2	Moderately_Enriched	Promoter_G4	Poikilotherm	Gopherus_evgoodei	89.9599	8718
MA0821.2	Moderately_Enriched	Promoter_G4	Poikilotherm	Gopherus_evgoodei	82.7222	1080
MA1474.2	Highly_Enriched	Promoter_G4	Poikilotherm	Gopherus_evgoodei	78.9847	522
MA0526.5	Moderately_Reduced	Promoter_G4	Poikilotherm	Gopherus_evgoodei	67.1106	398
MA0620.4	Moderately_Reduced	Promoter_G4	Poikilotherm	Gopherus_evgoodei	61.1111	306
MA2340.1	Moderately_Enriched	Promoter_G4	Poikilotherm	Gopherus_evgoodei	71.6644	733
MA0831.3	Moderately_Reduced	Promoter_G4	Poikilotherm	Gopherus_evgoodei	62.4869	382
MA0857.1	Moderately_Enriched	Promoter_G4	Poikilotherm	Gopherus_evgoodei	62.4477	478
MA0111.1	Highly_Reduced	Promoter_G4	Poikilotherm	Gopherus_evgoodei	67.9325	1422
MA2580.1	Moderately_Enriched	Promoter_G4	Poikilotherm	Gopherus_evgoodei	56.6953	233
MA2524.1	Moderately_Enriched	Promoter_G4	Poikilotherm	Gopherus_evgoodei	66.4327	407
MA1533.2	Highly_Enriched	Promoter_G4	Poikilotherm	Gopherus_evgoodei	76.3012	1058
MA2489.1	Moderately_Enriched	Promoter_G4	Poikilotherm	Gopherus_evgoodei	39.1534	21
MA0646.2	Highly_Enriched	Promoter_G4	Poikilotherm	Gopherus_evgoodei	72.592	679
MA0685.2	Moderately_Reduced	Promoter_G4	Poikilotherm	Gopherus_evgoodei	92.6792	50142
MA0079.5	Moderately_Reduced	Promoter_G4	Poikilotherm	Gopherus_evgoodei	92.3103	54477
MA2582.1	Highly_Enriched	Promoter_G4	Poikilotherm	Gopherus_evgoodei	64.8372	430
MA1979.2	Highly_Enriched	Promoter_G4	Poikilotherm	Gopherus_evgoodei	67.8355	924
MA0478.2	Moderately_Enriched	Promoter_G4	Poikilotherm	Gopherus_evgoodei	58.7701	187
MA0814.3	Moderately_Enriched	Promoter_G4	Poikilotherm	Gopherus_evgoodei	87.2907	4978
MA0812.2	Moderately_Enriched	Promoter_G4	Poikilotherm	Gopherus_evgoodei	90.8264	5947
MA2593.1	Moderately_Enriched	Promoter_G4	Poikilotherm	Gopherus_evgoodei	11.1765	102
MA0781.2	Moderately_Reduced	Promoter_G4	Poikilotherm	Gopherus_evgoodei	74.0716	276
MA1559.2	Moderately_Enriched	Promoter_G4	Poikilotherm	Gopherus_evgoodei	68.861	957
MA0765.4	Highly_Reduced	Promoter_G4	Poikilotherm	Gopherus_evgoodei	67.5501	327
MA0764.4	Highly_Reduced	Promoter_G4	Poikilotherm	Gopherus_evgoodei	67.6536	349
MA0028.3	Highly_Reduced	Promoter_G4	Poikilotherm	Gopherus_evgoodei	67.3953	305
MA0640.3	Moderately_Enriched	Promoter_G4	Poikilotherm	Gopherus_evgoodei	60.8942	922
MA0519.2	Moderately_Enriched	Promoter_G4	Poikilotherm	Gopherus_evgoodei	53.4653	202
MA0837.3	Moderately_Reduced	Promoter_G4	Poikilotherm	Gopherus_evgoodei	45.7143	42
MA1585.2	Moderately_Enriched	Promoter_G4	Poikilotherm	Gopherus_evgoodei	57.0154	274
MA1513.2	Moderately_Enriched	Promoter_G4	Poikilotherm	Gopherus_evgoodei	98.2029	21597
MA2602.1	Moderately_Enriched	Promoter_G4	Poikilotherm	Gopherus_evgoodei	86.3578	3141
MA2588.1	Highly_Enriched	Promoter_G4	Poikilotherm	Gopherus_evgoodei	91.2124	3990
MA1099.3	Moderately_Enriched	Promoter_G4	Poikilotherm	Gopherus_evgoodei	86.5956	926
MA0632.3	Highly_Enriched	Promoter_G4	Poikilotherm	Gopherus_evgoodei	93.1197	1190
MA0131.3	Moderately_Enriched	Promoter_G4	Poikilotherm	Gopherus_evgoodei	84.2255	836
MA0745.3	Highly_Enriched	Promoter_G4	Poikilotherm	Gopherus_evgoodei	70.1517	1137
MA0469.4	Moderately_Reduced	Promoter_G4	Poikilotherm	Gopherus_evgoodei	58.1633	14
MA1998.2	Moderately_Enriched	Promoter_G4	Poikilotherm	Gopherus_evgoodei	58.1587	334
MA1645.2	Highly_Enriched	Promoter_G4	Poikilotherm	Gopherus_evgoodei	60.982	667
MA0807.1	Moderately_Enriched	Promoter_G4	Poikilotherm	Gopherus_evgoodei	59.1714	706
MA0801.1	Moderately_Enriched	Promoter_G4	Poikilotherm	Gopherus_evgoodei	58.8542	456
MA1580.1	Moderately_Reduced	Promoter_G4	Poikilotherm	Gopherus_evgoodei	44.1026	39
MA2597.1	Highly_Enriched	Promoter_G4	Poikilotherm	Gopherus_evgoodei	44.9653	216
MA0136.4	Moderately_Enriched	Promoter_G4	Poikilotherm	Gopherus_evgoodei	47.873	429
MA1547.2	Moderately_Enriched	Promoter_G4	Poikilotherm	Gopherus_evgoodei	42.0768	254
MA1125.2	Moderately_Enriched	Promoter_G4	Poikilotherm	Gopherus_evgoodei	3.67647	136
MA2102.1	Moderately_Reduced	Promoter_G4	Poikilotherm	Gopherus_evgoodei	37.5	18
MA1558.2	Highly_Enriched	Promoter_G4	Poikilotherm	Gopherus_evgoodei	67.6417	1011
MA1117.2	Highly_Reduced	Promoter_G4	Poikilotherm	Gopherus_evgoodei	57.1429	965
MA1523.2	Highly_Enriched	Promoter_G4	Poikilotherm	Gopherus_evgoodei	57.1429	366
MA0508.4	Highly_Enriched	Promoter_G4	Poikilotherm	Gopherus_evgoodei	42.8571	288
MA0712.3	Highly_Enriched	Promoter_G4	Poikilotherm	Gopherus_evgoodei	42.8571	215
MA1712.2	Highly_Enriched	Promoter_G4	Poikilotherm	Crocodylus_porosus	85.2337	7151
MA0073.2	Highly_Reduced	Promoter_G4	Poikilotherm	Crocodylus_porosus	72.8349	11223
MA1721.2	Moderately_Enriched	Promoter_G4	Poikilotherm	Crocodylus_porosus	85.8125	6692
MA0258.2	Highly_Enriched	Promoter_G4	Poikilotherm	Crocodylus_porosus	75.3706	949
MA0163.1	Highly_Reduced	Promoter_G4	Poikilotherm	Crocodylus_porosus	80.9601	13791
MA2688.1	Highly_Reduced	Promoter_G4	Poikilotherm	Crocodylus_porosus	73.1706	10075
MA1987.2	Highly_Reduced	Promoter_G4	Poikilotherm	Crocodylus_porosus	76.7757	9505
MA1714.2	Highly_Reduced	Promoter_G4	Poikilotherm	Crocodylus_porosus	65.7293	612
MA2528.1	Highly_Enriched	Promoter_G4	Poikilotherm	Crocodylus_porosus	74.2715	1347
MA2538.1	Moderately_Enriched	Promoter_G4	Poikilotherm	Crocodylus_porosus	92.1484	4204
MA2494.1	Moderately_Reduced	Promoter_G4	Poikilotherm	Crocodylus_porosus	74.4122	1999
MA0506.3	Highly_Enriched	Promoter_G4	Poikilotherm	Crocodylus_porosus	86.8643	2471
MA1531.2	Moderately_Reduced	Promoter_G4	Poikilotherm	Crocodylus_porosus	74.4952	1323
MA1528.2	Highly_Enriched	Promoter_G4	Poikilotherm	Crocodylus_porosus	79.1197	1368
MA2545.1	Highly_Enriched	Promoter_G4	Poikilotherm	Crocodylus_porosus	68.3289	559
MA1532.2	Highly_Reduced	Promoter_G4	Poikilotherm	Crocodylus_porosus	71.9803	813
MA2553.1	Moderately_Enriched	Promoter_G4	Poikilotherm	Crocodylus_porosus	83.4427	1506
MA1654.2	Moderately_Reduced	Promoter_G4	Poikilotherm	Crocodylus_porosus	71.385	1202
MA0081.3	Highly_Reduced	Promoter_G4	Poikilotherm	Crocodylus_porosus	64.4585	1383
MA2531.1	Moderately_Reduced	Promoter_G4	Poikilotherm	Crocodylus_porosus	67.5505	2836
MA0736.1	Moderately_Reduced	Promoter_G4	Poikilotherm	Crocodylus_porosus	81.9439	5009
MA0741.1	Highly_Reduced	Promoter_G4	Poikilotherm	Crocodylus_porosus	87.7696	19763
MA2519.1	Highly_Reduced	Promoter_G4	Poikilotherm	Crocodylus_porosus	73.0746	959
MA0080.7	Highly_Reduced	Promoter_G4	Poikilotherm	Crocodylus_porosus	64.0996	1721
MA0747.2	Highly_Reduced	Promoter_G4	Poikilotherm	Crocodylus_porosus	86.2498	18608
MA0145.2	Highly_Enriched	Promoter_G4	Poikilotherm	Crocodylus_porosus	80.3424	1815
MA2534.1	Moderately_Reduced	Promoter_G4	Poikilotherm	Crocodylus_porosus	70.9867	726
MA2573.1	Highly_Enriched	Promoter_G4	Poikilotherm	Crocodylus_porosus	82.749	1004
MA0857.1	Moderately_Enriched	Promoter_G4	Poikilotherm	Crocodylus_porosus	64.6393	298
MA1114.2	Moderately_Enriched	Promoter_G4	Poikilotherm	Crocodylus_porosus	64.0919	439
MA1553.2	Moderately_Enriched	Promoter_G4	Poikilotherm	Crocodylus_porosus	68.8444	219
MA0472.2	Moderately_Enriched	Promoter_G4	Poikilotherm	Crocodylus_porosus	86.0855	1732
MA0781.2	Moderately_Reduced	Promoter_G4	Poikilotherm	Crocodylus_porosus	76.6688	191
MA2539.1	Moderately_Enriched	Promoter_G4	Poikilotherm	Crocodylus_porosus	97.6725	9190
MA2328.1	Moderately_Enriched	Promoter_G4	Poikilotherm	Crocodylus_porosus	93.6047	13829
MA2493.1	Moderately_Enriched	Promoter_G4	Poikilotherm	Crocodylus_porosus	71.7072	497
MA2524.1	Moderately_Enriched	Promoter_G4	Poikilotherm	Crocodylus_porosus	64.4297	215
MA0753.3	Highly_Reduced	Promoter_G4	Poikilotherm	Crocodylus_porosus	88.37	43490
MA1713.2	Moderately_Enriched	Promoter_G4	Poikilotherm	Crocodylus_porosus	88.0065	4926
MA1630.3	Moderately_Reduced	Promoter_G4	Poikilotherm	Crocodylus_porosus	86.3921	42476
MA1653.2	Moderately_Reduced	Promoter_G4	Poikilotherm	Crocodylus_porosus	87.5548	33188
MA1564.2	Highly_Reduced	Promoter_G4	Poikilotherm	Crocodylus_porosus	90.7843	17991
MA0728.1	Highly_Enriched	Promoter_G4	Poikilotherm	Crocodylus_porosus	64.1338	279
MA0146.3	Moderately_Enriched	Promoter_G4	Poikilotherm	Crocodylus_porosus	81.5421	1926
MA1516.2	Moderately_Enriched	Promoter_G4	Poikilotherm	Crocodylus_porosus	91.1842	5641
MA0821.2	Moderately_Enriched	Promoter_G4	Poikilotherm	Crocodylus_porosus	81.0271	1071
MA1474.2	Highly_Enriched	Promoter_G4	Poikilotherm	Crocodylus_porosus	75.6863	357
MA0526.5	Moderately_Reduced	Promoter_G4	Poikilotherm	Crocodylus_porosus	68.7838	444
MA0620.4	Moderately_Reduced	Promoter_G4	Poikilotherm	Crocodylus_porosus	65.4327	416
MA0646.2	Highly_Enriched	Promoter_G4	Poikilotherm	Crocodylus_porosus	73.5772	615
MA2340.1	Moderately_Enriched	Promoter_G4	Poikilotherm	Crocodylus_porosus	70.5501	509
MA0831.3	Moderately_Reduced	Promoter_G4	Poikilotherm	Crocodylus_porosus	66.6456	474
MA2582.1	Highly_Enriched	Promoter_G4	Poikilotherm	Crocodylus_porosus	63.7204	422
MA0111.1	Highly_Reduced	Promoter_G4	Poikilotherm	Crocodylus_porosus	67.7478	754
MA0729.1	Highly_Enriched	Promoter_G4	Poikilotherm	Crocodylus_porosus	64.3251	242
MA0685.2	Moderately_Reduced	Promoter_G4	Poikilotherm	Crocodylus_porosus	92.79	29422
MA0079.5	Moderately_Reduced	Promoter_G4	Poikilotherm	Crocodylus_porosus	92.4851	31583
MA1979.2	Highly_Enriched	Promoter_G4	Poikilotherm	Crocodylus_porosus	68.6626	658
MA0478.2	Moderately_Enriched	Promoter_G4	Poikilotherm	Crocodylus_porosus	57.9279	111
MA2580.1	Moderately_Enriched	Promoter_G4	Poikilotherm	Crocodylus_porosus	60	117
MA1602.2	Moderately_Reduced	Promoter_G4	Poikilotherm	Crocodylus_porosus	65.7097	57
MA2489.1	Moderately_Enriched	Promoter_G4	Poikilotherm	Crocodylus_porosus	28.2506	47
MA1533.2	Highly_Enriched	Promoter_G4	Poikilotherm	Crocodylus_porosus	76.1922	555
MA0814.3	Moderately_Enriched	Promoter_G4	Poikilotherm	Crocodylus_porosus	87.9989	3246
MA0812.2	Moderately_Enriched	Promoter_G4	Poikilotherm	Crocodylus_porosus	91.1316	4122
MA2593.1	Moderately_Enriched	Promoter_G4	Poikilotherm	Crocodylus_porosus	8.74419	215
MA0765.4	Highly_Reduced	Promoter_G4	Poikilotherm	Crocodylus_porosus	68.3232	275
MA0764.4	Highly_Reduced	Promoter_G4	Poikilotherm	Crocodylus_porosus	68.2963	300
MA0028.3	Highly_Reduced	Promoter_G4	Poikilotherm	Crocodylus_porosus	67.8735	267
MA0640.3	Moderately_Enriched	Promoter_G4	Poikilotherm	Crocodylus_porosus	60.9162	684
MA0519.2	Moderately_Enriched	Promoter_G4	Poikilotherm	Crocodylus_porosus	51.4368	116
MA1559.2	Moderately_Enriched	Promoter_G4	Poikilotherm	Crocodylus_porosus	70.0865	835
MA1513.2	Moderately_Enriched	Promoter_G4	Poikilotherm	Crocodylus_porosus	98.2912	14557
MA2602.1	Moderately_Enriched	Promoter_G4	Poikilotherm	Crocodylus_porosus	87.2295	1987
MA2588.1	Highly_Enriched	Promoter_G4	Poikilotherm	Crocodylus_porosus	92.2646	2676
MA1099.3	Moderately_Enriched	Promoter_G4	Poikilotherm	Crocodylus_porosus	82.8674	769
MA0632.3	Highly_Enriched	Promoter_G4	Poikilotherm	Crocodylus_porosus	92.0413	812
MA0131.3	Moderately_Enriched	Promoter_G4	Poikilotherm	Crocodylus_porosus	83.9982	564
MA0745.3	Highly_Enriched	Promoter_G4	Poikilotherm	Crocodylus_porosus	70.785	949
MA0837.3	Moderately_Reduced	Promoter_G4	Poikilotherm	Crocodylus_porosus	45.5556	9
MA1998.2	Moderately_Enriched	Promoter_G4	Poikilotherm	Crocodylus_porosus	56.9792	120
MA1645.2	Highly_Enriched	Promoter_G4	Poikilotherm	Crocodylus_porosus	60.3303	386
MA0807.1	Moderately_Enriched	Promoter_G4	Poikilotherm	Crocodylus_porosus	59.3137	408
MA0801.1	Moderately_Enriched	Promoter_G4	Poikilotherm	Crocodylus_porosus	58.9686	223
MA1585.2	Moderately_Enriched	Promoter_G4	Poikilotherm	Crocodylus_porosus	58.5391	108
MA2597.1	Highly_Enriched	Promoter_G4	Poikilotherm	Crocodylus_porosus	44.7917	84
MA0136.4	Moderately_Enriched	Promoter_G4	Poikilotherm	Crocodylus_porosus	47.5385	325
MA1547.2	Moderately_Enriched	Promoter_G4	Poikilotherm	Crocodylus_porosus	41.6667	96
MA0469.4	Moderately_Reduced	Promoter_G4	Poikilotherm	Crocodylus_porosus	57.8571	20
MA1125.2	Moderately_Enriched	Promoter_G4	Poikilotherm	Crocodylus_porosus	3.63248	234
MA2102.1	Moderately_Reduced	Promoter_G4	Poikilotherm	Crocodylus_porosus	37.5	2
MA1558.2	Highly_Enriched	Promoter_G4	Poikilotherm	Crocodylus_porosus	68.6188	905
MA1580.1	Moderately_Reduced	Promoter_G4	Poikilotherm	Crocodylus_porosus	45	8
MA1117.2	Highly_Reduced	Promoter_G4	Poikilotherm	Crocodylus_porosus	57.1429	463
MA1523.2	Highly_Enriched	Promoter_G4	Poikilotherm	Crocodylus_porosus	57.1429	213
MA0508.4	Highly_Enriched	Promoter_G4	Poikilotherm	Crocodylus_porosus	42.8571	190
MA0712.3	Highly_Enriched	Promoter_G4	Poikilotherm	Crocodylus_porosus	42.8571	88
MA0073.2	Highly_Reduced	Promoter_G4	Poikilotherm	Pelusios_castaneus	75.9033	18120
MA1712.2	Highly_Enriched	Promoter_G4	Poikilotherm	Pelusios_castaneus	84.1764	8584
MA0163.1	Highly_Reduced	Promoter_G4	Poikilotherm	Pelusios_castaneus	81.7028	24204
MA2688.1	Highly_Reduced	Promoter_G4	Poikilotherm	Pelusios_castaneus	75.438	15054
MA0736.1	Moderately_Reduced	Promoter_G4	Poikilotherm	Pelusios_castaneus	81.7641	7477
MA1721.2	Moderately_Enriched	Promoter_G4	Poikilotherm	Pelusios_castaneus	85.9853	8354
MA1987.2	Highly_Reduced	Promoter_G4	Poikilotherm	Pelusios_castaneus	78.012	15444
MA2494.1	Moderately_Reduced	Promoter_G4	Poikilotherm	Pelusios_castaneus	75.1456	3434
MA2531.1	Moderately_Reduced	Promoter_G4	Poikilotherm	Pelusios_castaneus	67.089	4183
MA1528.2	Highly_Enriched	Promoter_G4	Poikilotherm	Pelusios_castaneus	79.3899	2112
MA2538.1	Moderately_Enriched	Promoter_G4	Poikilotherm	Pelusios_castaneus	91.9241	5374
MA2553.1	Moderately_Enriched	Promoter_G4	Poikilotherm	Pelusios_castaneus	82.9572	1947
MA0506.3	Highly_Enriched	Promoter_G4	Poikilotherm	Pelusios_castaneus	87.0036	2384
MA1654.2	Moderately_Reduced	Promoter_G4	Poikilotherm	Pelusios_castaneus	71.346	2133
MA0145.2	Highly_Enriched	Promoter_G4	Poikilotherm	Pelusios_castaneus	79.7282	2507
MA2528.1	Highly_Enriched	Promoter_G4	Poikilotherm	Pelusios_castaneus	72.5659	1954
MA1714.2	Highly_Reduced	Promoter_G4	Poikilotherm	Pelusios_castaneus	64.9502	972
MA0081.3	Highly_Reduced	Promoter_G4	Poikilotherm	Pelusios_castaneus	63.9171	1811
MA1531.2	Moderately_Reduced	Promoter_G4	Poikilotherm	Pelusios_castaneus	72.4465	2084
MA2545.1	Highly_Enriched	Promoter_G4	Poikilotherm	Pelusios_castaneus	68.4495	832
MA0741.1	Highly_Reduced	Promoter_G4	Poikilotherm	Pelusios_castaneus	89.5604	35247
MA2519.1	Highly_Reduced	Promoter_G4	Poikilotherm	Pelusios_castaneus	72.7225	1507
MA0747.2	Highly_Reduced	Promoter_G4	Poikilotherm	Pelusios_castaneus	88.4538	32450
MA0080.7	Highly_Reduced	Promoter_G4	Poikilotherm	Pelusios_castaneus	63.1866	2147
MA0472.2	Moderately_Enriched	Promoter_G4	Poikilotherm	Pelusios_castaneus	85.9293	2428
MA0728.1	Highly_Enriched	Promoter_G4	Poikilotherm	Pelusios_castaneus	61.2183	394
MA2534.1	Moderately_Reduced	Promoter_G4	Poikilotherm	Pelusios_castaneus	69.7219	1461
MA0258.2	Highly_Enriched	Promoter_G4	Poikilotherm	Pelusios_castaneus	74.3052	1125
MA0111.1	Highly_Reduced	Promoter_G4	Poikilotherm	Pelusios_castaneus	66.8232	987
MA1532.2	Highly_Reduced	Promoter_G4	Poikilotherm	Pelusios_castaneus	69.932	1372
MA2539.1	Moderately_Enriched	Promoter_G4	Poikilotherm	Pelusios_castaneus	97.4531	13899
MA2328.1	Moderately_Enriched	Promoter_G4	Poikilotherm	Pelusios_castaneus	93.0126	20597
MA2493.1	Moderately_Enriched	Promoter_G4	Poikilotherm	Pelusios_castaneus	70.8386	665
MA0857.1	Moderately_Enriched	Promoter_G4	Poikilotherm	Pelusios_castaneus	63.7019	442
MA1114.2	Moderately_Enriched	Promoter_G4	Poikilotherm	Pelusios_castaneus	63.7558	685
MA0753.3	Highly_Reduced	Promoter_G4	Poikilotherm	Pelusios_castaneus	89.5687	68282
MA1713.2	Moderately_Enriched	Promoter_G4	Poikilotherm	Pelusios_castaneus	87.4305	7414
MA1630.3	Moderately_Reduced	Promoter_G4	Poikilotherm	Pelusios_castaneus	87.6757	65761
MA1653.2	Moderately_Reduced	Promoter_G4	Poikilotherm	Pelusios_castaneus	88.9958	53586
MA1564.2	Highly_Reduced	Promoter_G4	Poikilotherm	Pelusios_castaneus	92.4617	33664
MA1516.2	Moderately_Enriched	Promoter_G4	Poikilotherm	Pelusios_castaneus	90.9399	8458
MA0821.2	Moderately_Enriched	Promoter_G4	Poikilotherm	Pelusios_castaneus	81.0175	1140
MA2573.1	Highly_Enriched	Promoter_G4	Poikilotherm	Pelusios_castaneus	82.2683	1593
MA2524.1	Moderately_Enriched	Promoter_G4	Poikilotherm	Pelusios_castaneus	65.135	314
MA1553.2	Moderately_Enriched	Promoter_G4	Poikilotherm	Pelusios_castaneus	69.6703	280
MA0781.2	Moderately_Reduced	Promoter_G4	Poikilotherm	Pelusios_castaneus	76.3093	253
MA0526.5	Moderately_Reduced	Promoter_G4	Poikilotherm	Pelusios_castaneus	66.1279	563
MA0620.4	Moderately_Reduced	Promoter_G4	Poikilotherm	Pelusios_castaneus	62.3474	426
MA2340.1	Moderately_Enriched	Promoter_G4	Poikilotherm	Pelusios_castaneus	70.3431	787
MA0831.3	Moderately_Reduced	Promoter_G4	Poikilotherm	Pelusios_castaneus	63.58	500
MA2580.1	Moderately_Enriched	Promoter_G4	Poikilotherm	Pelusios_castaneus	58.1212	165
MA1979.2	Highly_Enriched	Promoter_G4	Poikilotherm	Pelusios_castaneus	67.5805	1025
MA0146.3	Moderately_Enriched	Promoter_G4	Poikilotherm	Pelusios_castaneus	81.9732	2316
MA1533.2	Highly_Enriched	Promoter_G4	Poikilotherm	Pelusios_castaneus	75.3	739
MA0729.1	Highly_Enriched	Promoter_G4	Poikilotherm	Pelusios_castaneus	63.7494	438
MA0646.2	Highly_Enriched	Promoter_G4	Poikilotherm	Pelusios_castaneus	73.2075	583
MA1474.2	Highly_Enriched	Promoter_G4	Poikilotherm	Pelusios_castaneus	78.491	444
MA0685.2	Moderately_Reduced	Promoter_G4	Poikilotherm	Pelusios_castaneus	93.6756	50380
MA0079.5	Moderately_Reduced	Promoter_G4	Poikilotherm	Pelusios_castaneus	93.3001	53853
MA2582.1	Highly_Enriched	Promoter_G4	Poikilotherm	Pelusios_castaneus	64.3301	418
MA0478.2	Moderately_Enriched	Promoter_G4	Poikilotherm	Pelusios_castaneus	59.4907	216
MA0814.3	Moderately_Enriched	Promoter_G4	Poikilotherm	Pelusios_castaneus	87.9356	3718
MA0812.2	Moderately_Enriched	Promoter_G4	Poikilotherm	Pelusios_castaneus	91.0692	4714
MA2593.1	Moderately_Enriched	Promoter_G4	Poikilotherm	Pelusios_castaneus	8.8024	167
MA1602.2	Moderately_Reduced	Promoter_G4	Poikilotherm	Pelusios_castaneus	59.7403	91
MA0837.3	Moderately_Reduced	Promoter_G4	Poikilotherm	Pelusios_castaneus	53	20
MA1559.2	Moderately_Enriched	Promoter_G4	Poikilotherm	Pelusios_castaneus	69.8157	1055
MA0765.4	Highly_Reduced	Promoter_G4	Poikilotherm	Pelusios_castaneus	67.6428	387
MA0764.4	Highly_Reduced	Promoter_G4	Poikilotherm	Pelusios_castaneus	67.9043	404
MA0028.3	Highly_Reduced	Promoter_G4	Poikilotherm	Pelusios_castaneus	67.3555	371
MA0640.3	Moderately_Enriched	Promoter_G4	Poikilotherm	Pelusios_castaneus	60.5097	933
MA0469.4	Moderately_Reduced	Promoter_G4	Poikilotherm	Pelusios_castaneus	50.5831	49
MA0519.2	Moderately_Enriched	Promoter_G4	Poikilotherm	Pelusios_castaneus	53.1347	179
MA2489.1	Moderately_Enriched	Promoter_G4	Poikilotherm	Pelusios_castaneus	35.5297	43
MA1513.2	Moderately_Enriched	Promoter_G4	Poikilotherm	Pelusios_castaneus	98.1354	21606
MA1580.1	Moderately_Reduced	Promoter_G4	Poikilotherm	Pelusios_castaneus	41.875	32
MA2602.1	Moderately_Enriched	Promoter_G4	Poikilotherm	Pelusios_castaneus	86.7349	2614
MA2588.1	Highly_Enriched	Promoter_G4	Poikilotherm	Pelusios_castaneus	91.6433	3210
MA1099.3	Moderately_Enriched	Promoter_G4	Poikilotherm	Pelusios_castaneus	86.1616	1046
MA0632.3	Highly_Enriched	Promoter_G4	Poikilotherm	Pelusios_castaneus	94.0419	1456
MA0131.3	Moderately_Enriched	Promoter_G4	Poikilotherm	Pelusios_castaneus	83.9542	698
MA0745.3	Highly_Enriched	Promoter_G4	Poikilotherm	Pelusios_castaneus	70.2344	1141
MA1585.2	Moderately_Enriched	Promoter_G4	Poikilotherm	Pelusios_castaneus	59.7412	146
MA1998.2	Moderately_Enriched	Promoter_G4	Poikilotherm	Pelusios_castaneus	57.5	245
MA1645.2	Highly_Enriched	Promoter_G4	Poikilotherm	Pelusios_castaneus	60.1049	715
MA0807.1	Moderately_Enriched	Promoter_G4	Poikilotherm	Pelusios_castaneus	59.7093	645
MA0801.1	Moderately_Enriched	Promoter_G4	Poikilotherm	Pelusios_castaneus	58.7973	449
MA2597.1	Highly_Enriched	Promoter_G4	Poikilotherm	Pelusios_castaneus	44.8103	224
MA0136.4	Moderately_Enriched	Promoter_G4	Poikilotherm	Pelusios_castaneus	47.9312	429
MA1547.2	Moderately_Enriched	Promoter_G4	Poikilotherm	Pelusios_castaneus	42.8404	213
MA2102.1	Moderately_Reduced	Promoter_G4	Poikilotherm	Pelusios_castaneus	34.375	8
MA1125.2	Moderately_Enriched	Promoter_G4	Poikilotherm	Pelusios_castaneus	2.31742	178
MA1558.2	Highly_Enriched	Promoter_G4	Poikilotherm	Pelusios_castaneus	67.8254	1126
MA1117.2	Highly_Reduced	Promoter_G4	Poikilotherm	Pelusios_castaneus	57.1429	911
MA1523.2	Highly_Enriched	Promoter_G4	Poikilotherm	Pelusios_castaneus	57.1429	308
MA0508.4	Highly_Enriched	Promoter_G4	Poikilotherm	Pelusios_castaneus	42.8571	312
MA0712.3	Highly_Enriched	Promoter_G4	Poikilotherm	Pelusios_castaneus	42.8571	229
MA1712.2	Highly_Enriched	Promoter_G4	Poikilotherm	Pelodiscus_sinensis	82.1509	4222
MA0073.2	Highly_Reduced	Promoter_G4	Poikilotherm	Pelodiscus_sinensis	77.2459	11971
MA2528.1	Highly_Enriched	Promoter_G4	Poikilotherm	Pelodiscus_sinensis	72.1658	1021
MA0163.1	Highly_Reduced	Promoter_G4	Poikilotherm	Pelodiscus_sinensis	83.0834	15272
MA2688.1	Highly_Reduced	Promoter_G4	Poikilotherm	Pelodiscus_sinensis	76.2797	12293
MA1987.2	Highly_Reduced	Promoter_G4	Poikilotherm	Pelodiscus_sinensis	78.7999	11167
MA1721.2	Moderately_Enriched	Promoter_G4	Poikilotherm	Pelodiscus_sinensis	83.4209	3208
MA2538.1	Moderately_Enriched	Promoter_G4	Poikilotherm	Pelodiscus_sinensis	90.9446	1835
MA2494.1	Moderately_Reduced	Promoter_G4	Poikilotherm	Pelodiscus_sinensis	73.1731	2131
MA0506.3	Highly_Enriched	Promoter_G4	Poikilotherm	Pelodiscus_sinensis	83.4293	955
MA2531.1	Moderately_Reduced	Promoter_G4	Poikilotherm	Pelodiscus_sinensis	67.0171	3386
MA2519.1	Highly_Reduced	Promoter_G4	Poikilotherm	Pelodiscus_sinensis	70.7362	846
MA2545.1	Highly_Enriched	Promoter_G4	Poikilotherm	Pelodiscus_sinensis	67.535	547
MA1654.2	Moderately_Reduced	Promoter_G4	Poikilotherm	Pelodiscus_sinensis	70.959	1298
MA1714.2	Highly_Reduced	Promoter_G4	Poikilotherm	Pelodiscus_sinensis	64.2676	683
MA2553.1	Moderately_Enriched	Promoter_G4	Poikilotherm	Pelodiscus_sinensis	81.2636	810
MA1531.2	Moderately_Reduced	Promoter_G4	Poikilotherm	Pelodiscus_sinensis	74.0783	1240
MA0741.1	Highly_Reduced	Promoter_G4	Poikilotherm	Pelodiscus_sinensis	89.7713	21877
MA0747.2	Highly_Reduced	Promoter_G4	Poikilotherm	Pelodiscus_sinensis	88.864	20493
MA0145.2	Highly_Enriched	Promoter_G4	Poikilotherm	Pelodiscus_sinensis	75.2867	1059
MA0080.7	Highly_Reduced	Promoter_G4	Poikilotherm	Pelodiscus_sinensis	63.8023	1648
MA0857.1	Moderately_Enriched	Promoter_G4	Poikilotherm	Pelodiscus_sinensis	61.5057	264
MA2534.1	Moderately_Reduced	Promoter_G4	Poikilotherm	Pelodiscus_sinensis	69.9371	795
MA1532.2	Highly_Reduced	Promoter_G4	Poikilotherm	Pelodiscus_sinensis	70.8521	798
MA0258.2	Highly_Enriched	Promoter_G4	Poikilotherm	Pelodiscus_sinensis	72.8748	756
MA1528.2	Highly_Enriched	Promoter_G4	Poikilotherm	Pelodiscus_sinensis	77.576	1062
MA0472.2	Moderately_Enriched	Promoter_G4	Poikilotherm	Pelodiscus_sinensis	82.7316	1045
MA0736.1	Moderately_Reduced	Promoter_G4	Poikilotherm	Pelodiscus_sinensis	81.2601	4163
MA0081.3	Highly_Reduced	Promoter_G4	Poikilotherm	Pelodiscus_sinensis	64.1877	1385
MA2539.1	Moderately_Enriched	Promoter_G4	Poikilotherm	Pelodiscus_sinensis	96.8329	3770
MA2328.1	Moderately_Enriched	Promoter_G4	Poikilotherm	Pelodiscus_sinensis	92.4915	7345
MA1602.2	Moderately_Reduced	Promoter_G4	Poikilotherm	Pelodiscus_sinensis	57.9798	45
MA2573.1	Highly_Enriched	Promoter_G4	Poikilotherm	Pelodiscus_sinensis	78.3278	602
MA0753.3	Highly_Reduced	Promoter_G4	Poikilotherm	Pelodiscus_sinensis	89.6205	46007
MA1713.2	Moderately_Enriched	Promoter_G4	Poikilotherm	Pelodiscus_sinensis	86.0076	3176
MA1630.3	Moderately_Reduced	Promoter_G4	Poikilotherm	Pelodiscus_sinensis	87.1103	40606
MA1653.2	Moderately_Reduced	Promoter_G4	Poikilotherm	Pelodiscus_sinensis	88.2335	32544
MA1564.2	Highly_Reduced	Promoter_G4	Poikilotherm	Pelodiscus_sinensis	92.8558	20215
MA2524.1	Moderately_Enriched	Promoter_G4	Poikilotherm	Pelodiscus_sinensis	65.1835	244
MA0146.3	Moderately_Enriched	Promoter_G4	Poikilotherm	Pelodiscus_sinensis	80.0412	1213
MA1516.2	Moderately_Enriched	Promoter_G4	Poikilotherm	Pelodiscus_sinensis	88.4131	2842
MA0821.2	Moderately_Enriched	Promoter_G4	Poikilotherm	Pelodiscus_sinensis	82.6442	416
MA1474.2	Highly_Enriched	Promoter_G4	Poikilotherm	Pelodiscus_sinensis	77.875	240
MA1114.2	Moderately_Enriched	Promoter_G4	Poikilotherm	Pelodiscus_sinensis	64.9081	386
MA2340.1	Moderately_Enriched	Promoter_G4	Poikilotherm	Pelodiscus_sinensis	71.0644	357
MA0111.1	Highly_Reduced	Promoter_G4	Poikilotherm	Pelodiscus_sinensis	67.4084	670
MA0729.1	Highly_Enriched	Promoter_G4	Poikilotherm	Pelodiscus_sinensis	65.7298	255
MA2582.1	Highly_Enriched	Promoter_G4	Poikilotherm	Pelodiscus_sinensis	62.9046	241
MA1979.2	Highly_Enriched	Promoter_G4	Poikilotherm	Pelodiscus_sinensis	67.6119	536
MA0728.1	Highly_Enriched	Promoter_G4	Poikilotherm	Pelodiscus_sinensis	60.4426	241
MA0646.2	Highly_Enriched	Promoter_G4	Poikilotherm	Pelodiscus_sinensis	71.8895	344
MA1553.2	Moderately_Enriched	Promoter_G4	Poikilotherm	Pelodiscus_sinensis	65.6736	173
MA0685.2	Moderately_Reduced	Promoter_G4	Poikilotherm	Pelodiscus_sinensis	92.9133	28769
MA0079.5	Moderately_Reduced	Promoter_G4	Poikilotherm	Pelodiscus_sinensis	92.4522	30805
MA0478.2	Moderately_Enriched	Promoter_G4	Poikilotherm	Pelodiscus_sinensis	59.2248	129
MA2580.1	Moderately_Enriched	Promoter_G4	Poikilotherm	Pelodiscus_sinensis	57.5735	136
MA1533.2	Highly_Enriched	Promoter_G4	Poikilotherm	Pelodiscus_sinensis	73.4917	421
MA2493.1	Moderately_Enriched	Promoter_G4	Poikilotherm	Pelodiscus_sinensis	70.7924	399
MA0781.2	Moderately_Reduced	Promoter_G4	Poikilotherm	Pelodiscus_sinensis	72.2739	94
MA0814.3	Moderately_Enriched	Promoter_G4	Poikilotherm	Pelodiscus_sinensis	85.7172	2200
MA0812.2	Moderately_Enriched	Promoter_G4	Poikilotherm	Pelodiscus_sinensis	89.0267	2499
MA2593.1	Moderately_Enriched	Promoter_G4	Poikilotherm	Pelodiscus_sinensis	11.122	205
MA0526.5	Moderately_Reduced	Promoter_G4	Poikilotherm	Pelodiscus_sinensis	67.6087	138
MA0620.4	Moderately_Reduced	Promoter_G4	Poikilotherm	Pelodiscus_sinensis	61.5	120
MA0831.3	Moderately_Reduced	Promoter_G4	Poikilotherm	Pelodiscus_sinensis	64.6923	130
MA1559.2	Moderately_Enriched	Promoter_G4	Poikilotherm	Pelodiscus_sinensis	69.9688	498
MA0765.4	Highly_Reduced	Promoter_G4	Poikilotherm	Pelodiscus_sinensis	67.2344	137
MA0764.4	Highly_Reduced	Promoter_G4	Poikilotherm	Pelodiscus_sinensis	67.1233	146
MA0028.3	Highly_Reduced	Promoter_G4	Poikilotherm	Pelodiscus_sinensis	66.6667	125
MA0640.3	Moderately_Enriched	Promoter_G4	Poikilotherm	Pelodiscus_sinensis	60.378	629
MA0519.2	Moderately_Enriched	Promoter_G4	Poikilotherm	Pelodiscus_sinensis	51.9084	131
MA2489.1	Moderately_Enriched	Promoter_G4	Poikilotherm	Pelodiscus_sinensis	42.4074	30
MA0469.4	Moderately_Reduced	Promoter_G4	Poikilotherm	Pelodiscus_sinensis	56.015	19
MA1513.2	Moderately_Enriched	Promoter_G4	Poikilotherm	Pelodiscus_sinensis	97.8777	7480
MA2602.1	Moderately_Enriched	Promoter_G4	Poikilotherm	Pelodiscus_sinensis	85.7114	1251
MA2588.1	Highly_Enriched	Promoter_G4	Poikilotherm	Pelodiscus_sinensis	91.0874	1338
MA1099.3	Moderately_Enriched	Promoter_G4	Poikilotherm	Pelodiscus_sinensis	88.4665	388
MA1580.1	Moderately_Reduced	Promoter_G4	Poikilotherm	Pelodiscus_sinensis	45.3846	13
MA0632.3	Highly_Enriched	Promoter_G4	Poikilotherm	Pelodiscus_sinensis	92.9167	390
MA0131.3	Moderately_Enriched	Promoter_G4	Poikilotherm	Pelodiscus_sinensis	83.5705	369
MA0745.3	Highly_Enriched	Promoter_G4	Poikilotherm	Pelodiscus_sinensis	70.8622	577
MA1998.2	Moderately_Enriched	Promoter_G4	Poikilotherm	Pelodiscus_sinensis	58.6397	136
MA1645.2	Highly_Enriched	Promoter_G4	Poikilotherm	Pelodiscus_sinensis	60.2061	376
MA0807.1	Moderately_Enriched	Promoter_G4	Poikilotherm	Pelodiscus_sinensis	58.7432	366
MA0801.1	Moderately_Enriched	Promoter_G4	Poikilotherm	Pelodiscus_sinensis	59.2337	199
MA1585.2	Moderately_Enriched	Promoter_G4	Poikilotherm	Pelodiscus_sinensis	62.735	195
MA0837.3	Moderately_Reduced	Promoter_G4	Poikilotherm	Pelodiscus_sinensis	52.7273	22
MA2597.1	Highly_Enriched	Promoter_G4	Poikilotherm	Pelodiscus_sinensis	45.4457	129
MA0136.4	Moderately_Enriched	Promoter_G4	Poikilotherm	Pelodiscus_sinensis	47.5564	399
MA1547.2	Moderately_Enriched	Promoter_G4	Poikilotherm	Pelodiscus_sinensis	44.6573	124
MA1125.2	Moderately_Enriched	Promoter_G4	Poikilotherm	Pelodiscus_sinensis	3.75	260
MA2102.1	Moderately_Reduced	Promoter_G4	Poikilotherm	Pelodiscus_sinensis	37.5	4
MA1558.2	Highly_Enriched	Promoter_G4	Poikilotherm	Pelodiscus_sinensis	68.3598	540
MA1117.2	Highly_Reduced	Promoter_G4	Poikilotherm	Pelodiscus_sinensis	57.1429	598
MA1523.2	Highly_Enriched	Promoter_G4	Poikilotherm	Pelodiscus_sinensis	57.1429	197
MA0508.4	Highly_Enriched	Promoter_G4	Poikilotherm	Pelodiscus_sinensis	42.8571	237
MA0712.3	Highly_Enriched	Promoter_G4	Poikilotherm	Pelodiscus_sinensis	42.8571	138
MA0073.2	Highly_Reduced	Promoter_G4	Poikilotherm	Chelydra_serpentina	78.6958	28118
MA1712.2	Highly_Enriched	Promoter_G4	Poikilotherm	Chelydra_serpentina	84.9256	11334
MA1654.2	Moderately_Reduced	Promoter_G4	Poikilotherm	Chelydra_serpentina	73.0692	2232
MA2688.1	Highly_Reduced	Promoter_G4	Poikilotherm	Chelydra_serpentina	78.9148	20563
MA2528.1	Highly_Enriched	Promoter_G4	Poikilotherm	Chelydra_serpentina	74.5867	2132
MA1987.2	Highly_Reduced	Promoter_G4	Poikilotherm	Chelydra_serpentina	81.2376	21935
MA1721.2	Moderately_Enriched	Promoter_G4	Poikilotherm	Chelydra_serpentina	86.8484	10505
MA0163.1	Highly_Reduced	Promoter_G4	Poikilotherm	Chelydra_serpentina	84.8078	32134
MA2494.1	Moderately_Reduced	Promoter_G4	Poikilotherm	Chelydra_serpentina	76.7262	4283
MA2531.1	Moderately_Reduced	Promoter_G4	Poikilotherm	Chelydra_serpentina	68.2944	4833
MA1531.2	Moderately_Reduced	Promoter_G4	Poikilotherm	Chelydra_serpentina	73.6696	2212
MA2538.1	Moderately_Enriched	Promoter_G4	Poikilotherm	Chelydra_serpentina	92.495	7153
MA0506.3	Highly_Enriched	Promoter_G4	Poikilotherm	Chelydra_serpentina	86.7902	2806
MA2519.1	Highly_Reduced	Promoter_G4	Poikilotherm	Chelydra_serpentina	73.1906	1658
MA1532.2	Highly_Reduced	Promoter_G4	Poikilotherm	Chelydra_serpentina	69.8817	1381
MA0736.1	Moderately_Reduced	Promoter_G4	Poikilotherm	Chelydra_serpentina	83.7865	9856
MA2545.1	Highly_Enriched	Promoter_G4	Poikilotherm	Chelydra_serpentina	68.9465	912
MA0080.7	Highly_Reduced	Promoter_G4	Poikilotherm	Chelydra_serpentina	63.9846	2283
MA1714.2	Highly_Reduced	Promoter_G4	Poikilotherm	Chelydra_serpentina	59.9813	1463
MA0741.1	Highly_Reduced	Promoter_G4	Poikilotherm	Chelydra_serpentina	90.8607	51518
MA2524.1	Moderately_Enriched	Promoter_G4	Poikilotherm	Chelydra_serpentina	65.923	397
MA0258.2	Highly_Enriched	Promoter_G4	Poikilotherm	Chelydra_serpentina	74.3868	1329
MA2573.1	Highly_Enriched	Promoter_G4	Poikilotherm	Chelydra_serpentina	81.794	1479
MA0747.2	Highly_Reduced	Promoter_G4	Poikilotherm	Chelydra_serpentina	89.9198	47381
MA0472.2	Moderately_Enriched	Promoter_G4	Poikilotherm	Chelydra_serpentina	86.0456	2787
MA2553.1	Moderately_Enriched	Promoter_G4	Poikilotherm	Chelydra_serpentina	83.9142	2351
MA2534.1	Moderately_Reduced	Promoter_G4	Poikilotherm	Chelydra_serpentina	70.1223	1546
MA1114.2	Moderately_Enriched	Promoter_G4	Poikilotherm	Chelydra_serpentina	64.2256	648
MA0145.2	Highly_Enriched	Promoter_G4	Poikilotherm	Chelydra_serpentina	79.1546	2266
MA0081.3	Highly_Reduced	Promoter_G4	Poikilotherm	Chelydra_serpentina	64.353	1853
MA2539.1	Moderately_Enriched	Promoter_G4	Poikilotherm	Chelydra_serpentina	97.343	15401
MA2328.1	Moderately_Enriched	Promoter_G4	Poikilotherm	Chelydra_serpentina	93.321	23577
MA0729.1	Highly_Enriched	Promoter_G4	Poikilotherm	Chelydra_serpentina	64.2067	402
MA1528.2	Highly_Enriched	Promoter_G4	Poikilotherm	Chelydra_serpentina	80.5626	2303
MA1553.2	Moderately_Enriched	Promoter_G4	Poikilotherm	Chelydra_serpentina	69.9396	293
MA0753.3	Highly_Reduced	Promoter_G4	Poikilotherm	Chelydra_serpentina	93.1042	50409
MA1713.2	Moderately_Enriched	Promoter_G4	Poikilotherm	Chelydra_serpentina	87.7299	9286
MA1630.3	Moderately_Reduced	Promoter_G4	Poikilotherm	Chelydra_serpentina	88.8653	86365
MA1653.2	Moderately_Reduced	Promoter_G4	Poikilotherm	Chelydra_serpentina	90.124	72156
MA1564.2	Highly_Reduced	Promoter_G4	Poikilotherm	Chelydra_serpentina	93.4799	48878
MA0146.3	Moderately_Enriched	Promoter_G4	Poikilotherm	Chelydra_serpentina	81.9379	2673
MA1516.2	Moderately_Enriched	Promoter_G4	Poikilotherm	Chelydra_serpentina	90.5054	8765
MA0821.2	Moderately_Enriched	Promoter_G4	Poikilotherm	Chelydra_serpentina	82.7993	1136
MA1474.2	Highly_Enriched	Promoter_G4	Poikilotherm	Chelydra_serpentina	77.8147	572
MA0857.1	Moderately_Enriched	Promoter_G4	Poikilotherm	Chelydra_serpentina	62.4444	450
MA0526.5	Moderately_Reduced	Promoter_G4	Poikilotherm	Chelydra_serpentina	64.8893	497
MA0620.4	Moderately_Reduced	Promoter_G4	Poikilotherm	Chelydra_serpentina	60.904	354
MA2340.1	Moderately_Enriched	Promoter_G4	Poikilotherm	Chelydra_serpentina	70.5839	822
MA0831.3	Moderately_Reduced	Promoter_G4	Poikilotherm	Chelydra_serpentina	62.3356	441
MA0111.1	Highly_Reduced	Promoter_G4	Poikilotherm	Chelydra_serpentina	67.9153	1296
MA2493.1	Moderately_Enriched	Promoter_G4	Poikilotherm	Chelydra_serpentina	71.621	634
MA0728.1	Highly_Enriched	Promoter_G4	Poikilotherm	Chelydra_serpentina	61.2393	468
MA1979.2	Highly_Enriched	Promoter_G4	Poikilotherm	Chelydra_serpentina	67.9666	959
MA1602.2	Moderately_Reduced	Promoter_G4	Poikilotherm	Chelydra_serpentina	63.8063	107
MA2489.1	Moderately_Enriched	Promoter_G4	Poikilotherm	Chelydra_serpentina	35.7744	66
MA1580.1	Moderately_Reduced	Promoter_G4	Poikilotherm	Chelydra_serpentina	43	40
MA0685.2	Moderately_Reduced	Promoter_G4	Poikilotherm	Chelydra_serpentina	94.445	68511
MA0079.5	Moderately_Reduced	Promoter_G4	Poikilotherm	Chelydra_serpentina	94.0192	73258
MA0478.2	Moderately_Enriched	Promoter_G4	Poikilotherm	Chelydra_serpentina	59.4444	198
MA1533.2	Highly_Enriched	Promoter_G4	Poikilotherm	Chelydra_serpentina	76.9819	846
MA0814.3	Moderately_Enriched	Promoter_G4	Poikilotherm	Chelydra_serpentina	87.9472	4861
MA0812.2	Moderately_Enriched	Promoter_G4	Poikilotherm	Chelydra_serpentina	91.2856	6203
MA2582.1	Highly_Enriched	Promoter_G4	Poikilotherm	Chelydra_serpentina	64.902	459
MA2593.1	Moderately_Enriched	Promoter_G4	Poikilotherm	Chelydra_serpentina	9.35743	249
MA0781.2	Moderately_Reduced	Promoter_G4	Poikilotherm	Chelydra_serpentina	77.0833	246
MA0646.2	Highly_Enriched	Promoter_G4	Poikilotherm	Chelydra_serpentina	75.4597	707
MA2580.1	Moderately_Enriched	Promoter_G4	Poikilotherm	Chelydra_serpentina	56.1017	236
MA1559.2	Moderately_Enriched	Promoter_G4	Poikilotherm	Chelydra_serpentina	69.4813	829
MA0765.4	Highly_Reduced	Promoter_G4	Poikilotherm	Chelydra_serpentina	68.0152	379
MA0764.4	Highly_Reduced	Promoter_G4	Poikilotherm	Chelydra_serpentina	67.7521	389
MA0028.3	Highly_Reduced	Promoter_G4	Poikilotherm	Chelydra_serpentina	67.6943	346
MA0640.3	Moderately_Enriched	Promoter_G4	Poikilotherm	Chelydra_serpentina	60.4627	951
MA0469.4	Moderately_Reduced	Promoter_G4	Poikilotherm	Chelydra_serpentina	54.0476	30
MA0519.2	Moderately_Enriched	Promoter_G4	Poikilotherm	Chelydra_serpentina	52.6679	177
MA1513.2	Moderately_Enriched	Promoter_G4	Poikilotherm	Chelydra_serpentina	98.2314	23875
MA2602.1	Moderately_Enriched	Promoter_G4	Poikilotherm	Chelydra_serpentina	87.6979	3284
MA2588.1	Highly_Enriched	Promoter_G4	Poikilotherm	Chelydra_serpentina	91.6225	3960
MA1099.3	Moderately_Enriched	Promoter_G4	Poikilotherm	Chelydra_serpentina	87.2021	1007
MA0632.3	Highly_Enriched	Promoter_G4	Poikilotherm	Chelydra_serpentina	93.1844	1304
MA0131.3	Moderately_Enriched	Promoter_G4	Poikilotherm	Chelydra_serpentina	84.2334	861
MA0745.3	Highly_Enriched	Promoter_G4	Poikilotherm	Chelydra_serpentina	71.1627	974
MA1998.2	Moderately_Enriched	Promoter_G4	Poikilotherm	Chelydra_serpentina	57.619	210
MA1645.2	Highly_Enriched	Promoter_G4	Poikilotherm	Chelydra_serpentina	60.381	643
MA0807.1	Moderately_Enriched	Promoter_G4	Poikilotherm	Chelydra_serpentina	59.1966	613
MA0801.1	Moderately_Enriched	Promoter_G4	Poikilotherm	Chelydra_serpentina	58.9332	382
MA2597.1	Highly_Enriched	Promoter_G4	Poikilotherm	Chelydra_serpentina	45.2114	201
MA0136.4	Moderately_Enriched	Promoter_G4	Poikilotherm	Chelydra_serpentina	47.7909	464
MA1547.2	Moderately_Enriched	Promoter_G4	Poikilotherm	Chelydra_serpentina	43.4955	221
MA1585.2	Moderately_Enriched	Promoter_G4	Poikilotherm	Chelydra_serpentina	58.8571	175
MA1125.2	Moderately_Enriched	Promoter_G4	Poikilotherm	Chelydra_serpentina	4	325
MA0837.3	Moderately_Reduced	Promoter_G4	Poikilotherm	Chelydra_serpentina	48.9474	19
MA2102.1	Moderately_Reduced	Promoter_G4	Poikilotherm	Chelydra_serpentina	37.5	14
MA1558.2	Highly_Enriched	Promoter_G4	Poikilotherm	Chelydra_serpentina	68.4134	886
MA1117.2	Highly_Reduced	Promoter_G4	Poikilotherm	Chelydra_serpentina	57.1429	1122
MA1523.2	Highly_Enriched	Promoter_G4	Poikilotherm	Chelydra_serpentina	57.1429	334
MA0508.4	Highly_Enriched	Promoter_G4	Poikilotherm	Chelydra_serpentina	42.8571	347
MA0712.3	Highly_Enriched	Promoter_G4	Poikilotherm	Chelydra_serpentina	42.8571	214
MA0073.2	Highly_Reduced	Promoter_G4	Poikilotherm	Anolis_carolinensis	75.0527	3523
MA0163.1	Highly_Reduced	Promoter_G4	Poikilotherm	Anolis_carolinensis	83.2878	4083
MA1721.2	Moderately_Enriched	Promoter_G4	Poikilotherm	Anolis_carolinensis	86.8577	1062
MA2688.1	Highly_Reduced	Promoter_G4	Poikilotherm	Anolis_carolinensis	72.837	5071
MA1712.2	Highly_Enriched	Promoter_G4	Poikilotherm	Anolis_carolinensis	82.56	625
MA2538.1	Moderately_Enriched	Promoter_G4	Poikilotherm	Anolis_carolinensis	89.849	839
MA2531.1	Moderately_Reduced	Promoter_G4	Poikilotherm	Anolis_carolinensis	64.5246	1718
MA0506.3	Highly_Enriched	Promoter_G4	Poikilotherm	Anolis_carolinensis	87.1767	232
MA0080.7	Highly_Reduced	Promoter_G4	Poikilotherm	Anolis_carolinensis	62.0652	1212
MA2494.1	Moderately_Reduced	Promoter_G4	Poikilotherm	Anolis_carolinensis	71.0237	603
MA1987.2	Highly_Reduced	Promoter_G4	Poikilotherm	Anolis_carolinensis	75.1917	4089
MA0741.1	Highly_Reduced	Promoter_G4	Poikilotherm	Anolis_carolinensis	92.4318	8860
MA0747.2	Highly_Reduced	Promoter_G4	Poikilotherm	Anolis_carolinensis	91.8718	8858
MA0081.3	Highly_Reduced	Promoter_G4	Poikilotherm	Anolis_carolinensis	61.4397	701
MA2534.1	Moderately_Reduced	Promoter_G4	Poikilotherm	Anolis_carolinensis	64.0391	158
MA1114.2	Moderately_Enriched	Promoter_G4	Poikilotherm	Anolis_carolinensis	61.1457	73
MA0472.2	Moderately_Enriched	Promoter_G4	Poikilotherm	Anolis_carolinensis	85.0173	341
MA0736.1	Moderately_Reduced	Promoter_G4	Poikilotherm	Anolis_carolinensis	81.7362	729
MA2553.1	Moderately_Enriched	Promoter_G4	Poikilotherm	Anolis_carolinensis	79.6162	187
MA2539.1	Moderately_Enriched	Promoter_G4	Poikilotherm	Anolis_carolinensis	97.6781	1137
MA2328.1	Moderately_Enriched	Promoter_G4	Poikilotherm	Anolis_carolinensis	91.5896	2183
MA1553.2	Moderately_Enriched	Promoter_G4	Poikilotherm	Anolis_carolinensis	74.359	57
MA2573.1	Highly_Enriched	Promoter_G4	Poikilotherm	Anolis_carolinensis	80.8068	157
MA1654.2	Moderately_Reduced	Promoter_G4	Poikilotherm	Anolis_carolinensis	70.7902	276
MA0753.3	Highly_Reduced	Promoter_G4	Poikilotherm	Anolis_carolinensis	91.4971	16592
MA1713.2	Moderately_Enriched	Promoter_G4	Poikilotherm	Anolis_carolinensis	88.206	864
MA1630.3	Moderately_Reduced	Promoter_G4	Poikilotherm	Anolis_carolinensis	88.2386	15045
MA1653.2	Moderately_Reduced	Promoter_G4	Poikilotherm	Anolis_carolinensis	89.2896	13796
MA1564.2	Highly_Reduced	Promoter_G4	Poikilotherm	Anolis_carolinensis	95.2091	9111
MA1714.2	Highly_Reduced	Promoter_G4	Poikilotherm	Anolis_carolinensis	62.2899	285
MA2528.1	Highly_Enriched	Promoter_G4	Poikilotherm	Anolis_carolinensis	69.778	152
MA0146.3	Moderately_Enriched	Promoter_G4	Poikilotherm	Anolis_carolinensis	82.1993	291
MA1516.2	Moderately_Enriched	Promoter_G4	Poikilotherm	Anolis_carolinensis	90.1518	988
MA0821.2	Moderately_Enriched	Promoter_G4	Poikilotherm	Anolis_carolinensis	85.9615	104
MA2519.1	Highly_Reduced	Promoter_G4	Poikilotherm	Anolis_carolinensis	70.8333	348
MA2545.1	Highly_Enriched	Promoter_G4	Poikilotherm	Anolis_carolinensis	67.9201	123
MA0526.5	Moderately_Reduced	Promoter_G4	Poikilotherm	Anolis_carolinensis	68.2353	34
MA0620.4	Moderately_Reduced	Promoter_G4	Poikilotherm	Anolis_carolinensis	63.8462	26
MA2340.1	Moderately_Enriched	Promoter_G4	Poikilotherm	Anolis_carolinensis	70.1639	122
MA0831.3	Moderately_Reduced	Promoter_G4	Poikilotherm	Anolis_carolinensis	68.6667	30
MA0145.2	Highly_Enriched	Promoter_G4	Poikilotherm	Anolis_carolinensis	74.9632	97
MA1531.2	Moderately_Reduced	Promoter_G4	Poikilotherm	Anolis_carolinensis	68.7292	172
MA0857.1	Moderately_Enriched	Promoter_G4	Poikilotherm	Anolis_carolinensis	62.8606	52
MA2524.1	Moderately_Enriched	Promoter_G4	Poikilotherm	Anolis_carolinensis	61.6793	169
MA0111.1	Highly_Reduced	Promoter_G4	Poikilotherm	Anolis_carolinensis	66.055	109
MA0685.2	Moderately_Reduced	Promoter_G4	Poikilotherm	Anolis_carolinensis	94.7884	12438
MA0079.5	Moderately_Reduced	Promoter_G4	Poikilotherm	Anolis_carolinensis	94.9512	12487
MA1528.2	Highly_Enriched	Promoter_G4	Poikilotherm	Anolis_carolinensis	77.9034	139
MA0814.3	Moderately_Enriched	Promoter_G4	Poikilotherm	Anolis_carolinensis	80.886	622
MA0812.2	Moderately_Enriched	Promoter_G4	Poikilotherm	Anolis_carolinensis	83.5838	599
MA2593.1	Moderately_Enriched	Promoter_G4	Poikilotherm	Anolis_carolinensis	9.23567	157
MA1474.2	Highly_Enriched	Promoter_G4	Poikilotherm	Anolis_carolinensis	84.386	114
MA0728.1	Highly_Enriched	Promoter_G4	Poikilotherm	Anolis_carolinensis	63.9024	41
MA2582.1	Highly_Enriched	Promoter_G4	Poikilotherm	Anolis_carolinensis	64.2593	54
MA1559.2	Moderately_Enriched	Promoter_G4	Poikilotherm	Anolis_carolinensis	69.1983	79
MA0765.4	Highly_Reduced	Promoter_G4	Poikilotherm	Anolis_carolinensis	67.031	61
MA0764.4	Highly_Reduced	Promoter_G4	Poikilotherm	Anolis_carolinensis	68.254	63
MA0028.3	Highly_Reduced	Promoter_G4	Poikilotherm	Anolis_carolinensis	67.6587	56
MA0640.3	Moderately_Enriched	Promoter_G4	Poikilotherm	Anolis_carolinensis	58.5987	157
MA0729.1	Highly_Enriched	Promoter_G4	Poikilotherm	Anolis_carolinensis	60.7357	74
MA0258.2	Highly_Enriched	Promoter_G4	Poikilotherm	Anolis_carolinensis	71.1828	93
MA0519.2	Moderately_Enriched	Promoter_G4	Poikilotherm	Anolis_carolinensis	52.9412	34
MA1532.2	Highly_Reduced	Promoter_G4	Poikilotherm	Anolis_carolinensis	66.8627	68
MA0646.2	Highly_Enriched	Promoter_G4	Poikilotherm	Anolis_carolinensis	72.5714	35
MA1533.2	Highly_Enriched	Promoter_G4	Poikilotherm	Anolis_carolinensis	75.5844	77
MA1513.2	Moderately_Enriched	Promoter_G4	Poikilotherm	Anolis_carolinensis	97.6879	2941
MA0478.2	Moderately_Enriched	Promoter_G4	Poikilotherm	Anolis_carolinensis	53.3333	9
MA2602.1	Moderately_Enriched	Promoter_G4	Poikilotherm	Anolis_carolinensis	88.3207	198
MA2588.1	Highly_Enriched	Promoter_G4	Poikilotherm	Anolis_carolinensis	92.3897	340
MA1099.3	Moderately_Enriched	Promoter_G4	Poikilotherm	Anolis_carolinensis	90.5172	174
MA2489.1	Moderately_Enriched	Promoter_G4	Poikilotherm	Anolis_carolinensis	36.3095	28
MA2493.1	Moderately_Enriched	Promoter_G4	Poikilotherm	Anolis_carolinensis	70.7692	40
MA1979.2	Highly_Enriched	Promoter_G4	Poikilotherm	Anolis_carolinensis	65.3846	52
MA0632.3	Highly_Enriched	Promoter_G4	Poikilotherm	Anolis_carolinensis	93.9922	258
MA0131.3	Moderately_Enriched	Promoter_G4	Poikilotherm	Anolis_carolinensis	84.6667	75
MA1602.2	Moderately_Reduced	Promoter_G4	Poikilotherm	Anolis_carolinensis	65.6566	9
MA0745.3	Highly_Enriched	Promoter_G4	Poikilotherm	Anolis_carolinensis	69.6875	80
MA1998.2	Moderately_Enriched	Promoter_G4	Poikilotherm	Anolis_carolinensis	54.4643	14
MA1645.2	Highly_Enriched	Promoter_G4	Poikilotherm	Anolis_carolinensis	59.5455	55
MA0807.1	Moderately_Enriched	Promoter_G4	Poikilotherm	Anolis_carolinensis	58.5366	41
MA0801.1	Moderately_Enriched	Promoter_G4	Poikilotherm	Anolis_carolinensis	57.3864	22
MA1585.2	Moderately_Enriched	Promoter_G4	Poikilotherm	Anolis_carolinensis	55.5556	7
MA2580.1	Moderately_Enriched	Promoter_G4	Poikilotherm	Anolis_carolinensis	57.5	20
MA2597.1	Highly_Enriched	Promoter_G4	Poikilotherm	Anolis_carolinensis	46.1538	13
MA0136.4	Moderately_Enriched	Promoter_G4	Poikilotherm	Anolis_carolinensis	48.5202	397
MA1547.2	Moderately_Enriched	Promoter_G4	Poikilotherm	Anolis_carolinensis	39.7727	11
MA1580.1	Moderately_Reduced	Promoter_G4	Poikilotherm	Anolis_carolinensis	32.5	4
MA1125.2	Moderately_Enriched	Promoter_G4	Poikilotherm	Anolis_carolinensis	2.86145	166
MA0781.2	Moderately_Reduced	Promoter_G4	Poikilotherm	Anolis_carolinensis	78.125	8
MA2102.1	Moderately_Reduced	Promoter_G4	Poikilotherm	Anolis_carolinensis	37.5	2
MA1558.2	Highly_Enriched	Promoter_G4	Poikilotherm	Anolis_carolinensis	67.2474	82
MA0469.4	Moderately_Reduced	Promoter_G4	Poikilotherm	Anolis_carolinensis	71.4286	2
MA1117.2	Highly_Reduced	Promoter_G4	Poikilotherm	Anolis_carolinensis	57.1429	216
MA1523.2	Highly_Enriched	Promoter_G4	Poikilotherm	Anolis_carolinensis	57.1429	33
MA0508.4	Highly_Enriched	Promoter_G4	Poikilotherm	Anolis_carolinensis	42.8571	169
MA0712.3	Highly_Enriched	Promoter_G4	Poikilotherm	Anolis_carolinensis	42.8571	17
MA0073.2	Highly_Reduced	Promoter_G4	Poikilotherm	Chrysemys_picta_bellii	73.3944	4377
MA1721.2	Moderately_Enriched	Promoter_G4	Poikilotherm	Chrysemys_picta_bellii	85.4858	1782
MA1712.2	Highly_Enriched	Promoter_G4	Poikilotherm	Chrysemys_picta_bellii	83.8978	1702
MA0163.1	Highly_Reduced	Promoter_G4	Poikilotherm	Chrysemys_picta_bellii	80.479	4849
MA2553.1	Moderately_Enriched	Promoter_G4	Poikilotherm	Chrysemys_picta_bellii	81.9137	375
MA2494.1	Moderately_Reduced	Promoter_G4	Poikilotherm	Chrysemys_picta_bellii	75.5545	746
MA2538.1	Moderately_Enriched	Promoter_G4	Poikilotherm	Chrysemys_picta_bellii	92.0465	1119
MA2688.1	Highly_Reduced	Promoter_G4	Poikilotherm	Chrysemys_picta_bellii	73.6271	3551
MA2531.1	Moderately_Reduced	Promoter_G4	Poikilotherm	Chrysemys_picta_bellii	68.1648	1157
MA1987.2	Highly_Reduced	Promoter_G4	Poikilotherm	Chrysemys_picta_bellii	76.4052	3421
MA0741.1	Highly_Reduced	Promoter_G4	Poikilotherm	Chrysemys_picta_bellii	87.9789	7176
MA1654.2	Moderately_Reduced	Promoter_G4	Poikilotherm	Chrysemys_picta_bellii	71.83	427
MA0747.2	Highly_Reduced	Promoter_G4	Poikilotherm	Chrysemys_picta_bellii	86.6173	6738
MA0145.2	Highly_Enriched	Promoter_G4	Poikilotherm	Chrysemys_picta_bellii	78.6085	385
MA2528.1	Highly_Enriched	Promoter_G4	Poikilotherm	Chrysemys_picta_bellii	73.8803	374
MA0736.1	Moderately_Reduced	Promoter_G4	Poikilotherm	Chrysemys_picta_bellii	81.9907	1573
MA1714.2	Highly_Reduced	Promoter_G4	Poikilotherm	Chrysemys_picta_bellii	63.999	219
MA0506.3	Highly_Enriched	Promoter_G4	Poikilotherm	Chrysemys_picta_bellii	86.8431	463
MA1532.2	Highly_Reduced	Promoter_G4	Poikilotherm	Chrysemys_picta_bellii	69.5527	231
MA2534.1	Moderately_Reduced	Promoter_G4	Poikilotherm	Chrysemys_picta_bellii	70.73	264
MA0081.3	Highly_Reduced	Promoter_G4	Poikilotherm	Chrysemys_picta_bellii	65.7059	419
MA2539.1	Moderately_Enriched	Promoter_G4	Poikilotherm	Chrysemys_picta_bellii	97.4725	2271
MA2328.1	Moderately_Enriched	Promoter_G4	Poikilotherm	Chrysemys_picta_bellii	92.4367	3829
MA1531.2	Moderately_Reduced	Promoter_G4	Poikilotherm	Chrysemys_picta_bellii	72.3977	398
MA0080.7	Highly_Reduced	Promoter_G4	Poikilotherm	Chrysemys_picta_bellii	64.6251	476
MA0753.3	Highly_Reduced	Promoter_G4	Poikilotherm	Chrysemys_picta_bellii	88.8959	15579
MA1713.2	Moderately_Enriched	Promoter_G4	Poikilotherm	Chrysemys_picta_bellii	86.9582	1532
MA1630.3	Moderately_Reduced	Promoter_G4	Poikilotherm	Chrysemys_picta_bellii	86.3736	14353
MA1653.2	Moderately_Reduced	Promoter_G4	Poikilotherm	Chrysemys_picta_bellii	87.5162	11426
MA1564.2	Highly_Reduced	Promoter_G4	Poikilotherm	Chrysemys_picta_bellii	91.3339	6597
MA0146.3	Moderately_Enriched	Promoter_G4	Poikilotherm	Chrysemys_picta_bellii	81.7226	447
MA1516.2	Moderately_Enriched	Promoter_G4	Poikilotherm	Chrysemys_picta_bellii	89.6314	1438
MA0821.2	Moderately_Enriched	Promoter_G4	Poikilotherm	Chrysemys_picta_bellii	82.5263	190
MA0728.1	Highly_Enriched	Promoter_G4	Poikilotherm	Chrysemys_picta_bellii	59.9111	75
MA0857.1	Moderately_Enriched	Promoter_G4	Poikilotherm	Chrysemys_picta_bellii	62.2845	87
MA2519.1	Highly_Reduced	Promoter_G4	Poikilotherm	Chrysemys_picta_bellii	72.6121	344
MA2340.1	Moderately_Enriched	Promoter_G4	Poikilotherm	Chrysemys_picta_bellii	71.3423	149
MA1979.2	Highly_Enriched	Promoter_G4	Poikilotherm	Chrysemys_picta_bellii	66.4324	185
MA1553.2	Moderately_Enriched	Promoter_G4	Poikilotherm	Chrysemys_picta_bellii	68.2336	54
MA2524.1	Moderately_Enriched	Promoter_G4	Poikilotherm	Chrysemys_picta_bellii	67.2078	88
MA1114.2	Moderately_Enriched	Promoter_G4	Poikilotherm	Chrysemys_picta_bellii	63.6364	147
MA2545.1	Highly_Enriched	Promoter_G4	Poikilotherm	Chrysemys_picta_bellii	66.8087	176
MA0258.2	Highly_Enriched	Promoter_G4	Poikilotherm	Chrysemys_picta_bellii	73.1532	185
MA2493.1	Moderately_Enriched	Promoter_G4	Poikilotherm	Chrysemys_picta_bellii	71.2946	123
MA0472.2	Moderately_Enriched	Promoter_G4	Poikilotherm	Chrysemys_picta_bellii	85.1793	403
MA2573.1	Highly_Enriched	Promoter_G4	Poikilotherm	Chrysemys_picta_bellii	83.2664	249
MA0685.2	Moderately_Reduced	Promoter_G4	Poikilotherm	Chrysemys_picta_bellii	92.708	10142
MA0079.5	Moderately_Reduced	Promoter_G4	Poikilotherm	Chrysemys_picta_bellii	92.3145	10934
MA0111.1	Highly_Reduced	Promoter_G4	Poikilotherm	Chrysemys_picta_bellii	67.8182	250
MA0478.2	Moderately_Enriched	Promoter_G4	Poikilotherm	Chrysemys_picta_bellii	60.9302	43
MA0729.1	Highly_Enriched	Promoter_G4	Poikilotherm	Chrysemys_picta_bellii	61.5033	85
MA1528.2	Highly_Enriched	Promoter_G4	Poikilotherm	Chrysemys_picta_bellii	80.8965	298
MA0814.3	Moderately_Enriched	Promoter_G4	Poikilotherm	Chrysemys_picta_bellii	87.6754	879
MA0812.2	Moderately_Enriched	Promoter_G4	Poikilotherm	Chrysemys_picta_bellii	91.1517	1095
MA2593.1	Moderately_Enriched	Promoter_G4	Poikilotherm	Chrysemys_picta_bellii	10.2778	36
MA1559.2	Moderately_Enriched	Promoter_G4	Poikilotherm	Chrysemys_picta_bellii	69.5543	177
MA0765.4	Highly_Reduced	Promoter_G4	Poikilotherm	Chrysemys_picta_bellii	69.6296	75
MA0764.4	Highly_Reduced	Promoter_G4	Poikilotherm	Chrysemys_picta_bellii	69.863	73
MA0028.3	Highly_Reduced	Promoter_G4	Poikilotherm	Chrysemys_picta_bellii	69.6697	74
MA0640.3	Moderately_Enriched	Promoter_G4	Poikilotherm	Chrysemys_picta_bellii	61.6108	189
MA1533.2	Highly_Enriched	Promoter_G4	Poikilotherm	Chrysemys_picta_bellii	78.5461	188
MA0831.3	Moderately_Reduced	Promoter_G4	Poikilotherm	Chrysemys_picta_bellii	65.5072	69
MA1474.2	Highly_Enriched	Promoter_G4	Poikilotherm	Chrysemys_picta_bellii	80.4819	83
MA0646.2	Highly_Enriched	Promoter_G4	Poikilotherm	Chrysemys_picta_bellii	76.5556	90
MA0526.5	Moderately_Reduced	Promoter_G4	Poikilotherm	Chrysemys_picta_bellii	70.9677	62
MA2582.1	Highly_Enriched	Promoter_G4	Poikilotherm	Chrysemys_picta_bellii	64.4304	79
MA1513.2	Moderately_Enriched	Promoter_G4	Poikilotherm	Chrysemys_picta_bellii	98.0946	3805
MA0620.4	Moderately_Reduced	Promoter_G4	Poikilotherm	Chrysemys_picta_bellii	63.6667	60
MA2602.1	Moderately_Enriched	Promoter_G4	Poikilotherm	Chrysemys_picta_bellii	87.0562	507
MA2588.1	Highly_Enriched	Promoter_G4	Poikilotherm	Chrysemys_picta_bellii	91.5087	686
MA1099.3	Moderately_Enriched	Promoter_G4	Poikilotherm	Chrysemys_picta_bellii	85.4532	171
MA0632.3	Highly_Enriched	Promoter_G4	Poikilotherm	Chrysemys_picta_bellii	91.8005	218
MA0131.3	Moderately_Enriched	Promoter_G4	Poikilotherm	Chrysemys_picta_bellii	84.8054	167
MA2580.1	Moderately_Enriched	Promoter_G4	Poikilotherm	Chrysemys_picta_bellii	56.1364	44
MA0745.3	Highly_Enriched	Promoter_G4	Poikilotherm	Chrysemys_picta_bellii	71.0696	194
MA0519.2	Moderately_Enriched	Promoter_G4	Poikilotherm	Chrysemys_picta_bellii	53.7037	30
MA0781.2	Moderately_Reduced	Promoter_G4	Poikilotherm	Chrysemys_picta_bellii	79.0625	40
MA1998.2	Moderately_Enriched	Promoter_G4	Poikilotherm	Chrysemys_picta_bellii	58.5648	54
MA1645.2	Highly_Enriched	Promoter_G4	Poikilotherm	Chrysemys_picta_bellii	60.9879	124
MA0807.1	Moderately_Enriched	Promoter_G4	Poikilotherm	Chrysemys_picta_bellii	59.9673	153
MA0801.1	Moderately_Enriched	Promoter_G4	Poikilotherm	Chrysemys_picta_bellii	60.1902	92
MA2597.1	Highly_Enriched	Promoter_G4	Poikilotherm	Chrysemys_picta_bellii	44.5	25
MA0136.4	Moderately_Enriched	Promoter_G4	Poikilotherm	Chrysemys_picta_bellii	48.0263	76
MA1547.2	Moderately_Enriched	Promoter_G4	Poikilotherm	Chrysemys_picta_bellii	41.6667	33
MA0469.4	Moderately_Reduced	Promoter_G4	Poikilotherm	Chrysemys_picta_bellii	64.2857	8
MA1585.2	Moderately_Enriched	Promoter_G4	Poikilotherm	Chrysemys_picta_bellii	59.9415	38
MA1602.2	Moderately_Reduced	Promoter_G4	Poikilotherm	Chrysemys_picta_bellii	64.6465	9
MA2489.1	Moderately_Enriched	Promoter_G4	Poikilotherm	Chrysemys_picta_bellii	34.7222	8
MA1125.2	Moderately_Enriched	Promoter_G4	Poikilotherm	Chrysemys_picta_bellii	3.98936	47
MA0837.3	Moderately_Reduced	Promoter_G4	Poikilotherm	Chrysemys_picta_bellii	55	4
MA2102.1	Moderately_Reduced	Promoter_G4	Poikilotherm	Chrysemys_picta_bellii	37.5	2
MA1558.2	Highly_Enriched	Promoter_G4	Poikilotherm	Chrysemys_picta_bellii	67.9348	184
MA1117.2	Highly_Reduced	Promoter_G4	Poikilotherm	Chrysemys_picta_bellii	57.1429	220
MA1523.2	Highly_Enriched	Promoter_G4	Poikilotherm	Chrysemys_picta_bellii	57.1429	62
MA0508.4	Highly_Enriched	Promoter_G4	Poikilotherm	Chrysemys_picta_bellii	42.8571	89
MA0712.3	Highly_Enriched	Promoter_G4	Poikilotherm	Chrysemys_picta_bellii	42.8571	30
MA1580.1	Moderately_Reduced	Promoter_G4	Poikilotherm	Chrysemys_picta_bellii	50	2
MA0073.2	Highly_Reduced	Promoter_G4	Poikilotherm	Pseudonaja_textlis	84.1621	24664
MA2553.1	Moderately_Enriched	Promoter_G4	Poikilotherm	Pseudonaja_textlis	83.1253	952
MA1721.2	Moderately_Enriched	Promoter_G4	Poikilotherm	Pseudonaja_textlis	89.0428	4704
MA1712.2	Highly_Enriched	Promoter_G4	Poikilotherm	Pseudonaja_textlis	85.468	2504
MA0163.1	Highly_Reduced	Promoter_G4	Poikilotherm	Pseudonaja_textlis	89.6631	22553
MA2531.1	Moderately_Reduced	Promoter_G4	Poikilotherm	Pseudonaja_textlis	66.5285	4633
MA2688.1	Highly_Reduced	Promoter_G4	Poikilotherm	Pseudonaja_textlis	81.222	20750
MA2494.1	Moderately_Reduced	Promoter_G4	Poikilotherm	Pseudonaja_textlis	75.3751	2139
MA2538.1	Moderately_Enriched	Promoter_G4	Poikilotherm	Pseudonaja_textlis	92.9804	4193
MA0080.7	Highly_Reduced	Promoter_G4	Poikilotherm	Pseudonaja_textlis	62.9396	3080
MA1987.2	Highly_Reduced	Promoter_G4	Poikilotherm	Pseudonaja_textlis	83.5923	21283
MA0736.1	Moderately_Reduced	Promoter_G4	Poikilotherm	Pseudonaja_textlis	85.1092	4663
MA2528.1	Highly_Enriched	Promoter_G4	Poikilotherm	Pseudonaja_textlis	74.4556	310
MA0506.3	Highly_Enriched	Promoter_G4	Poikilotherm	Pseudonaja_textlis	87.1896	1074
MA1531.2	Moderately_Reduced	Promoter_G4	Poikilotherm	Pseudonaja_textlis	70.8062	505
MA0741.1	Highly_Reduced	Promoter_G4	Poikilotherm	Pseudonaja_textlis	92.7455	39064
MA1654.2	Moderately_Reduced	Promoter_G4	Poikilotherm	Pseudonaja_textlis	71.9037	872
MA0747.2	Highly_Reduced	Promoter_G4	Poikilotherm	Pseudonaja_textlis	92.0979	38978
MA0145.2	Highly_Enriched	Promoter_G4	Poikilotherm	Pseudonaja_textlis	78.5426	495
MA1714.2	Highly_Reduced	Promoter_G4	Poikilotherm	Pseudonaja_textlis	64.984	856
MA2519.1	Highly_Reduced	Promoter_G4	Poikilotherm	Pseudonaja_textlis	71.486	995
MA0081.3	Highly_Reduced	Promoter_G4	Poikilotherm	Pseudonaja_textlis	62.0824	1584
MA1532.2	Highly_Reduced	Promoter_G4	Poikilotherm	Pseudonaja_textlis	66.2332	323
MA0472.2	Moderately_Enriched	Promoter_G4	Poikilotherm	Pseudonaja_textlis	86.5953	1197
MA0729.1	Highly_Enriched	Promoter_G4	Poikilotherm	Pseudonaja_textlis	63.6174	133
MA0857.1	Moderately_Enriched	Promoter_G4	Poikilotherm	Pseudonaja_textlis	60.4793	133
MA2545.1	Highly_Enriched	Promoter_G4	Poikilotherm	Pseudonaja_textlis	68.2818	356
MA2539.1	Moderately_Enriched	Promoter_G4	Poikilotherm	Pseudonaja_textlis	97.6598	6414
MA2328.1	Moderately_Enriched	Promoter_G4	Poikilotherm	Pseudonaja_textlis	93.8051	10478
MA2573.1	Highly_Enriched	Promoter_G4	Poikilotherm	Pseudonaja_textlis	81.297	550
MA2524.1	Moderately_Enriched	Promoter_G4	Poikilotherm	Pseudonaja_textlis	63.5704	223
MA0753.3	Highly_Reduced	Promoter_G4	Poikilotherm	Pseudonaja_textlis	91.6461	83908
MA1713.2	Moderately_Enriched	Promoter_G4	Poikilotherm	Pseudonaja_textlis	88.6514	3574
MA1630.3	Moderately_Reduced	Promoter_G4	Poikilotherm	Pseudonaja_textlis	90.0803	58060
MA1653.2	Moderately_Reduced	Promoter_G4	Poikilotherm	Pseudonaja_textlis	91.3843	50777
MA1564.2	Highly_Reduced	Promoter_G4	Poikilotherm	Pseudonaja_textlis	94.9576	39416
MA2534.1	Moderately_Reduced	Promoter_G4	Poikilotherm	Pseudonaja_textlis	69.6923	647
MA0146.3	Moderately_Enriched	Promoter_G4	Poikilotherm	Pseudonaja_textlis	81.9395	892
MA1516.2	Moderately_Enriched	Promoter_G4	Poikilotherm	Pseudonaja_textlis	90.8533	3047
MA1528.2	Highly_Enriched	Promoter_G4	Poikilotherm	Pseudonaja_textlis	78.3868	503
MA0728.1	Highly_Enriched	Promoter_G4	Poikilotherm	Pseudonaja_textlis	59.6795	104
MA1474.2	Highly_Enriched	Promoter_G4	Poikilotherm	Pseudonaja_textlis	81.3942	208
MA0526.5	Moderately_Reduced	Promoter_G4	Poikilotherm	Pseudonaja_textlis	64.2857	112
MA0620.4	Moderately_Reduced	Promoter_G4	Poikilotherm	Pseudonaja_textlis	58.1132	106
MA2340.1	Moderately_Enriched	Promoter_G4	Poikilotherm	Pseudonaja_textlis	72.5964	389
MA0831.3	Moderately_Reduced	Promoter_G4	Poikilotherm	Pseudonaja_textlis	59.28	125
MA2489.1	Moderately_Enriched	Promoter_G4	Poikilotherm	Pseudonaja_textlis	33.5578	99
MA1979.2	Highly_Enriched	Promoter_G4	Poikilotherm	Pseudonaja_textlis	67.4104	251
MA0111.1	Highly_Reduced	Promoter_G4	Poikilotherm	Pseudonaja_textlis	67.3108	334
MA1533.2	Highly_Enriched	Promoter_G4	Poikilotherm	Pseudonaja_textlis	80.8715	306
MA0685.2	Moderately_Reduced	Promoter_G4	Poikilotherm	Pseudonaja_textlis	95.4624	49911
MA0079.5	Moderately_Reduced	Promoter_G4	Poikilotherm	Pseudonaja_textlis	95.331	50982
MA0258.2	Highly_Enriched	Promoter_G4	Poikilotherm	Pseudonaja_textlis	73.8016	299
MA2582.1	Highly_Enriched	Promoter_G4	Poikilotherm	Pseudonaja_textlis	64.7594	187
MA0478.2	Moderately_Enriched	Promoter_G4	Poikilotherm	Pseudonaja_textlis	56.0784	51
MA1114.2	Moderately_Enriched	Promoter_G4	Poikilotherm	Pseudonaja_textlis	62.5064	177
MA1553.2	Moderately_Enriched	Promoter_G4	Poikilotherm	Pseudonaja_textlis	66.1749	73
MA0814.3	Moderately_Enriched	Promoter_G4	Poikilotherm	Pseudonaja_textlis	86.7733	1376
MA0812.2	Moderately_Enriched	Promoter_G4	Poikilotherm	Pseudonaja_textlis	89.7921	1550
MA0821.2	Moderately_Enriched	Promoter_G4	Poikilotherm	Pseudonaja_textlis	85.0857	350
MA2593.1	Moderately_Enriched	Promoter_G4	Poikilotherm	Pseudonaja_textlis	10.4015	523
MA0781.2	Moderately_Reduced	Promoter_G4	Poikilotherm	Pseudonaja_textlis	75.875	150
MA1602.2	Moderately_Reduced	Promoter_G4	Poikilotherm	Pseudonaja_textlis	66.9697	30
MA0765.4	Highly_Reduced	Promoter_G4	Poikilotherm	Pseudonaja_textlis	69.8033	209
MA0764.4	Highly_Reduced	Promoter_G4	Poikilotherm	Pseudonaja_textlis	70.8061	204
MA0028.3	Highly_Reduced	Promoter_G4	Poikilotherm	Pseudonaja_textlis	70.7447	188
MA0640.3	Moderately_Enriched	Promoter_G4	Poikilotherm	Pseudonaja_textlis	58.126	536
MA0519.2	Moderately_Enriched	Promoter_G4	Poikilotherm	Pseudonaja_textlis	52.9716	129
MA2493.1	Moderately_Enriched	Promoter_G4	Poikilotherm	Pseudonaja_textlis	70.4348	115
MA0646.2	Highly_Enriched	Promoter_G4	Poikilotherm	Pseudonaja_textlis	73.9286	140
MA1559.2	Moderately_Enriched	Promoter_G4	Poikilotherm	Pseudonaja_textlis	69.8911	255
MA1513.2	Moderately_Enriched	Promoter_G4	Poikilotherm	Pseudonaja_textlis	98.1449	11529
MA2580.1	Moderately_Enriched	Promoter_G4	Poikilotherm	Pseudonaja_textlis	55.625	48
MA2602.1	Moderately_Enriched	Promoter_G4	Poikilotherm	Pseudonaja_textlis	88.7168	1017
MA2588.1	Highly_Enriched	Promoter_G4	Poikilotherm	Pseudonaja_textlis	91.9631	1546
MA1099.3	Moderately_Enriched	Promoter_G4	Poikilotherm	Pseudonaja_textlis	88.9826	430
MA1585.2	Moderately_Enriched	Promoter_G4	Poikilotherm	Pseudonaja_textlis	51.6667	20
MA0632.3	Highly_Enriched	Promoter_G4	Poikilotherm	Pseudonaja_textlis	93.9871	659
MA0131.3	Moderately_Enriched	Promoter_G4	Poikilotherm	Pseudonaja_textlis	84.6268	422
MA0745.3	Highly_Enriched	Promoter_G4	Poikilotherm	Pseudonaja_textlis	71.0037	269
MA0837.3	Moderately_Reduced	Promoter_G4	Poikilotherm	Pseudonaja_textlis	51.1111	9
MA1998.2	Moderately_Enriched	Promoter_G4	Poikilotherm	Pseudonaja_textlis	56.5217	46
MA1645.2	Highly_Enriched	Promoter_G4	Poikilotherm	Pseudonaja_textlis	61.1374	211
MA0807.1	Moderately_Enriched	Promoter_G4	Poikilotherm	Pseudonaja_textlis	59.506	167
MA0801.1	Moderately_Enriched	Promoter_G4	Poikilotherm	Pseudonaja_textlis	59.7477	109
MA0469.4	Moderately_Reduced	Promoter_G4	Poikilotherm	Pseudonaja_textlis	60.8374	29
MA1580.1	Moderately_Reduced	Promoter_G4	Poikilotherm	Pseudonaja_textlis	32.5	8
MA2597.1	Highly_Enriched	Promoter_G4	Poikilotherm	Pseudonaja_textlis	48.0159	63
MA0136.4	Moderately_Enriched	Promoter_G4	Poikilotherm	Pseudonaja_textlis	47.9673	658
MA1547.2	Moderately_Enriched	Promoter_G4	Poikilotherm	Pseudonaja_textlis	40.483	88
MA2102.1	Moderately_Reduced	Promoter_G4	Poikilotherm	Pseudonaja_textlis	35.9375	16
MA1125.2	Moderately_Enriched	Promoter_G4	Poikilotherm	Pseudonaja_textlis	3.09654	549
MA1558.2	Highly_Enriched	Promoter_G4	Poikilotherm	Pseudonaja_textlis	68.2257	281
MA1117.2	Highly_Reduced	Promoter_G4	Poikilotherm	Pseudonaja_textlis	57.1429	639
MA1523.2	Highly_Enriched	Promoter_G4	Poikilotherm	Pseudonaja_textlis	57.1429	104
MA0508.4	Highly_Enriched	Promoter_G4	Poikilotherm	Pseudonaja_textlis	42.8571	577
MA0712.3	Highly_Enriched	Promoter_G4	Poikilotherm	Pseudonaja_textlis	42.8571	76
MA0073.2	Highly_Reduced	Promoter_G4	Poikilotherm	Sphenodon_punctatus	74.8826	19508
MA2494.1	Moderately_Reduced	Promoter_G4	Poikilotherm	Sphenodon_punctatus	71.6163	2639
MA2688.1	Highly_Reduced	Promoter_G4	Poikilotherm	Sphenodon_punctatus	75.8221	16414
MA1721.2	Moderately_Enriched	Promoter_G4	Poikilotherm	Sphenodon_punctatus	83.5543	4342
MA0163.1	Highly_Reduced	Promoter_G4	Poikilotherm	Sphenodon_punctatus	82.5684	20430
MA2553.1	Moderately_Enriched	Promoter_G4	Poikilotherm	Sphenodon_punctatus	79.5153	881
MA1712.2	Highly_Enriched	Promoter_G4	Poikilotherm	Sphenodon_punctatus	81.3999	3265
MA2528.1	Highly_Enriched	Promoter_G4	Poikilotherm	Sphenodon_punctatus	71.2359	973
MA2519.1	Highly_Reduced	Promoter_G4	Poikilotherm	Sphenodon_punctatus	70.2886	1178
MA1987.2	Highly_Reduced	Promoter_G4	Poikilotherm	Sphenodon_punctatus	78.1893	15466
MA2538.1	Moderately_Enriched	Promoter_G4	Poikilotherm	Sphenodon_punctatus	90.8081	2349
MA2531.1	Moderately_Reduced	Promoter_G4	Poikilotherm	Sphenodon_punctatus	65.9868	4530
MA0506.3	Highly_Enriched	Promoter_G4	Poikilotherm	Sphenodon_punctatus	83.7128	1120
MA0080.7	Highly_Reduced	Promoter_G4	Poikilotherm	Sphenodon_punctatus	61.9792	2304
MA0728.1	Highly_Enriched	Promoter_G4	Poikilotherm	Sphenodon_punctatus	60.646	258
MA0736.1	Moderately_Reduced	Promoter_G4	Poikilotherm	Sphenodon_punctatus	80.2307	5493
MA0741.1	Highly_Reduced	Promoter_G4	Poikilotherm	Sphenodon_punctatus	89.7036	34018
MA0747.2	Highly_Reduced	Promoter_G4	Poikilotherm	Sphenodon_punctatus	88.6177	33612
MA1654.2	Moderately_Reduced	Promoter_G4	Poikilotherm	Sphenodon_punctatus	68.9452	1766
MA0145.2	Highly_Enriched	Promoter_G4	Poikilotherm	Sphenodon_punctatus	75.8081	959
MA1714.2	Highly_Reduced	Promoter_G4	Poikilotherm	Sphenodon_punctatus	63.3897	931
MA1532.2	Highly_Reduced	Promoter_G4	Poikilotherm	Sphenodon_punctatus	65.8005	1270
MA0081.3	Highly_Reduced	Promoter_G4	Poikilotherm	Sphenodon_punctatus	62.3806	1900
MA2534.1	Moderately_Reduced	Promoter_G4	Poikilotherm	Sphenodon_punctatus	68.5128	1277
MA2573.1	Highly_Enriched	Promoter_G4	Poikilotherm	Sphenodon_punctatus	77.0115	638
MA1114.2	Moderately_Enriched	Promoter_G4	Poikilotherm	Sphenodon_punctatus	63.2177	608
MA0111.1	Highly_Reduced	Promoter_G4	Poikilotherm	Sphenodon_punctatus	64.5439	1192
MA1531.2	Moderately_Reduced	Promoter_G4	Poikilotherm	Sphenodon_punctatus	68.9106	1651
MA2545.1	Highly_Enriched	Promoter_G4	Poikilotherm	Sphenodon_punctatus	65.3313	830
MA0258.2	Highly_Enriched	Promoter_G4	Poikilotherm	Sphenodon_punctatus	72.5091	736
MA0472.2	Moderately_Enriched	Promoter_G4	Poikilotherm	Sphenodon_punctatus	81.004	1150
MA0857.1	Moderately_Enriched	Promoter_G4	Poikilotherm	Sphenodon_punctatus	61.3894	287
MA2539.1	Moderately_Enriched	Promoter_G4	Poikilotherm	Sphenodon_punctatus	97.5168	4325
MA2328.1	Moderately_Enriched	Promoter_G4	Poikilotherm	Sphenodon_punctatus	92.5344	8002
MA2493.1	Moderately_Enriched	Promoter_G4	Poikilotherm	Sphenodon_punctatus	67.8629	433
MA0753.3	Highly_Reduced	Promoter_G4	Poikilotherm	Sphenodon_punctatus	89.2893	75897
MA1713.2	Moderately_Enriched	Promoter_G4	Poikilotherm	Sphenodon_punctatus	85.7253	3371
MA1630.3	Moderately_Reduced	Promoter_G4	Poikilotherm	Sphenodon_punctatus	87.5357	58322
MA1653.2	Moderately_Reduced	Promoter_G4	Poikilotherm	Sphenodon_punctatus	89.1315	45424
MA1564.2	Highly_Reduced	Promoter_G4	Poikilotherm	Sphenodon_punctatus	93.0313	32448
MA0146.3	Moderately_Enriched	Promoter_G4	Poikilotherm	Sphenodon_punctatus	79.8967	1258
MA1516.2	Moderately_Enriched	Promoter_G4	Poikilotherm	Sphenodon_punctatus	86.2916	3306
MA0821.2	Moderately_Enriched	Promoter_G4	Poikilotherm	Sphenodon_punctatus	79.7727	352
MA1474.2	Highly_Enriched	Promoter_G4	Poikilotherm	Sphenodon_punctatus	76.5476	252
MA0526.5	Moderately_Reduced	Promoter_G4	Poikilotherm	Sphenodon_punctatus	65.3302	212
MA0620.4	Moderately_Reduced	Promoter_G4	Poikilotherm	Sphenodon_punctatus	59.8837	172
MA2340.1	Moderately_Enriched	Promoter_G4	Poikilotherm	Sphenodon_punctatus	69.6652	448
MA0831.3	Moderately_Reduced	Promoter_G4	Poikilotherm	Sphenodon_punctatus	62.9469	207
MA0729.1	Highly_Enriched	Promoter_G4	Poikilotherm	Sphenodon_punctatus	62.7566	341
MA2582.1	Highly_Enriched	Promoter_G4	Poikilotherm	Sphenodon_punctatus	64.1734	369
MA2580.1	Moderately_Enriched	Promoter_G4	Poikilotherm	Sphenodon_punctatus	57.3206	209
MA1979.2	Highly_Enriched	Promoter_G4	Poikilotherm	Sphenodon_punctatus	66.5182	606
MA1528.2	Highly_Enriched	Promoter_G4	Poikilotherm	Sphenodon_punctatus	77.6769	1054
MA2489.1	Moderately_Enriched	Promoter_G4	Poikilotherm	Sphenodon_punctatus	37.1585	61
MA0685.2	Moderately_Reduced	Promoter_G4	Poikilotherm	Sphenodon_punctatus	93.5289	43963
MA0079.5	Moderately_Reduced	Promoter_G4	Poikilotherm	Sphenodon_punctatus	93.3621	45756
MA1533.2	Highly_Enriched	Promoter_G4	Poikilotherm	Sphenodon_punctatus	72.0758	387
MA0478.2	Moderately_Enriched	Promoter_G4	Poikilotherm	Sphenodon_punctatus	58.4821	112
MA2524.1	Moderately_Enriched	Promoter_G4	Poikilotherm	Sphenodon_punctatus	62.6935	320
MA0646.2	Highly_Enriched	Promoter_G4	Poikilotherm	Sphenodon_punctatus	70.4104	463
MA0814.3	Moderately_Enriched	Promoter_G4	Poikilotherm	Sphenodon_punctatus	84.836	1782
MA0812.2	Moderately_Enriched	Promoter_G4	Poikilotherm	Sphenodon_punctatus	88.7943	1880
MA1602.2	Moderately_Reduced	Promoter_G4	Poikilotherm	Sphenodon_punctatus	59.5455	60
MA2593.1	Moderately_Enriched	Promoter_G4	Poikilotherm	Sphenodon_punctatus	8.40678	295
MA0837.3	Moderately_Reduced	Promoter_G4	Poikilotherm	Sphenodon_punctatus	38.125	16
MA1553.2	Moderately_Enriched	Promoter_G4	Poikilotherm	Sphenodon_punctatus	66.2177	217
MA1559.2	Moderately_Enriched	Promoter_G4	Poikilotherm	Sphenodon_punctatus	67.5119	631
MA0765.4	Highly_Reduced	Promoter_G4	Poikilotherm	Sphenodon_punctatus	66.0244	173
MA0764.4	Highly_Reduced	Promoter_G4	Poikilotherm	Sphenodon_punctatus	65.4938	180
MA0028.3	Highly_Reduced	Promoter_G4	Poikilotherm	Sphenodon_punctatus	64.8258	169
MA0640.3	Moderately_Enriched	Promoter_G4	Poikilotherm	Sphenodon_punctatus	59.2593	771
MA0519.2	Moderately_Enriched	Promoter_G4	Poikilotherm	Sphenodon_punctatus	51.9345	224
MA0781.2	Moderately_Reduced	Promoter_G4	Poikilotherm	Sphenodon_punctatus	68.4552	106
MA1585.2	Moderately_Enriched	Promoter_G4	Poikilotherm	Sphenodon_punctatus	57.1429	196
MA1513.2	Moderately_Enriched	Promoter_G4	Poikilotherm	Sphenodon_punctatus	97.8266	8811
MA2602.1	Moderately_Enriched	Promoter_G4	Poikilotherm	Sphenodon_punctatus	85.6176	1348
MA2588.1	Highly_Enriched	Promoter_G4	Poikilotherm	Sphenodon_punctatus	89.9909	1375
MA1099.3	Moderately_Enriched	Promoter_G4	Poikilotherm	Sphenodon_punctatus	84.2678	379
MA1580.1	Moderately_Reduced	Promoter_G4	Poikilotherm	Sphenodon_punctatus	40	38
MA0632.3	Highly_Enriched	Promoter_G4	Poikilotherm	Sphenodon_punctatus	92.2432	477
MA0131.3	Moderately_Enriched	Promoter_G4	Poikilotherm	Sphenodon_punctatus	83.3433	418
MA0745.3	Highly_Enriched	Promoter_G4	Poikilotherm	Sphenodon_punctatus	69.6057	672
MA1998.2	Moderately_Enriched	Promoter_G4	Poikilotherm	Sphenodon_punctatus	56.8452	210
MA1645.2	Highly_Enriched	Promoter_G4	Poikilotherm	Sphenodon_punctatus	59.1893	589
MA0807.1	Moderately_Enriched	Promoter_G4	Poikilotherm	Sphenodon_punctatus	58.2267	430
MA0801.1	Moderately_Enriched	Promoter_G4	Poikilotherm	Sphenodon_punctatus	57.4897	242
MA0469.4	Moderately_Reduced	Promoter_G4	Poikilotherm	Sphenodon_punctatus	54.7619	24
MA2597.1	Highly_Enriched	Promoter_G4	Poikilotherm	Sphenodon_punctatus	45.5625	200
MA0136.4	Moderately_Enriched	Promoter_G4	Poikilotherm	Sphenodon_punctatus	47.847	598
MA1547.2	Moderately_Enriched	Promoter_G4	Poikilotherm	Sphenodon_punctatus	42.2433	224
MA1125.2	Moderately_Enriched	Promoter_G4	Poikilotherm	Sphenodon_punctatus	3.31704	358
MA2102.1	Moderately_Reduced	Promoter_G4	Poikilotherm	Sphenodon_punctatus	37.5	10
MA1558.2	Highly_Enriched	Promoter_G4	Poikilotherm	Sphenodon_punctatus	67.6233	672
MA1117.2	Highly_Reduced	Promoter_G4	Poikilotherm	Sphenodon_punctatus	57.1429	1218
MA1523.2	Highly_Enriched	Promoter_G4	Poikilotherm	Sphenodon_punctatus	57.1429	301
MA0508.4	Highly_Enriched	Promoter_G4	Poikilotherm	Sphenodon_punctatus	42.8571	365
MA0712.3	Highly_Enriched	Promoter_G4	Poikilotherm	Sphenodon_punctatus	42.8571	212
MA0073.2	Highly_Reduced	Promoter_G4	Poikilotherm	Varanus_komodoensis	81.7484	10278
MA2688.1	Highly_Reduced	Promoter_G4	Poikilotherm	Varanus_komodoensis	77.8856	10769
MA1721.2	Moderately_Enriched	Promoter_G4	Poikilotherm	Varanus_komodoensis	89.8857	7560
MA0163.1	Highly_Reduced	Promoter_G4	Poikilotherm	Varanus_komodoensis	86.6841	13242
MA1712.2	Highly_Enriched	Promoter_G4	Poikilotherm	Varanus_komodoensis	87.6448	5130
MA2528.1	Highly_Enriched	Promoter_G4	Poikilotherm	Varanus_komodoensis	75.1246	652
MA2531.1	Moderately_Reduced	Promoter_G4	Poikilotherm	Varanus_komodoensis	66.9777	2572
MA2494.1	Moderately_Reduced	Promoter_G4	Poikilotherm	Varanus_komodoensis	76.6524	2235
MA2519.1	Highly_Reduced	Promoter_G4	Poikilotherm	Varanus_komodoensis	73.2199	953
MA1987.2	Highly_Reduced	Promoter_G4	Poikilotherm	Varanus_komodoensis	81.5443	11792
MA2538.1	Moderately_Enriched	Promoter_G4	Poikilotherm	Varanus_komodoensis	93.6847	6673
MA1714.2	Highly_Reduced	Promoter_G4	Poikilotherm	Varanus_komodoensis	65.3208	584
MA0080.7	Highly_Reduced	Promoter_G4	Poikilotherm	Varanus_komodoensis	63.3828	1735
MA0258.2	Highly_Enriched	Promoter_G4	Poikilotherm	Varanus_komodoensis	76.4249	455
MA0145.2	Highly_Enriched	Promoter_G4	Poikilotherm	Varanus_komodoensis	84.4779	1219
MA1654.2	Moderately_Reduced	Promoter_G4	Poikilotherm	Varanus_komodoensis	74.1979	846
MA0506.3	Highly_Enriched	Promoter_G4	Poikilotherm	Varanus_komodoensis	90.1652	2664
MA2553.1	Moderately_Enriched	Promoter_G4	Poikilotherm	Varanus_komodoensis	85.5266	1670
MA2493.1	Moderately_Enriched	Promoter_G4	Poikilotherm	Varanus_komodoensis	71.355	239
MA0736.1	Moderately_Reduced	Promoter_G4	Poikilotherm	Varanus_komodoensis	86.2755	4722
MA0741.1	Highly_Reduced	Promoter_G4	Poikilotherm	Varanus_komodoensis	92.3559	24681
MA0747.2	Highly_Reduced	Promoter_G4	Poikilotherm	Varanus_komodoensis	91.7318	23416
MA1532.2	Highly_Reduced	Promoter_G4	Poikilotherm	Varanus_komodoensis	72.926	311
MA0472.2	Moderately_Enriched	Promoter_G4	Poikilotherm	Varanus_komodoensis	89.7402	1921
MA0081.3	Highly_Reduced	Promoter_G4	Poikilotherm	Varanus_komodoensis	63.1743	1058
MA2534.1	Moderately_Reduced	Promoter_G4	Poikilotherm	Varanus_komodoensis	68.9981	568
MA2545.1	Highly_Enriched	Promoter_G4	Poikilotherm	Varanus_komodoensis	70.8713	329
MA1114.2	Moderately_Enriched	Promoter_G4	Poikilotherm	Varanus_komodoensis	63.6364	191
MA1531.2	Moderately_Reduced	Promoter_G4	Poikilotherm	Varanus_komodoensis	76.6447	608
MA2539.1	Moderately_Enriched	Promoter_G4	Poikilotherm	Varanus_komodoensis	98.2063	12856
MA2328.1	Moderately_Enriched	Promoter_G4	Poikilotherm	Varanus_komodoensis	94.2815	14913
MA0753.3	Highly_Reduced	Promoter_G4	Poikilotherm	Varanus_komodoensis	92.2835	49270
MA1713.2	Moderately_Enriched	Promoter_G4	Poikilotherm	Varanus_komodoensis	89.8765	5668
MA1630.3	Moderately_Reduced	Promoter_G4	Poikilotherm	Varanus_komodoensis	90.0002	40610
MA1653.2	Moderately_Reduced	Promoter_G4	Poikilotherm	Varanus_komodoensis	90.9576	38231
MA1564.2	Highly_Reduced	Promoter_G4	Poikilotherm	Varanus_komodoensis	94.7938	24367
MA0146.3	Moderately_Enriched	Promoter_G4	Poikilotherm	Varanus_komodoensis	81.7598	1199
MA1516.2	Moderately_Enriched	Promoter_G4	Poikilotherm	Varanus_komodoensis	92.1126	4691
MA0821.2	Moderately_Enriched	Promoter_G4	Poikilotherm	Varanus_komodoensis	85.8247	776
MA1553.2	Moderately_Enriched	Promoter_G4	Poikilotherm	Varanus_komodoensis	71.8833	87
MA2524.1	Moderately_Enriched	Promoter_G4	Poikilotherm	Varanus_komodoensis	64.2108	159
MA2573.1	Highly_Enriched	Promoter_G4	Poikilotherm	Varanus_komodoensis	83.4356	619
MA1474.2	Highly_Enriched	Promoter_G4	Poikilotherm	Varanus_komodoensis	80.2372	253
MA0526.5	Moderately_Reduced	Promoter_G4	Poikilotherm	Varanus_komodoensis	69.1566	166
MA0620.4	Moderately_Reduced	Promoter_G4	Poikilotherm	Varanus_komodoensis	66.9231	104
MA0831.3	Moderately_Reduced	Promoter_G4	Poikilotherm	Varanus_komodoensis	67.6812	138
MA0111.1	Highly_Reduced	Promoter_G4	Poikilotherm	Varanus_komodoensis	68.897	375
MA1528.2	Highly_Enriched	Promoter_G4	Poikilotherm	Varanus_komodoensis	82.86	1006
MA0857.1	Moderately_Enriched	Promoter_G4	Poikilotherm	Varanus_komodoensis	63.8845	158
MA0728.1	Highly_Enriched	Promoter_G4	Poikilotherm	Varanus_komodoensis	64.8851	116
MA0646.2	Highly_Enriched	Promoter_G4	Poikilotherm	Varanus_komodoensis	76.5916	311
MA2489.1	Moderately_Enriched	Promoter_G4	Poikilotherm	Varanus_komodoensis	40.5556	50
MA0685.2	Moderately_Reduced	Promoter_G4	Poikilotherm	Varanus_komodoensis	95.6289	36335
MA0079.5	Moderately_Reduced	Promoter_G4	Poikilotherm	Varanus_komodoensis	95.1422	38602
MA1979.2	Highly_Enriched	Promoter_G4	Poikilotherm	Varanus_komodoensis	66.5782	339
MA0478.2	Moderately_Enriched	Promoter_G4	Poikilotherm	Varanus_komodoensis	59.1045	67
MA0729.1	Highly_Enriched	Promoter_G4	Poikilotherm	Varanus_komodoensis	63.7449	135
MA0781.2	Moderately_Reduced	Promoter_G4	Poikilotherm	Varanus_komodoensis	76.0045	168
MA2340.1	Moderately_Enriched	Promoter_G4	Poikilotherm	Varanus_komodoensis	72.0225	445
MA0814.3	Moderately_Enriched	Promoter_G4	Poikilotherm	Varanus_komodoensis	88.9967	2267
MA0812.2	Moderately_Enriched	Promoter_G4	Poikilotherm	Varanus_komodoensis	92.4415	2893
MA2582.1	Highly_Enriched	Promoter_G4	Poikilotherm	Varanus_komodoensis	64.1423	239
MA2593.1	Moderately_Enriched	Promoter_G4	Poikilotherm	Varanus_komodoensis	12.3077	78
MA1559.2	Moderately_Enriched	Promoter_G4	Poikilotherm	Varanus_komodoensis	69.7892	427
MA0765.4	Highly_Reduced	Promoter_G4	Poikilotherm	Varanus_komodoensis	69.0182	189
MA0764.4	Highly_Reduced	Promoter_G4	Poikilotherm	Varanus_komodoensis	69.161	196
MA0028.3	Highly_Reduced	Promoter_G4	Poikilotherm	Varanus_komodoensis	68.7037	180
MA0640.3	Moderately_Enriched	Promoter_G4	Poikilotherm	Varanus_komodoensis	59.7946	422
MA0519.2	Moderately_Enriched	Promoter_G4	Poikilotherm	Varanus_komodoensis	54.2977	159
MA1533.2	Highly_Enriched	Promoter_G4	Poikilotherm	Varanus_komodoensis	84.127	441
MA1585.2	Moderately_Enriched	Promoter_G4	Poikilotherm	Varanus_komodoensis	55.8824	34
MA2580.1	Moderately_Enriched	Promoter_G4	Poikilotherm	Varanus_komodoensis	57.4194	62
MA1513.2	Moderately_Enriched	Promoter_G4	Poikilotherm	Varanus_komodoensis	98.4073	16772
MA2602.1	Moderately_Enriched	Promoter_G4	Poikilotherm	Varanus_komodoensis	89.3946	1755
MA2588.1	Highly_Enriched	Promoter_G4	Poikilotherm	Varanus_komodoensis	94.0371	2591
MA1099.3	Moderately_Enriched	Promoter_G4	Poikilotherm	Varanus_komodoensis	91.5094	901
MA0632.3	Highly_Enriched	Promoter_G4	Poikilotherm	Varanus_komodoensis	95.272	1351
MA0131.3	Moderately_Enriched	Promoter_G4	Poikilotherm	Varanus_komodoensis	85.4792	600
MA1602.2	Moderately_Reduced	Promoter_G4	Poikilotherm	Varanus_komodoensis	66.6667	48
MA0745.3	Highly_Enriched	Promoter_G4	Poikilotherm	Varanus_komodoensis	70.7967	455
MA0469.4	Moderately_Reduced	Promoter_G4	Poikilotherm	Varanus_komodoensis	53.7594	19
MA1998.2	Moderately_Enriched	Promoter_G4	Poikilotherm	Varanus_komodoensis	56.5104	48
MA1645.2	Highly_Enriched	Promoter_G4	Poikilotherm	Varanus_komodoensis	60.3865	207
MA0807.1	Moderately_Enriched	Promoter_G4	Poikilotherm	Varanus_komodoensis	59.2767	159
MA0801.1	Moderately_Enriched	Promoter_G4	Poikilotherm	Varanus_komodoensis	57.2619	105
MA1580.1	Moderately_Reduced	Promoter_G4	Poikilotherm	Varanus_komodoensis	41.6667	6
MA2597.1	Highly_Enriched	Promoter_G4	Poikilotherm	Varanus_komodoensis	45.3125	64
MA0136.4	Moderately_Enriched	Promoter_G4	Poikilotherm	Varanus_komodoensis	48.2341	361
MA1547.2	Moderately_Enriched	Promoter_G4	Poikilotherm	Varanus_komodoensis	43.9453	64
MA0837.3	Moderately_Reduced	Promoter_G4	Poikilotherm	Varanus_komodoensis	42.3077	13
MA1125.2	Moderately_Enriched	Promoter_G4	Poikilotherm	Varanus_komodoensis	4.59184	98
MA2102.1	Moderately_Reduced	Promoter_G4	Poikilotherm	Varanus_komodoensis	37.5	2
MA1558.2	Highly_Enriched	Promoter_G4	Poikilotherm	Varanus_komodoensis	68.268	452
MA1117.2	Highly_Reduced	Promoter_G4	Poikilotherm	Varanus_komodoensis	57.1429	394
MA1523.2	Highly_Enriched	Promoter_G4	Poikilotherm	Varanus_komodoensis	57.1429	95
MA0508.4	Highly_Enriched	Promoter_G4	Poikilotherm	Varanus_komodoensis	42.8571	306
MA0712.3	Highly_Enriched	Promoter_G4	Poikilotherm	Varanus_komodoensis	42.8571	69
MA0073.2	Highly_Reduced	Promoter_G4	Poikilotherm	Notechis_scutatus	84.8018	19530
MA2553.1	Moderately_Enriched	Promoter_G4	Poikilotherm	Notechis_scutatus	82.1571	751
MA1721.2	Moderately_Enriched	Promoter_G4	Poikilotherm	Notechis_scutatus	89.1309	3529
MA0163.1	Highly_Reduced	Promoter_G4	Poikilotherm	Notechis_scutatus	90.3966	18866
MA2531.1	Moderately_Reduced	Promoter_G4	Poikilotherm	Notechis_scutatus	65.8703	3449
MA2494.1	Moderately_Reduced	Promoter_G4	Poikilotherm	Notechis_scutatus	75.1424	1692
MA2545.1	Highly_Enriched	Promoter_G4	Poikilotherm	Notechis_scutatus	67.3266	322
MA1712.2	Highly_Enriched	Promoter_G4	Poikilotherm	Notechis_scutatus	85.4021	1989
MA1987.2	Highly_Reduced	Promoter_G4	Poikilotherm	Notechis_scutatus	84.587	17128
MA2688.1	Highly_Reduced	Promoter_G4	Poikilotherm	Notechis_scutatus	82.5784	16829
MA2519.1	Highly_Reduced	Promoter_G4	Poikilotherm	Notechis_scutatus	71.5917	788
MA0736.1	Moderately_Reduced	Promoter_G4	Poikilotherm	Notechis_scutatus	85.3617	3687
MA2538.1	Moderately_Enriched	Promoter_G4	Poikilotherm	Notechis_scutatus	92.7817	3079
MA0506.3	Highly_Enriched	Promoter_G4	Poikilotherm	Notechis_scutatus	85.364	870
MA0080.7	Highly_Reduced	Promoter_G4	Poikilotherm	Notechis_scutatus	62.8065	2190
MA1714.2	Highly_Reduced	Promoter_G4	Poikilotherm	Notechis_scutatus	64.9564	676
MA2528.1	Highly_Enriched	Promoter_G4	Poikilotherm	Notechis_scutatus	73.5059	297
MA0741.1	Highly_Reduced	Promoter_G4	Poikilotherm	Notechis_scutatus	93.5478	34052
MA0747.2	Highly_Reduced	Promoter_G4	Poikilotherm	Notechis_scutatus	93.0335	33626
MA2573.1	Highly_Enriched	Promoter_G4	Poikilotherm	Notechis_scutatus	81.2334	427
MA0081.3	Highly_Reduced	Promoter_G4	Poikilotherm	Notechis_scutatus	62.8986	1182
MA2534.1	Moderately_Reduced	Promoter_G4	Poikilotherm	Notechis_scutatus	69.9301	546
MA0728.1	Highly_Enriched	Promoter_G4	Poikilotherm	Notechis_scutatus	62.7106	91
MA0472.2	Moderately_Enriched	Promoter_G4	Poikilotherm	Notechis_scutatus	86.4887	872
MA1531.2	Moderately_Reduced	Promoter_G4	Poikilotherm	Notechis_scutatus	70.9204	492
MA2539.1	Moderately_Enriched	Promoter_G4	Poikilotherm	Notechis_scutatus	97.8597	4976
MA2328.1	Moderately_Enriched	Promoter_G4	Poikilotherm	Notechis_scutatus	93.5838	7453
MA2524.1	Moderately_Enriched	Promoter_G4	Poikilotherm	Notechis_scutatus	64.0542	144
MA0753.3	Highly_Reduced	Promoter_G4	Poikilotherm	Notechis_scutatus	92.0921	68042
MA1713.2	Moderately_Enriched	Promoter_G4	Poikilotherm	Notechis_scutatus	88.5624	2678
MA1630.3	Moderately_Reduced	Promoter_G4	Poikilotherm	Notechis_scutatus	90.9747	48445
MA1653.2	Moderately_Reduced	Promoter_G4	Poikilotherm	Notechis_scutatus	92.3291	42827
MA1564.2	Highly_Reduced	Promoter_G4	Poikilotherm	Notechis_scutatus	95.7209	34206
MA0146.3	Moderately_Enriched	Promoter_G4	Poikilotherm	Notechis_scutatus	81.4263	638
MA1516.2	Moderately_Enriched	Promoter_G4	Poikilotherm	Notechis_scutatus	90.3187	2385
MA0145.2	Highly_Enriched	Promoter_G4	Poikilotherm	Notechis_scutatus	76.834	407
MA0258.2	Highly_Enriched	Promoter_G4	Poikilotherm	Notechis_scutatus	73.1714	247
MA0857.1	Moderately_Enriched	Promoter_G4	Poikilotherm	Notechis_scutatus	63.256	124
MA1654.2	Moderately_Reduced	Promoter_G4	Poikilotherm	Notechis_scutatus	71.6953	714
MA1474.2	Highly_Enriched	Promoter_G4	Poikilotherm	Notechis_scutatus	80.1156	173
MA2340.1	Moderately_Enriched	Promoter_G4	Poikilotherm	Notechis_scutatus	71.4098	305
MA1532.2	Highly_Reduced	Promoter_G4	Poikilotherm	Notechis_scutatus	67.0625	320
MA1979.2	Highly_Enriched	Promoter_G4	Poikilotherm	Notechis_scutatus	65.6186	194
MA1533.2	Highly_Enriched	Promoter_G4	Poikilotherm	Notechis_scutatus	82.003	223
MA0729.1	Highly_Enriched	Promoter_G4	Poikilotherm	Notechis_scutatus	63.0796	127
MA0111.1	Highly_Reduced	Promoter_G4	Poikilotherm	Notechis_scutatus	67.0175	285
MA0685.2	Moderately_Reduced	Promoter_G4	Poikilotherm	Notechis_scutatus	96.0791	42827
MA0079.5	Moderately_Reduced	Promoter_G4	Poikilotherm	Notechis_scutatus	95.8613	43878
MA1114.2	Moderately_Enriched	Promoter_G4	Poikilotherm	Notechis_scutatus	64.0417	157
MA1553.2	Moderately_Enriched	Promoter_G4	Poikilotherm	Notechis_scutatus	66.3055	71
MA2582.1	Highly_Enriched	Promoter_G4	Poikilotherm	Notechis_scutatus	64.9275	138
MA0814.3	Moderately_Enriched	Promoter_G4	Poikilotherm	Notechis_scutatus	86.101	1096
MA0812.2	Moderately_Enriched	Promoter_G4	Poikilotherm	Notechis_scutatus	88.8525	1220
MA2489.1	Moderately_Enriched	Promoter_G4	Poikilotherm	Notechis_scutatus	32.6165	93
MA2593.1	Moderately_Enriched	Promoter_G4	Poikilotherm	Notechis_scutatus	9.84576	389
MA1528.2	Highly_Enriched	Promoter_G4	Poikilotherm	Notechis_scutatus	78.3447	315
MA0526.5	Moderately_Reduced	Promoter_G4	Poikilotherm	Notechis_scutatus	63.8017	121
MA0620.4	Moderately_Reduced	Promoter_G4	Poikilotherm	Notechis_scutatus	56.7857	112
MA0831.3	Moderately_Reduced	Promoter_G4	Poikilotherm	Notechis_scutatus	58.018	111
MA0646.2	Highly_Enriched	Promoter_G4	Poikilotherm	Notechis_scutatus	71.3043	138
MA0765.4	Highly_Reduced	Promoter_G4	Poikilotherm	Notechis_scutatus	67.5105	158
MA0764.4	Highly_Reduced	Promoter_G4	Poikilotherm	Notechis_scutatus	68.4211	152
[truncated: 37,461 more rows]

## Sheet: TFBS mean thermal summary
Motif_ID	Enrichment_Tier	Category	Thermal_Group	Mean_GC	Hit_Count
MA0024.3	Highly_Enriched	Genome_Free	Homeotherm	63.9881	66649
MA0024.3	Highly_Enriched	Genome_Free	Poikilotherm	62.3296	45475
MA0024.3	Highly_Enriched	Genome_G4	Homeotherm	73.2883	120133
MA0024.3	Highly_Enriched	Genome_G4	Poikilotherm	70.3504	49951
MA0028.3	Highly_Reduced	Promoter_Free	Homeotherm	62.7609	587429
MA0028.3	Highly_Reduced	Promoter_Free	Poikilotherm	61.3585	104728
MA0028.3	Highly_Reduced	Promoter_G4	Homeotherm	68.8019	33425
MA0028.3	Highly_Reduced	Promoter_G4	Poikilotherm	66.8071	3786
MA0028.3	Moderately_Enriched	Genome_Free	Homeotherm	56.0998	124441
MA0028.3	Moderately_Enriched	Genome_Free	Poikilotherm	57.51	70981
MA0028.3	Moderately_Enriched	Genome_G4	Homeotherm	67.0068	177659
MA0028.3	Moderately_Enriched	Genome_G4	Poikilotherm	64.6824	69780
MA0067.3	Highly_Enriched	Genome_Free	Homeotherm	56.3437	92708
MA0067.3	Highly_Enriched	Genome_Free	Poikilotherm	56.4878	42908
MA0067.3	Highly_Enriched	Genome_G4	Homeotherm	74.301	181194
MA0067.3	Highly_Enriched	Genome_G4	Poikilotherm	72.4228	54085
MA0073.2	Highly_Reduced	Promoter_Free	Homeotherm	62.5648	13841506
MA0073.2	Highly_Reduced	Promoter_Free	Poikilotherm	63.0322	1328487
MA0073.2	Highly_Reduced	Promoter_G4	Homeotherm	77.7083	1809297
MA0073.2	Highly_Reduced	Promoter_G4	Poikilotherm	76.1237	327384
MA0076.3	Highly_Enriched	Genome_Free	Homeotherm	56.2479	273072
MA0076.3	Highly_Enriched	Genome_Free	Poikilotherm	57.6713	126984
MA0076.3	Highly_Enriched	Genome_G4	Homeotherm	64.9327	413355
MA0076.3	Highly_Enriched	Genome_G4	Poikilotherm	63.9665	140878
MA0079.5	Moderately_Reduced	Promoter_Free	Homeotherm	89.6744	14500756
MA0079.5	Moderately_Reduced	Promoter_Free	Poikilotherm	88.4319	1177223
MA0079.5	Moderately_Reduced	Promoter_G4	Homeotherm	92.9658	3881876
MA0079.5	Moderately_Reduced	Promoter_G4	Poikilotherm	93.8851	800413
MA0080.7	Highly_Reduced	Promoter_Free	Homeotherm	50.8338	2983033
MA0080.7	Highly_Reduced	Promoter_Free	Poikilotherm	50.8023	534992
MA0080.7	Highly_Reduced	Promoter_G4	Homeotherm	62.9148	228730
MA0080.7	Highly_Reduced	Promoter_G4	Poikilotherm	62.9677	39368
MA0081.3	Highly_Reduced	Promoter_Free	Homeotherm	51.0064	2286766
MA0081.3	Highly_Reduced	Promoter_Free	Poikilotherm	50.945	402348
MA0081.3	Highly_Reduced	Promoter_G4	Homeotherm	63.3993	167461
MA0081.3	Highly_Reduced	Promoter_G4	Poikilotherm	63.2732	28005
MA0104.5	Moderately_Enriched	Genome_Free	Homeotherm	69.5988	305452
MA0104.5	Moderately_Enriched	Genome_Free	Poikilotherm	70.1107	86384
MA0104.5	Moderately_Enriched	Genome_G4	Homeotherm	73.8453	599848
MA0104.5	Moderately_Enriched	Genome_G4	Poikilotherm	73.7459	162024
MA0111.1	Highly_Reduced	Promoter_Free	Homeotherm	58.1853	977356
MA0111.1	Highly_Reduced	Promoter_Free	Poikilotherm	58.0507	179721
MA0111.1	Highly_Reduced	Promoter_G4	Homeotherm	67.3323	74388
MA0111.1	Highly_Reduced	Promoter_G4	Poikilotherm	66.5978	15368
MA0113.4	Moderately_Reduced	Genome_Free	Homeotherm	45.7423	305862
MA0113.4	Moderately_Reduced	Genome_Free	Poikilotherm	45.7375	114173
MA0113.4	Moderately_Reduced	Genome_G4	Homeotherm	61.8485	198493
MA0113.4	Moderately_Reduced	Genome_G4	Poikilotherm	59.0219	60521
MA0124.3	Highly_Enriched	Genome_Free	Homeotherm	42.8571	284878
MA0124.3	Highly_Enriched	Genome_Free	Poikilotherm	42.8571	94982
MA0124.3	Highly_Enriched	Genome_G4	Homeotherm	42.8571	150864
MA0124.3	Highly_Enriched	Genome_G4	Poikilotherm	42.8571	83993
MA0131.3	Moderately_Enriched	Genome_Free	Homeotherm	81.4956	66760
MA0131.3	Moderately_Enriched	Genome_Free	Poikilotherm	81.573	39433
MA0131.3	Moderately_Enriched	Genome_G4	Homeotherm	83.0607	655089
MA0131.3	Moderately_Enriched	Genome_G4	Poikilotherm	83.3644	166126
MA0131.3	Moderately_Enriched	Promoter_Free	Homeotherm	83.7222	653961
MA0131.3	Moderately_Enriched	Promoter_Free	Poikilotherm	83.0003	78267
MA0131.3	Moderately_Enriched	Promoter_G4	Homeotherm	84.6245	112645
MA0131.3	Moderately_Enriched	Promoter_G4	Poikilotherm	84.2691	9057
MA0136.4	Moderately_Enriched	Promoter_Free	Homeotherm	45.581	1725055
MA0136.4	Moderately_Enriched	Promoter_Free	Poikilotherm	45.9761	320194
MA0136.4	Moderately_Enriched	Promoter_G4	Homeotherm	47.8737	48282
MA0136.4	Moderately_Enriched	Promoter_G4	Poikilotherm	47.9613	8666
MA0143.5	Moderately_Reduced	Genome_Free	Homeotherm	42.8571	379324
MA0143.5	Moderately_Reduced	Genome_Free	Poikilotherm	42.8571	161823
MA0143.5	Moderately_Reduced	Genome_G4	Homeotherm	42.8571	182141
MA0143.5	Moderately_Reduced	Genome_G4	Poikilotherm	42.8571	85584
MA0145.2	Highly_Enriched	Promoter_Free	Homeotherm	70.3808	1979132
MA0145.2	Highly_Enriched	Promoter_Free	Poikilotherm	66.468	340185
MA0145.2	Highly_Enriched	Promoter_G4	Homeotherm	80.7347	161809
MA0145.2	Highly_Enriched	Promoter_G4	Poikilotherm	76.6218	21605
MA0146.3	Moderately_Enriched	Promoter_Free	Homeotherm	76.9487	2417992
MA0146.3	Moderately_Enriched	Promoter_Free	Poikilotherm	75.7291	264278
MA0146.3	Moderately_Enriched	Promoter_G4	Homeotherm	82.1783	261278
MA0146.3	Moderately_Enriched	Promoter_G4	Poikilotherm	81.0204	25197
MA0163.1	Highly_Reduced	Promoter_Free	Homeotherm	77.2925	10787615
MA0163.1	Highly_Reduced	Promoter_Free	Poikilotherm	76.3098	705393
MA0163.1	Highly_Reduced	Promoter_G4	Homeotherm	82.9834	2058798
MA0163.1	Highly_Reduced	Promoter_G4	Poikilotherm	83.314	355850
MA0258.2	Highly_Enriched	Promoter_Free	Homeotherm	63.6925	1566562
MA0258.2	Highly_Enriched	Promoter_Free	Poikilotherm	61.8807	244416
MA0258.2	Highly_Enriched	Promoter_G4	Homeotherm	74.2312	87243
MA0258.2	Highly_Enriched	Promoter_G4	Poikilotherm	72.6028	13468
MA0469.4	Highly_Reduced	Genome_Free	Homeotherm	44.4363	84458
MA0469.4	Highly_Reduced	Genome_Free	Poikilotherm	45.2195	55185
MA0469.4	Highly_Reduced	Genome_G4	Homeotherm	51.5866	38006
MA0469.4	Highly_Reduced	Genome_G4	Poikilotherm	53.3463	16139
MA0469.4	Moderately_Reduced	Promoter_Free	Homeotherm	48.4746	193201
MA0469.4	Moderately_Reduced	Promoter_Free	Poikilotherm	47.3935	64395
MA0469.4	Moderately_Reduced	Promoter_G4	Homeotherm	55.1476	2508
MA0469.4	Moderately_Reduced	Promoter_G4	Poikilotherm	55.626	492
MA0472.2	Moderately_Enriched	Promoter_Free	Homeotherm	81.1708	1555034
MA0472.2	Moderately_Enriched	Promoter_Free	Poikilotherm	76.783	190414
MA0472.2	Moderately_Enriched	Promoter_G4	Homeotherm	88.4218	312918
MA0472.2	Moderately_Enriched	Promoter_G4	Poikilotherm	84.2875	26714
MA0475.3	Moderately_Reduced	Genome_Free	Homeotherm	45.7503	168856
MA0475.3	Moderately_Reduced	Genome_Free	Poikilotherm	48.6398	83597
MA0475.3	Moderately_Reduced	Genome_G4	Homeotherm	57.5558	118483
MA0475.3	Moderately_Reduced	Genome_G4	Poikilotherm	55.8809	48545
MA0478.2	Moderately_Enriched	Genome_Free	Homeotherm	48.8209	684922
MA0478.2	Moderately_Enriched	Genome_Free	Poikilotherm	46.5327	165185
MA0478.2	Moderately_Enriched	Genome_G4	Homeotherm	59.3185	350741
MA0478.2	Moderately_Enriched	Genome_G4	Poikilotherm	58.0417	95018
MA0478.2	Moderately_Enriched	Promoter_Free	Homeotherm	51.0129	989941
MA0478.2	Moderately_Enriched	Promoter_Free	Poikilotherm	47.7346	128212
MA0478.2	Moderately_Enriched	Promoter_G4	Homeotherm	59.6383	13477
MA0478.2	Moderately_Enriched	Promoter_G4	Poikilotherm	57.6885	2296
MA0499.3	Moderately_Enriched	Genome_Free	Homeotherm	63.5423	770574
MA0499.3	Moderately_Enriched	Genome_Free	Poikilotherm	63.1737	307469
MA0499.3	Moderately_Enriched	Genome_G4	Homeotherm	70.9261	1333243
MA0499.3	Moderately_Enriched	Genome_G4	Poikilotherm	70.5402	432447
MA0500.3	Highly_Enriched	Genome_Free	Homeotherm	65.9128	1054648
MA0500.3	Highly_Enriched	Genome_Free	Poikilotherm	66.0848	502520
MA0500.3	Highly_Enriched	Genome_G4	Homeotherm	70.0296	1385172
MA0500.3	Highly_Enriched	Genome_G4	Poikilotherm	70.0265	513948
MA0506.3	Highly_Enriched	Promoter_Free	Homeotherm	83.8939	3034632
MA0506.3	Highly_Enriched	Promoter_Free	Poikilotherm	79.8466	389333
MA0506.3	Highly_Enriched	Promoter_G4	Homeotherm	89.5468	334327
MA0506.3	Highly_Enriched	Promoter_G4	Poikilotherm	85.8555	27840
MA0508.4	Highly_Enriched	Genome_Free	Homeotherm	42.8571	925312
MA0508.4	Highly_Enriched	Genome_Free	Poikilotherm	42.8571	222320
MA0508.4	Highly_Enriched	Genome_G4	Homeotherm	42.8571	774840
MA0508.4	Highly_Enriched	Genome_G4	Poikilotherm	42.8571	202782
MA0508.4	Highly_Enriched	Promoter_Free	Homeotherm	42.8571	1188591
MA0508.4	Highly_Enriched	Promoter_Free	Poikilotherm	42.8571	198974
MA0508.4	Highly_Enriched	Promoter_G4	Homeotherm	42.8571	34061
MA0508.4	Highly_Enriched	Promoter_G4	Poikilotherm	42.8571	6319
MA0509.3	Moderately_Reduced	Genome_Free	Homeotherm	42.2832	216726
MA0509.3	Moderately_Reduced	Genome_Free	Poikilotherm	44.0864	90070
MA0509.3	Moderately_Reduced	Genome_G4	Homeotherm	58.5022	108868
MA0509.3	Moderately_Reduced	Genome_G4	Poikilotherm	57.5816	37344
MA0514.3	Moderately_Reduced	Genome_Free	Homeotherm	42.8571	379324
MA0514.3	Moderately_Reduced	Genome_Free	Poikilotherm	42.8571	161823
MA0514.3	Moderately_Reduced	Genome_G4	Homeotherm	42.8571	182141
MA0514.3	Moderately_Reduced	Genome_G4	Poikilotherm	42.8571	85584
MA0519.2	Highly_Enriched	Genome_Free	Homeotherm	39.4826	858689
MA0519.2	Highly_Enriched	Genome_Free	Poikilotherm	40.5765	224498
MA0519.2	Highly_Enriched	Genome_G4	Homeotherm	50.0077	384775
MA0519.2	Highly_Enriched	Genome_G4	Poikilotherm	50.1272	167437
MA0519.2	Moderately_Enriched	Promoter_Free	Homeotherm	42.1415	1168045
MA0519.2	Moderately_Enriched	Promoter_Free	Poikilotherm	42.1018	191822
MA0519.2	Moderately_Enriched	Promoter_G4	Homeotherm	53.0154	20839
MA0519.2	Moderately_Enriched	Promoter_G4	Poikilotherm	52.2845	5000
MA0526.5	Moderately_Reduced	Promoter_Free	Homeotherm	61.1538	637358
MA0526.5	Moderately_Reduced	Promoter_Free	Poikilotherm	56.9912	155505
MA0526.5	Moderately_Reduced	Promoter_G4	Homeotherm	67.5959	29478
MA0526.5	Moderately_Reduced	Promoter_G4	Poikilotherm	65.849	4518
MA0527.2	Moderately_Enriched	Genome_Free	Homeotherm	67.1167	62292
MA0527.2	Moderately_Enriched	Genome_Free	Poikilotherm	67.5746	26377
MA0527.2	Moderately_Enriched	Genome_G4	Homeotherm	82.894	264193
MA0527.2	Moderately_Enriched	Genome_G4	Poikilotherm	80.2094	63701
MA0594.3	Moderately_Reduced	Genome_Free	Homeotherm	42.8571	25894
MA0594.3	Moderately_Reduced	Genome_Free	Poikilotherm	42.8571	13534
MA0594.3	Moderately_Reduced	Genome_G4	Homeotherm	42.8571	5350
MA0594.3	Moderately_Reduced	Genome_G4	Poikilotherm	42.8571	4266
MA0595.1	Moderately_Enriched	Genome_Free	Homeotherm	54.9466	478215
MA0595.1	Moderately_Enriched	Genome_Free	Poikilotherm	54.702	147169
MA0595.1	Moderately_Enriched	Genome_G4	Homeotherm	63.2679	710815
MA0595.1	Moderately_Enriched	Genome_G4	Poikilotherm	62.8295	195857
MA0596.1	Highly_Enriched	Genome_Free	Homeotherm	52.0198	495547
MA0596.1	Highly_Enriched	Genome_Free	Poikilotherm	52.1759	171942
MA0596.1	Highly_Enriched	Genome_G4	Homeotherm	61.814	721903
MA0596.1	Highly_Enriched	Genome_G4	Poikilotherm	61.3377	199611
MA0604.1	Moderately_Reduced	Genome_Free	Homeotherm	54.2661	90325
MA0604.1	Moderately_Reduced	Genome_Free	Poikilotherm	54.1417	41245
MA0604.1	Moderately_Reduced	Genome_G4	Homeotherm	59.3419	60142
MA0604.1	Moderately_Reduced	Genome_G4	Poikilotherm	58.2579	21083
MA0620.4	Moderately_Reduced	Promoter_Free	Homeotherm	54.3025	644648
MA0620.4	Moderately_Reduced	Promoter_Free	Poikilotherm	51.8949	179286
MA0620.4	Moderately_Reduced	Promoter_G4	Homeotherm	64.3876	20874
MA0620.4	Moderately_Reduced	Promoter_G4	Poikilotherm	60.8233	3754
MA0632.3	Highly_Enriched	Promoter_Free	Homeotherm	91.1388	1466188
MA0632.3	Highly_Enriched	Promoter_Free	Poikilotherm	89.6239	204103
MA0632.3	Highly_Enriched	Promoter_G4	Homeotherm	94.8829	153155
MA0632.3	Highly_Enriched	Promoter_G4	Poikilotherm	92.9514	13632
MA0632.3	Moderately_Enriched	Genome_Free	Homeotherm	81.117	124994
MA0632.3	Moderately_Enriched	Genome_Free	Poikilotherm	82.3171	54745
MA0632.3	Moderately_Enriched	Genome_G4	Homeotherm	92.2082	380097
MA0632.3	Moderately_Enriched	Genome_G4	Poikilotherm	87.8276	93348
MA0638.2	Highly_Reduced	Genome_Free	Homeotherm	53.3782	124135
MA0638.2	Highly_Reduced	Genome_Free	Poikilotherm	53.9631	49632
MA0638.2	Highly_Reduced	Genome_G4	Homeotherm	66.3228	113429
MA0638.2	Highly_Reduced	Genome_G4	Poikilotherm	64.9612	36514
MA0640.3	Moderately_Enriched	Promoter_Free	Homeotherm	53.8386	1788299
MA0640.3	Moderately_Enriched	Promoter_Free	Poikilotherm	53.3866	308580
MA0640.3	Moderately_Enriched	Promoter_G4	Homeotherm	60.1359	73739
MA0640.3	Moderately_Enriched	Promoter_G4	Poikilotherm	59.3723	12115
MA0646.2	Highly_Enriched	Promoter_Free	Homeotherm	67.6077	673266
MA0646.2	Highly_Enriched	Promoter_Free	Poikilotherm	64.1229	120645
MA0646.2	Highly_Enriched	Promoter_G4	Homeotherm	75.4387	57298
MA0646.2	Highly_Enriched	Promoter_G4	Poikilotherm	72.5141	7460
MA0685.2	Moderately_Reduced	Promoter_Free	Homeotherm	88.6884	13917586
MA0685.2	Moderately_Reduced	Promoter_Free	Poikilotherm	87.569	1077974
MA0685.2	Moderately_Reduced	Promoter_G4	Homeotherm	93.0135	3805447
MA0685.2	Moderately_Reduced	Promoter_G4	Poikilotherm	94.1097	761903
MA0693.4	Moderately_Enriched	Genome_Free	Homeotherm	42.8571	439668
MA0693.4	Moderately_Enriched	Genome_Free	Poikilotherm	42.8571	115082
MA0693.4	Moderately_Enriched	Genome_G4	Homeotherm	42.8571	110756
MA0693.4	Moderately_Enriched	Genome_G4	Poikilotherm	42.8571	53408
MA0712.3	Highly_Enriched	Promoter_Free	Homeotherm	42.8571	644238
MA0712.3	Highly_Enriched	Promoter_Free	Poikilotherm	42.8571	65123
MA0712.3	Highly_Enriched	Promoter_G4	Homeotherm	42.8571	13047
MA0712.3	Highly_Enriched	Promoter_G4	Poikilotherm	42.8571	3065
MA0728.1	Highly_Enriched	Promoter_Free	Homeotherm	50.5282	1068252
MA0728.1	Highly_Enriched	Promoter_Free	Poikilotherm	48.6969	141705
MA0728.1	Highly_Enriched	Promoter_G4	Homeotherm	64.2633	28295
MA0728.1	Highly_Enriched	Promoter_G4	Poikilotherm	61.476	4917
MA0729.1	Highly_Enriched	Promoter_Free	Homeotherm	48.1578	851397
MA0729.1	Highly_Enriched	Promoter_Free	Poikilotherm	46.5886	133802
MA0729.1	Highly_Enriched	Promoter_G4	Homeotherm	64.9358	29953
MA0729.1	Highly_Enriched	Promoter_G4	Poikilotherm	62.8968	5171
MA0736.1	Moderately_Reduced	Promoter_Free	Homeotherm	78.5402	2239293
MA0736.1	Moderately_Reduced	Promoter_Free	Poikilotherm	76.8803	471267
MA0736.1	Moderately_Reduced	Promoter_G4	Homeotherm	83.4099	523362
MA0736.1	Moderately_Reduced	Promoter_G4	Poikilotherm	82.2583	105926
MA0739.2	Moderately_Enriched	Genome_Free	Homeotherm	66.1794	569914
MA0739.2	Moderately_Enriched	Genome_Free	Poikilotherm	65.4672	224562
MA0739.2	Moderately_Enriched	Genome_G4	Homeotherm	69.2428	896133
MA0739.2	Moderately_Enriched	Genome_G4	Poikilotherm	67.8917	291051
MA0741.1	Highly_Reduced	Promoter_Free	Homeotherm	84.7316	12695776
MA0741.1	Highly_Reduced	Promoter_Free	Poikilotherm	83.7957	1105621
MA0741.1	Highly_Reduced	Promoter_G4	Homeotherm	89.3058	2755120
MA0741.1	Highly_Reduced	Promoter_G4	Poikilotherm	90.1431	569294
MA0745.3	Highly_Enriched	Promoter_Free	Homeotherm	65.9567	1613995
MA0745.3	Highly_Enriched	Promoter_Free	Poikilotherm	65.2892	244760
MA0745.3	Highly_Enriched	Promoter_G4	Homeotherm	70.6007	80017
MA0745.3	Highly_Enriched	Promoter_G4	Poikilotherm	70.197	11935
MA0747.2	Highly_Reduced	Promoter_Free	Homeotherm	81.9205	11552408
MA0747.2	Highly_Reduced	Promoter_Free	Poikilotherm	81.367	998193
MA0747.2	Highly_Reduced	Promoter_G4	Homeotherm	87.9926	2527020
MA0747.2	Highly_Reduced	Promoter_G4	Poikilotherm	89.1754	546754
MA0749.2	Moderately_Reduced	Genome_Free	Homeotherm	41.7974	41445
MA0749.2	Moderately_Reduced	Genome_Free	Poikilotherm	43.0314	21542
MA0749.2	Moderately_Reduced	Genome_G4	Homeotherm	55.7277	11490
MA0749.2	Moderately_Reduced	Genome_G4	Poikilotherm	53.9091	5892
MA0753.3	Highly_Reduced	Promoter_Free	Homeotherm	85.1975	13705570
MA0753.3	Highly_Reduced	Promoter_Free	Poikilotherm	85.0575	1641635
MA0753.3	Highly_Reduced	Promoter_G4	Homeotherm	89.464	4166911
MA0753.3	Highly_Reduced	Promoter_G4	Poikilotherm	90.2332	1107414
MA0763.2	Highly_Reduced	Genome_Free	Homeotherm	50.157	163852
MA0763.2	Highly_Reduced	Genome_Free	Poikilotherm	52.6757	80126
MA0763.2	Highly_Reduced	Genome_G4	Homeotherm	62.9918	148034
MA0763.2	Highly_Reduced	Genome_G4	Poikilotherm	61.0478	59092
MA0764.4	Highly_Reduced	Promoter_Free	Homeotherm	63.5729	604535
MA0764.4	Highly_Reduced	Promoter_Free	Poikilotherm	62.1615	108620
MA0764.4	Highly_Reduced	Promoter_G4	Homeotherm	69.1448	34851
MA0764.4	Highly_Reduced	Promoter_G4	Poikilotherm	67.1487	4086
MA0765.4	Highly_Reduced	Promoter_Free	Homeotherm	65.1512	545994
MA0765.4	Highly_Reduced	Promoter_Free	Poikilotherm	63.6302	97531
MA0765.4	Highly_Reduced	Promoter_G4	Homeotherm	69.0721	34116
MA0765.4	Highly_Reduced	Promoter_G4	Poikilotherm	67.335	3944
MA0765.4	Moderately_Enriched	Genome_Free	Homeotherm	61.6572	90934
MA0765.4	Moderately_Enriched	Genome_Free	Poikilotherm	61.5867	57751
MA0765.4	Moderately_Enriched	Genome_G4	Homeotherm	68.3918	174896
MA0765.4	Moderately_Enriched	Genome_G4	Poikilotherm	67.0508	64805
MA0779.2	Highly_Enriched	Genome_Free	Homeotherm	52.8264	128548
MA0779.2	Highly_Enriched	Genome_Free	Poikilotherm	53.3246	58483
MA0779.2	Highly_Enriched	Genome_G4	Homeotherm	69.8995	185030
MA0779.2	Highly_Enriched	Genome_G4	Poikilotherm	68.3587	55495
MA0781.2	Highly_Enriched	Genome_Free	Homeotherm	53.8019	126436
MA0781.2	Highly_Enriched	Genome_Free	Poikilotherm	54.2084	58904
MA0781.2	Highly_Enriched	Genome_G4	Homeotherm	71.0337	188150
MA0781.2	Highly_Enriched	Genome_G4	Poikilotherm	68.9565	60568
MA0781.2	Moderately_Reduced	Promoter_Free	Homeotherm	64.4679	474407
MA0781.2	Moderately_Reduced	Promoter_Free	Poikilotherm	60.2357	83156
MA0781.2	Moderately_Reduced	Promoter_G4	Homeotherm	77.6057	24163
MA0781.2	Moderately_Reduced	Promoter_G4	Poikilotherm	73.5299	2604
MA0798.3	Highly_Reduced	Genome_Free	Homeotherm	45.1229	206728
MA0798.3	Highly_Reduced	Genome_Free	Poikilotherm	47.013	88297
MA0798.3	Highly_Reduced	Genome_G4	Homeotherm	61.0423	146869
MA0798.3	Highly_Reduced	Genome_G4	Poikilotherm	60.2888	49046
MA0799.3	Moderately_Reduced	Genome_Free	Homeotherm	53.5836	273463
MA0799.3	Moderately_Reduced	Genome_Free	Poikilotherm	54.2833	127015
MA0799.3	Moderately_Reduced	Genome_G4	Homeotherm	65.9515	216842
MA0799.3	Moderately_Reduced	Genome_G4	Poikilotherm	63.9081	87375
MA0801.1	Moderately_Enriched	Promoter_Free	Homeotherm	53.1292	764188
MA0801.1	Moderately_Enriched	Promoter_Free	Poikilotherm	52.367	116973
MA0801.1	Moderately_Enriched	Promoter_G4	Homeotherm	58.9503	24486
MA0801.1	Moderately_Enriched	Promoter_G4	Poikilotherm	58.2598	4302
MA0803.1	Moderately_Enriched	Genome_Free	Homeotherm	53.6722	487605
MA0803.1	Moderately_Enriched	Genome_Free	Poikilotherm	53.3657	161551
MA0803.1	Moderately_Enriched	Genome_G4	Homeotherm	60.7212	1064280
MA0803.1	Moderately_Enriched	Genome_G4	Poikilotherm	60.279	270762
MA0807.1	Moderately_Enriched	Promoter_Free	Homeotherm	53.9484	932948
MA0807.1	Moderately_Enriched	Promoter_Free	Poikilotherm	53.4947	157464
MA0807.1	Moderately_Enriched	Promoter_G4	Homeotherm	59.3138	40140
MA0807.1	Moderately_Enriched	Promoter_G4	Poikilotherm	58.9098	6948
MA0809.3	Moderately_Enriched	Genome_Free	Homeotherm	36.9625	703977
MA0809.3	Moderately_Enriched	Genome_Free	Poikilotherm	37.4512	220315
MA0809.3	Moderately_Enriched	Genome_G4	Homeotherm	44.7419	343702
MA0809.3	Moderately_Enriched	Genome_G4	Poikilotherm	44.9418	145689
MA0812.2	Moderately_Enriched	Promoter_Free	Homeotherm	88.7128	3343561
MA0812.2	Moderately_Enriched	Promoter_Free	Poikilotherm	86.1674	392267
MA0812.2	Moderately_Enriched	Promoter_G4	Homeotherm	91.9633	579612
MA0812.2	Moderately_Enriched	Promoter_G4	Poikilotherm	89.5568	53408
MA0814.3	Moderately_Enriched	Promoter_Free	Homeotherm	83.0897	3300886
MA0814.3	Moderately_Enriched	Promoter_Free	Poikilotherm	81.69	371824
MA0814.3	Moderately_Enriched	Promoter_G4	Homeotherm	88.0922	455028
MA0814.3	Moderately_Enriched	Promoter_G4	Poikilotherm	86.3749	44731
MA0821.2	Moderately_Enriched	Promoter_Free	Homeotherm	78.0213	1120508
MA0821.2	Moderately_Enriched	Promoter_Free	Poikilotherm	75.574	152298
MA0821.2	Moderately_Enriched	Promoter_G4	Homeotherm	85.435	97388
MA0821.2	Moderately_Enriched	Promoter_G4	Poikilotherm	82.389	10359
MA0823.1	Moderately_Enriched	Genome_Free	Homeotherm	66.8863	245658
MA0823.1	Moderately_Enriched	Genome_Free	Poikilotherm	67.0298	82793
MA0823.1	Moderately_Enriched	Genome_G4	Homeotherm	74.7477	430374
MA0823.1	Moderately_Enriched	Genome_G4	Poikilotherm	74.4801	125819
MA0831.3	Moderately_Reduced	Promoter_Free	Homeotherm	58.5203	682506
MA0831.3	Moderately_Reduced	Promoter_Free	Poikilotherm	54.9681	174909
MA0831.3	Moderately_Reduced	Promoter_G4	Homeotherm	65.2428	24596
MA0831.3	Moderately_Reduced	Promoter_G4	Poikilotherm	62.9251	4342
MA0837.3	Moderately_Reduced	Promoter_Free	Homeotherm	38.588	212356
MA0837.3	Moderately_Reduced	Promoter_Free	Poikilotherm	38.2761	63225
MA0837.3	Moderately_Reduced	Promoter_G4	Homeotherm	47.0985	1266
MA0837.3	Moderately_Reduced	Promoter_G4	Poikilotherm	47.5226	315
MA0857.1	Moderately_Enriched	Promoter_Free	Homeotherm	49.2409	1085450
MA0857.1	Moderately_Enriched	Promoter_Free	Poikilotherm	47.7984	162124
MA0857.1	Moderately_Enriched	Promoter_G4	Homeotherm	62.6589	29779
MA0857.1	Moderately_Enriched	Promoter_G4	Poikilotherm	61.8226	5059
MA0858.1	Highly_Enriched	Genome_Free	Homeotherm	47.1409	291950
MA0858.1	Highly_Enriched	Genome_Free	Poikilotherm	46.8861	105145
MA0858.1	Highly_Enriched	Genome_G4	Homeotherm	63.806	470035
MA0858.1	Highly_Enriched	Genome_G4	Poikilotherm	62.5429	137012
MA0863.1	Highly_Enriched	Genome_Free	Homeotherm	53.4239	226035
MA0863.1	Highly_Enriched	Genome_Free	Poikilotherm	53.147	101055
MA0863.1	Highly_Enriched	Genome_G4	Homeotherm	68.9144	279901
MA0863.1	Highly_Enriched	Genome_G4	Poikilotherm	66.4596	104014
MA1099.3	Moderately_Enriched	Genome_Free	Homeotherm	73.433	144292
MA1099.3	Moderately_Enriched	Genome_Free	Poikilotherm	74.4741	52208
MA1099.3	Moderately_Enriched	Genome_G4	Homeotherm	84.0155	394479
MA1099.3	Moderately_Enriched	Genome_G4	Poikilotherm	81.4017	98803
MA1099.3	Moderately_Enriched	Promoter_Free	Homeotherm	83.5924	975655
MA1099.3	Moderately_Enriched	Promoter_Free	Poikilotherm	80.4023	137081
MA1099.3	Moderately_Enriched	Promoter_G4	Homeotherm	89.5352	112357
MA1099.3	Moderately_Enriched	Promoter_G4	Poikilotherm	86.2653	10244
MA1100.3	Highly_Enriched	Genome_Free	Homeotherm	70.4725	936392
MA1100.3	Highly_Enriched	Genome_Free	Poikilotherm	70.4682	434568
MA1100.3	Highly_Enriched	Genome_G4	Homeotherm	73.1358	1356649
MA1100.3	Highly_Enriched	Genome_G4	Poikilotherm	72.817	513058
MA1114.2	Moderately_Enriched	Promoter_Free	Homeotherm	55.1931	1224124
MA1114.2	Moderately_Enriched	Promoter_Free	Poikilotherm	53.9292	222913
MA1114.2	Moderately_Enriched	Promoter_G4	Homeotherm	65.0206	49375
MA1114.2	Moderately_Enriched	Promoter_G4	Poikilotherm	63.1964	9324
MA1117.2	Highly_Reduced	Promoter_Free	Homeotherm	57.1429	465381
MA1117.2	Highly_Reduced	Promoter_Free	Poikilotherm	57.1429	116875
MA1117.2	Highly_Reduced	Promoter_G4	Homeotherm	57.1429	62446
MA1117.2	Highly_Reduced	Promoter_G4	Poikilotherm	57.1429	15610
MA1120.2	Moderately_Reduced	Genome_Free	Homeotherm	42.8571	379324
MA1120.2	Moderately_Reduced	Genome_Free	Poikilotherm	42.8571	161823
MA1120.2	Moderately_Reduced	Genome_G4	Homeotherm	42.8571	182141
MA1120.2	Moderately_Reduced	Genome_G4	Poikilotherm	42.8571	85584
MA1125.2	Highly_Enriched	Genome_Free	Homeotherm	1.02433	7444922
MA1125.2	Highly_Enriched	Genome_Free	Poikilotherm	1.68806	1438262
MA1125.2	Highly_Enriched	Genome_G4	Homeotherm	3.04307	494687
MA1125.2	Highly_Enriched	Genome_G4	Poikilotherm	3.35867	306052
MA1125.2	Moderately_Enriched	Promoter_Free	Homeotherm	0.960289	9608121
MA1125.2	Moderately_Enriched	Promoter_Free	Poikilotherm	1.67118	1324656
MA1125.2	Moderately_Enriched	Promoter_G4	Homeotherm	2.50934	18963
MA1125.2	Moderately_Enriched	Promoter_G4	Poikilotherm	3.18167	6950
MA1466.2	Highly_Reduced	Genome_Free	Homeotherm	53.0355	134157
MA1466.2	Highly_Reduced	Genome_Free	Poikilotherm	53.6272	56033
MA1466.2	Highly_Reduced	Genome_G4	Homeotherm	67.4277	105441
MA1466.2	Highly_Reduced	Genome_G4	Poikilotherm	66.3095	37666
MA1472.3	Highly_Enriched	Genome_Free	Homeotherm	65.8628	1050236
MA1472.3	Highly_Enriched	Genome_Free	Poikilotherm	65.7458	482990
MA1472.3	Highly_Enriched	Genome_G4	Homeotherm	70.4734	1534512
MA1472.3	Highly_Enriched	Genome_G4	Poikilotherm	70.4578	567946
MA1474.2	Highly_Enriched	Promoter_Free	Homeotherm	69.0185	583210
MA1474.2	Highly_Enriched	Promoter_Free	Poikilotherm	66.7365	98985
MA1474.2	Highly_Enriched	Promoter_G4	Homeotherm	79.9086	47706
MA1474.2	Highly_Enriched	Promoter_G4	Poikilotherm	78.5312	5288
MA1474.2	Moderately_Enriched	Genome_Free	Homeotherm	63.0312	186732
MA1474.2	Moderately_Enriched	Genome_Free	Poikilotherm	62.9638	71983
MA1474.2	Moderately_Enriched	Genome_G4	Homeotherm	74.8776	327921
MA1474.2	Moderately_Enriched	Genome_G4	Poikilotherm	75.273	104229
MA1483.3	Highly_Reduced	Genome_Free	Homeotherm	49.1856	249563
MA1483.3	Highly_Reduced	Genome_Free	Poikilotherm	50.3677	110395
MA1483.3	Highly_Reduced	Genome_G4	Homeotherm	61.6581	231664
MA1483.3	Highly_Reduced	Genome_G4	Poikilotherm	61.5834	83339
MA1484.2	Highly_Reduced	Genome_Free	Homeotherm	54.7829	190849
MA1484.2	Highly_Reduced	Genome_Free	Poikilotherm	56.7753	97691
MA1484.2	Highly_Reduced	Genome_G4	Homeotherm	63.6222	182869
MA1484.2	Highly_Reduced	Genome_G4	Poikilotherm	62.9261	70561
MA1485.1	Moderately_Enriched	Genome_Free	Homeotherm	59.9654	509974
MA1485.1	Moderately_Enriched	Genome_Free	Poikilotherm	60.2848	229854
MA1485.1	Moderately_Enriched	Genome_G4	Homeotherm	72.8544	849265
MA1485.1	Moderately_Enriched	Genome_G4	Poikilotherm	72.7784	306110
MA1513.2	Moderately_Enriched	Promoter_Free	Homeotherm	97.5086	5728779
MA1513.2	Moderately_Enriched	Promoter_Free	Poikilotherm	96.8831	544274
MA1513.2	Moderately_Enriched	Promoter_G4	Homeotherm	98.2264	2522154
MA1513.2	Moderately_Enriched	Promoter_G4	Poikilotherm	97.9096	229668
MA1516.2	Moderately_Enriched	Promoter_Free	Homeotherm	86.6314	3155801
MA1516.2	Moderately_Enriched	Promoter_Free	Poikilotherm	83.5871	334439
MA1516.2	Moderately_Enriched	Promoter_G4	Homeotherm	91.9138	937863
MA1516.2	Moderately_Enriched	Promoter_G4	Poikilotherm	89.2095	82082
MA1523.2	Highly_Enriched	Promoter_Free	Homeotherm	57.1429	569708
MA1523.2	Highly_Enriched	Promoter_Free	Poikilotherm	57.1429	111439
MA1523.2	Highly_Enriched	Promoter_G4	Homeotherm	57.1429	21008
MA1523.2	Highly_Enriched	Promoter_G4	Poikilotherm	57.1429	4950
MA1524.3	Moderately_Enriched	Genome_Free	Homeotherm	43.5759	648029
MA1524.3	Moderately_Enriched	Genome_Free	Poikilotherm	44.6035	225684
MA1524.3	Moderately_Enriched	Genome_G4	Homeotherm	54.44	325011
MA1524.3	Moderately_Enriched	Genome_G4	Poikilotherm	54.7564	153606
MA1528.2	Highly_Enriched	Promoter_Free	Homeotherm	70.5526	1746682
MA1528.2	Highly_Enriched	Promoter_Free	Poikilotherm	66.681	310070
MA1528.2	Highly_Enriched	Promoter_G4	Homeotherm	81.831	146438
MA1528.2	Highly_Enriched	Promoter_G4	Poikilotherm	78.1509	20297
MA1529.2	Moderately_Enriched	Genome_Free	Homeotherm	60.1646	544767
MA1529.2	Moderately_Enriched	Genome_Free	Poikilotherm	59.8308	221016
MA1529.2	Moderately_Enriched	Genome_G4	Homeotherm	71.889	1300174
MA1529.2	Moderately_Enriched	Genome_G4	Poikilotherm	71.3176	406083
MA1531.2	Moderately_Reduced	Promoter_Free	Homeotherm	61.9475	1061937
MA1531.2	Moderately_Reduced	Promoter_Free	Poikilotherm	60.3476	190335
MA1531.2	Moderately_Reduced	Promoter_G4	Homeotherm	74.3086	119928
MA1531.2	Moderately_Reduced	Promoter_G4	Poikilotherm	71.8629	25222
MA1532.2	Highly_Reduced	Promoter_Free	Homeotherm	57.0684	885890
MA1532.2	Highly_Reduced	Promoter_Free	Poikilotherm	55.429	174763
MA1532.2	Highly_Reduced	Promoter_G4	Homeotherm	70.8712	69336
MA1532.2	Highly_Reduced	Promoter_G4	Poikilotherm	68.6328	18103
MA1532.2	Moderately_Reduced	Genome_Free	Homeotherm	50.3576	362459
MA1532.2	Moderately_Reduced	Genome_Free	Poikilotherm	50.752	131103
MA1532.2	Moderately_Reduced	Genome_G4	Homeotherm	68.1879	1383542
MA1532.2	Moderately_Reduced	Genome_G4	Poikilotherm	66.7547	701400
MA1533.2	Highly_Enriched	Promoter_Free	Homeotherm	62.4967	759360
MA1533.2	Highly_Enriched	Promoter_Free	Poikilotherm	57.6504	142543
MA1533.2	Highly_Enriched	Promoter_G4	Homeotherm	80.1166	83057
MA1533.2	Highly_Enriched	Promoter_G4	Poikilotherm	76.1716	9545
MA1544.2	Moderately_Reduced	Genome_Free	Homeotherm	41.9236	46988
MA1544.2	Moderately_Reduced	Genome_Free	Poikilotherm	42.637	27471
MA1544.2	Moderately_Reduced	Genome_G4	Homeotherm	47.3602	17942
MA1544.2	Moderately_Reduced	Genome_G4	Poikilotherm	47.8853	8409
MA1545.2	Moderately_Reduced	Genome_Free	Homeotherm	42.8571	33765
MA1545.2	Moderately_Reduced	Genome_Free	Poikilotherm	42.8571	19025
MA1545.2	Moderately_Reduced	Genome_G4	Homeotherm	42.8571	11715
MA1545.2	Moderately_Reduced	Genome_G4	Poikilotherm	42.8571	5485
MA1547.2	Moderately_Enriched	Promoter_Free	Homeotherm	36.1694	540916
MA1547.2	Moderately_Enriched	Promoter_Free	Poikilotherm	36.2046	97603
MA1547.2	Moderately_Enriched	Promoter_G4	Homeotherm	42.7497	12834
MA1547.2	Moderately_Enriched	Promoter_G4	Poikilotherm	41.8458	3203
MA1553.2	Moderately_Enriched	Promoter_Free	Homeotherm	54.9187	672577
MA1553.2	Moderately_Enriched	Promoter_Free	Poikilotherm	53.3314	99993
MA1553.2	Moderately_Enriched	Promoter_G4	Homeotherm	70.7935	21932
MA1553.2	Moderately_Enriched	Promoter_G4	Poikilotherm	68.481	3132
MA1554.2	Moderately_Reduced	Genome_Free	Homeotherm	50.5926	267392
MA1554.2	Moderately_Reduced	Genome_Free	Poikilotherm	51.786	119399
MA1554.2	Moderately_Reduced	Genome_G4	Homeotherm	59.7519	161143
MA1554.2	Moderately_Reduced	Genome_G4	Poikilotherm	59.0453	51430
MA1555.1	Highly_Reduced	Genome_Free	Homeotherm	53.346	422878
MA1555.1	Highly_Reduced	Genome_Free	Poikilotherm	54.0574	104438
MA1555.1	Highly_Reduced	Genome_G4	Homeotherm	69.3933	539634
MA1555.1	Highly_Reduced	Genome_G4	Poikilotherm	68.9785	253201
MA1558.2	Highly_Enriched	Promoter_Free	Homeotherm	65.5479	1579951
MA1558.2	Highly_Enriched	Promoter_Free	Poikilotherm	65.2019	245987
MA1558.2	Highly_Enriched	Promoter_G4	Homeotherm	68.1871	75484
MA1558.2	Highly_Enriched	Promoter_G4	Poikilotherm	67.8341	11471
MA1559.2	Moderately_Enriched	Promoter_Free	Homeotherm	62.9999	1537362
MA1559.2	Moderately_Enriched	Promoter_Free	Poikilotherm	61.8127	242577
MA1559.2	Moderately_Enriched	Promoter_G4	Homeotherm	69.9412	70251
MA1559.2	Moderately_Enriched	Promoter_G4	Poikilotherm	69.2487	10674
MA1564.2	Highly_Reduced	Promoter_Free	Homeotherm	87.2861	11566291
MA1564.2	Highly_Reduced	Promoter_Free	Poikilotherm	86.9721	831054
MA1564.2	Highly_Reduced	Promoter_G4	Homeotherm	91.6597	2665738
MA1564.2	Highly_Reduced	Promoter_G4	Poikilotherm	93.2042	542697
MA1576.2	Moderately_Enriched	Genome_Free	Homeotherm	50.623	370505
MA1576.2	Moderately_Enriched	Genome_Free	Poikilotherm	50.728	120864
MA1576.2	Moderately_Enriched	Genome_G4	Homeotherm	66.2974	795061
MA1576.2	Moderately_Enriched	Genome_G4	Poikilotherm	66.3021	227192
MA1580.1	Moderately_Reduced	Promoter_Free	Homeotherm	33.6121	532027
MA1580.1	Moderately_Reduced	Promoter_Free	Poikilotherm	32.6979	174969
MA1580.1	Moderately_Reduced	Promoter_G4	Homeotherm	42.9971	1316
MA1580.1	Moderately_Reduced	Promoter_G4	Poikilotherm	40.3383	901
MA1583.2	Highly_Enriched	Genome_Free	Homeotherm	75.679	85283
MA1583.2	Highly_Enriched	Genome_Free	Poikilotherm	76.0347	57070
MA1583.2	Highly_Enriched	Genome_G4	Homeotherm	79.1862	176803
MA1583.2	Highly_Enriched	Genome_G4	Poikilotherm	77.6205	78942
MA1585.2	Moderately_Enriched	Promoter_Free	Homeotherm	49.4855	464491
MA1585.2	Moderately_Enriched	Promoter_Free	Poikilotherm	49.9789	95469
MA1585.2	Moderately_Enriched	Promoter_G4	Homeotherm	57.2821	10721
MA1585.2	Moderately_Enriched	Promoter_G4	Poikilotherm	57.0737	3066
MA1589.3	Moderately_Reduced	Genome_Free	Homeotherm	47.7786	272841
MA1589.3	Moderately_Reduced	Genome_Free	Poikilotherm	48.7466	109835
MA1589.3	Moderately_Reduced	Genome_G4	Homeotherm	60.4645	524966
MA1589.3	Moderately_Reduced	Genome_G4	Poikilotherm	60.8459	237911
MA1602.2	Highly_Reduced	Genome_Free	Homeotherm	48.3003	189261
MA1602.2	Highly_Reduced	Genome_Free	Poikilotherm	48.0643	123791
MA1602.2	Highly_Reduced	Genome_G4	Homeotherm	61.1614	198712
MA1602.2	Highly_Reduced	Genome_G4	Poikilotherm	58.9828	40176
MA1602.2	Moderately_Reduced	Promoter_Free	Homeotherm	54.3763	339310
MA1602.2	Moderately_Reduced	Promoter_Free	Poikilotherm	50.8044	85375
MA1602.2	Moderately_Reduced	Promoter_G4	Homeotherm	65.871	8371
MA1602.2	Moderately_Reduced	Promoter_G4	Poikilotherm	62.0423	1035
MA1619.2	Moderately_Reduced	Genome_Free	Homeotherm	60.6366	912341
MA1619.2	Moderately_Reduced	Genome_Free	Poikilotherm	61.2206	421737
MA1619.2	Moderately_Reduced	Genome_G4	Homeotherm	63.8211	679680
MA1619.2	Moderately_Reduced	Genome_G4	Poikilotherm	64.5977	252034
MA1625.2	Highly_Enriched	Genome_Free	Homeotherm	42.922	972915
MA1625.2	Highly_Enriched	Genome_Free	Poikilotherm	44.6705	273674
MA1625.2	Highly_Enriched	Genome_G4	Homeotherm	51.4571	570562
MA1625.2	Highly_Enriched	Genome_G4	Poikilotherm	51.8267	237177
MA1630.3	Moderately_Enriched	Genome_Free	Homeotherm	75.4617	1102650
MA1630.3	Moderately_Enriched	Genome_Free	Poikilotherm	76.8996	510445
MA1630.3	Moderately_Enriched	Genome_G4	Homeotherm	86.5501	28589019
MA1630.3	Moderately_Enriched	Genome_G4	Poikilotherm	86.9228	5391099
MA1630.3	Moderately_Reduced	Promoter_Free	Homeotherm	83.74	16326296
MA1630.3	Moderately_Reduced	Promoter_Free	Poikilotherm	82.6832	1605743
MA1630.3	Moderately_Reduced	Promoter_G4	Homeotherm	87.6786	4501695
MA1630.3	Moderately_Reduced	Promoter_G4	Poikilotherm	88.1109	974911
MA1632.2	Moderately_Enriched	Genome_Free	Homeotherm	39.0793	496651
MA1632.2	Moderately_Enriched	Genome_Free	Poikilotherm	38.699	141792
MA1632.2	Moderately_Enriched	Genome_G4	Homeotherm	47.741	126112
MA1632.2	Moderately_Enriched	Genome_G4	Poikilotherm	46.0452	44982
MA1641.2	Highly_Reduced	Genome_Free	Homeotherm	62.5542	770132
MA1641.2	Highly_Reduced	Genome_Free	Poikilotherm	62.9695	367360
MA1641.2	Highly_Reduced	Genome_G4	Homeotherm	64.4822	648602
MA1641.2	Highly_Reduced	Genome_G4	Poikilotherm	65.2936	240936
MA1645.2	Highly_Enriched	Promoter_Free	Homeotherm	55.6498	881963
MA1645.2	Highly_Enriched	Promoter_Free	Poikilotherm	55.3969	160145
MA1645.2	Highly_Enriched	Promoter_G4	Homeotherm	60.5055	39427
MA1645.2	Highly_Enriched	Promoter_G4	Poikilotherm	60.168	8025
MA1653.2	Moderately_Reduced	Promoter_Free	Homeotherm	85.5524	16489139
MA1653.2	Moderately_Reduced	Promoter_Free	Poikilotherm	84.1784	1484200
MA1653.2	Moderately_Reduced	Promoter_G4	Homeotherm	88.3885	4230516
MA1653.2	Moderately_Reduced	Promoter_G4	Poikilotherm	89.3588	806202
MA1654.2	Moderately_Reduced	Promoter_Free	Homeotherm	62.2006	2041078
MA1654.2	Moderately_Reduced	Promoter_Free	Poikilotherm	59.9041	345281
MA1654.2	Moderately_Reduced	Promoter_G4	Homeotherm	72.3086	155416
MA1654.2	Moderately_Reduced	Promoter_G4	Poikilotherm	70.6848	26188
MA1712.2	Highly_Enriched	Promoter_Free	Homeotherm	80.757	6718920
MA1712.2	Highly_Enriched	Promoter_Free	Poikilotherm	77.5824	626802
MA1712.2	Highly_Enriched	Promoter_G4	Homeotherm	85.863	1119858
MA1712.2	Highly_Enriched	Promoter_G4	Poikilotherm	83.1948	91247
MA1713.2	Moderately_Enriched	Promoter_Free	Homeotherm	86.3829	3864709
MA1713.2	Moderately_Enriched	Promoter_Free	Poikilotherm	84.2348	458344
MA1713.2	Moderately_Enriched	Promoter_G4	Homeotherm	89.0412	884960
MA1713.2	Moderately_Enriched	Promoter_G4	Poikilotherm	87.4629	85149
MA1714.2	Highly_Reduced	Promoter_Free	Homeotherm	51.0706	1312764
MA1714.2	Highly_Reduced	Promoter_Free	Poikilotherm	50.4845	260777
MA1714.2	Highly_Reduced	Promoter_G4	Homeotherm	63.8943	85570
MA1714.2	Highly_Reduced	Promoter_G4	Poikilotherm	63.1963	16811
MA1721.2	Moderately_Enriched	Promoter_Free	Homeotherm	83.0778	7705956
MA1721.2	Moderately_Enriched	Promoter_Free	Poikilotherm	78.1362	927972
MA1721.2	Moderately_Enriched	Promoter_G4	Homeotherm	89.2358	1153049
MA1721.2	Moderately_Enriched	Promoter_G4	Poikilotherm	86.1247	100534
MA1725.2	Moderately_Enriched	Genome_Free	Homeotherm	54.3811	815074
MA1725.2	Moderately_Enriched	Genome_Free	Poikilotherm	55.03	311708
MA1725.2	Moderately_Enriched	Genome_G4	Homeotherm	59.9525	1200262
MA1725.2	Moderately_Enriched	Genome_G4	Poikilotherm	59.1633	449117
MA1727.2	Moderately_Enriched	Genome_Free	Homeotherm	73.5653	319915
MA1727.2	Moderately_Enriched	Genome_Free	Poikilotherm	74.0682	166934
MA1727.2	Moderately_Enriched	Genome_G4	Homeotherm	75.2585	628005
MA1727.2	Moderately_Enriched	Genome_G4	Poikilotherm	75.8477	227955
MA1938.2	Moderately_Enriched	Genome_Free	Homeotherm	56.9691	381140
MA1938.2	Moderately_Enriched	Genome_Free	Poikilotherm	57.2996	174132
MA1938.2	Moderately_Enriched	Genome_G4	Homeotherm	70.6944	654489
MA1938.2	Moderately_Enriched	Genome_G4	Poikilotherm	68.8732	239481
MA1946.2	Highly_Enriched	Genome_Free	Homeotherm	45.4792	556891
MA1946.2	Highly_Enriched	Genome_Free	Poikilotherm	46.2129	192449
MA1946.2	Highly_Enriched	Genome_G4	Homeotherm	58.2194	687907
MA1946.2	Highly_Enriched	Genome_G4	Poikilotherm	57.3533	203571
MA1967.2	Highly_Enriched	Genome_Free	Homeotherm	56.2766	591019
MA1967.2	Highly_Enriched	Genome_Free	Poikilotherm	56.2242	266891
MA1967.2	Highly_Enriched	Genome_G4	Homeotherm	67.0955	744814
MA1967.2	Highly_Enriched	Genome_G4	Poikilotherm	66.5514	284263
MA1977.2	Moderately_Enriched	Genome_Free	Homeotherm	49.363	539575
MA1977.2	Moderately_Enriched	Genome_Free	Poikilotherm	48.931	185760
MA1977.2	Moderately_Enriched	Genome_G4	Homeotherm	62.5945	982548
MA1977.2	Moderately_Enriched	Genome_G4	Poikilotherm	62.1868	290159
MA1979.2	Highly_Enriched	Promoter_Free	Homeotherm	63.1523	1673249
MA1979.2	Highly_Enriched	Promoter_Free	Poikilotherm	61.6114	252011
MA1979.2	Highly_Enriched	Promoter_G4	Homeotherm	68.0728	63621
MA1979.2	Highly_Enriched	Promoter_G4	Poikilotherm	67.1288	10895
MA1983.2	Highly_Enriched	Genome_Free	Homeotherm	42.8271	387050
MA1983.2	Highly_Enriched	Genome_Free	Poikilotherm	43.5331	151227
MA1983.2	Highly_Enriched	Genome_G4	Homeotherm	62.0551	243793
MA1983.2	Highly_Enriched	Genome_G4	Poikilotherm	59.9983	129849
MA1987.2	Highly_Reduced	Promoter_Free	Homeotherm	69.4695	12678030
MA1987.2	Highly_Reduced	Promoter_Free	Poikilotherm	68.5108	1065542
MA1987.2	Highly_Reduced	Promoter_G4	Homeotherm	78.5382	1600237
MA1987.2	Highly_Reduced	Promoter_G4	Poikilotherm	78.4569	268533
MA1998.2	Moderately_Enriched	Promoter_Free	Homeotherm	49.9438	613510
MA1998.2	Moderately_Enriched	Promoter_Free	Poikilotherm	51.0537	89676
MA1998.2	Moderately_Enriched	Promoter_G4	Homeotherm	57.485	14364
MA1998.2	Moderately_Enriched	Promoter_G4	Poikilotherm	56.5968	2853
MA2094.1	Highly_Enriched	Genome_Free	Homeotherm	56.63	99868
MA2094.1	Highly_Enriched	Genome_Free	Poikilotherm	56.8232	44804
MA2094.1	Highly_Enriched	Genome_G4	Homeotherm	73.3361	169063
MA2094.1	Highly_Enriched	Genome_G4	Poikilotherm	70.4872	53507
MA2102.1	Moderately_Reduced	Genome_Free	Homeotherm	34.4923	64918
MA2102.1	Moderately_Reduced	Genome_Free	Poikilotherm	34.1821	38770
MA2102.1	Moderately_Reduced	Genome_G4	Homeotherm	36.2089	8302
MA2102.1	Moderately_Reduced	Genome_G4	Poikilotherm	35.7656	4306
MA2102.1	Moderately_Reduced	Promoter_Free	Homeotherm	34.7287	86144
MA2102.1	Moderately_Reduced	Promoter_Free	Poikilotherm	34.1803	28768
MA2102.1	Moderately_Reduced	Promoter_G4	Homeotherm	36.3781	516
MA2102.1	Moderately_Reduced	Promoter_G4	Poikilotherm	37.2533	156
MA2328.1	Moderately_Enriched	Promoter_Free	Homeotherm	91.8343	7241200
MA2328.1	Moderately_Enriched	Promoter_Free	Poikilotherm	90.3573	730011
MA2328.1	Moderately_Enriched	Promoter_G4	Homeotherm	93.4873	2213781
MA2328.1	Moderately_Enriched	Promoter_G4	Poikilotherm	92.8861	215698
MA2340.1	Moderately_Enriched	Promoter_Free	Homeotherm	67.3475	893349
MA2340.1	Moderately_Enriched	Promoter_Free	Poikilotherm	65.3014	147449
MA2340.1	Moderately_Enriched	Promoter_G4	Homeotherm	72.1862	78815
MA2340.1	Moderately_Enriched	Promoter_G4	Poikilotherm	70.5845	8869
MA2489.1	Moderately_Enriched	Genome_Free	Homeotherm	19.2486	3128881
MA2489.1	Moderately_Enriched	Genome_Free	Poikilotherm	23.361	535972
MA2489.1	Moderately_Enriched	Genome_G4	Homeotherm	34.6267	191568
MA2489.1	Moderately_Enriched	Genome_G4	Poikilotherm	34.2164	63111
MA2489.1	Moderately_Enriched	Promoter_Free	Homeotherm	18.2193	6158168
MA2489.1	Moderately_Enriched	Promoter_Free	Poikilotherm	23.3459	751812
MA2489.1	Moderately_Enriched	Promoter_G4	Homeotherm	34.3812	6931
MA2489.1	Moderately_Enriched	Promoter_G4	Poikilotherm	34.4188	1435
MA2490.1	Highly_Enriched	Genome_Free	Homeotherm	43.8599	426033
MA2490.1	Highly_Enriched	Genome_Free	Poikilotherm	44.4091	138787
MA2490.1	Highly_Enriched	Genome_G4	Homeotherm	55.7101	370838
MA2490.1	Highly_Enriched	Genome_G4	Poikilotherm	55.7274	141748
MA2493.1	Moderately_Enriched	Promoter_Free	Homeotherm	62.0712	1191553
MA2493.1	Moderately_Enriched	Promoter_Free	Poikilotherm	60.2413	203617
MA2493.1	Moderately_Enriched	Promoter_G4	Homeotherm	71.2136	37147
MA2493.1	Moderately_Enriched	Promoter_G4	Poikilotherm	69.4625	7255
MA2494.1	Moderately_Reduced	Promoter_Free	Homeotherm	65.1267	3077303
MA2494.1	Moderately_Reduced	Promoter_Free	Poikilotherm	63.0944	474993
MA2494.1	Moderately_Reduced	Promoter_G4	Homeotherm	76.0523	293884
MA2494.1	Moderately_Reduced	Promoter_G4	Poikilotherm	73.8201	45931
MA2503.1	Highly_Enriched	Genome_Free	Homeotherm	64.0893	45842
MA2503.1	Highly_Enriched	Genome_Free	Poikilotherm	64.3983	24310
MA2503.1	Highly_Enriched	Genome_G4	Homeotherm	80.0101	148320
MA2503.1	Highly_Enriched	Genome_G4	Poikilotherm	77.3165	32964
MA2519.1	Highly_Reduced	Promoter_Free	Homeotherm	62.5931	2042155
MA2519.1	Highly_Reduced	Promoter_Free	Poikilotherm	61.2687	254603
MA2519.1	Highly_Reduced	Promoter_G4	Homeotherm	73.267	161033
MA2519.1	Highly_Reduced	Promoter_G4	Poikilotherm	71.2874	20971
MA2524.1	Moderately_Enriched	Promoter_Free	Homeotherm	47.6619	949479
MA2524.1	Moderately_Enriched	Promoter_Free	Poikilotherm	46.6841	172102
MA2524.1	Moderately_Enriched	Promoter_G4	Homeotherm	65.0831	28083
MA2524.1	Moderately_Enriched	Promoter_G4	Poikilotherm	63.6551	5136
MA2528.1	Highly_Enriched	Promoter_Free	Homeotherm	63.0765	2123179
MA2528.1	Highly_Enriched	Promoter_Free	Poikilotherm	60.8886	364680
MA2528.1	Highly_Enriched	Promoter_G4	Homeotherm	74.7635	120348
MA2528.1	Highly_Enriched	Promoter_G4	Poikilotherm	72.5109	20299
MA2531.1	Moderately_Reduced	Promoter_Free	Homeotherm	53.6114	3971823
MA2531.1	Moderately_Reduced	Promoter_Free	Poikilotherm	53.8808	669277
MA2531.1	Moderately_Reduced	Promoter_G4	Homeotherm	66.4501	430681
MA2531.1	Moderately_Reduced	Promoter_G4	Poikilotherm	66.4074	72702
MA2534.1	Moderately_Reduced	Promoter_Free	Homeotherm	61.2721	1165527
MA2534.1	Moderately_Reduced	Promoter_Free	Poikilotherm	60.4997	225831
MA2534.1	Moderately_Reduced	Promoter_G4	Homeotherm	70.1468	96281
MA2534.1	Moderately_Reduced	Promoter_G4	Poikilotherm	68.7214	17336
MA2538.1	Moderately_Enriched	Genome_Free	Homeotherm	85.7808	156081
MA2538.1	Moderately_Enriched	Genome_Free	Poikilotherm	82.9586	88839
MA2538.1	Moderately_Enriched	Genome_G4	Homeotherm	92.3153	3185899
MA2538.1	Moderately_Enriched	Genome_G4	Poikilotherm	90.8483	766806
MA2538.1	Moderately_Enriched	Promoter_Free	Homeotherm	90.0059	5304167
MA2538.1	Moderately_Enriched	Promoter_Free	Poikilotherm	87.3534	506251
MA2538.1	Moderately_Enriched	Promoter_G4	Homeotherm	93.1211	961715
MA2538.1	Moderately_Enriched	Promoter_G4	Poikilotherm	91.649	70001
MA2539.1	Moderately_Enriched	Promoter_Free	Homeotherm	96.2979	6423712
MA2539.1	Moderately_Enriched	Promoter_Free	Poikilotherm	95.0247	614457
MA2539.1	Moderately_Enriched	Promoter_G4	Homeotherm	97.9011	1651928
MA2539.1	Moderately_Enriched	Promoter_G4	Poikilotherm	97.3308	138528
MA2541.1	Moderately_Enriched	Genome_Free	Homeotherm	60.8559	308720
MA2541.1	Moderately_Enriched	Genome_Free	Poikilotherm	61.2263	94924
MA2541.1	Moderately_Enriched	Genome_G4	Homeotherm	72.3983	485292
MA2541.1	Moderately_Enriched	Genome_G4	Poikilotherm	71.7473	134293
MA2545.1	Highly_Enriched	Promoter_Free	Homeotherm	59.0684	1221609
MA2545.1	Highly_Enriched	Promoter_Free	Poikilotherm	57.0221	227625
MA2545.1	Highly_Enriched	Promoter_G4	Homeotherm	69.4729	54335
MA2545.1	Highly_Enriched	Promoter_G4	Poikilotherm	67.2164	11163
MA2553.1	Moderately_Enriched	Genome_Free	Homeotherm	67.5077	200879
MA2553.1	Moderately_Enriched	Genome_Free	Poikilotherm	66.53	79630
MA2553.1	Moderately_Enriched	Genome_G4	Homeotherm	81.0452	1672168
MA2553.1	Moderately_Enriched	Genome_G4	Poikilotherm	78.496	407832
MA2553.1	Moderately_Enriched	Promoter_Free	Homeotherm	78.6916	2446709
MA2553.1	Moderately_Enriched	Promoter_Free	Poikilotherm	74.1608	251586
MA2553.1	Moderately_Enriched	Promoter_G4	Homeotherm	85.1102	282502
MA2553.1	Moderately_Enriched	Promoter_G4	Poikilotherm	81.7038	22480
MA2554.1	Moderately_Enriched	Genome_Free	Homeotherm	29.01	2045656
MA2554.1	Moderately_Enriched	Genome_Free	Poikilotherm	30.643	433552
MA2554.1	Moderately_Enriched	Genome_G4	Homeotherm	47.5889	989419
MA2554.1	Moderately_Enriched	Genome_G4	Poikilotherm	46.7281	201417
MA2569.1	Moderately_Enriched	Genome_Free	Homeotherm	59.4715	165717
MA2569.1	Moderately_Enriched	Genome_Free	Poikilotherm	59.0068	77195
MA2569.1	Moderately_Enriched	Genome_G4	Homeotherm	73.2684	504950
MA2569.1	Moderately_Enriched	Genome_G4	Poikilotherm	71.9244	159438
MA2573.1	Highly_Enriched	Promoter_Free	Homeotherm	70.1731	1127509
MA2573.1	Highly_Enriched	Promoter_Free	Poikilotherm	65.1509	173148
MA2573.1	Highly_Enriched	Promoter_G4	Homeotherm	84.6204	151279
MA2573.1	Highly_Enriched	Promoter_G4	Poikilotherm	80.1353	14536
MA2580.1	Moderately_Enriched	Promoter_Free	Homeotherm	53.1335	660054
MA2580.1	Moderately_Enriched	Promoter_Free	Poikilotherm	51.8482	98269
MA2580.1	Moderately_Enriched	Promoter_G4	Homeotherm	59.03	14202
MA2580.1	Moderately_Enriched	Promoter_G4	Poikilotherm	56.9533	2764
MA2581.1	Moderately_Enriched	Genome_Free	Homeotherm	76.2855	977756
MA2581.1	Moderately_Enriched	Genome_Free	Poikilotherm	76.4268	506573
MA2581.1	Moderately_Enriched	Genome_G4	Homeotherm	77.4121	2779333
MA2581.1	Moderately_Enriched	Genome_G4	Poikilotherm	77.1379	1034577
MA2582.1	Highly_Enriched	Promoter_Free	Homeotherm	56.0837	1009164
MA2582.1	Highly_Enriched	Promoter_Free	Poikilotherm	55.4318	179182
MA2582.1	Highly_Enriched	Promoter_G4	Homeotherm	64.3235	28288
MA2582.1	Highly_Enriched	Promoter_G4	Poikilotherm	63.8642	6480
MA2585.1	Highly_Enriched	Genome_Free	Homeotherm	55.1947	307877
MA2585.1	Highly_Enriched	Genome_Free	Poikilotherm	53.6721	178889
MA2585.1	Highly_Enriched	Genome_G4	Homeotherm	67.4153	756443
MA2585.1	Highly_Enriched	Genome_G4	Poikilotherm	65.8317	218720
MA2588.1	Highly_Enriched	Promoter_Free	Homeotherm	90.832	1625113
MA2588.1	Highly_Enriched	Promoter_Free	Poikilotherm	88.2977	158054
MA2588.1	Highly_Enriched	Promoter_G4	Homeotherm	92.8025	517759
MA2588.1	Highly_Enriched	Promoter_G4	Poikilotherm	91.0888	37771
MA2588.1	Moderately_Enriched	Genome_Free	Homeotherm	84.1733	127850
MA2588.1	Moderately_Enriched	Genome_Free	Poikilotherm	83.9766	58978
MA2588.1	Moderately_Enriched	Genome_G4	Homeotherm	90.0971	2503132
MA2588.1	Moderately_Enriched	Genome_G4	Poikilotherm	88.6305	646925
MA2590.1	Moderately_Reduced	Genome_Free	Homeotherm	49.2386	438269
MA2590.1	Moderately_Reduced	Genome_Free	Poikilotherm	49.7818	172161
MA2590.1	Moderately_Reduced	Genome_G4	Homeotherm	65.0274	365367
MA2590.1	Moderately_Reduced	Genome_G4	Poikilotherm	63.3783	125395
MA2593.1	Moderately_Enriched	Genome_Free	Homeotherm	5.18289	7979047
MA2593.1	Moderately_Enriched	Genome_Free	Poikilotherm	6.19803	1475499
MA2593.1	Moderately_Enriched	Genome_G4	Homeotherm	10.1192	466775
MA2593.1	Moderately_Enriched	Genome_G4	Poikilotherm	9.39132	257202
MA2593.1	Moderately_Enriched	Promoter_Free	Homeotherm	4.9488	11089239
MA2593.1	Moderately_Enriched	Promoter_Free	Poikilotherm	6.11415	1488420
MA2593.1	Moderately_Enriched	Promoter_G4	Homeotherm	10.0129	19088
MA2593.1	Moderately_Enriched	Promoter_G4	Poikilotherm	9.55344	6166
MA2594.1	Moderately_Enriched	Genome_Free	Homeotherm	62.7255	404216
MA2594.1	Moderately_Enriched	Genome_Free	Poikilotherm	62.5592	158026
MA2594.1	Moderately_Enriched	Genome_G4	Homeotherm	73.4126	1078290
MA2594.1	Moderately_Enriched	Genome_G4	Poikilotherm	73.3871	311673
MA2597.1	Highly_Enriched	Promoter_Free	Homeotherm	37.9379	753595
MA2597.1	Highly_Enriched	Promoter_Free	Poikilotherm	38.2312	82237
MA2597.1	Highly_Enriched	Promoter_G4	Homeotherm	45.0589	12068
MA2597.1	Highly_Enriched	Promoter_G4	Poikilotherm	45.8079	2938
MA2601.1	Moderately_Enriched	Genome_Free	Homeotherm	69.5988	305452
MA2601.1	Moderately_Enriched	Genome_Free	Poikilotherm	70.1107	86384
MA2601.1	Moderately_Enriched	Genome_G4	Homeotherm	73.8453	599848
MA2601.1	Moderately_Enriched	Genome_G4	Poikilotherm	73.7459	162024
MA2602.1	Moderately_Enriched	Promoter_Free	Homeotherm	86.4374	1646953
MA2602.1	Moderately_Enriched	Promoter_Free	Poikilotherm	85.0072	212479
MA2602.1	Moderately_Enriched	Promoter_G4	Homeotherm	88.2386	322536
MA2602.1	Moderately_Enriched	Promoter_G4	Poikilotherm	87.0162	30720
MA2628.1	Moderately_Enriched	Genome_Free	Homeotherm	69.5639	139159
MA2628.1	Moderately_Enriched	Genome_Free	Poikilotherm	69.8393	52754
MA2628.1	Moderately_Enriched	Genome_G4	Homeotherm	75.9469	328352
MA2628.1	Moderately_Enriched	Genome_G4	Poikilotherm	75.9133	102331
MA2688.1	Highly_Reduced	Promoter_Free	Homeotherm	63.8627	12176328
MA2688.1	Highly_Reduced	Promoter_Free	Poikilotherm	63.3194	1064919
MA2688.1	Highly_Reduced	Promoter_G4	Homeotherm	74.8785	1580869
MA2688.1	Highly_Reduced	Promoter_G4	Poikilotherm	75.9202	265406
MA2689.1	Moderately_Enriched	Genome_Free	Homeotherm	34.2753	1277430
MA2689.1	Moderately_Enriched	Genome_Free	Poikilotherm	36.0409	326426
MA2689.1	Moderately_Enriched	Genome_G4	Homeotherm	51.2232	429048
MA2689.1	Moderately_Enriched	Genome_G4	Poikilotherm	51.0709	128850

## Sheet: TFBS mean species-wise
Motif_ID	Enrichment_Tier	Thermal_Group	Species	Mean_GC_Promoter	Mean_GC_Genome
MA0024.3	Highly_Enriched	Homeotherm	Amazona_collaria		72.6057
MA0024.3	Highly_Enriched	Homeotherm	Anas_platyrhynchos		74.3548
MA0024.3	Highly_Enriched	Homeotherm	Aotus_nancymaae		73.9335
MA0024.3	Highly_Enriched	Homeotherm	Apteryx_haastii		74.6773
MA0024.3	Highly_Enriched	Homeotherm	Aquila_chrysaetos		73.5907
MA0024.3	Highly_Enriched	Homeotherm	Athene_cunicularia		74.791
MA0024.3	Highly_Enriched	Homeotherm	Balaenoptera_musculus		74.3156
MA0024.3	Highly_Enriched	Homeotherm	Bison_bison		73.723
MA0024.3	Highly_Enriched	Homeotherm	Bos_taurus		74.3651
MA0024.3	Highly_Enriched	Homeotherm	Cairina_moschata		74.7717
MA0024.3	Highly_Enriched	Homeotherm	Calidris_pugnax		74.6538
MA0024.3	Highly_Enriched	Homeotherm	Callithrix_jacchus		73.3561
MA0024.3	Highly_Enriched	Homeotherm	Camelus_dromedarius		73.9513
MA0024.3	Highly_Enriched	Homeotherm	Canis_lupus		74.4493
MA0024.3	Highly_Enriched	Homeotherm	Carlito_syrichta		74.2706
MA0024.3	Highly_Enriched	Homeotherm	Castor_canadensis		69.858
MA0024.3	Highly_Enriched	Homeotherm	Catharus_ustulatus		72.5733
MA0024.3	Highly_Enriched	Homeotherm	Cebus_imitator		73.7901
MA0024.3	Highly_Enriched	Homeotherm	Cercocebus_atys		73.9113
MA0024.3	Highly_Enriched	Homeotherm	Cervus_hanglu		74.7313
MA0024.3	Highly_Enriched	Homeotherm	Choloepus_hoffmanni		73.387
MA0024.3	Highly_Enriched	Homeotherm	Corvus_moneduloides		74.4509
MA0024.3	Highly_Enriched	Homeotherm	Coturnix_japonica		66.784
MA0024.3	Highly_Enriched	Homeotherm	Delphinapterus_leucas		74.4031
MA0024.3	Highly_Enriched	Homeotherm	Echinops_telfairi		72.7813
MA0024.3	Highly_Enriched	Homeotherm	Equus_asinus		74.6407
MA0024.3	Highly_Enriched	Homeotherm	Equus_caballus		74.1728
MA0024.3	Highly_Enriched	Homeotherm	Erinaceus_europaeus		71.7023
MA0024.3	Highly_Enriched	Homeotherm	Felis_catus		74.0712
MA0024.3	Highly_Enriched	Homeotherm	Ficedula_albicollis		73.5685
MA0024.3	Highly_Enriched	Homeotherm	Gallus_gallus		69.7853
MA0024.3	Highly_Enriched	Homeotherm	Geospiza_fortis		73.1689
MA0024.3	Highly_Enriched	Homeotherm	Gorilla_gorilla		73.7233
MA0024.3	Highly_Enriched	Homeotherm	Homo_sapiens		74.2323
MA0024.3	Highly_Enriched	Homeotherm	Jaculus_jaculus		71.9624
MA0024.3	Highly_Enriched	Homeotherm	Loxodonta_africana		73.7637
MA0024.3	Highly_Enriched	Homeotherm	Lynx_canadensis		74.3919
MA0024.3	Highly_Enriched	Homeotherm	Macaca_mulatta		73.9821
MA0024.3	Highly_Enriched	Homeotherm	Manacus_vitellinus		70.4131
MA0024.3	Highly_Enriched	Homeotherm	Meleagris_gallopavo		73.2445
MA0024.3	Highly_Enriched	Homeotherm	Meriones_unguiculatus		72.7418
MA0024.3	Highly_Enriched	Homeotherm	Microcebus_murinus		74.8895
MA0024.3	Highly_Enriched	Homeotherm	Monodelphis_domestica		72.9074
MA0024.3	Highly_Enriched	Homeotherm	Mus_musculus		70.7841
MA0024.3	Highly_Enriched	Homeotherm	Mus_pahari		72.3447
MA0024.3	Highly_Enriched	Homeotherm	Nannospalax_galili		71.4659
MA0024.3	Highly_Enriched	Homeotherm	Neovison_vison		73.9763
MA0024.3	Highly_Enriched	Homeotherm	Notamacropus_eugenii		74.1656
MA0024.3	Highly_Enriched	Homeotherm	Nothoprocta_perdicaria		74.6066
MA0024.3	Highly_Enriched	Homeotherm	Numida_meleagris		73.4302
MA0024.3	Highly_Enriched	Homeotherm	Ornithorhynchus_anatinus		72.1351
MA0024.3	Highly_Enriched	Homeotherm	Oryctolagus_cuniculus		75.0717
MA0024.3	Highly_Enriched	Homeotherm	Otolemur_garnettii		72.8523
MA0024.3	Highly_Enriched	Homeotherm	Pan_troglodytes		73.8434
MA0024.3	Highly_Enriched	Homeotherm	Panthera_leo		74.4345
MA0024.3	Highly_Enriched	Homeotherm	Papio_anubis		73.6848
MA0024.3	Highly_Enriched	Homeotherm	Parus_major		72.5397
MA0024.3	Highly_Enriched	Homeotherm	Pavo_cristatus		72.619
MA0024.3	Highly_Enriched	Homeotherm	Phascolarctos_cinereus		72.542
MA0024.3	Highly_Enriched	Homeotherm	Phasianus_colchicus		70.8333
MA0024.3	Highly_Enriched	Homeotherm	Physeter_catodon		74.4858
MA0024.3	Highly_Enriched	Homeotherm	Piliocolobus_tephrosceles		74.0543
MA0024.3	Highly_Enriched	Homeotherm	Pongo_abelii		73.948
MA0024.3	Highly_Enriched	Homeotherm	Prolemur_simus		74.6354
MA0024.3	Highly_Enriched	Homeotherm	Pteropus_vampyrus		73.9222
MA0024.3	Highly_Enriched	Homeotherm	Rattus_norvegicus		69.0687
MA0024.3	Highly_Enriched	Homeotherm	Rhinolophus_ferrumequinum		73.5706
MA0024.3	Highly_Enriched	Homeotherm	Rhinopithecus_roxellana		73.9059
MA0024.3	Highly_Enriched	Homeotherm	Sarcophilus_harrisii		73.3492
MA0024.3	Highly_Enriched	Homeotherm	Sciurus_vulgaris		73.8561
MA0024.3	Highly_Enriched	Homeotherm	Serinus_canaria		69.8218
MA0024.3	Highly_Enriched	Homeotherm	Sorex_araneus		74.0888
MA0024.3	Highly_Enriched	Homeotherm	Stachyris_ruficeps		72.3394
MA0024.3	Highly_Enriched	Homeotherm	Strigops_habroptila		72.5895
MA0024.3	Highly_Enriched	Homeotherm	Strix_occidentalis		73.7234
MA0024.3	Highly_Enriched	Homeotherm	Struthio_camelus		74.0602
MA0024.3	Highly_Enriched	Homeotherm	Sus_scrofa		74.164
MA0024.3	Highly_Enriched	Homeotherm	Taeniopygia_guttata		70.8333
MA0024.3	Highly_Enriched	Homeotherm	Tupaia_belangeri		73.8687
MA0024.3	Highly_Enriched	Homeotherm	Urocitellus_parryii		74.0855
MA0024.3	Highly_Enriched	Homeotherm	Ursus_maritimus		73.544
MA0024.3	Highly_Enriched	Homeotherm	Vulpes_vulpes		74.5049
MA0024.3	Highly_Enriched	Homeotherm	Zalophus_californianus		74.1776
MA0024.3	Highly_Enriched	Homeotherm	Zonotrichia_albicollis		72.4474
MA0024.3	Highly_Enriched	Poikilotherm	Anolis_carolinensis		67.9251
MA0024.3	Highly_Enriched	Poikilotherm	Chelonoidis_abingdonii		68.5966
MA0024.3	Highly_Enriched	Poikilotherm	Chelydra_serpentina		71.966
MA0024.3	Highly_Enriched	Poikilotherm	Chrysemys_picta		68.8413
MA0024.3	Highly_Enriched	Poikilotherm	Crocodylus_porosus		70.6698
MA0024.3	Highly_Enriched	Poikilotherm	Erpetoichthys_calabaricus		67.192
MA0024.3	Highly_Enriched	Poikilotherm	Gopherus_evgoodei		69.5841
MA0024.3	Highly_Enriched	Poikilotherm	Laticauda_laticaudata		68.7681
MA0024.3	Highly_Enriched	Poikilotherm	Latimeria_chalumnae		71.5515
MA0024.3	Highly_Enriched	Poikilotherm	Leptobrachium_leishanense		69.1366
MA0024.3	Highly_Enriched	Poikilotherm	Naja_naja		69.8143
MA0024.3	Highly_Enriched	Poikilotherm	Notechis_scutatus		70.9901
MA0024.3	Highly_Enriched	Poikilotherm	Pelodiscus_sinensis		73.4293
MA0024.3	Highly_Enriched	Poikilotherm	Pelusios_castaneus		73.2365
MA0024.3	Highly_Enriched	Poikilotherm	Podarcis_muralis		73.0651
MA0024.3	Highly_Enriched	Poikilotherm	Pseudonaja_textilis		72.2693
MA0024.3	Highly_Enriched	Poikilotherm	Salvator_merianae		71.4443
MA0024.3	Highly_Enriched	Poikilotherm	Sphenodon_punctatus		71.6405
MA0024.3	Highly_Enriched	Poikilotherm	Terrapene_carolina		68.4852
MA0024.3	Highly_Enriched	Poikilotherm	Varanus_komodoensis		72.7171
MA0024.3	Highly_Enriched	Poikilotherm	Xenopus_tropicalis		66.0355
MA0028.3	Highly_Reduced	Homeotherm	Amazona_collaria	69.224
MA0028.3	Highly_Reduced	Homeotherm	Anas_platyrhynchos	71.7718
MA0028.3	Highly_Reduced	Homeotherm	Anas_platyrhynchos_platyrhynchos
MA0028.3	Highly_Reduced	Homeotherm	Aotus_nancymaae	68.7339
MA0028.3	Highly_Reduced	Homeotherm	Apteryx_haastii	70.493
MA0028.3	Highly_Reduced	Homeotherm	Aquila_chrysaetos	70.8617
MA0028.3	Highly_Reduced	Homeotherm	Aquila_chrysaetos_chrysaetos
MA0028.3	Highly_Reduced	Homeotherm	Athene_cunicularia	72.3404
MA0028.3	Highly_Reduced	Homeotherm	Balaenoptera_musculus	69.2371
MA0028.3	Highly_Reduced	Homeotherm	Bison_bison_bison	68.7085
MA0028.3	Highly_Reduced	Homeotherm	Bos_taurus	68.7013
MA0028.3	Highly_Reduced	Homeotherm	Cairina_moschata_domestica	71.0351
MA0028.3	Highly_Reduced	Homeotherm	Calidris_pugnax	69.3631
MA0028.3	Highly_Reduced	Homeotherm	Callithrix_jacchus	68.6556
MA0028.3	Highly_Reduced	Homeotherm	Camelus_dromedarius	68.1922
MA0028.3	Highly_Reduced	Homeotherm	Canis_lupus_familiaris	69.4869
MA0028.3	Highly_Reduced	Homeotherm	Carlito_syrichta	68.9336
MA0028.3	Highly_Reduced	Homeotherm	Castor_canadensis	67.6486
MA0028.3	Highly_Reduced	Homeotherm	Catharus_ustulatus	69.6189
MA0028.3	Highly_Reduced	Homeotherm	Cebus_imitator	68.8172
MA0028.3	Highly_Reduced	Homeotherm	Cercocebus_atys	68.2118
MA0028.3	Highly_Reduced	Homeotherm	Cervus_hanglu_yarkandensis	69.8232
MA0028.3	Highly_Reduced	Homeotherm	Choloepus_hoffmanni	68.1159
MA0028.3	Highly_Reduced	Homeotherm	Corvus_moneduloides	71.1508
MA0028.3	Highly_Reduced	Homeotherm	Coturnix_japonica	68.9936
MA0028.3	Highly_Reduced	Homeotherm	Delphinapterus_leucas	68.5005
MA0028.3	Highly_Reduced	Homeotherm	Echinops_telfairi	68.107
MA0028.3	Highly_Reduced	Homeotherm	Equus_asinus	69.9169
MA0028.3	Highly_Reduced	Homeotherm	Equus_caballus	63.1027
MA0028.3	Highly_Reduced	Homeotherm	Erinaceus_europaeus	64.6784
MA0028.3	Highly_Reduced	Homeotherm	Felis_catus	68.33
MA0028.3	Highly_Reduced	Homeotherm	Ficedula_albicollis	69.0196
MA0028.3	Highly_Reduced	Homeotherm	Gallus_gallus	69.2047
MA0028.3	Highly_Reduced	Homeotherm	Geospiza_fortis	69.1919
MA0028.3	Highly_Reduced	Homeotherm	Gorilla_gorilla	68.8889
MA0028.3	Highly_Reduced	Homeotherm	Homo_sapiens	67.8025
MA0028.3	Highly_Reduced	Homeotherm	Jaculus_jaculus	67.4117
MA0028.3	Highly_Reduced	Homeotherm	Loxodonta_africana	67.3525
MA0028.3	Highly_Reduced	Homeotherm	Lynx_canadensis	69.2279
MA0028.3	Highly_Reduced	Homeotherm	Macaca_mulatta	68.2796
MA0028.3	Highly_Reduced	Homeotherm	Manacus_vitellinus	70.8955
MA0028.3	Highly_Reduced	Homeotherm	Meleagris_gallopavo	68.3673
MA0028.3	Highly_Reduced	Homeotherm	Meriones_unguiculatus	68.2582
MA0028.3	Highly_Reduced	Homeotherm	Microcebus_murinus	69.1193
MA0028.3	Highly_Reduced	Homeotherm	Monodelphis_domestica	67.097
MA0028.3	Highly_Reduced	Homeotherm	Mus_musculus	67.9556
MA0028.3	Highly_Reduced	Homeotherm	Mus_pahari	62.2222
MA0028.3	Highly_Reduced	Homeotherm	Nannospalax_galili	68.4323
MA0028.3	Highly_Reduced	Homeotherm	Neovison_vison	67.9516
MA0028.3	Highly_Reduced	Homeotherm	Notamacropus_eugenii	67.2673
MA0028.3	Highly_Reduced	Homeotherm	Nothoprocta_perdicaria	70.3704
MA0028.3	Highly_Reduced	Homeotherm	Numida_meleagris	69.188
MA0028.3	Highly_Reduced	Homeotherm	Ornithorhynchus_anatinus	66.8755
MA0028.3	Highly_Reduced	Homeotherm	Oryctolagus_cuniculus	68.3312
MA0028.3	Highly_Reduced	Homeotherm	Otolemur_garnettii	68.0556
MA0028.3	Highly_Reduced	Homeotherm	Pan_troglodytes	69.322
MA0028.3	Highly_Reduced	Homeotherm	Panthera_leo	69.3166
MA0028.3	Highly_Reduced	Homeotherm	Papio_anubis	67.8611
MA0028.3	Highly_Reduced	Homeotherm	Parus_major	71.1855
MA0028.3	Highly_Reduced	Homeotherm	Pavo_cristatus	68.3838
MA0028.3	Highly_Reduced	Homeotherm	Phascolarctos_cinereus	68.6803
MA0028.3	Highly_Reduced	Homeotherm	Phasianus_colchicus	68.2143
MA0028.3	Highly_Reduced	Homeotherm	Physeter_catodon	69.5857
MA0028.3	Highly_Reduced	Homeotherm	Piliocolobus_tephrosceles	67.8699
MA0028.3	Highly_Reduced	Homeotherm	Pongo_abelii	68.9982
MA0028.3	Highly_Reduced	Homeotherm	Prolemur_simus	69.6296
MA0028.3	Highly_Reduced	Homeotherm	Pteropus_vampyrus	68.7339
MA0028.3	Highly_Reduced	Homeotherm	Rattus_norvegicus	67.6214
MA0028.3	Highly_Reduced	Homeotherm	Rhinolophus_ferrumequinum	67.5343
MA0028.3	Highly_Reduced	Homeotherm	Rhinopithecus_roxellana	67.6633
MA0028.3	Highly_Reduced	Homeotherm	Sarcophilus_harrisii	69.2715
MA0028.3	Highly_Reduced	Homeotherm	Sciurus_vulgaris	69.418
MA0028.3	Highly_Reduced	Homeotherm	Serinus_canaria	70.3704
MA0028.3	Highly_Reduced	Homeotherm	Sorex_araneus	68.2222
MA0028.3	Highly_Reduced	Homeotherm	Stachyris_ruficeps	70.8098
MA0028.3	Highly_Reduced	Homeotherm	Strigops_habroptila	70.7407
MA0028.3	Highly_Reduced	Homeotherm	Strix_occidentalis_caurina	70.9784
MA0028.3	Highly_Reduced	Homeotherm	Struthio_camelus_australis	68.3502
MA0028.3	Highly_Reduced	Homeotherm	Sus_scrofa	69.2927
MA0028.3	Highly_Reduced	Homeotherm	Taeniopygia_guttata	70.1299
MA0028.3	Highly_Reduced	Homeotherm	Tupaia_belangeri	68.0556
MA0028.3	Highly_Reduced	Homeotherm	Urocitellus_parryii	69.1024
MA0028.3	Highly_Reduced	Homeotherm	Ursus_maritimus	67.4724
MA0028.3	Highly_Reduced	Homeotherm	Vulpes_vulpes	69.26
MA0028.3	Highly_Reduced	Homeotherm	Zalophus_californianus	68.7462
MA0028.3	Highly_Reduced	Homeotherm	Zonotrichia_albicollis	71.021
MA0028.3	Highly_Reduced	Poikilotherm	Anolis_carolinensis	67.6587
MA0028.3	Highly_Reduced	Poikilotherm	Chelonoidis_abingdonii	65.8593
MA0028.3	Highly_Reduced	Poikilotherm	Chelydra_serpentina	67.6943
MA0028.3	Highly_Reduced	Poikilotherm	Chrysemys_picta_bellii	69.6697
MA0028.3	Highly_Reduced	Poikilotherm	Crocodylus_porosus	67.8735
MA0028.3	Highly_Reduced	Poikilotherm	Erpetoichthys_calabaricus	59.2593
MA0028.3	Highly_Reduced	Poikilotherm	Gopherus_evgoodei	67.3953
MA0028.3	Highly_Reduced	Poikilotherm	Laticauda_laticaudata	69.296
MA0028.3	Highly_Reduced	Poikilotherm	Latimeria_chalumnae	64.4444
MA0028.3	Highly_Reduced	Poikilotherm	Leptobrachium_leishanense	61.9342
MA0028.3	Highly_Reduced	Poikilotherm	Naja_naja	69.9387
MA0028.3	Highly_Reduced	Poikilotherm	Notechis_scutatus	68.2887
MA0028.3	Highly_Reduced	Poikilotherm	Pelodiscus_sinensis	66.6667
MA0028.3	Highly_Reduced	Poikilotherm	Pelusios_castaneus	67.3555
MA0028.3	Highly_Reduced	Poikilotherm	Podarcis_muralis	66.2551
MA0028.3	Highly_Reduced	Poikilotherm	Pseudonaja_textilis
MA0028.3	Highly_Reduced	Poikilotherm	Pseudonaja_textlis	70.7447
MA0028.3	Highly_Reduced	Poikilotherm	Salvator_merianae	67.8704
MA0028.3	Highly_Reduced	Poikilotherm	Sphenodon_punctatus	64.8258
MA0028.3	Highly_Reduced	Poikilotherm	Terrapene_carolina_triunguis	66.7553
MA0028.3	Highly_Reduced	Poikilotherm	Varanus_komodoensis	68.7037
MA0028.3	Highly_Reduced	Poikilotherm	Xenopus_tropicalis	64.4592
MA0028.3	Moderately_Enriched	Homeotherm	Amazona_collaria		68.8051
MA0028.3	Moderately_Enriched	Homeotherm	Anas_platyrhynchos		71.1652
MA0028.3	Moderately_Enriched	Homeotherm	Aotus_nancymaae		66.3442
MA0028.3	Moderately_Enriched	Homeotherm	Apteryx_haastii		69.8276
MA0028.3	Moderately_Enriched	Homeotherm	Aquila_chrysaetos		68.1321
MA0028.3	Moderately_Enriched	Homeotherm	Athene_cunicularia		67.8708
MA0028.3	Moderately_Enriched	Homeotherm	Balaenoptera_musculus		67.9861
MA0028.3	Moderately_Enriched	Homeotherm	Bison_bison		66.7966
MA0028.3	Moderately_Enriched	Homeotherm	Bos_taurus		67.7901
MA0028.3	Moderately_Enriched	Homeotherm	Cairina_moschata		70.2867
MA0028.3	Moderately_Enriched	Homeotherm	Calidris_pugnax		66.5189
MA0028.3	Moderately_Enriched	Homeotherm	Callithrix_jacchus		66.3265
MA0028.3	Moderately_Enriched	Homeotherm	Camelus_dromedarius		67.3387
MA0028.3	Moderately_Enriched	Homeotherm	Canis_lupus		68.2791
MA0028.3	Moderately_Enriched	Homeotherm	Carlito_syrichta		67.5856
MA0028.3	Moderately_Enriched	Homeotherm	Castor_canadensis		65.4701
MA0028.3	Moderately_Enriched	Homeotherm	Catharus_ustulatus		67.6217
MA0028.3	Moderately_Enriched	Homeotherm	Cebus_imitator		66.9847
MA0028.3	Moderately_Enriched	Homeotherm	Cercocebus_atys		66.9485
MA0028.3	Moderately_Enriched	Homeotherm	Cervus_hanglu		67.7083
MA0028.3	Moderately_Enriched	Homeotherm	Choloepus_hoffmanni		66.4299
MA0028.3	Moderately_Enriched	Homeotherm	Corvus_moneduloides		70.2314
MA0028.3	Moderately_Enriched	Homeotherm	Coturnix_japonica		60.7009
MA0028.3	Moderately_Enriched	Homeotherm	Delphinapterus_leucas		67.8965
MA0028.3	Moderately_Enriched	Homeotherm	Echinops_telfairi		65.8568
MA0028.3	Moderately_Enriched	Homeotherm	Equus_asinus		67.5486
MA0028.3	Moderately_Enriched	Homeotherm	Equus_caballus		67.6856
MA0028.3	Moderately_Enriched	Homeotherm	Erinaceus_europaeus		62.8299
MA0028.3	Moderately_Enriched	Homeotherm	Felis_catus		66.5867
MA0028.3	Moderately_Enriched	Homeotherm	Ficedula_albicollis		66.4167
MA0028.3	Moderately_Enriched	Homeotherm	Gallus_gallus		67.239
MA0028.3	Moderately_Enriched	Homeotherm	Geospiza_fortis		66.4882
MA0028.3	Moderately_Enriched	Homeotherm	Gorilla_gorilla		67.0019
MA0028.3	Moderately_Enriched	Homeotherm	Homo_sapiens		67.6924
MA0028.3	Moderately_Enriched	Homeotherm	Jaculus_jaculus		64.9027
MA0028.3	Moderately_Enriched	Homeotherm	Loxodonta_africana		66.0591
MA0028.3	Moderately_Enriched	Homeotherm	Lynx_canadensis		64.5556
MA0028.3	Moderately_Enriched	Homeotherm	Macaca_mulatta		67.6147
MA0028.3	Moderately_Enriched	Homeotherm	Manacus_vitellinus		71.4988
MA0028.3	Moderately_Enriched	Homeotherm	Meleagris_gallopavo		65.8652
MA0028.3	Moderately_Enriched	Homeotherm	Meriones_unguiculatus		65.7908
MA0028.3	Moderately_Enriched	Homeotherm	Microcebus_murinus		68.0556
MA0028.3	Moderately_Enriched	Homeotherm	Monodelphis_domestica		64.6398
MA0028.3	Moderately_Enriched	Homeotherm	Mus_musculus		63.5641
MA0028.3	Moderately_Enriched	Homeotherm	Mus_pahari		63.6364
MA0028.3	Moderately_Enriched	Homeotherm	Nannospalax_galili		64.3311
MA0028.3	Moderately_Enriched	Homeotherm	Neovison_vison		67.0968
MA0028.3	Moderately_Enriched	Homeotherm	Notamacropus_eugenii		64.3481
MA0028.3	Moderately_Enriched	Homeotherm	Nothoprocta_perdicaria		69.2032
MA0028.3	Moderately_Enriched	Homeotherm	Numida_meleagris		67.6853
MA0028.3	Moderately_Enriched	Homeotherm	Ornithorhynchus_anatinus		68.4004
MA0028.3	Moderately_Enriched	Homeotherm	Oryctolagus_cuniculus		67.3182
MA0028.3	Moderately_Enriched	Homeotherm	Otolemur_garnettii		66.1315
MA0028.3	Moderately_Enriched	Homeotherm	Pan_troglodytes		67.092
MA0028.3	Moderately_Enriched	Homeotherm	Panthera_leo		67.5221
MA0028.3	Moderately_Enriched	Homeotherm	Papio_anubis		66.8998
MA0028.3	Moderately_Enriched	Homeotherm	Parus_major		68.3962
MA0028.3	Moderately_Enriched	Homeotherm	Pavo_cristatus		67.2718
MA0028.3	Moderately_Enriched	Homeotherm	Phascolarctos_cinereus		66.0502
MA0028.3	Moderately_Enriched	Homeotherm	Phasianus_colchicus		65.8232
MA0028.3	Moderately_Enriched	Homeotherm	Physeter_catodon		68.287
MA0028.3	Moderately_Enriched	Homeotherm	Piliocolobus_tephrosceles		67.2016
MA0028.3	Moderately_Enriched	Homeotherm	Pongo_abelii		67.0801
MA0028.3	Moderately_Enriched	Homeotherm	Prolemur_simus		67.4419
MA0028.3	Moderately_Enriched	Homeotherm	Pteropus_vampyrus		67.4142
MA0028.3	Moderately_Enriched	Homeotherm	Rattus_norvegicus		64.163
MA0028.3	Moderately_Enriched	Homeotherm	Rhinolophus_ferrumequinum		65.9228
MA0028.3	Moderately_Enriched	Homeotherm	Rhinopithecus_roxellana		66.6879
MA0028.3	Moderately_Enriched	Homeotherm	Sarcophilus_harrisii		67.6993
MA0028.3	Moderately_Enriched	Homeotherm	Sciurus_vulgaris		66.5578
MA0028.3	Moderately_Enriched	Homeotherm	Serinus_canaria		67.0462
MA0028.3	Moderately_Enriched	Homeotherm	Sorex_araneus		67.7425
MA0028.3	Moderately_Enriched	Homeotherm	Stachyris_ruficeps		68.0761
MA0028.3	Moderately_Enriched	Homeotherm	Strigops_habroptila		69.6296
MA0028.3	Moderately_Enriched	Homeotherm	Strix_occidentalis		69.1911
MA0028.3	Moderately_Enriched	Homeotherm	Struthio_camelus		67.5813
MA0028.3	Moderately_Enriched	Homeotherm	Sus_scrofa		67.4023
MA0028.3	Moderately_Enriched	Homeotherm	Taeniopygia_guttata		67.3645
MA0028.3	Moderately_Enriched	Homeotherm	Tupaia_belangeri		66.1299
MA0028.3	Moderately_Enriched	Homeotherm	Urocitellus_parryii		64.8729
MA0028.3	Moderately_Enriched	Homeotherm	Ursus_maritimus		66.9203
MA0028.3	Moderately_Enriched	Homeotherm	Vulpes_vulpes		68.0171
MA0028.3	Moderately_Enriched	Homeotherm	Zalophus_californianus		67.696
MA0028.3	Moderately_Enriched	Homeotherm	Zonotrichia_albicollis		66.3024
MA0028.3	Moderately_Enriched	Poikilotherm	Anolis_carolinensis		64.4295
MA0028.3	Moderately_Enriched	Poikilotherm	Chelonoidis_abingdonii		64.233
MA0028.3	Moderately_Enriched	Poikilotherm	Chelydra_serpentina		63.6748
MA0028.3	Moderately_Enriched	Poikilotherm	Chrysemys_picta		63.6557
MA0028.3	Moderately_Enriched	Poikilotherm	Crocodylus_porosus		65.1155
MA0028.3	Moderately_Enriched	Poikilotherm	Erpetoichthys_calabaricus		60.041
MA0028.3	Moderately_Enriched	Poikilotherm	Gopherus_evgoodei		63.76
MA0028.3	Moderately_Enriched	Poikilotherm	Laticauda_laticaudata		70.416
MA0028.3	Moderately_Enriched	Poikilotherm	Latimeria_chalumnae		64.1168
MA0028.3	Moderately_Enriched	Poikilotherm	Leptobrachium_leishanense		55.1933
MA0028.3	Moderately_Enriched	Poikilotherm	Naja_naja		65.7751
MA0028.3	Moderately_Enriched	Poikilotherm	Notechis_scutatus		63.8646
MA0028.3	Moderately_Enriched	Poikilotherm	Pelodiscus_sinensis		68.1193
MA0028.3	Moderately_Enriched	Poikilotherm	Pelusios_castaneus		64.3379
MA0028.3	Moderately_Enriched	Poikilotherm	Podarcis_muralis		68.7026
MA0028.3	Moderately_Enriched	Poikilotherm	Pseudonaja_textilis		65.9004
MA0028.3	Moderately_Enriched	Poikilotherm	Salvator_merianae		66.7838
MA0028.3	Moderately_Enriched	Poikilotherm	Sphenodon_punctatus		66.3504
MA0028.3	Moderately_Enriched	Poikilotherm	Terrapene_carolina		63.9304
MA0028.3	Moderately_Enriched	Poikilotherm	Varanus_komodoensis		70.1679
MA0028.3	Moderately_Enriched	Poikilotherm	Xenopus_tropicalis		59.7624
MA0067.3	Highly_Enriched	Homeotherm	Amazona_collaria		76.7259
MA0067.3	Highly_Enriched	Homeotherm	Anas_platyrhynchos		71.6545
MA0067.3	Highly_Enriched	Homeotherm	Aotus_nancymaae		73.2029
MA0067.3	Highly_Enriched	Homeotherm	Apteryx_haastii		78.6324
MA0067.3	Highly_Enriched	Homeotherm	Aquila_chrysaetos		80.0131
MA0067.3	Highly_Enriched	Homeotherm	Athene_cunicularia		75.1112
MA0067.3	Highly_Enriched	Homeotherm	Balaenoptera_musculus		71.6377
MA0067.3	Highly_Enriched	Homeotherm	Bison_bison		74.0064
MA0067.3	Highly_Enriched	Homeotherm	Bos_taurus		75.0729
MA0067.3	Highly_Enriched	Homeotherm	Cairina_moschata		73.1725
MA0067.3	Highly_Enriched	Homeotherm	Calidris_pugnax		76.1848
MA0067.3	Highly_Enriched	Homeotherm	Callithrix_jacchus		73.3553
MA0067.3	Highly_Enriched	Homeotherm	Camelus_dromedarius		74.3705
MA0067.3	Highly_Enriched	Homeotherm	Canis_lupus		75.7726
MA0067.3	Highly_Enriched	Homeotherm	Carlito_syrichta		72.2876
MA0067.3	Highly_Enriched	Homeotherm	Castor_canadensis		74.0188
MA0067.3	Highly_Enriched	Homeotherm	Catharus_ustulatus		83.0929
MA0067.3	Highly_Enriched	Homeotherm	Cebus_imitator		73.2641
MA0067.3	Highly_Enriched	Homeotherm	Cercocebus_atys		73.3825
MA0067.3	Highly_Enriched	Homeotherm	Cervus_hanglu		73.8962
MA0067.3	Highly_Enriched	Homeotherm	Choloepus_hoffmanni		73.4448
MA0067.3	Highly_Enriched	Homeotherm	Corvus_moneduloides		78.3048
MA0067.3	Highly_Enriched	Homeotherm	Coturnix_japonica		77.3317
MA0067.3	Highly_Enriched	Homeotherm	Delphinapterus_leucas		71.3337
MA0067.3	Highly_Enriched	Homeotherm	Echinops_telfairi		71.5417
MA0067.3	Highly_Enriched	Homeotherm	Equus_asinus		73.905
MA0067.3	Highly_Enriched	Homeotherm	Equus_caballus		74.3642
MA0067.3	Highly_Enriched	Homeotherm	Erinaceus_europaeus		67.8374
MA0067.3	Highly_Enriched	Homeotherm	Felis_catus		74.4151
MA0067.3	Highly_Enriched	Homeotherm	Ficedula_albicollis		76.1442
MA0067.3	Highly_Enriched	Homeotherm	Gallus_gallus		79.5547
MA0067.3	Highly_Enriched	Homeotherm	Geospiza_fortis		72.1344
MA0067.3	Highly_Enriched	Homeotherm	Gorilla_gorilla		72.5312
MA0067.3	Highly_Enriched	Homeotherm	Homo_sapiens		73.6311
MA0067.3	Highly_Enriched	Homeotherm	Jaculus_jaculus		69.9263
MA0067.3	Highly_Enriched	Homeotherm	Loxodonta_africana		72.1395
MA0067.3	Highly_Enriched	Homeotherm	Lynx_canadensis		74.463
MA0067.3	Highly_Enriched	Homeotherm	Macaca_mulatta		73.4909
MA0067.3	Highly_Enriched	Homeotherm	Manacus_vitellinus		75.401
MA0067.3	Highly_Enriched	Homeotherm	Meleagris_gallopavo		73.118
MA0067.3	Highly_Enriched	Homeotherm	Meriones_unguiculatus		74.2006
MA0067.3	Highly_Enriched	Homeotherm	Microcebus_murinus		75.933
MA0067.3	Highly_Enriched	Homeotherm	Monodelphis_domestica		71.1911
MA0067.3	Highly_Enriched	Homeotherm	Mus_musculus		69.9183
MA0067.3	Highly_Enriched	Homeotherm	Mus_pahari		71.1163
MA0067.3	Highly_Enriched	Homeotherm	Nannospalax_galili		70.6072
MA0067.3	Highly_Enriched	Homeotherm	Neovison_vison		73.367
MA0067.3	Highly_Enriched	Homeotherm	Notamacropus_eugenii		71.7091
MA0067.3	Highly_Enriched	Homeotherm	Nothoprocta_perdicaria		80.0436
MA0067.3	Highly_Enriched	Homeotherm	Numida_meleagris		77.4433
MA0067.3	Highly_Enriched	Homeotherm	Ornithorhynchus_anatinus		76.5229
MA0067.3	Highly_Enriched	Homeotherm	Oryctolagus_cuniculus		75.0163
MA0067.3	Highly_Enriched	Homeotherm	Otolemur_garnettii		72.2279
MA0067.3	Highly_Enriched	Homeotherm	Pan_troglodytes		74.0004
MA0067.3	Highly_Enriched	Homeotherm	Panthera_leo		74.5697
MA0067.3	Highly_Enriched	Homeotherm	Papio_anubis		73.6271
MA0067.3	Highly_Enriched	Homeotherm	Parus_major		78.2118
MA0067.3	Highly_Enriched	Homeotherm	Pavo_cristatus		79.1886
MA0067.3	Highly_Enriched	Homeotherm	Phascolarctos_cinereus		70.6263
MA0067.3	Highly_Enriched	Homeotherm	Phasianus_colchicus		79.377
MA0067.3	Highly_Enriched	Homeotherm	Physeter_catodon		71.8277
MA0067.3	Highly_Enriched	Homeotherm	Piliocolobus_tephrosceles		73.3361
MA0067.3	Highly_Enriched	Homeotherm	Pongo_abelii		73.2372
MA0067.3	Highly_Enriched	Homeotherm	Prolemur_simus		74.3965
MA0067.3	Highly_Enriched	Homeotherm	Pteropus_vampyrus		74.7845
MA0067.3	Highly_Enriched	Homeotherm	Rattus_norvegicus		70.2951
MA0067.3	Highly_Enriched	Homeotherm	Rhinolophus_ferrumequinum		72.7974
MA0067.3	Highly_Enriched	Homeotherm	Rhinopithecus_roxellana		72.1204
MA0067.3	Highly_Enriched	Homeotherm	Sarcophilus_harrisii		75.2468
MA0067.3	Highly_Enriched	Homeotherm	Sciurus_vulgaris		71.5956
MA0067.3	Highly_Enriched	Homeotherm	Serinus_canaria		74.8549
MA0067.3	Highly_Enriched	Homeotherm	Sorex_araneus		72.9833
MA0067.3	Highly_Enriched	Homeotherm	Stachyris_ruficeps		78.7388
MA0067.3	Highly_Enriched	Homeotherm	Strigops_habroptila		79.4179
MA0067.3	Highly_Enriched	Homeotherm	Strix_occidentalis		78.9943
MA0067.3	Highly_Enriched	Homeotherm	Struthio_camelus		74.1538
MA0067.3	Highly_Enriched	Homeotherm	Sus_scrofa		73.8749
MA0067.3	Highly_Enriched	Homeotherm	Taeniopygia_guttata		79.0028
MA0067.3	Highly_Enriched	Homeotherm	Tupaia_belangeri		71.5387
MA0067.3	Highly_Enriched	Homeotherm	Urocitellus_parryii		70.5197
MA0067.3	Highly_Enriched	Homeotherm	Ursus_maritimus		71.2537
MA0067.3	Highly_Enriched	Homeotherm	Vulpes_vulpes		74.1047
MA0067.3	Highly_Enriched	Homeotherm	Zalophus_californianus		74.2185
MA0067.3	Highly_Enriched	Homeotherm	Zonotrichia_albicollis		75.2227
MA0067.3	Highly_Enriched	Poikilotherm	Anolis_carolinensis		84.4172
MA0067.3	Highly_Enriched	Poikilotherm	Chelonoidis_abingdonii		71.6997
MA0067.3	Highly_Enriched	Poikilotherm	Chelydra_serpentina		74.215
MA0067.3	Highly_Enriched	Poikilotherm	Chrysemys_picta		72.1098
MA0067.3	Highly_Enriched	Poikilotherm	Crocodylus_porosus		71.1512
MA0067.3	Highly_Enriched	Poikilotherm	Erpetoichthys_calabaricus		69.1941
MA0067.3	Highly_Enriched	Poikilotherm	Gopherus_evgoodei		71.9729
MA0067.3	Highly_Enriched	Poikilotherm	Laticauda_laticaudata		71.9019
MA0067.3	Highly_Enriched	Poikilotherm	Latimeria_chalumnae		66.2832
MA0067.3	Highly_Enriched	Poikilotherm	Leptobrachium_leishanense		69.777
MA0067.3	Highly_Enriched	Poikilotherm	Naja_naja		69.704
MA0067.3	Highly_Enriched	Poikilotherm	Notechis_scutatus		74.6709
MA0067.3	Highly_Enriched	Poikilotherm	Pelodiscus_sinensis		72.3836
MA0067.3	Highly_Enriched	Poikilotherm	Pelusios_castaneus		73.329
MA0067.3	Highly_Enriched	Poikilotherm	Podarcis_muralis		73.9334
MA0067.3	Highly_Enriched	Poikilotherm	Pseudonaja_textilis		72.5144
MA0067.3	Highly_Enriched	Poikilotherm	Salvator_merianae		75.7996
MA0067.3	Highly_Enriched	Poikilotherm	Sphenodon_punctatus		69.0465
MA0067.3	Highly_Enriched	Poikilotherm	Terrapene_carolina		74.5157
MA0067.3	Highly_Enriched	Poikilotherm	Varanus_komodoensis		75
MA0067.3	Highly_Enriched	Poikilotherm	Xenopus_tropicalis		67.2606
MA0073.2	Highly_Reduced	Homeotherm	Amazona_collaria	81.5827
MA0073.2	Highly_Reduced	Homeotherm	Anas_platyrhynchos	82.6854
MA0073.2	Highly_Reduced	Homeotherm	Anas_platyrhynchos_platyrhynchos
MA0073.2	Highly_Reduced	Homeotherm	Aotus_nancymaae	75.6448
MA0073.2	Highly_Reduced	Homeotherm	Apteryx_haastii	76.0973
MA0073.2	Highly_Reduced	Homeotherm	Aquila_chrysaetos	84.2581
MA0073.2	Highly_Reduced	Homeotherm	Aquila_chrysaetos_chrysaetos
MA0073.2	Highly_Reduced	Homeotherm	Athene_cunicularia	73.5369
MA0073.2	Highly_Reduced	Homeotherm	Balaenoptera_musculus	79.8997
MA0073.2	Highly_Reduced	Homeotherm	Bison_bison_bison	76.1204
MA0073.2	Highly_Reduced	Homeotherm	Bos_taurus	79.48
MA0073.2	Highly_Reduced	Homeotherm	Cairina_moschata_domestica	81.1078
MA0073.2	Highly_Reduced	Homeotherm	Calidris_pugnax	76.1811
MA0073.2	Highly_Reduced	Homeotherm	Callithrix_jacchus	77.503
MA0073.2	Highly_Reduced	Homeotherm	Camelus_dromedarius	78.7291
MA0073.2	Highly_Reduced	Homeotherm	Canis_lupus_familiaris	86.9639
MA0073.2	Highly_Reduced	Homeotherm	Carlito_syrichta	76.7496
MA0073.2	Highly_Reduced	Homeotherm	Castor_canadensis	79.5679
MA0073.2	Highly_Reduced	Homeotherm	Catharus_ustulatus	69.8708
MA0073.2	Highly_Reduced	Homeotherm	Cebus_imitator	78.2257
MA0073.2	Highly_Reduced	Homeotherm	Cercocebus_atys	76.6904
MA0073.2	Highly_Reduced	Homeotherm	Cervus_hanglu_yarkandensis	80.8195
MA0073.2	Highly_Reduced	Homeotherm	Choloepus_hoffmanni	73.9673
MA0073.2	Highly_Reduced	Homeotherm	Corvus_moneduloides	76.4523
MA0073.2	Highly_Reduced	Homeotherm	Coturnix_japonica	77.2757
MA0073.2	Highly_Reduced	Homeotherm	Delphinapterus_leucas	80.7762
MA0073.2	Highly_Reduced	Homeotherm	Echinops_telfairi	77.2465
MA0073.2	Highly_Reduced	Homeotherm	Equus_asinus	82.7411
MA0073.2	Highly_Reduced	Homeotherm	Equus_caballus	79.1063
MA0073.2	Highly_Reduced	Homeotherm	Erinaceus_europaeus	75.7404
MA0073.2	Highly_Reduced	Homeotherm	Felis_catus	90.7157
MA0073.2	Highly_Reduced	Homeotherm	Ficedula_albicollis	76.0467
MA0073.2	Highly_Reduced	Homeotherm	Gallus_gallus	80.715
MA0073.2	Highly_Reduced	Homeotherm	Geospiza_fortis	67.987
MA0073.2	Highly_Reduced	Homeotherm	Gorilla_gorilla	76.2726
MA0073.2	Highly_Reduced	Homeotherm	Homo_sapiens	77.8358
MA0073.2	Highly_Reduced	Homeotherm	Jaculus_jaculus	76.8243
MA0073.2	Highly_Reduced	Homeotherm	Loxodonta_africana	75.2698
MA0073.2	Highly_Reduced	Homeotherm	Lynx_canadensis	83.3179
MA0073.2	Highly_Reduced	Homeotherm	Macaca_mulatta	77.14
MA0073.2	Highly_Reduced	Homeotherm	Manacus_vitellinus	70.8261
MA0073.2	Highly_Reduced	Homeotherm	Meleagris_gallopavo	71.9345
MA0073.2	Highly_Reduced	Homeotherm	Meriones_unguiculatus	80.0252
MA0073.2	Highly_Reduced	Homeotherm	Microcebus_murinus	76.9205
MA0073.2	Highly_Reduced	Homeotherm	Monodelphis_domestica	77.2087
MA0073.2	Highly_Reduced	Homeotherm	Mus_musculus	78.5919
MA0073.2	Highly_Reduced	Homeotherm	Mus_pahari	74.04
MA0073.2	Highly_Reduced	Homeotherm	Nannospalax_galili	78.6899
MA0073.2	Highly_Reduced	Homeotherm	Neovison_vison	76.1844
MA0073.2	Highly_Reduced	Homeotherm	Notamacropus_eugenii	77.3256
MA0073.2	Highly_Reduced	Homeotherm	Nothoprocta_perdicaria	76.7838
MA0073.2	Highly_Reduced	Homeotherm	Numida_meleagris	77.0173
MA0073.2	Highly_Reduced	Homeotherm	Ornithorhynchus_anatinus	82.0435
MA0073.2	Highly_Reduced	Homeotherm	Oryctolagus_cuniculus	78.0341
MA0073.2	Highly_Reduced	Homeotherm	Otolemur_garnettii	76.028
MA0073.2	Highly_Reduced	Homeotherm	Pan_troglodytes	78.4516
MA0073.2	Highly_Reduced	Homeotherm	Panthera_leo	86.9609
MA0073.2	Highly_Reduced	Homeotherm	Papio_anubis	78.0313
MA0073.2	Highly_Reduced	Homeotherm	Parus_major	73.4049
MA0073.2	Highly_Reduced	Homeotherm	Pavo_cristatus	77.2805
MA0073.2	Highly_Reduced	Homeotherm	Phascolarctos_cinereus	77.0851
MA0073.2	Highly_Reduced	Homeotherm	Phasianus_colchicus	80.2489
MA0073.2	Highly_Reduced	Homeotherm	Physeter_catodon	79.6721
MA0073.2	Highly_Reduced	Homeotherm	Piliocolobus_tephrosceles	79.9868
MA0073.2	Highly_Reduced	Homeotherm	Pongo_abelii	77.7685
MA0073.2	Highly_Reduced	Homeotherm	Prolemur_simus	75.0785
MA0073.2	Highly_Reduced	Homeotherm	Pteropus_vampyrus	77.4817
MA0073.2	Highly_Reduced	Homeotherm	Rattus_norvegicus	77.7563
MA0073.2	Highly_Reduced	Homeotherm	Rhinolophus_ferrumequinum	78.0554
MA0073.2	Highly_Reduced	Homeotherm	Rhinopithecus_roxellana	76.1488
MA0073.2	Highly_Reduced	Homeotherm	Sarcophilus_harrisii	85.0562
MA0073.2	Highly_Reduced	Homeotherm	Sciurus_vulgaris	78.2191
MA0073.2	Highly_Reduced	Homeotherm	Serinus_canaria	69.0383
MA0073.2	Highly_Reduced	Homeotherm	Sorex_araneus	75.5201
MA0073.2	Highly_Reduced	Homeotherm	Stachyris_ruficeps	72.3386
MA0073.2	Highly_Reduced	Homeotherm	Strigops_habroptila	76.1425
MA0073.2	Highly_Reduced	Homeotherm	Strix_occidentalis_caurina	82.7846
MA0073.2	Highly_Reduced	Homeotherm	Struthio_camelus_australis	76.4011
MA0073.2	Highly_Reduced	Homeotherm	Sus_scrofa	78.0593
MA0073.2	Highly_Reduced	Homeotherm	Taeniopygia_guttata	70.9538
MA0073.2	Highly_Reduced	Homeotherm	Tupaia_belangeri	75.0618
MA0073.2	Highly_Reduced	Homeotherm	Urocitellus_parryii	79.1206
MA0073.2	Highly_Reduced	Homeotherm	Ursus_maritimus	76.3247
MA0073.2	Highly_Reduced	Homeotherm	Vulpes_vulpes	79.0811
MA0073.2	Highly_Reduced	Homeotherm	Zalophus_californianus	81.7192
MA0073.2	Highly_Reduced	Homeotherm	Zonotrichia_albicollis	69.4664
MA0073.2	Highly_Reduced	Poikilotherm	Anolis_carolinensis	75.0527
MA0073.2	Highly_Reduced	Poikilotherm	Chelonoidis_abingdonii	73.6497
MA0073.2	Highly_Reduced	Poikilotherm	Chelydra_serpentina	78.6958
MA0073.2	Highly_Reduced	Poikilotherm	Chrysemys_picta_bellii	73.3944
MA0073.2	Highly_Reduced	Poikilotherm	Crocodylus_porosus	72.8349
MA0073.2	Highly_Reduced	Poikilotherm	Erpetoichthys_calabaricus	79.6999
MA0073.2	Highly_Reduced	Poikilotherm	Gopherus_evgoodei	73.818
MA0073.2	Highly_Reduced	Poikilotherm	Laticauda_laticaudata	77.7943
MA0073.2	Highly_Reduced	Poikilotherm	Latimeria_chalumnae	68.3852
MA0073.2	Highly_Reduced	Poikilotherm	Leptobrachium_leishanense	70.8721
MA0073.2	Highly_Reduced	Poikilotherm	Naja_naja	74.5463
MA0073.2	Highly_Reduced	Poikilotherm	Notechis_scutatus	84.8018
MA0073.2	Highly_Reduced	Poikilotherm	Pelodiscus_sinensis	77.2459
MA0073.2	Highly_Reduced	Poikilotherm	Pelusios_castaneus	75.9033
MA0073.2	Highly_Reduced	Poikilotherm	Podarcis_muralis	72.7007
MA0073.2	Highly_Reduced	Poikilotherm	Pseudonaja_textilis
MA0073.2	Highly_Reduced	Poikilotherm	Pseudonaja_textlis	84.1621
MA0073.2	Highly_Reduced	Poikilotherm	Salvator_merianae	76.5884
MA0073.2	Highly_Reduced	Poikilotherm	Sphenodon_punctatus	74.8826
MA0073.2	Highly_Reduced	Poikilotherm	Terrapene_carolina_triunguis	79.0074
MA0073.2	Highly_Reduced	Poikilotherm	Varanus_komodoensis	81.7484
MA0073.2	Highly_Reduced	Poikilotherm	Xenopus_tropicalis	72.8134
MA0076.3	Highly_Enriched	Homeotherm	Amazona_collaria		69.9482
MA0076.3	Highly_Enriched	Homeotherm	Anas_platyrhynchos		66.6569
MA0076.3	Highly_Enriched	Homeotherm	Aotus_nancymaae		64.3947
MA0076.3	Highly_Enriched	Homeotherm	Apteryx_haastii		67.4538
MA0076.3	Highly_Enriched	Homeotherm	Aquila_chrysaetos		67.626
MA0076.3	Highly_Enriched	Homeotherm	Athene_cunicularia		64.255
MA0076.3	Highly_Enriched	Homeotherm	Balaenoptera_musculus		65.5133
MA0076.3	Highly_Enriched	Homeotherm	Bison_bison		65.0099
MA0076.3	Highly_Enriched	Homeotherm	Bos_taurus		65.6688
MA0076.3	Highly_Enriched	Homeotherm	Cairina_moschata		67.861
MA0076.3	Highly_Enriched	Homeotherm	Calidris_pugnax		65.469
MA0076.3	Highly_Enriched	Homeotherm	Callithrix_jacchus		64.0863
MA0076.3	Highly_Enriched	Homeotherm	Camelus_dromedarius		65.5238
MA0076.3	Highly_Enriched	Homeotherm	Canis_lupus		65.8177
MA0076.3	Highly_Enriched	Homeotherm	Carlito_syrichta		65.137
MA0076.3	Highly_Enriched	Homeotherm	Castor_canadensis		63.0412
MA0076.3	Highly_Enriched	Homeotherm	Catharus_ustulatus		63.4658
MA0076.3	Highly_Enriched	Homeotherm	Cebus_imitator		64.4868
MA0076.3	Highly_Enriched	Homeotherm	Cercocebus_atys		64.4401
MA0076.3	Highly_Enriched	Homeotherm	Cervus_hanglu		65.3809
MA0076.3	Highly_Enriched	Homeotherm	Choloepus_hoffmanni		63.7552
MA0076.3	Highly_Enriched	Homeotherm	Corvus_moneduloides		66.716
MA0076.3	Highly_Enriched	Homeotherm	Coturnix_japonica		64.0726
MA0076.3	Highly_Enriched	Homeotherm	Delphinapterus_leucas		65.452
MA0076.3	Highly_Enriched	Homeotherm	Echinops_telfairi		64.6375
MA0076.3	Highly_Enriched	Homeotherm	Equus_asinus		64.9449
MA0076.3	Highly_Enriched	Homeotherm	Equus_caballus		65.172
MA0076.3	Highly_Enriched	Homeotherm	Erinaceus_europaeus		63.839
MA0076.3	Highly_Enriched	Homeotherm	Felis_catus		65.3527
MA0076.3	Highly_Enriched	Homeotherm	Ficedula_albicollis		65.0695
MA0076.3	Highly_Enriched	Homeotherm	Gallus_gallus		66.2255
MA0076.3	Highly_Enriched	Homeotherm	Geospiza_fortis		60.5772
MA0076.3	Highly_Enriched	Homeotherm	Gorilla_gorilla		64.025
MA0076.3	Highly_Enriched	Homeotherm	Homo_sapiens		64.9033
MA0076.3	Highly_Enriched	Homeotherm	Jaculus_jaculus		63.722
MA0076.3	Highly_Enriched	Homeotherm	Loxodonta_africana		64.2909
MA0076.3	Highly_Enriched	Homeotherm	Lynx_canadensis		64.3482
MA0076.3	Highly_Enriched	Homeotherm	Macaca_mulatta		64.8817
MA0076.3	Highly_Enriched	Homeotherm	Manacus_vitellinus		66.1613
MA0076.3	Highly_Enriched	Homeotherm	Meleagris_gallopavo		63.7864
MA0076.3	Highly_Enriched	Homeotherm	Meriones_unguiculatus		63.6355
MA0076.3	Highly_Enriched	Homeotherm	Microcebus_murinus		65.8502
MA0076.3	Highly_Enriched	Homeotherm	Monodelphis_domestica		64.2895
MA0076.3	Highly_Enriched	Homeotherm	Mus_musculus		61.4632
MA0076.3	Highly_Enriched	Homeotherm	Mus_pahari		61.4976
MA0076.3	Highly_Enriched	Homeotherm	Nannospalax_galili		62.8154
MA0076.3	Highly_Enriched	Homeotherm	Neovison_vison		65.2006
MA0076.3	Highly_Enriched	Homeotherm	Notamacropus_eugenii		62.613
MA0076.3	Highly_Enriched	Homeotherm	Nothoprocta_perdicaria		67.3653
MA0076.3	Highly_Enriched	Homeotherm	Numida_meleagris		66.5504
MA0076.3	Highly_Enriched	Homeotherm	Ornithorhynchus_anatinus		67.6281
MA0076.3	Highly_Enriched	Homeotherm	Oryctolagus_cuniculus		65.6989
MA0076.3	Highly_Enriched	Homeotherm	Otolemur_garnettii		63.508
MA0076.3	Highly_Enriched	Homeotherm	Pan_troglodytes		64.5889
MA0076.3	Highly_Enriched	Homeotherm	Panthera_leo		66.0113
MA0076.3	Highly_Enriched	Homeotherm	Papio_anubis		64.0978
MA0076.3	Highly_Enriched	Homeotherm	Parus_major		65.1914
MA0076.3	Highly_Enriched	Homeotherm	Pavo_cristatus		66.8561
MA0076.3	Highly_Enriched	Homeotherm	Phascolarctos_cinereus		62.6067
MA0076.3	Highly_Enriched	Homeotherm	Phasianus_colchicus		67.144
MA0076.3	Highly_Enriched	Homeotherm	Physeter_catodon		65.8488
MA0076.3	Highly_Enriched	Homeotherm	Piliocolobus_tephrosceles		64.2778
MA0076.3	Highly_Enriched	Homeotherm	Pongo_abelii		64.3399
MA0076.3	Highly_Enriched	Homeotherm	Prolemur_simus		65.2161
MA0076.3	Highly_Enriched	Homeotherm	Pteropus_vampyrus		65.8459
MA0076.3	Highly_Enriched	Homeotherm	Rattus_norvegicus		65.6923
MA0076.3	Highly_Enriched	Homeotherm	Rhinolophus_ferrumequinum		64.0132
MA0076.3	Highly_Enriched	Homeotherm	Rhinopithecus_roxellana		63.9627
MA0076.3	Highly_Enriched	Homeotherm	Sarcophilus_harrisii		65.6516
MA0076.3	Highly_Enriched	Homeotherm	Sciurus_vulgaris		64.5565
MA0076.3	Highly_Enriched	Homeotherm	Serinus_canaria		62.8619
MA0076.3	Highly_Enriched	Homeotherm	Sorex_araneus		65.4607
MA0076.3	Highly_Enriched	Homeotherm	Stachyris_ruficeps		65.5952
MA0076.3	Highly_Enriched	Homeotherm	Strigops_habroptila		68.1631
MA0076.3	Highly_Enriched	Homeotherm	Strix_occidentalis		66.747
MA0076.3	Highly_Enriched	Homeotherm	Struthio_camelus		65.1509
MA0076.3	Highly_Enriched	Homeotherm	Sus_scrofa		65.5881
MA0076.3	Highly_Enriched	Homeotherm	Taeniopygia_guttata		62.7524
MA0076.3	Highly_Enriched	Homeotherm	Tupaia_belangeri		64.6436
MA0076.3	Highly_Enriched	Homeotherm	Urocitellus_parryii		63.106
MA0076.3	Highly_Enriched	Homeotherm	Ursus_maritimus		64.6016
MA0076.3	Highly_Enriched	Homeotherm	Vulpes_vulpes		65.4039
MA0076.3	Highly_Enriched	Homeotherm	Zalophus_californianus		65.5361
MA0076.3	Highly_Enriched	Homeotherm	Zonotrichia_albicollis		61.5512
MA0076.3	Highly_Enriched	Poikilotherm	Anolis_carolinensis		64.4124
MA0076.3	Highly_Enriched	Poikilotherm	Chelonoidis_abingdonii		61.9671
MA0076.3	Highly_Enriched	Poikilotherm	Chelydra_serpentina		64.4228
MA0076.3	Highly_Enriched	Poikilotherm	Chrysemys_picta		62.4518
MA0076.3	Highly_Enriched	Poikilotherm	Crocodylus_porosus		63.5693
MA0076.3	Highly_Enriched	Poikilotherm	Erpetoichthys_calabaricus		62.5724
MA0076.3	Highly_Enriched	Poikilotherm	Gopherus_evgoodei		61.8483
MA0076.3	Highly_Enriched	Poikilotherm	Laticauda_laticaudata		67.7435
MA0076.3	Highly_Enriched	Poikilotherm	Latimeria_chalumnae		61.793
MA0076.3	Highly_Enriched	Poikilotherm	Leptobrachium_leishanense		61.331
MA0076.3	Highly_Enriched	Poikilotherm	Naja_naja		64.7484
MA0076.3	Highly_Enriched	Poikilotherm	Notechis_scutatus		65.9487
MA0076.3	Highly_Enriched	Poikilotherm	Pelodiscus_sinensis		65.4383
MA0076.3	Highly_Enriched	Poikilotherm	Pelusios_castaneus		63.494
MA0076.3	Highly_Enriched	Poikilotherm	Podarcis_muralis		66.3844
MA0076.3	Highly_Enriched	Poikilotherm	Pseudonaja_textilis		66.2988
MA0076.3	Highly_Enriched	Poikilotherm	Salvator_merianae		62.9764
MA0076.3	Highly_Enriched	Poikilotherm	Sphenodon_punctatus		65.6612
MA0076.3	Highly_Enriched	Poikilotherm	Terrapene_carolina		63.4814
MA0076.3	Highly_Enriched	Poikilotherm	Varanus_komodoensis		67.6617
MA0076.3	Highly_Enriched	Poikilotherm	Xenopus_tropicalis		59.0917
MA0079.5	Moderately_Reduced	Homeotherm	Amazona_collaria	94.9433
MA0079.5	Moderately_Reduced	Homeotherm	Anas_platyrhynchos	95.408
MA0079.5	Moderately_Reduced	Homeotherm	Anas_platyrhynchos_platyrhynchos
MA0079.5	Moderately_Reduced	Homeotherm	Aotus_nancymaae	92.5397
MA0079.5	Moderately_Reduced	Homeotherm	Apteryx_haastii	94.4735
MA0079.5	Moderately_Reduced	Homeotherm	Aquila_chrysaetos	91.7461
MA0079.5	Moderately_Reduced	Homeotherm	Aquila_chrysaetos_chrysaetos
MA0079.5	Moderately_Reduced	Homeotherm	Athene_cunicularia	92.2747
MA0079.5	Moderately_Reduced	Homeotherm	Balaenoptera_musculus	93.1243
MA0079.5	Moderately_Reduced	Homeotherm	Bison_bison_bison	91.1733
MA0079.5	Moderately_Reduced	Homeotherm	Bos_taurus	93.1222
MA0079.5	Moderately_Reduced	Homeotherm	Cairina_moschata_domestica	95.6135
MA0079.5	Moderately_Reduced	Homeotherm	Calidris_pugnax	93.5666
MA0079.5	Moderately_Reduced	Homeotherm	Callithrix_jacchus	92.6113
MA0079.5	Moderately_Reduced	Homeotherm	Camelus_dromedarius	92.7971
MA0079.5	Moderately_Reduced	Homeotherm	Canis_lupus_familiaris	99.2558
MA0079.5	Moderately_Reduced	Homeotherm	Carlito_syrichta	92.1664
MA0079.5	Moderately_Reduced	Homeotherm	Castor_canadensis	93.0134
MA0079.5	Moderately_Reduced	Homeotherm	Catharus_ustulatus	94.1058
MA0079.5	Moderately_Reduced	Homeotherm	Cebus_imitator	93.0475
MA0079.5	Moderately_Reduced	Homeotherm	Cercocebus_atys	92.752
MA0079.5	Moderately_Reduced	Homeotherm	Cervus_hanglu_yarkandensis	93.196
MA0079.5	Moderately_Reduced	Homeotherm	Choloepus_hoffmanni	91.3338
MA0079.5	Moderately_Reduced	Homeotherm	Corvus_moneduloides	95.1908
MA0079.5	Moderately_Reduced	Homeotherm	Coturnix_japonica	94.3878
MA0079.5	Moderately_Reduced	Homeotherm	Delphinapterus_leucas	93.1195
MA0079.5	Moderately_Reduced	Homeotherm	Echinops_telfairi	92.2667
MA0079.5	Moderately_Reduced	Homeotherm	Equus_asinus	92.0831
MA0079.5	Moderately_Reduced	Homeotherm	Equus_caballus	91.8417
MA0079.5	Moderately_Reduced	Homeotherm	Erinaceus_europaeus	92.9781
MA0079.5	Moderately_Reduced	Homeotherm	Felis_catus	96.2157
MA0079.5	Moderately_Reduced	Homeotherm	Ficedula_albicollis	88.673
MA0079.5	Moderately_Reduced	Homeotherm	Gallus_gallus	90.7445
MA0079.5	Moderately_Reduced	Homeotherm	Geospiza_fortis	90.2661
MA0079.5	Moderately_Reduced	Homeotherm	Gorilla_gorilla	92.2382
MA0079.5	Moderately_Reduced	Homeotherm	Homo_sapiens	98.8352
MA0079.5	Moderately_Reduced	Homeotherm	Jaculus_jaculus	92.768
MA0079.5	Moderately_Reduced	Homeotherm	Loxodonta_africana	92.2382
MA0079.5	Moderately_Reduced	Homeotherm	Lynx_canadensis	91.087
MA0079.5	Moderately_Reduced	Homeotherm	Macaca_mulatta	92.7548
MA0079.5	Moderately_Reduced	Homeotherm	Manacus_vitellinus	93.1154
MA0079.5	Moderately_Reduced	Homeotherm	Meleagris_gallopavo	90.154
MA0079.5	Moderately_Reduced	Homeotherm	Meriones_unguiculatus	93.5883
MA0079.5	Moderately_Reduced	Homeotherm	Microcebus_murinus	93.2327
MA0079.5	Moderately_Reduced	Homeotherm	Monodelphis_domestica	92.0644
MA0079.5	Moderately_Reduced	Homeotherm	Mus_musculus	90.2458
MA0079.5	Moderately_Reduced	Homeotherm	Mus_pahari	91.3138
MA0079.5	Moderately_Reduced	Homeotherm	Nannospalax_galili	93.2485
MA0079.5	Moderately_Reduced	Homeotherm	Neovison_vison	92.123
MA0079.5	Moderately_Reduced	Homeotherm	Notamacropus_eugenii	91.3975
MA0079.5	Moderately_Reduced	Homeotherm	Nothoprocta_perdicaria	94.4855
MA0079.5	Moderately_Reduced	Homeotherm	Numida_meleagris	94.099
MA0079.5	Moderately_Reduced	Homeotherm	Ornithorhynchus_anatinus	89.7826
MA0079.5	Moderately_Reduced	Homeotherm	Oryctolagus_cuniculus	92.8928
MA0079.5	Moderately_Reduced	Homeotherm	Otolemur_garnettii	92.3524
MA0079.5	Moderately_Reduced	Homeotherm	Pan_troglodytes	93.0253
MA0079.5	Moderately_Reduced	Homeotherm	Panthera_leo	95.3953
MA0079.5	Moderately_Reduced	Homeotherm	Papio_anubis	92.7313
MA0079.5	Moderately_Reduced	Homeotherm	Parus_major	93.96
MA0079.5	Moderately_Reduced	Homeotherm	Pavo_cristatus	94.2766
MA0079.5	Moderately_Reduced	Homeotherm	Phascolarctos_cinereus	91.25
MA0079.5	Moderately_Reduced	Homeotherm	Phasianus_colchicus	94.9293
MA0079.5	Moderately_Reduced	Homeotherm	Physeter_catodon	93.0326
MA0079.5	Moderately_Reduced	Homeotherm	Piliocolobus_tephrosceles	93.247
MA0079.5	Moderately_Reduced	Homeotherm	Pongo_abelii	92.9613
MA0079.5	Moderately_Reduced	Homeotherm	Prolemur_simus	92.5057
MA0079.5	Moderately_Reduced	Homeotherm	Pteropus_vampyrus	92.6119
MA0079.5	Moderately_Reduced	Homeotherm	Rattus_norvegicus	92.8877
MA0079.5	Moderately_Reduced	Homeotherm	Rhinolophus_ferrumequinum	92.8976
MA0079.5	Moderately_Reduced	Homeotherm	Rhinopithecus_roxellana	92.0537
MA0079.5	Moderately_Reduced	Homeotherm	Sarcophilus_harrisii	88.7604
MA0079.5	Moderately_Reduced	Homeotherm	Sciurus_vulgaris	93.5817
MA0079.5	Moderately_Reduced	Homeotherm	Serinus_canaria	91.8994
MA0079.5	Moderately_Reduced	Homeotherm	Sorex_araneus	92.2121
MA0079.5	Moderately_Reduced	Homeotherm	Stachyris_ruficeps	94.5991
MA0079.5	Moderately_Reduced	Homeotherm	Strigops_habroptila	95.0017
MA0079.5	Moderately_Reduced	Homeotherm	Strix_occidentalis_caurina	95.1827
MA0079.5	Moderately_Reduced	Homeotherm	Struthio_camelus_australis	93.355
MA0079.5	Moderately_Reduced	Homeotherm	Sus_scrofa	93.2013
MA0079.5	Moderately_Reduced	Homeotherm	Taeniopygia_guttata	91.9117
MA0079.5	Moderately_Reduced	Homeotherm	Tupaia_belangeri	92.0596
MA0079.5	Moderately_Reduced	Homeotherm	Urocitellus_parryii	93.5013
MA0079.5	Moderately_Reduced	Homeotherm	Ursus_maritimus	91.0064
MA0079.5	Moderately_Reduced	Homeotherm	Vulpes_vulpes	93.4918
MA0079.5	Moderately_Reduced	Homeotherm	Zalophus_californianus	93.9077
MA0079.5	Moderately_Reduced	Homeotherm	Zonotrichia_albicollis	93.6452
MA0079.5	Moderately_Reduced	Poikilotherm	Anolis_carolinensis	94.9512
MA0079.5	Moderately_Reduced	Poikilotherm	Chelonoidis_abingdonii	91.6103
MA0079.5	Moderately_Reduced	Poikilotherm	Chelydra_serpentina	94.0192
MA0079.5	Moderately_Reduced	Poikilotherm	Chrysemys_picta_bellii	92.3145
MA0079.5	Moderately_Reduced	Poikilotherm	Crocodylus_porosus	92.4851
MA0079.5	Moderately_Reduced	Poikilotherm	Erpetoichthys_calabaricus	96.5059
MA0079.5	Moderately_Reduced	Poikilotherm	Gopherus_evgoodei	92.3103
MA0079.5	Moderately_Reduced	Poikilotherm	Laticauda_laticaudata	94.9936
MA0079.5	Moderately_Reduced	Poikilotherm	Latimeria_chalumnae	95.9686
MA0079.5	Moderately_Reduced	Poikilotherm	Leptobrachium_leishanense	95.1816
MA0079.5	Moderately_Reduced	Poikilotherm	Naja_naja	91.1788
MA0079.5	Moderately_Reduced	Poikilotherm	Notechis_scutatus	95.8613
MA0079.5	Moderately_Reduced	Poikilotherm	Pelodiscus_sinensis	92.4522
MA0079.5	Moderately_Reduced	Poikilotherm	Pelusios_castaneus	93.3001
MA0079.5	Moderately_Reduced	Poikilotherm	Podarcis_muralis	93.0987
MA0079.5	Moderately_Reduced	Poikilotherm	Pseudonaja_textilis
MA0079.5	Moderately_Reduced	Poikilotherm	Pseudonaja_textlis	95.331
MA0079.5	Moderately_Reduced	Poikilotherm	Salvator_merianae	93.0124
MA0079.5	Moderately_Reduced	Poikilotherm	Sphenodon_punctatus	93.3621
MA0079.5	Moderately_Reduced	Poikilotherm	Terrapene_carolina_triunguis	93.7866
MA0079.5	Moderately_Reduced	Poikilotherm	Varanus_komodoensis	95.1422
MA0079.5	Moderately_Reduced	Poikilotherm	Xenopus_tropicalis	94.7214
MA0080.7	Highly_Reduced	Homeotherm	Amazona_collaria	63.4647
MA0080.7	Highly_Reduced	Homeotherm	Anas_platyrhynchos	64.5856
MA0080.7	Highly_Reduced	Homeotherm	Anas_platyrhynchos_platyrhynchos
MA0080.7	Highly_Reduced	Homeotherm	Aotus_nancymaae	62.9065
MA0080.7	Highly_Reduced	Homeotherm	Apteryx_haastii	65.318
MA0080.7	Highly_Reduced	Homeotherm	Aquila_chrysaetos	65.7697
MA0080.7	Highly_Reduced	Homeotherm	Aquila_chrysaetos_chrysaetos
MA0080.7	Highly_Reduced	Homeotherm	Athene_cunicularia	64.2767
MA0080.7	Highly_Reduced	Homeotherm	Balaenoptera_musculus	63.379
MA0080.7	Highly_Reduced	Homeotherm	Bison_bison_bison	61.5214
MA0080.7	Highly_Reduced	Homeotherm	Bos_taurus	62.5341
MA0080.7	Highly_Reduced	Homeotherm	Cairina_moschata_domestica	64.597
MA0080.7	Highly_Reduced	Homeotherm	Calidris_pugnax	64.2253
MA0080.7	Highly_Reduced	Homeotherm	Callithrix_jacchus	62.8733
MA0080.7	Highly_Reduced	Homeotherm	Camelus_dromedarius	62.9533
MA0080.7	Highly_Reduced	Homeotherm	Canis_lupus_familiaris	64.4437
MA0080.7	Highly_Reduced	Homeotherm	Carlito_syrichta	62.242
MA0080.7	Highly_Reduced	Homeotherm	Castor_canadensis	62.5074
MA0080.7	Highly_Reduced	Homeotherm	Catharus_ustulatus	63.1422
MA0080.7	Highly_Reduced	Homeotherm	Cebus_imitator	62.9139
MA0080.7	Highly_Reduced	Homeotherm	Cercocebus_atys	62.8893
MA0080.7	Highly_Reduced	Homeotherm	Cervus_hanglu_yarkandensis	62.7026
MA0080.7	Highly_Reduced	Homeotherm	Choloepus_hoffmanni	62.5108
MA0080.7	Highly_Reduced	Homeotherm	Corvus_moneduloides	64.0226
MA0080.7	Highly_Reduced	Homeotherm	Coturnix_japonica	63.898
MA0080.7	Highly_Reduced	Homeotherm	Delphinapterus_leucas	62.8658
MA0080.7	Highly_Reduced	Homeotherm	Echinops_telfairi	61.7237
MA0080.7	Highly_Reduced	Homeotherm	Equus_asinus	63.0319
MA0080.7	Highly_Reduced	Homeotherm	Equus_caballus	59.7846
MA0080.7	Highly_Reduced	Homeotherm	Erinaceus_europaeus	61.8925
MA0080.7	Highly_Reduced	Homeotherm	Felis_catus	63.1859
MA0080.7	Highly_Reduced	Homeotherm	Ficedula_albicollis	62.9642
MA0080.7	Highly_Reduced	Homeotherm	Gallus_gallus	63.5386
MA0080.7	Highly_Reduced	Homeotherm	Geospiza_fortis	61.9663
MA0080.7	Highly_Reduced	Homeotherm	Gorilla_gorilla	62.3987
MA0080.7	Highly_Reduced	Homeotherm	Homo_sapiens	63.221
MA0080.7	Highly_Reduced	Homeotherm	Jaculus_jaculus	62.5372
MA0080.7	Highly_Reduced	Homeotherm	Loxodonta_africana	62.0017
MA0080.7	Highly_Reduced	Homeotherm	Lynx_canadensis	63.3731
MA0080.7	Highly_Reduced	Homeotherm	Macaca_mulatta	62.6181
MA0080.7	Highly_Reduced	Homeotherm	Manacus_vitellinus	61.7771
MA0080.7	Highly_Reduced	Homeotherm	Meleagris_gallopavo	62.4719
MA0080.7	Highly_Reduced	Homeotherm	Meriones_unguiculatus	61.8739
MA0080.7	Highly_Reduced	Homeotherm	Microcebus_murinus	63.1735
MA0080.7	Highly_Reduced	Homeotherm	Monodelphis_domestica	61.3894
MA0080.7	Highly_Reduced	Homeotherm	Mus_musculus	62.1049
MA0080.7	Highly_Reduced	Homeotherm	Mus_pahari	61.3051
MA0080.7	Highly_Reduced	Homeotherm	Nannospalax_galili	62.2818
MA0080.7	Highly_Reduced	Homeotherm	Neovison_vison	62.5958
MA0080.7	Highly_Reduced	Homeotherm	Notamacropus_eugenii	62.4337
MA0080.7	Highly_Reduced	Homeotherm	Nothoprocta_perdicaria	64.6884
MA0080.7	Highly_Reduced	Homeotherm	Numida_meleagris	62.9336
MA0080.7	Highly_Reduced	Homeotherm	Ornithorhynchus_anatinus	63.8465
MA0080.7	Highly_Reduced	Homeotherm	Oryctolagus_cuniculus	63.5127
MA0080.7	Highly_Reduced	Homeotherm	Otolemur_garnettii	61.8657
MA0080.7	Highly_Reduced	Homeotherm	Pan_troglodytes	62.8517
MA0080.7	Highly_Reduced	Homeotherm	Panthera_leo	63.2975
MA0080.7	Highly_Reduced	Homeotherm	Papio_anubis	62.9043
MA0080.7	Highly_Reduced	Homeotherm	Parus_major	63.5972
MA0080.7	Highly_Reduced	Homeotherm	Pavo_cristatus	63.5433
MA0080.7	Highly_Reduced	Homeotherm	Phascolarctos_cinereus	62.5514
MA0080.7	Highly_Reduced	Homeotherm	Phasianus_colchicus	63.6532
MA0080.7	Highly_Reduced	Homeotherm	Physeter_catodon	63.5462
MA0080.7	Highly_Reduced	Homeotherm	Piliocolobus_tephrosceles	62.3703
MA0080.7	Highly_Reduced	Homeotherm	Pongo_abelii	62.852
MA0080.7	Highly_Reduced	Homeotherm	Prolemur_simus	62.6828
MA0080.7	Highly_Reduced	Homeotherm	Pteropus_vampyrus	62.2226
MA0080.7	Highly_Reduced	Homeotherm	Rattus_norvegicus	62.2646
MA0080.7	Highly_Reduced	Homeotherm	Rhinolophus_ferrumequinum	62.2187
MA0080.7	Highly_Reduced	Homeotherm	Rhinopithecus_roxellana	62.2302
MA0080.7	Highly_Reduced	Homeotherm	Sarcophilus_harrisii	62.1109
MA0080.7	Highly_Reduced	Homeotherm	Sciurus_vulgaris	62.5785
MA0080.7	Highly_Reduced	Homeotherm	Serinus_canaria	62.7611
MA0080.7	Highly_Reduced	Homeotherm	Sorex_araneus	62.1644
MA0080.7	Highly_Reduced	Homeotherm	Stachyris_ruficeps	63.9683
MA0080.7	Highly_Reduced	Homeotherm	Strigops_habroptila	63.8244
MA0080.7	Highly_Reduced	Homeotherm	Strix_occidentalis_caurina	64.8561
MA0080.7	Highly_Reduced	Homeotherm	Struthio_camelus_australis	63.3434
MA0080.7	Highly_Reduced	Homeotherm	Sus_scrofa	63.5764
MA0080.7	Highly_Reduced	Homeotherm	Taeniopygia_guttata	62.5933
MA0080.7	Highly_Reduced	Homeotherm	Tupaia_belangeri	61.5385
MA0080.7	Highly_Reduced	Homeotherm	Urocitellus_parryii	62.7855
MA0080.7	Highly_Reduced	Homeotherm	Ursus_maritimus	61.9791
MA0080.7	Highly_Reduced	Homeotherm	Vulpes_vulpes	63.1682
MA0080.7	Highly_Reduced	Homeotherm	Zalophus_californianus	63.1267
MA0080.7	Highly_Reduced	Homeotherm	Zonotrichia_albicollis	62.6439
MA0080.7	Highly_Reduced	Poikilotherm	Anolis_carolinensis	62.0652
MA0080.7	Highly_Reduced	Poikilotherm	Chelonoidis_abingdonii	63.4878
MA0080.7	Highly_Reduced	Poikilotherm	Chelydra_serpentina	63.9846
MA0080.7	Highly_Reduced	Poikilotherm	Chrysemys_picta_bellii	64.6251
MA0080.7	Highly_Reduced	Poikilotherm	Crocodylus_porosus	64.0996
MA0080.7	Highly_Reduced	Poikilotherm	Erpetoichthys_calabaricus	62.7682
MA0080.7	Highly_Reduced	Poikilotherm	Gopherus_evgoodei	63.7869
MA0080.7	Highly_Reduced	Poikilotherm	Laticauda_laticaudata	63.1052
MA0080.7	Highly_Reduced	Poikilotherm	Latimeria_chalumnae	61.974
MA0080.7	Highly_Reduced	Poikilotherm	Leptobrachium_leishanense	60.2065
MA0080.7	Highly_Reduced	Poikilotherm	Naja_naja	63.0104
MA0080.7	Highly_Reduced	Poikilotherm	Notechis_scutatus	62.8065
MA0080.7	Highly_Reduced	Poikilotherm	Pelodiscus_sinensis	63.8023
MA0080.7	Highly_Reduced	Poikilotherm	Pelusios_castaneus	63.1866
MA0080.7	Highly_Reduced	Poikilotherm	Podarcis_muralis	62.9509
MA0080.7	Highly_Reduced	Poikilotherm	Pseudonaja_textilis
MA0080.7	Highly_Reduced	Poikilotherm	Pseudonaja_textlis	62.9396
MA0080.7	Highly_Reduced	Poikilotherm	Salvator_merianae	63.4004
MA0080.7	Highly_Reduced	Poikilotherm	Sphenodon_punctatus	61.9792
MA0080.7	Highly_Reduced	Poikilotherm	Terrapene_carolina_triunguis	63.8296
MA0080.7	Highly_Reduced	Poikilotherm	Varanus_komodoensis	63.3828
MA0080.7	Highly_Reduced	Poikilotherm	Xenopus_tropicalis	60.9307
MA0081.3	Highly_Reduced	Homeotherm	Amazona_collaria	64.4252
MA0081.3	Highly_Reduced	Homeotherm	Anas_platyrhynchos	64.2661
MA0081.3	Highly_Reduced	Homeotherm	Anas_platyrhynchos_platyrhynchos
MA0081.3	Highly_Reduced	Homeotherm	Aotus_nancymaae	63.2049
MA0081.3	Highly_Reduced	Homeotherm	Apteryx_haastii	66.2269
MA0081.3	Highly_Reduced	Homeotherm	Aquila_chrysaetos	65.9072
MA0081.3	Highly_Reduced	Homeotherm	Aquila_chrysaetos_chrysaetos
MA0081.3	Highly_Reduced	Homeotherm	Athene_cunicularia	64.2056
MA0081.3	Highly_Reduced	Homeotherm	Balaenoptera_musculus	63.8731
MA0081.3	Highly_Reduced	Homeotherm	Bison_bison_bison	62.5741
MA0081.3	Highly_Reduced	Homeotherm	Bos_taurus	63.3651
MA0081.3	Highly_Reduced	Homeotherm	Cairina_moschata_domestica	64.442
MA0081.3	Highly_Reduced	Homeotherm	Calidris_pugnax	64.8328
MA0081.3	Highly_Reduced	Homeotherm	Callithrix_jacchus	63.0928
MA0081.3	Highly_Reduced	Homeotherm	Camelus_dromedarius	63.2513
MA0081.3	Highly_Reduced	Homeotherm	Canis_lupus_familiaris	64.6303
MA0081.3	Highly_Reduced	Homeotherm	Carlito_syrichta	62.9415
MA0081.3	Highly_Reduced	Homeotherm	Castor_canadensis	62.9266
MA0081.3	Highly_Reduced	Homeotherm	Catharus_ustulatus	63.1487
MA0081.3	Highly_Reduced	Homeotherm	Cebus_imitator	63.4842
MA0081.3	Highly_Reduced	Homeotherm	Cercocebus_atys	63.5035
MA0081.3	Highly_Reduced	Homeotherm	Cervus_hanglu_yarkandensis	63.3276
MA0081.3	Highly_Reduced	Homeotherm	Choloepus_hoffmanni	62.9893
MA0081.3	Highly_Reduced	Homeotherm	Corvus_moneduloides	64.4874
MA0081.3	Highly_Reduced	Homeotherm	Coturnix_japonica	64.1316
MA0081.3	Highly_Reduced	Homeotherm	Delphinapterus_leucas	63.5556
MA0081.3	Highly_Reduced	Homeotherm	Echinops_telfairi	62.6024
MA0081.3	Highly_Reduced	Homeotherm	Equus_asinus	63.5596
MA0081.3	Highly_Reduced	Homeotherm	Equus_caballus	60.4843
MA0081.3	Highly_Reduced	Homeotherm	Erinaceus_europaeus	61.9168
MA0081.3	Highly_Reduced	Homeotherm	Felis_catus	63.5208
MA0081.3	Highly_Reduced	Homeotherm	Ficedula_albicollis	63.0751
MA0081.3	Highly_Reduced	Homeotherm	Gallus_gallus	63.9252
MA0081.3	Highly_Reduced	Homeotherm	Geospiza_fortis	62.4488
MA0081.3	Highly_Reduced	Homeotherm	Gorilla_gorilla	63.195
MA0081.3	Highly_Reduced	Homeotherm	Homo_sapiens	63.7176
MA0081.3	Highly_Reduced	Homeotherm	Jaculus_jaculus	62.4534
MA0081.3	Highly_Reduced	Homeotherm	Loxodonta_africana	62.6456
MA0081.3	Highly_Reduced	Homeotherm	Lynx_canadensis	63.9744
MA0081.3	Highly_Reduced	Homeotherm	Macaca_mulatta	63.3642
MA0081.3	Highly_Reduced	Homeotherm	Manacus_vitellinus	62.745
MA0081.3	Highly_Reduced	Homeotherm	Meleagris_gallopavo	63.3068
MA0081.3	Highly_Reduced	Homeotherm	Meriones_unguiculatus	61.9979
MA0081.3	Highly_Reduced	Homeotherm	Microcebus_murinus	63.4263
MA0081.3	Highly_Reduced	Homeotherm	Monodelphis_domestica	62.0873
MA0081.3	Highly_Reduced	Homeotherm	Mus_musculus	62.6209
MA0081.3	Highly_Reduced	Homeotherm	Mus_pahari	61.4437
MA0081.3	Highly_Reduced	Homeotherm	Nannospalax_galili	62.5809
MA0081.3	Highly_Reduced	Homeotherm	Neovison_vison	63.0329
MA0081.3	Highly_Reduced	Homeotherm	Notamacropus_eugenii	62.893
MA0081.3	Highly_Reduced	Homeotherm	Nothoprocta_perdicaria	65.0788
MA0081.3	Highly_Reduced	Homeotherm	Numida_meleagris	63.8344
MA0081.3	Highly_Reduced	Homeotherm	Ornithorhynchus_anatinus	64.5087
MA0081.3	Highly_Reduced	Homeotherm	Oryctolagus_cuniculus	63.9801
MA0081.3	Highly_Reduced	Homeotherm	Otolemur_garnettii	62.6671
MA0081.3	Highly_Reduced	Homeotherm	Pan_troglodytes	63.4766
MA0081.3	Highly_Reduced	Homeotherm	Panthera_leo	63.9291
MA0081.3	Highly_Reduced	Homeotherm	Papio_anubis	63.3259
MA0081.3	Highly_Reduced	Homeotherm	Parus_major	63.4744
MA0081.3	Highly_Reduced	Homeotherm	Pavo_cristatus	64.2236
MA0081.3	Highly_Reduced	Homeotherm	Phascolarctos_cinereus	63.2771
MA0081.3	Highly_Reduced	Homeotherm	Phasianus_colchicus	63.9927
MA0081.3	Highly_Reduced	Homeotherm	Physeter_catodon	63.7629
MA0081.3	Highly_Reduced	Homeotherm	Piliocolobus_tephrosceles	63.0421
MA0081.3	Highly_Reduced	Homeotherm	Pongo_abelii	63.3028
MA0081.3	Highly_Reduced	Homeotherm	Prolemur_simus	63.2394
MA0081.3	Highly_Reduced	Homeotherm	Pteropus_vampyrus	62.8004
MA0081.3	Highly_Reduced	Homeotherm	Rattus_norvegicus	62.6334
MA0081.3	Highly_Reduced	Homeotherm	Rhinolophus_ferrumequinum	62.6362
MA0081.3	Highly_Reduced	Homeotherm	Rhinopithecus_roxellana	62.9033
MA0081.3	Highly_Reduced	Homeotherm	Sarcophilus_harrisii	62.985
MA0081.3	Highly_Reduced	Homeotherm	Sciurus_vulgaris	63.2525
MA0081.3	Highly_Reduced	Homeotherm	Serinus_canaria	62.931
MA0081.3	Highly_Reduced	Homeotherm	Sorex_araneus	63.3473
MA0081.3	Highly_Reduced	Homeotherm	Stachyris_ruficeps	64.347
MA0081.3	Highly_Reduced	Homeotherm	Strigops_habroptila	64.8541
MA0081.3	Highly_Reduced	Homeotherm	Strix_occidentalis_caurina	65.7643
MA0081.3	Highly_Reduced	Homeotherm	Struthio_camelus_australis	64.6398
MA0081.3	Highly_Reduced	Homeotherm	Sus_scrofa	64.2684
MA0081.3	Highly_Reduced	Homeotherm	Taeniopygia_guttata	62.7266
MA0081.3	Highly_Reduced	Homeotherm	Tupaia_belangeri	61.4735
MA0081.3	Highly_Reduced	Homeotherm	Urocitellus_parryii	63.0442
MA0081.3	Highly_Reduced	Homeotherm	Ursus_maritimus	62.4979
MA0081.3	Highly_Reduced	Homeotherm	Vulpes_vulpes	63.2269
MA0081.3	Highly_Reduced	Homeotherm	Zalophus_californianus	63.3042
MA0081.3	Highly_Reduced	Homeotherm	Zonotrichia_albicollis	62.9778
MA0081.3	Highly_Reduced	Poikilotherm	Anolis_carolinensis	61.4397
MA0081.3	Highly_Reduced	Poikilotherm	Chelonoidis_abingdonii	64.1319
MA0081.3	Highly_Reduced	Poikilotherm	Chelydra_serpentina	64.353
MA0081.3	Highly_Reduced	Poikilotherm	Chrysemys_picta_bellii	65.7059
MA0081.3	Highly_Reduced	Poikilotherm	Crocodylus_porosus	64.4585
MA0081.3	Highly_Reduced	Poikilotherm	Erpetoichthys_calabaricus	63.3559
MA0081.3	Highly_Reduced	Poikilotherm	Gopherus_evgoodei	64.3258
MA0081.3	Highly_Reduced	Poikilotherm	Laticauda_laticaudata	63.1454
MA0081.3	Highly_Reduced	Poikilotherm	Latimeria_chalumnae	63.0345
MA0081.3	Highly_Reduced	Poikilotherm	Leptobrachium_leishanense	60.7679
MA0081.3	Highly_Reduced	Poikilotherm	Naja_naja	63.195
MA0081.3	Highly_Reduced	Poikilotherm	Notechis_scutatus	62.8986
MA0081.3	Highly_Reduced	Poikilotherm	Pelodiscus_sinensis	64.1877
MA0081.3	Highly_Reduced	Poikilotherm	Pelusios_castaneus	63.9171
MA0081.3	Highly_Reduced	Poikilotherm	Podarcis_muralis	63.0569
MA0081.3	Highly_Reduced	Poikilotherm	Pseudonaja_textilis
MA0081.3	Highly_Reduced	Poikilotherm	Pseudonaja_textlis	62.0824
MA0081.3	Highly_Reduced	Poikilotherm	Salvator_merianae	63.3457
MA0081.3	Highly_Reduced	Poikilotherm	Sphenodon_punctatus	62.3806
MA0081.3	Highly_Reduced	Poikilotherm	Terrapene_carolina_triunguis	64.4669
MA0081.3	Highly_Reduced	Poikilotherm	Varanus_komodoensis	63.1743
MA0081.3	Highly_Reduced	Poikilotherm	Xenopus_tropicalis	61.3137
MA0104.5	Moderately_Enriched	Homeotherm	Amazona_collaria		73.2598
MA0104.5	Moderately_Enriched	Homeotherm	Anas_platyrhynchos		74.4561
MA0104.5	Moderately_Enriched	Homeotherm	Aotus_nancymaae		73.7327
MA0104.5	Moderately_Enriched	Homeotherm	Apteryx_haastii		76.7834
MA0104.5	Moderately_Enriched	Homeotherm	Aquila_chrysaetos		74.743
MA0104.5	Moderately_Enriched	Homeotherm	Athene_cunicularia		74.2283
MA0104.5	Moderately_Enriched	Homeotherm	Balaenoptera_musculus		74.035
MA0104.5	Moderately_Enriched	Homeotherm	Bison_bison		73.6035
MA0104.5	Moderately_Enriched	Homeotherm	Bos_taurus		73.733
MA0104.5	Moderately_Enriched	Homeotherm	Cairina_moschata		75.0729
MA0104.5	Moderately_Enriched	Homeotherm	Calidris_pugnax		71.6774
MA0104.5	Moderately_Enriched	Homeotherm	Callithrix_jacchus		73.5645
MA0104.5	Moderately_Enriched	Homeotherm	Camelus_dromedarius		73.8657
MA0104.5	Moderately_Enriched	Homeotherm	Canis_lupus		76.109
MA0104.5	Moderately_Enriched	Homeotherm	Carlito_syrichta		73.8376
MA0104.5	Moderately_Enriched	Homeotherm	Castor_canadensis		74.0396
MA0104.5	Moderately_Enriched	Homeotherm	Catharus_ustulatus		75.2894
MA0104.5	Moderately_Enriched	Homeotherm	Cebus_imitator		73.6402
MA0104.5	Moderately_Enriched	Homeotherm	Cercocebus_atys		74.0152
MA0104.5	Moderately_Enriched	Homeotherm	Cervus_hanglu		73.8432
MA0104.5	Moderately_Enriched	Homeotherm	Choloepus_hoffmanni		71.1251
MA0104.5	Moderately_Enriched	Homeotherm	Corvus_moneduloides		74.9256
MA0104.5	Moderately_Enriched	Homeotherm	Coturnix_japonica		73.5501
MA0104.5	Moderately_Enriched	Homeotherm	Delphinapterus_leucas		73.8466
MA0104.5	Moderately_Enriched	Homeotherm	Echinops_telfairi		72.8403
MA0104.5	Moderately_Enriched	Homeotherm	Equus_asinus		74.083
MA0104.5	Moderately_Enriched	Homeotherm	Equus_caballus		74.085
MA0104.5	Moderately_Enriched	Homeotherm	Erinaceus_europaeus		72.8668
MA0104.5	Moderately_Enriched	Homeotherm	Felis_catus		74.4049
MA0104.5	Moderately_Enriched	Homeotherm	Ficedula_albicollis		72.8125
MA0104.5	Moderately_Enriched	Homeotherm	Gallus_gallus		72.7461
MA0104.5	Moderately_Enriched	Homeotherm	Geospiza_fortis		71.7267
MA0104.5	Moderately_Enriched	Homeotherm	Gorilla_gorilla		73.6577
MA0104.5	Moderately_Enriched	Homeotherm	Homo_sapiens		73.9563
MA0104.5	Moderately_Enriched	Homeotherm	Jaculus_jaculus		73.2649
MA0104.5	Moderately_Enriched	Homeotherm	Loxodonta_africana		74.5157
MA0104.5	Moderately_Enriched	Homeotherm	Lynx_canadensis		74.4285
MA0104.5	Moderately_Enriched	Homeotherm	Macaca_mulatta		73.8484
MA0104.5	Moderately_Enriched	Homeotherm	Manacus_vitellinus		72.3231
MA0104.5	Moderately_Enriched	Homeotherm	Meleagris_gallopavo		70.1153
MA0104.5	Moderately_Enriched	Homeotherm	Meriones_unguiculatus		73.2677
MA0104.5	Moderately_Enriched	Homeotherm	Microcebus_murinus		74.6327
MA0104.5	Moderately_Enriched	Homeotherm	Monodelphis_domestica		73.6558
MA0104.5	Moderately_Enriched	Homeotherm	Mus_musculus		72.8008
MA0104.5	Moderately_Enriched	Homeotherm	Mus_pahari		72.513
MA0104.5	Moderately_Enriched	Homeotherm	Nannospalax_galili		73.0496
MA0104.5	Moderately_Enriched	Homeotherm	Neovison_vison		74.2281
MA0104.5	Moderately_Enriched	Homeotherm	Notamacropus_eugenii		73.5503
MA0104.5	Moderately_Enriched	Homeotherm	Nothoprocta_perdicaria		76.0898
MA0104.5	Moderately_Enriched	Homeotherm	Numida_meleagris		74.1358
MA0104.5	Moderately_Enriched	Homeotherm	Ornithorhynchus_anatinus		75.4723
MA0104.5	Moderately_Enriched	Homeotherm	Oryctolagus_cuniculus		74.6062
MA0104.5	Moderately_Enriched	Homeotherm	Otolemur_garnettii		72.8554
MA0104.5	Moderately_Enriched	Homeotherm	Pan_troglodytes		74.1588
MA0104.5	Moderately_Enriched	Homeotherm	Panthera_leo		74.4945
MA0104.5	Moderately_Enriched	Homeotherm	Papio_anubis		73.7612
MA0104.5	Moderately_Enriched	Homeotherm	Parus_major		73.3581
MA0104.5	Moderately_Enriched	Homeotherm	Pavo_cristatus		74.0844
MA0104.5	Moderately_Enriched	Homeotherm	Phascolarctos_cinereus		71.4295
MA0104.5	Moderately_Enriched	Homeotherm	Phasianus_colchicus		71.4477
MA0104.5	Moderately_Enriched	Homeotherm	Physeter_catodon		74.3415
MA0104.5	Moderately_Enriched	Homeotherm	Piliocolobus_tephrosceles		72.6987
MA0104.5	Moderately_Enriched	Homeotherm	Pongo_abelii		73.9199
MA0104.5	Moderately_Enriched	Homeotherm	Prolemur_simus		74.1462
MA0104.5	Moderately_Enriched	Homeotherm	Pteropus_vampyrus		74.5509
MA0104.5	Moderately_Enriched	Homeotherm	Rattus_norvegicus		72.2418
MA0104.5	Moderately_Enriched	Homeotherm	Rhinolophus_ferrumequinum		73.4577
MA0104.5	Moderately_Enriched	Homeotherm	Rhinopithecus_roxellana		74.0256
MA0104.5	Moderately_Enriched	Homeotherm	Sarcophilus_harrisii		74.0548
MA0104.5	Moderately_Enriched	Homeotherm	Sciurus_vulgaris		74.0724
MA0104.5	Moderately_Enriched	Homeotherm	Serinus_canaria		72.3062
MA0104.5	Moderately_Enriched	Homeotherm	Sorex_araneus		73.8391
MA0104.5	Moderately_Enriched	Homeotherm	Stachyris_ruficeps		73.6937
MA0104.5	Moderately_Enriched	Homeotherm	Strigops_habroptila		73.0596
MA0104.5	Moderately_Enriched	Homeotherm	Strix_occidentalis		81.9799
MA0104.5	Moderately_Enriched	Homeotherm	Struthio_camelus		75.3822
MA0104.5	Moderately_Enriched	Homeotherm	Sus_scrofa		74.2502
MA0104.5	Moderately_Enriched	Homeotherm	Taeniopygia_guttata		74.2102
MA0104.5	Moderately_Enriched	Homeotherm	Tupaia_belangeri		74.3504
MA0104.5	Moderately_Enriched	Homeotherm	Urocitellus_parryii		73.798
MA0104.5	Moderately_Enriched	Homeotherm	Ursus_maritimus		73.6341
MA0104.5	Moderately_Enriched	Homeotherm	Vulpes_vulpes		75.6743
MA0104.5	Moderately_Enriched	Homeotherm	Zalophus_californianus		74.1818
MA0104.5	Moderately_Enriched	Homeotherm	Zonotrichia_albicollis		72.8939
MA0104.5	Moderately_Enriched	Poikilotherm	Anolis_carolinensis		75.2232
MA0104.5	Moderately_Enriched	Poikilotherm	Chelonoidis_abingdonii		73.2652
MA0104.5	Moderately_Enriched	Poikilotherm	Chelydra_serpentina		80.2194
MA0104.5	Moderately_Enriched	Poikilotherm	Chrysemys_picta		74.0818
MA0104.5	Moderately_Enriched	Poikilotherm	Crocodylus_porosus		73.5648
MA0104.5	Moderately_Enriched	Poikilotherm	Erpetoichthys_calabaricus		69.5163
MA0104.5	Moderately_Enriched	Poikilotherm	Gopherus_evgoodei		72.4297
MA0104.5	Moderately_Enriched	Poikilotherm	Laticauda_laticaudata		75.0118
MA0104.5	Moderately_Enriched	Poikilotherm	Latimeria_chalumnae		70.7596
MA0104.5	Moderately_Enriched	Poikilotherm	Leptobrachium_leishanense		69.8274
MA0104.5	Moderately_Enriched	Poikilotherm	Naja_naja		74.7642
MA0104.5	Moderately_Enriched	Poikilotherm	Notechis_scutatus		74.2941
MA0104.5	Moderately_Enriched	Poikilotherm	Pelodiscus_sinensis		73.5617
MA0104.5	Moderately_Enriched	Poikilotherm	Pelusios_castaneus		73.684
MA0104.5	Moderately_Enriched	Poikilotherm	Podarcis_muralis		73.2047
MA0104.5	Moderately_Enriched	Poikilotherm	Pseudonaja_textilis		74.9904
MA0104.5	Moderately_Enriched	Poikilotherm	Salvator_merianae		72.6991
MA0104.5	Moderately_Enriched	Poikilotherm	Sphenodon_punctatus		74.0001
MA0104.5	Moderately_Enriched	Poikilotherm	Terrapene_carolina		74.663
MA0104.5	Moderately_Enriched	Poikilotherm	Varanus_komodoensis		76.1234
MA0104.5	Moderately_Enriched	Poikilotherm	Xenopus_tropicalis		72.7804
MA0111.1	Highly_Reduced	Homeotherm	Amazona_collaria	69.3307
MA0111.1	Highly_Reduced	Homeotherm	Anas_platyrhynchos	68.7629
MA0111.1	Highly_Reduced	Homeotherm	Anas_platyrhynchos_platyrhynchos
MA0111.1	Highly_Reduced	Homeotherm	Aotus_nancymaae	67.2542
MA0111.1	Highly_Reduced	Homeotherm	Apteryx_haastii	69.6302
MA0111.1	Highly_Reduced	Homeotherm	Aquila_chrysaetos	70.603
MA0111.1	Highly_Reduced	Homeotherm	Aquila_chrysaetos_chrysaetos
MA0111.1	Highly_Reduced	Homeotherm	Athene_cunicularia	67.7502
MA0111.1	Highly_Reduced	Homeotherm	Balaenoptera_musculus	67.0637
MA0111.1	Highly_Reduced	Homeotherm	Bison_bison_bison	66.435
MA0111.1	Highly_Reduced	Homeotherm	Bos_taurus	66.6608
MA0111.1	Highly_Reduced	Homeotherm	Cairina_moschata_domestica	69.697
MA0111.1	Highly_Reduced	Homeotherm	Calidris_pugnax	69.334
MA0111.1	Highly_Reduced	Homeotherm	Callithrix_jacchus	67.2278
MA0111.1	Highly_Reduced	Homeotherm	Camelus_dromedarius	66.8084
MA0111.1	Highly_Reduced	Homeotherm	Canis_lupus_familiaris	68.6685
MA0111.1	Highly_Reduced	Homeotherm	Carlito_syrichta	67.0083
MA0111.1	Highly_Reduced	Homeotherm	Castor_canadensis	66.6945
MA0111.1	Highly_Reduced	Homeotherm	Catharus_ustulatus	68.2589
MA0111.1	Highly_Reduced	Homeotherm	Cebus_imitator	66.4249
MA0111.1	Highly_Reduced	Homeotherm	Cercocebus_atys	67.0711
MA0111.1	Highly_Reduced	Homeotherm	Cervus_hanglu_yarkandensis	66.9917
MA0111.1	Highly_Reduced	Homeotherm	Choloepus_hoffmanni	65.8706
MA0111.1	Highly_Reduced	Homeotherm	Corvus_moneduloides	68.325
MA0111.1	Highly_Reduced	Homeotherm	Coturnix_japonica	68.6755
MA0111.1	Highly_Reduced	Homeotherm	Delphinapterus_leucas	67.5164
MA0111.1	Highly_Reduced	Homeotherm	Echinops_telfairi	65.4298
MA0111.1	Highly_Reduced	Homeotherm	Equus_asinus	67.7035
MA0111.1	Highly_Reduced	Homeotherm	Equus_caballus	66.3636
MA0111.1	Highly_Reduced	Homeotherm	Erinaceus_europaeus	65.4545
MA0111.1	Highly_Reduced	Homeotherm	Felis_catus	67.4242
MA0111.1	Highly_Reduced	Homeotherm	Ficedula_albicollis	67.5866
MA0111.1	Highly_Reduced	Homeotherm	Gallus_gallus	69.9337
MA0111.1	Highly_Reduced	Homeotherm	Geospiza_fortis	66.3127
MA0111.1	Highly_Reduced	Homeotherm	Gorilla_gorilla	67.161
MA0111.1	Highly_Reduced	Homeotherm	Homo_sapiens	67.1333
MA0111.1	Highly_Reduced	Homeotherm	Jaculus_jaculus	66.0478
MA0111.1	Highly_Reduced	Homeotherm	Loxodonta_africana	66.1593
MA0111.1	Highly_Reduced	Homeotherm	Lynx_canadensis	67.0982
MA0111.1	Highly_Reduced	Homeotherm	Macaca_mulatta	67.2051
MA0111.1	Highly_Reduced	Homeotherm	Manacus_vitellinus	67.492
MA0111.1	Highly_Reduced	Homeotherm	Meleagris_gallopavo	67.9595
MA0111.1	Highly_Reduced	Homeotherm	Meriones_unguiculatus	67.4702
MA0111.1	Highly_Reduced	Homeotherm	Microcebus_murinus	67.049
MA0111.1	Highly_Reduced	Homeotherm	Monodelphis_domestica	65.4258
MA0111.1	Highly_Reduced	Homeotherm	Mus_musculus	66.0231
MA0111.1	Highly_Reduced	Homeotherm	Mus_pahari	65.8859
MA0111.1	Highly_Reduced	Homeotherm	Nannospalax_galili	66.455
MA0111.1	Highly_Reduced	Homeotherm	Neovison_vison	67.3077
MA0111.1	Highly_Reduced	Homeotherm	Notamacropus_eugenii	66.5629
MA0111.1	Highly_Reduced	Homeotherm	Nothoprocta_perdicaria	69.1105
MA0111.1	Highly_Reduced	Homeotherm	Numida_meleagris	69.5535
MA0111.1	Highly_Reduced	Homeotherm	Ornithorhynchus_anatinus	67.6901
MA0111.1	Highly_Reduced	Homeotherm	Oryctolagus_cuniculus	67.7416
MA0111.1	Highly_Reduced	Homeotherm	Otolemur_garnettii	66.6611
MA0111.1	Highly_Reduced	Homeotherm	Pan_troglodytes	66.9127
MA0111.1	Highly_Reduced	Homeotherm	Panthera_leo	67.3166
MA0111.1	Highly_Reduced	Homeotherm	Papio_anubis	66.54
MA0111.1	Highly_Reduced	Homeotherm	Parus_major	68.4069
MA0111.1	Highly_Reduced	Homeotherm	Pavo_cristatus	69.3592
MA0111.1	Highly_Reduced	Homeotherm	Phascolarctos_cinereus	65.3905
MA0111.1	Highly_Reduced	Homeotherm	Phasianus_colchicus	69.6496
MA0111.1	Highly_Reduced	Homeotherm	Physeter_catodon	66.8995
MA0111.1	Highly_Reduced	Homeotherm	Piliocolobus_tephrosceles	65.9465
MA0111.1	Highly_Reduced	Homeotherm	Pongo_abelii	67.0684
MA0111.1	Highly_Reduced	Homeotherm	Prolemur_simus	66.3436
MA0111.1	Highly_Reduced	Homeotherm	Pteropus_vampyrus	66.8706
MA0111.1	Highly_Reduced	Homeotherm	Rattus_norvegicus	66.0976
MA0111.1	Highly_Reduced	Homeotherm	Rhinolophus_ferrumequinum	66.3323
MA0111.1	Highly_Reduced	Homeotherm	Rhinopithecus_roxellana	66.6403
MA0111.1	Highly_Reduced	Homeotherm	Sarcophilus_harrisii	65.4886
MA0111.1	Highly_Reduced	Homeotherm	Sciurus_vulgaris	66.5105
MA0111.1	Highly_Reduced	Homeotherm	Serinus_canaria	66.9407
MA0111.1	Highly_Reduced	Homeotherm	Sorex_araneus	66.521
MA0111.1	Highly_Reduced	Homeotherm	Stachyris_ruficeps	68.3903
MA0111.1	Highly_Reduced	Homeotherm	Strigops_habroptila	69.6166
MA0111.1	Highly_Reduced	Homeotherm	Strix_occidentalis_caurina	69.1229
MA0111.1	Highly_Reduced	Homeotherm	Struthio_camelus_australis	66.989
MA0111.1	Highly_Reduced	Homeotherm	Sus_scrofa	67.3671
MA0111.1	Highly_Reduced	Homeotherm	Taeniopygia_guttata	68.7964
MA0111.1	Highly_Reduced	Homeotherm	Tupaia_belangeri	66.8499
MA0111.1	Highly_Reduced	Homeotherm	Urocitellus_parryii	65.9824
MA0111.1	Highly_Reduced	Homeotherm	Ursus_maritimus	66.2733
MA0111.1	Highly_Reduced	Homeotherm	Vulpes_vulpes	67.5404
MA0111.1	Highly_Reduced	Homeotherm	Zalophus_californianus	66.5173
MA0111.1	Highly_Reduced	Homeotherm	Zonotrichia_albicollis	67.7718
MA0111.1	Highly_Reduced	Poikilotherm	Anolis_carolinensis	66.055
MA0111.1	Highly_Reduced	Poikilotherm	Chelonoidis_abingdonii	67.3429
MA0111.1	Highly_Reduced	Poikilotherm	Chelydra_serpentina	67.9153
MA0111.1	Highly_Reduced	Poikilotherm	Chrysemys_picta_bellii	67.8182
MA0111.1	Highly_Reduced	Poikilotherm	Crocodylus_porosus	67.7478
MA0111.1	Highly_Reduced	Poikilotherm	Erpetoichthys_calabaricus	63.5241
MA0111.1	Highly_Reduced	Poikilotherm	Gopherus_evgoodei	67.9325
MA0111.1	Highly_Reduced	Poikilotherm	Laticauda_laticaudata	66.1858
MA0111.1	Highly_Reduced	Poikilotherm	Latimeria_chalumnae	64.3877
MA0111.1	Highly_Reduced	Poikilotherm	Leptobrachium_leishanense	65.4513
MA0111.1	Highly_Reduced	Poikilotherm	Naja_naja	65.7561
MA0111.1	Highly_Reduced	Poikilotherm	Notechis_scutatus	67.0175
MA0111.1	Highly_Reduced	Poikilotherm	Pelodiscus_sinensis	67.4084
MA0111.1	Highly_Reduced	Poikilotherm	Pelusios_castaneus	66.8232
MA0111.1	Highly_Reduced	Poikilotherm	Podarcis_muralis	66.8863
MA0111.1	Highly_Reduced	Poikilotherm	Pseudonaja_textilis
MA0111.1	Highly_Reduced	Poikilotherm	Pseudonaja_textlis	67.3108
MA0111.1	Highly_Reduced	Poikilotherm	Salvator_merianae	67.7686
MA0111.1	Highly_Reduced	Poikilotherm	Sphenodon_punctatus	64.5439
MA0111.1	Highly_Reduced	Poikilotherm	Terrapene_carolina_triunguis	67.4542
MA0111.1	Highly_Reduced	Poikilotherm	Varanus_komodoensis	68.897
MA0111.1	Highly_Reduced	Poikilotherm	Xenopus_tropicalis	64.3275
MA0113.4	Moderately_Reduced	Homeotherm	Amazona_collaria		63.4178
MA0113.4	Moderately_Reduced	Homeotherm	Anas_platyrhynchos		65.4491
MA0113.4	Moderately_Reduced	Homeotherm	Aotus_nancymaae		61.3405
MA0113.4	Moderately_Reduced	Homeotherm	Apteryx_haastii		65.5191
MA0113.4	Moderately_Reduced	Homeotherm	Aquila_chrysaetos		65.6869
MA0113.4	Moderately_Reduced	Homeotherm	Athene_cunicularia		62.237
MA0113.4	Moderately_Reduced	Homeotherm	Balaenoptera_musculus		61.7805
MA0113.4	Moderately_Reduced	Homeotherm	Bison_bison		62.0506
MA0113.4	Moderately_Reduced	Homeotherm	Bos_taurus		62.033
MA0113.4	Moderately_Reduced	Homeotherm	Cairina_moschata		65.814
MA0113.4	Moderately_Reduced	Homeotherm	Calidris_pugnax		65.908
MA0113.4	Moderately_Reduced	Homeotherm	Callithrix_jacchus		61.5638
MA0113.4	Moderately_Reduced	Homeotherm	Camelus_dromedarius		61.4983
MA0113.4	Moderately_Reduced	Homeotherm	Canis_lupus		62.5292
MA0113.4	Moderately_Reduced	Homeotherm	Carlito_syrichta		60.4888
MA0113.4	Moderately_Reduced	Homeotherm	Castor_canadensis		59.4434
MA0113.4	Moderately_Reduced	Homeotherm	Catharus_ustulatus		64.8657
MA0113.4	Moderately_Reduced	Homeotherm	Cebus_imitator		61.7196
MA0113.4	Moderately_Reduced	Homeotherm	Cercocebus_atys		60.7625
MA0113.4	Moderately_Reduced	Homeotherm	Cervus_hanglu		62.6616
MA0113.4	Moderately_Reduced	Homeotherm	Choloepus_hoffmanni		59.1846
MA0113.4	Moderately_Reduced	Homeotherm	Corvus_moneduloides		65.5129
MA0113.4	Moderately_Reduced	Homeotherm	Coturnix_japonica		62.5601
MA0113.4	Moderately_Reduced	Homeotherm	Delphinapterus_leucas		62.0448
MA0113.4	Moderately_Reduced	Homeotherm	Echinops_telfairi		60.3141
MA0113.4	Moderately_Reduced	Homeotherm	Equus_asinus		61.7873
MA0113.4	Moderately_Reduced	Homeotherm	Equus_caballus		61.9806
MA0113.4	Moderately_Reduced	Homeotherm	Erinaceus_europaeus		58.5958
MA0113.4	Moderately_Reduced	Homeotherm	Felis_catus		62.1924
MA0113.4	Moderately_Reduced	Homeotherm	Ficedula_albicollis		64.7471
MA0113.4	Moderately_Reduced	Homeotherm	Gallus_gallus		63.538
MA0113.4	Moderately_Reduced	Homeotherm	Geospiza_fortis		64.8016
MA0113.4	Moderately_Reduced	Homeotherm	Gorilla_gorilla		60.6757
MA0113.4	Moderately_Reduced	Homeotherm	Homo_sapiens		60.8481
MA0113.4	Moderately_Reduced	Homeotherm	Jaculus_jaculus		60.1663
MA0113.4	Moderately_Reduced	Homeotherm	Loxodonta_africana		60.3008
MA0113.4	Moderately_Reduced	Homeotherm	Lynx_canadensis		62.0454
MA0113.4	Moderately_Reduced	Homeotherm	Macaca_mulatta		61.1291
MA0113.4	Moderately_Reduced	Homeotherm	Manacus_vitellinus		62.807
MA0113.4	Moderately_Reduced	Homeotherm	Meleagris_gallopavo		59.1213
MA0113.4	Moderately_Reduced	Homeotherm	Meriones_unguiculatus		60.0431
MA0113.4	Moderately_Reduced	Homeotherm	Microcebus_murinus		63.0517
MA0113.4	Moderately_Reduced	Homeotherm	Monodelphis_domestica		58.3881
MA0113.4	Moderately_Reduced	Homeotherm	Mus_musculus		57.3614
MA0113.4	Moderately_Reduced	Homeotherm	Mus_pahari		57.9658
MA0113.4	Moderately_Reduced	Homeotherm	Nannospalax_galili		58.8309
MA0113.4	Moderately_Reduced	Homeotherm	Neovison_vison		61.5262
MA0113.4	Moderately_Reduced	Homeotherm	Notamacropus_eugenii		56.0099
MA0113.4	Moderately_Reduced	Homeotherm	Nothoprocta_perdicaria		66.5391
MA0113.4	Moderately_Reduced	Homeotherm	Numida_meleagris		63.8338
MA0113.4	Moderately_Reduced	Homeotherm	Ornithorhynchus_anatinus		60.9089
MA0113.4	Moderately_Reduced	Homeotherm	Oryctolagus_cuniculus		63.2414
MA0113.4	Moderately_Reduced	Homeotherm	Otolemur_garnettii		59.652
MA0113.4	Moderately_Reduced	Homeotherm	Pan_troglodytes		61.2734
MA0113.4	Moderately_Reduced	Homeotherm	Panthera_leo		62.2025
MA0113.4	Moderately_Reduced	Homeotherm	Papio_anubis		60.743
MA0113.4	Moderately_Reduced	Homeotherm	Parus_major		65.1548
MA0113.4	Moderately_Reduced	Homeotherm	Pavo_cristatus		65.2393
MA0113.4	Moderately_Reduced	Homeotherm	Phascolarctos_cinereus		56.4442
MA0113.4	Moderately_Reduced	Homeotherm	Phasianus_colchicus		62.9728
MA0113.4	Moderately_Reduced	Homeotherm	Physeter_catodon		61.8347
MA0113.4	Moderately_Reduced	Homeotherm	Piliocolobus_tephrosceles		60.8257
MA0113.4	Moderately_Reduced	Homeotherm	Pongo_abelii		60.9144
MA0113.4	Moderately_Reduced	Homeotherm	Prolemur_simus		62.234
MA0113.4	Moderately_Reduced	Homeotherm	Pteropus_vampyrus		62.644
MA0113.4	Moderately_Reduced	Homeotherm	Rattus_norvegicus		57.958
MA0113.4	Moderately_Reduced	Homeotherm	Rhinolophus_ferrumequinum		57.6832
MA0113.4	Moderately_Reduced	Homeotherm	Rhinopithecus_roxellana		60.4354
MA0113.4	Moderately_Reduced	Homeotherm	Sarcophilus_harrisii		58.471
MA0113.4	Moderately_Reduced	Homeotherm	Sciurus_vulgaris		61.53
MA0113.4	Moderately_Reduced	Homeotherm	Serinus_canaria		64.4041
MA0113.4	Moderately_Reduced	Homeotherm	Sorex_araneus		61.0178
MA0113.4	Moderately_Reduced	Homeotherm	Stachyris_ruficeps		65.8745
MA0113.4	Moderately_Reduced	Homeotherm	Strigops_habroptila		58.7797
MA0113.4	Moderately_Reduced	Homeotherm	Strix_occidentalis		65.6995
MA0113.4	Moderately_Reduced	Homeotherm	Struthio_camelus		62.6263
MA0113.4	Moderately_Reduced	Homeotherm	Sus_scrofa		61.2348
MA0113.4	Moderately_Reduced	Homeotherm	Taeniopygia_guttata		66.0298
MA0113.4	Moderately_Reduced	Homeotherm	Tupaia_belangeri		61.6576
MA0113.4	Moderately_Reduced	Homeotherm	Urocitellus_parryii		62.008
MA0113.4	Moderately_Reduced	Homeotherm	Ursus_maritimus		60.936
MA0113.4	Moderately_Reduced	Homeotherm	Vulpes_vulpes		62.927
MA0113.4	Moderately_Reduced	Homeotherm	Zalophus_californianus		61.4025
MA0113.4	Moderately_Reduced	Homeotherm	Zonotrichia_albicollis		63.6397
MA0113.4	Moderately_Reduced	Poikilotherm	Anolis_carolinensis		58.2282
MA0113.4	Moderately_Reduced	Poikilotherm	Chelonoidis_abingdonii		60.1816
MA0113.4	Moderately_Reduced	Poikilotherm	Chelydra_serpentina		60.6678
MA0113.4	Moderately_Reduced	Poikilotherm	Chrysemys_picta		60.7958
MA0113.4	Moderately_Reduced	Poikilotherm	Crocodylus_porosus		60.6995
MA0113.4	Moderately_Reduced	Poikilotherm	Erpetoichthys_calabaricus		58.336
MA0113.4	Moderately_Reduced	Poikilotherm	Gopherus_evgoodei		61.0167
MA0113.4	Moderately_Reduced	Poikilotherm	Laticauda_laticaudata		56.4189
MA0113.4	Moderately_Reduced	Poikilotherm	Latimeria_chalumnae		55.6824
MA0113.4	Moderately_Reduced	Poikilotherm	Leptobrachium_leishanense		56.4987
MA0113.4	Moderately_Reduced	Poikilotherm	Naja_naja		57.0559
MA0113.4	Moderately_Reduced	Poikilotherm	Notechis_scutatus		59.5031
MA0113.4	Moderately_Reduced	Poikilotherm	Pelodiscus_sinensis		60.9206
MA0113.4	Moderately_Reduced	Poikilotherm	Pelusios_castaneus		60.9367
MA0113.4	Moderately_Reduced	Poikilotherm	Podarcis_muralis		58.8235
MA0113.4	Moderately_Reduced	Poikilotherm	Pseudonaja_textilis		57.8314
MA0113.4	Moderately_Reduced	Poikilotherm	Salvator_merianae		58.456
MA0113.4	Moderately_Reduced	Poikilotherm	Sphenodon_punctatus		59.444
MA0113.4	Moderately_Reduced	Poikilotherm	Terrapene_carolina		60.467
MA0113.4	Moderately_Reduced	Poikilotherm	Varanus_komodoensis		60.7437
MA0113.4	Moderately_Reduced	Poikilotherm	Xenopus_tropicalis		56.7521
MA0124.3	Highly_Enriched	Homeotherm	Amazona_collaria		42.8571
MA0124.3	Highly_Enriched	Homeotherm	Anas_platyrhynchos		42.8571
MA0124.3	Highly_Enriched	Homeotherm	Aotus_nancymaae		42.8571
MA0124.3	Highly_Enriched	Homeotherm	Apteryx_haastii		42.8571
MA0124.3	Highly_Enriched	Homeotherm	Aquila_chrysaetos		42.8571
MA0124.3	Highly_Enriched	Homeotherm	Athene_cunicularia		42.8571
MA0124.3	Highly_Enriched	Homeotherm	Balaenoptera_musculus		42.8571
MA0124.3	Highly_Enriched	Homeotherm	Bison_bison		42.8571
MA0124.3	Highly_Enriched	Homeotherm	Bos_taurus		42.8571
MA0124.3	Highly_Enriched	Homeotherm	Cairina_moschata		42.8571
MA0124.3	Highly_Enriched	Homeotherm	Calidris_pugnax		42.8571
MA0124.3	Highly_Enriched	Homeotherm	Callithrix_jacchus		42.8571
MA0124.3	Highly_Enriched	Homeotherm	Camelus_dromedarius		42.8571
MA0124.3	Highly_Enriched	Homeotherm	Canis_lupus		42.8571
MA0124.3	Highly_Enriched	Homeotherm	Carlito_syrichta		42.8571
MA0124.3	Highly_Enriched	Homeotherm	Castor_canadensis		42.8571
MA0124.3	Highly_Enriched	Homeotherm	Catharus_ustulatus		42.8571
MA0124.3	Highly_Enriched	Homeotherm	Cebus_imitator		42.8571
MA0124.3	Highly_Enriched	Homeotherm	Cercocebus_atys		42.8571
MA0124.3	Highly_Enriched	Homeotherm	Cervus_hanglu		42.8571
MA0124.3	Highly_Enriched	Homeotherm	Choloepus_hoffmanni		42.8571
MA0124.3	Highly_Enriched	Homeotherm	Corvus_moneduloides		42.8571
MA0124.3	Highly_Enriched	Homeotherm	Coturnix_japonica		42.8571
MA0124.3	Highly_Enriched	Homeotherm	Delphinapterus_leucas		42.8571
MA0124.3	Highly_Enriched	Homeotherm	Echinops_telfairi		42.8571
MA0124.3	Highly_Enriched	Homeotherm	Equus_asinus		42.8571
MA0124.3	Highly_Enriched	Homeotherm	Equus_caballus		42.8571
MA0124.3	Highly_Enriched	Homeotherm	Erinaceus_europaeus		42.8571
MA0124.3	Highly_Enriched	Homeotherm	Felis_catus		42.8571
MA0124.3	Highly_Enriched	Homeotherm	Ficedula_albicollis		42.8571
MA0124.3	Highly_Enriched	Homeotherm	Gallus_gallus		42.8571
MA0124.3	Highly_Enriched	Homeotherm	Geospiza_fortis		42.8571
MA0124.3	Highly_Enriched	Homeotherm	Gorilla_gorilla		42.8571
MA0124.3	Highly_Enriched	Homeotherm	Homo_sapiens		42.8571
MA0124.3	Highly_Enriched	Homeotherm	Jaculus_jaculus		42.8571
MA0124.3	Highly_Enriched	Homeotherm	Loxodonta_africana		42.8571
MA0124.3	Highly_Enriched	Homeotherm	Lynx_canadensis		42.8571
MA0124.3	Highly_Enriched	Homeotherm	Macaca_mulatta		42.8571
MA0124.3	Highly_Enriched	Homeotherm	Manacus_vitellinus		42.8571
MA0124.3	Highly_Enriched	Homeotherm	Meleagris_gallopavo		42.8571
MA0124.3	Highly_Enriched	Homeotherm	Meriones_unguiculatus		42.8571
MA0124.3	Highly_Enriched	Homeotherm	Microcebus_murinus		42.8571
MA0124.3	Highly_Enriched	Homeotherm	Monodelphis_domestica		42.8571
MA0124.3	Highly_Enriched	Homeotherm	Mus_musculus		42.8571
MA0124.3	Highly_Enriched	Homeotherm	Mus_pahari		42.8571
MA0124.3	Highly_Enriched	Homeotherm	Nannospalax_galili		42.8571
MA0124.3	Highly_Enriched	Homeotherm	Neovison_vison		42.8571
MA0124.3	Highly_Enriched	Homeotherm	Notamacropus_eugenii		42.8571
MA0124.3	Highly_Enriched	Homeotherm	Nothoprocta_perdicaria		42.8571
MA0124.3	Highly_Enriched	Homeotherm	Numida_meleagris		42.8571
MA0124.3	Highly_Enriched	Homeotherm	Ornithorhynchus_anatinus		42.8571
MA0124.3	Highly_Enriched	Homeotherm	Oryctolagus_cuniculus		42.8571
MA0124.3	Highly_Enriched	Homeotherm	Otolemur_garnettii		42.8571
MA0124.3	Highly_Enriched	Homeotherm	Pan_troglodytes		42.8571
MA0124.3	Highly_Enriched	Homeotherm	Panthera_leo		42.8571
MA0124.3	Highly_Enriched	Homeotherm	Papio_anubis		42.8571
MA0124.3	Highly_Enriched	Homeotherm	Parus_major		42.8571
MA0124.3	Highly_Enriched	Homeotherm	Pavo_cristatus		42.8571
MA0124.3	Highly_Enriched	Homeotherm	Phascolarctos_cinereus		42.8571
MA0124.3	Highly_Enriched	Homeotherm	Phasianus_colchicus		42.8571
MA0124.3	Highly_Enriched	Homeotherm	Physeter_catodon		42.8571
MA0124.3	Highly_Enriched	Homeotherm	Piliocolobus_tephrosceles		42.8571
MA0124.3	Highly_Enriched	Homeotherm	Pongo_abelii		42.8571
MA0124.3	Highly_Enriched	Homeotherm	Prolemur_simus		42.8571
MA0124.3	Highly_Enriched	Homeotherm	Pteropus_vampyrus		42.8571
MA0124.3	Highly_Enriched	Homeotherm	Rattus_norvegicus		42.8571
MA0124.3	Highly_Enriched	Homeotherm	Rhinolophus_ferrumequinum		42.8571
MA0124.3	Highly_Enriched	Homeotherm	Rhinopithecus_roxellana		42.8571
MA0124.3	Highly_Enriched	Homeotherm	Sarcophilus_harrisii		42.8571
MA0124.3	Highly_Enriched	Homeotherm	Sciurus_vulgaris		42.8571
MA0124.3	Highly_Enriched	Homeotherm	Serinus_canaria		42.8571
MA0124.3	Highly_Enriched	Homeotherm	Sorex_araneus		42.8571
MA0124.3	Highly_Enriched	Homeotherm	Stachyris_ruficeps		42.8571
MA0124.3	Highly_Enriched	Homeotherm	Strigops_habroptila		42.8571
MA0124.3	Highly_Enriched	Homeotherm	Strix_occidentalis		42.8571
MA0124.3	Highly_Enriched	Homeotherm	Struthio_camelus		42.8571
MA0124.3	Highly_Enriched	Homeotherm	Sus_scrofa		42.8571
MA0124.3	Highly_Enriched	Homeotherm	Taeniopygia_guttata		42.8571
MA0124.3	Highly_Enriched	Homeotherm	Tupaia_belangeri		42.8571
MA0124.3	Highly_Enriched	Homeotherm	Urocitellus_parryii		42.8571
MA0124.3	Highly_Enriched	Homeotherm	Ursus_maritimus		42.8571
MA0124.3	Highly_Enriched	Homeotherm	Vulpes_vulpes		42.8571
MA0124.3	Highly_Enriched	Homeotherm	Zalophus_californianus		42.8571
MA0124.3	Highly_Enriched	Homeotherm	Zonotrichia_albicollis		42.8571
MA0124.3	Highly_Enriched	Poikilotherm	Anolis_carolinensis		42.8571
MA0124.3	Highly_Enriched	Poikilotherm	Chelonoidis_abingdonii		42.8571
MA0124.3	Highly_Enriched	Poikilotherm	Chelydra_serpentina		42.8571
MA0124.3	Highly_Enriched	Poikilotherm	Chrysemys_picta		42.8571
MA0124.3	Highly_Enriched	Poikilotherm	Crocodylus_porosus		42.8571
MA0124.3	Highly_Enriched	Poikilotherm	Erpetoichthys_calabaricus		42.8571
MA0124.3	Highly_Enriched	Poikilotherm	Gopherus_evgoodei		42.8571
MA0124.3	Highly_Enriched	Poikilotherm	Laticauda_laticaudata		42.8571
MA0124.3	Highly_Enriched	Poikilotherm	Latimeria_chalumnae		42.8571
MA0124.3	Highly_Enriched	Poikilotherm	Leptobrachium_leishanense		42.8571
MA0124.3	Highly_Enriched	Poikilotherm	Naja_naja		42.8571
MA0124.3	Highly_Enriched	Poikilotherm	Notechis_scutatus		42.8571
MA0124.3	Highly_Enriched	Poikilotherm	Pelodiscus_sinensis		42.8571
MA0124.3	Highly_Enriched	Poikilotherm	Pelusios_castaneus		42.8571
MA0124.3	Highly_Enriched	Poikilotherm	Podarcis_muralis		42.8571
MA0124.3	Highly_Enriched	Poikilotherm	Pseudonaja_textilis		42.8571
MA0124.3	Highly_Enriched	Poikilotherm	Salvator_merianae		42.8571
MA0124.3	Highly_Enriched	Poikilotherm	Sphenodon_punctatus		42.8571
MA0124.3	Highly_Enriched	Poikilotherm	Terrapene_carolina		42.8571
MA0124.3	Highly_Enriched	Poikilotherm	Varanus_komodoensis		42.8571
MA0124.3	Highly_Enriched	Poikilotherm	Xenopus_tropicalis		42.8571
MA0131.3	Moderately_Enriched	Homeotherm	Amazona_collaria	85.1952	83.9128
MA0131.3	Moderately_Enriched	Homeotherm	Anas_platyrhynchos	83.727	82.0291
MA0131.3	Moderately_Enriched	Homeotherm	Anas_platyrhynchos_platyrhynchos
MA0131.3	Moderately_Enriched	Homeotherm	Aotus_nancymaae	85.0453	83.3408
MA0131.3	Moderately_Enriched	Homeotherm	Apteryx_haastii	84.3672	83.5981
MA0131.3	Moderately_Enriched	Homeotherm	Aquila_chrysaetos	84.6805	82.9153
MA0131.3	Moderately_Enriched	Homeotherm	Aquila_chrysaetos_chrysaetos
MA0131.3	Moderately_Enriched	Homeotherm	Athene_cunicularia	83.5092	82.3529
MA0131.3	Moderately_Enriched	Homeotherm	Balaenoptera_musculus	85.1795	83.2505
MA0131.3	Moderately_Enriched	Homeotherm	Bison_bison		83.1438
MA0131.3	Moderately_Enriched	Homeotherm	Bison_bison_bison	84.5166
MA0131.3	Moderately_Enriched	Homeotherm	Bos_taurus	85.1323	83.3783
MA0131.3	Moderately_Enriched	Homeotherm	Cairina_moschata		82.2375
MA0131.3	Moderately_Enriched	Homeotherm	Cairina_moschata_domestica	83.4338
MA0131.3	Moderately_Enriched	Homeotherm	Calidris_pugnax	83.5802	81.5232
MA0131.3	Moderately_Enriched	Homeotherm	Callithrix_jacchus	85.0191	83.4424
MA0131.3	Moderately_Enriched	Homeotherm	Camelus_dromedarius	84.8271	83.0167
MA0131.3	Moderately_Enriched	Homeotherm	Canis_lupus		84.0432
MA0131.3	Moderately_Enriched	Homeotherm	Canis_lupus_familiaris	85.3631
MA0131.3	Moderately_Enriched	Homeotherm	Carlito_syrichta	84.2391	83.0218
MA0131.3	Moderately_Enriched	Homeotherm	Castor_canadensis	84.8888	83.3968
MA0131.3	Moderately_Enriched	Homeotherm	Catharus_ustulatus	84.9326	84.9862
MA0131.3	Moderately_Enriched	Homeotherm	Cebus_imitator	85.1011	83.517
MA0131.3	Moderately_Enriched	Homeotherm	Cercocebus_atys	84.9814	83.3696
MA0131.3	Moderately_Enriched	Homeotherm	Cervus_hanglu		83.3628
MA0131.3	Moderately_Enriched	Homeotherm	Cervus_hanglu_yarkandensis	84.7848
MA0131.3	Moderately_Enriched	Homeotherm	Choloepus_hoffmanni	84.3978	82.6149
MA0131.3	Moderately_Enriched	Homeotherm	Corvus_moneduloides	84.9829	83.5254
MA0131.3	Moderately_Enriched	Homeotherm	Coturnix_japonica	84.2684	82.9777
MA0131.3	Moderately_Enriched	Homeotherm	Delphinapterus_leucas	85.0643	83.4165
MA0131.3	Moderately_Enriched	Homeotherm	Echinops_telfairi	84.478	82.1844
MA0131.3	Moderately_Enriched	Homeotherm	Equus_asinus	84.9324	82.9864
MA0131.3	Moderately_Enriched	Homeotherm	Equus_caballus	83.5874	83.0896
MA0131.3	Moderately_Enriched	Homeotherm	Erinaceus_europaeus	84.9162	82.9414
MA0131.3	Moderately_Enriched	Homeotherm	Felis_catus	84.5881	83.2614
MA0131.3	Moderately_Enriched	Homeotherm	Ficedula_albicollis	84.7199	83.1395
MA0131.3	Moderately_Enriched	Homeotherm	Gallus_gallus	84.2599	82.0156
MA0131.3	Moderately_Enriched	Homeotherm	Geospiza_fortis	83.6794	82.1744
MA0131.3	Moderately_Enriched	Homeotherm	Gorilla_gorilla	84.7007	83.1623
MA0131.3	Moderately_Enriched	Homeotherm	Homo_sapiens	84.9742	83.423
MA0131.3	Moderately_Enriched	Homeotherm	Jaculus_jaculus	84.842	82.8525
MA0131.3	Moderately_Enriched	Homeotherm	Loxodonta_africana	84.3861	83.3502
MA0131.3	Moderately_Enriched	Homeotherm	Lynx_canadensis	85.0919	83.2447
MA0131.3	Moderately_Enriched	Homeotherm	Macaca_mulatta	84.9774	83.3752
MA0131.3	Moderately_Enriched	Homeotherm	Manacus_vitellinus	84.7665	82.5622
MA0131.3	Moderately_Enriched	Homeotherm	Meleagris_gallopavo	82.1691	80.2213
MA0131.3	Moderately_Enriched	Homeotherm	Meriones_unguiculatus	85.5189	83.7722
MA0131.3	Moderately_Enriched	Homeotherm	Microcebus_murinus	85.3769	83.5215
MA0131.3	Moderately_Enriched	Homeotherm	Monodelphis_domestica	83.8942	82.8198
MA0131.3	Moderately_Enriched	Homeotherm	Mus_musculus	85.0745	83.3246
MA0131.3	Moderately_Enriched	Homeotherm	Mus_pahari	83.9096	83.0798
MA0131.3	Moderately_Enriched	Homeotherm	Nannospalax_galili	84.7483	82.7935
MA0131.3	Moderately_Enriched	Homeotherm	Neovison_vison	84.8043	83.335
MA0131.3	Moderately_Enriched	Homeotherm	Notamacropus_eugenii	83.7545	82.9068
MA0131.3	Moderately_Enriched	Homeotherm	Nothoprocta_perdicaria	84.1821	83.1208
MA0131.3	Moderately_Enriched	Homeotherm	Numida_meleagris	83.6111	82.0833
MA0131.3	Moderately_Enriched	Homeotherm	Ornithorhynchus_anatinus	84.4424	84.2016
MA0131.3	Moderately_Enriched	Homeotherm	Oryctolagus_cuniculus	84.6893	83.4427
MA0131.3	Moderately_Enriched	Homeotherm	Otolemur_garnettii	84.964	82.8208
MA0131.3	Moderately_Enriched	Homeotherm	Pan_troglodytes	84.8947	83.5012
MA0131.3	Moderately_Enriched	Homeotherm	Panthera_leo	85.1723	83.2567
MA0131.3	Moderately_Enriched	Homeotherm	Papio_anubis	85.108	83.4413
MA0131.3	Moderately_Enriched	Homeotherm	Parus_major	85.2712	83.7515
MA0131.3	Moderately_Enriched	Homeotherm	Pavo_cristatus	83.8615	82.8185
MA0131.3	Moderately_Enriched	Homeotherm	Phascolarctos_cinereus	83.8875	82.5255
MA0131.3	Moderately_Enriched	Homeotherm	Phasianus_colchicus	83.9298	81.8589
MA0131.3	Moderately_Enriched	Homeotherm	Physeter_catodon	85.1156	83.7475
MA0131.3	Moderately_Enriched	Homeotherm	Piliocolobus_tephrosceles	85.1769	83.4034
MA0131.3	Moderately_Enriched	Homeotherm	Pongo_abelii	84.8688	83.4895
MA0131.3	Moderately_Enriched	Homeotherm	Prolemur_simus	84.8295	83.2915
MA0131.3	Moderately_Enriched	Homeotherm	Pteropus_vampyrus	84.8807	83.3345
MA0131.3	Moderately_Enriched	Homeotherm	Rattus_norvegicus	84.9797	82.605
MA0131.3	Moderately_Enriched	Homeotherm	Rhinolophus_ferrumequinum	84.8324	82.6667
MA0131.3	Moderately_Enriched	Homeotherm	Rhinopithecus_roxellana	84.8167	83.0977
MA0131.3	Moderately_Enriched	Homeotherm	Sarcophilus_harrisii	84.469	83.5891
MA0131.3	Moderately_Enriched	Homeotherm	Sciurus_vulgaris	84.4794	82.8219
MA0131.3	Moderately_Enriched	Homeotherm	Serinus_canaria	85.2756	82.7076
MA0131.3	Moderately_Enriched	Homeotherm	Sorex_araneus	84.8864	83.3525
MA0131.3	Moderately_Enriched	Homeotherm	Stachyris_ruficeps	85.4093	83.6183
MA0131.3	Moderately_Enriched	Homeotherm	Strigops_habroptila	85.3622	83.6498
MA0131.3	Moderately_Enriched	Homeotherm	Strix_occidentalis		82.736
MA0131.3	Moderately_Enriched	Homeotherm	Strix_occidentalis_caurina	84.2064
MA0131.3	Moderately_Enriched	Homeotherm	Struthio_camelus		82.3018
MA0131.3	Moderately_Enriched	Homeotherm	Struthio_camelus_australis	83.2996
MA0131.3	Moderately_Enriched	Homeotherm	Sus_scrofa	84.8836	83.8372
MA0131.3	Moderately_Enriched	Homeotherm	Taeniopygia_guttata	85.4488	82.8166
MA0131.3	Moderately_Enriched	Homeotherm	Tupaia_belangeri	83.9286	82.7504
MA0131.3	Moderately_Enriched	Homeotherm	Urocitellus_parryii	84.9573	82.4802
MA0131.3	Moderately_Enriched	Homeotherm	Ursus_maritimus	84.0238	82.4325
MA0131.3	Moderately_Enriched	Homeotherm	Vulpes_vulpes	85.0386	83.6082
MA0131.3	Moderately_Enriched	Homeotherm	Zalophus_californianus	84.709	83.3101
MA0131.3	Moderately_Enriched	Homeotherm	Zonotrichia_albicollis	85.1962	82.7194
MA0131.3	Moderately_Enriched	Poikilotherm	Anolis_carolinensis	84.6667	82.9197
MA0131.3	Moderately_Enriched	Poikilotherm	Chelonoidis_abingdonii	84.5798	83.2423
MA0131.3	Moderately_Enriched	Poikilotherm	Chelydra_serpentina	84.2334	83.2012
MA0131.3	Moderately_Enriched	Poikilotherm	Chrysemys_picta		82.862
MA0131.3	Moderately_Enriched	Poikilotherm	Chrysemys_picta_bellii	84.8054
MA0131.3	Moderately_Enriched	Poikilotherm	Crocodylus_porosus	83.9982	82.16
MA0131.3	Moderately_Enriched	Poikilotherm	Erpetoichthys_calabaricus	82.7381	84.0643
MA0131.3	Moderately_Enriched	Poikilotherm	Gopherus_evgoodei	84.2255	83.5372
MA0131.3	Moderately_Enriched	Poikilotherm	Laticauda_laticaudata	85.1032	83.7757
MA0131.3	Moderately_Enriched	Poikilotherm	Latimeria_chalumnae	82.9114	80.8423
MA0131.3	Moderately_Enriched	Poikilotherm	Leptobrachium_leishanense	84.3344	83.5502
MA0131.3	Moderately_Enriched	Poikilotherm	Naja_naja	84.3895	85.1475
MA0131.3	Moderately_Enriched	Poikilotherm	Notechis_scutatus	84.6184	84.2439
MA0131.3	Moderately_Enriched	Poikilotherm	Pelodiscus_sinensis	83.5705	83.6661
MA0131.3	Moderately_Enriched	Poikilotherm	Pelusios_castaneus	83.9542	82.761
MA0131.3	Moderately_Enriched	Poikilotherm	Podarcis_muralis	84.7458	83.8701
MA0131.3	Moderately_Enriched	Poikilotherm	Pseudonaja_textilis		83.7188
MA0131.3	Moderately_Enriched	Poikilotherm	Pseudonaja_textlis	84.6268
MA0131.3	Moderately_Enriched	Poikilotherm	Salvator_merianae	84.9943	83.4813
MA0131.3	Moderately_Enriched	Poikilotherm	Sphenodon_punctatus	83.3433	83.1535
MA0131.3	Moderately_Enriched	Poikilotherm	Terrapene_carolina		83.6081
MA0131.3	Moderately_Enriched	Poikilotherm	Terrapene_carolina_triunguis	84.7994
MA0131.3	Moderately_Enriched	Poikilotherm	Varanus_komodoensis	85.4792	83.7068
MA0131.3	Moderately_Enriched	Poikilotherm	Xenopus_tropicalis	83.5332	83.1404
MA0136.4	Moderately_Enriched	Homeotherm	Amazona_collaria	48.1522
MA0136.4	Moderately_Enriched	Homeotherm	Anas_platyrhynchos	48.2422
MA0136.4	Moderately_Enriched	Homeotherm	Anas_platyrhynchos_platyrhynchos
MA0136.4	Moderately_Enriched	Homeotherm	Aotus_nancymaae	47.9853
MA0136.4	Moderately_Enriched	Homeotherm	Apteryx_haastii	48.0811
MA0136.4	Moderately_Enriched	Homeotherm	Aquila_chrysaetos	48.3696
MA0136.4	Moderately_Enriched	Homeotherm	Aquila_chrysaetos_chrysaetos
MA0136.4	Moderately_Enriched	Homeotherm	Athene_cunicularia	48.1752
MA0136.4	Moderately_Enriched	Homeotherm	Balaenoptera_musculus	47.9002
MA0136.4	Moderately_Enriched	Homeotherm	Bison_bison_bison	47.752
MA0136.4	Moderately_Enriched	Homeotherm	Bos_taurus	47.5949
MA0136.4	Moderately_Enriched	Homeotherm	Cairina_moschata_domestica	48.5577
MA0136.4	Moderately_Enriched	Homeotherm	Calidris_pugnax	47.8102
MA0136.4	Moderately_Enriched	Homeotherm	Callithrix_jacchus	48.003
MA0136.4	Moderately_Enriched	Homeotherm	Camelus_dromedarius	47.8604
MA0136.4	Moderately_Enriched	Homeotherm	Canis_lupus_familiaris	47.8604
MA0136.4	Moderately_Enriched	Homeotherm	Carlito_syrichta	47.7701
MA0136.4	Moderately_Enriched	Homeotherm	Castor_canadensis	48.2143
MA0136.4	Moderately_Enriched	Homeotherm	Catharus_ustulatus	48.3574
MA0136.4	Moderately_Enriched	Homeotherm	Cebus_imitator	48.0357
MA0136.4	Moderately_Enriched	Homeotherm	Cercocebus_atys	48.1999
MA0136.4	Moderately_Enriched	Homeotherm	Cervus_hanglu_yarkandensis	47.9656
MA0136.4	Moderately_Enriched	Homeotherm	Choloepus_hoffmanni	47.5
MA0136.4	Moderately_Enriched	Homeotherm	Corvus_moneduloides	48.2955
MA0136.4	Moderately_Enriched	Homeotherm	Coturnix_japonica	48.9243
MA0136.4	Moderately_Enriched	Homeotherm	Delphinapterus_leucas	47.4752
MA0136.4	Moderately_Enriched	Homeotherm	Echinops_telfairi	47.4895
MA0136.4	Moderately_Enriched	Homeotherm	Equus_asinus	47.8924
MA0136.4	Moderately_Enriched	Homeotherm	Equus_caballus	47.3485
MA0136.4	Moderately_Enriched	Homeotherm	Erinaceus_europaeus	47.4868
MA0136.4	Moderately_Enriched	Homeotherm	Felis_catus	48.4935
MA0136.4	Moderately_Enriched	Homeotherm	Ficedula_albicollis	47.7321
MA0136.4	Moderately_Enriched	Homeotherm	Gallus_gallus	48.1491
MA0136.4	Moderately_Enriched	Homeotherm	Geospiza_fortis	47.4265
MA0136.4	Moderately_Enriched	Homeotherm	Gorilla_gorilla	47.9257
MA0136.4	Moderately_Enriched	Homeotherm	Homo_sapiens	48.0572
MA0136.4	Moderately_Enriched	Homeotherm	Jaculus_jaculus	47.5301
MA0136.4	Moderately_Enriched	Homeotherm	Loxodonta_africana	47.2747
MA0136.4	Moderately_Enriched	Homeotherm	Lynx_canadensis	47.9196
MA0136.4	Moderately_Enriched	Homeotherm	Macaca_mulatta	48.1366
MA0136.4	Moderately_Enriched	Homeotherm	Manacus_vitellinus	47.5926
MA0136.4	Moderately_Enriched	Homeotherm	Meleagris_gallopavo	48.0222
MA0136.4	Moderately_Enriched	Homeotherm	Meriones_unguiculatus	47.8579
MA0136.4	Moderately_Enriched	Homeotherm	Microcebus_murinus	47.6347
MA0136.4	Moderately_Enriched	Homeotherm	Monodelphis_domestica	47.3109
MA0136.4	Moderately_Enriched	Homeotherm	Mus_musculus	47.3176
MA0136.4	Moderately_Enriched	Homeotherm	Mus_pahari	47.6433
MA0136.4	Moderately_Enriched	Homeotherm	Nannospalax_galili	48.1132
MA0136.4	Moderately_Enriched	Homeotherm	Neovison_vison	47.5962
MA0136.4	Moderately_Enriched	Homeotherm	Notamacropus_eugenii	47.4372
MA0136.4	Moderately_Enriched	Homeotherm	Nothoprocta_perdicaria	47.9814
MA0136.4	Moderately_Enriched	Homeotherm	Numida_meleagris	48.2143
MA0136.4	Moderately_Enriched	Homeotherm	Ornithorhynchus_anatinus	47.1966
MA0136.4	Moderately_Enriched	Homeotherm	Oryctolagus_cuniculus	47.5286
MA0136.4	Moderately_Enriched	Homeotherm	Otolemur_garnettii	47.7273
MA0136.4	Moderately_Enriched	Homeotherm	Pan_troglodytes	47.9548
MA0136.4	Moderately_Enriched	Homeotherm	Panthera_leo	48.0936
MA0136.4	Moderately_Enriched	Homeotherm	Papio_anubis	47.7987
MA0136.4	Moderately_Enriched	Homeotherm	Parus_major	48.0224
MA0136.4	Moderately_Enriched	Homeotherm	Pavo_cristatus	48.1445
MA0136.4	Moderately_Enriched	Homeotherm	Phascolarctos_cinereus	47.5277
MA0136.4	Moderately_Enriched	Homeotherm	Phasianus_colchicus	47.9933
MA0136.4	Moderately_Enriched	Homeotherm	Physeter_catodon	47.9819
MA0136.4	Moderately_Enriched	Homeotherm	Piliocolobus_tephrosceles	48.1073
MA0136.4	Moderately_Enriched	Homeotherm	Pongo_abelii	47.9867
MA0136.4	Moderately_Enriched	Homeotherm	Prolemur_simus	47.817
MA0136.4	Moderately_Enriched	Homeotherm	Pteropus_vampyrus	47.6774
MA0136.4	Moderately_Enriched	Homeotherm	Rattus_norvegicus	47.7246
MA0136.4	Moderately_Enriched	Homeotherm	Rhinolophus_ferrumequinum	47.7093
MA0136.4	Moderately_Enriched	Homeotherm	Rhinopithecus_roxellana	48.2687
MA0136.4	Moderately_Enriched	Homeotherm	Sarcophilus_harrisii	47.6624
MA0136.4	Moderately_Enriched	Homeotherm	Sciurus_vulgaris	48.257
MA0136.4	Moderately_Enriched	Homeotherm	Serinus_canaria	48.1459
MA0136.4	Moderately_Enriched	Homeotherm	Sorex_araneus	47.8846
MA0136.4	Moderately_Enriched	Homeotherm	Stachyris_ruficeps	48.0843
MA0136.4	Moderately_Enriched	Homeotherm	Strigops_habroptila	47.4734
MA0136.4	Moderately_Enriched	Homeotherm	Strix_occidentalis_caurina	47.7217
MA0136.4	Moderately_Enriched	Homeotherm	Struthio_camelus_australis	47.3611
MA0136.4	Moderately_Enriched	Homeotherm	Sus_scrofa	47.8298
MA0136.4	Moderately_Enriched	Homeotherm	Taeniopygia_guttata	48.3864
MA0136.4	Moderately_Enriched	Homeotherm	Tupaia_belangeri	47.4673
MA0136.4	Moderately_Enriched	Homeotherm	Urocitellus_parryii	47.7273
MA0136.4	Moderately_Enriched	Homeotherm	Ursus_maritimus	47.7142
MA0136.4	Moderately_Enriched	Homeotherm	Vulpes_vulpes	48.0412
MA0136.4	Moderately_Enriched	Homeotherm	Zalophus_californianus	47.4967
MA0136.4	Moderately_Enriched	Homeotherm	Zonotrichia_albicollis	48.2143
MA0136.4	Moderately_Enriched	Poikilotherm	Anolis_carolinensis	48.5202
MA0136.4	Moderately_Enriched	Poikilotherm	Chelonoidis_abingdonii	48.5526
MA0136.4	Moderately_Enriched	Poikilotherm	Chelydra_serpentina	47.7909
MA0136.4	Moderately_Enriched	Poikilotherm	Chrysemys_picta_bellii	48.0263
MA0136.4	Moderately_Enriched	Poikilotherm	Crocodylus_porosus	47.5385
MA0136.4	Moderately_Enriched	Poikilotherm	Erpetoichthys_calabaricus	48.1707
MA0136.4	Moderately_Enriched	Poikilotherm	Gopherus_evgoodei	47.873
MA0136.4	Moderately_Enriched	Poikilotherm	Laticauda_laticaudata	48.0686
MA0136.4	Moderately_Enriched	Poikilotherm	Latimeria_chalumnae	47.7083
MA0136.4	Moderately_Enriched	Poikilotherm	Leptobrachium_leishanense	47.619
MA0136.4	Moderately_Enriched	Poikilotherm	Naja_naja	47.9915
MA0136.4	Moderately_Enriched	Poikilotherm	Notechis_scutatus	48.2384
MA0136.4	Moderately_Enriched	Poikilotherm	Pelodiscus_sinensis	47.5564
MA0136.4	Moderately_Enriched	Poikilotherm	Pelusios_castaneus	47.9312
MA0136.4	Moderately_Enriched	Poikilotherm	Podarcis_muralis	48.385
MA0136.4	Moderately_Enriched	Poikilotherm	Pseudonaja_textilis
MA0136.4	Moderately_Enriched	Poikilotherm	Pseudonaja_textlis	47.9673
MA0136.4	Moderately_Enriched	Poikilotherm	Salvator_merianae	48.1739
MA0136.4	Moderately_Enriched	Poikilotherm	Sphenodon_punctatus	47.847
MA0136.4	Moderately_Enriched	Poikilotherm	Terrapene_carolina_triunguis	47.3771
MA0136.4	Moderately_Enriched	Poikilotherm	Varanus_komodoensis	48.2341
MA0136.4	Moderately_Enriched	Poikilotherm	Xenopus_tropicalis	47.6165
MA0143.5	Moderately_Reduced	Homeotherm	Amazona_collaria		42.8571
MA0143.5	Moderately_Reduced	Homeotherm	Anas_platyrhynchos		42.8571
MA0143.5	Moderately_Reduced	Homeotherm	Aotus_nancymaae		42.8571
MA0143.5	Moderately_Reduced	Homeotherm	Apteryx_haastii		42.8571
MA0143.5	Moderately_Reduced	Homeotherm	Aquila_chrysaetos		42.8571
MA0143.5	Moderately_Reduced	Homeotherm	Athene_cunicularia		42.8571
MA0143.5	Moderately_Reduced	Homeotherm	Balaenoptera_musculus		42.8571
MA0143.5	Moderately_Reduced	Homeotherm	Bison_bison		42.8571
MA0143.5	Moderately_Reduced	Homeotherm	Bos_taurus		42.8571
MA0143.5	Moderately_Reduced	Homeotherm	Cairina_moschata		42.8571
MA0143.5	Moderately_Reduced	Homeotherm	Calidris_pugnax		42.8571
MA0143.5	Moderately_Reduced	Homeotherm	Callithrix_jacchus		42.8571
MA0143.5	Moderately_Reduced	Homeotherm	Camelus_dromedarius		42.8571
MA0143.5	Moderately_Reduced	Homeotherm	Canis_lupus		42.8571
MA0143.5	Moderately_Reduced	Homeotherm	Carlito_syrichta		42.8571
MA0143.5	Moderately_Reduced	Homeotherm	Castor_canadensis		42.8571
MA0143.5	Moderately_Reduced	Homeotherm	Catharus_ustulatus		42.8571
MA0143.5	Moderately_Reduced	Homeotherm	Cebus_imitator		42.8571
MA0143.5	Moderately_Reduced	Homeotherm	Cercocebus_atys		42.8571
MA0143.5	Moderately_Reduced	Homeotherm	Cervus_hanglu		42.8571
MA0143.5	Moderately_Reduced	Homeotherm	Choloepus_hoffmanni		42.8571
MA0143.5	Moderately_Reduced	Homeotherm	Corvus_moneduloides		42.8571
MA0143.5	Moderately_Reduced	Homeotherm	Coturnix_japonica		42.8571
MA0143.5	Moderately_Reduced	Homeotherm	Delphinapterus_leucas		42.8571
MA0143.5	Moderately_Reduced	Homeotherm	Echinops_telfairi		42.8571
MA0143.5	Moderately_Reduced	Homeotherm	Equus_asinus		42.8571
MA0143.5	Moderately_Reduced	Homeotherm	Equus_caballus		42.8571
MA0143.5	Moderately_Reduced	Homeotherm	Erinaceus_europaeus		42.8571
MA0143.5	Moderately_Reduced	Homeotherm	Felis_catus		42.8571
MA0143.5	Moderately_Reduced	Homeotherm	Ficedula_albicollis		42.8571
MA0143.5	Moderately_Reduced	Homeotherm	Gallus_gallus		42.8571
MA0143.5	Moderately_Reduced	Homeotherm	Geospiza_fortis		42.8571
MA0143.5	Moderately_Reduced	Homeotherm	Gorilla_gorilla		42.8571
MA0143.5	Moderately_Reduced	Homeotherm	Homo_sapiens		42.8571
MA0143.5	Moderately_Reduced	Homeotherm	Jaculus_jaculus		42.8571
MA0143.5	Moderately_Reduced	Homeotherm	Loxodonta_africana		42.8571
MA0143.5	Moderately_Reduced	Homeotherm	Lynx_canadensis		42.8571
MA0143.5	Moderately_Reduced	Homeotherm	Macaca_mulatta		42.8571
MA0143.5	Moderately_Reduced	Homeotherm	Manacus_vitellinus		42.8571
MA0143.5	Moderately_Reduced	Homeotherm	Meleagris_gallopavo		42.8571
MA0143.5	Moderately_Reduced	Homeotherm	Meriones_unguiculatus		42.8571
MA0143.5	Moderately_Reduced	Homeotherm	Microcebus_murinus		42.8571
MA0143.5	Moderately_Reduced	Homeotherm	Monodelphis_domestica		42.8571
MA0143.5	Moderately_Reduced	Homeotherm	Mus_musculus		42.8571
MA0143.5	Moderately_Reduced	Homeotherm	Mus_pahari		42.8571
MA0143.5	Moderately_Reduced	Homeotherm	Nannospalax_galili		42.8571
MA0143.5	Moderately_Reduced	Homeotherm	Neovison_vison		42.8571
MA0143.5	Moderately_Reduced	Homeotherm	Notamacropus_eugenii		42.8571
MA0143.5	Moderately_Reduced	Homeotherm	Nothoprocta_perdicaria		42.8571
MA0143.5	Moderately_Reduced	Homeotherm	Numida_meleagris		42.8571
MA0143.5	Moderately_Reduced	Homeotherm	Ornithorhynchus_anatinus		42.8571
MA0143.5	Moderately_Reduced	Homeotherm	Oryctolagus_cuniculus		42.8571
MA0143.5	Moderately_Reduced	Homeotherm	Otolemur_garnettii		42.8571
MA0143.5	Moderately_Reduced	Homeotherm	Pan_troglodytes		42.8571
MA0143.5	Moderately_Reduced	Homeotherm	Panthera_leo		42.8571
MA0143.5	Moderately_Reduced	Homeotherm	Papio_anubis		42.8571
MA0143.5	Moderately_Reduced	Homeotherm	Parus_major		42.8571
MA0143.5	Moderately_Reduced	Homeotherm	Pavo_cristatus		42.8571
MA0143.5	Moderately_Reduced	Homeotherm	Phascolarctos_cinereus		42.8571
MA0143.5	Moderately_Reduced	Homeotherm	Phasianus_colchicus		42.8571
MA0143.5	Moderately_Reduced	Homeotherm	Physeter_catodon		42.8571
MA0143.5	Moderately_Reduced	Homeotherm	Piliocolobus_tephrosceles		42.8571
MA0143.5	Moderately_Reduced	Homeotherm	Pongo_abelii		42.8571
MA0143.5	Moderately_Reduced	Homeotherm	Prolemur_simus		42.8571
MA0143.5	Moderately_Reduced	Homeotherm	Pteropus_vampyrus		42.8571
MA0143.5	Moderately_Reduced	Homeotherm	Rattus_norvegicus		42.8571
MA0143.5	Moderately_Reduced	Homeotherm	Rhinolophus_ferrumequinum		42.8571
MA0143.5	Moderately_Reduced	Homeotherm	Rhinopithecus_roxellana		42.8571
MA0143.5	Moderately_Reduced	Homeotherm	Sarcophilus_harrisii		42.8571
MA0143.5	Moderately_Reduced	Homeotherm	Sciurus_vulgaris		42.8571
MA0143.5	Moderately_Reduced	Homeotherm	Serinus_canaria		42.8571
MA0143.5	Moderately_Reduced	Homeotherm	Sorex_araneus		42.8571
MA0143.5	Moderately_Reduced	Homeotherm	Stachyris_ruficeps		42.8571
MA0143.5	Moderately_Reduced	Homeotherm	Strigops_habroptila		42.8571
MA0143.5	Moderately_Reduced	Homeotherm	Strix_occidentalis		42.8571
MA0143.5	Moderately_Reduced	Homeotherm	Struthio_camelus		42.8571
MA0143.5	Moderately_Reduced	Homeotherm	Sus_scrofa		42.8571
MA0143.5	Moderately_Reduced	Homeotherm	Taeniopygia_guttata		42.8571
MA0143.5	Moderately_Reduced	Homeotherm	Tupaia_belangeri		42.8571
MA0143.5	Moderately_Reduced	Homeotherm	Urocitellus_parryii		42.8571
MA0143.5	Moderately_Reduced	Homeotherm	Ursus_maritimus		42.8571
MA0143.5	Moderately_Reduced	Homeotherm	Vulpes_vulpes		42.8571
MA0143.5	Moderately_Reduced	Homeotherm	Zalophus_californianus		42.8571
MA0143.5	Moderately_Reduced	Homeotherm	Zonotrichia_albicollis		42.8571
MA0143.5	Moderately_Reduced	Poikilotherm	Anolis_carolinensis		42.8571
MA0143.5	Moderately_Reduced	Poikilotherm	Chelonoidis_abingdonii		42.8571
MA0143.5	Moderately_Reduced	Poikilotherm	Chelydra_serpentina		42.8571
MA0143.5	Moderately_Reduced	Poikilotherm	Chrysemys_picta		42.8571
MA0143.5	Moderately_Reduced	Poikilotherm	Crocodylus_porosus		42.8571
MA0143.5	Moderately_Reduced	Poikilotherm	Erpetoichthys_calabaricus		42.8571
MA0143.5	Moderately_Reduced	Poikilotherm	Gopherus_evgoodei		42.8571
MA0143.5	Moderately_Reduced	Poikilotherm	Laticauda_laticaudata		42.8571
MA0143.5	Moderately_Reduced	Poikilotherm	Latimeria_chalumnae		42.8571
MA0143.5	Moderately_Reduced	Poikilotherm	Leptobrachium_leishanense		42.8571
MA0143.5	Moderately_Reduced	Poikilotherm	Naja_naja		42.8571
MA0143.5	Moderately_Reduced	Poikilotherm	Notechis_scutatus		42.8571
MA0143.5	Moderately_Reduced	Poikilotherm	Pelodiscus_sinensis		42.8571
MA0143.5	Moderately_Reduced	Poikilotherm	Pelusios_castaneus		42.8571
MA0143.5	Moderately_Reduced	Poikilotherm	Podarcis_muralis		42.8571
MA0143.5	Moderately_Reduced	Poikilotherm	Pseudonaja_textilis		42.8571
MA0143.5	Moderately_Reduced	Poikilotherm	Salvator_merianae		42.8571
MA0143.5	Moderately_Reduced	Poikilotherm	Sphenodon_punctatus		42.8571
MA0143.5	Moderately_Reduced	Poikilotherm	Terrapene_carolina		42.8571
MA0143.5	Moderately_Reduced	Poikilotherm	Varanus_komodoensis		42.8571
MA0143.5	Moderately_Reduced	Poikilotherm	Xenopus_tropicalis		42.8571
MA0145.2	Highly_Enriched	Homeotherm	Amazona_collaria	83.4836
MA0145.2	Highly_Enriched	Homeotherm	Anas_platyrhynchos	84.162
MA0145.2	Highly_Enriched	Homeotherm	Anas_platyrhynchos_platyrhynchos
MA0145.2	Highly_Enriched	Homeotherm	Aotus_nancymaae	81.0957
MA0145.2	Highly_Enriched	Homeotherm	Apteryx_haastii	84.8822
MA0145.2	Highly_Enriched	Homeotherm	Aquila_chrysaetos	88.7334
MA0145.2	Highly_Enriched	Homeotherm	Aquila_chrysaetos_chrysaetos
MA0145.2	Highly_Enriched	Homeotherm	Athene_cunicularia	78.0635
MA0145.2	Highly_Enriched	Homeotherm	Balaenoptera_musculus	79.6281
MA0145.2	Highly_Enriched	Homeotherm	Bison_bison_bison	77.3765
MA0145.2	Highly_Enriched	Homeotherm	Bos_taurus	80.6662
MA0145.2	Highly_Enriched	Homeotherm	Cairina_moschata_domestica	85.5296
MA0145.2	Highly_Enriched	Homeotherm	Calidris_pugnax	79.4276
MA0145.2	Highly_Enriched	Homeotherm	Callithrix_jacchus	80.2307
MA0145.2	Highly_Enriched	Homeotherm	Camelus_dromedarius	79.9651
MA0145.2	Highly_Enriched	Homeotherm	Canis_lupus_familiaris	84.5458
MA0145.2	Highly_Enriched	Homeotherm	Carlito_syrichta	78.5334
MA0145.2	Highly_Enriched	Homeotherm	Castor_canadensis	79.6435
MA0145.2	Highly_Enriched	Homeotherm	Catharus_ustulatus	84.6927
MA0145.2	Highly_Enriched	Homeotherm	Cebus_imitator	80.2721
MA0145.2	Highly_Enriched	Homeotherm	Cercocebus_atys	80.153
MA0145.2	Highly_Enriched	Homeotherm	Cervus_hanglu_yarkandensis	79.3055
MA0145.2	Highly_Enriched	Homeotherm	Choloepus_hoffmanni	75.0928
MA0145.2	Highly_Enriched	Homeotherm	Corvus_moneduloides	85.5406
MA0145.2	Highly_Enriched	Homeotherm	Coturnix_japonica	84.5162
MA0145.2	Highly_Enriched	Homeotherm	Delphinapterus_leucas	79.7717
MA0145.2	Highly_Enriched	Homeotherm	Echinops_telfairi	77.8555
MA0145.2	Highly_Enriched	Homeotherm	Equus_asinus	81.3435
MA0145.2	Highly_Enriched	Homeotherm	Equus_caballus	76.0369
MA0145.2	Highly_Enriched	Homeotherm	Erinaceus_europaeus	77.4554
MA0145.2	Highly_Enriched	Homeotherm	Felis_catus	78.3208
MA0145.2	Highly_Enriched	Homeotherm	Ficedula_albicollis	81.6849
MA0145.2	Highly_Enriched	Homeotherm	Gallus_gallus	85.8105
MA0145.2	Highly_Enriched	Homeotherm	Geospiza_fortis	78.2683
MA0145.2	Highly_Enriched	Homeotherm	Gorilla_gorilla	79.1932
MA0145.2	Highly_Enriched	Homeotherm	Homo_sapiens	79.5789
MA0145.2	Highly_Enriched	Homeotherm	Jaculus_jaculus	80.4511
MA0145.2	Highly_Enriched	Homeotherm	Loxodonta_africana	77.9082
MA0145.2	Highly_Enriched	Homeotherm	Lynx_canadensis	81.3245
MA0145.2	Highly_Enriched	Homeotherm	Macaca_mulatta	80.0717
MA0145.2	Highly_Enriched	Homeotherm	Manacus_vitellinus	80.8714
MA0145.2	Highly_Enriched	Homeotherm	Meleagris_gallopavo	76.643
MA0145.2	Highly_Enriched	Homeotherm	Meriones_unguiculatus	80.5772
MA0145.2	Highly_Enriched	Homeotherm	Microcebus_murinus	81.2891
MA0145.2	Highly_Enriched	Homeotherm	Monodelphis_domestica	79.8309
MA0145.2	Highly_Enriched	Homeotherm	Mus_musculus	78.1381
MA0145.2	Highly_Enriched	Homeotherm	Mus_pahari	70.967
MA0145.2	Highly_Enriched	Homeotherm	Nannospalax_galili	78.4727
MA0145.2	Highly_Enriched	Homeotherm	Neovison_vison	78.4718
MA0145.2	Highly_Enriched	Homeotherm	Notamacropus_eugenii	81.8388
MA0145.2	Highly_Enriched	Homeotherm	Nothoprocta_perdicaria	86.6079
MA0145.2	Highly_Enriched	Homeotherm	Numida_meleagris	83.1405
MA0145.2	Highly_Enriched	Homeotherm	Ornithorhynchus_anatinus	84.8987
MA0145.2	Highly_Enriched	Homeotherm	Oryctolagus_cuniculus	79.0294
MA0145.2	Highly_Enriched	Homeotherm	Otolemur_garnettii	78.8623
MA0145.2	Highly_Enriched	Homeotherm	Pan_troglodytes	79.8032
MA0145.2	Highly_Enriched	Homeotherm	Panthera_leo	81.6352
MA0145.2	Highly_Enriched	Homeotherm	Papio_anubis	79.3628
MA0145.2	Highly_Enriched	Homeotherm	Parus_major	84.5379
MA0145.2	Highly_Enriched	Homeotherm	Pavo_cristatus	83.4471
MA0145.2	Highly_Enriched	Homeotherm	Phascolarctos_cinereus	80.0814
MA0145.2	Highly_Enriched	Homeotherm	Phasianus_colchicus	84.8156
MA0145.2	Highly_Enriched	Homeotherm	Physeter_catodon	80.3499
MA0145.2	Highly_Enriched	Homeotherm	Piliocolobus_tephrosceles	79.8255
MA0145.2	Highly_Enriched	Homeotherm	Pongo_abelii	80.1368
MA0145.2	Highly_Enriched	Homeotherm	Prolemur_simus	80.077
MA0145.2	Highly_Enriched	Homeotherm	Pteropus_vampyrus	79.3218
MA0145.2	Highly_Enriched	Homeotherm	Rattus_norvegicus	78.842
MA0145.2	Highly_Enriched	Homeotherm	Rhinolophus_ferrumequinum	79.4445
MA0145.2	Highly_Enriched	Homeotherm	Rhinopithecus_roxellana	78.6401
MA0145.2	Highly_Enriched	Homeotherm	Sarcophilus_harrisii	81.7884
MA0145.2	Highly_Enriched	Homeotherm	Sciurus_vulgaris	81.1913
MA0145.2	Highly_Enriched	Homeotherm	Serinus_canaria	81.5993
MA0145.2	Highly_Enriched	Homeotherm	Sorex_araneus	77.883
MA0145.2	Highly_Enriched	Homeotherm	Stachyris_ruficeps	85.2574
MA0145.2	Highly_Enriched	Homeotherm	Strigops_habroptila	85.4707
MA0145.2	Highly_Enriched	Homeotherm	Strix_occidentalis_caurina	83.8932
MA0145.2	Highly_Enriched	Homeotherm	Struthio_camelus_australis	78.242
MA0145.2	Highly_Enriched	Homeotherm	Sus_scrofa	81.0357
MA0145.2	Highly_Enriched	Homeotherm	Taeniopygia_guttata	87.3616
MA0145.2	Highly_Enriched	Homeotherm	Tupaia_belangeri	77.6543
MA0145.2	Highly_Enriched	Homeotherm	Urocitellus_parryii	80.2805
MA0145.2	Highly_Enriched	Homeotherm	Ursus_maritimus	74.5566
MA0145.2	Highly_Enriched	Homeotherm	Vulpes_vulpes	79.9964
MA0145.2	Highly_Enriched	Homeotherm	Zalophus_californianus	80.6746
MA0145.2	Highly_Enriched	Homeotherm	Zonotrichia_albicollis	84.2571
MA0145.2	Highly_Enriched	Poikilotherm	Anolis_carolinensis	74.9632
MA0145.2	Highly_Enriched	Poikilotherm	Chelonoidis_abingdonii	77.0183
MA0145.2	Highly_Enriched	Poikilotherm	Chelydra_serpentina	79.1546
MA0145.2	Highly_Enriched	Poikilotherm	Chrysemys_picta_bellii	78.6085
MA0145.2	Highly_Enriched	Poikilotherm	Crocodylus_porosus	80.3424
MA0145.2	Highly_Enriched	Poikilotherm	Erpetoichthys_calabaricus	71.2798
MA0145.2	Highly_Enriched	Poikilotherm	Gopherus_evgoodei	80.888
MA0145.2	Highly_Enriched	Poikilotherm	Laticauda_laticaudata	77.884
MA0145.2	Highly_Enriched	Poikilotherm	Latimeria_chalumnae	68.7579
MA0145.2	Highly_Enriched	Poikilotherm	Leptobrachium_leishanense	71.6931
MA0145.2	Highly_Enriched	Poikilotherm	Naja_naja	77.9063
MA0145.2	Highly_Enriched	Poikilotherm	Notechis_scutatus	76.834
MA0145.2	Highly_Enriched	Poikilotherm	Pelodiscus_sinensis	75.2867
MA0145.2	Highly_Enriched	Poikilotherm	Pelusios_castaneus	79.7282
MA0145.2	Highly_Enriched	Poikilotherm	Podarcis_muralis	74.077
MA0145.2	Highly_Enriched	Poikilotherm	Pseudonaja_textilis
MA0145.2	Highly_Enriched	Poikilotherm	Pseudonaja_textlis	78.5426
MA0145.2	Highly_Enriched	Poikilotherm	Salvator_merianae	77.8039
MA0145.2	Highly_Enriched	Poikilotherm	Sphenodon_punctatus	75.8081
MA0145.2	Highly_Enriched	Poikilotherm	Terrapene_carolina_triunguis	78.5684
MA0145.2	Highly_Enriched	Poikilotherm	Varanus_komodoensis	84.4779
MA0145.2	Highly_Enriched	Poikilotherm	Xenopus_tropicalis	69.4352
MA0146.3	Moderately_Enriched	Homeotherm	Amazona_collaria	82.5549
MA0146.3	Moderately_Enriched	Homeotherm	Anas_platyrhynchos	83.5305
MA0146.3	Moderately_Enriched	Homeotherm	Anas_platyrhynchos_platyrhynchos
MA0146.3	Moderately_Enriched	Homeotherm	Aotus_nancymaae	81.9948
MA0146.3	Moderately_Enriched	Homeotherm	Apteryx_haastii	82.7673
MA0146.3	Moderately_Enriched	Homeotherm	Aquila_chrysaetos	83.9104
MA0146.3	Moderately_Enriched	Homeotherm	Aquila_chrysaetos_chrysaetos
MA0146.3	Moderately_Enriched	Homeotherm	Athene_cunicularia	81.4516
MA0146.3	Moderately_Enriched	Homeotherm	Balaenoptera_musculus	82.5485
MA0146.3	Moderately_Enriched	Homeotherm	Bison_bison_bison	80.7692
MA0146.3	Moderately_Enriched	Homeotherm	Bos_taurus	82.3553
MA0146.3	Moderately_Enriched	Homeotherm	Cairina_moschata_domestica	83.7931
MA0146.3	Moderately_Enriched	Homeotherm	Calidris_pugnax	82.5834
MA0146.3	Moderately_Enriched	Homeotherm	Callithrix_jacchus	82.0914
MA0146.3	Moderately_Enriched	Homeotherm	Camelus_dromedarius	81.6955
MA0146.3	Moderately_Enriched	Homeotherm	Canis_lupus_familiaris	84.2102
MA0146.3	Moderately_Enriched	Homeotherm	Carlito_syrichta	81.5782
MA0146.3	Moderately_Enriched	Homeotherm	Castor_canadensis	82.6946
MA0146.3	Moderately_Enriched	Homeotherm	Catharus_ustulatus	83.9358
MA0146.3	Moderately_Enriched	Homeotherm	Cebus_imitator	82.2907
MA0146.3	Moderately_Enriched	Homeotherm	Cercocebus_atys	81.9047
MA0146.3	Moderately_Enriched	Homeotherm	Cervus_hanglu_yarkandensis	81.8389
MA0146.3	Moderately_Enriched	Homeotherm	Choloepus_hoffmanni	81.6772
MA0146.3	Moderately_Enriched	Homeotherm	Corvus_moneduloides	84.0605
MA0146.3	Moderately_Enriched	Homeotherm	Coturnix_japonica	82.1477
MA0146.3	Moderately_Enriched	Homeotherm	Delphinapterus_leucas	81.9037
MA0146.3	Moderately_Enriched	Homeotherm	Echinops_telfairi	81.7633
MA0146.3	Moderately_Enriched	Homeotherm	Equus_asinus	82.5072
MA0146.3	Moderately_Enriched	Homeotherm	Equus_caballus	79.2899
MA0146.3	Moderately_Enriched	Homeotherm	Erinaceus_europaeus	81.1131
MA0146.3	Moderately_Enriched	Homeotherm	Felis_catus	81.1583
MA0146.3	Moderately_Enriched	Homeotherm	Ficedula_albicollis	82.5311
MA0146.3	Moderately_Enriched	Homeotherm	Gallus_gallus	83.3041
MA0146.3	Moderately_Enriched	Homeotherm	Geospiza_fortis	80.7194
MA0146.3	Moderately_Enriched	Homeotherm	Gorilla_gorilla	81.1969
MA0146.3	Moderately_Enriched	Homeotherm	Homo_sapiens	82.0745
MA0146.3	Moderately_Enriched	Homeotherm	Jaculus_jaculus	82.7816
MA0146.3	Moderately_Enriched	Homeotherm	Loxodonta_africana	81.1084
MA0146.3	Moderately_Enriched	Homeotherm	Lynx_canadensis	82.956
MA0146.3	Moderately_Enriched	Homeotherm	Macaca_mulatta	81.9947
MA0146.3	Moderately_Enriched	Homeotherm	Manacus_vitellinus	81.4905
MA0146.3	Moderately_Enriched	Homeotherm	Meleagris_gallopavo	80.8661
MA0146.3	Moderately_Enriched	Homeotherm	Meriones_unguiculatus	83.1226
MA0146.3	Moderately_Enriched	Homeotherm	Microcebus_murinus	82.8041
MA0146.3	Moderately_Enriched	Homeotherm	Monodelphis_domestica	80.8373
MA0146.3	Moderately_Enriched	Homeotherm	Mus_musculus	82.0155
MA0146.3	Moderately_Enriched	Homeotherm	Mus_pahari	77.2904
MA0146.3	Moderately_Enriched	Homeotherm	Nannospalax_galili	82.8697
MA0146.3	Moderately_Enriched	Homeotherm	Neovison_vison	81.4532
MA0146.3	Moderately_Enriched	Homeotherm	Notamacropus_eugenii	82.1963
MA0146.3	Moderately_Enriched	Homeotherm	Nothoprocta_perdicaria	83.6306
MA0146.3	Moderately_Enriched	Homeotherm	Numida_meleagris	82.5576
MA0146.3	Moderately_Enriched	Homeotherm	Ornithorhynchus_anatinus	83.9536
MA0146.3	Moderately_Enriched	Homeotherm	Oryctolagus_cuniculus	81.5654
MA0146.3	Moderately_Enriched	Homeotherm	Otolemur_garnettii	81.5854
MA0146.3	Moderately_Enriched	Homeotherm	Pan_troglodytes	81.6921
MA0146.3	Moderately_Enriched	Homeotherm	Panthera_leo	82.8855
MA0146.3	Moderately_Enriched	Homeotherm	Papio_anubis	81.3593
MA0146.3	Moderately_Enriched	Homeotherm	Parus_major	83.2424
MA0146.3	Moderately_Enriched	Homeotherm	Pavo_cristatus	82.9123
MA0146.3	Moderately_Enriched	Homeotherm	Phascolarctos_cinereus	81.8332
MA0146.3	Moderately_Enriched	Homeotherm	Phasianus_colchicus	83.8564
MA0146.3	Moderately_Enriched	Homeotherm	Physeter_catodon	82.5976
MA0146.3	Moderately_Enriched	Homeotherm	Piliocolobus_tephrosceles	81.2057
MA0146.3	Moderately_Enriched	Homeotherm	Pongo_abelii	82.084
MA0146.3	Moderately_Enriched	Homeotherm	Prolemur_simus	81.9847
MA0146.3	Moderately_Enriched	Homeotherm	Pteropus_vampyrus	81.5175
MA0146.3	Moderately_Enriched	Homeotherm	Rattus_norvegicus	82.3085
MA0146.3	Moderately_Enriched	Homeotherm	Rhinolophus_ferrumequinum	82.0097
MA0146.3	Moderately_Enriched	Homeotherm	Rhinopithecus_roxellana	81.2834
MA0146.3	Moderately_Enriched	Homeotherm	Sarcophilus_harrisii	82.407
MA0146.3	Moderately_Enriched	Homeotherm	Sciurus_vulgaris	82.5564
MA0146.3	Moderately_Enriched	Homeotherm	Serinus_canaria	82.047
MA0146.3	Moderately_Enriched	Homeotherm	Sorex_araneus	82.0228
MA0146.3	Moderately_Enriched	Homeotherm	Stachyris_ruficeps	83.8502
MA0146.3	Moderately_Enriched	Homeotherm	Strigops_habroptila	84.2857
MA0146.3	Moderately_Enriched	Homeotherm	Strix_occidentalis_caurina	83.3187
MA0146.3	Moderately_Enriched	Homeotherm	Struthio_camelus_australis	79.9422
MA0146.3	Moderately_Enriched	Homeotherm	Sus_scrofa	82.196
MA0146.3	Moderately_Enriched	Homeotherm	Taeniopygia_guttata	84.4486
MA0146.3	Moderately_Enriched	Homeotherm	Tupaia_belangeri	81.1605
MA0146.3	Moderately_Enriched	Homeotherm	Urocitellus_parryii	82.3389
MA0146.3	Moderately_Enriched	Homeotherm	Ursus_maritimus	79.3475
MA0146.3	Moderately_Enriched	Homeotherm	Vulpes_vulpes	82.0389
MA0146.3	Moderately_Enriched	Homeotherm	Zalophus_californianus	82.4387
MA0146.3	Moderately_Enriched	Homeotherm	Zonotrichia_albicollis	82.7799
MA0146.3	Moderately_Enriched	Poikilotherm	Anolis_carolinensis	82.1993
MA0146.3	Moderately_Enriched	Poikilotherm	Chelonoidis_abingdonii	81.104
MA0146.3	Moderately_Enriched	Poikilotherm	Chelydra_serpentina	81.9379
MA0146.3	Moderately_Enriched	Poikilotherm	Chrysemys_picta_bellii	81.7226
MA0146.3	Moderately_Enriched	Poikilotherm	Crocodylus_porosus	81.5421
MA0146.3	Moderately_Enriched	Poikilotherm	Erpetoichthys_calabaricus	79.5575
MA0146.3	Moderately_Enriched	Poikilotherm	Gopherus_evgoodei	82.1252
MA0146.3	Moderately_Enriched	Poikilotherm	Laticauda_laticaudata	81.2461
MA0146.3	Moderately_Enriched	Poikilotherm	Latimeria_chalumnae	80.2273
MA0146.3	Moderately_Enriched	Poikilotherm	Leptobrachium_leishanense	78.7243
MA0146.3	Moderately_Enriched	Poikilotherm	Naja_naja	81.6836
MA0146.3	Moderately_Enriched	Poikilotherm	Notechis_scutatus	81.4263
MA0146.3	Moderately_Enriched	Poikilotherm	Pelodiscus_sinensis	80.0412
MA0146.3	Moderately_Enriched	Poikilotherm	Pelusios_castaneus	81.9732
MA0146.3	Moderately_Enriched	Poikilotherm	Podarcis_muralis	81.2621
MA0146.3	Moderately_Enriched	Poikilotherm	Pseudonaja_textilis
MA0146.3	Moderately_Enriched	Poikilotherm	Pseudonaja_textlis	81.9395
MA0146.3	Moderately_Enriched	Poikilotherm	Salvator_merianae	81.0938
MA0146.3	Moderately_Enriched	Poikilotherm	Sphenodon_punctatus	79.8967
MA0146.3	Moderately_Enriched	Poikilotherm	Terrapene_carolina_triunguis	81.6171
MA0146.3	Moderately_Enriched	Poikilotherm	Varanus_komodoensis	81.7598
MA0146.3	Moderately_Enriched	Poikilotherm	Xenopus_tropicalis	78.3498
MA0163.1	Highly_Reduced	Homeotherm	Amazona_collaria	85.5189
MA0163.1	Highly_Reduced	Homeotherm	Anas_platyrhynchos	86.9391
MA0163.1	Highly_Reduced	Homeotherm	Anas_platyrhynchos_platyrhynchos
MA0163.1	Highly_Reduced	Homeotherm	Aotus_nancymaae	81.0374
MA0163.1	Highly_Reduced	Homeotherm	Apteryx_haastii	83.8627
MA0163.1	Highly_Reduced	Homeotherm	Aquila_chrysaetos	89.1763
MA0163.1	Highly_Reduced	Homeotherm	Aquila_chrysaetos_chrysaetos
MA0163.1	Highly_Reduced	Homeotherm	Athene_cunicularia	83.0612
MA0163.1	Highly_Reduced	Homeotherm	Balaenoptera_musculus	83.1775
MA0163.1	Highly_Reduced	Homeotherm	Bison_bison_bison	80.2714
MA0163.1	Highly_Reduced	Homeotherm	Bos_taurus	83.0788
MA0163.1	Highly_Reduced	Homeotherm	Cairina_moschata_domestica	86.2018
MA0163.1	Highly_Reduced	Homeotherm	Calidris_pugnax	83.1616
MA0163.1	Highly_Reduced	Homeotherm	Callithrix_jacchus	81.8073
MA0163.1	Highly_Reduced	Homeotherm	Camelus_dromedarius	82.6406
MA0163.1	Highly_Reduced	Homeotherm	Canis_lupus_familiaris	90.0107
MA0163.1	Highly_Reduced	Homeotherm	Carlito_syrichta	81.7405
MA0163.1	Highly_Reduced	Homeotherm	Castor_canadensis	83.6227
MA0163.1	Highly_Reduced	Homeotherm	Catharus_ustulatus	81.1006
MA0163.1	Highly_Reduced	Homeotherm	Cebus_imitator	82.411
MA0163.1	Highly_Reduced	Homeotherm	Cercocebus_atys	81.4075
MA0163.1	Highly_Reduced	Homeotherm	Cervus_hanglu_yarkandensis	84.848
MA0163.1	Highly_Reduced	Homeotherm	Choloepus_hoffmanni	79.4652
MA0163.1	Highly_Reduced	Homeotherm	Corvus_moneduloides	83.6229
MA0163.1	Highly_Reduced	Homeotherm	Coturnix_japonica	82.06
MA0163.1	Highly_Reduced	Homeotherm	Delphinapterus_leucas	84.0672
MA0163.1	Highly_Reduced	Homeotherm	Echinops_telfairi	81.6761
MA0163.1	Highly_Reduced	Homeotherm	Equus_asinus	85.5943
MA0163.1	Highly_Reduced	Homeotherm	Equus_caballus	82.6972
MA0163.1	Highly_Reduced	Homeotherm	Erinaceus_europaeus	81.5962
MA0163.1	Highly_Reduced	Homeotherm	Felis_catus	93.7218
MA0163.1	Highly_Reduced	Homeotherm	Ficedula_albicollis	81.1272
MA0163.1	Highly_Reduced	Homeotherm	Gallus_gallus	85.0378
MA0163.1	Highly_Reduced	Homeotherm	Geospiza_fortis	79.1932
MA0163.1	Highly_Reduced	Homeotherm	Gorilla_gorilla	80.9201
MA0163.1	Highly_Reduced	Homeotherm	Homo_sapiens	81.8894
MA0163.1	Highly_Reduced	Homeotherm	Jaculus_jaculus	82.4177
MA0163.1	Highly_Reduced	Homeotherm	Loxodonta_africana	80.5585
MA0163.1	Highly_Reduced	Homeotherm	Lynx_canadensis	86.4888
MA0163.1	Highly_Reduced	Homeotherm	Macaca_mulatta	81.527
MA0163.1	Highly_Reduced	Homeotherm	Manacus_vitellinus	81.0485
MA0163.1	Highly_Reduced	Homeotherm	Meleagris_gallopavo	79.0021
MA0163.1	Highly_Reduced	Homeotherm	Meriones_unguiculatus	84.8349
MA0163.1	Highly_Reduced	Homeotherm	Microcebus_murinus	82.1871
MA0163.1	Highly_Reduced	Homeotherm	Monodelphis_domestica	81.5676
MA0163.1	Highly_Reduced	Homeotherm	Mus_musculus	83.539
MA0163.1	Highly_Reduced	Homeotherm	Mus_pahari	78.2875
MA0163.1	Highly_Reduced	Homeotherm	Nannospalax_galili	83.6105
MA0163.1	Highly_Reduced	Homeotherm	Neovison_vison	81.3584
MA0163.1	Highly_Reduced	Homeotherm	Notamacropus_eugenii	81.1125
MA0163.1	Highly_Reduced	Homeotherm	Nothoprocta_perdicaria	83.508
MA0163.1	Highly_Reduced	Homeotherm	Numida_meleagris	82.9536
MA0163.1	Highly_Reduced	Homeotherm	Ornithorhynchus_anatinus	84.797
MA0163.1	Highly_Reduced	Homeotherm	Oryctolagus_cuniculus	82.4903
MA0163.1	Highly_Reduced	Homeotherm	Otolemur_garnettii	80.368
MA0163.1	Highly_Reduced	Homeotherm	Pan_troglodytes	82.9428
MA0163.1	Highly_Reduced	Homeotherm	Panthera_leo	90.0465
MA0163.1	Highly_Reduced	Homeotherm	Papio_anubis	82.1063
MA0163.1	Highly_Reduced	Homeotherm	Parus_major	82.1954
MA0163.1	Highly_Reduced	Homeotherm	Pavo_cristatus	83.3321
MA0163.1	Highly_Reduced	Homeotherm	Phascolarctos_cinereus	81.2782
MA0163.1	Highly_Reduced	Homeotherm	Phasianus_colchicus	84.8147
MA0163.1	Highly_Reduced	Homeotherm	Physeter_catodon	83.3028
MA0163.1	Highly_Reduced	Homeotherm	Piliocolobus_tephrosceles	83.8162
MA0163.1	Highly_Reduced	Homeotherm	Pongo_abelii	81.8966
MA0163.1	Highly_Reduced	Homeotherm	Prolemur_simus	80.9733
MA0163.1	Highly_Reduced	Homeotherm	Pteropus_vampyrus	81.4456
MA0163.1	Highly_Reduced	Homeotherm	Rattus_norvegicus	82.8519
MA0163.1	Highly_Reduced	Homeotherm	Rhinolophus_ferrumequinum	82.282
MA0163.1	Highly_Reduced	Homeotherm	Rhinopithecus_roxellana	80.9745
MA0163.1	Highly_Reduced	Homeotherm	Sarcophilus_harrisii	87.7429
[truncated: 17,159 more rows]

## Sheet: Absolute GC summary
Motif_ID	Identity	Region	Status	Homeotherm	Poikilotherm	Motif_Name
MA0024.3	Highly Enriched	Genome	Free	63.9881	62.3296	E2F1
MA0024.3	Highly Enriched	Genome	G4	73.2883	70.3504	E2F1
MA0028.3	Highly Reduced	Promoter	Free	62.7609	61.3585	ELK1
MA0028.3	Highly Reduced	Promoter	G4	68.8019	66.8071	ELK1
MA0028.3	Moderately Enriched	Genome	Free	56.0998	57.51	ELK1
MA0028.3	Moderately Enriched	Genome	G4	67.0068	64.6824	ELK1
MA0067.3	Highly Enriched	Genome	Free	56.3437	56.4878	PAX2
MA0067.3	Highly Enriched	Genome	G4	74.301	72.4228	PAX2
MA0073.2	Highly Reduced	Promoter	Free	62.5648	63.0322	RREB1
MA0073.2	Highly Reduced	Promoter	G4	77.7083	76.1237	RREB1
MA0076.3	Highly Enriched	Genome	Free	56.2479	57.6713	ELK4
MA0076.3	Highly Enriched	Genome	G4	64.9327	63.9665	ELK4
MA0079.5	Moderately Reduced	Promoter	Free	89.6744	88.4319	SP1
MA0079.5	Moderately Reduced	Promoter	G4	92.9658	93.8851	SP1
MA0080.7	Highly Reduced	Promoter	Free	50.8338	50.8023	Spi1
MA0080.7	Highly Reduced	Promoter	G4	62.9148	62.9677	Spi1
MA0081.3	Highly Reduced	Promoter	Free	51.0064	50.945	SPIB
MA0081.3	Highly Reduced	Promoter	G4	63.3993	63.2732	SPIB
MA0104.5	Moderately Enriched	Genome	Free	69.5988	70.1107	MYCN
MA0104.5	Moderately Enriched	Genome	G4	73.8453	73.7459	MYCN
MA0111.1	Highly Reduced	Promoter	Free	58.1853	58.0507	Spz1
MA0111.1	Highly Reduced	Promoter	G4	67.3323	66.5978	Spz1
MA0113.4	Moderately Reduced	Genome	Free	45.7423	45.7375	NR3C1
MA0113.4	Moderately Reduced	Genome	G4	61.8485	59.0219	NR3C1
MA0124.3	Highly Enriched	Genome	Free	42.8571	42.8571	Nkx3-1
MA0124.3	Highly Enriched	Genome	G4	42.8571	42.8571	Nkx3-1
MA0131.3	Moderately Enriched	Genome	Free	81.4956	81.573	HINFP
MA0131.3	Moderately Enriched	Genome	G4	83.0607	83.3644	HINFP
MA0131.3	Moderately Enriched	Promoter	Free	83.7222	83.0003	HINFP
MA0131.3	Moderately Enriched	Promoter	G4	84.6245	84.2691	HINFP
MA0136.4	Moderately Enriched	Promoter	Free	45.581	45.9761	Elf5
MA0136.4	Moderately Enriched	Promoter	G4	47.8737	47.9613	Elf5
MA0143.5	Moderately Reduced	Genome	Free	42.8571	42.8571	SOX2
MA0143.5	Moderately Reduced	Genome	G4	42.8571	42.8571	SOX2
MA0145.2	Highly Enriched	Promoter	Free	70.3808	66.468	Tfcp2l1
MA0145.2	Highly Enriched	Promoter	G4	80.7347	76.6218	Tfcp2l1
MA0146.3	Moderately Enriched	Promoter	Free	76.9487	75.7291	Zfx
MA0146.3	Moderately Enriched	Promoter	G4	82.1783	81.0204	Zfx
MA0163.1	Highly Reduced	Promoter	Free	77.2925	76.3098	PLAG1
MA0163.1	Highly Reduced	Promoter	G4	82.9834	83.314	PLAG1
MA0258.2	Highly Enriched	Promoter	Free	63.6925	61.8807	ESR2
MA0258.2	Highly Enriched	Promoter	G4	74.2312	72.6028	ESR2
MA0469.4	Highly Reduced	Genome	Free	44.4363	45.2195	E2F3
MA0469.4	Highly Reduced	Genome	G4	51.5866	53.3463	E2F3
MA0469.4	Moderately Reduced	Promoter	Free	48.4746	47.3935	E2F3
MA0469.4	Moderately Reduced	Promoter	G4	55.1476	55.626	E2F3
MA0472.2	Moderately Enriched	Promoter	Free	81.1708	76.783	EGR2
MA0472.2	Moderately Enriched	Promoter	G4	88.4218	84.2875	EGR2
MA0475.3	Moderately Reduced	Genome	Free	45.7503	48.6398	FLI1
MA0475.3	Moderately Reduced	Genome	G4	57.5558	55.8809	FLI1
MA0478.2	Moderately Enriched	Genome	Free	48.8209	46.5327	FOSL2
MA0478.2	Moderately Enriched	Genome	G4	59.3185	58.0417	FOSL2
MA0478.2	Moderately Enriched	Promoter	Free	51.0129	47.7346	FOSL2
MA0478.2	Moderately Enriched	Promoter	G4	59.6383	57.6885	FOSL2
MA0499.3	Moderately Enriched	Genome	Free	63.5423	63.1737	MYOD1
MA0499.3	Moderately Enriched	Genome	G4	70.9261	70.5402	MYOD1
MA0500.3	Highly Enriched	Genome	Free	65.9128	66.0848	MYOG
MA0500.3	Highly Enriched	Genome	G4	70.0296	70.0265	MYOG
MA0506.3	Highly Enriched	Promoter	Free	83.8939	79.8466	Nrf1
MA0506.3	Highly Enriched	Promoter	G4	89.5468	85.8555	Nrf1
MA0508.4	Highly Enriched	Genome	Free	42.8571	42.8571	PRDM1
MA0508.4	Highly Enriched	Genome	G4	42.8571	42.8571	PRDM1
MA0508.4	Highly Enriched	Promoter	Free	42.8571	42.8571	PRDM1
MA0508.4	Highly Enriched	Promoter	G4	42.8571	42.8571	PRDM1
MA0509.3	Moderately Reduced	Genome	Free	42.2832	44.0864	RFX1
MA0509.3	Moderately Reduced	Genome	G4	58.5022	57.5816	RFX1
MA0514.3	Moderately Reduced	Genome	Free	42.8571	42.8571	Sox3
MA0514.3	Moderately Reduced	Genome	G4	42.8571	42.8571	Sox3
MA0519.2	Highly Enriched	Genome	Free	39.4826	40.5765	Stat5a::Stat5b
MA0519.2	Highly Enriched	Genome	G4	50.0077	50.1272	Stat5a::Stat5b
MA0519.2	Moderately Enriched	Promoter	Free	42.1415	42.1018	Stat5a::Stat5b
MA0519.2	Moderately Enriched	Promoter	G4	53.0154	52.2845	Stat5a::Stat5b
MA0526.5	Moderately Reduced	Promoter	Free	61.1538	56.9912	USF2
MA0526.5	Moderately Reduced	Promoter	G4	67.5959	65.849	USF2
MA0527.2	Moderately Enriched	Genome	Free	67.1167	67.5746	ZBTB33
MA0527.2	Moderately Enriched	Genome	G4	82.894	80.2094	ZBTB33
MA0594.3	Moderately Reduced	Genome	Free	42.8571	42.8571	HOXA9
MA0594.3	Moderately Reduced	Genome	G4	42.8571	42.8571	HOXA9
MA0595.1	Moderately Enriched	Genome	Free	54.9466	54.702	SREBF1
MA0595.1	Moderately Enriched	Genome	G4	63.2679	62.8295	SREBF1
MA0596.1	Highly Enriched	Genome	Free	52.0198	52.1759	SREBF2
MA0596.1	Highly Enriched	Genome	G4	61.814	61.3377	SREBF2
MA0604.1	Moderately Reduced	Genome	Free	54.2661	54.1417	Atf1
MA0604.1	Moderately Reduced	Genome	G4	59.3419	58.2579	Atf1
MA0620.4	Moderately Reduced	Promoter	Free	54.3025	51.8949	MITF
MA0620.4	Moderately Reduced	Promoter	G4	64.3876	60.8233	MITF
MA0632.3	Highly Enriched	Promoter	Free	91.1388	89.6239	TCFL5
MA0632.3	Highly Enriched	Promoter	G4	94.8829	92.9514	TCFL5
MA0632.3	Moderately Enriched	Genome	Free	81.117	82.3171	TCFL5
MA0632.3	Moderately Enriched	Genome	G4	92.2082	87.8276	TCFL5
MA0638.2	Highly Reduced	Genome	Free	53.3782	53.9631	CREB3
MA0638.2	Highly Reduced	Genome	G4	66.3228	64.9612	CREB3
MA0640.3	Moderately Enriched	Promoter	Free	53.8386	53.3866	ELF3
MA0640.3	Moderately Enriched	Promoter	G4	60.1359	59.3723	ELF3
MA0646.2	Highly Enriched	Promoter	Free	67.6077	64.1229	GCM1
MA0646.2	Highly Enriched	Promoter	G4	75.4387	72.5141	GCM1
MA0685.2	Moderately Reduced	Promoter	Free	88.6884	87.569	SP4
MA0685.2	Moderately Reduced	Promoter	G4	93.0135	94.1097	SP4
MA0693.4	Moderately Enriched	Genome	Free	42.8571	42.8571	Vdr
MA0693.4	Moderately Enriched	Genome	G4	42.8571	42.8571	Vdr
MA0712.3	Highly Enriched	Promoter	Free	42.8571	42.8571	OTX2
MA0712.3	Highly Enriched	Promoter	G4	42.8571	42.8571	OTX2
MA0728.1	Highly Enriched	Promoter	Free	50.5282	48.6969	Nr2F6
MA0728.1	Highly Enriched	Promoter	G4	64.2633	61.476	Nr2F6
MA0729.1	Highly Enriched	Promoter	Free	48.1578	46.5886	RARA
MA0729.1	Highly Enriched	Promoter	G4	64.9358	62.8968	RARA
MA0736.1	Moderately Reduced	Promoter	Free	78.5402	76.8803	GLIS2
MA0736.1	Moderately Reduced	Promoter	G4	83.4099	82.2583	GLIS2
MA0739.2	Moderately Enriched	Genome	Free	66.1794	65.4672	Hic1
MA0739.2	Moderately Enriched	Genome	G4	69.2428	67.8917	Hic1
MA0741.1	Highly Reduced	Promoter	Free	84.7316	83.7957	KLF16
MA0741.1	Highly Reduced	Promoter	G4	89.3058	90.1431	KLF16
MA0745.3	Highly Enriched	Promoter	Free	65.9567	65.2892	SNAI2
MA0745.3	Highly Enriched	Promoter	G4	70.6007	70.197	SNAI2
MA0747.2	Highly Reduced	Promoter	Free	81.9205	81.367	SP8
MA0747.2	Highly Reduced	Promoter	G4	87.9926	89.1754	SP8
MA0749.2	Moderately Reduced	Genome	Free	41.7974	43.0314	ZBED1
MA0749.2	Moderately Reduced	Genome	G4	55.7277	53.9091	ZBED1
MA0753.3	Highly Reduced	Promoter	Free	85.1975	85.0575	ZNF740
MA0753.3	Highly Reduced	Promoter	G4	89.464	90.2332	ZNF740
MA0763.2	Highly Reduced	Genome	Free	50.157	52.6757	ETV3
MA0763.2	Highly Reduced	Genome	G4	62.9918	61.0478	ETV3
MA0764.4	Highly Reduced	Promoter	Free	63.5729	62.1615	ETV4
MA0764.4	Highly Reduced	Promoter	G4	69.1448	67.1487	ETV4
MA0765.4	Highly Reduced	Promoter	Free	65.1512	63.6302	ETV5
MA0765.4	Highly Reduced	Promoter	G4	69.0721	67.335	ETV5
MA0765.4	Moderately Enriched	Genome	Free	61.6572	61.5867	ETV5
MA0765.4	Moderately Enriched	Genome	G4	68.3918	67.0508	ETV5
MA0779.2	Highly Enriched	Genome	Free	52.8264	53.3246	PAX1
MA0779.2	Highly Enriched	Genome	G4	69.8995	68.3587	PAX1
MA0781.2	Highly Enriched	Genome	Free	53.8019	54.2084	PAX9
MA0781.2	Highly Enriched	Genome	G4	71.0337	68.9565	PAX9
MA0781.2	Moderately Reduced	Promoter	Free	64.4679	60.2357	PAX9
MA0781.2	Moderately Reduced	Promoter	G4	77.6057	73.5299	PAX9
MA0798.3	Highly Reduced	Genome	Free	45.1229	47.013	RFX3
MA0798.3	Highly Reduced	Genome	G4	61.0423	60.2888	RFX3
MA0799.3	Moderately Reduced	Genome	Free	53.5836	54.2833	RFX4
MA0799.3	Moderately Reduced	Genome	G4	65.9515	63.9081	RFX4
MA0801.1	Moderately Enriched	Promoter	Free	53.1292	52.367	MGA
MA0801.1	Moderately Enriched	Promoter	G4	58.9503	58.2598	MGA
MA0803.1	Moderately Enriched	Genome	Free	53.6722	53.3657	TBX15
MA0803.1	Moderately Enriched	Genome	G4	60.7212	60.279	TBX15
MA0807.1	Moderately Enriched	Promoter	Free	53.9484	53.4947	TBX5
MA0807.1	Moderately Enriched	Promoter	G4	59.3138	58.9098	TBX5
MA0809.3	Moderately Enriched	Genome	Free	36.9625	37.4512	TEAD4
MA0809.3	Moderately Enriched	Genome	G4	44.7419	44.9418	TEAD4
MA0812.2	Moderately Enriched	Promoter	Free	88.7128	86.1674	TFAP2B
MA0812.2	Moderately Enriched	Promoter	G4	91.9633	89.5568	TFAP2B
MA0814.3	Moderately Enriched	Promoter	Free	83.0897	81.69	TFAP2C
MA0814.3	Moderately Enriched	Promoter	G4	88.0922	86.3749	TFAP2C
MA0821.2	Moderately Enriched	Promoter	Free	78.0213	75.574	HES5
MA0821.2	Moderately Enriched	Promoter	G4	85.435	82.389	HES5
MA0823.1	Moderately Enriched	Genome	Free	66.8863	67.0298	HEY1
MA0823.1	Moderately Enriched	Genome	G4	74.7477	74.4801	HEY1
MA0831.3	Moderately Reduced	Promoter	Free	58.5203	54.9681	TFE3
MA0831.3	Moderately Reduced	Promoter	G4	65.2428	62.9251	TFE3
MA0837.3	Moderately Reduced	Promoter	Free	38.588	38.2761	CEBPE
MA0837.3	Moderately Reduced	Promoter	G4	47.0985	47.5226	CEBPE
MA0857.1	Moderately Enriched	Promoter	Free	49.2409	47.7984	Rarb
MA0857.1	Moderately Enriched	Promoter	G4	62.6589	61.8226	Rarb
MA0858.1	Highly Enriched	Genome	Free	47.1409	46.8861	Rarb
MA0858.1	Highly Enriched	Genome	G4	63.806	62.5429	Rarb
MA0863.1	Highly Enriched	Genome	Free	53.4239	53.147	MTF1
MA0863.1	Highly Enriched	Genome	G4	68.9144	66.4596	MTF1
MA1099.3	Moderately Enriched	Genome	Free	73.433	74.4741	HES1
MA1099.3	Moderately Enriched	Genome	G4	84.0155	81.4017	HES1
MA1099.3	Moderately Enriched	Promoter	Free	83.5924	80.4023	HES1
MA1099.3	Moderately Enriched	Promoter	G4	89.5352	86.2653	HES1
MA1100.3	Highly Enriched	Genome	Free	70.4725	70.4682	ASCL1
MA1100.3	Highly Enriched	Genome	G4	73.1358	72.817	ASCL1
MA1114.2	Moderately Enriched	Promoter	Free	55.1931	53.9292	PBX3
MA1114.2	Moderately Enriched	Promoter	G4	65.0206	63.1964	PBX3
MA1117.2	Highly Reduced	Promoter	Free	57.1429	57.1429	RELB
MA1117.2	Highly Reduced	Promoter	G4	57.1429	57.1429	RELB
MA1120.2	Moderately Reduced	Genome	Free	42.8571	42.8571	SOX13
MA1120.2	Moderately Reduced	Genome	G4	42.8571	42.8571	SOX13
MA1125.2	Highly Enriched	Genome	Free	1.02433	1.68806	ZNF384
MA1125.2	Highly Enriched	Genome	G4	3.04307	3.35867	ZNF384
MA1125.2	Moderately Enriched	Promoter	Free	0.960289	1.67118	ZNF384
MA1125.2	Moderately Enriched	Promoter	G4	2.50934	3.18167	ZNF384
MA1466.2	Highly Reduced	Genome	Free	53.0355	53.6272	ATF6
MA1466.2	Highly Reduced	Genome	G4	67.4277	66.3095	ATF6
MA1472.3	Highly Enriched	Genome	Free	65.8628	65.7458	Bhlha15
MA1472.3	Highly Enriched	Genome	G4	70.4734	70.4578	Bhlha15
MA1474.2	Highly Enriched	Promoter	Free	69.0185	66.7365	CREB3L4
MA1474.2	Highly Enriched	Promoter	G4	79.9086	78.5312	CREB3L4
MA1474.2	Moderately Enriched	Genome	Free	63.0312	62.9638	CREB3L4
MA1474.2	Moderately Enriched	Genome	G4	74.8776	75.273	CREB3L4
MA1483.3	Highly Reduced	Genome	Free	49.1856	50.3677	ELF2
MA1483.3	Highly Reduced	Genome	G4	61.6581	61.5834	ELF2
MA1484.2	Highly Reduced	Genome	Free	54.7829	56.7753	ETS2
MA1484.2	Highly Reduced	Genome	G4	63.6222	62.9261	ETS2
MA1485.1	Moderately Enriched	Genome	Free	59.9654	60.2848	FERD3L
MA1485.1	Moderately Enriched	Genome	G4	72.8544	72.7784	FERD3L
MA1513.2	Moderately Enriched	Promoter	Free	97.5086	96.8831	KLF15
MA1513.2	Moderately Enriched	Promoter	G4	98.2264	97.9096	KLF15
MA1516.2	Moderately Enriched	Promoter	Free	86.6314	83.5871	KLF3
MA1516.2	Moderately Enriched	Promoter	G4	91.9138	89.2095	KLF3
MA1523.2	Highly Enriched	Promoter	Free	57.1429	57.1429	MSANTD3
MA1523.2	Highly Enriched	Promoter	G4	57.1429	57.1429	MSANTD3
MA1524.3	Moderately Enriched	Genome	Free	43.5759	44.6035	Msgn1
MA1524.3	Moderately Enriched	Genome	G4	54.44	54.7564	Msgn1
MA1528.2	Highly Enriched	Promoter	Free	70.5526	66.681	NFIX
MA1528.2	Highly Enriched	Promoter	G4	81.831	78.1509	NFIX
MA1529.2	Moderately Enriched	Genome	Free	60.1646	59.8308	NHLH2
MA1529.2	Moderately Enriched	Genome	G4	71.889	71.3176	NHLH2
MA1531.2	Moderately Reduced	Promoter	Free	61.9475	60.3476	NR1D1
MA1531.2	Moderately Reduced	Promoter	G4	74.3086	71.8629	NR1D1
MA1532.2	Highly Reduced	Promoter	Free	57.0684	55.429	NR1D2
MA1532.2	Highly Reduced	Promoter	G4	70.8712	68.6328	NR1D2
MA1532.2	Moderately Reduced	Genome	Free	50.3576	50.752	NR1D2
MA1532.2	Moderately Reduced	Genome	G4	68.1879	66.7547	NR1D2
MA1533.2	Highly Enriched	Promoter	Free	62.4967	57.6504	NR1I2
MA1533.2	Highly Enriched	Promoter	G4	80.1166	76.1716	NR1I2
MA1544.2	Moderately Reduced	Genome	Free	41.9236	42.637	OVOL1
MA1544.2	Moderately Reduced	Genome	G4	47.3602	47.8853	OVOL1
MA1545.2	Moderately Reduced	Genome	Free	42.8571	42.8571	OVOL2
MA1545.2	Moderately Reduced	Genome	G4	42.8571	42.8571	OVOL2
MA1547.2	Moderately Enriched	Promoter	Free	36.1694	36.2046	PITX2
MA1547.2	Moderately Enriched	Promoter	G4	42.7497	41.8458	PITX2
MA1553.2	Moderately Enriched	Promoter	Free	54.9187	53.3314	RARG
MA1553.2	Moderately Enriched	Promoter	G4	70.7935	68.481	RARG
MA1554.2	Moderately Reduced	Genome	Free	50.5926	51.786	RFX7
MA1554.2	Moderately Reduced	Genome	G4	59.7519	59.0453	RFX7
MA1555.1	Highly Reduced	Genome	Free	53.346	54.0574	RXRB
MA1555.1	Highly Reduced	Genome	G4	69.3933	68.9785	RXRB
MA1558.2	Highly Enriched	Promoter	Free	65.5479	65.2019	SNAI1
MA1558.2	Highly Enriched	Promoter	G4	68.1871	67.8341	SNAI1
MA1559.2	Moderately Enriched	Promoter	Free	62.9999	61.8127	SNAI3
MA1559.2	Moderately Enriched	Promoter	G4	69.9412	69.2487	SNAI3
MA1564.2	Highly Reduced	Promoter	Free	87.2861	86.9721	SP9
MA1564.2	Highly Reduced	Promoter	G4	91.6597	93.2042	SP9
MA1576.2	Moderately Enriched	Genome	Free	50.623	50.728	THRB
MA1576.2	Moderately Enriched	Genome	G4	66.2974	66.3021	THRB
MA1580.1	Moderately Reduced	Promoter	Free	33.6121	32.6979	ZBTB32
MA1580.1	Moderately Reduced	Promoter	G4	42.9971	40.3383	ZBTB32
MA1583.2	Highly Enriched	Genome	Free	75.679	76.0347	ZFP57
MA1583.2	Highly Enriched	Genome	G4	79.1862	77.6205	ZFP57
MA1585.2	Moderately Enriched	Promoter	Free	49.4855	49.9789	ZKSCAN1
MA1585.2	Moderately Enriched	Promoter	G4	57.2821	57.0737	ZKSCAN1
MA1589.3	Moderately Reduced	Genome	Free	47.7786	48.7466	ZNF140
MA1589.3	Moderately Reduced	Genome	G4	60.4645	60.8459	ZNF140
MA1602.2	Highly Reduced	Genome	Free	48.3003	48.0643	ZSCAN29
MA1602.2	Highly Reduced	Genome	G4	61.1614	58.9828	ZSCAN29
MA1602.2	Moderately Reduced	Promoter	Free	54.3763	50.8044	ZSCAN29
MA1602.2	Moderately Reduced	Promoter	G4	65.871	62.0423	ZSCAN29
MA1619.2	Moderately Reduced	Genome	Free	60.6366	61.2206	Ptf1A
MA1619.2	Moderately Reduced	Genome	G4	63.8211	64.5977	Ptf1A
MA1625.2	Highly Enriched	Genome	Free	42.922	44.6705	Stat5b
MA1625.2	Highly Enriched	Genome	G4	51.4571	51.8267	Stat5b
MA1630.3	Moderately Enriched	Genome	Free	75.4617	76.8996	ZNF281
MA1630.3	Moderately Enriched	Genome	G4	86.5501	86.9228	ZNF281
MA1630.3	Moderately Reduced	Promoter	Free	83.74	82.6832	ZNF281
MA1630.3	Moderately Reduced	Promoter	G4	87.6786	88.1109	ZNF281
MA1632.2	Moderately Enriched	Genome	Free	39.0793	38.699	ATF2
MA1632.2	Moderately Enriched	Genome	G4	47.741	46.0452	ATF2
MA1641.2	Highly Reduced	Genome	Free	62.5542	62.9695	MYF5
MA1641.2	Highly Reduced	Genome	G4	64.4822	65.2936	MYF5
MA1645.2	Highly Enriched	Promoter	Free	55.6498	55.3969	NKX2-2
MA1645.2	Highly Enriched	Promoter	G4	60.5055	60.168	NKX2-2
MA1653.2	Moderately Reduced	Promoter	Free	85.5524	84.1784	ZNF148
MA1653.2	Moderately Reduced	Promoter	G4	88.3885	89.3588	ZNF148
MA1654.2	Moderately Reduced	Promoter	Free	62.2006	59.9041	ZNF16
MA1654.2	Moderately Reduced	Promoter	G4	72.3086	70.6848	ZNF16
MA1712.2	Highly Enriched	Promoter	Free	80.757	77.5824	ZNF454
MA1712.2	Highly Enriched	Promoter	G4	85.863	83.1948	ZNF454
MA1713.2	Moderately Enriched	Promoter	Free	86.3829	84.2348	ZNF610
MA1713.2	Moderately Enriched	Promoter	G4	89.0412	87.4629	ZNF610
MA1714.2	Highly Reduced	Promoter	Free	51.0706	50.4845	ZNF675
MA1714.2	Highly Reduced	Promoter	G4	63.8943	63.1963	ZNF675
MA1721.2	Moderately Enriched	Promoter	Free	83.0778	78.1362	ZNF93
MA1721.2	Moderately Enriched	Promoter	G4	89.2358	86.1247	ZNF93
MA1725.2	Moderately Enriched	Genome	Free	54.3811	55.03	ZNF189
MA1725.2	Moderately Enriched	Genome	G4	59.9525	59.1633	ZNF189
MA1727.2	Moderately Enriched	Genome	Free	73.5653	74.0682	ZNF417
MA1727.2	Moderately Enriched	Genome	G4	75.2585	75.8477	ZNF417
MA1938.2	Moderately Enriched	Genome	Free	56.9691	57.2996	ERF::NHLH1
MA1938.2	Moderately Enriched	Genome	G4	70.6944	68.8732	ERF::NHLH1
MA1946.2	Highly Enriched	Genome	Free	45.4792	46.2129	ETV5::FOXI1
MA1946.2	Highly Enriched	Genome	G4	58.2194	57.3533	ETV5::FOXI1
MA1967.2	Highly Enriched	Genome	Free	56.2766	56.2242	TFAP4::FLI1
MA1967.2	Highly Enriched	Genome	G4	67.0955	66.5514	TFAP4::FLI1
MA1977.2	Moderately Enriched	Genome	Free	49.363	48.931	ZNF324
MA1977.2	Moderately Enriched	Genome	G4	62.5945	62.1868	ZNF324
MA1979.2	Highly Enriched	Promoter	Free	63.1523	61.6114	ZNF416
MA1979.2	Highly Enriched	Promoter	G4	68.0728	67.1288	ZNF416
MA1983.2	Highly Enriched	Genome	Free	42.8271	43.5331	ZNF582
MA1983.2	Highly Enriched	Genome	G4	62.0551	59.9983	ZNF582
MA1987.2	Highly Reduced	Promoter	Free	69.4695	68.5108	ZNF701
MA1987.2	Highly Reduced	Promoter	G4	78.5382	78.4569	ZNF701
MA1998.2	Moderately Enriched	Promoter	Free	49.9438	51.0537	Prdm14
MA1998.2	Moderately Enriched	Promoter	G4	57.485	56.5968	Prdm14
MA2094.1	Highly Enriched	Genome	Free	56.63	56.8232	PAX8
MA2094.1	Highly Enriched	Genome	G4	73.3361	70.4872	PAX8
MA2102.1	Moderately Reduced	Genome	Free	34.4923	34.1821	ZBTB17
MA2102.1	Moderately Reduced	Genome	G4	36.2089	35.7656	ZBTB17
MA2102.1	Moderately Reduced	Promoter	Free	34.7287	34.1803	ZBTB17
MA2102.1	Moderately Reduced	Promoter	G4	36.3781	37.2533	ZBTB17
MA2328.1	Moderately Enriched	Promoter	Free	91.8343	90.3573	ZBED4
MA2328.1	Moderately Enriched	Promoter	G4	93.4873	92.8861	ZBED4
MA2340.1	Moderately Enriched	Promoter	Free	67.3475	65.3014	Zbtb2
MA2340.1	Moderately Enriched	Promoter	G4	72.1862	70.5845	Zbtb2
MA2489.1	Moderately Enriched	Genome	Free	19.2486	23.361	ZFP28
MA2489.1	Moderately Enriched	Genome	G4	34.6267	34.2164	ZFP28
MA2489.1	Moderately Enriched	Promoter	Free	18.2193	23.3459	ZFP28
MA2489.1	Moderately Enriched	Promoter	G4	34.3812	34.4188	ZFP28
MA2490.1	Highly Enriched	Genome	Free	43.8599	44.4091	ZFP3
MA2490.1	Highly Enriched	Genome	G4	55.7101	55.7274	ZFP3
MA2493.1	Moderately Enriched	Promoter	Free	62.0712	60.2413	ZNF322
MA2493.1	Moderately Enriched	Promoter	G4	71.2136	69.4625	ZNF322
MA2494.1	Moderately Reduced	Promoter	Free	65.1267	63.0944	ZNF436
MA2494.1	Moderately Reduced	Promoter	G4	76.0523	73.8201	ZNF436
MA2503.1	Highly Enriched	Genome	Free	64.0893	64.3983	Banp
MA2503.1	Highly Enriched	Genome	G4	80.0101	77.3165	Banp
MA2519.1	Highly Reduced	Promoter	Free	62.5931	61.2687	ZNF606
MA2519.1	Highly Reduced	Promoter	G4	73.267	71.2874	ZNF606
MA2524.1	Moderately Enriched	Promoter	Free	47.6619	46.6841	ZNF696
MA2524.1	Moderately Enriched	Promoter	G4	65.0831	63.6551	ZNF696
MA2528.1	Highly Enriched	Promoter	Free	63.0765	60.8886	ZNF732
MA2528.1	Highly Enriched	Promoter	G4	74.7635	72.5109	ZNF732
MA2531.1	Moderately Reduced	Promoter	Free	53.6114	53.8808	ZNF775
MA2531.1	Moderately Reduced	Promoter	G4	66.4501	66.4074	ZNF775
MA2534.1	Moderately Reduced	Promoter	Free	61.2721	60.4997	ZNF831
MA2534.1	Moderately Reduced	Promoter	G4	70.1468	68.7214	ZNF831
MA2538.1	Moderately Enriched	Genome	Free	85.7808	82.9586	CGGBP1
MA2538.1	Moderately Enriched	Genome	G4	92.3153	90.8483	CGGBP1
MA2538.1	Moderately Enriched	Promoter	Free	90.0059	87.3534	CGGBP1
MA2538.1	Moderately Enriched	Promoter	G4	93.1211	91.649	CGGBP1
MA2539.1	Moderately Enriched	Promoter	Free	96.2979	95.0247	SLC2A4RG
MA2539.1	Moderately Enriched	Promoter	G4	97.9011	97.3308	SLC2A4RG
MA2541.1	Moderately Enriched	Genome	Free	60.8559	61.2263	CREB3L3
MA2541.1	Moderately Enriched	Genome	G4	72.3983	71.7473	CREB3L3
MA2545.1	Highly Enriched	Promoter	Free	59.0684	57.0221	ZNF57
MA2545.1	Highly Enriched	Promoter	G4	69.4729	67.2164	ZNF57
MA2553.1	Moderately Enriched	Genome	Free	67.5077	66.53	ZNF407
MA2553.1	Moderately Enriched	Genome	G4	81.0452	78.496	ZNF407
MA2553.1	Moderately Enriched	Promoter	Free	78.6916	74.1608	ZNF407
MA2553.1	Moderately Enriched	Promoter	G4	85.1102	81.7038	ZNF407
MA2554.1	Moderately Enriched	Genome	Free	29.01	30.643	ZNF471
MA2554.1	Moderately Enriched	Genome	G4	47.5889	46.7281	ZNF471
MA2569.1	Moderately Enriched	Genome	Free	59.4715	59.0068	ZNF676
MA2569.1	Moderately Enriched	Genome	G4	73.2684	71.9244	ZNF676
MA2573.1	Highly Enriched	Promoter	Free	70.1731	65.1509	ZNF836
MA2573.1	Highly Enriched	Promoter	G4	84.6204	80.1353	ZNF836
MA2580.1	Moderately Enriched	Promoter	Free	53.1335	51.8482	ZNF20
MA2580.1	Moderately Enriched	Promoter	G4	59.03	56.9533	ZNF20
MA2581.1	Moderately Enriched	Genome	Free	76.2855	76.4268	ZNF66
MA2581.1	Moderately Enriched	Genome	G4	77.4121	77.1379	ZNF66
MA2582.1	Highly Enriched	Promoter	Free	56.0837	55.4318	ZNF121
MA2582.1	Highly Enriched	Promoter	G4	64.3235	63.8642	ZNF121
MA2585.1	Highly Enriched	Genome	Free	55.1947	53.6721	ZNF500
MA2585.1	Highly Enriched	Genome	G4	67.4153	65.8317	ZNF500
MA2588.1	Highly Enriched	Promoter	Free	90.832	88.2977	FAM200B
MA2588.1	Highly Enriched	Promoter	G4	92.8025	91.0888	FAM200B
MA2588.1	Moderately Enriched	Genome	Free	84.1733	83.9766	FAM200B
MA2588.1	Moderately Enriched	Genome	G4	90.0971	88.6305	FAM200B
MA2590.1	Moderately Reduced	Genome	Free	49.2386	49.7818	ZNF841
MA2590.1	Moderately Reduced	Genome	G4	65.0274	63.3783	ZNF841
MA2593.1	Moderately Enriched	Genome	Free	5.18289	6.19803	ZNF362
MA2593.1	Moderately Enriched	Genome	G4	10.1192	9.39132	ZNF362
MA2593.1	Moderately Enriched	Promoter	Free	4.9488	6.11415	ZNF362
MA2593.1	Moderately Enriched	Promoter	G4	10.0129	9.55344	ZNF362
MA2594.1	Moderately Enriched	Genome	Free	62.7255	62.5592	DMTF1
MA2594.1	Moderately Enriched	Genome	G4	73.4126	73.3871	DMTF1
MA2597.1	Highly Enriched	Promoter	Free	37.9379	38.2312	LEUTX
MA2597.1	Highly Enriched	Promoter	G4	45.0589	45.8079	LEUTX
MA2601.1	Moderately Enriched	Genome	Free	69.5988	70.1107	USF3
MA2601.1	Moderately Enriched	Genome	G4	73.8453	73.7459	USF3
MA2602.1	Moderately Enriched	Promoter	Free	86.4374	85.0072	ZBED5
MA2602.1	Moderately Enriched	Promoter	G4	88.2386	87.0162	ZBED5
MA2628.1	Moderately Enriched	Genome	Free	69.5639	69.8393	HELT
MA2628.1	Moderately Enriched	Genome	G4	75.9469	75.9133	HELT
MA2688.1	Highly Reduced	Promoter	Free	63.8627	63.3194	ZNF347
MA2688.1	Highly Reduced	Promoter	G4	74.8785	75.9202	ZNF347
MA2689.1	Moderately Enriched	Genome	Free	34.2753	36.0409	ZNF470
MA2689.1	Moderately Enriched	Genome	G4	51.2232	51.0709	ZNF470
